# Supplementary material for: An 11-point time course midgut transcriptome across 72 h after blood feeding provides detailed temporal resolution of transcript expression in the arbovirus vector, Aedes aegypti
Source: bioRxiv preprint, doi:10.1101/2023.03.03.531062, version 2 (2023-07-19)
Supplement: Supplemental Table S1 [file 531062_file04.xlsx]

## Sheet: Mg1v0
geneID	baseMean	log2FoldChange	lfcSE	stat	pvalue	padj
AAEL010068	4056.07	2.93519	0.181024	16.2144	3.99168e-59	5.01834e-55
AAEL006883	1389.26	-3.5068	0.232347	-15.093	1.8019e-51	1.13268e-47
AAEL019845	18400.1	2.3046	0.153834	14.981	9.7664e-51	4.09277e-47
AAEL004589	8722.38	2.11787	0.141679	14.9484	1.59612e-50	5.0166e-47
AAEL011371	5824.47	3.54997	0.286384	12.3958	2.75352e-35	6.92345e-32
AAEL013987	15086.3	2.33949	0.200395	11.6744	1.72355e-31	3.61141e-28
AAEL000670	5185.26	6.73483	0.577892	11.6541	2.18573e-31	3.92556e-28
AAEL007114	6654.46	4.24466	0.37669	11.2683	1.88124e-29	2.95637e-26
AAEL003505	11909.1	1.3982	0.133055	10.5084	7.90183e-26	1.1038e-22
AAEL023266	6.7913	-38.7215	3.72061	-10.4073	2.29645e-25	2.8871e-22
AAEL010411	7386.04	1.90565	0.186016	10.2445	1.25227e-24	1.43123e-21
AAEL008953	13665	1.36238	0.133552	10.2011	1.96017e-24	2.0536e-21
AAEL003978	196.77	2.7005	0.278192	9.70733	2.80597e-22	2.55623e-19
AAEL005651	5838.3	1.95913	0.201851	9.70586	2.84658e-22	2.55623e-19
AAEL011810	2759.55	2.89271	0.343768	8.41473	3.93793e-17	3.30051e-14
AAEL008096	13523.5	1.92117	0.229421	8.374	5.56959e-17	4.3763e-14
AAEL009762	3301.91	6.07424	0.732981	8.28703	1.16109e-16	8.58663e-14
AAEL026349	34.9549	9.71826	1.17958	8.23876	1.74008e-16	1.21535e-13
AAEL019408	53832.1	1.75183	0.218928	8.00185	1.22559e-15	8.10956e-13
AAEL004870	2763.76	3.49829	0.440864	7.93508	2.10361e-15	1.32233e-12
AAEL001307	3162.56	2.11105	0.272125	7.75764	8.65262e-15	5.18003e-12
AAEL009524	45.7743	-20.1251	2.61901	-7.68423	1.53914e-14	8.79549e-12
AAEL003100	6.43963	-19.0086	2.50973	-7.57397	3.61992e-14	1.97868e-11
AAEL006485	18.8233	-16.3237	2.1834	-7.4763	7.64443e-14	4.00441e-11
AAEL000406	2944.69	1.2694	0.177462	7.15311	8.48315e-13	4.26601e-10
AAEL025611	4364.96	1.1335	0.159907	7.08849	1.35582e-12	6.55591e-10
AAEL021557	3902.13	2.11754	0.300136	7.05526	1.72276e-12	8.02167e-10
AAEL013027	71.9945	17.4303	2.52962	6.89047	5.56084e-12	2.49682e-09
AAEL010235	20.808	-19.4726	2.83771	-6.86208	6.78661e-12	2.94211e-09
AAEL022079	118.221	3.14343	0.459752	6.83722	8.07428e-12	3.38366e-09
AAEL003886	645.784	1.785	0.266957	6.6865	2.2857e-11	9.00206e-09
AAEL021800	31.9631	2.28453	0.341681	6.68614	2.29133e-11	9.00206e-09
AAEL023591	5506.5	1.09983	0.164632	6.68057	2.38009e-11	9.06741e-09
AAEL010932	3431.8	3.69188	0.553999	6.66405	2.66383e-11	9.84992e-09
AAEL000709	19749.2	1.35753	0.206273	6.58123	4.66568e-11	1.67591e-08
AAEL013127	192844	3.70935	0.564688	6.56886	5.0702e-11	1.77063e-08
AAEL002130	3577.1	1.69659	0.261362	6.49135	8.50718e-11	2.8906e-08
AAEL026981	116908	4.53793	0.707491	6.41411	1.41649e-10	4.68634e-08
AAEL009166	183658	4.0277	0.636143	6.33144	2.42881e-10	7.82948e-08
AAEL019470	288247	3.8688	0.629904	6.14189	8.15477e-10	2.56304e-07
AAEL006904	7345.62	1.40938	0.229751	6.1344	8.54826e-10	2.62119e-07
AAEL001887	209317	1.67296	0.275023	6.08298	1.17966e-09	3.53113e-07
AAEL012702	96994.8	1.04142	0.171432	6.07483	1.24122e-09	3.62897e-07
AAEL001656	96717.6	2.00201	0.331313	6.04267	1.51588e-09	4.33127e-07
AAEL000793	16.9851	-19.4789	3.27412	-5.94934	2.69221e-09	7.52143e-07
AAEL000214	1414.74	0.624254	0.105588	5.91218	3.37619e-09	9.22727e-07
AAEL026331	80.4681	2.1664	0.367238	5.89917	3.65331e-09	9.77221e-07
AAEL006820	13738.5	0.834258	0.141891	5.87956	4.11368e-09	1.07744e-06
AAEL027222	53326.2	4.36128	0.745164	5.85278	4.83422e-09	1.24032e-06
AAEL012981	6.72252	21.5113	3.69456	5.82243	5.79985e-09	1.42972e-06
AAEL003229	7542.75	1.63569	0.280872	5.82361	5.75903e-09	1.42972e-06
AAEL023280	197.875	-1.04216	0.180831	-5.76319	8.2541e-09	1.99559e-06
AAEL000590	2908.86	-1.62885	0.283974	-5.7359	9.69969e-09	2.30084e-06
AAEL008336	579.191	-1.11188	0.194519	-5.71604	1.09033e-08	2.53845e-06
AAEL012443	3875.11	2.22456	0.390239	5.70052	1.19445e-08	2.7303e-06
AAEL012395	10484	3.78156	0.6715	5.63151	1.78635e-08	4.01036e-06
AAEL004974	653.561	1.75796	0.312848	5.61922	1.91825e-08	4.15796e-06
AAEL008468	1304.85	1.40808	0.250453	5.62214	1.88603e-08	4.15796e-06
AAEL026008	18172.6	1.59717	0.284417	5.61558	1.95906e-08	4.17445e-06
AAEL002583	228.093	1.42848	0.254594	5.6108	2.01389e-08	4.21977e-06
AAEL026025	176036	3.88663	0.693962	5.60063	2.13571e-08	4.40166e-06
AAEL008262	1016.02	-1.05354	0.191311	-5.50696	3.65073e-08	7.40274e-06
AAEL007595	3373.79	0.509362	0.092756	5.49141	3.98729e-08	7.95685e-06
AAEL000634	1636.43	0.804532	0.146653	5.48595	4.1126e-08	8.07869e-06
AAEL010435	109037	3.17639	0.584012	5.43892	5.36041e-08	1.03678e-05
AAEL007432	906924	3.60467	0.664904	5.42135	5.91521e-08	1.12676e-05
AAEL019537	6589.32	2.01236	0.371583	5.41565	6.10673e-08	1.14588e-05
AAEL024650	260.899	1.90219	0.351469	5.41211	6.22863e-08	1.15156e-05
AAEL007793	9.64335	22.1271	4.127	5.36154	8.25167e-08	1.50348e-05
AAEL000566	586.657	6.33756	1.18666	5.34069	9.2595e-08	1.66301e-05
AAEL014852	30.9561	-7.13841	1.34481	-5.3081	1.10775e-07	1.96149e-05
AAEL026855	206.256	2.14132	0.405916	5.27527	1.32564e-07	2.31471e-05
AAEL017334	536.441	6.93418	1.31702	5.26505	1.40148e-07	2.38101e-05
AAEL011578	3784.96	0.825421	0.156703	5.26743	1.38345e-07	2.38101e-05
AAEL024267	52041.4	1.14654	0.218433	5.24894	1.52977e-07	2.56431e-05
AAEL022280	437.719	-1.78792	0.342733	-5.21667	1.82166e-07	3.0134e-05
AAEL018334	343.126	-1.29057	0.248114	-5.20153	1.97654e-07	3.22714e-05
AAEL004329	2037.42	0.448695	0.0863044	5.19898	2.00388e-07	3.22985e-05
AAEL011158	7206.92	1.11054	0.213817	5.19388	2.05953e-07	3.27753e-05
AAEL020368	128.081	4.56733	0.885208	5.15962	2.47454e-07	3.88873e-05
AAEL019862	5708.89	1.92023	0.372622	5.15328	2.55963e-07	3.9728e-05
AAEL005216	513.22	-1.4486	0.282705	-5.12408	2.98995e-07	4.58411e-05
AAEL018333	123.711	-2.25934	0.442785	-5.10256	3.3509e-07	5.07561e-05
AAEL010404	6445.5	0.604517	0.118933	5.08285	3.71811e-07	5.49931e-05
AAEL015298	4989.56	0.840241	0.165287	5.08354	3.70467e-07	5.49931e-05
AAEL005961	4.937	38.0891	7.51334	5.06953	3.98799e-07	5.82989e-05
AAEL006381	303294	2.1235	0.421406	5.03908	4.67776e-07	6.75963e-05
AAEL004918	1792.4	1.15442	0.229573	5.02854	4.94216e-07	7.06055e-05
AAEL000599	67.096	-2.90021	0.579001	-5.00899	5.47175e-07	7.7293e-05
AAEL000544	6.89601	-33.6074	6.75914	-4.97214	6.62192e-07	9.25008e-05
AAEL020536	197.327	-0.973684	0.196642	-4.95154	7.36269e-07	0.000101718
AAEL008686	3838.95	0.731802	0.148681	4.92196	8.56808e-07	0.000117085
AAEL024516	4669.62	0.725169	0.147418	4.91913	8.69284e-07	0.000117512
AAEL026755	14.012	3.51123	0.717441	4.89409	9.87594e-07	0.000132085
AAEL004967	990.925	1.23291	0.252319	4.88632	1.02741e-06	0.000135964
AAEL012650	10.6293	21.6651	4.4427	4.87655	1.07957e-06	0.000141378
AAEL003645	47781	0.649639	0.133865	4.85294	1.21647e-06	0.000157664
AAEL009479	5566.43	5.70291	1.17676	4.8463	1.25788e-06	0.000159776
AAEL011980	11294.7	0.746192	0.153973	4.84625	1.25818e-06	0.000159776
AAEL024408	46.0883	6.51805	1.34837	4.83401	1.33808e-06	0.000168223
AAEL002721	3646.27	0.713234	0.147876	4.8232	1.41274e-06	0.000174127
AAEL022272	256.304	1.25487	0.260072	4.82508	1.3995e-06	0.000174127
AAEL003318	154763	1.1824	0.245438	4.81749	1.45375e-06	0.000177443
AAEL002102	4754.45	0.872233	0.181923	4.79451	1.63071e-06	0.000195251
AAEL009850	807.746	1.25299	0.261258	4.79597	1.61888e-06	0.000195251
AAEL013118	491501	2.63244	0.54934	4.79201	1.65119e-06	0.000195837
AAEL001839	6653.99	1.93788	0.405023	4.78462	1.71312e-06	0.000201284
AAEL014335	3624.32	0.714728	0.149486	4.78124	1.74218e-06	0.000202803
AAEL020147	940.615	0.986806	0.206764	4.77262	1.81843e-06	0.000209736
AAEL003462	785.628	1.40052	0.293627	4.76971	1.84495e-06	0.000210861
AAEL010344	376.447	-1.98227	0.416916	-4.7546	1.98839e-06	0.000225208
AAEL012151	707.398	-0.590254	0.124541	-4.73944	2.14311e-06	0.000240564
AAEL025509	563.146	0.4375	0.0928645	4.71117	2.46299e-06	0.000274024
AAEL011203	1953.51	1.40168	0.298477	4.69613	2.65141e-06	0.0002924
AAEL001190	4361.85	0.577381	0.123385	4.67953	2.87537e-06	0.00031434
AAEL010866	18.7051	-5.80654	1.24157	-4.67676	2.91446e-06	0.000315867
AAEL027229	818.387	3.23901	0.696062	4.65334	3.26601e-06	0.000350943
AAEL012700	4066.4	1.10593	0.238133	4.64417	3.41443e-06	0.000363781
AAEL005045	10015	1.6958	0.365402	4.64091	3.46883e-06	0.000366472
AAEL028921	12.0273	-23.1744	5.02656	-4.61039	4.01912e-06	0.000421069
AAEL007592	5491.43	1.34952	0.29525	4.57077	4.85938e-06	0.000504893
AAEL004131	2378.3	1.00831	0.221196	4.55844	5.15347e-06	0.000531061
AAEL000812	2020.68	1.0843	0.237959	4.55665	5.19768e-06	0.000531262
AAEL004335	37272.4	1.45952	0.320461	4.55445	5.25233e-06	0.000532519
AAEL009706	13590.1	0.643386	0.141401	4.55007	5.36273e-06	0.000539362
AAEL005535	1245.91	0.76204	0.169479	4.49638	6.91199e-06	0.000689663
AAEL010753	308.042	-0.71014	0.158603	-4.47746	7.55357e-06	0.000747744
AAEL012902	3.55133	18.3549	4.10138	4.4753	7.63048e-06	0.000749457
AAEL013492	353.864	-2.6525	0.59364	-4.46819	7.88838e-06	0.000768781
AAEL013327	185.703	-1.54735	0.347052	-4.45854	8.25188e-06	0.000798021
AAEL019650	202.216	-2.1212	0.478585	-4.43222	9.32683e-06	0.000895091
AAEL002413	189.885	-3.19159	0.720831	-4.42766	9.52607e-06	0.000907286
AAEL014433	364.979	1.39215	0.314826	4.42196	9.78103e-06	0.000924565
AAEL025743	7.96791	5.77713	1.30699	4.42017	9.86212e-06	0.000925273
AAEL003700	207.162	-0.96284	0.21896	-4.39733	1.09592e-05	0.00102058
AAEL006226	16010.2	0.985668	0.224951	4.38169	1.17762e-05	0.0010886
AAEL008789	1322.5	-0.663771	0.151712	-4.37521	1.21317e-05	0.00111328
AAEL008564	6068.43	-0.469317	0.107425	-4.36878	1.24941e-05	0.00113823
AAEL009085	7199.83	0.427554	0.0979253	4.36613	1.26468e-05	0.00114385
AAEL009918	349.356	-0.739022	0.169528	-4.3593	1.30481e-05	0.00116656
AAEL027429	833.595	0.83177	0.19083	4.3587	1.30835e-05	0.00116656
AAEL022692	409.565	-0.855323	0.196438	-4.35416	1.33576e-05	0.00117435
AAEL005665	134.733	-2.79437	0.641586	-4.3554	1.32823e-05	0.00117435
AAEL008206	314.791	7.29513	1.67994	4.3425	1.40873e-05	0.0012299
AAEL015136	19377.3	1.66376	0.383807	4.33489	1.45832e-05	0.00126441
AAEL014635	65.9988	-2.32808	0.538841	-4.32053	1.55654e-05	0.00134033
AAEL004805	86.6493	5.20064	1.20531	4.31477	1.59768e-05	0.0013664
AAEL011901	5552.23	0.874237	0.203731	4.29114	1.77761e-05	0.00149989
AAEL004553	3275.87	0.660856	0.154005	4.29113	1.77762e-05	0.00149989
AAEL028803	48.4976	-4.58652	1.07173	-4.27956	1.87264e-05	0.00156952
AAEL009154	3998.65	0.516989	0.120853	4.27784	1.88713e-05	0.00157119
AAEL021813	6399.31	-0.698246	0.163538	-4.26962	1.95808e-05	0.00161024
AAEL008210	3337.38	0.812415	0.190286	4.26944	1.95965e-05	0.00161024
AAEL002412	2737.24	0.969502	0.227517	4.26123	2.03301e-05	0.00165968
AAEL003656	38.8329	-2.97712	0.699678	-4.25499	2.09054e-05	0.00169563
AAEL007058	158.525	-0.829727	0.195833	-4.2369	2.26624e-05	0.00182636
AAEL008693	10764.5	0.976886	0.230658	4.23521	2.28334e-05	0.00182842
AAEL022623	12728.5	1.08398	0.256329	4.22884	2.34894e-05	0.00186904
AAEL005985	9883.3	-0.814262	0.192655	-4.22652	2.3733e-05	0.00187655
AAEL009317	22559.2	0.381194	0.0902518	4.22368	2.4035e-05	0.00188855
AAEL007060	1403.33	1.11772	0.265865	4.20408	2.62141e-05	0.00204698
AAEL013228	110.069	-1.60975	0.383861	-4.19357	2.74595e-05	0.002131
AAEL007403	9229.65	0.481325	0.115401	4.1709	3.03393e-05	0.00234003
AAEL003657	153.709	-0.897694	0.216453	-4.14729	3.36438e-05	0.00257908
AAEL011891	643.842	3.80765	0.918821	4.14406	3.41211e-05	0.00259982
AAEL022593	355.272	0.809143	0.196206	4.12394	3.72445e-05	0.00282071
AAEL002312	609.391	-0.697613	0.169932	-4.10526	4.03866e-05	0.00304036
AAEL008105	6878.08	1.03712	0.252783	4.10282	4.08149e-05	0.00305431
AAEL000636	34.2509	-4.10936	1.00261	-4.09866	4.15551e-05	0.0030913
AAEL007397	5761.83	1.02777	0.252866	4.06447	4.8142e-05	0.00353942
AAEL021847	20.6942	-3.22187	0.792516	-4.06537	4.7956e-05	0.00353942
AAEL022118	751.393	0.591763	0.146025	4.05247	5.06789e-05	0.00370427
AAEL007238	2951.34	0.827006	0.204952	4.03512	5.45736e-05	0.0039431
AAEL005510	578.942	0.619076	0.153389	4.03599	5.43731e-05	0.0039431
AAEL010596	2358.11	1.25057	0.310555	4.0269	5.65178e-05	0.00406024
AAEL027674	16190.9	0.98137	0.243955	4.02275	5.7523e-05	0.00408576
AAEL006838	188.532	-0.83201	0.206773	-4.02378	5.72703e-05	0.00408576
AAEL008622	171.794	2.08558	0.520392	4.00771	6.13101e-05	0.00433028
AAEL000931	515.731	1.94126	0.484846	4.00388	6.23131e-05	0.00437654
AAEL007601	123585	2.57678	0.644058	4.00085	6.31161e-05	0.00440831
AAEL014273	5007.58	0.521287	0.13039	3.99792	6.39027e-05	0.00443553
AAEL004522	34413.4	-0.677045	0.169398	-3.99677	6.42114e-05	0.00443553
AAEL005491	131.808	-2.22688	0.55785	-3.9919	6.55457e-05	0.00450295
AAEL005793	57.8063	-2.78966	0.699105	-3.99033	6.59809e-05	0.00450822
AAEL011732	1842.15	-0.453629	0.113897	-3.98281	6.81056e-05	0.00462823
AAEL010270	71.4222	3.80132	0.954836	3.98113	6.85889e-05	0.00463602
AAEL009165	187126	2.05443	0.516484	3.97773	6.95776e-05	0.00467769
AAEL019526	115.491	-2.2121	0.556366	-3.97597	7.00918e-05	0.00468439
AAEL001855	374.31	1.47539	0.37118	3.97485	7.04224e-05	0.00468439
AAEL007374	48.6013	-1.82478	0.459365	-3.97239	7.11547e-05	0.00468738
AAEL009681	3963.4	0.690607	0.17386	3.9722	7.12131e-05	0.00468738
AAEL002615	2954.09	0.525034	0.132229	3.97064	7.16813e-05	0.00469363
AAEL025109	1975.37	1.57922	0.3991	3.95695	7.59126e-05	0.00494494
AAEL006836	707.91	0.547308	0.138709	3.94573	7.95571e-05	0.00512919
AAEL021870	196.077	-1.29721	0.328734	-3.94607	7.94454e-05	0.00512919
AAEL008211	911.524	0.617616	0.156653	3.94258	8.06099e-05	0.00517055
AAEL010739	129.482	-1.59385	0.405136	-3.93412	8.35028e-05	0.00532892
AAEL017356	1432.76	1.48961	0.378902	3.93139	8.44564e-05	0.00536256
AAEL023434	116.452	2.57309	0.655511	3.92533	8.66123e-05	0.00547181
AAEL008858	33.9973	4.33909	1.11008	3.90881	9.27509e-05	0.00583032
AAEL006870	3688.68	0.837667	0.214414	3.90677	9.35382e-05	0.00585056
AAEL021447	190.51	1.42627	0.365284	3.90455	9.44015e-05	0.00587533
AAEL009965	315.426	4.97848	1.27759	3.89679	9.7476e-05	0.00603679
AAEL010516	1375.51	0.369357	0.0953403	3.87409	0.000107022	0.00659548
AAEL013374	159.503	-0.80611	0.208423	-3.86766	0.000109883	0.00672829
AAEL007092	10569.9	0.572017	0.147928	3.86686	0.000110247	0.00672829
AAEL014843	48096.2	1.21432	0.314375	3.86265	0.000112163	0.00681215
AAEL024784	265.348	-2.18461	0.566143	-3.85876	0.000113962	0.00688813
AAEL009531	28780.1	0.860974	0.22344	3.85327	0.00011655	0.00701087
AAEL006028	53.0612	-2.82866	0.736169	-3.84241	0.000121833	0.00729375
AAEL026088	498.624	0.871953	0.227142	3.8388	0.000123636	0.00733187
AAEL013229	6699.69	0.875118	0.227935	3.83934	0.000123368	0.00733187
AAEL012636	3690.93	0.827975	0.215855	3.83579	0.000125161	0.00738744
AAEL001151	8112.67	0.727382	0.190672	3.81484	0.000136274	0.00795085
AAEL006181	8012.1	1.2074	0.316629	3.8133	0.000137125	0.00795085
AAEL005531	746.204	-1.05841	0.277325	-3.8165	0.000135356	0.00795085
AAEL014426	165.109	-2.22003	0.582303	-3.8125	0.000137566	0.00795085
AAEL000080	42360	1.80831	0.474377	3.81196	0.000137869	0.00795085
AAEL012425	204.28	-2.48698	0.652978	-3.80867	0.000139716	0.00802058
AAEL008936	16.5886	-6.78069	1.78209	-3.80492	0.000141851	0.00810615
AAEL007064	8.26399	-16.8709	4.4376	-3.8018	0.000143648	0.00817166
AAEL026287	42.8802	-2.71024	0.713403	-3.79904	0.00014526	0.00822618
AAEL020340	16933.7	-1.10936	0.292673	-3.79043	0.000150388	0.00847836
AAEL013656	326.03	-1.13827	0.300934	-3.78245	0.000155289	0.00871562
AAEL003977	47.2272	-2.70893	0.716508	-3.78073	0.000156366	0.00873704
AAEL000024	78.0176	-3.57334	0.945914	-3.77766	0.000158308	0.00880639
AAEL019742	1101.36	0.649772	0.173063	3.75454	0.00017366	0.00961788
AAEL024223	12.2888	-5.32471	1.42079	-3.74772	0.000178452	0.00983989
AAEL013870	154.275	-0.918584	0.245254	-3.74544	0.00018008	0.00988632
AAEL007328	1216.46	-0.356578	0.0955389	-3.73228	0.000189752	0.010372
AAEL026894	3864.51	0.338096	0.0906568	3.72941	0.000191929	0.0104456
AAEL007703	191.454	4.46885	1.19908	3.72691	0.000193845	0.0105044
AAEL002918	404.526	0.817783	0.219755	3.72133	0.000198173	0.0106928
AAEL005903	1789.84	1.81371	0.487763	3.71842	0.000200473	0.0107707
AAEL019661	258.484	0.600312	0.161769	3.71092	0.000206506	0.0110476
AAEL007942	12477.6	-0.783366	0.212289	-3.69009	0.000224173	0.0119419
AAEL028668	2958.66	-1.55736	0.422163	-3.689	0.000225137	0.0119427
AAEL024147	410.288	-1.92121	0.522914	-3.67405	0.000238738	0.012611
AAEL001308	85.0228	-1.74473	0.475297	-3.67081	0.00024178	0.0127182
AAEL000883	3125.61	0.469415	0.128352	3.65724	0.000254946	0.0133549
AAEL022720	193.031	-1.00272	0.274327	-3.65521	0.000256977	0.0134054
AAEL026564	2808.02	-0.557705	0.152861	-3.64845	0.000263824	0.0137058
AAEL002467	574033	1.76224	0.483404	3.64549	0.000266883	0.0138076
AAEL024406	104.751	-1.72407	0.473269	-3.64289	0.000269591	0.0138906
AAEL008906	927.57	0.563315	0.154681	3.64178	0.00027076	0.0138938
AAEL008718	1145.77	0.345827	0.0953547	3.62674	0.000287019	0.0146683
AAEL022933	474.171	0.514366	0.141891	3.62508	0.000288875	0.0147034
AAEL005822	10803.4	0.529569	0.146157	3.62328	0.000290886	0.0147461
AAEL003374	123.163	-0.911044	0.251918	-3.61643	0.000298699	0.0150788
AAEL009328	14.2777	-5.46422	1.51136	-3.61543	0.000299849	0.0150788
AAEL028790	77.7727	-3.50568	0.96992	-3.6144	0.000301048	0.0150788
AAEL011564	6267.64	0.772125	0.213726	3.61269	0.000303037	0.0151182
AAEL009722	263.716	-1.61977	0.448777	-3.6093	0.000307027	0.0152567
AAEL017513	866.612	-0.664482	0.184158	-3.60822	0.0003083	0.0152596
AAEL008497	2139.26	0.570645	0.158563	3.59886	0.000319615	0.0157576
AAEL005026	785.617	1.50096	0.417646	3.59386	0.000325812	0.0160004
AAEL001626	7382.13	0.693785	0.193334	3.58853	0.000332549	0.0162677
AAEL026574	124.982	-0.985512	0.274836	-3.58581	0.00033603	0.0163743
AAEL006634	7542.04	0.787833	0.219825	3.5839	0.000338496	0.0164308
AAEL004097	376.318	-0.977155	0.272797	-3.58199	0.000340991	0.0164882
AAEL019045	323.124	-2.62797	0.735195	-3.57452	0.000350867	0.0169008
AAEL006370	611.911	0.492895	0.138232	3.56571	0.000362879	0.0174126
AAEL023521	19449.1	0.646992	0.181663	3.56149	0.000368753	0.0175605
AAEL018131	133.389	-1.71958	0.482726	-3.56224	0.000367706	0.0175605
AAEL029037	183.098	3.55936	1.00185	3.55277	0.000381199	0.0180846
AAEL015493	1147.21	0.484686	0.13662	3.5477	0.00038861	0.0183669
AAEL017116	27151.4	0.25911	0.0732113	3.5392	0.000401337	0.0188974
AAEL015116	86.4915	-2.9314	0.829525	-3.53382	0.000409593	0.0192142
AAEL019334	2556.23	-2.7806	0.78906	-3.52394	0.000425185	0.0198715
AAEL007218	113.666	-1.71226	0.486186	-3.52181	0.000428606	0.0199572
AAEL010202	769662	1.65728	0.470913	3.5193	0.000432692	0.0200731
AAEL027353	68.3322	-0.950124	0.270497	-3.51252	0.000443882	0.0205165
AAEL014274	258.392	-0.771138	0.219919	-3.50646	0.000454103	0.020912
AAEL001143	67.3855	-3.98632	1.13783	-3.50346	0.000459259	0.0209196
AAEL001969	1431.48	-1.60003	0.456634	-3.50396	0.000458395	0.0209196
AAEL007090	8546.37	1.275	0.363769	3.50497	0.00045666	0.0209196
AAEL012311	74.2466	-1.63379	0.46843	-3.48779	0.000487022	0.0221041
AAEL004892	520.526	-0.466747	0.134001	-3.48315	0.000495558	0.0224106
AAEL010679	363.814	-0.922575	0.265838	-3.47044	0.000519605	0.0234139
AAEL028682	3401.68	-1.30106	0.375174	-3.4679	0.00052455	0.0234685
AAEL028794	2843.29	-2.69424	0.776887	-3.46799	0.000524359	0.0234685
AAEL004213	17.9055	7.30095	2.10829	3.46298	0.000534232	0.0238169
AAEL023543	1565.35	0.35058	0.101309	3.46049	0.000539185	0.0238351
AAEL028742	3413.38	-1.31011	0.37865	-3.45995	0.000540283	0.0238351
AAEL013894	101.416	-1.70392	0.492604	-3.459	0.000542175	0.0238351
AAEL005339	2988.85	0.38086	0.110108	3.45898	0.000542224	0.0238351
AAEL019658	199.476	-1.10729	0.320475	-3.45516	0.000549965	0.0240911
AAEL011763	77.1354	-3.88713	1.12679	-3.44974	0.000561118	0.0243463
AAEL003419	43.3444	-2.0383	0.590885	-3.44958	0.000561468	0.0243463
AAEL011663	6633.51	0.495782	0.143803	3.44766	0.000565472	0.0243463
AAEL028653	6281.03	-2.60771	0.755984	-3.44942	0.000561795	0.0243463
AAEL000405	297.047	-0.909918	0.263906	-3.44789	0.000564988	0.0243463
AAEL005423	690.283	-0.485888	0.14113	-3.44284	0.000575639	0.024694
AAEL006535	27.4856	-2.46945	0.717451	-3.44198	0.000577476	0.024694
AAEL003133	58.3094	-1.48293	0.432542	-3.4284	0.000607157	0.0257009
AAEL003006	4599.94	0.495208	0.144409	3.4292	0.000605356	0.0257009
AAEL019868	1116.86	-0.994735	0.290038	-3.42967	0.000604316	0.0257009
AAEL028665	13.6979	2.55425	0.745933	3.42424	0.000616531	0.0258422
AAEL023742	917.829	1.27455	0.372221	3.42418	0.000616662	0.0258422
AAEL006476	3617.17	-0.503521	0.147026	-3.42472	0.000615439	0.0258422
AAEL007296	75.0732	-2.24976	0.657236	-3.42306	0.000619214	0.025863
AAEL013825	1667.78	0.365134	0.106785	3.41935	0.000627716	0.0259613
AAEL028862	3946.95	-1.18542	0.346682	-3.41933	0.000627763	0.0259613
AAEL008721	222.709	-0.6932	0.202633	-3.42096	0.00062401	0.0259613
AAEL015140	32.6475	5.31691	1.55824	3.41213	0.000644576	0.0263961
AAEL019468	188.497	-2.14001	0.627057	-3.41278	0.000643029	0.0263961
AAEL028782	5883.44	-2.52619	0.74005	-3.41354	0.000641247	0.0263961
AAEL008826	10.896	-5.40074	1.58492	-3.40757	0.000655431	0.0267122
AAEL001105	551.48	-0.681661	0.20007	-3.40711	0.000656545	0.0267122
AAEL000316	11.404	-5.83187	1.71505	-3.4004	0.000672868	0.0272881
AAEL005428	58259.3	0.848027	0.249559	3.3981	0.000678565	0.0274306
AAEL021836	2047.66	-0.533924	0.157326	-3.39375	0.000689437	0.0277808
AAEL017451	58.0959	-3.49231	1.0304	-3.38926	0.000700808	0.0281414
AAEL015356	113.672	-0.87003	0.256763	-3.38846	0.000702862	0.0281414
AAEL009111	580.68	2.74986	0.812412	3.38481	0.00071227	0.0284275
AAEL028730	42387.4	-2.56183	0.757821	-3.38052	0.000723495	0.0287841
AAEL025969	462.817	-0.48584	0.143848	-3.37745	0.000731617	0.0290154
AAEL004713	9.63068	-5.59403	1.65705	-3.3759	0.000735737	0.0290199
AAEL010877	162.186	-0.95459	0.282785	-3.37568	0.000736346	0.0290199
AAEL024534	5.82436	-6.13045	1.81916	-3.36994	0.000751835	0.0295377
AAEL017300	49.7082	-1.86612	0.553904	-3.36904	0.000754314	0.0295428
AAEL028739	50853.9	-2.51425	0.74691	-3.3662	0.000762118	0.0297557
AAEL002805	1490.88	0.375928	0.111751	3.36397	0.000768293	0.029904
AAEL013541	2396.31	0.248116	0.0738029	3.36187	0.000774172	0.0300398
AAEL007889	408.613	-0.77877	0.232106	-3.35523	0.000792994	0.030225
AAEL018042	452.752	-0.658374	0.19628	-3.35426	0.000795774	0.030225
AAEL004477	1132.49	0.384656	0.114549	3.358	0.000785078	0.030225
AAEL005992	1999.78	1.14086	0.339961	3.35585	0.000791227	0.030225
AAEL020057	57.2597	-1.67316	0.498071	-3.35927	0.00078148	0.030225
AAEL005575	7.54948	-5.54062	1.65147	-3.35497	0.000793728	0.030225
AAEL028731	77015.7	-2.62981	0.783267	-3.35749	0.000786545	0.030225
AAEL017059	1880.18	0.420677	0.125461	3.35305	0.000799273	0.0302664
AAEL028771	162334	-2.55749	0.762935	-3.35217	0.000801812	0.0302714
AAEL005375	34.6496	-1.41188	0.421402	-3.35044	0.000806843	0.0303702
AAEL020904	21.5825	3.78585	1.13088	3.3477	0.000814839	0.0305796
AAEL005445	144.238	-0.82944	0.247887	-3.34604	0.000819756	0.0306725
AAEL006644	1206.39	-0.562032	0.168182	-3.34181	0.000832345	0.0310511
AAEL024257	345.396	3.90515	1.17121	3.33429	0.000855182	0.0318087
AAEL003157	996.495	0.324751	0.0975182	3.33016	0.000867972	0.0321892
AAEL009766	1077.42	0.434339	0.130686	3.32352	0.000888896	0.0328682
AAEL026845	9.74711	-7.46477	2.25572	-3.30926	0.000935443	0.0340881
AAEL028996	147193	-2.52653	0.763438	-3.30941	0.000934915	0.0340881
AAEL020502	268.578	-0.852633	0.257456	-3.31176	0.000927119	0.0340881
AAEL000857	693.161	-0.538788	0.162793	-3.30964	0.000934147	0.0340881
AAEL009765	991.033	0.850624	0.256875	3.31143	0.000928208	0.0340881
AAEL025585	9.96404	-5.2144	1.57763	-3.30521	0.00094906	0.0344843
AAEL028967	13316.4	-2.6581	0.804441	-3.30428	0.00095219	0.0344984
AAEL013936	294.69	-0.913597	0.276969	-3.29856	0.000971836	0.035109
AAEL017455	2108.62	-0.5442	0.165146	-3.29527	0.000983262	0.03542
AAEL028657	1918.7	-2.44546	0.742318	-3.29435	0.000986498	0.035435
AAEL028740	101400	-2.44268	0.741702	-3.29334	0.000990035	0.0354608
AAEL020823	165.428	-1.10705	0.337313	-3.28196	0.00103089	0.036819
AAEL002851	48959	0.611025	0.186273	3.28027	0.00103709	0.0369356
AAEL004513	2391.76	-0.84924	0.25904	-3.27842	0.00104392	0.0370738
AAEL014141	50.5477	-1.63616	0.499612	-3.27487	0.00105711	0.0374366
AAEL004950	244.305	-0.522391	0.159887	-3.26726	0.00108595	0.0383498
AAEL009195	1101.24	0.908831	0.278299	3.26567	0.00109206	0.0384312
AAEL012827	43676.6	0.595633	0.182426	3.26507	0.00109437	0.0384312
AAEL010283	240.239	-0.635651	0.195018	-3.25944	0.00111632	0.0390931
AAEL013065	1279.42	0.614093	0.1885	3.25779	0.00112285	0.0392125
AAEL012117	4257.3	-0.496499	0.152726	-3.25091	0.00115035	0.0400615
AAEL003008	410.932	-0.597986	0.18423	-3.24586	0.00117096	0.0405312
AAEL004169	1678.82	0.863794	0.266172	3.24524	0.00117351	0.0405312
AAEL028980	13.3822	2.14743	0.661492	3.24634	0.00116898	0.0405312
AAEL019332	157381	-2.39204	0.737605	-3.24299	0.00118283	0.040741
AAEL018055	1445.44	-0.40549	0.125135	-3.24041	0.00119357	0.0409989
AAEL008635	7272.4	1.02935	0.318176	3.23517	0.00121572	0.0416459
AAEL022977	1311.05	-0.579299	0.179186	-3.23295	0.00122517	0.0418555
AAEL013324	60.8417	-2.44152	0.756928	-3.22556	0.00125726	0.0428356
AAEL001255	1391.57	0.338344	0.104955	3.22372	0.00126539	0.0429958
AAEL009513	6.0346	-7.00884	2.175	-3.22246	0.00127097	0.0430689
AAEL026652	905.317	-0.419952	0.130421	-3.21998	0.00128199	0.0433256
AAEL013875	56298.7	0.414912	0.128961	3.21735	0.00129382	0.0435152
AAEL004117	2357.6	-0.330691	0.102789	-3.21719	0.00129452	0.0435152
AAEL007711	9.20289	-5.23802	1.62952	-3.21446	0.0013069	0.0438143
AAEL008266	2118.56	-0.436285	0.135759	-3.21368	0.00131045	0.0438166
AAEL028689	30.2353	-3.03064	0.943865	-3.21089	0.00132326	0.0441274
AAEL020388	8.21193	-4.47316	1.39383	-3.20925	0.00133082	0.0442621
AAEL028938	54436	-2.65202	0.826643	-3.20818	0.00133578	0.0443097
AAEL027029	1103.31	0.363173	0.113243	3.20701	0.00134121	0.0443728
AAEL011389	952.936	0.433742	0.135375	3.20401	0.00135527	0.0446408
AAEL012679	533.539	1.16693	0.364235	3.20377	0.00135641	0.0446408
AAEL019674	311.65	-0.800616	0.250129	-3.20081	0.0013704	0.0449833
AAEL019698	212.135	-1.46802	0.459225	-3.19674	0.00138992	0.0455053
AAEL025238	818.846	0.656863	0.205817	3.19148	0.00141544	0.0462206
AAEL009764	13743.6	0.597967	0.187496	3.18923	0.00142654	0.0464623
AAEL021027	75.528	4.4894	1.40933	3.1855	0.00144506	0.0469438
AAEL028663	10003.7	-2.36182	0.742553	-3.18068	0.00146929	0.0476081
AAEL019333	48599.2	-2.66967	0.839646	-3.17952	0.00147521	0.047677
AAEL014366	315.522	-0.631362	0.198785	-3.1761	0.00149271	0.048119
AAEL006467	47.6605	2.48865	0.783856	3.17488	0.00149898	0.0481974
AAEL008406	8991.07	0.522454	0.165136	3.16378	0.00155736	0.0499468
AAEL010681	847.484	-0.542439	0.171786	-3.15764	0.00159052	0.0508805
AAEL011819	605.851	0.357136	0.113213	3.15455	0.00160748	0.0512925
AAEL025514	718.941	-0.867694	0.275439	-3.15022	0.00163146	0.0519257
AAEL000428	29674.8	0.385115	0.122341	3.14788	0.00164458	0.0519487
AAEL009629	161.257	-1.24521	0.395427	-3.14903	0.00163814	0.0519487
AAEL008159	1748.3	-0.595223	0.189064	-3.14826	0.00164248	0.0519487
AAEL019725	983.033	-0.854831	0.271749	-3.14567	0.00165707	0.0521585
AAEL011750	7760.95	0.242188	0.0770015	3.14524	0.00165951	0.0521585
AAEL009074	49460.1	0.601462	0.19147	3.14128	0.00168209	0.0527363
AAEL019445	1349.74	-0.547399	0.174437	-3.13809	0.00170056	0.0531825
AAEL011982	5877.29	0.326566	0.104137	3.13594	0.00171306	0.0534408
AAEL006180	478.649	-0.69769	0.222675	-3.13322	0.00172898	0.0537324
AAEL007862	519.451	-0.398811	0.127298	-3.13289	0.00173096	0.0537324
AAEL022219	637.613	0.866555	0.277375	3.12412	0.00178336	0.0548272
AAEL028659	9819.06	-2.39868	0.767807	-3.12407	0.00178367	0.0548272
AAEL000967	3630.4	0.887521	0.284047	3.12456	0.00178074	0.0548272
AAEL017258	3019.5	0.446504	0.142835	3.12602	0.00177188	0.0548272
AAEL027927	6.7295	-5.55759	1.78038	-3.12158	0.00179881	0.0551576
AAEL010945	1370.97	0.397429	0.127436	3.11865	0.00181679	0.0555733
AAEL010835	2262.38	0.495951	0.159098	3.11727	0.00182537	0.0557005
AAEL004488	512.947	0.488214	0.156664	3.11632	0.00183124	0.0557442
AAEL002107	10628.6	0.746542	0.239644	3.11521	0.00183814	0.0557538
AAEL011325	8.12806	-5.76858	1.85196	-3.11484	0.00184043	0.0557538
AAEL021012	7.71002	-5.46849	1.75838	-3.10995	0.00187119	0.056414
AAEL013072	1860.85	0.565228	0.181741	3.11007	0.00187041	0.056414
AAEL008161	212.387	-0.641566	0.206354	-3.10905	0.00187689	0.0564504
AAEL019668	1362.71	0.418037	0.134576	3.10634	0.0018942	0.0568351
AAEL012370	44.8428	-1.79499	0.580174	-3.09388	0.00197558	0.0588555
AAEL009680	38538.6	-0.57382	0.185446	-3.09426	0.00197301	0.0588555
AAEL013715	241439	1.69877	0.548915	3.09477	0.00196966	0.0588555
AAEL024022	921.627	-0.557384	0.180463	-3.08863	0.00201079	0.0594816
AAEL027985	5743.54	-0.542499	0.175621	-3.08904	0.00200808	0.0594816
AAEL020579	25.5214	-4.7446	1.53601	-3.08891	0.00200893	0.0594816
AAEL013119	3226.14	0.38434	0.124788	3.07993	0.00207046	0.0609599
AAEL003243	18.7789	-2.91308	0.945799	-3.08002	0.00206984	0.0609599
AAEL019691	508.237	-1.80388	0.585963	-3.07849	0.00208052	0.0611128
AAEL008242	1138.86	-0.463601	0.150762	-3.07506	0.00210461	0.0615555
AAEL005655	3170.27	0.461376	0.150044	3.07495	0.00210538	0.0615555
AAEL011638	74.7285	-1.20314	0.391617	-3.07223	0.00212468	0.0619755
AAEL024714	113.103	-0.779043	0.253778	-3.06978	0.00214215	0.0623405
AAEL008684	132.298	-0.879408	0.286685	-3.06751	0.00215853	0.0626721
AAEL011553	526.429	-1.19814	0.391041	-3.06397	0.00218424	0.0632724
AAEL000687	6291.14	0.371394	0.121424	3.05864	0.00222343	0.0641122
AAEL013990	33.3847	-1.6282	0.53223	-3.05921	0.00221925	0.0641122
AAEL020464	26.3671	-1.37221	0.448771	-3.05771	0.00223032	0.0641638
AAEL000786	30.7051	-3.79066	1.24103	-3.05445	0.00225476	0.0647187
AAEL001959	12045.6	-0.42584	0.139498	-3.05266	0.00226825	0.0649577
AAEL027504	13109.3	0.556107	0.182229	3.0517	0.00227552	0.0650179
AAEL004509	1952.54	0.455406	0.149302	3.05022	0.00228671	0.0651893
AAEL009645	24273	0.4287	0.140707	3.04675	0.00231328	0.0657977
AAEL002104	197.916	-0.635221	0.208969	-3.03979	0.00236744	0.0667343
AAEL027817	296.435	0.543134	0.178639	3.0404	0.00236265	0.0667343
AAEL021372	61120	-1.08649	0.357327	-3.0406	0.00236105	0.0667343
AAEL004188	11607.8	-0.824425	0.271104	-3.04099	0.00235799	0.0667343
AAEL012137	471.279	-0.428627	0.141213	-3.03532	0.00240283	0.0675802
AAEL024043	5.01293	-4.72045	1.55633	-3.03307	0.00242081	0.067934
AAEL001794	93.2321	-2.24959	0.741877	-3.03229	0.00242704	0.0679571
AAEL004466	67.4336	1.35391	0.44678	3.03037	0.00244251	0.0681144
AAEL026215	70492.5	0.461053	0.15215	3.03025	0.00244349	0.0681144
AAEL019388	875.994	-2.02691	0.669109	-3.02927	0.00245148	0.0681859
AAEL020636	379.306	-0.666508	0.220076	-3.02853	0.00245744	0.0682008
AAEL015307	6.66906	-5.3052	1.7536	-3.02531	0.00248378	0.06878
AAEL007659	245.966	-1.46495	0.48438	-3.02437	0.00249151	0.0688424
AAEL014551	31.895	-3.44876	1.1419	-3.0202	0.00252604	0.0696434
AAEL009090	96.4235	-1.07902	0.358468	-3.01009	0.00261174	0.0718485
AAEL014564	2674.14	0.28438	0.0945647	3.00725	0.00263624	0.0723642
AAEL028675	718.076	-2.02649	0.67413	-3.00609	0.00264634	0.0724832
AAEL021555	13.9994	7.82564	2.60548	3.00353	0.00266865	0.0729354
AAEL004802	2228.73	0.342281	0.114062	3.00083	0.00269249	0.0731291
AAEL026256	500.033	0.69254	0.23084	3.00009	0.00269901	0.0731291
AAEL003478	132.077	-0.779275	0.259739	-3.00022	0.00269784	0.0731291
AAEL024370	21.428	-2.38287	0.79406	-3.00087	0.00269211	0.0731291
AAEL023221	183.168	-0.52888	0.176387	-2.9984	0.002714	0.0733772
AAEL027562	524.216	0.909161	0.303335	2.99722	0.00272453	0.0733898
AAEL007446	80.4028	-0.708703	0.236468	-2.99704	0.00272614	0.0733898
AAEL004297	15545.4	0.476233	0.159037	2.99448	0.00274912	0.0738502
AAEL003680	791.306	-0.43886	0.146659	-2.99238	0.00276814	0.0741437
AAEL005803	146.128	-0.945247	0.315928	-2.99197	0.00277184	0.0741437
AAEL003302	276.642	6.37783	2.13366	2.98915	0.00279756	0.0746728
AAEL013070	199.485	0.910176	0.304599	2.98811	0.00280709	0.0747684
AAEL005956	2680.58	0.289285	0.0968871	2.9858	0.0028284	0.0751768
AAEL002757	354.616	0.899882	0.30155	2.98418	0.00284337	0.0754152
AAEL006452	264.412	-0.55228	0.185328	-2.98001	0.00288238	0.076049
AAEL007796	57.5514	-2.12557	0.713192	-2.98037	0.00287903	0.076049
AAEL019387	985.572	-2.02413	0.679308	-2.97969	0.00288541	0.076049
AAEL010944	29.443	-2.37273	0.797006	-2.97705	0.00291037	0.0765463
AAEL000196	13.5948	6.43811	2.16519	2.97346	0.00294465	0.0771253
AAEL004022	64.6388	-2.26221	0.7608	-2.97346	0.00294459	0.0771253
AAEL019686	211.083	-1.1172	0.375839	-2.97255	0.00295336	0.0771926
AAEL019576	108.135	-1.03636	0.348821	-2.97104	0.00296792	0.0774123
AAEL027215	11.2951	-5.229	1.76119	-2.96902	0.00298755	0.0776226
AAEL007642	1433.79	0.570068	0.192011	2.96894	0.00298833	0.0776226
AAEL010148	3658.75	-0.379686	0.127948	-2.96751	0.00300224	0.0778229
AAEL006314	2199.41	0.973431	0.32876	2.96091	0.00306728	0.0793453
AAEL019044	90.5575	-2.95316	0.998206	-2.95847	0.00309171	0.0794486
AAEL002816	737.03	0.646929	0.218611	2.95927	0.00308365	0.0794486
AAEL006248	28.0039	-2.06916	0.699516	-2.95799	0.00309655	0.0794486
AAEL004283	330.773	-0.710764	0.240252	-2.95841	0.00309234	0.0794486
AAEL010302	334.194	-0.416754	0.141107	-2.95345	0.00314239	0.0797875
AAEL026602	13291.4	0.720701	0.244173	2.9516	0.00316135	0.0797875
AAEL006830	12.532	-5.9326	2.01075	-2.95044	0.00317322	0.0797875
AAEL010222	228.926	1.01089	0.342077	2.95516	0.00312507	0.0797875
AAEL008366	1800.58	0.370585	0.125557	2.95153	0.00316209	0.0797875
AAEL022986	2.44602	22.2676	7.547	2.95052	0.00317238	0.0797875
AAEL010073	2595.58	-0.267614	0.0905752	-2.95461	0.00313065	0.0797875
AAEL008037	198.434	-0.563199	0.190746	-2.95261	0.003151	0.0797875
AAEL019582	4206.06	0.454084	0.15363	2.95569	0.00311969	0.0797875
AAEL022184	34.5015	-1.48578	0.503505	-2.95087	0.00316879	0.0797875
AAEL004409	1355.44	-0.560933	0.190392	-2.9462	0.00321708	0.0807288
AAEL007872	2930.87	-1.07876	0.366399	-2.94422	0.00323767	0.0810837
AAEL000650	34.8683	-2.37405	0.80863	-2.93589	0.00332588	0.082798
AAEL002600	110.172	-1.95418	0.665404	-2.93683	0.00331584	0.082798
AAEL005646	710.747	0.553464	0.188513	2.93595	0.00332533	0.082798
AAEL019644	618.073	-0.564924	0.1925	-2.93467	0.00333904	0.0829612
AAEL000425	177.945	-0.624055	0.21309	-2.9286	0.00340493	0.0844316
AAEL006439	284.921	-0.641944	0.219518	-2.92433	0.00345202	0.0852628
AAEL028952	29.4737	-2.53744	0.867635	-2.92455	0.00344955	0.0852628
AAEL018151	3143.03	-0.282154	0.0965439	-2.92255	0.00347182	0.0855839
AAEL010388	434.474	0.413726	0.141643	2.9209	0.00349023	0.0858692
AAEL001100	87007.7	1.41352	0.484152	2.91958	0.00350498	0.0860636
AAEL026027	213.484	-0.833055	0.285485	-2.91803	0.00352245	0.0863241
AAEL001965	284.757	-0.74036	0.253906	-2.91588	0.00354682	0.0867521
AAEL002850	744.723	-0.481082	0.165191	-2.91229	0.00358794	0.0875876
AAEL003622	271.887	-1.35803	0.466679	-2.91	0.00361431	0.0877204
AAEL021926	78.9599	-1.25241	0.430266	-2.91078	0.0036053	0.0877204
AAEL020365	447.321	0.424589	0.145882	2.9105	0.00360855	0.0877204
AAEL002849	84.9496	-0.857468	0.294834	-2.90831	0.00363387	0.088025
AAEL003047	195.043	-0.968726	0.333408	-2.90553	0.00366632	0.0884834
AAEL000438	1028.14	0.638638	0.219804	2.90548	0.00366687	0.0884834
AAEL002742	11.5014	6.60258	2.27363	2.90398	0.00368452	0.0885693
AAEL001561	3892.79	0.409075	0.140851	2.90431	0.00368059	0.0885693
AAEL018326	18030.4	0.673363	0.232015	2.90224	0.00370506	0.0888932
AAEL012654	21.5829	-2.7391	0.944099	-2.90128	0.00371638	0.0889949
AAEL000244	8137.72	0.319632	0.110492	2.8928	0.00381825	0.0910874
AAEL014938	23.1043	-4.74762	1.64111	-2.89294	0.00381651	0.0910874
AAEL022615	695.45	0.72647	0.251571	2.88773	0.00388031	0.0923926
AAEL022255	59.409	2.17853	0.75528	2.8844	0.00392162	0.0931996
AAEL018054	811.335	0.308076	0.106883	2.88237	0.00394697	0.093625
AAEL019787	7.65099	-5.22418	1.81415	-2.87969	0.00398067	0.0942467
AAEL014754	2900.18	0.997255	0.346564	2.87755	0.00400774	0.0945316
AAEL027228	118.956	0.82402	0.286341	2.87775	0.00400518	0.0945316
AAEL006669	556.047	-0.39075	0.13587	-2.87592	0.00402857	0.0946675
AAEL008524	27.175	-1.91777	0.666793	-2.87611	0.00402616	0.0946675
AAEL026833	7371.51	0.827028	0.287683	2.87479	0.00404303	0.0948301
AAEL023292	25.4794	-1.82385	0.634607	-2.87399	0.00405326	0.0948932
AAEL010109	5609.72	0.774526	0.269585	2.87304	0.00406547	0.0950021
AAEL003112	11.3109	-6.28848	2.19077	-2.87044	0.004099	0.0950786
AAEL013163	8193.01	0.401285	0.139797	2.87047	0.00409858	0.0950786
AAEL003123	8468.94	-0.964367	0.335786	-2.87197	0.00407917	0.0950786
AAEL017167	110.468	-1.02381	0.356566	-2.87132	0.00408766	0.0950786
AAEL012726	8.37599	-5.94169	2.07235	-2.86712	0.00414223	0.095569
AAEL017179	157.108	-1.07404	0.374612	-2.86707	0.00414294	0.095569
AAEL003901	2481.28	0.398049	0.138811	2.86755	0.0041366	0.095569
AAEL024912	447.005	-0.592094	0.206571	-2.86629	0.00415311	0.095628
AAEL005701	51.4632	-1.25596	0.438657	-2.86319	0.00419394	0.0963805
AAEL013385	110.659	-1.43081	0.499821	-2.86265	0.00420112	0.0963805
AAEL024820	55.1067	-1.351	0.472302	-2.86047	0.00423016	0.0968698
AAEL004138	782.131	-0.435312	0.15237	-2.85694	0.0042775	0.097776
AAEL020729	21599.8	-0.76401	0.267692	-2.85406	0.00431646	0.098309
AAEL002366	112.666	-0.644158	0.225686	-2.85422	0.00431423	0.098309
AAEL004951	380.85	-0.708666	0.248474	-2.85207	0.00434355	0.0987471
AAEL019656	8911.89	0.293829	0.103093	2.85014	0.00437004	0.0991699
AAEL011125	5.00796	-5.78303	2.03005	-2.8487	0.00438977	0.0994382
AAEL007936	4635.49	0.227695	0.0799465	2.8481	0.00439814	0.0994485
AAEL011812	350.3	-0.419041	0.147345	-2.84395	0.00445579	0.100571
AAEL003954	4348.06	0.673752	0.237308	2.83914	0.0045235	0.101844
AAEL014078	143.033	-1.5405	0.542658	-2.8388	0.0045284	0.101844
AAEL008303	3611.01	-0.386259	0.136104	-2.83797	0.00454008	0.101925
AAEL011180	83909.6	0.366202	0.12951	2.8276	0.00468978	0.105098
AAEL008165	280.724	-0.460114	0.162762	-2.82692	0.00469979	0.105135
AAEL014408	540.605	-0.748616	0.2649	-2.82603	0.00471286	0.10524
AAEL021931	35443.1	-0.708597	0.250908	-2.82413	0.00474094	0.105679
AAEL001625	10.6206	-5.45538	1.93327	-2.82184	0.00477488	0.106181
AAEL007302	6.35683	-5.93778	2.10449	-2.82147	0.00478034	0.106181
AAEL009786	260.24	-0.501182	0.177724	-2.82	0.00480229	0.106348
AAEL008260	2946.94	-0.42008	0.148973	-2.81984	0.0048048	0.106348
AAEL022351	20.5317	-2.46481	0.875673	-2.81476	0.00488142	0.107854
AAEL007501	5594.22	0.218817	0.0778439	2.81098	0.00493914	0.108938
AAEL011060	104.997	-0.808391	0.28775	-2.80935	0.00496413	0.108988
AAEL006001	1354.27	0.616745	0.219553	2.8091	0.00496805	0.108988
AAEL007780	21.7136	8.74327	3.11241	2.80916	0.00496709	0.108988
AAEL021160	120.417	-0.630094	0.224346	-2.80858	0.00497608	0.108988
AAEL013335	627.501	0.445972	0.158884	2.80689	0.00500215	0.109369
AAEL006919	27.1282	4.18996	1.49377	2.80496	0.0050323	0.109837
AAEL021087	95.8902	0.873848	0.311621	2.8042	0.00504418	0.109906
AAEL018166	265.564	-0.630624	0.225076	-2.80183	0.00508142	0.110497
AAEL001480	1105.15	0.473598	0.169061	2.80135	0.00508891	0.110497
AAEL003964	600.953	0.310834	0.111089	2.79805	0.00514119	0.11144
AAEL006704	192176	-0.71563	0.256112	-2.79421	0.00520264	0.11206
AAEL012509	1499.14	-0.758204	0.271315	-2.79455	0.00519725	0.11206
AAEL022666	262.059	-0.555233	0.198682	-2.79458	0.00519664	0.11206
AAEL001740	1214.69	0.292257	0.1046	2.79404	0.00520548	0.11206
AAEL027164	2890.18	0.508013	0.181997	2.79132	0.00524933	0.112811
AAEL025982	72.1221	-0.660775	0.237612	-2.7809	0.00542091	0.1163
AAEL006656	479.806	-0.341196	0.122719	-2.7803	0.00543086	0.116315
AAEL022017	128.089	-0.637392	0.22941	-2.77839	0.00546284	0.116801
AAEL012556	111.778	-1.04078	0.374972	-2.77563	0.00550951	0.116995
AAEL019623	1331.75	0.420247	0.151393	2.77586	0.00550559	0.116995
AAEL003549	299.726	-0.508608	0.183184	-2.77649	0.00549488	0.116995
AAEL023706	1396.97	1.02088	0.367795	2.77567	0.00550881	0.116995
AAEL013220	1129.46	0.456473	0.164489	2.7751	0.00551846	0.116995
AAEL005472	1469.43	0.30538	0.110114	2.77332	0.00554883	0.117441
AAEL018150	2115.13	-1.14559	0.413608	-2.76976	0.00560983	0.118334
AAEL019751	1781.93	0.97964	0.353692	2.76976	0.00560981	0.118334
AAEL002134	294.421	-0.577163	0.208804	-2.76413	0.00570747	0.120191
AAEL024455	776.207	0.409751	0.14843	2.76058	0.00576996	0.121304
AAEL018114	174.558	-0.725003	0.262739	-2.7594	0.00579071	0.121537
AAEL006990	7784.9	0.473684	0.171801	2.75717	0.0058304	0.121963
AAEL005042	218.199	-0.613569	0.222511	-2.75748	0.0058249	0.121963
AAEL006890	52.9438	-2.3098	0.838341	-2.7552	0.00586568	0.122497
AAEL000757	10461.5	-0.559776	0.203528	-2.75037	0.00595285	0.123701
AAEL007505	627.008	-0.826475	0.300426	-2.75101	0.00594121	0.123701
AAEL012076	1174.61	0.325665	0.118399	2.75056	0.00594936	0.123701
AAEL008509	724.699	0.489748	0.178194	2.74839	0.00598883	0.124244
AAEL010956	107.356	-0.867061	0.315605	-2.7473	0.0060089	0.124454
AAEL004023	6916.51	0.435055	0.15851	2.74465	0.00605748	0.125254
AAEL027482	1261.1	-0.949507	0.34614	-2.74313	0.00608562	0.12563
AAEL005311	792.053	0.256117	0.0934145	2.74172	0.00611176	0.125756
AAEL019653	7.37748	4.93098	1.79826	2.74208	0.00610518	0.125756
AAEL021304	77.3094	-4.11661	1.50187	-2.741	0.00612533	0.12583
AAEL001888	4083.06	-0.775373	0.282995	-2.73988	0.00614611	0.125845
AAEL019643	131.736	5.65416	2.06365	2.73989	0.00614604	0.125845
AAEL012268	35.9318	-2.64958	0.967381	-2.73892	0.00616419	0.125958
AAEL003697	57.7467	-1.87061	0.683072	-2.73852	0.00617165	0.125958
AAEL022179	152.612	-0.855781	0.312616	-2.73748	0.00619123	0.126153
AAEL012263	200.528	-0.653998	0.239448	-2.73128	0.00630895	0.127929
AAEL020196	642.879	-0.309309	0.113209	-2.73221	0.00629117	0.127929
AAEL011086	602.573	0.405359	0.148397	2.73158	0.0063031	0.127929
AAEL004768	271.635	-0.748197	0.274167	-2.72898	0.00635309	0.128418
AAEL005882	1269.71	0.262188	0.0960761	2.72896	0.0063535	0.128418
AAEL001964	685.104	-0.685221	0.251189	-2.72791	0.00637371	0.12856
AAEL012353	19.1629	-4.70912	1.72651	-2.72754	0.00638094	0.12856
AAEL020341	2487.41	0.247464	0.0907541	2.72676	0.00639598	0.128657
AAEL004165	260.944	-0.973274	0.357045	-2.72591	0.00641239	0.12878
AAEL002646	1766.41	0.443216	0.162711	2.72395	0.00645072	0.129001
AAEL005936	23.2293	2.06476	0.758053	2.72377	0.00645417	0.129001
AAEL005530	172.613	-1.44816	0.531626	-2.72402	0.00644931	0.129001
AAEL009705	29.0866	2.00714	0.737124	2.72293	0.00647053	0.129123
AAEL000256	86.3847	-1.48031	0.543778	-2.72227	0.00648344	0.129176
AAEL010492	82.2947	-0.830844	0.305336	-2.72108	0.00650691	0.129438
AAEL002324	1773.45	0.286005	0.105195	2.71881	0.00655179	0.129737
AAEL021952	171.374	0.558551	0.205387	2.7195	0.00653806	0.129737
AAEL017975	168.755	2.79683	1.02876	2.71863	0.0065552	0.129737
AAEL020078	78.4786	1.05002	0.386287	2.71823	0.00656323	0.129737
AAEL001142	735.51	0.421433	0.155165	2.71604	0.0066068	0.130262
AAEL023510	450.836	0.600181	0.220992	2.71585	0.00661051	0.130262
AAEL004667	27.2689	-2.23266	0.822849	-2.71332	0.00666118	0.131055
AAEL011562	1196.05	0.532223	0.196254	2.71191	0.0066897	0.131411
AAEL001476	1102.79	0.578436	0.213552	2.70864	0.00675596	0.132505
AAEL001183	661.417	0.305549	0.112977	2.70454	0.00684	0.133945
AAEL019627	195.153	-0.786758	0.291205	-2.70173	0.00689797	0.13466
AAEL001690	1.19871e+06	1.30258	0.482051	2.70217	0.00688895	0.13466
AAEL015404	6525.14	-0.765368	0.283509	-2.69962	0.00694185	0.135307
AAEL003433	14737.1	0.348367	0.12912	2.698	0.00697571	0.135756
AAEL024981	6.91877	-5.75821	2.13495	-2.69712	0.00699427	0.135864
AAEL010881	16.2	-3.10474	1.15131	-2.69671	0.00700286	0.135864
AAEL022695	826.37	0.692275	0.256791	2.69587	0.00702045	0.135996
AAEL001693	245950	0.852283	0.316539	2.69251	0.00709167	0.136975
AAEL013002	3833.81	0.302682	0.112419	2.69245	0.00709282	0.136975
AAEL011536	5356.83	0.548018	0.20367	2.69071	0.00712997	0.137482
AAEL000111	24.4242	-2.52197	0.937491	-2.69013	0.00714244	0.137511
AAEL008069	89.1491	-1.20761	0.449437	-2.68693	0.00721119	0.13857
AAEL027831	13.834	-2.79408	1.04022	-2.68604	0.00723051	0.13857
AAEL012437	1218.41	0.306938	0.114268	2.68612	0.00722872	0.13857
AAEL023746	1555.87	0.651455	0.242786	2.68325	0.00729113	0.139519
AAEL001336	5659.22	0.280848	0.104701	2.68238	0.00730993	0.139666
AAEL012538	21.1194	-3.63049	1.35703	-2.67531	0.00746599	0.142432
AAEL002903	1416.98	0.814687	0.304666	2.67404	0.00749444	0.142758
AAEL025187	1055.51	-0.586232	0.219385	-2.67216	0.00753643	0.143124
AAEL011453	24.5344	2.95471	1.10573	2.67219	0.0075359	0.143124
AAEL021417	24.6396	-8.30368	3.10923	-2.67065	0.00757038	0.143212
AAEL016992	13.094	4.85566	1.8181	2.67073	0.00756873	0.143212
AAEL007051	343.807	2.5599	0.958606	2.67044	0.00757523	0.143212
AAEL007797	159.627	-0.544591	0.204081	-2.6685	0.00761904	0.143824
AAEL004090	1280.68	0.870428	0.326273	2.66779	0.00763516	0.143912
AAEL020839	39.4151	1.40266	0.526995	2.66163	0.00777643	0.146355
AAEL025750	119.596	-1.64058	0.616601	-2.66068	0.00779836	0.146549
AAEL007084	822.053	-0.348016	0.130871	-2.65924	0.00783173	0.146956
AAEL018340	10.7954	7.71771	2.90691	2.65495	0.00793197	0.148615
AAEL003935	517.353	0.555502	0.209885	2.6467	0.00812808	0.152063
AAEL019807	243.5	1.09393	0.413422	2.64604	0.00814403	0.152135
AAEL015598	405.652	0.63446	0.239874	2.64497	0.0081697	0.152162
AAEL027567	538.503	0.403239	0.15243	2.6454	0.00815942	0.152162
AAEL006825	7.43002	4.56601	1.72693	2.644	0.00819315	0.152373
AAEL013636	777.708	-0.301087	0.113908	-2.64325	0.00821152	0.152489
AAEL002779	3788.24	0.232476	0.0880151	2.64132	0.00825833	0.153132
AAEL020217	777.372	-0.274121	0.103807	-2.64068	0.00827392	0.153195
AAEL018514	89.3085	-2.50334	0.948592	-2.63901	0.00831495	0.153503
AAEL027269	98.7564	0.532183	0.201651	2.63913	0.00831197	0.153503
AAEL014363	31.9128	2.37999	0.902174	2.63806	0.00833821	0.153707
AAEL011177	202.074	1.00198	0.379935	2.63725	0.00835807	0.153847
AAEL007381	60.651	-1.21455	0.460728	-2.63614	0.00838544	0.154125
AAEL008794	731.003	0.381855	0.144895	2.63538	0.0084042	0.154245
AAEL019693	3.86247	-5.43237	2.06178	-2.6348	0.00841871	0.154286
AAEL006953	53145.6	-1.15798	0.43975	-2.63328	0.00845645	0.154752
AAEL017811	162.395	-1.82186	0.692348	-2.63142	0.00850295	0.155377
AAEL015543	860.407	-0.507383	0.192897	-2.63033	0.00853019	0.155415
AAEL010644	881.752	0.773034	0.294055	2.62887	0.00856687	0.155415
AAEL004630	216.573	0.661587	0.251646	2.62904	0.00856264	0.155415
AAEL000716	2626.3	0.312905	0.119001	2.62943	0.00855289	0.155415
AAEL006674	64.7831	-2.36072	0.897789	-2.62948	0.00855158	0.155415
AAEL005484	287.868	-0.440711	0.167689	-2.62815	0.00858499	0.155519
AAEL003192	6782.35	0.568851	0.216764	2.62429	0.00868291	0.157067
AAEL012040	288.317	-0.384432	0.146565	-2.62295	0.00871728	0.157462
AAEL024654	40.6455	-1.25587	0.479027	-2.62172	0.00874872	0.157803
AAEL003162	1023.27	0.425407	0.162486	2.61812	0.00884149	0.159248
AAEL011178	946.079	-0.460422	0.176108	-2.61443	0.00893754	0.160694
AAEL006957	195.279	-0.878249	0.335971	-2.61406	0.00894734	0.160694
AAEL008365	59.2901	-1.49267	0.571462	-2.61202	0.0090009	0.161426
AAEL022387	16112.8	0.607788	0.232816	2.6106	0.00903848	0.161638
AAEL010486	2192.48	0.220653	0.084512	2.61091	0.00903028	0.161638
AAEL008070	291.054	-0.747455	0.286596	-2.60804	0.00910622	0.162539
AAEL012633	23.7603	-1.97372	0.756875	-2.60772	0.00911469	0.162539
AAEL008391	228.006	0.50686	0.194466	2.60642	0.00914931	0.162695
AAEL017056	1199.34	0.768808	0.294944	2.60663	0.00914394	0.162695
AAEL023517	56.1969	-1.27559	0.490222	-2.60207	0.00926626	0.164542
AAEL011160	64.8041	-1.01587	0.390573	-2.60098	0.00929585	0.164834
AAEL002142	414.29	-0.673002	0.258993	-2.59853	0.00936231	0.165546
AAEL002661	78.6591	2.13474	0.821412	2.59887	0.00935317	0.165546
AAEL003529	550.443	-0.400199	0.154163	-2.59594	0.00943333	0.166567
AAEL019477	986.926	-0.360834	0.139139	-2.59334	0.0095048	0.167125
AAEL019493	739.176	-0.264147	0.101821	-2.59425	0.00947988	0.167125
AAEL020392	324.092	-0.585561	0.225773	-2.59358	0.00949813	0.167125
AAEL006523	209.219	0.59503	0.229903	2.58817	0.00964863	0.168261
AAEL009817	436.804	-0.431206	0.166477	-2.59019	0.00959229	0.168261
AAEL007532	806.777	0.344224	0.133001	2.58814	0.0096497	0.168261
AAEL011817	6556.45	-0.295478	0.114111	-2.58939	0.00961458	0.168261
AAEL021322	15.9281	1.62522	0.627891	2.58837	0.00964308	0.168261
AAEL004810	6.38976	-5.63126	2.17458	-2.58959	0.00960905	0.168261
AAEL001294	73.6072	-1.83298	0.708528	-2.58702	0.00968091	0.168571
AAEL011506	45.637	-1.92032	0.742441	-2.58649	0.00969595	0.1686
AAEL022793	401.393	-0.47529	0.183867	-2.58497	0.00973885	0.168878
AAEL027914	992.419	0.299984	0.116048	2.585	0.00973804	0.168878
AAEL002601	32.6131	-2.4223	0.937524	-2.58372	0.00977415	0.169257
AAEL024558	5.01337	4.47775	1.7338	2.58263	0.00980506	0.169559
AAEL022302	18.4626	1.94916	0.755015	2.58162	0.0098337	0.16982
AAEL009951	2154.66	-0.605938	0.234913	-2.57941	0.0098968	0.169905
AAEL023699	82.4536	-1.08856	0.421982	-2.57963	0.00989054	0.169905
AAEL018061	624.377	1.33718	0.51833	2.57979	0.00988609	0.169905
AAEL017144	136.705	-2.39007	0.926712	-2.57909	0.00990616	0.169905
AAEL004952	391.426	0.523505	0.202951	2.57947	0.00989523	0.169905
AAEL006614	304.418	-0.486009	0.188487	-2.57848	0.00992357	0.169972
AAEL003541	2177.34	-0.419552	0.162865	-2.57607	0.00999314	0.170698
AAEL012460	1467.96	0.246304	0.0956022	2.57634	0.00998512	0.170698
AAEL006428	170.458	0.732567	0.284655	2.57353	0.0100668	0.171723
AAEL008276	251.228	-0.59344	0.230641	-2.573	0.010082	0.171732
AAEL018294	8.88106	-3.20733	1.24674	-2.57257	0.0100947	0.171732
AAEL019645	360.665	-0.517134	0.201092	-2.57163	0.0101222	0.171797
AAEL005258	1672.56	0.302939	0.117806	2.5715	0.0101258	0.171797
AAEL025186	5.66237	-2.4836	0.966406	-2.56994	0.0101717	0.172111
AAEL003695	709.566	0.431017	0.167706	2.57007	0.0101677	0.172111
AAEL014531	674.317	0.338352	0.131754	2.56807	0.0102267	0.172346
AAEL006052	118.813	-0.570247	0.222033	-2.5683	0.0102198	0.172346
AAEL006102	97.0849	-2.0681	0.80528	-2.56817	0.0102237	0.172346
AAEL010097	73.0822	-2.64919	1.03178	-2.5676	0.0102405	0.172348
AAEL018339	973.403	-0.279185	0.108839	-2.56513	0.0103138	0.17335
AAEL000134	61.5786	-0.774112	0.301844	-2.56461	0.0103291	0.173375
AAEL001856	619.388	0.342424	0.133564	2.56375	0.0103549	0.173576
AAEL022879	263.848	3.35548	1.30953	2.56236	0.0103963	0.174038
AAEL002462	130.372	-0.697221	0.272204	-2.56139	0.0104254	0.174293
AAEL006707	1917.02	0.416962	0.162977	2.55841	0.0105153	0.175562
AAEL009288	901.446	0.410387	0.160611	2.55516	0.0106138	0.176972
AAEL013776	1031.88	-0.621912	0.243781	-2.55111	0.0107382	0.177668
AAEL013068	15384.4	0.192332	0.0753724	2.55176	0.0107181	0.177668
AAEL026313	21.8061	-2.67384	1.04776	-2.55195	0.0107123	0.177668
AAEL023098	21119.4	0.445481	0.174596	2.55149	0.0107262	0.177668
AAEL020104	229.774	-0.453454	0.177697	-2.55184	0.0107156	0.177668
AAEL009685	297.903	-0.802642	0.314634	-2.55103	0.0107404	0.177668
AAEL012929	1098.44	-0.514781	0.201879	-2.54994	0.010774	0.17799
AAEL011764	28.8653	-3.49326	1.37144	-2.54714	0.0108609	0.178254
AAEL015640	383.378	-0.412336	0.161869	-2.54735	0.0108545	0.178254
AAEL002855	40.6718	-1.88821	0.74124	-2.54737	0.0108539	0.178254
AAEL011708	25459.7	0.644924	0.253143	2.54766	0.0108447	0.178254
AAEL008785	130.019	-1.39866	0.548721	-2.54895	0.0108048	0.178254
AAEL010401	386.963	-0.516742	0.202974	-2.54585	0.0109013	0.178685
AAEL019804	379.629	-0.525255	0.20636	-2.54533	0.0109175	0.178717
AAEL005006	345.99	0.558663	0.219735	2.54245	0.011008	0.17973
AAEL029056	55.6396	-3.59479	1.41388	-2.54249	0.0110064	0.17973
AAEL020283	3.13391	4.95841	1.95062	2.54197	0.0110231	0.179744
AAEL021552	11.8192	2.90656	1.1452	2.53804	0.0111477	0.181539
AAEL012084	1754.31	0.234485	0.0924208	2.53715	0.0111761	0.181766
AAEL002310	76.9062	-0.719126	0.283749	-2.53437	0.011265	0.18274
AAEL023657	734.112	0.524368	0.206899	2.53442	0.0112635	0.18274
AAEL027477	38.2222	1.45901	0.575805	2.53386	0.0112813	0.182768
AAEL024901	4.48713	-4.92312	1.94401	-2.53246	0.0113267	0.18314
AAEL005631	526.451	0.360853	0.142527	2.53182	0.0113473	0.18314
AAEL003569	2611.75	0.363842	0.143709	2.5318	0.0113479	0.18314
AAEL011347	5052.83	0.422011	0.167006	2.52692	0.0115066	0.185226
AAEL011927	1913.13	0.269636	0.106696	2.52714	0.0114994	0.185226
AAEL023653	383.912	-1.08985	0.43151	-2.52567	0.0115478	0.185651
AAEL014428	110.486	-1.06257	0.421109	-2.52325	0.0116274	0.186281
AAEL011307	24.0056	-1.91522	0.759032	-2.52324	0.0116278	0.186281
AAEL010185	62.2138	1.06768	0.423155	2.52313	0.0116314	0.186281
AAEL004633	1435.74	0.273509	0.10852	2.52036	0.0117235	0.187413
AAEL003991	936.531	-0.316024	0.125429	-2.51954	0.0117507	0.187413
AAEL002106	159.401	0.507271	0.201361	2.51921	0.0117617	0.187413
AAEL008879	69312.7	0.551773	0.219003	2.51948	0.0117528	0.187413
AAEL006630	2740.65	0.605619	0.240467	2.51851	0.0117852	0.187549
AAEL007935	147.983	-0.667323	0.265339	-2.51498	0.0119038	0.189197
AAEL021055	3.68152	-4.33421	1.72371	-2.51447	0.0119213	0.189235
AAEL003758	5705.72	0.255082	0.10149	2.51336	0.0119586	0.189588
AAEL007120	265.306	-1.42162	0.566288	-2.51041	0.0120591	0.1907
AAEL012941	3268.41	0.272191	0.108412	2.51071	0.0120488	0.1907
AAEL001385	3492.6	0.29864	0.119046	2.5086	0.012121	0.191369
AAEL009679	8.59749	-4.32263	1.72334	-2.50829	0.0121318	0.191369
AAEL009891	2468.45	-0.22014	0.0878619	-2.50552	0.0122271	0.19263
AAEL001811	230.11	-0.643251	0.256862	-2.50426	0.0122707	0.192638
AAEL006946	10610.9	0.306833	0.122546	2.50382	0.012286	0.192638
AAEL013544	6.33396	5.29488	2.11479	2.50374	0.0122889	0.192638
AAEL025618	232.598	-0.569126	0.227195	-2.50501	0.0122448	0.192638
AAEL024869	4.85333	4.97862	1.98935	2.50263	0.0123273	0.19276
AAEL004120	52.1746	-2.53579	1.01308	-2.50305	0.0123127	0.19276
AAEL004986	8231.14	-0.551469	0.220578	-2.50011	0.0124156	0.193418
AAEL023744	22.111	2.28579	0.914116	2.50055	0.0124001	0.193418
AAEL007738	1114.67	0.300558	0.120207	2.50034	0.0124075	0.193418
AAEL008408	2014.92	0.388698	0.155541	2.499	0.0124543	0.193782
AAEL012709	329.524	0.660347	0.264307	2.49841	0.0124751	0.193866
AAEL001268	432.756	-0.524338	0.210061	-2.49612	0.0125558	0.194879
AAEL004276	73.9771	-0.810306	0.324739	-2.49525	0.0125868	0.195118
AAEL018227	5.87914	5.39943	2.16525	2.49367	0.0126429	0.195507
AAEL025100	16.4722	-2.64318	1.05986	-2.49391	0.0126345	0.195507
AAEL026803	66.1808	1.35383	0.543082	2.49287	0.0126716	0.195709
AAEL012031	303.002	-0.523728	0.210358	-2.4897	0.0127851	0.19722
AAEL026589	241.504	0.511132	0.205383	2.48867	0.0128221	0.197548
AAEL021581	1500.27	0.33416	0.134324	2.48772	0.0128564	0.197835
AAEL004775	57.2737	-0.837405	0.336686	-2.4872	0.0128752	0.197882
AAEL009952	447.269	0.427938	0.17221	2.48498	0.0129559	0.198879
AAEL026896	5986.95	-0.717784	0.288916	-2.48441	0.0129767	0.198955
AAEL028894	9.37058	-2.26391	0.911958	-2.48247	0.0130475	0.198965
AAEL000288	414.332	-0.54536	0.219771	-2.48149	0.0130833	0.198965
AAEL027052	19.9778	-3.87272	1.56005	-2.48244	0.0130487	0.198965
AAEL000315	1111.86	-0.303984	0.122478	-2.48195	0.0130667	0.198965
AAEL020113	1414.03	0.251775	0.101466	2.48136	0.0130882	0.198965
AAEL022329	4.08905	5.21036	2.09872	2.48264	0.0130414	0.198965
AAEL010893	539.608	1.47415	0.593608	2.48338	0.0130144	0.198965
AAEL006145	4916.8	0.147015	0.0593041	2.479	0.0131752	0.200046
AAEL006735	577.007	-0.351807	0.142081	-2.4761	0.0132825	0.201433
AAEL010565	4288.01	-0.295824	0.1195	-2.47551	0.0133046	0.201524
AAEL021190	1197.3	0.446759	0.180578	2.47405	0.0133591	0.202107
AAEL021789	15.5308	-3.95574	1.59981	-2.47263	0.0134123	0.202424
AAEL009890	1001.44	-0.339999	0.137483	-2.47302	0.0133978	0.202424
AAEL008153	1880.42	0.284483	0.115146	2.47064	0.0134872	0.20331
AAEL005849	57.7936	5.98462	2.42528	2.4676	0.0136022	0.204553
AAEL022196	49.9625	-0.988824	0.400707	-2.4677	0.0135984	0.204553
AAEL020021	67.1671	-0.815614	0.330806	-2.46554	0.0136808	0.205128
AAEL012208	2112.79	0.294209	0.119319	2.46573	0.0136734	0.205128
AAEL005449	87.4529	-0.599291	0.243091	-2.4653	0.0136899	0.205128
AAEL022024	6.2299	6.48174	2.62963	2.46489	0.0137056	0.205128
AAEL009295	1154.81	0.440392	0.17874	2.46387	0.0137448	0.205469
AAEL001315	384.948	-0.397261	0.161301	-2.46285	0.0137838	0.205807
AAEL007563	12.8478	-3.27696	1.33151	-2.46109	0.0138517	0.206576
AAEL019970	6.98333	4.06864	1.65427	2.45947	0.013914	0.20726
AAEL000336	94.1487	-0.716911	0.291699	-2.45771	0.0139828	0.208037
AAEL005228	420.014	-0.432064	0.175906	-2.45622	0.0140409	0.208163
AAEL019861	162.162	-0.797947	0.324823	-2.45656	0.0140275	0.208163
AAEL023179	99.0806	-1.47811	0.601725	-2.45645	0.0140316	0.208163
AAEL012993	362.584	0.396767	0.161566	2.45576	0.0140588	0.208183
AAEL024456	10763.1	0.54753	0.223049	2.45475	0.0140984	0.208278
AAEL005736	1390.62	0.286075	0.116524	2.45507	0.0140856	0.208278
AAEL002597	8789.27	0.261004	0.106362	2.45393	0.0141306	0.208509
AAEL006642	53635.8	0.622619	0.254081	2.45048	0.0142667	0.210271
AAEL021515	188.889	-0.577484	0.235932	-2.44767	0.0143781	0.211417
AAEL002720	73.2405	-1.46633	0.599051	-2.44776	0.0143748	0.211417
AAEL018240	2422.01	1.01678	0.415498	2.44713	0.0143997	0.211488
AAEL001414	263.098	-1.74514	0.71343	-2.44613	0.0144401	0.211833
AAEL005017	1788.61	0.329339	0.134679	2.44536	0.0144707	0.212034
AAEL023905	19.7644	-2.34094	0.957991	-2.44359	0.0145419	0.21283
AAEL022076	195.887	-0.818517	0.335258	-2.44145	0.0146283	0.213596
AAEL022938	841.085	0.560059	0.22937	2.44173	0.0146171	0.213596
AAEL002723	15944.4	0.323553	0.132597	2.44013	0.0146822	0.213958
AAEL027991	44.5871	-1.22963	0.503946	-2.44001	0.0146871	0.213958
AAEL008289	90.0676	-1.9562	0.802085	-2.43889	0.0147325	0.21399
AAEL026096	219.931	0.541672	0.222074	2.43915	0.0147217	0.21399
AAEL026446	41.6697	-1.01951	0.418129	-2.43828	0.0147574	0.21399
AAEL009566	56.0397	-1.54322	0.6329	-2.43833	0.0147554	0.21399
AAEL014820	580.622	0.544824	0.223823	2.43418	0.0149256	0.214329
AAEL007202	2299.6	0.332885	0.136769	2.43392	0.0149364	0.214329
AAEL001551	93.8014	-0.700534	0.287702	-2.43492	0.0148949	0.214329
AAEL006321	8503.73	0.47333	0.194497	2.43361	0.0149489	0.214329
AAEL027483	2184.53	0.392608	0.161285	2.43425	0.0149226	0.214329
AAEL027099	188.691	-0.733772	0.301093	-2.43703	0.0148085	0.214329
AAEL002175	7167.87	0.505944	0.207686	2.4361	0.0148465	0.214329
AAEL014566	43.0719	-1.55053	0.637024	-2.43402	0.0149323	0.214329
AAEL011126	27.58	-3.34897	1.37616	-2.43356	0.0149512	0.214329
AAEL011598	2073.71	0.748733	0.307559	2.43444	0.0149148	0.214329
AAEL008585	809.338	0.33572	0.138106	2.43088	0.015062	0.215672
AAEL026879	143.069	-0.501874	0.206684	-2.42822	0.0151732	0.217017
AAEL028119	408.719	-0.417682	0.17205	-2.42767	0.0151962	0.217099
AAEL009584	835.56	-0.330256	0.136107	-2.42645	0.0152474	0.217582
AAEL005254	1032.42	0.315636	0.130145	2.42526	0.0152974	0.218049
AAEL020080	51.369	-0.868888	0.358332	-2.42481	0.0153162	0.218069
AAEL011081	2810.2	0.515478	0.212705	2.42344	0.0153744	0.218651
AAEL004379	1406.9	0.281424	0.116242	2.42102	0.015477	0.219243
AAEL013479	292.152	-0.427743	0.176676	-2.42106	0.0154754	0.219243
AAEL000396	358.141	-0.374393	0.154708	-2.42	0.0155207	0.219243
AAEL012154	1205.21	-0.573975	0.237175	-2.42005	0.0155185	0.219243
AAEL001241	27.462	-2.00551	0.828213	-2.42149	0.0154572	0.219243
AAEL005020	219.892	-0.574145	0.237211	-2.4204	0.0155034	0.219243
AAEL005464	137.581	-0.741175	0.306338	-2.41947	0.0155431	0.219313
AAEL010477	1503.78	0.933545	0.386252	2.41693	0.015652	0.220602
AAEL007067	977.966	-0.222392	0.0920968	-2.41476	0.0157456	0.221672
AAEL002043	66.4487	-1.0222	0.423577	-2.41325	0.0158108	0.222195
AAEL008467	940.649	2.57333	1.06641	2.41309	0.015818	0.222195
AAEL026817	1476.18	-0.214521	0.0890172	-2.40988	0.0159577	0.223159
AAEL007452	1177.62	-0.367571	0.152509	-2.41016	0.0159453	0.223159
AAEL009871	875.613	-0.455682	0.189038	-2.41053	0.0159293	0.223159
AAEL003345	599.638	-1.57566	0.653714	-2.41033	0.0159383	0.223159
AAEL014149	243.347	-0.563674	0.234077	-2.40807	0.0160371	0.224021
AAEL009588	1991.39	2.71854	1.12923	2.40742	0.0160657	0.224171
AAEL022346	120.784	-0.595269	0.247364	-2.40645	0.0161082	0.224515
AAEL005748	29.0024	-3.05428	1.26961	-2.40569	0.016142	0.224737
AAEL011130	8.97614	5.00159	2.07952	2.40516	0.0161654	0.224814
AAEL026494	541.217	0.52484	0.218288	2.40434	0.0162016	0.225067
AAEL006949	1185.39	0.228376	0.0950138	2.4036	0.0162344	0.225274
AAEL023318	8.57042	-4.37225	1.82023	-2.40203	0.0163045	0.2255
AAEL020944	3.83375	3.48026	1.44884	2.40211	0.016301	0.2255
AAEL023078	2321.48	0.501088	0.208603	2.40212	0.0163005	0.2255
AAEL017748	6.8671	-3.50705	1.46084	-2.4007	0.0163637	0.226071
AAEL002083	53968.9	0.173838	0.0724262	2.40021	0.0163856	0.226125
AAEL018160	772.91	0.30986	0.129143	2.39935	0.0164241	0.226407
AAEL012310	11679.1	0.187999	0.0783799	2.39856	0.0164595	0.226648
AAEL001449	60.3196	-0.809514	0.33771	-2.39707	0.0165268	0.227325
AAEL014316	23.6044	-2.97977	1.24357	-2.39614	0.0165686	0.227651
AAEL011809	14.3923	2.61555	1.09286	2.3933	0.0166975	0.229171
AAEL019727	56.4006	-1.58605	0.663482	-2.3905	0.0168254	0.229673
AAEL023255	805.41	0.721623	0.301846	2.3907	0.0168161	0.229673
AAEL010731	4873.19	0.403344	0.16872	2.39061	0.0168203	0.229673
AAEL005118	178.442	-0.55395	0.231691	-2.3909	0.0168073	0.229673
AAEL021481	112.964	-0.669109	0.279891	-2.39061	0.0168205	0.229673
AAEL012687	2300.49	-0.294291	0.123188	-2.38896	0.0168962	0.230139
AAEL003910	94.4351	-0.593432	0.248388	-2.38913	0.0168883	0.230139
AAEL009663	183.334	-0.56265	0.235695	-2.38719	0.0169777	0.230999
AAEL015115	87.0483	-0.85854	0.359933	-2.38528	0.0170663	0.231931
AAEL025597	100.257	-1.58072	0.6628	-2.38491	0.0170831	0.231931
AAEL002950	3425.14	-0.420893	0.176565	-2.38379	0.0171354	0.23239
AAEL001847	3080.74	-0.319075	0.133991	-2.38132	0.0172507	0.233703
AAEL019728	6031.13	0.992088	0.417486	2.37634	0.0174854	0.236627
AAEL019701	5.08202	-5.11201	2.15246	-2.37497	0.0175505	0.237101
AAEL027376	68.1751	-0.651987	0.274589	-2.37441	0.017577	0.237101
AAEL028100	107.762	0.749128	0.315491	2.37448	0.0175737	0.237101
AAEL008533	188.111	-0.450766	0.189932	-2.3733	0.01763	0.237561
AAEL007317	406.322	-0.465351	0.196197	-2.37186	0.0176988	0.238233
AAEL024066	214.767	-0.926851	0.391019	-2.37035	0.0177715	0.2387
AAEL025252	73.4551	2.39771	1.0115	2.37046	0.0177661	0.2387
AAEL008135	1441.15	0.208971	0.0882009	2.36926	0.0178238	0.239147
AAEL011383	196.556	0.502062	0.211956	2.36871	0.0178503	0.239248
AAEL019430	2863.03	0.401293	0.169597	2.36615	0.0179741	0.24065
AAEL003476	81.0103	-0.811171	0.34374	-2.35984	0.0182829	0.244524
AAEL000038	5112.73	0.387241	0.164179	2.35866	0.0183412	0.245043
AAEL024567	9.7397	2.1145	0.897672	2.35554	0.0184961	0.24685
AAEL010685	215.494	-1.12753	0.479038	-2.35373	0.018586	0.247787
AAEL027039	6.60356	2.75676	1.17197	2.35225	0.0186604	0.247835
AAEL008741	2272.09	0.195992	0.0833243	2.35216	0.0186646	0.247835
AAEL024852	1951.59	-0.271155	0.115237	-2.35302	0.0186217	0.247835
AAEL023308	24.5145	2.13429	0.907405	2.35209	0.0186684	0.247835
AAEL019714	2226.57	0.346503	0.147469	2.34967	0.01879	0.249186
AAEL007704	2726.67	0.588081	0.250473	2.34788	0.0188804	0.250113
AAEL004328	154.05	0.682117	0.290571	2.3475	0.0188997	0.250113
AAEL022360	2.35524	-5.21957	2.22424	-2.34668	0.0189418	0.250406
AAEL026759	18.2324	-1.68146	0.716701	-2.3461	0.0189708	0.250526
AAEL013853	82.8762	-1.02121	0.435483	-2.345	0.019027	0.250742
AAEL025182	8.01709	2.532	1.07973	2.34504	0.0190253	0.250742
AAEL022349	3.87801	-4.39107	1.87597	-2.34069	0.0192479	0.253387
AAEL008539	394.399	-0.361941	0.154683	-2.33989	0.0192894	0.253667
AAEL020890	113.261	-1.2771	0.546215	-2.33809	0.0193824	0.253898
AAEL008535	265.614	-0.420142	0.179693	-2.33811	0.0193818	0.253898
AAEL002612	61.3352	1.43613	0.614081	2.33867	0.0193525	0.253898
AAEL024196	46109.8	0.733781	0.313851	2.33799	0.0193877	0.253898
AAEL026876	77.7578	-0.658439	0.281681	-2.33753	0.0194114	0.253944
AAEL026138	22.2268	1.71703	0.73472	2.33699	0.0194397	0.25405
AAEL017301	2267.7	-0.372102	0.159342	-2.33525	0.0195304	0.254971
AAEL019546	7484.23	0.226476	0.0971745	2.33061	0.019774	0.257882
AAEL020488	168.926	-0.649393	0.27879	-2.32933	0.0198416	0.258228
AAEL009661	79.0525	-0.994821	0.427023	-2.32967	0.0198237	0.258228
AAEL014348	1642.57	0.553648	0.23794	2.32684	0.019974	0.259682
AAEL025400	12.9613	2.03293	0.874044	2.32588	0.0200247	0.259805
AAEL019458	5044.67	0.629091	0.270461	2.32599	0.0200191	0.259805
AAEL013338	50.1102	-5.21863	2.24564	-2.32389	0.0201313	0.260382
AAEL005303	1735.93	0.352529	0.151678	2.3242	0.0201149	0.260382
AAEL001293	5795.04	0.538865	0.231803	2.32466	0.02009	0.260382
AAEL005134	264.451	-1.05967	0.456335	-2.32212	0.0202264	0.261343
AAEL002296	7032.46	0.26854	0.115674	2.32153	0.0202584	0.261487
AAEL003952	733.053	-0.280424	0.120839	-2.32064	0.0203065	0.261688
AAEL026227	2893.01	-0.386479	0.166552	-2.32047	0.0203156	0.261688
AAEL001851	1803.83	-0.564022	0.243286	-2.31835	0.0204304	0.262897
AAEL006647	1819.18	0.206799	0.0892515	2.31703	0.0205021	0.263281
AAEL021563	84.0632	0.982059	0.423841	2.31705	0.0205011	0.263281
AAEL023309	101.883	-0.602796	0.260332	-2.31548	0.0205864	0.263583
AAEL015156	17.9227	-3.54587	1.53138	-2.31547	0.0205874	0.263583
AAEL005215	2650.72	0.24208	0.10455	2.31545	0.0205885	0.263583
AAEL003677	138.069	-0.549065	0.237307	-2.31374	0.0206822	0.263977
AAEL026819	1029.06	0.712697	0.307954	2.3143	0.0206515	0.263977
AAEL010043	479.411	-0.51772	0.223751	-2.31382	0.0206777	0.263977
AAEL028108	2295.71	0.572931	0.247759	2.31246	0.0207526	0.264606
AAEL017538	73.0486	1.14984	0.497355	2.3119	0.0207831	0.264727
AAEL009534	35.2089	2.51445	1.08827	2.3105	0.0208605	0.265444
AAEL002588	450.699	-1.31648	0.570224	-2.3087	0.0209604	0.266445
AAEL001874	1036.24	0.252281	0.109335	2.30741	0.0210319	0.266972
AAEL002176	409.591	-0.39301	0.170355	-2.30701	0.0210543	0.266972
AAEL011376	395.128	-0.397025	0.17211	-2.30681	0.0210655	0.266972
AAEL014523	238.796	-0.616122	0.267377	-2.30432	0.0212048	0.268466
AAEL026616	10.9659	-3.10425	1.34763	-2.30349	0.0212514	0.268785
AAEL004533	7.4895	-3.17531	1.3803	-2.30045	0.0214229	0.270682
AAEL023109	59.0388	0.722777	0.314572	2.29765	0.0215816	0.272413
AAEL004690	56.4464	-1.2115	0.527479	-2.29677	0.0216321	0.272777
AAEL011121	99.1621	-0.700309	0.305166	-2.29484	0.0217421	0.273889
AAEL006188	263.293	0.626338	0.273245	2.29222	0.0218927	0.274398
AAEL018746	2.29826	4.24067	1.85016	2.29206	0.0219023	0.274398
AAEL013470	1174.59	0.218599	0.0953616	2.29232	0.0218874	0.274398
AAEL005313	611.671	0.299961	0.130849	2.29242	0.0218815	0.274398
AAEL014549	1810.66	0.248629	0.108444	2.29269	0.0218661	0.274398
AAEL013501	40.2597	-2.44663	1.06753	-2.29186	0.0219135	0.274398
AAEL003993	11172.9	0.49272	0.215022	2.29148	0.0219354	0.2744
AAEL011521	1584.35	0.405823	0.177202	2.29017	0.0220115	0.275078
AAEL001497	2056.03	0.220653	0.0964112	2.28866	0.0220988	0.275895
AAEL002267	29748	0.176441	0.0772316	2.28458	0.0223377	0.277155
AAEL001615	753.972	0.35357	0.154783	2.2843	0.022354	0.277155
AAEL013553	569.745	-0.274645	0.120201	-2.28489	0.0223192	0.277155
AAEL012096	25.1535	1.63222	0.714316	2.28501	0.0223124	0.277155
AAEL012139	105.547	-1.55322	0.679411	-2.28612	0.022247	0.277155
AAEL000605	1182.69	0.364674	0.159546	2.2857	0.0222718	0.277155
AAEL012234	5859.26	0.103558	0.0453298	2.28455	0.022339	0.277155
AAEL007971	246.082	-0.535624	0.234716	-2.28201	0.0224888	0.278408
AAEL000485	7614.66	0.178463	0.0782104	2.28183	0.0224994	0.278408
AAEL023141	4.82816	5.37731	2.35879	2.27969	0.0226259	0.279014
AAEL006787	87.8052	0.706539	0.309953	2.2795	0.0226371	0.279014
AAEL008384	104.911	0.619997	0.271863	2.28055	0.0225752	0.279014
AAEL010558	1879.75	0.301504	0.132226	2.28022	0.0225947	0.279014
AAEL006310	67.6584	-0.965609	0.423688	-2.27906	0.0226638	0.279068
AAEL020477	2905.45	0.292521	0.1285	2.27642	0.0228206	0.279358
AAEL013600	1079.34	-0.396068	0.173973	-2.2766	0.02281	0.279358
AAEL004277	3117.05	0.672429	0.295347	2.27675	0.0228014	0.279358
AAEL023478	79.8467	-0.943496	0.414402	-2.27676	0.0228004	0.279358
AAEL029057	7.94762	-17.1447	7.52712	-2.27773	0.0227428	0.279358
AAEL012906	47.6969	1.13184	0.49689	2.27784	0.0227359	0.279358
AAEL002531	329.046	-0.397746	0.174852	-2.27476	0.0229204	0.280307
AAEL012356	5.26079	-4.29035	1.88832	-2.27205	0.0230835	0.282027
AAEL005585	146.47	-0.578885	0.254961	-2.27049	0.023178	0.282569
AAEL022448	18.4973	1.56217	0.688015	2.27054	0.0231748	0.282569
AAEL000507	7.66139	-4.56329	2.01008	-2.2702	0.0231953	0.282569
AAEL019726	69.6653	-1.23984	0.546334	-2.26939	0.0232448	0.282897
AAEL013138	8373.54	0.274259	0.120879	2.26887	0.0232761	0.283005
AAEL009798	141.201	-0.606537	0.267382	-2.26843	0.023303	0.283058
AAEL005014	120.929	-0.733481	0.324118	-2.26301	0.0236353	0.286817
AAEL004869	474.866	-0.410715	0.181565	-2.26209	0.0236921	0.286972
AAEL011591	29.1403	-1.28895	0.569811	-2.26206	0.0236937	0.286972
AAEL023782	702.878	0.258013	0.114117	2.26095	0.0237627	0.28753
AAEL009544	62.1638	-0.990218	0.438401	-2.2587	0.0239019	0.288383
AAEL002115	1235.4	0.196541	0.0870071	2.25891	0.0238893	0.288383
AAEL009112	125.838	-0.631295	0.279481	-2.25881	0.0238949	0.288383
AAEL004073	35.392	-1.40134	0.620857	-2.2571	0.0240016	0.289308
AAEL026315	59.4249	0.656404	0.290989	2.25577	0.0240851	0.289872
AAEL019799	8046.65	-0.261813	0.116072	-2.25562	0.0240945	0.289872
AAEL025368	491.122	0.37297	0.165384	2.25517	0.0241224	0.28993
AAEL023729	436972	1.01811	0.451773	2.25359	0.0242217	0.290845
AAEL019839	132.807	-0.56134	0.249176	-2.25279	0.0242724	0.291176
AAEL017740	11.0576	-2.75088	1.22211	-2.25093	0.0243902	0.291754
AAEL007146	460.997	-0.66752	0.296514	-2.25123	0.0243711	0.291754
AAEL007342	25660.9	0.308736	0.137151	2.25107	0.024381	0.291754
AAEL022981	245.132	0.511426	0.22744	2.24861	0.024537	0.293232
AAEL024627	11.0239	-3.03321	1.35007	-2.24671	0.0246589	0.294408
AAEL011242	2723.41	0.443315	0.197433	2.24539	0.0247429	0.295131
AAEL013207	2095.23	0.333926	0.148883	2.24288	0.0249048	0.29678
AAEL019747	1263.54	-0.192281	0.0859339	-2.23754	0.0252508	0.300618
AAEL022731	4.8039	-4.51677	2.01991	-2.23612	0.0253438	0.301155
AAEL006196	17402.3	0.34317	0.153444	2.23646	0.0253219	0.301155
AAEL001167	342.573	-0.450062	0.201986	-2.22818	0.0258685	0.307099
AAEL023483	19.6712	-1.97183	0.885407	-2.22703	0.025945	0.307718
AAEL005013	4444.59	0.572108	0.256984	2.22625	0.0259978	0.308053
AAEL014096	122.512	-0.504697	0.226913	-2.22419	0.0261357	0.308524
AAEL023190	2.33116	3.6339	1.63377	2.22424	0.0261324	0.308524
AAEL004774	940.414	-0.252022	0.113292	-2.22454	0.0261123	0.308524
AAEL010498	267.99	-0.442428	0.198845	-2.22499	0.0260817	0.308524
AAEL010559	2281.69	0.222261	0.100011	2.22237	0.0262586	0.309438
AAEL026984	1067.37	0.562619	0.253168	2.22231	0.0262623	0.309438
AAEL021230	18.3339	-3.24009	1.45903	-2.22072	0.0263697	0.310121
AAEL002089	1181.17	-0.256525	0.115504	-2.22091	0.0263567	0.310121
AAEL009899	60.1623	-2.18814	0.985816	-2.21962	0.0264446	0.310712
AAEL005770	692.609	-0.545926	0.246021	-2.21902	0.0264852	0.310898
AAEL021795	24019.5	0.821204	0.370327	2.21751	0.0265883	0.311527
AAEL007465	216.676	-0.622878	0.280859	-2.21776	0.0265711	0.311527
AAEL000706	10359.6	0.606679	0.273679	2.21675	0.0266401	0.311843
AAEL003238	340.688	0.384558	0.173608	2.2151	0.0267535	0.31288
AAEL010627	23.448	-1.52596	0.689271	-2.21388	0.026837	0.313229
AAEL020002	5386.87	0.32045	0.144766	2.21356	0.0268589	0.313229
AAEL001400	343.101	-1.25941	0.568784	-2.21421	0.0268144	0.313229
AAEL012474	67.2806	0.807937	0.365052	2.21321	0.0268831	0.313229
AAEL008758	127.424	-0.620348	0.280791	-2.20929	0.0271548	0.316102
AAEL025684	1531.82	0.521853	0.236348	2.20799	0.0272453	0.316862
AAEL011234	37.082	-1.44654	0.655419	-2.20705	0.0273104	0.317113
AAEL001166	1117.82	0.345529	0.156564	2.20695	0.0273173	0.317113
AAEL001513	35.3095	1.80483	0.818061	2.20623	0.0273681	0.31741
AAEL029072	49.5809	-2.63185	1.19395	-2.20433	0.0275011	0.318365
AAEL024386	7.16809	4.5505	2.06406	2.20464	0.0274797	0.318365
AAEL022067	2623.9	0.618419	0.280634	2.20365	0.0275488	0.318623
AAEL001734	182.679	-0.759381	0.345014	-2.20101	0.0277352	0.320484
AAEL013281	37.9279	1.03554	0.470699	2.20001	0.0278065	0.321013
AAEL003526	86.6232	-0.684906	0.311699	-2.19733	0.0279967	0.322912
AAEL019810	27.3115	1.28544	0.585506	2.19543	0.0281324	0.324047
AAEL001886	211.362	-0.535885	0.244146	-2.19494	0.028168	0.324047
AAEL006488	1184.88	0.244261	0.111287	2.19488	0.0281724	0.324047
AAEL010120	5.13065	4.39118	2.00219	2.19319	0.0282937	0.324256
AAEL004900	1696.51	0.404556	0.184448	2.19334	0.0282831	0.324256
AAEL027361	813.539	0.310821	0.141709	2.19337	0.0282808	0.324256
AAEL024169	2.22572	4.01255	1.82876	2.19414	0.0282252	0.324256
AAEL001591	46.0641	-0.913488	0.416856	-2.19138	0.0284244	0.325457
AAEL001594	308.622	-1.01219	0.462079	-2.19051	0.0284875	0.325883
AAEL000505	957.679	-0.401584	0.183373	-2.18999	0.0285249	0.326014
AAEL003295	74.3678	0.718926	0.328703	2.18716	0.0287309	0.32787
AAEL019968	127.892	-0.562542	0.257216	-2.18704	0.0287395	0.32787
AAEL008788	306.114	-0.343344	0.157089	-2.18566	0.0288402	0.328721
AAEL005738	23.7537	-1.2219	0.559407	-2.18428	0.0289418	0.32958
AAEL004862	89.1273	-0.885351	0.405415	-2.18381	0.0289759	0.32967
AAEL019649	17.486	-2.65881	1.21773	-2.18342	0.0290047	0.329699
AAEL001918	232.27	-0.591341	0.270934	-2.1826	0.0290654	0.330091
AAEL010680	28.9606	-1.27093	0.582432	-2.18211	0.0291015	0.330202
AAEL017349	56955.2	0.46305	0.212245	2.18167	0.0291337	0.33027
AAEL001236	3352.78	0.326765	0.149894	2.17998	0.029259	0.330438
AAEL021645	528.718	-0.418109	0.191699	-2.18107	0.0291784	0.330438
AAEL008751	221.618	-2.14624	0.984443	-2.18015	0.029246	0.330438
AAEL004439	139.594	0.531223	0.243714	2.1797	0.02928	0.330438
AAEL001883	626.575	-0.216338	0.0992051	-2.18072	0.0292044	0.330438
AAEL001360	7140.84	0.188096	0.0863727	2.17773	0.029426	0.331788
AAEL014412	4760.26	-0.68315	0.313896	-2.17635	0.0295287	0.332526
AAEL008259	40.1768	-1.08578	0.498948	-2.17615	0.0295444	0.332526
AAEL002374	1460.65	0.351101	0.161367	2.17579	0.0295709	0.332527
AAEL017850	10.5526	-2.75271	1.26722	-2.17225	0.0298371	0.334346
AAEL001696	86.1805	2.63021	1.21076	2.17236	0.0298285	0.334346
AAEL021611	14.2922	2.16992	0.998863	2.17239	0.0298261	0.334346
AAEL009837	6528.46	0.366542	0.168741	2.17222	0.0298391	0.334346
AAEL006514	8483.79	0.285481	0.131445	2.17186	0.0298661	0.334352
AAEL027977	766.143	0.37502	0.172713	2.17134	0.0299054	0.334493
AAEL002925	700.86	0.283223	0.130509	2.17014	0.0299963	0.335212
AAEL001935	1670.21	0.201392	0.0928724	2.16848	0.0301223	0.335515
AAEL024436	133.457	0.527959	0.243503	2.16818	0.0301447	0.335515
AAEL005972	405.563	0.460191	0.21228	2.16785	0.0301701	0.335515
AAEL012940	2688.02	-0.330506	0.152404	-2.16863	0.0301111	0.335515
AAEL001281	316.398	-0.629723	0.290506	-2.16767	0.0301835	0.335515
AAEL022278	32.324	1.34641	0.621067	2.16789	0.0301668	0.335515
AAEL022129	386.368	-0.808694	0.373145	-2.16724	0.0302165	0.335584
AAEL007564	49.2687	-1.25455	0.579173	-2.1661	0.0303036	0.335959
AAEL009749	42.2318	-1.15993	0.53547	-2.16619	0.0302964	0.335959
AAEL028059	2.92591	-2.8285	1.30651	-2.16493	0.0303933	0.336321
AAEL010062	385.104	0.852702	0.393926	2.16462	0.0304165	0.336321
AAEL006862	6586.21	0.254088	0.117376	2.16473	0.0304083	0.336321
AAEL009056	96.4257	-0.762604	0.352379	-2.16416	0.030452	0.336417
AAEL003132	7.82471	-5.0686	2.34415	-2.16223	0.0306003	0.337759
AAEL001922	233.205	0.618524	0.286273	2.1606	0.0307259	0.338629
AAEL000017	29.0971	2.65308	1.22799	2.16051	0.0307331	0.338629
AAEL018133	1766.3	-0.213669	0.0989483	-2.1594	0.0308195	0.338987
AAEL021615	938.689	0.43765	0.202651	2.15963	0.0308017	0.338987
AAEL018700	714.458	-0.388337	0.179933	-2.15823	0.0309097	0.339682
AAEL007034	576.056	-0.435872	0.202066	-2.15708	0.0309995	0.340171
AAEL004592	390.824	0.761483	0.353034	2.15697	0.0310083	0.340171
AAEL005533	10.7717	5.67462	2.63243	2.15566	0.0311104	0.340881
AAEL002257	494.488	-0.459658	0.213312	-2.15486	0.0311727	0.340881
AAEL023502	122.883	0.586656	0.272262	2.15475	0.0311815	0.340881
AAEL013047	18585.4	0.203589	0.0944748	2.15496	0.0311651	0.340881
AAEL026299	112.724	-0.393882	0.18288	-2.15377	0.0312583	0.341424
AAEL028239	3684.67	0.368551	0.171201	2.15273	0.0313396	0.342015
AAEL001729	419.865	-0.28766	0.133686	-2.15176	0.031416	0.342551
AAEL013593	684.562	-0.358794	0.16686	-2.15028	0.0315334	0.343533
AAEL003847	380.289	-0.323861	0.150655	-2.14969	0.03158	0.343744
AAEL005604	189.869	-0.679428	0.316145	-2.1491	0.0316261	0.343948
AAEL005354	1569.76	0.182089	0.0847489	2.14857	0.0316689	0.344115
AAEL027602	2.71384	-5.05372	2.35312	-2.14766	0.0317405	0.344596
AAEL002465	1979.06	0.301987	0.140645	2.14716	0.0317804	0.344731
AAEL011197	271017	0.448981	0.209222	2.14596	0.0318763	0.345207
AAEL001200	997.832	-0.241566	0.11257	-2.14592	0.0318792	0.345207
AAEL028762	77.4556	-2.45381	1.14431	-2.14435	0.032005	0.346271
AAEL019454	14.777	2.90637	1.35602	2.1433	0.0320887	0.346834
AAEL020489	2582.52	-0.337443	0.157462	-2.14301	0.0321122	0.346834
AAEL003383	5382.21	0.172757	0.0806713	2.14149	0.0322342	0.347256
AAEL002389	401.126	0.275794	0.128785	2.1415	0.0322338	0.347256
AAEL019575	44.9293	1.02708	0.479564	2.1417	0.0322174	0.347256
AAEL024190	13.4935	-2.87853	1.34514	-2.13995	0.0323587	0.3483
AAEL004547	145.095	-0.542965	0.254006	-2.13761	0.0325483	0.349742
AAEL018056	1798.14	0.245297	0.114738	2.13789	0.0325253	0.349742
AAEL012102	726.738	-0.298782	0.139796	-2.13726	0.0325766	0.349746
AAEL019527	26.5647	1.32976	0.622398	2.13651	0.0326376	0.350103
AAEL001876	635.881	-0.434331	0.203327	-2.13612	0.0326697	0.350148
AAEL027316	5.7062	-4.85926	2.27606	-2.13494	0.0327661	0.350285
AAEL019935	497.253	-0.450776	0.211093	-2.13544	0.0327253	0.350285
AAEL006419	327.025	-0.338849	0.158711	-2.13501	0.0327602	0.350285
AAEL008620	100.003	-1.68409	0.790609	-2.13012	0.0331621	0.354217
AAEL009148	4090.55	0.265157	0.124518	2.12947	0.0332158	0.354489
AAEL002610	80.1333	-1.89144	0.88855	-2.12868	0.0332808	0.354882
AAEL006708	1964.04	0.387085	0.181873	2.12832	0.0333107	0.3549
AAEL007804	3039.92	-0.375795	0.17664	-2.12746	0.0333816	0.355355
AAEL024063	645.187	0.28469	0.133845	2.12701	0.0334189	0.35545
AAEL025259	254.607	-0.442754	0.20837	-2.12485	0.0335995	0.356467
AAEL011074	728.133	-0.331714	0.156091	-2.12513	0.0335757	0.356467
AAEL026259	5.47367	-2.74268	1.29065	-2.12504	0.0335834	0.356467
AAEL023178	47.5398	-0.603913	0.284704	-2.12119	0.0339056	0.358927
AAEL001320	94.4392	-0.757563	0.357086	-2.12151	0.0338786	0.358927
AAEL002837	474.567	-0.295209	0.13918	-2.12106	0.033917	0.358927
AAEL002703	2799.31	0.218363	0.103004	2.11994	0.034011	0.359106
AAEL004261	50.1508	0.93189	0.439506	2.12032	0.0339794	0.359106
AAEL021755	1855.94	-0.4101	0.193458	-2.11984	0.0340196	0.359106
AAEL004458	139.4	-0.386573	0.182422	-2.11912	0.0340807	0.359448
AAEL003135	304.539	-0.408925	0.193123	-2.11743	0.0342231	0.359758
AAEL009782	2123.22	0.446367	0.210807	2.11742	0.0342245	0.359758
AAEL006131	128.392	0.906991	0.428197	2.11816	0.0341613	0.359758
AAEL025888	20.2365	-2.20311	1.04032	-2.11774	0.0341975	0.359758
AAEL012091	1264.43	-0.388721	0.183733	-2.11568	0.0343717	0.360981
AAEL022578	236.362	-0.854131	0.403774	-2.11537	0.0343983	0.360981
AAEL025995	61.6796	-1.21669	0.575564	-2.11392	0.0345224	0.361179
AAEL027062	566.177	0.58565	0.277031	2.11403	0.0345131	0.361179
AAEL019450	3739.17	-0.193192	0.0913955	-2.1138	0.0345321	0.361179
AAEL004740	277.164	0.511679	0.24197	2.11464	0.0344607	0.361179
AAEL018111	417.012	0.300596	0.142242	2.11328	0.0345772	0.36135
AAEL004390	13.9023	-5.5842	2.64382	-2.11217	0.034672	0.361886
AAEL006607	5.13354	7.46294	3.53358	2.112	0.0346861	0.361886
AAEL008625	17.1173	-2.34958	1.11301	-2.11101	0.0347716	0.362478
AAEL004172	253.543	0.564993	0.2678	2.10976	0.0348791	0.363252
AAEL013648	37.2544	-1.68296	0.797809	-2.10947	0.0349036	0.363252
AAEL000667	83745	-0.497568	0.236123	-2.10724	0.0350972	0.364663
AAEL000554	50.8119	4.38466	2.08056	2.10744	0.0350793	0.364663
AAEL009429	296.304	0.303781	0.144236	2.10614	0.035192	0.365211
AAEL004124	1395.97	0.334562	0.158864	2.10596	0.0352081	0.365211
AAEL011973	48.4966	-1.10484	0.524971	-2.10456	0.0353292	0.365919
AAEL011707	209.77	-0.477884	0.227077	-2.1045	0.0353345	0.365919
AAEL025235	4.83956	4.33919	2.06516	2.10114	0.0356289	0.368395
AAEL019697	12.013	2.7849	1.32545	2.1011	0.0356322	0.368395
AAEL010633	529.857	-0.309579	0.147515	-2.09862	0.0358504	0.370346
AAEL014253	2538.54	0.236615	0.112939	2.09506	0.0361652	0.373292
AAEL000934	9908.36	0.163564	0.0781363	2.09331	0.0363211	0.374593
AAEL022200	3.02459	-5.23807	2.50279	-2.0929	0.0363585	0.374671
AAEL006556	14.4115	-1.53111	0.732628	-2.08989	0.0366279	0.376829
AAEL019451	697.495	-0.523114	0.250285	-2.09007	0.0366112	0.376829
AAEL021970	195.011	0.429725	0.205707	2.08901	0.0367065	0.377312
AAEL026052	13.7897	-2.34963	1.12492	-2.0887	0.0367348	0.377312
AAEL018306	124.851	-0.750793	0.359646	-2.08759	0.0368349	0.378031
AAEL026353	27.2741	-2.71677	1.30239	-2.08598	0.0369801	0.378779
AAEL026818	9.19083	-2.05485	0.985169	-2.08579	0.0369981	0.378779
AAEL020438	611.584	0.388741	0.186335	2.08624	0.0369566	0.378779
AAEL009858	69.1984	1.17097	0.56179	2.08436	0.0371275	0.379795
AAEL026155	2.46302	-2.0775	0.997098	-2.08354	0.0372017	0.379934
AAEL015293	146.6	0.519175	0.24917	2.08362	0.037195	0.379934
AAEL006312	17.8972	-2.24344	1.07717	-2.08271	0.0372775	0.3804
AAEL000149	523.302	0.342387	0.164524	2.08107	0.0374273	0.381476
AAEL026322	4.30993	-3.2586	1.56596	-2.08089	0.0374436	0.381476
AAEL003888	24634.2	0.49281	0.236868	2.08053	0.0374772	0.381509
AAEL009155	5935.01	0.266703	0.128431	2.07662	0.0378371	0.38342
AAEL028044	23.7136	-0.99237	0.477819	-2.07687	0.0378134	0.38342
AAEL008185	2313.91	0.379239	0.182633	2.07651	0.0378469	0.38342
AAEL001533	5014.22	0.730093	0.351416	2.07758	0.0377483	0.38342
AAEL002549	8.56481	-3.7058	1.78464	-2.0765	0.0378479	0.38342
AAEL023407	982.897	0.191449	0.0921436	2.07772	0.0377352	0.38342
AAEL004825	8.93343	3.59462	1.73276	2.0745	0.0380329	0.384983
AAEL001401	108.863	-1.33645	0.644478	-2.0737	0.0381074	0.385196
AAEL013526	64.1014	-1.1945	0.576048	-2.07361	0.0381151	0.385196
AAEL000910	133.668	-1.96924	0.950044	-2.07278	0.0381924	0.385666
AAEL007963	2432.79	-0.415215	0.200392	-2.07202	0.0382637	0.386076
AAEL010640	3514.25	0.565153	0.272833	2.07142	0.0383195	0.38633
AAEL023716	3277.52	-0.216951	0.104775	-2.07064	0.0383921	0.386751
AAEL012297	321.664	0.494546	0.239262	2.06696	0.0387376	0.389042
AAEL008527	42.3588	-1.75755	0.850144	-2.06736	0.0387007	0.389042
AAEL014507	2293.66	0.237673	0.11499	2.0669	0.0387433	0.389042
AAEL001587	608.83	-0.463327	0.224076	-2.06772	0.038666	0.389042
AAEL009811	1056.02	0.215236	0.104154	2.06651	0.03878	0.3891
AAEL019519	1218.98	-0.372236	0.180164	-2.0661	0.0388194	0.389185
AAEL008417	719.387	0.278602	0.134928	2.06483	0.0389395	0.389753
AAEL012911	300.215	-0.291306	0.141084	-2.06477	0.0389451	0.389753
AAEL014138	57.7534	-0.822788	0.398539	-2.06451	0.0389691	0.389753
AAEL001852	3550	-0.244432	0.118468	-2.06328	0.0390858	0.390017
AAEL020192	21.8331	-1.99526	0.96701	-2.06333	0.0390811	0.390017
AAEL001483	13.4571	1.97285	0.956186	2.06325	0.0390885	0.390017
AAEL024341	553.933	-0.386534	0.187389	-2.06273	0.0391378	0.390199
AAEL003106	3921.93	-0.15695	0.0761405	-2.06132	0.0392728	0.391234
AAEL027755	3473.63	-0.372831	0.18094	-2.06053	0.0393481	0.391364
AAEL000028	153.553	-0.716019	0.347468	-2.06067	0.0393341	0.391364
AAEL001116	321.188	-0.380995	0.184933	-2.06017	0.0393818	0.39139
AAEL018040	101.956	-0.95171	0.462333	-2.05849	0.0395427	0.392678
AAEL002834	9286.98	-0.298371	0.144975	-2.05808	0.0395823	0.392761
AAEL010619	263.525	-0.450921	0.219254	-2.05662	0.0397231	0.393847
AAEL007816	19881.3	0.292356	0.142182	2.05621	0.0397622	0.393924
AAEL005152	413.158	0.269401	0.131061	2.05554	0.0398267	0.394166
AAEL001540	3242.54	0.238777	0.116176	2.05531	0.0398492	0.394166
AAEL015335	230.243	0.509957	0.248197	2.05464	0.0399136	0.394492
AAEL014147	209.496	-0.348884	0.169928	-2.05313	0.0400596	0.39466
AAEL026545	210.345	-0.379764	0.184953	-2.0533	0.0400433	0.39466
AAEL026290	4.89336	-4.36741	2.12697	-2.05335	0.040039	0.39466
AAEL005355	870.935	0.262499	0.127871	2.05285	0.0400876	0.39466
AAEL013808	212.905	-0.644634	0.314011	-2.0529	0.0400821	0.39466
AAEL001378	585.172	0.427991	0.208756	2.05019	0.0403455	0.396888
AAEL010052	720.901	0.324098	0.158193	2.04875	0.040487	0.397658
AAEL014080	1636.88	0.365482	0.178375	2.04895	0.0404667	0.397658
AAEL019707	102.607	-0.575711	0.281052	-2.04842	0.0405193	0.397664
AAEL007827	884.523	-0.306839	0.149853	-2.0476	0.040599	0.398136
AAEL019988	3613.24	0.394125	0.192557	2.0468	0.0406776	0.398596
AAEL000543	97.2971	-0.78867	0.385489	-2.04589	0.0407668	0.398598
AAEL011790	526.949	0.262495	0.128314	2.04573	0.0407829	0.398598
AAEL010045	1052.26	0.222352	0.10866	2.0463	0.040727	0.398598
AAEL024306	21.1497	-1.36424	0.666946	-2.04551	0.0408046	0.398598
AAEL000092	5729.45	0.263514	0.128894	2.04443	0.040911	0.399327
AAEL002595	81.9882	-1.22627	0.600157	-2.04325	0.0410276	0.399402
AAEL027270	4.32369	-3.89054	1.90457	-2.04274	0.0410784	0.399402
AAEL001357	260.359	-0.417344	0.20437	-2.04211	0.041141	0.399402
AAEL017029	104.326	-1.29402	0.633473	-2.04273	0.0410787	0.399402
AAEL011890	259.936	-0.427983	0.209577	-2.04213	0.0411386	0.399402
AAEL014248	5350.78	0.392343	0.19204	2.04302	0.0410502	0.399402
AAEL002593	51.9168	-1.36996	0.670236	-2.044	0.0409539	0.399402
AAEL004521	235.533	-0.556071	0.272458	-2.04094	0.0412564	0.400212
AAEL018168	2005.49	-0.168127	0.0824062	-2.04023	0.0413276	0.400594
AAEL001472	277.812	-0.396276	0.194322	-2.03928	0.0414224	0.401204
AAEL008921	10935.1	0.217525	0.106769	2.03735	0.0416148	0.402596
AAEL002888	1234.67	0.358351	0.175904	2.0372	0.0416302	0.402596
AAEL003509	5130.57	0.168549	0.0827669	2.03643	0.0417072	0.40303
AAEL028088	1715.29	0.487961	0.239675	2.03592	0.041758	0.403212
AAEL014510	1178.75	0.722781	0.355104	2.03541	0.0418101	0.403404
AAEL022637	6.40143	-2.72554	1.33946	-2.03481	0.04187	0.403502
AAEL025819	50.1981	-0.653044	0.320958	-2.03467	0.0418843	0.403502
AAEL014871	2452.39	0.331841	0.16312	2.03434	0.0419173	0.40351
AAEL023198	3.96728	5.26035	2.5886	2.03212	0.042141	0.405044
AAEL004863	29.9429	-1.72494	0.84881	-2.03219	0.0421343	0.405044
AAEL020638	3392.02	-0.206945	0.101878	-2.0313	0.0422245	0.405536
AAEL024335	153.889	0.455061	0.224074	2.03085	0.0422703	0.405666
AAEL011017	7309.99	0.33385	0.164545	2.02893	0.0424651	0.406925
AAEL017082	1913.58	0.236246	0.116439	2.02892	0.0424662	0.406925
AAEL026310	1515.83	-0.225585	0.111274	-2.02729	0.0426324	0.407916
AAEL002563	861.122	0.233245	0.115053	2.02727	0.0426346	0.407916
AAEL008630	146.386	0.59654	0.294319	2.02685	0.042678	0.408021
AAEL002580	34.3265	-1.90804	0.941845	-2.02585	0.0427802	0.408688
AAEL001906	4435.6	0.293251	0.144851	2.0245	0.0429186	0.409699
AAEL021311	41.0561	0.72743	0.359596	2.02291	0.0430826	0.410787
AAEL011969	193.438	0.456536	0.225735	2.02244	0.0431307	0.410787
AAEL003535	826.874	0.226979	0.112218	2.02265	0.043109	0.410787
AAEL024613	94.6137	-1.52238	0.752871	-2.0221	0.0431662	0.410814
AAEL000785	396.934	0.296438	0.146673	2.02108	0.043271	0.4115
AAEL002514	452.682	0.324081	0.160407	2.02036	0.0433458	0.411589
AAEL024598	680.355	-0.357044	0.176718	-2.02042	0.0433402	0.411589
AAEL007246	418.166	0.467077	0.231391	2.01856	0.0435326	0.41305
AAEL018310	4002.92	-0.141798	0.0703073	-2.01683	0.0437131	0.41445
AAEL002167	8.46044	-3.11266	1.54457	-2.01522	0.0438818	0.41511
AAEL025729	311.08	0.583279	0.289368	2.0157	0.0438314	0.41511
AAEL017851	37.6067	-1.95563	0.970298	-2.01549	0.043853	0.41511
AAEL021886	3.72766	-5.06944	2.51686	-2.01419	0.0439892	0.415189
AAEL023192	40.8842	-0.640568	0.318026	-2.0142	0.0439885	0.415189
AAEL003890	4.65615	-5.8568	2.90722	-2.01457	0.0439499	0.415189
AAEL014406	578.595	-0.273716	0.135975	-2.01298	0.0441164	0.416078
AAEL026265	3.53178	-4.92342	2.44756	-2.01156	0.0442663	0.416554
AAEL002724	80.9051	0.9195	0.457045	2.01183	0.0442373	0.416554
AAEL003449	291.354	-0.488105	0.242618	-2.01182	0.0442385	0.416554
AAEL027040	1790.46	0.396356	0.197182	2.0101	0.0444205	0.417692
AAEL027731	475.588	-0.384841	0.191638	-2.00817	0.0446252	0.417742
AAEL018297	2529.46	-0.19983	0.0994824	-2.0087	0.0445691	0.417742
AAEL011567	4312.96	0.191849	0.0955149	2.00857	0.0445824	0.417742
AAEL002023	526.582	-0.900542	0.448361	-2.00852	0.0445883	0.417742
AAEL019734	814.755	0.547038	0.27224	2.0094	0.0444951	0.417742
AAEL021189	4.70457	-4.70552	2.34297	-2.00836	0.044605	0.417742
AAEL024939	174.72	-0.614105	0.306063	-2.00647	0.0448064	0.419126
AAEL021054	205.561	-0.476792	0.237717	-2.00571	0.0448868	0.419567
AAEL026776	105.199	0.601572	0.300128	2.00439	0.0450287	0.42058
AAEL013434	57.8395	-0.928284	0.463276	-2.00374	0.0450979	0.420914
AAEL009367	5226.35	0.218496	0.109063	2.0034	0.0451345	0.420943
AAEL003067	249.056	-0.500969	0.250103	-2.00306	0.0451714	0.420974
AAEL001938	2084.24	-0.479303	0.239348	-2.00254	0.0452268	0.421179
AAEL026144	36.3331	-1.04031	0.520343	-1.99929	0.0455773	0.422676
AAEL003322	2.65808	-6.01706	3.00913	-1.9996	0.0455433	0.422676
AAEL002357	119.909	-0.571269	0.285633	-2.00001	0.0454987	0.422676
AAEL000859	314241	0.649232	0.324883	1.99836	0.045678	0.422676
AAEL011095	245.301	0.445715	0.222931	1.99934	0.0455719	0.422676
AAEL019759	17.1345	1.42501	0.712614	1.99969	0.0455341	0.422676
AAEL021303	172.635	-0.477209	0.238803	-1.99834	0.0456795	0.422676
AAEL014972	594.369	0.738423	0.369531	1.99827	0.045687	0.422676
AAEL012217	418.733	1.1474	0.574204	1.99824	0.0456902	0.422676
AAEL026915	4766.08	-0.286488	0.143444	-1.99721	0.0458023	0.423054
AAEL024438	638.315	-0.682173	0.341558	-1.99724	0.0457993	0.423054
AAEL001205	7211.72	0.204461	0.102387	1.99694	0.045832	0.423054
AAEL005031	84.169	-0.743316	0.372335	-1.99636	0.0458945	0.42332
AAEL008149	271.184	0.521599	0.261364	1.99568	0.0459691	0.423697
AAEL008847	85.2368	-1.09273	0.547661	-1.99526	0.0460142	0.423803
AAEL009767	848.15	0.241964	0.121313	1.99453	0.0460938	0.424061
AAEL026551	131.053	-0.625466	0.313613	-1.99439	0.0461097	0.424061
AAEL006903	2320.64	-1.2253	0.615449	-1.9909	0.0464914	0.426947
AAEL024301	2.03007	-4.11519	2.06689	-1.99101	0.0464803	0.426947
AAEL025670	6.89782	-2.74291	1.37874	-1.98943	0.0466532	0.42812
AAEL009399	253.005	0.429239	0.215824	1.98884	0.0467189	0.42841
AAEL000502	167.978	0.515254	0.259276	1.98728	0.0468915	0.429381
AAEL019683	193.487	-0.551316	0.277468	-1.98696	0.0469273	0.429381
AAEL008174	209.937	0.700472	0.352481	1.98726	0.0468936	0.429381
AAEL008419	572.608	0.248639	0.125182	1.98621	0.0470096	0.429602
AAEL012176	142.276	-0.547595	0.275753	-1.98581	0.047054	0.429602
AAEL021981	9.10688	-2.18181	1.09868	-1.98585	0.0470498	0.429602
AAEL027202	282.67	-0.86216	0.434322	-1.98507	0.0471365	0.430044
AAEL021113	7097.83	0.149196	0.0752964	1.98145	0.0475411	0.431543
AAEL027737	7.70901	7.01051	3.53765	1.98169	0.0475144	0.431543
AAEL006665	2.69293	3.68642	1.8603	1.98163	0.0475211	0.431543
AAEL007956	4.7251	-4.80724	2.42395	-1.98322	0.0473425	0.431543
AAEL004067	11428.1	0.324706	0.163836	1.98189	0.0474916	0.431543
AAEL014501	627.069	0.234395	0.118238	1.9824	0.0474341	0.431543
AAEL025250	1398.7	0.393593	0.198568	1.98215	0.047462	0.431543
AAEL019892	27.3265	-1.3117	0.662223	-1.98075	0.0476188	0.431936
AAEL014134	6.76455	4.0541	2.04738	1.98014	0.0476879	0.431972
AAEL023073	16.6023	-0.847934	0.428293	-1.9798	0.0477258	0.431972
AAEL001500	115.526	-0.649642	0.328101	-1.98001	0.047703	0.431972
AAEL009415	895.485	0.235857	0.119187	1.97889	0.0478283	0.432588
AAEL008839	83.4136	-0.505122	0.255296	-1.97858	0.0478638	0.432598
AAEL002629	40.7807	-1.43901	0.727494	-1.97804	0.047924	0.432831
AAEL006786	7101.29	0.213509	0.107977	1.97736	0.0480014	0.433219
AAEL023187	3604.33	-0.412672	0.208736	-1.97701	0.0480409	0.433264
AAEL018351	4514.57	0.318302	0.161089	1.97594	0.0481616	0.434041
AAEL013262	489.288	0.94237	0.477085	1.97527	0.0482378	0.434181
AAEL007877	447.53	0.267018	0.135186	1.97519	0.0482462	0.434181
AAEL011888	7.97266	4.96256	2.51552	1.97278	0.0485207	0.43634
AAEL027576	46.6374	1.17935	0.598552	1.97035	0.0487988	0.438349
AAEL010598	691.48	0.211419	0.107324	1.96991	0.0488488	0.438349
AAEL005388	56.4508	-0.786447	0.399204	-1.97004	0.048834	0.438349
AAEL002084	1651.39	0.261887	0.133089	1.96775	0.0490968	0.44026
AAEL001132	3118.73	0.143885	0.0731346	1.9674	0.0491371	0.440307
AAEL023920	3.37522	-3.96753	2.01735	-1.96671	0.049217	0.44071
AAEL027119	3.40567	-4.65335	2.36688	-1.96603	0.0492957	0.4411
AAEL005777	9.98351	-2.44265	1.24265	-1.96568	0.0493356	0.441143
AAEL004738	5613.12	0.237716	0.120961	1.96523	0.0493878	0.441296
AAEL004833	2.25685	-4.90507	2.49809	-1.96352	0.0495854	0.442747
AAEL000342	160.332	-0.611745	0.311699	-1.96261	0.049691	0.442747
AAEL005690	1141.74	0.216746	0.11042	1.96293	0.049654	0.442747
AAEL003590	4643.04	-0.594743	0.302998	-1.96286	0.0496623	0.442747
AAEL000585	586.774	-0.665178	0.339047	-1.96191	0.0497732	0.443165
AAEL003589	5865.94	-0.643704	0.328451	-1.95982	0.0500173	0.445023
AAEL010340	10050.8	-0.187516	0.0957086	-1.95924	0.050085	0.44531
AAEL002791	863.743	0.220724	0.112679	1.95888	0.0501271	0.44537
AAEL001260	190.962	0.456922	0.233496	1.95687	0.0503626	0.44683
AAEL026530	17.7242	-1.9073	0.974546	-1.95711	0.0503343	0.44683
AAEL013496	38.35	-2.52912	1.29316	-1.95576	0.0504935	0.447442
AAEL022490	1581.62	0.194155	0.0992775	1.95568	0.0505027	0.447442
AAEL010571	150.547	-0.356835	0.182534	-1.9549	0.0505952	0.447631
AAEL022453	435.498	-3.36493	1.72116	-1.95503	0.050579	0.447631
AAEL003116	58.872	-1.28121	0.656379	-1.95193	0.0509465	0.450227
AAEL005708	129.617	-0.468218	0.239892	-1.95179	0.0509633	0.450227
AAEL005064	26.4499	-1.73573	0.889429	-1.95151	0.0509961	0.450227
AAEL011756	55623.6	0.402009	0.206224	1.94938	0.0512502	0.451252
AAEL026243	6619.5	0.156562	0.0803281	1.94903	0.0512917	0.451252
AAEL020221	71.2788	-0.822905	0.421979	-1.95011	0.0511633	0.451252
AAEL018322	564.339	-0.436766	0.224072	-1.94922	0.0512691	0.451252
AAEL013032	112.86	-0.790451	0.405409	-1.94976	0.0512047	0.451252
AAEL020983	500.935	0.72162	0.370378	1.94833	0.0513751	0.45167
AAEL020064	12.3965	1.7737	0.911074	1.94682	0.0515562	0.452945
AAEL006912	7147.97	0.406823	0.209144	1.94519	0.0517525	0.454352
AAEL021793	302.638	-0.346436	0.17815	-1.94463	0.0518191	0.454619
AAEL003299	7.88988	-4.39215	2.2604	-1.94309	0.0520054	0.454998
AAEL000939	100.802	0.594776	0.3061	1.94308	0.052007	0.454998
AAEL006572	3017.24	-0.230014	0.118369	-1.94319	0.0519937	0.454998
AAEL014318	581.865	-0.795426	0.4093	-1.94338	0.0519698	0.454998
AAEL026284	9.3129	3.12731	1.60977	1.9427	0.0520524	0.455079
AAEL018051	2305.72	0.187176	0.09637	1.94227	0.052105	0.455222
AAEL007632	5.38203	-4.45504	2.29476	-1.94139	0.0522108	0.45583
AAEL025231	60.4055	-0.621026	0.32027	-1.93907	0.0524924	0.457652
AAEL004064	605.294	0.310019	0.159871	1.93919	0.0524786	0.457652
AAEL013814	41.811	-1.06283	0.548595	-1.93737	0.0527004	0.458195
AAEL008152	6904.05	-0.221483	0.114294	-1.93783	0.052644	0.458195
AAEL006843	1605.04	-0.289265	0.149281	-1.93772	0.0526575	0.458195
AAEL002944	987.067	0.202085	0.104307	1.93742	0.0526944	0.458195
AAEL027364	21.8123	-1.29024	0.667247	-1.93367	0.0531538	0.46118
AAEL003413	58.742	-1.30708	0.675899	-1.93384	0.0531325	0.46118
AAEL017825	4.99233	-2.74167	1.41776	-1.93381	0.0531362	0.46118
AAEL025488	844.761	0.485107	0.250986	1.9328	0.0532603	0.461786
AAEL014212	2441.49	-0.198891	0.102962	-1.9317	0.0533969	0.462014
AAEL003837	671.007	-0.449996	0.232945	-1.93177	0.0533878	0.462014
AAEL005677	238.73	-0.360787	0.186717	-1.93226	0.0533273	0.462014
AAEL000140	558.784	-0.216581	0.112286	-1.92884	0.0537507	0.462561
AAEL008125	8.78091	-3.33838	1.7302	-1.92948	0.0536713	0.462561
AAEL020222	226.453	0.448148	0.232147	1.93045	0.0535516	0.462561
AAEL025376	169.565	-0.474977	0.246039	-1.93049	0.0535457	0.462561
AAEL009627	76.8732	-1.39547	0.723315	-1.92927	0.0536974	0.462561
AAEL002240	3231.94	0.228147	0.118254	1.9293	0.0536939	0.462561
AAEL002668	1133.2	0.406571	0.210762	1.92905	0.0537243	0.462561
AAEL012713	69.4104	-0.601353	0.311774	-1.92881	0.0537545	0.462561
AAEL012741	95.2768	-0.652711	0.338504	-1.92822	0.0538274	0.462872
AAEL001879	512.948	-0.362315	0.187938	-1.92785	0.0538739	0.462955
AAEL012841	1657.46	0.207442	0.107731	1.92555	0.054161	0.464787
AAEL027054	504.299	-0.267581	0.138946	-1.92579	0.0541304	0.464787
AAEL018289	4.0501	-6.00956	3.12182	-1.92502	0.0542272	0.465037
AAEL006235	2381.89	0.274047	0.142386	1.92468	0.0542694	0.465082
AAEL027653	40.2702	0.790826	0.411148	1.92346	0.0544222	0.466074
AAEL000460	1050.14	0.259831	0.135145	1.9226	0.0545304	0.466682
AAEL011709	261.548	-0.470559	0.244793	-1.92227	0.0545717	0.466718
AAEL021173	10.9645	-2.89737	1.50793	-1.92142	0.0546792	0.46732
AAEL003339	2.48753	-3.11027	1.61938	-1.92066	0.0547752	0.4676
AAEL024112	39.1874	-0.973162	0.506706	-1.92057	0.0547864	0.4676
AAEL001612	230.797	0.458438	0.238805	1.91972	0.0548934	0.468195
AAEL013549	211.891	-0.333181	0.173592	-1.91933	0.0549424	0.468295
AAEL009538	599.403	-0.421645	0.219753	-1.91872	0.0550193	0.468316
AAEL005951	59.0776	-1.83532	0.956501	-1.91878	0.0550118	0.468316
AAEL007316	29.0102	-1.63909	0.854501	-1.91818	0.0550883	0.468389
AAEL015255	1318.05	0.261416	0.136291	1.91807	0.0551024	0.468389
AAEL026276	28.5083	-1.96491	1.02685	-1.91354	0.0556795	0.472655
AAEL027350	227.998	-0.410447	0.214496	-1.91354	0.0556785	0.472655
AAEL008471	2737.53	0.342716	0.179153	1.91298	0.0557506	0.47294
AAEL000647	111045	-0.261203	0.136636	-1.91168	0.0559174	0.474034
AAEL011626	481.667	0.313716	0.164151	1.91115	0.0559858	0.474295
AAEL009487	9928.8	-0.742164	0.388671	-1.90949	0.0561989	0.474458
AAEL019592	118.882	-0.61966	0.32444	-1.90994	0.0561411	0.474458
AAEL024439	58.4795	0.71388	0.373865	1.90946	0.0562032	0.474458
AAEL010771	111.505	-0.542143	0.283958	-1.90924	0.0562315	0.474458
AAEL001778	669.189	0.258522	0.13535	1.91002	0.0561311	0.474458
AAEL014296	3982.25	0.176741	0.0925557	1.90957	0.0561891	0.474458
AAEL000923	8.35787	-4.84698	2.53973	-1.90846	0.0563313	0.474981
AAEL018139	4236.98	0.3471	0.181973	1.90742	0.0564663	0.4758
AAEL020371	35323.5	-0.394301	0.206814	-1.90655	0.0565792	0.476433
AAEL022827	962.221	0.280684	0.147352	1.90486	0.0567988	0.477962
AAEL021056	18.6706	-2.99869	1.57456	-1.90446	0.0568506	0.478078
AAEL001830	4506.52	0.125536	0.065936	1.90391	0.0569219	0.478357
AAEL004489	1211.46	-0.238004	0.12511	-1.90236	0.0571246	0.47942
AAEL004237	1385.65	0.24648	0.129557	1.90249	0.0571069	0.47942
AAEL003473	21.3029	-1.57732	0.829329	-1.90192	0.057181	0.479572
AAEL010205	6606.23	-0.246955	0.129882	-1.90137	0.0572531	0.479857
AAEL019854	1853.34	0.192263	0.101186	1.90009	0.0574215	0.48039
AAEL009883	4345.29	0.384023	0.202116	1.90001	0.0574313	0.48039
AAEL003125	4535.12	0.242818	0.127774	1.90038	0.0573839	0.48039
AAEL024003	124.711	-0.994772	0.523662	-1.89965	0.0574797	0.480475
AAEL001381	793.352	0.371768	0.195944	1.89731	0.0577867	0.482721
AAEL024419	543.669	0.476226	0.251077	1.89673	0.0578639	0.483044
AAEL022773	629.932	0.275387	0.145219	1.89635	0.0579134	0.483137
AAEL005092	3580	0.248656	0.131161	1.8958	0.0579858	0.48342
AAEL011776	3805.79	0.150114	0.0791956	1.89548	0.058029	0.48346
AAEL006609	4464.92	0.551325	0.291105	1.89391	0.0582373	0.484874
AAEL022698	676.464	-0.285398	0.150772	-1.89291	0.0583698	0.485164
AAEL001188	2087.49	0.167158	0.0882915	1.89325	0.0583243	0.485164
AAEL025997	14.2904	1.01189	0.534605	1.89277	0.058388	0.485164
AAEL003113	144.189	-0.526423	0.278358	-1.89118	0.0586008	0.486611
AAEL009032	91.6653	-0.630961	0.333835	-1.89004	0.0587531	0.486979
AAEL005030	262.362	0.525147	0.277868	1.88991	0.0587696	0.486979
AAEL027585	2.26271	-4.45257	2.35524	-1.89049	0.0586919	0.486979
AAEL006690	4.07839	-5.09947	2.69858	-1.88969	0.0588	0.486979
AAEL005315	6084.13	0.236915	0.125417	1.88903	0.0588882	0.487317
AAEL026975	108.827	-0.827574	0.43828	-1.88823	0.058995	0.487317
AAEL008833	486.929	-0.275475	0.145913	-1.88793	0.0590347	0.487317
AAEL006035	707.161	-0.4178	0.221252	-1.88834	0.0589799	0.487317
AAEL007407	1335.55	-0.367558	0.194668	-1.88813	0.0590083	0.487317
AAEL025521	802.298	0.265397	0.140719	1.88601	0.0592942	0.487533
AAEL010138	103.432	-0.559901	0.296657	-1.88737	0.0591107	0.487533
AAEL000832	1523.88	-0.182676	0.096888	-1.88544	0.059371	0.487533
AAEL011716	2.24353	5.37998	2.85319	1.8856	0.0593485	0.487533
AAEL018126	4500.99	0.210246	0.111487	1.88583	0.0593172	0.487533
AAEL002546	102.596	-0.598423	0.31729	-1.88604	0.059289	0.487533
AAEL009554	3.36605	-4.89774	2.59694	-1.88597	0.0592996	0.487533
AAEL005599	85.2845	-0.643135	0.341058	-1.88571	0.0593345	0.487533
AAEL010854	1939.47	0.3759	0.199475	1.88444	0.059505	0.487995
AAEL012038	662.104	-0.308031	0.163458	-1.88447	0.0595014	0.487995
AAEL019699	1674.76	0.242358	0.128656	1.88376	0.059597	0.4883
AAEL004814	2792.63	-0.425436	0.225864	-1.88359	0.0596198	0.4883
AAEL011212	658.992	-0.258318	0.1372	-1.88278	0.05973	0.488884
AAEL024174	13.5938	1.13217	0.601861	1.88112	0.0599557	0.489239
AAEL023348	2704.02	0.42448	0.225903	1.87904	0.0602393	0.489239
AAEL010437	276.865	-0.371353	0.197504	-1.88023	0.0600769	0.489239
AAEL017098	101.079	-2.95832	1.57408	-1.87939	0.0601909	0.489239
AAEL026878	48.0924	-1.74991	0.931281	-1.87903	0.0602404	0.489239
AAEL013271	5.17145	4.3249	2.30072	1.87981	0.0601346	0.489239
AAEL015533	51.2042	-1.30463	0.693203	-1.88203	0.0598322	0.489239
AAEL005470	286.708	0.336515	0.178876	1.88128	0.0599344	0.489239
AAEL005312	127.407	-0.664991	0.353562	-1.88083	0.0599947	0.489239
AAEL025084	8.1844	2.65715	1.41384	1.87939	0.0601916	0.489239
AAEL028134	94.0972	0.427275	0.227378	1.87915	0.0602247	0.489239
AAEL010850	4421.2	-0.208175	0.110712	-1.88033	0.0600628	0.489239
AAEL006409	1228.23	0.174344	0.0928058	1.87859	0.0603006	0.489412
AAEL017023	55.471	-1.76826	0.941694	-1.87774	0.0604166	0.490037
AAEL010053	173.841	-0.520505	0.277289	-1.87712	0.0605015	0.49041
AAEL000850	19.4997	-1.52877	0.814799	-1.87626	0.0606201	0.490782
AAEL010761	1136.69	0.155851	0.0830667	1.87622	0.0606255	0.490782
AAEL023541	25.7121	-0.832859	0.443971	-1.87593	0.0606648	0.490784
AAEL000185	27487.4	-0.190264	0.101518	-1.87419	0.0609045	0.492406
AAEL026534	194.475	0.40938	0.218513	1.87348	0.0610019	0.492877
AAEL000385	900.872	-0.302694	0.161738	-1.87151	0.0612749	0.494104
AAEL011174	9.89423	2.57457	1.37586	1.87125	0.061311	0.494104
AAEL010892	768.969	-0.23943	0.127907	-1.87191	0.0612188	0.494104
AAEL013887	769.096	0.208661	0.11148	1.87174	0.0612426	0.494104
AAEL000970	1309.21	0.277411	0.148348	1.87	0.0614841	0.495182
AAEL000476	60.4471	0.720995	0.385758	1.86903	0.061618	0.495942
AAEL005593	1306.67	-0.212728	0.113938	-1.86706	0.0618939	0.497788
AAEL003887	2347.38	0.197073	0.105598	1.86625	0.0620057	0.497788
AAEL013471	167.191	-0.42192	0.22602	-1.86674	0.0619375	0.497788
AAEL024681	549.047	-0.223316	0.11966	-1.86626	0.0620048	0.497788
AAEL009171	5453.66	-0.425336	0.228072	-1.86492	0.0621929	0.498049
AAEL005070	480.12	0.233928	0.125415	1.86524	0.0621478	0.498049
AAEL012610	7759.51	0.231733	0.124261	1.86489	0.0621966	0.498049
AAEL021756	65.4805	-0.993456	0.532517	-1.86558	0.0620997	0.498049
AAEL011192	1526.27	0.196366	0.105332	1.86427	0.0622845	0.498146
AAEL001511	833.767	0.910408	0.488624	1.86321	0.062433	0.498146
AAEL000094	8.3667	-3.37527	1.81154	-1.8632	0.0624335	0.498146
AAEL013851	8.8363	3.83734	2.05964	1.86311	0.0624465	0.498146
AAEL024387	13.1121	-4.27188	2.29278	-1.86319	0.0624357	0.498146
AAEL000600	17.1004	-2.45971	1.31964	-1.86392	0.0623324	0.498146
AAEL010284	5527.47	0.390133	0.209482	1.86237	0.0625516	0.49835
AAEL002864	629.225	-0.255008	0.136948	-1.86209	0.0625911	0.49835
AAEL007303	466.897	-0.2793	0.149988	-1.86215	0.0625823	0.49835
AAEL021364	34.5033	0.598087	0.321285	1.86154	0.0626673	0.498641
AAEL014797	19678.3	0.329278	0.177168	1.85856	0.063089	0.500551
AAEL014734	102018	0.374791	0.201654	1.85859	0.0630858	0.500551
AAEL008938	1909.09	0.160614	0.0864219	1.85849	0.0630997	0.500551
AAEL002159	243.87	-0.332694	0.179018	-1.85844	0.0631063	0.500551
AAEL012064	77.2192	-0.583034	0.313692	-1.85862	0.0630813	0.500551
AAEL013967	2059.05	0.260106	0.140049	1.85725	0.0632752	0.501546
AAEL008134	61854.3	0.28623	0.154136	1.857	0.0633116	0.501546
AAEL023600	51.5025	-1.42222	0.766175	-1.85627	0.0634157	0.502055
AAEL008106	96.5069	-1.396	0.752449	-1.85527	0.0635572	0.50222
AAEL006835	666.893	0.353183	0.190412	1.85483	0.0636203	0.50222
AAEL007472	1197.81	-0.271527	0.146355	-1.85527	0.063558	0.50222
AAEL007962	3183.14	-0.295072	0.159093	-1.85472	0.0636364	0.50222
AAEL010728	1486.75	-0.187877	0.101276	-1.85511	0.0635806	0.50222
AAEL015051	27.4669	-1.76706	0.952934	-1.85434	0.0636903	0.50233
AAEL000226	751.425	0.233211	0.125805	1.85375	0.0637755	0.502687
AAEL009701	48.0597	-0.68674	0.370589	-1.8531	0.0638674	0.503096
AAEL021703	2024.7	0.259224	0.139917	1.85269	0.0639261	0.503243
AAEL008027	1328.12	0.5948	0.321173	1.85196	0.0640313	0.503756
AAEL000106	345.917	0.344255	0.185947	1.85136	0.0641176	0.504119
AAEL009150	21757	0.382484	0.206727	1.85019	0.0642865	0.504565
AAEL003467	35.0875	-1.63236	0.882428	-1.84985	0.0643346	0.504565
AAEL014909	17.3936	-2.29415	1.24034	-1.84961	0.0643697	0.504565
AAEL014062	248.322	0.284793	0.153967	1.8497	0.0643567	0.504565
AAEL020299	3.67642	-3.5204	1.90392	-1.84903	0.0644533	0.504565
AAEL020012	96.6923	-0.563984	0.305018	-1.84902	0.0644553	0.504565
AAEL014050	681.324	0.297757	0.160987	1.84957	0.0643763	0.504565
AAEL010311	2561.49	-0.170834	0.0924082	-1.84869	0.0645021	0.504617
AAEL025031	3.2125	-3.12991	1.69367	-1.84801	0.0646013	0.504766
AAEL006023	21505.2	0.289442	0.156617	1.84808	0.0645903	0.504766
AAEL024342	237.026	-0.500328	0.270783	-1.84771	0.064645	0.504793
AAEL011251	1105.88	0.212843	0.115224	1.84721	0.0647167	0.505039
AAEL011643	349.326	-0.405406	0.219563	-1.84643	0.0648303	0.505612
AAEL005224	307.203	-0.335745	0.181925	-1.84552	0.0649626	0.505677
AAEL021164	7.1837	-2.13738	1.15831	-1.84526	0.0649995	0.505677
AAEL006973	533.744	-0.426091	0.230848	-1.84576	0.0649264	0.505677
AAEL001501	3303.38	0.180893	0.0980057	1.84574	0.0649303	0.505677
AAEL000953	2005.96	0.222487	0.120614	1.84463	0.0650919	0.505769
AAEL014059	5631.23	0.172466	0.0934889	1.84477	0.0650709	0.505769
AAEL024441	1395.47	0.424896	0.230658	1.8421	0.06546	0.507689
AAEL000938	310.127	0.383292	0.208055	1.84226	0.065437	0.507689
AAEL022760	3.46062	3.56517	1.93511	1.84236	0.0654223	0.507689
AAEL014827	999.541	-0.251151	0.136401	-1.84127	0.0655819	0.508149
AAEL025438	589.896	-0.395149	0.214621	-1.84115	0.0656002	0.508149
AAEL021502	11.1802	2.38332	1.29511	1.84024	0.0657331	0.508552
AAEL005363	9.96233	-2.62474	1.42624	-1.84032	0.0657209	0.508552
AAEL007938	34.0092	1.67619	0.911254	1.83943	0.0658522	0.508597
AAEL014628	779.188	0.200128	0.108802	1.83937	0.0658603	0.508597
AAEL000119	561.822	-0.338317	0.183918	-1.8395	0.065842	0.508597
AAEL024564	3.58216	2.40999	1.3108	1.83856	0.0659801	0.508897
AAEL018235	1576.3	-0.27423	0.149137	-1.83878	0.0659472	0.508897
AAEL026995	1789.29	-0.210219	0.114382	-1.83787	0.0660822	0.509372
AAEL005813	1941.73	-0.305193	0.166167	-1.83667	0.0662585	0.509793
AAEL027560	902.121	-0.248592	0.135314	-1.83715	0.0661883	0.509793
AAEL003039	8266.32	-0.267842	0.145819	-1.83681	0.0662378	0.509793
AAEL027940	76.1865	-0.65299	0.355936	-1.83457	0.0665692	0.51187
AAEL005336	47391.9	0.512424	0.279363	1.83426	0.0666159	0.511917
AAEL022099	11.2698	1.68004	0.916341	1.83342	0.0667405	0.51243
AAEL005478	198.799	0.47648	0.259909	1.83326	0.0667642	0.51243
AAEL004790	1207.4	-0.210515	0.114868	-1.83267	0.0668517	0.512788
AAEL002258	707.545	0.20942	0.114333	1.83167	0.067001	0.51362
AAEL026070	3.22328	5.08241	2.77575	1.83101	0.0670995	0.514061
AAEL000733	2.29533	5.4111	2.95758	1.82957	0.0673145	0.515395
AAEL002559	44.7641	-1.04694	0.57236	-1.82916	0.0673763	0.515554
AAEL025603	14.6265	1.853	1.01347	1.82836	0.0674948	0.516147
AAEL009205	5.19321	6.86147	3.754	1.82778	0.067583	0.516193
AAEL006917	5145.46	-0.173046	0.0946749	-1.82779	0.0675814	0.516193
AAEL014655	63.6991	-0.723356	0.396031	-1.82651	0.0677729	0.517145
AAEL003373	4574.97	-0.430462	0.235689	-1.8264	0.0677899	0.517145
AAEL026244	113.96	-0.534809	0.293152	-1.82434	0.0681011	0.517884
AAEL019986	4703.98	-0.195279	0.10707	-1.82385	0.0681752	0.517884
AAEL006407	74.2608	0.623962	0.341983	1.82454	0.0680709	0.517884
AAEL012114	485.302	-0.409211	0.224263	-1.82469	0.0680474	0.517884
AAEL004132	931.561	0.218273	0.119599	1.82504	0.0679951	0.517884
AAEL021107	86.3902	-0.446037	0.244527	-1.82408	0.0681397	0.517884
AAEL006315	7543.73	0.161892	0.0886942	1.82528	0.0679586	0.517884
AAEL012868	4.32751	-4.53633	2.48764	-1.82355	0.0682203	0.517914
AAEL004356	1136.48	-0.297622	0.16336	-1.82188	0.0684736	0.519293
AAEL017514	4749.71	-0.680232	0.373383	-1.82181	0.0684845	0.519293
AAEL003043	18.6969	-1.24513	0.68369	-1.82119	0.0685774	0.519435
AAEL023574	725.197	-0.195093	0.107136	-1.82099	0.0686085	0.519435
AAEL000642	172.891	-0.500835	0.275053	-1.82087	0.0686272	0.519435
AAEL001893	107.015	-0.599185	0.329143	-1.82044	0.0686923	0.519615
AAEL023973	249.663	0.754351	0.414662	1.8192	0.0688812	0.520731
AAEL007654	198.453	-0.485729	0.267111	-1.81846	0.0689944	0.520838
AAEL002665	228.824	-0.46462	0.25546	-1.81876	0.0689486	0.520838
AAEL019931	165.01	-0.499414	0.274672	-1.81822	0.0690309	0.520838
AAEL011554	5952.71	0.161068	0.0885952	1.81802	0.0690611	0.520838
AAEL010074	897.507	0.286185	0.157484	1.81724	0.0691808	0.521428
AAEL001496	1719.68	0.172079	0.0947224	1.81667	0.0692679	0.521556
AAEL025853	90.1473	-0.699289	0.384947	-1.81658	0.0692808	0.521556
AAEL022999	2.66019	-4.58318	2.52428	-1.81564	0.0694257	0.522334
AAEL002351	1556.6	-0.19856	0.109419	-1.81467	0.0695745	0.52245
AAEL024710	2358.34	-0.254888	0.140465	-1.8146	0.0695852	0.52245
AAEL022941	2097.15	-0.166653	0.0918209	-1.81498	0.0695266	0.52245
AAEL006142	470.443	-0.361591	0.199283	-1.81446	0.0696074	0.52245
AAEL006174	4329.72	0.215935	0.119031	1.8141	0.0696622	0.52255
AAEL011004	468.864	-0.587999	0.324191	-1.81374	0.0697172	0.52265
AAEL008876	39586.9	0.744888	0.410816	1.81319	0.0698024	0.522977
AAEL005918	4750.37	0.309567	0.170775	1.81272	0.0698753	0.523212
AAEL002499	403.682	0.626325	0.345587	1.81235	0.0699316	0.523321
AAEL015465	13.0843	-2.33038	1.28607	-1.81202	0.0699825	0.52339
AAEL024079	5.45732	-3.21337	1.77372	-1.81166	0.0700391	0.523503
AAEL026577	14.6001	-1.29374	0.71441	-1.81092	0.070153	0.523732
AAEL010524	1426.13	-0.306081	0.169018	-1.81094	0.0701505	0.523732
AAEL019463	19862.6	0.453338	0.250435	1.8102	0.0702649	0.524255
AAEL025966	119.592	-0.567863	0.313833	-1.80944	0.070382	0.524818
AAEL013903	266.871	-0.3722	0.205764	-1.80887	0.0704712	0.525171
AAEL015458	296.145	-1.15982	0.641359	-1.80838	0.0705468	0.525423
AAEL020929	326.072	-0.342484	0.189513	-1.80718	0.0707343	0.526064
AAEL025964	97.238	0.701539	0.388286	1.80676	0.0708002	0.526064
AAEL015314	8536.11	0.165047	0.0913483	1.80679	0.0707956	0.526064
AAEL008671	3650.43	0.203987	0.112865	1.80736	0.0707064	0.526064
AAEL001844	1302.9	-0.300516	0.166361	-1.80642	0.0708535	0.526149
AAEL020851	400.735	0.257469	0.142641	1.80502	0.0710722	0.527462
AAEL011740	167.824	-0.839993	0.465634	-1.80398	0.0712347	0.528044
AAEL008798	31.7078	-1.32812	0.736167	-1.80409	0.0712165	0.528044
AAEL014821	18702.9	0.384399	0.213178	1.80319	0.0713591	0.528655
AAEL012202	357.28	-0.219108	0.121538	-1.8028	0.0714195	0.52879
AAEL011612	5.09794	-3.1478	1.7468	-1.80204	0.0715393	0.529366
AAEL023076	373.113	-0.339598	0.188658	-1.80007	0.071849	0.530409
AAEL001894	4.10581	-4.53376	2.5176	-1.80082	0.0717305	0.530409
AAEL008157	2811.3	0.410949	0.228271	1.80027	0.0718181	0.530409
AAEL009058	62.3171	0.548751	0.304808	1.80032	0.0718103	0.530409
AAEL008138	228.369	-0.477068	0.265174	-1.79907	0.072007	0.531263
AAEL008356	3713.04	0.272672	0.151639	1.79817	0.0721503	0.532008
AAEL015526	75.5146	-0.566985	0.315497	-1.79712	0.0723168	0.532923
AAEL003464	145.567	-0.402848	0.224239	-1.79651	0.0724129	0.533319
AAEL028144	112.95	-1.40365	0.781483	-1.79613	0.0724733	0.533451
AAEL027068	946.267	-2.81295	1.56685	-1.79529	0.072608	0.533505
AAEL013092	5083.79	0.221524	0.123385	1.79538	0.0725932	0.533505
AAEL000656	782.174	0.315405	0.175685	1.79529	0.072608	0.533505
AAEL028236	468.054	0.291855	0.162671	1.79414	0.0727908	0.534536
AAEL002501	13775.6	0.170995	0.0953612	1.79313	0.0729515	0.534795
AAEL012360	180.187	-0.379574	0.211683	-1.79312	0.0729536	0.534795
AAEL026797	510.337	0.486719	0.271409	1.79331	0.0729241	0.534795
AAEL009876	87.43	-0.732972	0.408913	-1.79249	0.0730548	0.535224
AAEL025976	1635	-0.294343	0.164366	-1.79077	0.0733297	0.535462
AAEL003701	1088.44	0.179729	0.100364	1.79077	0.0733298	0.535462
AAEL009265	2359.52	-0.262038	0.146245	-1.79177	0.0731694	0.535462
AAEL027289	635.302	0.285547	0.159418	1.79119	0.0732634	0.535462
AAEL013517	8.65688	3.29715	1.84155	1.79043	0.0733854	0.535462
AAEL002016	1566.09	0.320967	0.179237	1.79074	0.0733347	0.535462
AAEL015575	4264.32	-0.196664	0.109842	-1.79044	0.073384	0.535462
AAEL007106	10.7457	-2.9717	1.66013	-1.79003	0.0734483	0.53561
AAEL025089	17.3314	-1.52567	0.852817	-1.78898	0.0736188	0.535653
AAEL020230	51.2997	-0.895467	0.500558	-1.78894	0.0736246	0.535653
AAEL015216	971.983	-0.364497	0.203745	-1.78898	0.0736173	0.535653
AAEL025255	4.44999	4.09809	2.2902	1.78941	0.0735494	0.535653
AAEL011399	452.786	-0.266126	0.148833	-1.78809	0.0737616	0.536339
AAEL007097	81.8411	-2.94005	1.64622	-1.78594	0.0741089	0.538553
AAEL011082	281.365	-0.402507	0.225492	-1.78502	0.0742587	0.53933
AAEL006611	2507.14	0.207723	0.116416	1.78431	0.0743734	0.539791
AAEL011162	557.971	0.219231	0.122881	1.7841	0.074408	0.539791
AAEL012621	13213.6	-0.130687	0.0733088	-1.78269	0.0746371	0.540637
AAEL000255	61.0688	0.750385	0.421078	1.78206	0.0747396	0.540637
AAEL018226	985.76	-0.204076	0.114486	-1.78255	0.07466	0.540637
AAEL001277	5646.49	-0.293638	0.16473	-1.78254	0.0746618	0.540637
AAEL005412	39.5505	-0.751664	0.42175	-1.78225	0.0747087	0.540637
AAEL008528	2472.32	-0.203464	0.114244	-1.78097	0.0749172	0.54161
AAEL025389	2.42154	-5.22781	2.93718	-1.77987	0.0750968	0.541973
AAEL010342	114.704	-1.0722	0.602362	-1.78	0.075076	0.541973
AAEL002343	45.4387	-0.836093	0.469689	-1.7801	0.0750598	0.541973
AAEL011328	1893.33	-0.237815	0.133723	-1.77841	0.0753367	0.543392
AAEL017664	27.9828	-1.60545	0.902926	-1.77805	0.0753952	0.543502
AAEL010468	288.216	0.362363	0.203966	1.77659	0.0756358	0.544924
AAEL025237	1024.51	0.278391	0.156724	1.77631	0.075682	0.544945
AAEL004475	2372.27	0.24314	0.136957	1.7753	0.0758481	0.545829
AAEL014425	86.195	-0.768557	0.433195	-1.77416	0.0760371	0.546852
AAEL001569	5431.47	0.133401	0.0752013	1.77391	0.0760773	0.546852
AAEL023306	43.0971	-1.71153	0.965336	-1.77299	0.0762305	0.547453
AAEL007500	23.6564	-1.73444	0.979184	-1.77131	0.0765094	0.547453
AAEL021510	35.8885	-0.790825	0.44622	-1.77228	0.0763486	0.547453
AAEL003885	531.083	-0.289561	0.163455	-1.7715	0.0764778	0.547453
AAEL009906	12.0577	-2.06179	1.16311	-1.77265	0.0762871	0.547453
AAEL003735	800.767	-0.190674	0.107639	-1.77142	0.0764903	0.547453
AAEL020182	44.6361	0.774059	0.436832	1.77198	0.0763975	0.547453
AAEL022844	8.92369	3.7207	2.10008	1.77169	0.076446	0.547453
AAEL010371	1430.75	0.247578	0.139841	1.77042	0.0766565	0.547763
AAEL023189	9.0034	-2.25969	1.27666	-1.77	0.0767269	0.547763
AAEL006832	358.472	-0.420364	0.237493	-1.77001	0.0767259	0.547763
AAEL008591	2216.98	-0.258419	0.145952	-1.77057	0.0766317	0.547763
AAEL010430	1393.22	0.246737	0.139426	1.76967	0.0767829	0.54777
AAEL026491	48.0057	-0.731232	0.413249	-1.76947	0.076815	0.54777
AAEL020203	1108.57	-0.23836	0.134791	-1.76837	0.0769999	0.548777
AAEL000943	184.354	0.382061	0.216122	1.7678	0.0770939	0.549136
AAEL000254	6.64884	3.33723	1.88846	1.76717	0.0771992	0.549574
AAEL006563	943.347	2.5602	1.44909	1.76677	0.0772676	0.54975
AAEL005729	267.139	-0.511366	0.289561	-1.766	0.0773951	0.550346
AAEL006886	1587.03	-0.531754	0.301246	-1.76518	0.0775334	0.551018
AAEL000292	132.826	-0.388198	0.219956	-1.76489	0.0775823	0.551053
AAEL001128	252.739	-0.40749	0.230981	-1.76417	0.0777033	0.55129
AAEL021751	1202.12	-0.214184	0.121405	-1.76421	0.0776967	0.55129
AAEL019703	5.80055	-3.37909	1.91673	-1.76295	0.0779098	0.551821
AAEL005415	1680.24	0.183258	0.103943	1.76306	0.0778903	0.551821
AAEL014361	169.115	-0.477269	0.270656	-1.76338	0.0778369	0.551821
AAEL002417	2575	-0.218679	0.124082	-1.76237	0.078007	0.552198
AAEL009340	778.805	-0.351189	0.199344	-1.76172	0.0781162	0.552349
AAEL026118	14950.2	0.174114	0.0988265	1.76181	0.0781012	0.552349
AAEL025017	1041.03	-0.163862	0.0930293	-1.7614	0.0781704	0.552422
AAEL005234	255.982	-0.355225	0.201749	-1.76073	0.078284	0.552914
AAEL001416	1879.72	0.155897	0.0885679	1.7602	0.0783747	0.553243
AAEL001715	15649.9	0.245737	0.139642	1.75977	0.0784467	0.553441
AAEL000064	14.4837	-2.62096	1.49001	-1.75902	0.0785737	0.554026
AAEL022775	6.08457	-2.70247	1.5373	-1.75793	0.0787595	0.555025
AAEL007789	17.523	3.09839	1.76346	1.757	0.0789179	0.55518
AAEL027126	18.3005	1.02111	0.581244	1.75676	0.0789582	0.55518
AAEL004577	179.273	-0.398323	0.226651	-1.75743	0.0788453	0.55518
AAEL004987	6.92659	-3.41369	1.94293	-1.75698	0.0789216	0.55518
AAEL013828	1546.2	0.190215	0.108306	1.75628	0.0790407	0.55545
AAEL022233	54.876	-0.516491	0.294195	-1.75561	0.0791555	0.555792
AAEL004897	5.73894	-3.4905	1.98864	-1.75522	0.079222	0.555792
AAEL009055	7308.69	0.26717	0.152208	1.7553	0.0792077	0.555792
AAEL007371	25.5447	-1.76942	1.00875	-1.75406	0.0794197	0.556413
AAEL025442	16.9388	1.06327	0.606315	1.75367	0.0794876	0.556413
AAEL025040	82.5465	1.03504	0.5902	1.75372	0.0794792	0.556413
AAEL006283	181.338	-0.485043	0.276514	-1.75414	0.0794071	0.556413
AAEL010478	1639.22	-0.359597	0.205301	-1.75156	0.0798492	0.558553
AAEL000159	3504.32	0.160836	0.0918344	1.75137	0.0798821	0.558553
AAEL000744	2248.74	-0.24118	0.137747	-1.7509	0.0799632	0.558809
AAEL002863	458.817	0.198613	0.113514	1.74968	0.0801743	0.559744
AAEL023490	6991.18	-1.47726	0.844336	-1.74961	0.080186	0.559744
AAEL001691	212.877	-0.790058	0.45203	-1.7478	0.0804986	0.561614
AAEL006081	833.273	0.241949	0.138489	1.74706	0.0806271	0.56204
AAEL006682	43.3309	-0.810543	0.464049	-1.74667	0.0806938	0.56204
AAEL005473	108.875	-0.527985	0.302265	-1.74676	0.0806782	0.56204
AAEL002272	2766.72	0.21048	0.120549	1.74602	0.0808082	0.562525
AAEL027002	2117	0.2643	0.151613	1.74326	0.0812883	0.563264
AAEL024349	2.98934	-2.34002	1.34265	-1.74284	0.0813623	0.563264
AAEL005277	8433.15	0.136364	0.0782408	1.74288	0.0813545	0.563264
AAEL004485	5605.14	0.119133	0.0682952	1.74438	0.0810927	0.563264
AAEL023349	496.794	-0.395754	0.227037	-1.74313	0.0813114	0.563264
AAEL012265	2784.18	0.610691	0.349989	1.74489	0.0810045	0.563264
AAEL024824	1752.22	0.38699	0.221805	1.74473	0.0810314	0.563264
AAEL001087	20.1764	2.56941	1.47303	1.7443	0.0811072	0.563264
AAEL002070	88.3986	-0.626666	0.359564	-1.74285	0.0813598	0.563264
AAEL010219	3.55409	4.39985	2.52326	1.74372	0.0812083	0.563264
AAEL011952	1123.53	0.191434	0.109904	1.74183	0.0815383	0.564171
AAEL009473	158.699	-0.52322	0.300479	-1.74129	0.0816336	0.564397
AAEL008354	2.99484	5.07404	2.91422	1.74113	0.0816607	0.564397
AAEL012930	4702.95	0.131844	0.0757967	1.73944	0.0819583	0.565236
AAEL004762	4.30983	-4.28709	2.46488	-1.73927	0.0819873	0.565236
AAEL008278	7969.58	0.210277	0.120844	1.74007	0.0818462	0.565236
AAEL028161	4793.74	0.133163	0.076579	1.7389	0.082053	0.565236
AAEL013971	10.5845	-3.85674	2.21791	-1.7389	0.0820519	0.565236
AAEL007464	94.8633	0.46809	0.269133	1.73925	0.0819913	0.565236
AAEL003342	24.4637	-0.954471	0.548974	-1.73865	0.0820968	0.565236
AAEL011907	368.885	-0.290059	0.166984	-1.73704	0.0823795	0.566748
AAEL004163	125.664	-0.490743	0.282541	-1.73689	0.0824065	0.566748
AAEL023548	17.4117	-2.46759	1.42152	-1.73588	0.082585	0.567147
AAEL006091	5908.07	0.12382	0.071344	1.73554	0.082645	0.567147
AAEL019890	475.965	-0.477619	0.275181	-1.73566	0.0826248	0.567147
AAEL009359	6.09999	-2.83343	1.63228	-1.73587	0.0825861	0.567147
AAEL007039	1300.67	0.559416	0.322425	1.73503	0.0827358	0.567191
AAEL013649	51.6159	-1.14741	0.66143	-1.73474	0.0827875	0.567191
AAEL011209	2650.72	0.161265	0.0929754	1.73449	0.082832	0.567191
AAEL012389	252.429	0.257977	0.148728	1.73455	0.0828199	0.567191
AAEL006171	3324.55	-0.277939	0.16028	-1.73408	0.082904	0.567375
AAEL001271	34.6498	-1.50621	0.86898	-1.73331	0.0830412	0.568005
AAEL020014	184.952	-0.425445	0.245533	-1.73274	0.0831421	0.568386
AAEL011199	345.36	-0.357525	0.206482	-1.73151	0.0833608	0.569362
AAEL011316	117.47	-0.696854	0.402473	-1.73143	0.0833754	0.569362
AAEL003756	183.091	0.419122	0.242205	1.73044	0.0835515	0.570255
AAEL005137	29.0648	-0.884943	0.511517	-1.73004	0.0836238	0.570438
AAEL021278	145.116	-0.829987	0.480067	-1.7289	0.0838271	0.571206
AAEL019864	2214.47	-0.19718	0.114039	-1.72906	0.0837978	0.571206
AAEL002602	263.369	0.325888	0.188529	1.72858	0.0838843	0.571286
AAEL010783	1592.44	-0.277181	0.160442	-1.72761	0.0840579	0.571979
AAEL004342	15.5313	-2.80254	1.6223	-1.7275	0.084077	0.571979
AAEL019872	16.1984	1.40925	0.816306	1.72637	0.0842801	0.57305
AAEL021717	3499.08	-0.286893	0.166231	-1.72586	0.0843718	0.573363
AAEL020265	3006.33	0.132553	0.0768654	1.72449	0.0846201	0.573885
AAEL008887	1124.09	-0.235732	0.136643	-1.72517	0.0844961	0.573885
AAEL019476	310.484	-0.398444	0.231093	-1.72417	0.0846768	0.573885
AAEL003844	13602.1	0.308561	0.178951	1.72427	0.0846587	0.573885
AAEL003951	1962.97	0.431301	0.250114	1.72442	0.0846325	0.573885
AAEL011397	15.7432	1.89868	1.1016	1.72357	0.0847856	0.57389
AAEL011662	538.802	-1.38779	0.80515	-1.72365	0.0847718	0.57389
AAEL002694	3678.9	0.12063	0.0699951	1.72341	0.0848145	0.57389
AAEL007581	25.0213	0.770956	0.44784	1.7215	0.0851604	0.575531
AAEL020849	335.458	-0.845052	0.490956	-1.72124	0.0852081	0.575531
AAEL025410	193.189	-0.674727	0.391906	-1.72166	0.0851317	0.575531
AAEL004369	26436.9	-0.369883	0.214916	-1.72106	0.0852401	0.575531
AAEL020542	446.299	-0.239364	0.139194	-1.71965	0.0854959	0.575712
AAEL022734	80.9056	-0.705369	0.409968	-1.72054	0.0853336	0.575712
AAEL003998	286.784	-0.307835	0.178974	-1.72	0.0854332	0.575712
AAEL005199	5.34097	-3.84812	2.23749	-1.71983	0.0854627	0.575712
AAEL028868	4.43732	1.37296	0.798256	1.71994	0.0854424	0.575712
AAEL007670	164.748	-0.524822	0.305307	-1.71899	0.0856155	0.576209
AAEL006062	403.145	-0.254182	0.147898	-1.71863	0.0856816	0.576345
AAEL017684	4.28726	-2.54507	1.48137	-1.71805	0.0857878	0.576751
AAEL010960	1369.12	0.173381	0.100985	1.7169	0.0859977	0.577307
AAEL000682	3847.75	0.222169	0.129416	1.7167	0.0860345	0.577307
AAEL000394	1128.07	0.223789	0.130357	1.71675	0.0860254	0.577307
AAEL022450	3.19568	1.55358	0.905039	1.71659	0.0860542	0.577307
AAEL005681	11.4609	1.81388	1.05781	1.71475	0.0863908	0.578023
AAEL006259	215.762	-1.74618	1.01814	-1.71507	0.0863318	0.578023
AAEL025458	10.0659	-1.56077	0.909902	-1.71532	0.0862872	0.578023
AAEL012164	3.45461	4.99843	2.91477	1.71486	0.0863702	0.578023
AAEL001372	3065.32	-0.242183	0.141189	-1.71531	0.0862884	0.578023
AAEL026555	1607.13	0.497606	0.290324	1.71397	0.0865351	0.57868
AAEL005256	195.809	-0.824661	0.481416	-1.71299	0.0867144	0.579263
AAEL023172	31.7237	-1.17375	0.68513	-1.71318	0.0866792	0.579263
AAEL020608	27.4541	-0.80416	0.46971	-1.71204	0.0868898	0.580127
AAEL022803	2211.2	-0.105608	0.0617157	-1.71121	0.0870429	0.580828
AAEL003817	564.968	0.319935	0.186991	1.71097	0.0870873	0.580828
AAEL014376	90.9208	-0.600081	0.350852	-1.71035	0.0872003	0.581274
AAEL011746	9787.19	0.144393	0.0844685	1.70943	0.0873714	0.581325
AAEL002550	2258.25	-0.338912	0.198274	-1.70931	0.087393	0.581325
AAEL003658	1268.83	-0.21357	0.124909	-1.7098	0.0873019	0.581325
AAEL004300	2300.79	0.131124	0.0766964	1.70965	0.0873303	0.581325
AAEL000720	221.53	0.261666	0.153116	1.70895	0.0874611	0.58147
AAEL011972	6740.78	0.134452	0.078783	1.70661	0.0878955	0.581474
AAEL002838	82.6044	-0.44916	0.262889	-1.70855	0.0875338	0.581474
AAEL010864	576.226	0.239842	0.140542	1.70654	0.0879068	0.581474
AAEL002423	85.0403	-0.598833	0.350764	-1.70722	0.0877805	0.581474
AAEL002880	5.94273	-2.46589	1.44464	-1.70692	0.087836	0.581474
AAEL023921	3.06265	4.47845	2.62438	1.70648	0.0879187	0.581474
AAEL005392	81.2971	-0.502829	0.294336	-1.70835	0.0875715	0.581474
AAEL008451	26.8965	-1.16751	0.684108	-1.70662	0.0878925	0.581474
AAEL005831	581.307	0.303725	0.177986	1.70645	0.0879241	0.581474
AAEL019847	61.8106	2.10179	1.23134	1.70691	0.0878387	0.581474
AAEL019671	1739	0.282643	0.165706	1.70569	0.0880656	0.582103
AAEL008878	6270.86	0.39561	0.232063	1.70475	0.0882402	0.582951
AAEL003084	2444.66	0.205553	0.120646	1.70377	0.0884247	0.583863
AAEL022375	138.019	-0.41317	0.242574	-1.70328	0.0885165	0.584162
AAEL023576	863.865	0.246948	0.145146	1.70137	0.0888727	0.585284
AAEL027000	568.868	0.313428	0.18417	1.70184	0.0887851	0.585284
AAEL024232	1.85901	-3.80323	2.23527	-1.70146	0.088856	0.585284
AAEL011787	4.46325	-3.93259	2.31056	-1.70201	0.0887537	0.585284
AAEL007880	64277.4	0.449241	0.264102	1.70101	0.0889406	0.585425
AAEL012628	208.843	-0.321407	0.188986	-1.70069	0.0890016	0.58552
AAEL021547	32.4267	0.727829	0.428122	1.70005	0.0891217	0.586003
AAEL012252	370.008	0.45581	0.268191	1.69957	0.0892113	0.586285
AAEL026612	20.964	1.30271	0.766906	1.69865	0.0893844	0.587116
AAEL007597	99.198	-0.745722	0.439435	-1.697	0.0896967	0.588695
AAEL004367	17.1907	-1.56599	0.922859	-1.69688	0.0897184	0.588695
AAEL007842	550.637	-0.289828	0.170949	-1.69541	0.0899985	0.590225
AAEL026069	6969.59	-0.282927	0.166982	-1.69436	0.0901974	0.590913
AAEL023392	29.4838	1.1428	0.674378	1.6946	0.0901517	0.590913
AAEL004718	42.0592	-0.818214	0.48324	-1.69318	0.0904207	0.592067
AAEL020922	64.7195	-0.925124	0.546989	-1.6913	0.0907791	0.594105
AAEL014254	252.544	-0.32661	0.193191	-1.6906	0.0909127	0.594669
AAEL014130	2205.3	0.15393	0.0910797	1.69006	0.0910163	0.594728
AAEL001295	387.241	-0.489252	0.289486	-1.69007	0.0910145	0.594728
AAEL008828	8871.93	0.208921	0.123672	1.68931	0.0911597	0.595246
AAEL002449	2.75505	-5.83632	3.45518	-1.68915	0.0911902	0.595246
AAEL003104	1025.63	-0.316862	0.18762	-1.68884	0.0912493	0.595259
AAEL001091	2977.54	0.349025	0.206689	1.68865	0.0912869	0.595259
AAEL022784	38.6781	0.661371	0.392025	1.68706	0.0915914	0.596008
AAEL007373	3.22738	-5.13203	3.04181	-1.68716	0.0915724	0.596008
AAEL028004	838.931	0.223116	0.132246	1.68713	0.0915788	0.596008
AAEL014203	68.5612	-0.597776	0.354293	-1.68724	0.0915579	0.596008
AAEL003483	87.5435	-0.756185	0.448598	-1.68566	0.0918608	0.597065
AAEL002739	305.134	-0.360857	0.214097	-1.68548	0.0918963	0.597065
AAEL008700	865.057	0.205412	0.121858	1.68567	0.0918597	0.597065
AAEL006655	628.369	-0.38524	0.228605	-1.68518	0.0919533	0.597094
AAEL002235	2842.13	0.281749	0.167214	1.68496	0.0919958	0.597094
AAEL023629	2491.8	0.174503	0.103608	1.68426	0.0921316	0.597667
AAEL010224	4548.84	-0.172175	0.102259	-1.68372	0.0922354	0.598032
AAEL003461	948.336	-0.174652	0.103821	-1.68225	0.0925202	0.599569
AAEL010842	343.92	-0.255522	0.152023	-1.68081	0.0927999	0.600453
AAEL004689	969.979	0.202464	0.120434	1.68112	0.0927398	0.600453
AAEL009853	394.82	0.451279	0.268482	1.68085	0.0927913	0.600453
AAEL025961	9463.3	0.47347	0.28174	1.68052	0.092856	0.600507
AAEL006434	37.241	-1.00707	0.60025	-1.67776	0.0933949	0.601523
AAEL025903	26.6801	0.9749	0.580818	1.67849	0.0932507	0.601523
AAEL009614	2039.73	0.169474	0.101037	1.67735	0.0934735	0.601523
AAEL000442	30.0084	-4.29665	2.56124	-1.67756	0.0934323	0.601523
AAEL001084	10.6526	-1.93077	1.15083	-1.67771	0.093403	0.601523
AAEL012523	669.933	-0.244495	0.145699	-1.67808	0.0933309	0.601523
AAEL019520	2.59676	-4.73425	2.81981	-1.67892	0.0931669	0.601523
AAEL028129	284.092	0.310351	0.184983	1.67772	0.0934012	0.601523
AAEL027348	8.7704	-1.36269	0.811876	-1.67845	0.0932594	0.601523
AAEL026692	168.701	0.264108	0.157464	1.67726	0.0934915	0.601523
AAEL025212	33.984	-1.09832	0.655354	-1.67593	0.0937528	0.602895
AAEL014844	336.431	0.363027	0.216721	1.67509	0.0939171	0.603643
AAEL023468	144.054	0.492462	0.294084	1.67456	0.0940208	0.604001
AAEL002416	5698.19	0.277251	0.16572	1.673	0.0943265	0.605655
AAEL008749	244.7	-0.53319	0.318948	-1.67171	0.0945806	0.606977
AAEL001316	3.64081	-4.41929	2.64423	-1.67129	0.0946635	0.607095
AAEL007566	450.121	0.269388	0.161241	1.67072	0.0947774	0.607095
AAEL008773	156.969	-0.625675	0.374894	-1.66894	0.0951296	0.607095
AAEL013310	197.577	-0.331793	0.19875	-1.6694	0.0950382	0.607095
AAEL026294	134.015	-0.424637	0.254384	-1.66928	0.0950625	0.607095
AAEL020170	456.263	0.220162	0.131836	1.66996	0.0949263	0.607095
AAEL005401	207402	0.264771	0.158638	1.66902	0.0951135	0.607095
AAEL025887	137.923	-0.307578	0.184119	-1.67054	0.0948129	0.607095
AAEL004015	3.10105	3.8006	2.27439	1.67104	0.0947132	0.607095
AAEL001099	2026.76	0.204928	0.12279	1.66893	0.0951303	0.607095
AAEL004694	260.352	-0.537207	0.321755	-1.66961	0.0949956	0.607095
AAEL004879	704.216	-0.226419	0.135705	-1.66846	0.0952236	0.607383
AAEL009957	599.6	0.279566	0.167679	1.66727	0.0954598	0.6077
AAEL007009	974.849	-0.198487	0.119011	-1.6678	0.0953561	0.6077
AAEL024161	33.5061	-2.37869	1.42672	-1.66724	0.0954667	0.6077
AAEL026920	704.628	0.253089	0.151774	1.66754	0.095408	0.6077
AAEL011929	8033.54	1.02524	0.615276	1.66631	0.0956526	0.60803
AAEL000562	1066.24	0.21727	0.130356	1.66673	0.0955672	0.60803
AAEL006937	1050.81	0.153204	0.091959	1.66601	0.095712	0.60803
AAEL025336	125.654	-0.420264	0.252245	-1.6661	0.0956944	0.60803
AAEL024313	23.2395	-1.07296	0.64427	-1.66538	0.0958362	0.608205
AAEL023585	1296.85	0.251556	0.151046	1.66543	0.0958278	0.608205
AAEL013565	313.882	0.316368	0.190007	1.66504	0.0959055	0.608337
AAEL006051	48.7471	-0.595456	0.357737	-1.66451	0.0960107	0.608697
AAEL007744	33.637	-1.1108	0.667855	-1.66324	0.0962651	0.610002
AAEL012413	1166.85	0.185596	0.111605	1.66298	0.0963168	0.610023
AAEL025051	2744.45	0.180445	0.108673	1.66043	0.0968271	0.612946
AAEL008687	4044.39	-0.223712	0.134856	-1.65889	0.0971386	0.61334
AAEL001340	4.46224	-2.93992	1.77235	-1.65877	0.0971622	0.61334
AAEL010434	6202.85	1.91709	1.15528	1.65942	0.0970306	0.61334
AAEL012387	702.026	0.258221	0.155662	1.65886	0.0971438	0.61334
AAEL019580	2209.05	0.299518	0.180451	1.65982	0.0969498	0.61334
AAEL025401	224.576	0.314238	0.189451	1.65867	0.0971821	0.61334
AAEL007765	41106.4	0.444515	0.268081	1.65814	0.0972901	0.613542
AAEL000102	5182.58	0.229884	0.138649	1.65803	0.0973117	0.613542
AAEL000049	3829.58	0.228461	0.137857	1.65723	0.0974735	0.614254
AAEL006762	461.197	-0.303638	0.183303	-1.65648	0.0976239	0.614894
AAEL022805	158.671	-0.376626	0.227622	-1.65461	0.0980037	0.615535
AAEL014246	428.481	-0.68608	0.414667	-1.65453	0.0980195	0.615535
AAEL026957	2.15095	3.83205	2.31607	1.65454	0.0980168	0.615535
[truncated: 17,764 more rows]

## Sheet: Mg4v0
geneID	baseMean	log2FoldChange	lfcSE	stat	pvalue	padj
AAEL006113	17282.2	3.78889	0.135592	27.9433	7.94847e-172	1.0248e-167
AAEL026215	70492.5	3.84877	0.15209	25.3059	2.75151e-141	1.77376e-137
AAEL010369	256.188	43.5958	1.77499	24.5612	3.28365e-133	1.4112e-129
AAEL012827	43676.6	4.43192	0.182319	24.3086	1.58879e-130	5.12108e-127
AAEL017462	8277.61	2.66633	0.110294	24.1747	4.10907e-129	1.05956e-125
AAEL005411	9354.56	2.36488	0.0979638	24.1403	9.43567e-129	2.02757e-125
AAEL012621	13213.6	1.71133	0.0730095	23.4398	1.68123e-121	3.09659e-118
AAEL000807	11356.8	2.76293	0.118338	23.3479	1.44879e-120	2.3349e-117
AAEL024267	52041.4	5.00102	0.21833	22.9057	4.07191e-116	5.83324e-113
AAEL005481	14242.4	-2.91793	0.130038	-22.439	1.63752e-111	2.11126e-108
AAEL013005	8735.3	3.07876	0.138756	22.1884	4.44825e-109	5.21376e-106
AAEL025915	10736.3	-3.61191	0.165587	-21.8128	1.75279e-105	1.88323e-102
AAEL001887	209317	5.94098	0.274964	21.6064	1.56368e-103	1.5508e-100
AAEL004407	1570.96	-4.85199	0.226663	-21.4062	1.17089e-101	1.07831e-98
AAEL026602	13291.4	5.17479	0.243796	21.2259	5.50419e-100	4.73103e-97
AAEL024283	2562.63	-3.82762	0.182804	-20.9384	2.39549e-97	1.93032e-94
AAEL013884	13220.1	5.67623	0.271444	20.9113	4.22783e-97	3.20643e-94
AAEL019957	4082.51	3.90592	0.187203	20.8646	1.12275e-96	8.04201e-94
AAEL010300	7040.05	2.16295	0.104115	20.7746	7.35275e-96	4.98942e-93
AAEL009946	10270.2	1.77423	0.0854713	20.7582	1.03321e-95	6.66058e-93
AAEL008096	13523.5	4.72003	0.229266	20.5876	3.54498e-94	2.17645e-91
AAEL007011	8149.34	-3.56778	0.174407	-20.4567	5.2402e-93	3.071e-90
AAEL026564	2808.02	-3.20314	0.158119	-20.2578	3.03401e-91	1.70076e-88
AAEL019582	4206.06	3.07895	0.152867	20.1415	3.19833e-90	1.71817e-87
AAEL002950	3425.14	-3.61567	0.179965	-20.0909	8.8553e-90	4.56686e-87
AAEL000589	8735.52	2.13376	0.107032	19.9357	1.99626e-88	9.89914e-86
AAEL001693	245950	6.25699	0.316479	19.7706	5.33192e-87	2.54609e-84
AAEL010065	31490	2.74729	0.139015	19.7625	6.25794e-87	2.88156e-84
AAEL009330	49263.6	-4.30476	0.21998	-19.5689	2.84967e-85	1.26692e-82
AAEL024525	4537.27	2.13799	0.110631	19.3254	3.28192e-83	1.40708e-80
AAEL019408	53832.1	4.22954	0.218876	19.3239	3.38319e-83	1.40708e-80
AAEL018161	14706.7	-1.76089	0.091498	-19.2451	1.55135e-82	6.25049e-80
AAEL018323	13987.9	2.30052	0.119785	19.2054	3.33798e-82	1.30414e-79
AAEL017263	23363.2	1.99173	0.10492	18.9832	2.34678e-80	8.89913e-78
AAEL011728	3755.51	2.12568	0.112202	18.9451	4.84412e-80	1.78444e-77
AAEL002235	2842.13	3.13513	0.16638	18.8432	3.34336e-79	1.19739e-76
AAEL003509	5130.57	1.54842	0.0822141	18.834	3.97217e-79	1.34772e-76
AAEL004335	37272.4	6.03115	0.320223	18.8342	3.96072e-79	1.34772e-76
AAEL001533	5014.22	6.53967	0.347492	18.8196	5.21718e-79	1.72475e-76
AAEL003742	26149.5	8.61472	0.458071	18.8065	6.6799e-79	2.1531e-76
AAEL000417	92625.3	2.99815	0.160159	18.7199	3.4075e-78	1.07153e-75
AAEL011598	2073.71	5.64609	0.303618	18.596	3.46049e-77	1.06229e-74
AAEL004913	5317.47	1.54329	0.083051	18.5824	4.45999e-77	1.33727e-74
AAEL012975	8369.15	-3.29783	0.177757	-18.5525	7.7903e-77	2.28274e-74
AAEL003541	2177.34	-3.10847	0.169013	-18.392	1.52385e-75	4.36601e-73
AAEL001588	42341.2	2.88048	0.156876	18.3615	2.67107e-75	7.48654e-73
AAEL013072	1860.85	3.31391	0.180573	18.3522	3.17003e-75	8.696e-73
AAEL009323	6153.15	-5.13167	0.280513	-18.2939	9.25669e-75	2.48638e-72
AAEL021782	4499.2	-2.70745	0.14912	-18.1562	1.14749e-73	3.01931e-71
AAEL011369	5434.08	-2.2912	0.126263	-18.1463	1.37404e-73	3.4831e-71
AAEL005822	10803.4	2.64841	0.145949	18.1461	1.37779e-73	3.4831e-71
AAEL004451	3104.39	4.84572	0.268006	18.0807	4.5259e-73	1.12216e-70
AAEL013541	2396.31	1.31972	0.0730235	18.0725	5.24768e-73	1.27657e-70
AAEL002560	60215.9	2.99837	0.166149	18.0463	8.43105e-73	2.01299e-70
AAEL010109	5609.72	4.83289	0.268625	17.9912	2.28234e-72	5.35022e-70
AAEL025245	913.674	-3.86496	0.215324	-17.9495	4.84142e-72	1.11465e-69
AAEL000020	2710.51	1.51418	0.0845311	17.9127	9.38125e-72	2.12197e-69
AAEL004870	2763.76	7.81505	0.437962	17.8441	3.20962e-71	7.13476e-69
AAEL009838	2258.76	-2.66922	0.149882	-17.8088	6.03937e-71	1.31976e-68
AAEL004756	1923.32	1.69708	0.0957818	17.7181	3.03794e-70	6.52802e-68
AAEL003318	154763	4.33939	0.245417	17.6817	5.79926e-70	1.22573e-67
AAEL011980	11294.7	2.70385	0.15368	17.5941	2.73495e-69	5.68736e-67
AAEL003452	1488.71	-2.41603	0.13829	-17.4707	2.39499e-68	4.90137e-66
AAEL006915	2690.93	2.4735	0.142376	17.373	1.32099e-67	2.66118e-65
AAEL006226	16010.2	3.88314	0.22484	17.2707	7.81977e-67	1.55108e-64
AAEL008370	12049.4	2.58044	0.149456	17.2655	8.54976e-67	1.67018e-64
AAEL004305	4944.74	3.19077	0.185019	17.2457	1.20645e-66	2.32161e-64
AAEL017349	56955.2	3.65462	0.212197	17.2227	1.79304e-66	3.39966e-64
AAEL004229	11234.6	5.39594	0.319371	16.8955	4.85252e-64	9.06718e-62
AAEL000802	3571.78	1.30156	0.0771991	16.8598	8.88975e-64	1.63736e-61
AAEL007229	2714.99	1.98622	0.118067	16.8228	1.66249e-63	3.01894e-61
AAEL010202	769662	7.89796	0.470845	16.774	3.78097e-63	6.77057e-61
AAEL007484	13678.1	1.86296	0.111507	16.7072	1.16189e-62	2.0521e-60
AAEL006879	22005.7	-1.77827	0.106451	-16.705	1.20439e-62	2.09841e-60
AAEL006525	4928.63	-2.29963	0.137849	-16.6822	1.7647e-62	3.03363e-60
AAEL018351	4514.57	-2.72058	0.163197	-16.6706	2.14557e-62	3.63984e-60
AAEL001707	2912.09	3.05139	0.183138	16.6617	2.48823e-62	4.16633e-60
AAEL022623	12728.5	4.26239	0.256071	16.6453	3.27206e-62	5.40854e-60
AAEL004440	4937.57	-2.77822	0.167165	-16.6196	5.02764e-62	8.20524e-60
AAEL008693	10764.5	3.80962	0.230539	16.5248	2.43116e-61	3.91812e-59
AAEL010844	2516.4	1.49011	0.0903742	16.4883	4.45616e-61	7.09299e-59
AAEL000080	42360	7.80816	0.473969	16.474	5.6419e-61	8.87086e-59
AAEL013207	2095.23	2.42582	0.148028	16.3875	2.34826e-60	3.64773e-58
AAEL027784	192.418	4.73462	0.291136	16.2626	1.81938e-59	2.79253e-57
AAEL001864	8040.88	-3.4042	0.209372	-16.2591	1.92457e-59	2.91924e-57
AAEL014754	2900.18	5.58499	0.344498	16.212	4.14932e-59	6.2206e-57
AAEL003505	11909.1	-2.16825	0.134196	-16.1573	1.00846e-58	1.49449e-56
AAEL014248	5350.78	3.08668	0.191444	16.1232	1.7538e-58	2.56952e-56
AAEL006095	19976.4	-1.95859	0.121626	-16.1033	2.41747e-58	3.50207e-56
AAEL006381	303294	6.78218	0.421392	16.0947	2.77831e-58	3.98008e-56
AAEL013845	13925.5	1.19027	0.0739867	16.0876	3.11879e-58	4.41874e-56
AAEL002701	3277.33	2.71213	0.169059	16.0425	6.4485e-58	9.03701e-56
AAEL007030	62403.6	4.52568	0.282537	16.018	9.56774e-58	1.32642e-55
AAEL002805	1490.88	1.76715	0.110651	15.9705	2.052e-57	2.81451e-55
AAEL011212	658.992	2.11963	0.133189	15.9144	5.03345e-57	6.83119e-55
AAEL010476	1521.33	2.09478	0.132006	15.8689	1.04096e-56	1.39803e-54
AAEL004977	11486.9	1.19456	0.0754506	15.8323	1.86215e-56	2.47512e-54
AAEL008461	23704.4	1.30851	0.0828031	15.8027	2.98288e-56	3.92431e-54
AAEL008181	4387.08	1.25722	0.0796134	15.7916	3.55562e-56	4.63057e-54
AAEL024337	1473.42	2.34879	0.148837	15.7809	4.20838e-56	5.42586e-54
AAEL014068	3173.65	1.81331	0.115565	15.6909	1.74698e-55	2.23007e-53
AAEL005315	6084.13	-1.97817	0.126526	-15.6345	4.24042e-55	5.35998e-53
AAEL019640	3166.4	-1.90581	0.122048	-15.6152	5.73244e-55	7.17557e-53
AAEL006373	1262.08	1.80617	0.116175	15.5469	1.66947e-54	2.06966e-52
AAEL004083	7142.88	3.71176	0.241202	15.3886	1.95149e-53	2.39624e-51
AAEL010905	4847.85	2.20027	0.143144	15.3711	2.55817e-53	3.11156e-51
AAEL024469	423.753	-2.31972	0.152054	-15.2559	1.50372e-52	1.81192e-50
AAEL008134	61854.3	2.34775	0.15408	15.2373	2.00091e-52	2.38868e-50
AAEL001005	139499	2.32827	0.153019	15.2155	2.79096e-52	3.30127e-50
AAEL011158	7206.92	3.24587	0.213638	15.1933	3.91467e-52	4.54701e-50
AAEL001812	3818.11	-3.65882	0.240811	-15.1937	3.89081e-52	4.54701e-50
AAEL019909	1718.98	-2.72775	0.179625	-15.1858	4.39176e-52	5.05562e-50
AAEL006619	2003.19	3.22252	0.213142	15.1191	1.21102e-51	1.38174e-49
AAEL007812	21511.7	5.02345	0.33231	15.1168	1.25532e-51	1.41973e-49
AAEL015603	1781.82	-2.59476	0.172059	-15.0806	2.17361e-51	2.4369e-49
AAEL021846	1600.1	4.11078	0.273056	15.0547	3.21456e-51	3.57288e-49
AAEL010435	109037	8.78266	0.583752	15.0452	3.7131e-51	4.0917e-49
AAEL010650	20150.4	4.0374	0.268981	15.01	6.31551e-51	6.9005e-49
AAEL001656	96717.6	4.96155	0.331301	14.976	1.05448e-50	1.14247e-48
AAEL013127	192844	8.44943	0.564628	14.9646	1.25108e-50	1.34418e-48
AAEL013065	1279.42	2.78209	0.186377	14.9272	2.19294e-50	2.33666e-48
AAEL027249	12360.1	1.11194	0.0746793	14.8896	3.85141e-50	4.07019e-48
AAEL002061	10023	1.27483	0.0857186	14.8722	4.9908e-50	5.23141e-48
AAEL023958	8171.28	6.80166	0.457732	14.8595	6.03898e-50	6.27907e-48
AAEL012940	2688.02	-2.29958	0.154875	-14.848	7.16996e-50	7.39538e-48
AAEL001839	6653.99	5.99443	0.404334	14.8254	1.00324e-49	1.02657e-47
AAEL025078	6559.31	1.7928	0.121388	14.7691	2.31808e-49	2.35331e-47
AAEL008679	2984.26	-2.29522	0.155723	-14.7391	3.61565e-49	3.64192e-47
AAEL011319	3507.75	-4.13119	0.280709	-14.717	5.01757e-49	5.01485e-47
AAEL022948	1504.05	2.72609	0.186517	14.6158	2.22861e-48	2.21026e-46
AAEL004489	1211.46	-1.87858	0.128819	-14.5831	3.59952e-48	3.54264e-46
AAEL021581	1500.27	-2.01298	0.138096	-14.5767	3.95245e-48	3.86053e-46
AAEL025961	9463.3	4.09198	0.281368	14.5432	6.45277e-48	6.2553e-46
AAEL014734	102018	2.92986	0.201628	14.531	7.70745e-48	7.41583e-46
AAEL013118	491501	7.97701	0.549282	14.5226	8.71274e-48	8.32099e-46
AAEL004743	9293.87	2.62862	0.181619	14.4732	1.78855e-47	1.69557e-45
AAEL013712	596314	5.03631	0.348615	14.4466	2.6323e-47	2.47724e-45
AAEL009957	599.6	2.3608	0.164487	14.3525	1.02785e-46	9.60299e-45
AAEL017445	2377.17	-2.77669	0.19355	-14.3461	1.12712e-46	1.04546e-44
AAEL008879	69312.7	3.13593	0.218963	14.3217	1.60112e-46	1.47452e-44
AAEL008613	2355.81	1.20265	0.0840403	14.3104	1.8834e-46	1.72217e-44
AAEL000709	19749.2	2.94715	0.206233	14.2904	2.51214e-46	2.28091e-44
AAEL013611	77249	4.52776	0.316902	14.2876	2.61564e-46	2.35829e-44
AAEL012131	44916.5	2.5732	0.180526	14.2539	4.2423e-46	3.79833e-44
AAEL010078	1272.62	-1.68405	0.118262	-14.2401	5.16649e-46	4.5939e-44
AAEL025199	2888.49	-2.46107	0.173038	-14.2227	6.6268e-46	5.85201e-44
AAEL004425	1758.26	2.45974	0.172966	14.2209	6.79248e-46	5.95752e-44
AAEL015651	1819.78	2.258	0.158989	14.2022	8.87818e-46	7.73422e-44
AAEL012702	96994.8	2.43294	0.171425	14.1925	1.01952e-45	8.77778e-44
AAEL015136	19377.3	5.44441	0.383615	14.1924	1.02123e-45	8.77778e-44
AAEL008793	4934.94	-1.98642	0.140088	-14.1798	1.22229e-45	1.04365e-43
AAEL001100	87007.7	6.85885	0.483886	14.1745	1.31729e-45	1.11736e-43
AAEL003433	14737.1	1.82488	0.128988	14.1477	1.93065e-45	1.62692e-43
AAEL019746	9115.97	2.02209	0.14297	14.1435	2.04894e-45	1.71539e-43
AAEL002102	4754.45	2.56705	0.181746	14.1244	2.6885e-45	2.23631e-43
AAEL002866	4454.53	-1.08531	0.0770415	-14.0874	4.54068e-45	3.75276e-43
AAEL008958	8352.05	-1.44923	0.102882	-14.0863	4.61261e-45	3.78792e-43
AAEL018326	18030.4	3.26204	0.231884	14.0675	6.01368e-45	4.90724e-43
AAEL013470	1174.59	1.32145	0.0941072	14.042	8.62819e-45	6.99643e-43
AAEL011251	1105.88	1.59521	0.113792	14.0187	1.19792e-44	9.65297e-43
AAEL013230	7109.56	1.2181	0.0872372	13.9631	2.61955e-44	2.09775e-42
AAEL003508	58246.2	2.59013	0.18572	13.9464	3.30871e-44	2.63328e-42
AAEL009166	183658	8.86056	0.636084	13.9298	4.17269e-44	3.30052e-42
AAEL019720	1138.08	-2.92178	0.20993	-13.9179	4.93097e-44	3.85303e-42
AAEL005821	63670.7	2.63624	0.189409	13.9182	4.90909e-44	3.85303e-42
AAEL010348	5981.98	-1.70964	0.122865	-13.9148	5.14717e-44	3.99774e-42
AAEL000541	6536.75	-2.13975	0.153854	-13.9076	5.69337e-44	4.39549e-42
AAEL007114	6654.46	5.23557	0.376666	13.8998	6.35395e-44	4.87628e-42
AAEL013083	4630.74	-2.10343	0.15175	-13.8612	1.08853e-43	8.30439e-42
AAEL022091	5155.72	0.966723	0.0699335	13.8235	1.84008e-43	1.39554e-41
AAEL002387	1404.03	1.4611	0.105858	13.8025	2.46309e-43	1.85711e-41
AAEL009531	28780.1	3.07873	0.223395	13.7815	3.29164e-43	2.46739e-41
AAEL023742	917.829	4.89063	0.354946	13.7785	3.43293e-43	2.55842e-41
AAEL022092	767.841	2.34259	0.170041	13.7766	3.52639e-43	2.61297e-41
AAEL012578	46122	3.22195	0.234043	13.7665	4.05591e-43	2.98817e-41
AAEL023271	1714.81	-2.43676	0.177042	-13.7638	4.20832e-43	3.08283e-41
AAEL009510	39602.2	2.01574	0.146503	13.759	4.49648e-43	3.27532e-41
AAEL005977	7123.04	3.35049	0.24396	13.7338	6.37391e-43	4.61679e-41
AAEL009859	26295.2	-1.75408	0.127816	-13.7235	7.34645e-43	5.2915e-41
AAEL023219	11370.7	-2.57688	0.187847	-13.718	7.92238e-43	5.67463e-41
AAEL009165	187126	7.0795	0.516386	13.7097	8.88114e-43	6.32622e-41
AAEL001432	34025.1	1.69734	0.124058	13.6818	1.30335e-42	9.23302e-41
AAEL024497	6348.83	2.23047	0.163059	13.6789	1.35763e-42	9.56496e-41
AAEL011395	5041.4	1.70767	0.12512	13.6483	2.06689e-42	1.44828e-40
AAEL000574	3596.67	1.10326	0.080929	13.6324	2.56852e-42	1.79005e-40
AAEL026452	958.983	1.93284	0.141993	13.6122	3.38876e-42	2.349e-40
AAEL012918	9470.86	1.21917	0.0896089	13.6055	3.71595e-42	2.55119e-40
AAEL006870	3688.68	2.91101	0.21396	13.6054	3.72003e-42	2.55119e-40
AAEL007298	17978.3	2.23239	0.16414	13.6005	3.97795e-42	2.71364e-40
AAEL018278	3823.72	0.998299	0.0734061	13.5997	4.02263e-42	2.72967e-40
AAEL002906	7356.4	1.38866	0.102298	13.5747	5.65824e-42	3.81946e-40
AAEL011756	55623.6	2.79502	0.206156	13.5578	7.12244e-42	4.78279e-40
AAEL010473	2261.62	1.78897	0.132069	13.5457	8.40117e-42	5.61224e-40
AAEL000428	29674.8	1.65058	0.122301	13.496	1.65006e-41	1.09661e-39
AAEL013098	12614.6	1.26966	0.0941903	13.4797	2.05898e-41	1.36135e-39
AAEL007286	6490.8	2.0345	0.151113	13.4635	2.56606e-41	1.68797e-39
AAEL012041	11255.9	3.23984	0.24086	13.4511	3.03271e-41	1.98481e-39
AAEL014014	1607.12	3.16275	0.235448	13.4329	3.87844e-41	2.52549e-39
AAEL027336	35437	2.74557	0.204436	13.43	4.035e-41	2.61424e-39
AAEL012440	40053.4	2.9011	0.216254	13.4153	4.92258e-41	3.17334e-39
AAEL019550	6714.31	-2.95943	0.220768	-13.4052	5.63902e-41	3.61711e-39
AAEL002859	15340.5	-2.0538	0.153227	-13.4036	5.75708e-41	3.67456e-39
AAEL012099	19502.7	-1.61131	0.120441	-13.3784	8.0888e-41	5.13738e-39
AAEL011905	96692.3	-1.57288	0.117573	-13.3779	8.1382e-41	5.14342e-39
AAEL023077	3623.52	1.34005	0.100454	13.3399	1.35729e-40	8.53635e-39
AAEL008849	10931.2	1.71	0.128229	13.3355	1.4394e-40	9.00884e-39
AAEL004479	1541.76	3.28434	0.246421	13.3282	1.58724e-40	9.88613e-39
AAEL027091	1559.79	3.82187	0.287059	13.3139	1.92255e-40	1.19171e-38
AAEL006790	1889.89	2.6729	0.200861	13.3072	2.10195e-40	1.29667e-38
AAEL012084	1754.31	1.21144	0.0912478	13.2764	3.17308e-40	1.94812e-38
AAEL022632	13466.8	-1.77204	0.133564	-13.2673	3.58061e-40	2.18791e-38
AAEL025830	1424.13	1.36027	0.102837	13.2275	6.08917e-40	3.70319e-38
AAEL005832	13316.7	-1.7893	0.13569	-13.1866	1.04755e-39	6.34087e-38
AAEL004692	639.766	-5.16388	0.391617	-13.1861	1.05564e-39	6.35996e-38
AAEL025607	3111.34	-2.78853	0.212776	-13.1055	3.06408e-39	1.83745e-37
AAEL015110	158051	2.4871	0.189795	13.1041	3.11802e-39	1.86114e-37
AAEL009039	1015.08	1.12852	0.0862811	13.0796	4.30881e-39	2.56007e-37
AAEL002083	53968.9	-0.94832	0.0725134	-13.0778	4.40741e-39	2.60664e-37
AAEL019552	3764.93	2.17982	0.166695	13.0767	4.47683e-39	2.63561e-37
AAEL009148	4090.55	-1.65021	0.126278	-13.0681	5.01308e-39	2.9379e-37
AAEL027580	29301.1	1.55146	0.11873	13.0671	5.07955e-39	2.96338e-37
AAEL005972	405.563	2.71818	0.208108	13.0614	5.47041e-39	3.17703e-37
AAEL007090	8546.37	4.73436	0.362728	13.0521	6.1824e-39	3.57443e-37
AAEL009317	22559.2	1.1765	0.0901963	13.0438	6.89133e-39	3.96651e-37
AAEL007758	10554.4	-3.70868	0.284622	-13.0302	8.24384e-39	4.7239e-37
AAEL005739	11710.2	-1.94658	0.149503	-13.0204	9.37214e-39	5.34668e-37
AAEL019534	557.058	-2.40858	0.185443	-12.9883	1.42606e-38	8.09962e-37
AAEL007767	2185.71	-1.05254	0.0812074	-12.9611	2.03268e-38	1.14945e-36
AAEL027240	1450.59	-2.63483	0.20364	-12.9387	2.72292e-38	1.53304e-36
AAEL010366	6249.3	-3.28887	0.254261	-12.935	2.85572e-38	1.60081e-36
AAEL024438	638.315	4.29806	0.333378	12.8924	4.96474e-38	2.77102e-36
AAEL020311	1770.97	2.70129	0.20965	12.8848	5.48311e-38	3.04714e-36
AAEL019470	288247	8.1068	0.629886	12.8703	6.61701e-38	3.66151e-36
AAEL021113	7097.83	-0.976952	0.0759813	-12.8578	7.77536e-38	4.28409e-36
AAEL014768	18806.2	-2.86708	0.223166	-12.8473	8.90791e-38	4.88722e-36
AAEL007403	9229.65	1.48062	0.115265	12.8453	9.13438e-38	4.99024e-36
AAEL023188	13239.2	1.71494	0.13357	12.8393	9.88057e-38	5.37512e-36
AAEL026497	2618.94	1.19008	0.0930403	12.791	1.8401e-37	9.96826e-36
AAEL017030	15415.7	-1.20129	0.0940925	-12.7671	2.50261e-37	1.35005e-35
AAEL012875	5898.97	1.04975	0.0822441	12.7638	2.61206e-37	1.40322e-35
AAEL006181	8012.1	4.03747	0.316491	12.757	2.84942e-37	1.52438e-35
AAEL000269	14410.8	-1.40603	0.110345	-12.7421	3.44959e-37	1.83784e-35
AAEL011567	4312.96	1.21109	0.0950966	12.7353	3.76219e-37	1.99613e-35
AAEL021977	1656.36	1.11357	0.0875403	12.7207	4.54047e-37	2.39919e-35
AAEL012105	1268.52	1.1901	0.0936025	12.7144	4.92022e-37	2.58924e-35
AAEL009756	792.355	-2.54227	0.200128	-12.7032	5.67273e-37	2.97311e-35
AAEL008177	731.438	-1.34479	0.106015	-12.6849	7.16966e-37	3.74245e-35
AAEL024516	4669.62	1.86466	0.147101	12.676	8.02799e-37	4.17359e-35
AAEL002703	2799.31	1.29335	0.102154	12.6608	9.75073e-37	5.04884e-35
AAEL008656	5806.38	1.74942	0.138397	12.6406	1.26163e-36	6.50649e-35
AAEL008028	16595.7	2.52434	0.200218	12.6079	1.90948e-36	9.80835e-35
AAEL024692	765.543	2.36515	0.18777	12.596	2.22137e-36	1.13651e-34
AAEL020615	1509.37	-2.39468	0.190338	-12.5812	2.67897e-36	1.36522e-34
AAEL025437	3578.88	1.8812	0.149539	12.58	2.7205e-36	1.38092e-34
AAEL011136	4093.35	1.09411	0.0869994	12.576	2.85996e-36	1.44602e-34
AAEL007501	5594.22	0.975366	0.0776163	12.5665	3.22656e-36	1.625e-34
AAEL000795	17144.4	-1.55719	0.124309	-12.5268	5.32487e-36	2.67134e-34
AAEL011813	4314.15	1.15033	0.0918498	12.524	5.51487e-36	2.75594e-34
AAEL011578	3784.96	1.95727	0.15634	12.5193	5.85515e-36	2.91469e-34
AAEL001434	4848.11	-2.10386	0.168411	-12.4924	8.2117e-36	4.07206e-34
AAEL021836	2047.66	-1.99455	0.159689	-12.4902	8.44443e-36	4.17142e-34
AAEL006707	1917.02	-2.07821	0.166645	-12.4709	1.07604e-35	5.29518e-34
AAEL000314	4522.62	-2.16891	0.17432	-12.4421	1.54371e-35	7.56771e-34
AAEL003192	6782.35	2.6868	0.216053	12.4358	1.66969e-35	8.15427e-34
AAEL022013	727.944	-1.51174	0.121891	-12.4024	2.53609e-35	1.23388e-33
AAEL011952	1123.53	1.34687	0.108858	12.3727	3.67095e-35	1.77931e-33
AAEL025109	1975.37	4.91316	0.397374	12.3641	4.0893e-35	1.97466e-33
AAEL011901	5552.23	2.51054	0.203539	12.3344	5.91168e-35	2.844e-33
AAEL005185	4305	-1.48202	0.120189	-12.3307	6.1902e-35	2.96692e-33
AAEL008564	6068.43	-1.32598	0.10781	-12.2993	9.14092e-35	4.36496e-33
AAEL012743	972.004	-2.90677	0.23638	-12.297	9.39991e-35	4.47207e-33
AAEL003785	10303.7	0.948459	0.0771314	12.2967	9.43984e-35	4.47455e-33
AAEL025650	4049.2	-1.99122	0.162155	-12.2797	1.16426e-34	5.49844e-33
AAEL007874	8518.54	-1.59656	0.130039	-12.2776	1.19527e-34	5.6243e-33
AAEL004607	1687.17	-1.51874	0.123742	-12.2735	1.25695e-34	5.89303e-33
AAEL001916	12070.1	1.0437	0.0850456	12.2722	1.27672e-34	5.96402e-33
AAEL012783	345879	2.36809	0.193085	12.2645	1.40461e-34	6.53777e-33
AAEL026981	116908	8.67077	0.707457	12.2562	1.55544e-34	7.21376e-33
AAEL000088	2087.76	1.03444	0.0844486	12.2493	1.69463e-34	7.83113e-33
AAEL007078	24704.5	0.946156	0.0773519	12.2318	2.10142e-34	9.67627e-33
AAEL006309	2681.25	0.931695	0.0762549	12.2182	2.48648e-34	1.14086e-32
AAEL010799	7771.4	-1.30759	0.107439	-12.1704	4.46634e-34	2.042e-32
AAEL001935	1670.21	-1.17774	0.0969092	-12.1531	5.52498e-34	2.51709e-32
AAEL014640	18041.8	1.00884	0.0831664	12.1304	7.29277e-34	3.31076e-32
AAEL023166	890.493	2.5449	0.209879	12.1256	7.73376e-34	3.49865e-32
AAEL006315	7543.73	1.07174	0.0884049	12.1231	7.96556e-34	3.59091e-32
AAEL005271	4393.1	1.3672	0.112832	12.1172	8.56697e-34	3.84857e-32
AAEL015137	208.185	6.2805	0.519005	12.101	1.04275e-33	4.6681e-32
AAEL008591	2216.98	-1.79422	0.148293	-12.0992	1.06659e-33	4.75834e-32
AAEL023746	1555.87	2.91985	0.241778	12.0766	1.4047e-33	6.2451e-32
AAEL008509	724.699	2.13103	0.17651	12.0731	1.4647e-33	6.48949e-32
AAEL004074	4413.11	-1.47874	0.122514	-12.0699	1.52333e-33	6.72611e-32
AAEL014797	19678.3	2.13457	0.17704	12.057	1.78164e-33	7.83982e-32
AAEL001493	979.325	2.40241	0.19971	12.0295	2.48741e-33	1.09082e-31
AAEL000703	4000.43	-1.91127	0.158978	-12.0222	2.71565e-33	1.18688e-31
AAEL007062	1667.21	-1.51987	0.126461	-12.0185	2.84175e-33	1.23779e-31
AAEL012161	4793.7	1.41086	0.117411	12.0164	2.91414e-33	1.26175e-31
AAEL013071	14793.2	1.22961	0.102329	12.0163	2.91632e-33	1.26175e-31
AAEL014732	12480.5	1.18333	0.098622	11.9986	3.61277e-33	1.55784e-31
AAEL000797	5180.23	6.56504	0.547211	11.9973	3.6722e-33	1.57819e-31
AAEL007432	906924	7.97281	0.664898	11.991	3.95987e-33	1.69617e-31
AAEL024500	4363.89	1.17828	0.0982679	11.9905	3.98353e-33	1.70065e-31
AAEL001497	2056.03	1.14776	0.0957702	11.9845	4.28217e-33	1.82211e-31
AAEL010787	101148	-2.51982	0.210584	-11.9659	5.36269e-33	2.27438e-31
AAEL006883	1389.26	-2.762	0.231199	-11.9464	6.78048e-33	2.86625e-31
AAEL002913	14056.5	1.28202	0.107372	11.94	7.32522e-33	3.08641e-31
AAEL027429	833.595	2.24354	0.188056	11.9302	8.24019e-33	3.46061e-31
AAEL010485	4941.13	3.56163	0.298585	11.9284	8.42209e-33	3.52552e-31
AAEL009497	2022.26	2.60312	0.21843	11.9174	9.60218e-33	4.0065e-31
AAEL005290	2298.43	-1.71053	0.143595	-11.9122	1.02247e-32	4.25249e-31
AAEL004277	3117.05	3.50414	0.294405	11.9025	1.14891e-32	4.76299e-31
AAEL007136	5732	3.0421	0.255726	11.896	1.24209e-32	5.13276e-31
AAEL019652	2593.78	1.4846	0.124805	11.8954	1.25064e-32	5.15159e-31
AAEL012904	20892.5	0.643123	0.054155	11.8756	1.58519e-32	6.50887e-31
AAEL019416	759.133	-2.46411	0.207621	-11.8683	1.72928e-32	7.07796e-31
AAEL023223	9693.51	-1.79708	0.151442	-11.8665	1.76725e-32	7.21048e-31
AAEL006144	1089.63	1.92086	0.16205	11.8535	2.06288e-32	8.39013e-31
AAEL023347	11363.5	1.27991	0.108074	11.8429	2.34262e-32	9.49794e-31
AAEL000438	1028.14	2.58385	0.218266	11.8381	2.48052e-32	1.00255e-30
AAEL019589	3976.08	-1.15821	0.0978828	-11.8326	2.64657e-32	1.06632e-30
AAEL004043	9538.75	2.02234	0.171042	11.8237	2.94471e-32	1.18274e-30
AAEL008084	5876.23	-1.13495	0.0961928	-11.7987	3.9631e-32	1.58684e-30
AAEL019606	1436.86	-2.80092	0.237816	-11.7777	5.08762e-32	2.0308e-30
AAEL027637	7491.58	1.65609	0.140624	11.7767	5.14884e-32	2.04889e-30
AAEL000859	314241	3.82546	0.324874	11.7752	5.23861e-32	2.0782e-30
AAEL019932	2602.46	-1.75145	0.148916	-11.7613	6.17764e-32	2.4432e-30
AAEL012700	4066.4	2.7968	0.237962	11.7531	6.80472e-32	2.68298e-30
AAEL014177	3215.72	1.02436	0.0871863	11.7491	7.14123e-32	2.80707e-30
AAEL002182	1481.24	-1.59501	0.135786	-11.7465	7.35793e-32	2.88346e-30
AAEL012122	7490.44	0.943992	0.0805514	11.7191	1.01709e-31	3.97373e-30
AAEL001188	2087.49	1.02658	0.0876045	11.7183	1.02719e-31	4.00106e-30
AAEL004444	1184.66	-1.63403	0.139474	-11.7156	1.06005e-31	4.11665e-30
AAEL004509	1952.54	1.73921	0.148689	11.697	1.3209e-31	5.11423e-30
AAEL027982	2406.64	-3.0522	0.26135	-11.6786	1.63947e-31	6.32864e-30
AAEL007694	2001.38	-1.55044	0.132771	-11.6776	1.65953e-31	6.38697e-30
AAEL026025	176036	8.0972	0.693937	11.6685	1.84665e-31	7.08595e-30
AAEL021016	3891.81	-1.14479	0.0981871	-11.6592	2.05893e-31	7.8771e-30
AAEL008000	4710.16	0.946271	0.081204	11.653	2.21504e-31	8.44925e-30
AAEL005046	4379.33	1.16284	0.0997942	11.6524	2.23085e-31	8.48446e-30
AAEL007926	94146.7	2.48638	0.213549	11.6432	2.48629e-31	9.42815e-30
AAEL000834	1029.83	6.92309	0.594789	11.6396	2.59336e-31	9.80532e-30
AAEL014526	6946.4	2.77268	0.238693	11.6161	3.41519e-31	1.28749e-29
AAEL027783	2317.84	-2.08446	0.179567	-11.6083	3.74075e-31	1.40611e-29
AAEL001847	3080.74	-1.56589	0.135119	-11.589	4.68775e-31	1.75695e-29
AAEL001915	782.494	-3.02308	0.260901	-11.5871	4.79194e-31	1.7908e-29
AAEL014891	5477.87	-1.92826	0.16659	-11.5749	5.52476e-31	2.05869e-29
AAEL009762	3301.91	8.47029	0.732886	11.5574	6.76954e-31	2.51527e-29
AAEL009487	9928.8	-4.49051	0.389346	-11.5335	8.94723e-31	3.31485e-29
AAEL001710	1572.94	3.20906	0.278847	11.5083	1.19793e-30	4.42549e-29
AAEL004023	6916.51	1.81899	0.158337	11.4881	1.51407e-30	5.57187e-29
AAEL023706	1396.97	4.21729	0.367106	11.4879	1.51689e-30	5.57187e-29
AAEL003764	32734.2	1.58219	0.137897	11.4736	1.78969e-30	6.55524e-29
AAEL025134	15864.4	1.61452	0.140802	11.4667	1.94005e-30	7.08584e-29
AAEL022462	3200.33	-1.15523	0.10084	-11.456	2.19454e-30	7.99271e-29
AAEL021072	1680.33	1.85128	0.161631	11.4537	2.2521e-30	8.17923e-29
AAEL021812	3116	-2.0696	0.180911	-11.4399	2.64146e-30	9.56641e-29
AAEL001317	1667.48	0.956002	0.0836345	11.4307	2.93685e-30	1.06064e-28
AAEL009486	4866.31	-1.35909	0.11898	-11.4228	3.21722e-30	1.15865e-28
AAEL010387	916.393	1.15345	0.101009	11.4192	3.35194e-30	1.2038e-28
AAEL001855	374.31	4.20467	0.368625	11.4064	3.88699e-30	1.39208e-28
AAEL001102	4660.63	1.18062	0.103539	11.4027	4.05485e-30	1.44818e-28
AAEL013107	489.15	-2.06832	0.181465	-11.3979	4.28335e-30	1.52556e-28
AAEL015298	4989.56	1.87967	0.165149	11.3816	5.16194e-30	1.83341e-28
AAEL001896	11013.1	-0.996109	0.0876106	-11.3697	5.91723e-30	2.0959e-28
AAEL004984	4679.99	0.743496	0.0653976	11.3688	5.97708e-30	2.1113e-28
AAEL023750	877.003	-2.4983	0.220997	-11.3047	1.24352e-29	4.38053e-28
AAEL004148	9721.39	1.59423	0.141266	11.2853	1.55119e-29	5.44946e-28
AAEL005092	3580	1.47518	0.130793	11.2787	1.67167e-29	5.85675e-28
AAEL021307	7247.58	0.955539	0.0847885	11.2697	1.85254e-29	6.47285e-28
AAEL012351	14932.6	2.41508	0.214506	11.2588	2.09561e-29	7.30237e-28
AAEL002834	9286.98	-1.63551	0.145458	-11.2439	2.48228e-29	8.62642e-28
AAEL005861	10719.6	-2.06642	0.18379	-11.2434	2.49604e-29	8.65093e-28
AAEL005666	13618.5	1.62147	0.144289	11.2376	2.66473e-29	9.21083e-28
AAEL014325	5590.69	1.09907	0.0980457	11.2098	3.65189e-29	1.25893e-27
AAEL005918	4750.37	1.90829	0.170287	11.2064	3.79512e-29	1.30481e-27
AAEL013267	6445.19	-1.36307	0.121698	-11.2004	4.06019e-29	1.39224e-27
AAEL006372	26344.7	-2.47632	0.221248	-11.1925	4.43732e-29	1.51752e-27
AAEL027567	538.503	1.67892	0.15016	11.1809	5.05677e-29	1.72479e-27
AAEL026274	144.343	4.01172	0.35955	11.1576	6.57179e-29	2.23562e-27
AAEL008022	3678.97	3.31194	0.297288	11.1405	7.96454e-29	2.70228e-27
AAEL010569	2410.21	0.885351	0.0794864	11.1384	8.15708e-29	2.76035e-27
AAEL000092	5729.45	1.43203	0.128576	11.1377	8.22458e-29	2.7759e-27
AAEL006634	7542.04	2.44408	0.219612	11.1291	9.05424e-29	3.04795e-27
AAEL027222	53326.2	8.28898	0.745097	11.1247	9.5125e-29	3.19387e-27
AAEL012034	1981.06	1.05521	0.0948827	11.1212	9.89114e-29	3.31238e-27
AAEL003377	4369.07	1.30632	0.117545	11.1134	1.08028e-28	3.60829e-27
AAEL002999	1107.4	-1.36281	0.122787	-11.099	1.26907e-28	4.22795e-27
AAEL017244	7535.27	-1.95332	0.176153	-11.0888	1.42229e-28	4.7262e-27
AAEL018267	11296.4	2.06928	0.187034	11.0637	1.88214e-28	6.23815e-27
AAEL003084	2444.66	1.3281	0.120058	11.0621	1.915e-28	6.33079e-27
AAEL012610	7759.51	1.37129	0.124046	11.0546	2.08216e-28	6.86581e-27
AAEL007979	5738.16	3.65001	0.331123	11.0231	2.95577e-28	9.72162e-27
AAEL017022	240434	-1.03934	0.0942925	-11.0225	2.97799e-28	9.74497e-27
AAEL007051	343.807	10.1077	0.91699	11.0226	2.97193e-28	9.74497e-27
AAEL003646	21887.9	-1.32615	0.12034	-11.02	3.05902e-28	9.9848e-27
AAEL000641	106284	1.00985	0.0916663	11.0166	3.1797e-28	1.03525e-26
AAEL004319	6946.04	-1.85709	0.168682	-11.0094	3.44127e-28	1.11759e-26
AAEL011382	1567.35	1.49218	0.13554	11.0092	3.45173e-28	1.11817e-26
AAEL006314	2199.41	3.60857	0.328469	10.986	4.46093e-28	1.44147e-26
AAEL014863	1444.45	-1.94064	0.176725	-10.9811	4.71004e-28	1.51816e-26
AAEL000716	2626.3	-1.32444	0.120688	-10.9741	5.0928e-28	1.63744e-26
AAEL013636	777.708	-1.29529	0.118098	-10.9679	5.45348e-28	1.74905e-26
AAEL010151	1412.16	-1.95444	0.178309	-10.961	5.88527e-28	1.88285e-26
AAEL002089	1181.17	-1.29213	0.117935	-10.9563	6.19891e-28	1.97828e-26
AAEL008379	5906.68	0.93775	0.0857545	10.9353	7.81583e-28	2.48814e-26
AAEL001356	5683.5	0.849215	0.0777164	10.9271	8.55285e-28	2.71606e-26
AAEL006805	7549.1	-2.66477	0.243946	-10.9236	8.8887e-28	2.81577e-26
AAEL011554	5952.71	0.963769	0.0883114	10.9133	9.95692e-28	3.14644e-26
AAEL023829	497.219	2.28986	0.209855	10.9116	1.01426e-27	3.19728e-26
AAEL002324	1773.45	1.1348	0.104382	10.8716	1.57455e-27	4.95137e-26
AAEL010017	29229.2	1.48173	0.136386	10.8643	1.70559e-27	5.35042e-26
AAEL008569	1005.48	-2.36588	0.217898	-10.8578	1.83196e-27	5.73288e-26
AAEL002174	8219.86	1.62478	0.149869	10.8413	2.19247e-27	6.84444e-26
AAEL012750	4592.58	-1.57845	0.145659	-10.8367	2.30746e-27	7.18602e-26
AAEL009547	1837.84	-1.0137	0.0935846	-10.8319	2.42947e-27	7.54775e-26
AAEL019824	3192.93	1.16242	0.107396	10.8237	2.65735e-27	8.23586e-26
AAEL010095	5405.03	1.7927	0.16569	10.8196	2.78018e-27	8.59589e-26
AAEL005991	8337.32	1.57536	0.145631	10.8175	2.84386e-27	8.77175e-26
AAEL012419	9698.03	1.00965	0.0935043	10.7979	3.52337e-27	1.08417e-25
AAEL006834	17957.9	-3.05552	0.284157	-10.7529	5.74128e-27	1.76244e-25
AAEL006137	579.743	6.60245	0.615318	10.7301	7.34778e-27	2.25024e-25
AAEL011750	7760.95	0.824603	0.0768677	10.7276	7.55661e-27	2.3087e-25
AAEL012279	8138.57	1.3186	0.122948	10.7249	7.77819e-27	2.37079e-25
AAEL004738	5613.12	1.29426	0.120731	10.7202	8.18105e-27	2.4877e-25
AAEL010359	11901.1	-1.19826	0.111798	-10.7181	8.37301e-27	2.54008e-25
AAEL007322	7140.84	-1.64257	0.153353	-10.711	9.0365e-27	2.73492e-25
AAEL010060	3682.56	1.0509	0.0981422	10.7079	9.34404e-27	2.82137e-25
AAEL014842	8068.93	2.10988	0.197108	10.7042	9.72761e-27	2.92356e-25
AAEL010765	55761.2	1.05773	0.0988147	10.7042	9.72783e-27	2.92356e-25
AAEL023509	1526.92	-1.92069	0.179468	-10.7021	9.94451e-27	2.98173e-25
AAEL019898	12346.8	-1.48797	0.139173	-10.6915	1.11497e-26	3.33535e-25
AAEL012841	1657.46	1.14377	0.107052	10.6843	1.2054e-26	3.59751e-25
AAEL023132	485.133	3.59308	0.336622	10.6739	1.34823e-26	4.01448e-25
AAEL005455	19803.2	-1.95511	0.183226	-10.6705	1.39944e-26	4.15737e-25
AAEL001859	2710.76	1.00949	0.0946164	10.6693	1.41741e-26	4.20108e-25
AAEL010977	56210.6	-1.07141	0.100765	-10.6328	2.09832e-26	6.20496e-25
AAEL014130	2205.3	0.962235	0.0905265	10.6293	2.17706e-26	6.42306e-25
AAEL018273	5900.36	-1.87027	0.175977	-10.6279	2.20948e-26	6.50383e-25
AAEL023069	8152.51	1.04887	0.0987065	10.6261	2.25238e-26	6.61501e-25
AAEL001690	1.19871e+06	5.11595	0.48204	10.6131	2.58964e-26	7.58824e-25
AAEL009649	1649.18	1.0939	0.103104	10.6097	2.68556e-26	7.85147e-25
AAEL019990	7595.99	-1.84989	0.174522	-10.5997	2.98832e-26	8.71683e-25
AAEL019523	23211.3	-2.02389	0.190954	-10.5988	3.01706e-26	8.7808e-25
AAEL024824	1752.22	2.32321	0.219309	10.5933	3.20116e-26	9.29561e-25
AAEL008624	3167.74	-1.30232	0.123022	-10.586	3.45995e-26	1.00245e-24
AAEL006611	2507.14	1.22448	0.115841	10.5704	4.0874e-26	1.18159e-24
AAEL006567	4665.37	-1.58569	0.150236	-10.5547	4.83359e-26	1.39417e-24
AAEL007601	123585	6.77782	0.644048	10.5238	6.71215e-26	1.93169e-24
AAEL009367	5226.35	-1.15726	0.10998	-10.5225	6.80392e-26	1.9494e-24
AAEL001581	4821.41	-0.909041	0.0863901	-10.5225	6.80336e-26	1.9494e-24
AAEL018139	4236.98	-1.92589	0.183202	-10.5124	7.57347e-26	2.16507e-24
AAEL004727	3481.06	-1.18578	0.112951	-10.4981	8.81165e-26	2.51347e-24
AAEL013249	10333.8	1.18522	0.112911	10.497	8.9212e-26	2.53909e-24
AAEL009646	20055.2	0.830883	0.079393	10.4654	1.24486e-25	3.53525e-24
AAEL007191	45772.2	3.71766	0.355367	10.4615	1.29825e-25	3.67875e-24
AAEL002555	4740.35	4.77971	0.457025	10.4583	1.34224e-25	3.79506e-24
AAEL023114	1056.79	-2.08454	0.199513	-10.4482	1.49381e-25	4.21437e-24
AAEL001496	1719.68	0.982166	0.0940177	10.4466	1.51857e-25	4.27487e-24
AAEL012126	278.441	-1.98261	0.189877	-10.4416	1.60168e-25	4.49902e-24
AAEL012482	2558.25	-3.09389	0.296561	-10.4326	1.76081e-25	4.93524e-24
AAEL011575	2692.86	-2.52532	0.242089	-10.4314	1.78259e-25	4.98545e-24
AAEL004623	1886.16	1.35607	0.130006	10.4308	1.79338e-25	5.00478e-24
AAEL003676	5087.22	-1.65537	0.15881	-10.4236	1.93406e-25	5.38572e-24
AAEL014557	3490.26	-1.40552	0.135163	-10.3987	2.51325e-25	6.98348e-24
AAEL008291	5661.65	1.12493	0.108202	10.3967	2.56789e-25	7.11995e-24
AAEL022928	1042.85	-1.62925	0.15678	-10.3919	2.69795e-25	7.46451e-24
AAEL003634	5393.14	0.969	0.0933204	10.3836	2.94509e-25	8.13085e-24
AAEL020477	2905.45	1.32928	0.128096	10.3772	3.14937e-25	8.67625e-24
AAEL006464	402.084	-3.29808	0.318005	-10.3712	3.35446e-25	9.22154e-24
AAEL012443	3875.11	4.03162	0.389402	10.3534	4.04031e-25	1.10834e-23
AAEL015275	577.331	1.31882	0.127415	10.3506	4.15777e-25	1.13813e-23
AAEL012095	11143.7	1.07251	0.103723	10.3401	4.64168e-25	1.26791e-23
AAEL017213	5546.79	0.774304	0.0749308	10.3336	4.96673e-25	1.35383e-23
AAEL026256	500.033	2.3643	0.228853	10.3311	5.09693e-25	1.38639e-23
AAEL020147	940.615	2.12456	0.206076	10.3096	6.37761e-25	1.73108e-23
AAEL015007	5070.97	1.32557	0.128978	10.2775	8.90078e-25	2.41088e-23
AAEL001448	1923.8	-1.94531	0.189606	-10.2597	1.06984e-24	2.89171e-23
AAEL007592	5491.43	3.02231	0.295173	10.2391	1.32467e-24	3.573e-23
AAEL001607	3619.48	-1.64407	0.160635	-10.2348	1.38469e-24	3.7271e-23
AAEL019807	243.5	4.1904	0.409612	10.2302	1.45259e-24	3.90171e-23
AAEL019499	2534.69	-1.20344	0.11779	-10.2168	1.66801e-24	4.47104e-23
AAEL001141	4902.23	-0.932721	0.0913527	-10.2101	1.78661e-24	4.779e-23
AAEL021894	19039	1.17829	0.115573	10.1952	2.08325e-24	5.56095e-23
AAEL014961	977.404	1.62818	0.159807	10.1884	2.23398e-24	5.95098e-23
AAEL015593	27834.7	1.35534	0.133263	10.1705	2.68649e-24	7.14162e-23
AAEL024618	13723.3	-1.51834	0.149543	-10.1532	3.20675e-24	8.50713e-23
AAEL007395	2018.25	1.39097	0.137509	10.1155	4.71468e-24	1.24818e-22
AAEL001464	5984.45	2.86063	0.282832	10.1142	4.77697e-24	1.26208e-22
AAEL009111	580.68	8.16001	0.806869	10.1132	4.8292e-24	1.27327e-22
AAEL001198	1199.69	-1.78982	0.177048	-10.1092	5.027e-24	1.32272e-22
AAEL001114	1575.05	0.940463	0.0931195	10.0995	5.55093e-24	1.4576e-22
AAEL020485	7201.59	1.57533	0.156038	10.0958	5.76557e-24	1.51083e-22
AAEL010073	2595.58	-0.923128	0.0914386	-10.0956	5.77708e-24	1.51083e-22
AAEL002467	574033	4.87416	0.483401	10.0831	6.5646e-24	1.71331e-22
AAEL008938	1909.09	0.865193	0.0858792	10.0745	7.16001e-24	1.86493e-22
AAEL010488	2510.4	1.8194	0.180638	10.0721	7.34071e-24	1.90814e-22
AAEL007682	4613.46	-1.84681	0.183749	-10.0507	9.12254e-24	2.36654e-22
AAEL013253	3426.11	-1.37387	0.136725	-10.0485	9.33173e-24	2.41594e-22
AAEL024775	1260.07	1.42106	0.141449	10.0465	9.52249e-24	2.46039e-22
AAEL014207	576.742	4.13922	0.412297	10.0394	1.02274e-23	2.63723e-22
AAEL004905	4193.19	-1.83575	0.182975	-10.0328	1.09394e-23	2.81521e-22
AAEL013715	241439	5.50399	0.548908	10.0272	1.15806e-23	2.97427e-22
AAEL006577	10848.1	1.85913	0.18547	10.0239	1.19736e-23	3.0691e-22
AAEL006054	266.311	-3.14346	0.313605	-10.0237	1.19987e-23	3.06943e-22
AAEL011217	1884.99	1.3814	0.13786	10.0203	1.24064e-23	3.16743e-22
AAEL011019	6439.35	0.668839	0.0667641	10.0179	1.2712e-23	3.23904e-22
AAEL009387	20922.3	1.23578	0.123386	10.0156	1.30215e-23	3.31136e-22
AAEL001151	8112.67	1.9084	0.190578	10.0138	1.32627e-23	3.36607e-22
AAEL001769	8179.7	-1.01115	0.101012	-10.0102	1.37485e-23	3.4825e-22
AAEL025807	26945.3	-2.6676	0.266824	-9.9976	1.56132e-23	3.94708e-22
AAEL007798	933.263	-1.43979	0.144027	-9.9967	1.57563e-23	3.97547e-22
AAEL022406	3195.19	-0.905387	0.090583	-9.99512	1.60095e-23	4.03147e-22
AAEL029070	22263	3.27561	0.327733	9.99477	1.60667e-23	4.03797e-22
AAEL010220	1208.02	1.92592	0.192761	9.99124	1.66494e-23	4.17627e-22
AAEL009702	2334.86	0.753907	0.0754585	9.99101	1.66875e-23	4.1777e-22
AAEL010477	1503.78	3.79702	0.380406	9.98149	1.83694e-23	4.58986e-22
AAEL001850	1101.12	-1.45301	0.145614	-9.97855	1.89217e-23	4.7187e-22
AAEL010585	12091.1	1.29827	0.130244	9.968	2.10428e-23	5.23756e-22
AAEL003006	4599.94	1.43747	0.144238	9.96596	2.14782e-23	5.33561e-22
AAEL000622	4573	-0.884905	0.0889328	-9.95027	2.51505e-23	6.23588e-22
AAEL010048	2776.12	1.104	0.111007	9.94534	2.6427e-23	6.5398e-22
AAEL003907	3363.66	0.983946	0.0989674	9.94212	2.72957e-23	6.74182e-22
AAEL019845	18400.1	1.5279	0.153876	9.92947	3.09894e-23	7.63951e-22
AAEL015018	3892.1	-1.6616	0.167404	-9.92569	3.21876e-23	7.91974e-22
AAEL007718	27270.7	0.807627	0.0814253	9.91863	3.45467e-23	8.484e-22
AAEL017056	1199.34	2.89351	0.291962	9.91056	3.7454e-23	9.1805e-22
AAEL005959	743.596	-2.52462	0.254974	-9.90146	4.10227e-23	1.00172e-21
AAEL010891	209.398	-1.91157	0.193057	-9.9016	4.09664e-23	1.00172e-21
AAEL008406	8991.07	1.63271	0.165018	9.89416	4.41282e-23	1.07551e-21
AAEL006587	510.378	-1.7922	0.181148	-9.89358	4.4387e-23	1.07978e-21
AAEL001646	2109.08	-2.46764	0.249515	-9.88974	4.61226e-23	1.11989e-21
AAEL010946	800.177	-2.00124	0.203108	-9.85306	6.64874e-23	1.61132e-21
AAEL003039	8266.32	-1.43888	0.146082	-9.84986	6.8638e-23	1.66032e-21
AAEL024153	941.147	3.51925	0.358103	9.82749	8.57313e-23	2.06991e-21
AAEL005215	2650.72	-1.04505	0.106379	-9.82391	8.88319e-23	2.14077e-21
AAEL025053	372.253	3.85358	0.392507	9.81786	9.43281e-23	2.26898e-21
AAEL001657	1135.14	0.895261	0.0912343	9.81277	9.92029e-23	2.38179e-21
AAEL019672	2838.31	-1.70223	0.173666	-9.80169	1.10716e-22	2.65327e-21
AAEL004427	3022.43	0.974295	0.0994034	9.80143	1.11005e-22	2.65527e-21
AAEL004583	7313.63	-1.72067	0.175596	-9.79901	1.13693e-22	2.71453e-21
AAEL011536	5356.83	1.99072	0.20352	9.78145	1.35265e-22	3.22362e-21
AAEL017356	1432.76	3.69537	0.378352	9.76702	1.5597e-22	3.71018e-21
AAEL001580	683.372	2.80686	0.287391	9.76669	1.56475e-22	3.71534e-21
AAEL023242	3115.4	0.89618	0.0917631	9.76623	1.57186e-22	3.72536e-21
AAEL012658	16764.5	0.976776	0.100095	9.75847	1.69699e-22	4.01454e-21
AAEL018248	272.996	-2.38239	0.244356	-9.74963	1.85137e-22	4.37174e-21
AAEL009016	522.09	1.80274	0.184963	9.74649	1.90948e-22	4.50073e-21
AAEL001898	7544.45	-1.61563	0.165876	-9.73995	2.03647e-22	4.79127e-21
AAEL002412	2737.24	2.21296	0.227233	9.73872	2.06137e-22	4.84104e-21
AAEL024195	7046.63	-0.841271	0.0864087	-9.73595	2.11823e-22	4.96552e-21
AAEL011004	468.864	3.07523	0.315913	9.73443	2.15029e-22	5.03151e-21
AAEL015393	664.735	1.42942	0.146922	9.72917	2.26436e-22	5.28884e-21
AAEL027229	818.387	6.73676	0.693538	9.71361	2.63823e-22	6.15094e-21
AAEL026028	2025.18	0.980724	0.101011	9.70908	2.75805e-22	6.41869e-21
AAEL019826	8680.41	-0.987411	0.101755	-9.70378	2.90545e-22	6.74953e-21
AAEL001703	1.17562e+06	-1.46991	0.151528	-9.7006	2.99723e-22	6.95023e-21
AAEL013533	39863.4	-1.06614	0.110196	-9.67492	3.85395e-22	8.92081e-21
AAEL007915	27960	1.14896	0.118893	9.66385	4.29425e-22	9.92217e-21
AAEL023729	436972	4.35767	0.451769	9.64579	5.12159e-22	1.18126e-20
AAEL010504	603.729	1.5819	0.164017	9.64471	5.17592e-22	1.19166e-20
AAEL011560	4113.35	1.06503	0.110516	9.63684	5.588e-22	1.28424e-20
AAEL002049	4073.47	-2.11804	0.2198	-9.63623	5.62129e-22	1.2896e-20
AAEL004068	1322.44	0.822467	0.0854939	9.62018	6.5714e-22	1.50489e-20
AAEL006794	15931.1	1.64017	0.170566	9.61601	6.84343e-22	1.5644e-20
AAEL011898	5703.42	-1.76714	0.183985	-9.60476	7.63335e-22	1.74189e-20
AAEL026243	6619.5	0.768346	0.0801981	9.5806	9.64792e-22	2.19771e-20
AAEL005730	1590.16	0.865304	0.0903357	9.57876	9.82195e-22	2.23341e-20
AAEL011161	2450.64	-1.3286	0.139189	-9.54532	1.35694e-21	3.0801e-20
AAEL010731	4873.19	-1.62085	0.170351	-9.5148	1.82064e-21	4.1254e-20
AAEL011891	643.842	8.71477	0.916073	9.51318	1.84917e-21	4.18268e-20
AAEL025600	738.393	1.11733	0.117616	9.49982	2.1026e-21	4.73931e-20
AAEL010135	1097.37	0.963546	0.101426	9.49995	2.09986e-21	4.73931e-20
AAEL024982	900.938	-2.22736	0.234471	-9.49948	2.10942e-21	4.74637e-20
AAEL005457	9896.84	0.909381	0.095741	9.49834	2.13267e-21	4.79034e-20
AAEL028635	12466.3	1.807	0.190279	9.49657	2.16927e-21	4.86407e-20
AAEL026825	6676.86	-3.42967	0.361166	-9.49611	2.17886e-21	4.87708e-20
AAEL006433	5180.62	-0.954988	0.100572	-9.49557	2.19006e-21	4.89366e-20
AAEL028236	468.054	-1.63318	0.172112	-9.48903	2.3319e-21	5.20159e-20
AAEL004733	3958.15	1.10872	0.116848	9.48859	2.3419e-21	5.21487e-20
AAEL010513	9321.39	1.02895	0.108564	9.47786	2.59539e-21	5.76937e-20
AAEL014821	18702.9	2.01722	0.212988	9.47103	2.77108e-21	6.14931e-20
AAEL019461	9552.75	-1.70644	0.180357	-9.46146	3.03675e-21	6.72729e-20
AAEL026894	3864.51	-0.86959	0.0919963	-9.45244	3.3101e-21	7.32027e-20
AAEL004520	8163.94	-1.10052	0.11648	-9.44817	3.4482e-21	7.61261e-20
AAEL021813	6399.31	-1.54685	0.16396	-9.4343	3.93608e-21	8.67486e-20
AAEL008707	1907.68	-0.843089	0.0894306	-9.42729	4.20815e-21	9.25865e-20
AAEL019685	6705.42	-1.76794	0.18759	-9.42449	4.3221e-21	9.49316e-20
AAEL002752	245.642	1.56519	0.166167	9.41939	4.53732e-21	9.94893e-20
AAEL009887	1979.61	0.909102	0.0966005	9.41095	4.91695e-21	1.0763e-19
AAEL000984	203.626	-2.45173	0.260645	-9.40637	5.13562e-21	1.12226e-19
AAEL018699	6539.76	-1.33672	0.14218	-9.40158	5.37506e-21	1.1726e-19
AAEL002700	2697.3	0.720148	0.0766018	9.40119	5.39512e-21	1.17499e-19
AAEL010689	2491.67	0.942111	0.100275	9.39532	5.70461e-21	1.2403e-19
AAEL008733	3038.08	0.963993	0.102691	9.38729	6.15657e-21	1.33631e-19
AAEL015283	3207.69	-1.33262	0.142009	-9.38404	6.34935e-21	1.37584e-19
AAEL007891	4445.96	1.08753	0.115938	9.38034	6.5759e-21	1.42253e-19
AAEL015100	12868.7	1.04896	0.111841	9.37906	6.65636e-21	1.43753e-19
AAEL010196	839836	3.41389	0.364019	9.37834	6.70189e-21	1.44494e-19
AAEL009968	9620.05	2.24406	0.239391	9.37405	6.98043e-21	1.50248e-19
AAEL010373	6678.24	-1.19494	0.127523	-9.37037	7.22796e-21	1.55317e-19
AAEL019656	8911.89	-0.969248	0.103572	-9.35817	8.11281e-21	1.74041e-19
AAEL010379	375.098	3.09376	0.330705	9.35504	8.35701e-21	1.78982e-19
AAEL027686	1917.77	-2.57507	0.275477	-9.34767	8.95995e-21	1.91576e-19
AAEL008687	4044.39	1.25573	0.134368	9.34543	9.15159e-21	1.9535e-19
AAEL004221	2113.33	-1.66906	0.178776	-9.33602	1.00025e-20	2.13161e-19
AAEL008079	94329.6	-1.76221	0.188766	-9.33541	1.00599e-20	2.1403e-19
AAEL012688	1616.7	4.43721	0.47561	9.32951	1.06364e-20	2.25922e-19
AAEL000752	6204.2	-1.26432	0.135565	-9.32625	1.09686e-20	2.32596e-19
AAEL004092	21993.8	2.73179	0.29297	9.32447	1.11535e-20	2.36128e-19
AAEL001642	875.192	-1.65517	0.177519	-9.3239	1.12144e-20	2.37029e-19
AAEL005336	47391.9	2.60372	0.279279	9.32303	1.13066e-20	2.38586e-19
AAEL007029	11276.5	-0.91461	0.0981307	-9.32032	1.1599e-20	2.44356e-19
AAEL003899	34840	-1.82734	0.196084	-9.3192	1.17218e-20	2.4654e-19
AAEL005383	641.741	1.27546	0.136933	9.31453	1.22489e-20	2.57207e-19
AAEL006446	1230.11	-3.18162	0.341616	-9.31343	1.23765e-20	2.59464e-19
AAEL005069	20242.5	0.82918	0.0890983	9.30636	1.32291e-20	2.76888e-19
AAEL003383	5382.21	0.748635	0.0805054	9.2992	1.41509e-20	2.95702e-19
AAEL013276	1185.63	3.3681	0.362218	9.29853	1.42398e-20	2.97077e-19
AAEL000214	1414.74	0.979086	0.105435	9.28619	1.59904e-20	3.3306e-19
AAEL008894	219.736	2.74017	0.295093	9.2858	1.60496e-20	3.33755e-19
AAEL004697	5705.97	0.993168	0.107	9.28195	1.66408e-20	3.45491e-19
AAEL007560	3653.92	-1.38688	0.14959	-9.2712	1.84058e-20	3.8152e-19
AAEL008590	5655.76	1.37946	0.1488	9.27057	1.85155e-20	3.83178e-19
AAEL020915	887.238	-1.63573	0.176521	-9.26647	1.92413e-20	3.97561e-19
AAEL003951	1962.97	-2.37114	0.256078	-9.25944	2.05508e-20	4.23938e-19
AAEL005955	568.985	-2.17128	0.234605	-9.25506	2.14101e-20	4.40959e-19
AAEL003959	2339.29	-1.30099	0.140596	-9.25343	2.17397e-20	4.46322e-19
AAEL003103	18871.5	0.585159	0.0632368	9.25346	2.1735e-20	4.46322e-19
AAEL001177	2069.28	1.32705	0.143487	9.24858	2.27488e-20	4.66297e-19
AAEL012460	1467.96	0.877524	0.0949852	9.23853	2.49902e-20	5.11427e-19
AAEL019864	2214.47	1.0459	0.113229	9.23702	2.53453e-20	5.17872e-19
AAEL010602	3757.35	-1.92615	0.208573	-9.23488	2.58587e-20	5.27525e-19
AAEL010321	3447.69	1.86326	0.2018	9.23322	2.62613e-20	5.34893e-19
AAEL004127	1191.83	-1.70268	0.184526	-9.22732	2.77493e-20	5.64309e-19
AAEL005177	10382.4	-1.60216	0.173705	-9.22347	2.87649e-20	5.84041e-19
AAEL003953	20783.6	-1.24102	0.134622	-9.21856	3.01107e-20	6.10404e-19
AAEL003993	11172.9	1.98036	0.214884	9.21597	3.0847e-20	6.2435e-19
AAEL009105	4750.95	-1.32335	0.143725	-9.20748	3.33877e-20	6.74714e-19
AAEL001968	5516.34	0.77462	0.0842165	9.19796	3.64811e-20	7.35556e-19
AAEL012914	3471.34	1.10222	0.119834	9.19787	3.65125e-20	7.35556e-19
AAEL023977	1329.9	0.813479	0.0885098	9.19084	3.89802e-20	7.84044e-19
AAEL012943	6523.56	0.970517	0.105693	9.18243	4.21468e-20	8.46416e-19
AAEL007842	550.637	-1.65816	0.181053	-9.15844	5.26548e-20	1.0558e-18
AAEL013114	1306.7	1.70957	0.186832	9.15031	5.67684e-20	1.13651e-18
AAEL009171	5453.66	-2.09562	0.229062	-9.14869	5.76266e-20	1.15191e-18
AAEL026822	73.428	3.38243	0.369801	9.14662	5.87409e-20	1.17236e-18
AAEL023310	1042.11	-2.07095	0.226476	-9.14421	6.00691e-20	1.19702e-18
AAEL008266	2118.56	-1.25425	0.1372	-9.14173	6.14608e-20	1.22286e-18
AAEL007383	218263	1.21414	0.132909	9.13514	6.53233e-20	1.29771e-18
AAEL013286	1049.83	-1.58468	0.173578	-9.12948	6.88261e-20	1.36519e-18
AAEL008052	305.083	-2.39865	0.263025	-9.11949	7.54807e-20	1.49489e-18
AAEL006630	2740.65	2.1885	0.240004	9.11862	7.60889e-20	1.50462e-18
AAEL006216	698.219	-2.70181	0.296348	-9.11703	7.72093e-20	1.52444e-18
AAEL007039	1300.67	2.91164	0.319411	9.11567	7.8184e-20	1.54133e-18
AAEL013818	2193.32	0.879534	0.0967158	9.094	9.54602e-20	1.87903e-18
AAEL013121	2393.22	1.16752	0.128539	9.08298	1.05638e-19	2.0762e-18
AAEL004406	1594.98	1.30793	0.144109	9.07596	1.12678e-19	2.2112e-18
AAEL020128	190.578	-2.72695	0.300629	-9.07082	1.18128e-19	2.31464e-18
AAEL014820	580.622	2.01966	0.222797	9.06506	1.24535e-19	2.43646e-18
AAEL009125	4457.43	-1.45246	0.160383	-9.05614	1.35145e-19	2.64003e-18
AAEL021941	863.076	-1.79331	0.19828	-9.04437	1.50525e-19	2.93604e-18
AAEL000410	7259.84	0.922928	0.102143	9.03566	1.63013e-19	3.17481e-18
AAEL005522	4121.67	0.927958	0.102725	9.03339	1.6643e-19	3.23647e-18
AAEL002428	4872.27	-1.28566	0.142354	-9.03142	1.69461e-19	3.29046e-18
AAEL008151	213.422	-2.13407	0.236351	-9.02927	1.72823e-19	3.35068e-18
AAEL002804	21332.9	0.866977	0.0960459	9.02669	1.76939e-19	3.42534e-18
AAEL009232	12863.8	2.60264	0.288594	9.01832	1.90991e-19	3.69182e-18
AAEL020265	3006.33	0.69012	0.0765976	9.00968	2.0665e-19	3.98852e-18
AAEL000590	2908.86	-2.57397	0.285771	-9.00713	2.11513e-19	4.07629e-18
AAEL003416	4027.08	-0.766861	0.085267	-8.99365	2.39152e-19	4.60207e-18
AAEL000915	22426.1	-1.46835	0.163272	-8.99329	2.39948e-19	4.6105e-18
AAEL018313	561.991	2.1376	0.237834	8.98776	2.5232e-19	4.84102e-18
AAEL024876	371.608	2.16083	0.240506	8.98451	2.59881e-19	4.97868e-18
AAEL004865	68482.5	-1.07229	0.119384	-8.98184	2.66269e-19	5.09349e-18
AAEL027013	9694.43	1.30698	0.145538	8.98035	2.69917e-19	5.15561e-18
AAEL020950	172.205	-3.64762	0.406287	-8.97792	2.75935e-19	5.26276e-18
AAEL012632	5677.52	1.33615	0.148832	8.97755	2.76851e-19	5.27244e-18
AAEL017064	4757.9	0.983887	0.10968	8.97052	2.95114e-19	5.60449e-18
AAEL006091	5908.07	0.638955	0.0712284	8.97051	2.95156e-19	5.60449e-18
AAEL011568	2857.57	1.13587	0.126625	8.97033	2.95635e-19	5.60532e-18
AAEL006010	896.469	0.940299	0.104865	8.96672	3.05462e-19	5.78315e-18
AAEL001331	8718.64	1.31125	0.1463	8.96276	3.16637e-19	5.98593e-18
AAEL009150	21757	1.85159	0.206635	8.96068	3.22675e-19	6.09114e-18
AAEL013068	15384.4	0.674849	0.0753281	8.9588	3.28241e-19	6.18715e-18
AAEL006362	6105.39	1.01566	0.113376	8.95828	3.2978e-19	6.20709e-18
AAEL022615	695.45	2.24302	0.250464	8.95545	3.38345e-19	6.35901e-18
AAEL019522	376.619	-1.65478	0.184785	-8.95516	3.39241e-19	6.36657e-18
AAEL019819	4930.87	1.48968	0.1666	8.94165	3.83397e-19	7.1848e-18
AAEL006174	4329.72	1.06012	0.118639	8.93569	4.04649e-19	7.57204e-18
AAEL019626	1212.11	1.77692	0.198882	8.93453	4.08911e-19	7.64071e-18
AAEL000934	9908.36	0.696677	0.0780467	8.9264	4.40091e-19	8.21142e-18
AAEL009647	3377.36	0.890814	0.0998816	8.9187	4.71806e-19	8.79045e-18
AAEL021389	366.324	1.36515	0.153285	8.90596	5.29277e-19	9.847e-18
AAEL003695	709.566	1.48069	0.166309	8.90327	5.42262e-19	1.0074e-17
AAEL006264	4877.53	-1.12509	0.126445	-8.89792	5.69031e-19	1.05561e-17
AAEL022213	2949.72	1.1118	0.124993	8.8949	5.84698e-19	1.08312e-17
AAEL020368	128.081	7.78173	0.875535	8.88798	6.22313e-19	1.15114e-17
AAEL000967	3630.4	2.52188	0.28389	8.88328	6.49153e-19	1.19907e-17
AAEL010738	17820.7	1.14206	0.128659	8.87661	6.89298e-19	1.2714e-17
AAEL005329	3033.49	-1.98936	0.224299	-8.86923	7.36517e-19	1.35656e-17
AAEL008260	2946.94	-1.32981	0.150003	-8.86524	7.6341e-19	1.40409e-17
AAEL009324	3800.18	1.21861	0.137504	8.86234	7.83514e-19	1.43901e-17
AAEL008742	4484.72	1.57146	0.177406	8.858	8.14592e-19	1.49396e-17
AAEL021703	2024.7	-1.25263	0.141533	-8.85045	8.71663e-19	1.59636e-17
AAEL021450	12124.6	-1.00253	0.113435	-8.8379	9.75367e-19	1.78375e-17
AAEL000832	1523.88	0.847391	0.0958898	8.83713	9.82068e-19	1.79346e-17
AAEL008521	10459.7	0.719128	0.0814085	8.83358	1.01381e-18	1.84881e-17
AAEL005201	3154.81	1.31628	0.1491	8.82816	1.0641e-18	1.93777e-17
AAEL002898	984.922	2.3094	0.261821	8.82056	1.13891e-18	2.07108e-17
AAEL008374	11305.3	-0.831089	0.0943273	-8.8107	1.24367e-18	2.25839e-17
AAEL002668	1133.2	1.84852	0.209854	8.80859	1.26728e-18	2.29804e-17
AAEL011326	1294.03	0.732099	0.0831714	8.80228	1.34061e-18	2.4276e-17
AAEL010224	4548.84	0.894922	0.101837	8.78782	1.52487e-18	2.75352e-17
AAEL007946	956.832	-1.95239	0.222168	-8.7879	1.52385e-18	2.75352e-17
AAEL002152	1956.73	-1.14684	0.13059	-8.782	1.606e-18	2.89596e-17
AAEL012078	2093.39	-1.34863	0.153594	-8.78049	1.62766e-18	2.93092e-17
AAEL021826	888.359	-1.55741	0.17747	-8.77566	1.69907e-18	3.05525e-17
AAEL001236	3352.78	1.31234	0.149626	8.77081	1.77387e-18	3.18531e-17
AAEL001293	5795.04	2.02915	0.231415	8.76843	1.81173e-18	3.24877e-17
AAEL009764	13743.6	1.64278	0.187367	8.76771	1.8234e-18	3.26515e-17
AAEL024807	10345.6	-1.02256	0.116646	-8.76637	1.84525e-18	3.29969e-17
AAEL005580	1506.86	-1.02958	0.117564	-8.75756	1.99519e-18	3.56288e-17
AAEL008165	280.724	-1.51149	0.172596	-8.75739	1.99829e-18	3.56348e-17
AAEL006415	10230.9	1.79937	0.205486	8.75663	2.01167e-18	3.58239e-17
AAEL010966	3242.49	1.07745	0.123068	8.75494	2.0422e-18	3.63173e-17
AAEL008823	617.169	-2.58513	0.295316	-8.75376	2.06364e-18	3.66481e-17
AAEL004938	4208.26	-1.03496	0.118278	-8.75021	2.12964e-18	3.77682e-17
AAEL024700	4462.78	1.22543	0.14016	8.74307	2.26857e-18	4.01767e-17
AAEL008250	708.152	-1.31779	0.150975	-8.72857	2.57914e-18	4.56143e-17
AAEL003831	11400.3	-0.799143	0.0915789	-8.72628	2.63183e-18	4.64825e-17
AAEL000199	4078.95	1.74668	0.200275	8.72143	2.74717e-18	4.84532e-17
AAEL020761	896.569	1.33612	0.153238	8.71924	2.80084e-18	4.93323e-17
AAEL002299	961.115	-1.71242	0.196628	-8.70894	3.06726e-18	5.39511e-17
AAEL006640	827.897	1.25147	0.143751	8.70577	3.15427e-18	5.5406e-17
AAEL010362	302.904	1.75703	0.201897	8.70261	3.24326e-18	5.68916e-17
AAEL012679	533.539	3.14376	0.361316	8.70086	3.29381e-18	5.76999e-17
AAEL001215	5118.77	-1.34257	0.154335	-8.69906	3.34659e-18	5.85449e-17
AAEL006912	7147.97	1.81788	0.208992	8.69834	3.36775e-18	5.88353e-17
AAEL021667	21679.1	-1.10504	0.127112	-8.6934	3.51745e-18	6.13674e-17
AAEL027549	10390.2	1.89089	0.217859	8.67945	3.97696e-18	6.92904e-17
AAEL011527	15201.7	1.36856	0.157706	8.67791	4.03109e-18	7.01388e-17
AAEL010013	341.08	1.33203	0.153729	8.66481	4.52284e-18	7.85889e-17
AAEL000581	6255.47	-2.0903	0.241442	-8.65759	4.81835e-18	8.3611e-17
AAEL009377	9230.68	0.609809	0.0704489	8.65605	4.88405e-18	8.4583e-17
AAEL009406	6528.1	-1.47765	0.170709	-8.65597	4.88749e-18	8.4583e-17
AAEL001411	42424.8	0.99168	0.114576	8.65525	4.91835e-18	8.5003e-17
AAEL002817	232.207	2.31459	0.26743	8.65492	4.93237e-18	8.51313e-17
AAEL010068	4056.07	1.56849	0.181249	8.65382	4.98039e-18	8.58452e-17
AAEL008700	865.057	1.04423	0.120715	8.65043	5.13058e-18	8.83159e-17
AAEL003014	4261.14	-2.07471	0.239996	-8.64476	5.39174e-18	9.26876e-17
AAEL020112	378.942	-2.6598	0.307722	-8.64349	5.45212e-18	9.36008e-17
AAEL005976	1514.19	0.906056	0.104831	8.64303	5.47397e-18	9.38509e-17
AAEL012347	3670.44	-1.46783	0.169878	-8.64051	5.59648e-18	9.5824e-17
AAEL007442	1424.71	-2.17835	0.252192	-8.63769	5.73626e-18	9.80871e-17
AAEL011995	2876.26	-1.11672	0.12939	-8.63062	6.10223e-18	1.04207e-16
AAEL011133	2606.13	-1.18247	0.137019	-8.62998	6.13621e-18	1.04648e-16
AAEL027060	2876.79	2.22093	0.257576	8.62246	6.55321e-18	1.11612e-16
AAEL023687	151.572	-24.0086	2.78479	-8.62133	6.61788e-18	1.12565e-16
AAEL002012	2061.17	0.877182	0.101788	8.6177	6.83123e-18	1.16041e-16
AAEL012094	4357.83	0.905605	0.105128	8.61427	7.0386e-18	1.19406e-16
AAEL011314	3503.23	1.48095	0.172025	8.60891	7.37608e-18	1.24967e-16
AAEL009879	1411.26	1.09596	0.127522	8.59426	8.38015e-18	1.41693e-16
AAEL021760	2397	0.888102	0.103337	8.59419	8.3853e-18	1.41693e-16
AAEL027839	11705.8	1.29005	0.150111	8.59399	8.39977e-18	1.41752e-16
AAEL019565	2757.82	1.55889	0.181468	8.59048	8.66032e-18	1.45957e-16
AAEL001126	4770.73	-0.802437	0.0934277	-8.58886	8.78345e-18	1.47839e-16
AAEL011732	1842.15	-0.986593	0.114954	-8.5825	9.28307e-18	1.56045e-16
AAEL008672	24756	1.13703	0.132542	8.57866	9.59849e-18	1.61137e-16
AAEL005728	5966.73	1.16415	0.135712	8.57809	9.64587e-18	1.61722e-16
AAEL014605	52008.2	-1.57519	0.183644	-8.5774	9.70389e-18	1.62483e-16
AAEL002329	1227.66	0.948639	0.110693	8.56997	1.03515e-17	1.73103e-16
AAEL002137	3280.95	-0.714057	0.0835053	-8.55104	1.21989e-17	2.03732e-16
AAEL022849	4661.99	-0.948671	0.110947	-8.5507	1.22344e-17	2.04059e-16
AAEL003277	743.242	-1.95735	0.229319	-8.53549	1.39569e-17	2.32488e-16
AAEL001561	3892.79	1.1991	0.140586	8.5293	1.47238e-17	2.44947e-16
AAEL023516	2701.54	1.45631	0.171214	8.50576	1.8041e-17	2.99745e-16
AAEL000750	1463.29	0.829313	0.0975288	8.50327	1.84329e-17	3.05862e-16
AAEL023561	283.878	-2.34568	0.275933	-8.50091	1.88117e-17	3.11747e-16
AAEL018061	624.377	4.39633	0.517197	8.50031	1.89085e-17	3.12564e-16
AAEL005799	2824.29	0.663696	0.0780791	8.5003	1.89095e-17	3.12564e-16
AAEL010843	19426.9	0.890907	0.104847	8.49719	1.94239e-17	3.20656e-16
AAEL014843	48096.2	2.66879	0.314365	8.48949	2.07555e-17	3.422e-16
AAEL011323	5931.63	-1.29906	0.153214	-8.47876	2.27601e-17	3.74771e-16
AAEL001570	948.294	-1.50589	0.177624	-8.47797	2.29154e-17	3.76848e-16
AAEL023471	68.5124	5.75359	0.67875	8.47674	2.31591e-17	3.8037e-16
AAEL001273	6905.66	0.788588	0.0930619	8.4738	2.37506e-17	3.89588e-16
AAEL014534	1033.05	-0.869147	0.102584	-8.47251	2.40159e-17	3.9344e-16
AAEL010939	1935.84	0.626462	0.0739603	8.47025	2.44866e-17	4.00641e-16
AAEL001187	1718.02	0.793293	0.0936634	8.46962	2.46204e-17	4.02321e-16
AAEL023654	367.241	1.34503	0.158922	8.46348	2.59523e-17	4.23548e-16
AAEL015070	12995.3	1.69383	0.200332	8.45511	2.78826e-17	4.53982e-16
AAEL012227	10839.2	1.21533	0.143739	8.45509	2.78875e-17	4.53982e-16
AAEL008471	2737.53	1.51018	0.178743	8.44891	2.94035e-17	4.78057e-16
AAEL010591	2166.6	2.01793	0.239107	8.43943	3.18902e-17	5.17834e-16
AAEL026843	26428	-3.37944	0.400493	-8.4382	3.22271e-17	5.22646e-16
AAEL019650	202.216	-4.23656	0.502394	-8.43275	3.37641e-17	5.46885e-16
AAEL003245	2385.87	-1.15147	0.13669	-8.42398	3.6392e-17	5.8871e-16
AAEL018237	4465.7	0.683258	0.0811496	8.41974	3.77321e-17	6.09624e-16
AAEL008141	8488.45	-2.28121	0.271044	-8.41638	3.88284e-17	6.26551e-16
AAEL011177	202.074	3.15507	0.374886	8.41607	3.89313e-17	6.27427e-16
AAEL000444	11302.2	0.848256	0.100884	8.40819	4.16369e-17	6.70192e-16
AAEL026671	772.507	-1.07915	0.128499	-8.3981	4.53765e-17	7.29476e-16
AAEL009479	5566.43	9.88171	1.17668	8.39793	4.54402e-17	7.29589e-16
AAEL011637	942.324	0.767044	0.0913671	8.39519	4.65136e-17	7.45896e-16
AAEL004138	782.131	-1.31429	0.156662	-8.38933	4.88911e-17	7.83047e-16
AAEL002583	228.093	2.12875	0.253796	8.38764	4.9598e-17	7.93383e-16
AAEL011928	1107.94	-2.08955	0.249276	-8.38249	5.18197e-17	8.27895e-16
AAEL018120	2094.28	-2.40282	0.286935	-8.37411	5.56409e-17	8.87844e-16
AAEL005846	1289.51	1.42424	0.170093	8.37331	5.60235e-17	8.92845e-16
AAEL006140	577.261	1.27202	0.151953	8.3711	5.7081e-17	9.08574e-16
AAEL012395	10484	5.62062	0.671482	8.37046	5.73938e-17	9.12428e-16
AAEL000670	5185.26	4.83394	0.577929	8.36425	6.04971e-17	9.60577e-16
AAEL021029	477.976	-2.97753	0.356143	-8.36048	6.24614e-17	9.90547e-16
AAEL009372	2058.68	-0.921015	0.110216	-8.35645	6.46341e-17	1.02374e-15
AAEL014715	8972.15	0.667318	0.0799008	8.35183	6.72107e-17	1.06325e-15
AAEL002508	6101.53	0.652929	0.0782433	8.34485	7.13021e-17	1.12659e-15
AAEL022941	2097.15	-0.773776	0.0927924	-8.33879	7.5054e-17	1.18442e-15
AAEL008876	39586.9	3.42148	0.410505	8.3348	7.76314e-17	1.2236e-15
AAEL004053	640.84	1.16434	0.139764	8.33077	8.03161e-17	1.26282e-15
AAEL022280	437.719	-2.90724	0.348973	-8.33086	8.02547e-17	1.26282e-15
AAEL026736	2532.44	0.961043	0.115414	8.32693	8.29633e-17	1.30286e-15
AAEL011012	799.945	-1.87324	0.225073	-8.32283	8.58907e-17	1.34555e-15
AAEL012171	7014.38	0.908121	0.109111	8.32289	8.58452e-17	1.34555e-15
AAEL001879	512.948	-1.59652	0.191905	-8.31934	8.84509e-17	1.38398e-15
AAEL007892	12261.5	2.19916	0.264623	8.31052	9.52856e-17	1.48911e-15
AAEL008100	2593.34	0.870271	0.104908	8.29555	1.08084e-16	1.68709e-15
AAEL003347	6240.5	-2.14846	0.259073	-8.29286	1.10556e-16	1.72358e-15
AAEL026536	737.418	1.13255	0.136583	8.29201	1.11346e-16	1.7338e-15
AAEL005037	7853.45	1.63031	0.196953	8.27766	1.25615e-16	1.95363e-15
AAEL004620	3939.63	0.520059	0.0628467	8.27503	1.28424e-16	1.9949e-15
AAEL012583	2400.19	-1.00395	0.121596	-8.25641	1.50114e-16	2.32902e-15
AAEL001416	1879.72	0.727875	0.088189	8.25358	1.5372e-16	2.3821e-15
AAEL024503	74.1991	7.8148	0.94715	8.25086	1.57253e-16	2.43392e-15
AAEL004710	775.058	3.34515	0.405488	8.24967	1.58831e-16	2.4554e-15
AAEL012083	2529.64	-1.15184	0.139676	-8.2465	1.63102e-16	2.51842e-15
AAEL001954	1776.96	-1.12888	0.136925	-8.24452	1.65829e-16	2.55745e-15
AAEL008391	228.006	1.5795	0.191596	8.24389	1.66699e-16	2.56781e-15
AAEL025611	4364.96	1.31653	0.15992	8.23239	1.8352e-16	2.82354e-15
AAEL005022	2193.6	0.975218	0.118542	8.22674	1.92378e-16	2.9563e-15
AAEL014614	22414.4	-1.53739	0.187088	-8.2175	2.07783e-16	3.18922e-15
AAEL007261	924.371	0.969226	0.118009	8.21316	2.15437e-16	3.30277e-15
AAEL012266	16345.5	2.31252	0.281595	8.21224	2.17101e-16	3.32432e-15
AAEL017395	2951.03	-1.03699	0.126379	-8.20534	2.29933e-16	3.51665e-15
AAEL009042	1548.59	0.880024	0.107315	8.20037	2.3964e-16	3.66076e-15
AAEL027088	1971.98	1.10471	0.134815	8.19424	2.5219e-16	3.84792e-15
AAEL004469	3260.92	0.693083	0.0846884	8.18392	2.7475e-16	4.18717e-15
AAEL006693	4845.63	0.722295	0.0882647	8.18328	2.76219e-16	4.2046e-15
AAEL008769	277699	3.9414	0.482363	8.17103	3.05769e-16	4.64892e-15
AAEL011051	6505.81	-0.613662	0.0751245	-8.1686	3.11985e-16	4.73784e-15
AAEL008632	6188.97	-0.929122	0.113756	-8.16771	3.14301e-16	4.76739e-15
AAEL014414	2781.14	0.748316	0.0916442	8.16546	3.20226e-16	4.85155e-15
AAEL003923	5026.74	1.00645	0.123263	8.16504	3.21324e-16	4.86247e-15
AAEL013320	13008.9	1.41251	0.173275	8.15185	3.58406e-16	5.41727e-15
AAEL009706	13590.1	-1.15306	0.141624	-8.14174	3.89642e-16	5.8825e-15
AAEL008462	2230.74	0.793535	0.0975568	8.13409	4.15047e-16	6.25872e-15
AAEL017368	14063.3	0.993498	0.122306	8.12307	4.54539e-16	6.84623e-15
AAEL005468	905.964	0.773551	0.09527	8.11957	4.67853e-16	7.03853e-15
AAEL027016	10398.5	1.98159	0.244364	8.1092	5.09536e-16	7.65671e-15
AAEL014296	3982.25	-0.757219	0.0934028	-8.10702	5.1875e-16	7.78609e-15
AAEL006238	2497.58	-1.93426	0.238709	-8.10299	5.36243e-16	8.03928e-15
AAEL008248	18461.9	-0.618453	0.0763729	-8.09781	5.59591e-16	8.37957e-15
AAEL014649	865.746	0.930506	0.114969	8.09351	5.79699e-16	8.6706e-15
AAEL017435	1311.17	-0.998735	0.12346	-8.08957	5.9877e-16	8.94548e-15
AAEL013992	1297.81	0.978792	0.121015	8.08817	6.05667e-16	9.03804e-15
AAEL026808	158.632	-2.19206	0.271208	-8.08257	6.34177e-16	9.45254e-15
AAEL003903	6356.99	-1.41908	0.17561	-8.08082	6.43311e-16	9.57761e-15
AAEL003763	2102.99	2.17171	0.269049	8.07179	6.92731e-16	1.03015e-14
AAEL013840	3433.14	1.0912	0.135239	8.06865	7.10787e-16	1.05578e-14
AAEL010768	759.007	1.12659	0.139672	8.06595	7.2667e-16	1.07813e-14
AAEL021010	104.548	2.42334	0.300683	8.05943	7.66488e-16	1.1359e-14
AAEL019742	1101.36	1.39162	0.172709	8.05764	7.77824e-16	1.15138e-14
AAEL009636	4017.65	0.616327	0.0765323	8.05316	8.06854e-16	1.19298e-14
AAEL021679	249.028	1.93845	0.241036	8.04216	8.8272e-16	1.30365e-14
AAEL000568	5174.49	0.710142	0.088346	8.03819	9.11751e-16	1.34499e-14
AAEL007290	3572.56	-0.754387	0.0938771	-8.0359	9.28928e-16	1.36876e-14
AAEL019671	1739	-1.3471	0.167652	-8.03512	9.34888e-16	1.37597e-14
AAEL004212	2490.59	-2.15709	0.268786	-8.02528	1.01295e-15	1.48917e-14
AAEL010778	7724.97	-1.26107	0.157186	-8.02282	1.03344e-15	1.51755e-14
AAEL020013	779.235	-0.987906	0.123147	-8.02217	1.03889e-15	1.52383e-14
AAEL003991	936.531	-1.02507	0.127857	-8.01736	1.08045e-15	1.58299e-14
AAEL001810	2923.88	-0.714894	0.0891852	-8.01583	1.09392e-15	1.60089e-14
AAEL001405	948.841	0.735457	0.0917607	8.01495	1.10185e-15	1.61068e-14
AAEL008495	778.036	1.63704	0.204317	8.01227	1.12609e-15	1.64424e-14
AAEL008206	314.791	13.4096	1.67444	8.0084	1.16209e-15	1.69489e-14
AAEL011082	281.365	-1.89277	0.236403	-8.00657	1.17956e-15	1.71842e-14
AAEL011112	817.674	-2.05462	0.256705	-8.00381	1.20627e-15	1.75535e-14
AAEL001371	1147.07	0.897789	0.112181	8.00306	1.21363e-15	1.76407e-14
AAEL004227	84480.3	0.844354	0.105514	8.00231	1.22103e-15	1.77283e-14
AAEL000747	1875.08	-1.33873	0.167338	-8.00018	1.24234e-15	1.80175e-14
AAEL006236	1617.32	-1.06541	0.133375	-7.98808	1.37055e-15	1.98545e-14
AAEL004437	605.127	-1.39187	0.174291	-7.98593	1.39463e-15	2.01807e-14
AAEL013002	3833.81	0.896247	0.112287	7.98177	1.44251e-15	2.08501e-14
AAEL002010	658.119	2.88323	0.361483	7.97613	1.50987e-15	2.17993e-14
AAEL000175	22641.2	0.531907	0.0668059	7.96197	1.69315e-15	2.44181e-14
AAEL009689	9.79715	-20.4047	2.56389	-7.95847	1.74183e-15	2.50921e-14
AAEL010782	317256	2.08023	0.261557	7.95325	1.81682e-15	2.61432e-14
AAEL009829	2743.55	1.07459	0.135137	7.95185	1.83747e-15	2.64108e-14
AAEL007773	1311.11	-0.890695	0.112075	-7.94728	1.90645e-15	2.73718e-14
AAEL009703	752.647	0.942928	0.11874	7.94111	2.00379e-15	2.87373e-14
AAEL023532	494.989	-3.44801	0.434441	-7.93666	2.07692e-15	2.97531e-14
AAEL021263	2732.45	1.98308	0.249876	7.93626	2.08368e-15	2.98167e-14
AAEL002271	2099.09	0.633673	0.079849	7.93589	2.08984e-15	2.98718e-14
AAEL005218	543.117	-1.39959	0.176459	-7.93157	2.164e-15	3.08975e-14
AAEL010565	4288.01	-0.95152	0.120134	-7.92051	2.36533e-15	3.37347e-14
AAEL004967	990.925	1.99461	0.251991	7.91543	2.46402e-15	3.51035e-14
AAEL008741	2272.09	0.657754	0.0831048	7.91476	2.47736e-15	3.52546e-14
AAEL012238	11610.7	1.23069	0.1556	7.90931	2.58814e-15	3.67904e-14
AAEL009200	1636.31	0.587335	0.074326	7.90215	2.74141e-15	3.89262e-14
AAEL010074	897.507	-1.2686	0.160743	-7.8921	2.97144e-15	4.21461e-14
AAEL002349	5478.43	0.836328	0.106031	7.88755	3.08175e-15	4.36626e-14
AAEL013729	1729.63	-1.01113	0.128209	-7.88659	3.10544e-15	4.395e-14
AAEL013400	1101.39	1.39964	0.17749	7.88571	3.12743e-15	4.42126e-14
AAEL020830	1259.82	-2.02243	0.256606	-7.88148	3.23526e-15	4.5687e-14
AAEL004853	1841.93	-1.10936	0.140782	-7.87999	3.2742e-15	4.61863e-14
AAEL018119	2612.85	0.945645	0.120019	7.87913	3.2966e-15	4.64514e-14
AAEL001883	626.575	0.765043	0.0971465	7.87514	3.40354e-15	4.79059e-14
AAEL006836	707.91	1.08764	0.13817	7.87175	3.49719e-15	4.91201e-14
AAEL021386	4412.79	0.913295	0.116022	7.87174	3.49742e-15	4.91201e-14
AAEL008924	5573.63	-1.06728	0.135689	-7.8656	3.67345e-15	5.15362e-14
AAEL012278	2686.3	1.16866	0.148631	7.86279	3.75657e-15	5.26451e-14
AAEL000647	111045	-1.07382	0.136667	-7.85718	3.92875e-15	5.49982e-14
AAEL026201	226.313	-1.81774	0.23181	-7.84154	4.45046e-15	6.2234e-14
AAEL010243	2314.56	1.57489	0.200905	7.83898	4.54237e-15	6.34504e-14
AAEL005313	611.671	1.01616	0.129714	7.83386	4.73121e-15	6.60167e-14
AAEL013076	6101.25	0.833758	0.106434	7.83359	4.74139e-15	6.60873e-14
AAEL012456	2947.27	-0.966446	0.123399	-7.83189	4.80578e-15	6.69125e-14
AAEL024186	19539.9	-0.810445	0.103492	-7.83102	4.83933e-15	6.73069e-14
AAEL000500	219419	2.92872	0.374038	7.83001	4.87835e-15	6.77765e-14
AAEL001216	12002.4	0.897984	0.114743	7.82605	5.03428e-15	6.98676e-14
AAEL001626	7382.13	1.51177	0.193225	7.82391	5.12083e-15	7.09923e-14
AAEL010015	2442.83	-1.05671	0.135188	-7.81661	5.42634e-15	7.51469e-14
AAEL019458	5044.67	2.11093	0.270175	7.81322	5.57448e-15	7.71156e-14
AAEL008154	12984.6	-0.61752	0.0790782	-7.80898	5.76521e-15	7.96687e-14
AAEL020945	113.961	2.77086	0.355154	7.80187	6.09983e-15	8.42024e-14
AAEL000270	3243.53	0.976508	0.125331	7.79144	6.62514e-15	9.13561e-14
AAEL009420	5552.01	-1.24093	0.15935	-7.78743	6.83839e-15	9.41959e-14
AAEL003777	9588.36	-1.41619	0.181876	-7.78658	6.88472e-15	9.47328e-14
AAEL019804	379.629	-1.63174	0.209654	-7.78304	7.08008e-15	9.73171e-14
AAEL005690	1141.74	0.855099	0.109896	7.78099	7.19592e-15	9.88041e-14
AAEL001350	929.346	0.925348	0.118928	7.78074	7.21031e-15	9.88964e-14
AAEL013900	589.11	-1.95969	0.252065	-7.77456	7.57075e-15	1.0373e-13
AAEL006519	10442.5	0.667263	0.0858691	7.7707	7.80555e-15	1.06833e-13
AAEL015199	1384.82	1.37354	0.176864	7.76609	8.09451e-15	1.10671e-13
AAEL020203	1108.57	-1.06723	0.137449	-7.76458	8.19182e-15	1.11883e-13
AAEL001112	3550.27	0.683338	0.0880103	7.76429	8.21031e-15	1.12016e-13
AAEL013828	1546.2	0.835664	0.107642	7.76335	8.27182e-15	1.12736e-13
AAEL014071	3648.81	0.668168	0.0860707	7.76301	8.29338e-15	1.12911e-13
AAEL011865	5592.09	-1.12975	0.145612	-7.75866	8.58307e-15	1.16732e-13
AAEL027616	2029.32	-0.872721	0.112501	-7.75742	8.66744e-15	1.17755e-13
AAEL001312	2241.89	-1.0058	0.129691	-7.75537	8.80891e-15	1.19551e-13
AAEL012187	2150.49	1.58925	0.204965	7.75376	8.92101e-15	1.20945e-13
AAEL003954	4348.06	-1.84744	0.238347	-7.75105	9.11362e-15	1.23414e-13
AAEL013304	9472.97	2.89301	0.373247	7.75093	9.12228e-15	1.23414e-13
AAEL013872	3842.33	-0.819008	0.105683	-7.74964	9.2152e-15	1.2454e-13
AAEL004356	1136.48	-1.28177	0.165435	-7.74783	9.34732e-15	1.26194e-13
AAEL000146	2323.54	-1.36781	0.176546	-7.74765	9.36122e-15	1.26249e-13
AAEL014913	29595.6	-0.641944	0.0828938	-7.74418	9.62013e-15	1.29605e-13
AAEL012929	1098.44	-1.58188	0.204327	-7.7419	9.79431e-15	1.31814e-13
AAEL004471	5940.65	-0.496225	0.0640986	-7.7416	9.8175e-15	1.31989e-13
AAEL009857	5591.14	-1.07738	0.139188	-7.74051	9.90193e-15	1.32985e-13
AAEL024696	862.944	-2.16595	0.279851	-7.73965	9.96911e-15	1.33748e-13
AAEL023491	126.4	-2.40774	0.31121	-7.73669	1.02041e-14	1.36759e-13
AAEL004308	3500.35	0.943113	0.121922	7.73541	1.03069e-14	1.37992e-13
AAEL008366	1800.58	0.96667	0.125226	7.7194	1.16882e-14	1.56323e-13
AAEL002413	189.885	3.97324	0.515005	7.71496	1.21022e-14	1.61693e-13
AAEL007987	6059.64	0.771133	0.0999655	7.71399	1.21945e-14	1.62757e-13
AAEL014031	3024.85	0.560391	0.0726536	7.71318	1.22717e-14	1.63618e-13
AAEL003326	5646.24	-0.961227	0.124703	-7.7081	1.27706e-14	1.70094e-13
AAEL002757	354.616	2.30762	0.299475	7.70557	1.30256e-14	1.73312e-13
AAEL003524	22372.5	1.78471	0.231661	7.70398	1.31887e-14	1.75301e-13
AAEL024838	2872.64	-1.5409	0.200052	-7.70251	1.33416e-14	1.7715e-13
AAEL024455	776.207	-1.17333	0.152365	-7.70077	1.3525e-14	1.79402e-13
AAEL008561	597.866	1.1642	0.151193	7.7001	1.35959e-14	1.80157e-13
AAEL006071	2336.78	-1.28684	0.167165	-7.698	1.38208e-14	1.82949e-13
AAEL003365	6854.14	1.88031	0.244541	7.68912	1.48146e-14	1.95903e-13
AAEL005471	20054.2	1.11436	0.144951	7.68783	1.49655e-14	1.97695e-13
AAEL019444	1124.78	-2.36586	0.307817	-7.68595	1.51866e-14	2.0041e-13
AAEL003976	5327.22	-0.695912	0.0905777	-7.68304	1.5536e-14	2.04812e-13
AAEL003945	2351.17	0.918868	0.11963	7.68092	1.57949e-14	2.08012e-13
AAEL005605	10205.1	1.53683	0.200097	7.6804	1.58594e-14	2.08436e-13
AAEL024852	1951.59	-0.893371	0.116318	-7.68044	1.58549e-14	2.08436e-13
AAEL004551	1593.08	-1.15458	0.150384	-7.67753	1.62191e-14	2.12946e-13
AAEL008208	821.932	11.4235	1.48847	7.67462	1.65906e-14	2.17602e-13
AAEL010378	5008.57	-0.690132	0.0899609	-7.67147	1.70033e-14	2.22788e-13
AAEL003791	1325.15	1.2119	0.158072	7.66676	1.76401e-14	2.30897e-13
AAEL012925	1531.5	-1.03277	0.134711	-7.66657	1.76658e-14	2.30999e-13
AAEL025656	1633.19	1.42128	0.18548	7.6627	1.82057e-14	2.37818e-13
AAEL007473	4067.12	-1.50488	0.196434	-7.66098	1.84524e-14	2.40797e-13
AAEL009526	5709.52	0.986567	0.128783	7.66066	1.84978e-14	2.41144e-13
AAEL005808	18316.4	-1.15548	0.150903	-7.65708	1.90202e-14	2.47704e-13
AAEL017403	91.326	-18.482	2.41403	-7.65607	1.91706e-14	2.49411e-13
AAEL001843	635.785	-1.92035	0.250901	-7.65384	1.9507e-14	2.53532e-13
AAEL021600	1425.27	1.09786	0.143549	7.64796	2.04201e-14	2.65132e-13
AAEL005216	513.22	-2.18355	0.285552	-7.64677	2.06088e-14	2.67314e-13
AAEL013888	3805.33	0.843303	0.110348	7.64224	2.13474e-14	2.76615e-13
AAEL022327	263.908	-2.37873	0.311404	-7.63871	2.19403e-14	2.84012e-13
AAEL001827	476.666	1.09441	0.143338	7.63515	2.25555e-14	2.91683e-13
AAEL021925	742.391	-2.77744	0.364256	-7.62498	2.44063e-14	3.15301e-13
AAEL007385	228044	1.07416	0.140961	7.62025	2.53186e-14	3.26759e-13
AAEL011810	2759.55	2.61558	0.343813	7.60757	2.79291e-14	3.6009e-13
AAEL021276	6241.74	-1.08775	0.143041	-7.60448	2.86049e-14	3.68067e-13
AAEL012007	8856.23	-1.18604	0.155964	-7.60456	2.85884e-14	3.68067e-13
AAEL027912	195.707	3.34475	0.440083	7.60028	2.95492e-14	3.79838e-13
AAEL010511	1630.23	-1.52362	0.200497	-7.59922	2.97913e-14	3.82569e-13
AAEL011929	8033.54	4.66748	0.614382	7.59703	3.02999e-14	3.88713e-13
AAEL019430	2863.03	1.28664	0.169416	7.59456	3.08835e-14	3.95806e-13
AAEL025046	250.238	-1.65173	0.217621	-7.58993	3.20083e-14	4.09815e-13
AAEL006549	930.712	1.75366	0.231101	7.58827	3.24197e-14	4.14669e-13
AAEL028239	3684.67	1.29675	0.170915	7.58709	3.27173e-14	4.17648e-13
AAEL022966	56.9358	-3.06526	0.404007	-7.58713	3.27058e-14	4.17648e-13
AAEL019577	3106.35	-1.15079	0.151798	-7.58105	3.42758e-14	4.3711e-13
AAEL001307	3162.56	2.06267	0.272157	7.57898	3.4829e-14	4.43725e-13
AAEL021176	2341.98	-0.847875	0.111898	-7.57718	3.53151e-14	4.49475e-13
AAEL005874	5251.08	-1.33853	0.176683	-7.57591	3.56631e-14	4.53456e-13
AAEL012528	2270.62	-1.51828	0.200431	-7.57509	3.58882e-14	4.55868e-13
AAEL012310	11679.1	0.593241	0.0783372	7.57292	3.6494e-14	4.63108e-13
AAEL014361	169.115	1.93409	0.255648	7.56544	3.86566e-14	4.90068e-13
AAEL007636	1994.88	-0.58692	0.0775958	-7.56381	3.9143e-14	4.95747e-13
AAEL003005	1133.67	-1.11416	0.147368	-7.56037	4.01915e-14	5.08527e-13
AAEL003145	609.97	-2.11649	0.28017	-7.55431	4.21096e-14	5.32274e-13
AAEL006571	660.212	0.813049	0.107657	7.55219	4.27989e-14	5.40456e-13
AAEL014250	1486.57	2.28114	0.302065	7.55182	4.29204e-14	5.4146e-13
AAEL017116	27151.4	0.552696	0.0732074	7.54972	4.36185e-14	5.4973e-13
AAEL020789	27739.4	-1.23916	0.164211	-7.54613	4.48366e-14	5.64529e-13
AAEL005152	413.158	0.977281	0.129612	7.54005	4.69794e-14	5.90933e-13
AAEL002115	1235.4	0.653407	0.0866802	7.53813	4.76746e-14	5.99092e-13
AAEL002178	20816.5	-1.09547	0.145365	-7.53601	4.84568e-14	6.08329e-13
AAEL008921	10935.1	0.803744	0.106682	7.534	4.92093e-14	6.17175e-13
AAEL006895	3797	-1.27196	0.168914	-7.53021	5.06582e-14	6.34728e-13
AAEL012656	568.072	1.29605	0.172238	7.52473	5.28296e-14	6.61141e-13
AAEL006715	433.49	-1.37063	0.182153	-7.52463	5.28687e-14	6.61141e-13
AAEL002789	5200.95	0.774004	0.102896	7.5222	5.38601e-14	6.72886e-13
AAEL013167	1084.8	0.828596	0.110159	7.52185	5.40067e-14	6.74064e-13
AAEL025391	12763.4	-0.947256	0.125964	-7.52008	5.47425e-14	6.82587e-13
AAEL007356	1367.9	1.20373	0.160084	7.51934	5.50543e-14	6.85812e-13
AAEL018320	1780.1	-1.50211	0.199787	-7.51858	5.53745e-14	6.89135e-13
AAEL000851	4557.04	-1.55481	0.207119	-7.50688	6.05533e-14	7.52857e-13
AAEL003157	996.495	0.729425	0.0971752	7.50629	6.08274e-14	7.55537e-13
AAEL001159	4940.82	-1.15361	0.153741	-7.50356	6.21054e-14	7.70669e-13
AAEL007120	265.306	-4.40199	0.586756	-7.50224	6.27362e-14	7.77747e-13
AAEL010107	665.303	0.917432	0.122303	7.50133	6.31747e-14	7.82432e-13
AAEL017042	3542.24	-0.82053	0.109501	-7.49333	6.7149e-14	8.30856e-13
AAEL001925	829.728	-1.23544	0.164895	-7.4923	6.76794e-14	8.36616e-13
AAEL006188	263.293	-2.16851	0.289605	-7.4878	7.00355e-14	8.64911e-13
AAEL009882	2221.18	0.945447	0.126302	7.48561	7.1218e-14	8.78673e-13
AAEL000049	3829.58	1.0293	0.137523	7.48453	7.18024e-14	8.85037e-13
AAEL025040	82.5465	4.33633	0.579415	7.48398	7.21051e-14	8.87919e-13
AAEL014375	1124.73	0.79998	0.106916	7.48229	7.30394e-14	8.98566e-13
AAEL017061	23676.4	-1.5541	0.207774	-7.47976	7.44583e-14	9.15148e-13
AAEL005719	1286.65	1.34896	0.180359	7.47933	7.47013e-14	9.17261e-13
AAEL012262	10849.6	0.85596	0.114473	7.47738	7.58163e-14	9.30066e-13
AAEL008530	1088.95	-1.08157	0.144708	-7.47411	7.77265e-14	9.52592e-13
AAEL020200	1148.95	-3.12789	0.418569	-7.47282	7.84957e-14	9.61107e-13
AAEL026349	34.9549	8.82318	1.18137	7.4686	8.10527e-14	9.91473e-13
AAEL026150	344.04	-2.06466	0.276621	-7.46386	8.40253e-14	1.02686e-12
AAEL003415	10783.2	1.30476	0.174822	7.46336	8.43459e-14	1.0298e-12
AAEL004740	277.164	1.78526	0.23935	7.45879	8.73176e-14	1.06508e-12
AAEL019441	303.103	1.58952	0.213249	7.4538	9.06894e-14	1.10516e-12
AAEL006815	6945.82	-1.20856	0.162211	-7.45052	9.29755e-14	1.13195e-12
AAEL007936	4635.49	0.594469	0.0798715	7.44282	9.85606e-14	1.19881e-12
AAEL009772	3916.06	0.659668	0.0886838	7.43842	1.01894e-13	1.23819e-12
AAEL003418	14107.1	1.14726	0.154301	7.43519	1.0442e-13	1.26769e-12
AAEL011745	1192.42	0.934143	0.125658	7.43401	1.05357e-13	1.27786e-12
AAEL012835	7785.8	-1.2441	0.16738	-7.43278	1.06338e-13	1.28855e-12
AAEL025438	589.896	-1.62536	0.218701	-7.43185	1.07087e-13	1.29519e-12
AAEL003229	7542.75	2.0873	0.280856	7.43191	1.07037e-13	1.29519e-12
AAEL009843	18568	1.46428	0.197178	7.42617	1.11784e-13	1.35074e-12
AAEL001235	1521.14	-1.38613	0.186772	-7.4215	1.15798e-13	1.39792e-12
AAEL000857	693.161	-1.23351	0.166243	-7.41991	1.17204e-13	1.41358e-12
AAEL020441	6790.01	2.0014	0.269807	7.41791	1.18981e-13	1.43366e-12
AAEL006677	2355.34	0.713816	0.0962342	7.41749	1.19363e-13	1.43693e-12
AAEL019862	5708.89	2.76073	0.372544	7.41049	1.25837e-13	1.51345e-12
AAEL009524	45.7743	-19.4002	2.61901	-7.40745	1.28747e-13	1.54701e-12
AAEL011191	4226.6	-1.9327	0.261048	-7.40362	1.3252e-13	1.59085e-12
AAEL002638	5916.55	-1.42824	0.192935	-7.40271	1.33434e-13	1.60034e-12
AAEL003829	9383.46	-0.47027	0.063531	-7.40221	1.33938e-13	1.60489e-12
AAEL008319	945.579	1.39046	0.187908	7.39967	1.36524e-13	1.63436e-12
AAEL018276	1189.73	0.852904	0.115426	7.3892	1.47717e-13	1.76671e-12
AAEL019424	9717.68	-1.23696	0.167435	-7.38775	1.49337e-13	1.78443e-12
AAEL004131	2378.3	1.63297	0.221085	7.38614	1.51151e-13	1.80443e-12
AAEL005515	57473.6	0.604882	0.0819586	7.38033	1.57895e-13	1.8832e-12
AAEL012137	471.279	-1.07585	0.145866	-7.37561	1.63594e-13	1.94937e-12
AAEL004513	2391.76	-1.91934	0.260395	-7.37087	1.69521e-13	2.01813e-12
AAEL005477	14648.8	-0.810595	0.110017	-7.36789	1.73344e-13	2.06174e-12
AAEL006247	1836.68	-1.21093	0.164446	-7.36372	1.78852e-13	2.12529e-12
AAEL004930	71160.5	-1.39138	0.189052	-7.35978	1.84209e-13	2.18693e-12
AAEL010834	5925.82	0.865397	0.117628	7.35706	1.88005e-13	2.22902e-12
AAEL010753	308.042	-1.20592	0.163915	-7.35699	1.881e-13	2.22902e-12
AAEL002502	1400.61	0.705875	0.0959548	7.35632	1.89044e-13	2.23815e-12
AAEL006550	5211.44	0.89093	0.121132	7.35502	1.90898e-13	2.25803e-12
AAEL027066	2267.75	-1.13745	0.154656	-7.35474	1.913e-13	2.26071e-12
AAEL003698	2743.48	-1.52852	0.207977	-7.34945	1.9902e-13	2.34979e-12
AAEL011873	6632.74	0.646889	0.088061	7.34592	2.04354e-13	2.41056e-12
AAEL005017	1788.61	-1.00241	0.13654	-7.34151	2.11205e-13	2.48909e-12
AAEL008931	4495.24	-1.26933	0.172973	-7.33833	2.16283e-13	2.54661e-12
AAEL008500	13062.9	0.993241	0.135412	7.33496	2.21794e-13	2.60911e-12
AAEL004057	540.81	1.12902	0.154062	7.32837	2.3297e-13	2.73809e-12
AAEL014531	674.317	0.958469	0.130795	7.32802	2.3357e-13	2.74264e-12
AAEL005080	1733.92	0.728979	0.0995011	7.32634	2.36521e-13	2.77477e-12
AAEL010037	1498.61	-1.56357	0.213441	-7.32556	2.37896e-13	2.78835e-12
AAEL013087	408.695	0.95479	0.130548	7.31371	2.59869e-13	3.04313e-12
AAEL006776	3751.94	-0.811559	0.110981	-7.3126	2.62031e-13	3.06566e-12
AAEL002645	6443.28	0.6031	0.0824824	7.31185	2.6348e-13	3.07982e-12
AAEL001674	127999	4.49719	0.615352	7.30833	2.70479e-13	3.15877e-12
AAEL000605	1182.69	1.16048	0.158823	7.30674	2.73697e-13	3.19346e-12
AAEL010340	10050.8	0.697707	0.0955752	7.30008	2.87596e-13	3.3526e-12
AAEL008827	576.046	-1.63274	0.223669	-7.29981	2.88177e-13	3.35633e-12
AAEL013628	49371.5	-1.10599	0.151825	-7.28462	3.22582e-13	3.75366e-12
AAEL011967	3604.05	-1.08714	0.149305	-7.28139	3.30398e-13	3.84114e-12
AAEL004523	32441.2	1.39108	0.191276	7.27263	3.52563e-13	4.09513e-12
AAEL004283	330.773	-1.7956	0.246997	-7.26969	3.60313e-13	4.18139e-12
AAEL005175	4575.47	-1.44409	0.198683	-7.26831	3.64026e-13	4.21411e-12
AAEL020689	3049.85	0.813769	0.11196	7.26838	3.63831e-13	4.21411e-12
AAEL001709	2329.53	0.767157	0.105549	7.26827	3.64114e-13	4.21411e-12
AAEL025877	1102.32	1.28097	0.176322	7.26494	3.73193e-13	4.31531e-12
AAEL010434	6202.85	8.17811	1.12623	7.26153	3.82745e-13	4.42181e-12
AAEL017345	319.185	2.23768	0.308169	7.26119	3.83694e-13	4.4288e-12
AAEL005848	691.127	0.740719	0.102083	7.25606	3.98529e-13	4.59592e-12
AAEL009926	1198.69	0.681311	0.0939206	7.25412	4.04294e-13	4.65407e-12
AAEL003076	12064	1.44412	0.199073	7.25421	4.0401e-13	4.65407e-12
AAEL019848	49.7257	4.2738	0.589173	7.25391	4.04917e-13	4.65708e-12
AAEL026731	286.279	-2.33114	0.321378	-7.25358	4.05907e-13	4.66431e-12
AAEL001029	780.538	1.27144	0.17531	7.25254	4.09034e-13	4.69606e-12
AAEL000128	14196	1.08128	0.149106	7.25178	4.11333e-13	4.71826e-12
AAEL023332	13276.2	1.43333	0.197717	7.24942	4.18565e-13	4.79694e-12
AAEL013965	409.087	1.3538	0.186764	7.24869	4.20813e-13	4.81842e-12
AAEL000983	1916.04	0.722207	0.09964	7.24816	4.22465e-13	4.83305e-12
AAEL003034	701.745	0.854422	0.117997	7.24104	4.45246e-13	5.08915e-12
AAEL000905	9503.25	-1.39027	0.192121	-7.23643	4.60654e-13	5.2606e-12
AAEL004592	390.824	2.53772	0.350823	7.23361	4.70329e-13	5.36633e-12
AAEL000240	1545.92	0.682665	0.0944003	7.2316	4.77343e-13	5.44154e-12
AAEL005190	1514.05	1.57708	0.218098	7.23109	4.79146e-13	5.45727e-12
AAEL008718	1145.77	0.686839	0.0951826	7.21602	5.35329e-13	6.09179e-12
AAEL001204	7757.75	-1.21929	0.168988	-7.21524	5.38373e-13	6.12103e-12
AAEL003384	301.601	1.39244	0.193063	7.21235	5.49948e-13	6.24712e-12
AAEL003774	1987.42	0.744616	0.10329	7.20896	5.63789e-13	6.3987e-12
AAEL005896	568.978	-1.36077	0.188825	-7.20655	5.73887e-13	6.50759e-12
AAEL012208	2112.79	-0.875554	0.121533	-7.20422	5.8377e-13	6.61384e-12
AAEL007306	5767.79	-0.68261	0.0947611	-7.20349	5.86909e-13	6.64356e-12
AAEL003130	7144.18	0.50301	0.069837	7.20263	5.9062e-13	6.67971e-12
AAEL000649	387.282	-1.8274	0.253831	-7.19926	6.05412e-13	6.84099e-12
AAEL003874	608.154	1.08117	0.150253	7.19568	6.215e-13	7.01663e-12
AAEL019555	5231.84	0.804214	0.111783	7.19443	6.27201e-13	7.0748e-12
AAEL009099	1330.58	-0.934827	0.130031	-7.18929	6.51294e-13	7.34015e-12
AAEL000441	185.433	-2.52162	0.350794	-7.18831	6.55978e-13	7.38649e-12
AAEL002683	13738.2	1.23317	0.171654	7.18408	6.76625e-13	7.61233e-12
AAEL011650	6616.72	0.812419	0.113137	7.18084	6.9285e-13	7.78807e-12
AAEL005003	498.812	-1.3547	0.188696	-7.17926	7.00903e-13	7.87172e-12
AAEL027018	408.974	1.0884	0.151673	7.17597	7.17969e-13	8.05637e-12
AAEL001277	5646.49	1.18022	0.164511	7.17411	7.27766e-13	8.1592e-12
AAEL010704	5362.7	0.484857	0.0676352	7.16871	7.57094e-13	8.48064e-12
AAEL008854	11526	-0.65134	0.0909236	-7.16359	7.85904e-13	8.79572e-12
AAEL027111	1260.98	-0.81458	0.113744	-7.16151	7.97923e-13	8.92248e-12
AAEL007026	1602.35	0.641597	0.0895986	7.16079	8.0213e-13	8.96175e-12
AAEL021440	5409.18	-1.36717	0.190959	-7.15947	8.09875e-13	9.04045e-12
AAEL023595	5585.69	1.36909	0.191323	7.15592	8.31106e-13	9.26942e-12
AAEL019628	910.939	-2.25966	0.315975	-7.15139	8.59005e-13	9.57231e-12
AAEL000291	273982	0.946611	0.132379	7.15074	8.63099e-13	9.60962e-12
AAEL022977	1311.05	-1.28993	0.18055	-7.14446	9.03529e-13	1.00511e-11
AAEL012930	4702.95	0.540867	0.0757087	7.14405	9.06199e-13	1.00721e-11
AAEL021190	1197.3	1.28625	0.180084	7.14246	9.16735e-13	1.01804e-11
AAEL024022	921.627	-1.30176	0.182533	-7.13166	9.91671e-13	1.10031e-11
AAEL019460	8183.51	-0.700401	0.0982438	-7.12922	1.0094e-12	1.11902e-11
AAEL006485	18.8233	-15.5502	2.1834	-7.12201	1.06362e-12	1.17812e-11
AAEL013825	1667.78	0.759236	0.106628	7.1204	1.07612e-12	1.19094e-11
AAEL013731	3452.62	0.868857	0.122189	7.11074	1.15426e-12	1.27632e-11
AAEL007763	2466.05	0.909346	0.127948	7.10716	1.18453e-12	1.30867e-11
AAEL001838	1949.96	0.91295	0.128493	7.10505	1.2028e-12	1.32771e-11
AAEL004910	833.186	-0.925963	0.130345	-7.10396	1.21232e-12	1.33708e-11
AAEL014749	4514.35	1.11152	0.156511	7.10182	1.23127e-12	1.35682e-11
AAEL000485	7614.66	0.55493	0.0781578	7.10012	1.24645e-12	1.37237e-11
AAEL011748	784.465	1.45203	0.204527	7.09943	1.25273e-12	1.37811e-11
AAEL011538	578.801	1.27607	0.180077	7.08625	1.378e-12	1.51462e-11
AAEL014709	5153.93	1.23498	0.174554	7.07506	1.49385e-12	1.64057e-11
AAEL028088	1715.29	-1.71255	0.242063	-7.07481	1.4965e-12	1.64208e-11
AAEL010931	663.97	-0.963401	0.136244	-7.07116	1.53639e-12	1.68441e-11
AAEL013987	15086.3	1.41758	0.200482	7.07085	1.53984e-12	1.68676e-11
AAEL011329	2659.43	0.737939	0.104366	7.07071	1.54144e-12	1.68708e-11
AAEL012093	8323.22	-0.667655	0.0945049	-7.06476	1.60891e-12	1.75943e-11
AAEL013347	472.71	2.50013	0.354041	7.06169	1.6449e-12	1.79726e-11
AAEL011055	4449.96	-0.714703	0.101231	-7.06012	1.66359e-12	1.81614e-11
AAEL002860	4219.98	-1.21673	0.172364	-7.05908	1.67609e-12	1.82824e-11
AAEL002183	3688.74	0.865118	0.122559	7.05878	1.67966e-12	1.82905e-11
AAEL003713	4259.81	-1.08977	0.154382	-7.05888	1.67851e-12	1.82905e-11
AAEL006886	1587.03	-2.13447	0.302391	-7.05864	1.68146e-12	1.82945e-11
AAEL010057	2845.2	0.838287	0.118773	7.05789	1.69046e-12	1.8377e-11
AAEL014915	3152.61	0.753024	0.106713	7.05651	1.70739e-12	1.85454e-11
AAEL025151	6019.34	0.77937	0.110522	7.05173	1.76707e-12	1.91774e-11
AAEL014280	157.58	-2.03701	0.289107	-7.04586	1.84323e-12	1.99872e-11
AAEL014098	460.52	-1.15425	0.163929	-7.04119	1.90602e-12	2.06506e-11
AAEL024341	553.933	-1.34823	0.191493	-7.04061	1.91403e-12	2.072e-11
AAEL004567	7900.66	-0.700577	0.0995205	-7.03952	1.92905e-12	2.08476e-11
AAEL002255	137.166	4.49595	0.638669	7.03957	1.9284e-12	2.08476e-11
AAEL007653	1132.04	-4.18013	0.593826	-7.03932	1.93176e-12	2.08594e-11
AAEL000902	24569.9	2.14373	0.304659	7.03648	1.97156e-12	2.12714e-11
AAEL015236	1016.11	1.12556	0.160014	7.03411	2.00531e-12	2.16174e-11
AAEL001900	3531.57	-1.75824	0.249984	-7.03341	2.01552e-12	2.17094e-11
AAEL026994	422.764	-1.86082	0.264808	-7.02705	2.10941e-12	2.27017e-11
AAEL017512	18229.6	-0.833148	0.118576	-7.02629	2.12095e-12	2.28069e-11
AAEL023547	3841.09	-1.2203	0.173713	-7.02482	2.14348e-12	2.30299e-11
AAEL008528	2472.32	-0.8092	0.115279	-7.01951	2.22643e-12	2.39012e-11
AAEL007202	2299.6	0.957667	0.136432	7.01938	2.22855e-12	2.39041e-11
AAEL001321	1880.74	-0.673339	0.0959845	-7.01508	2.29816e-12	2.46302e-11
AAEL000383	646.209	0.958738	0.136695	7.01368	2.32136e-12	2.48582e-11
AAEL024539	2583.91	-1.58849	0.226551	-7.01159	2.35622e-12	2.52105e-11
AAEL014510	1178.75	2.48586	0.35464	7.00951	2.39155e-12	2.55673e-11
AAEL011553	526.429	-2.77436	0.396158	-7.00318	2.5022e-12	2.67281e-11
AAEL019593	563.795	1.11029	0.15864	6.99878	2.58199e-12	2.75577e-11
AAEL007462	873.954	0.841908	0.120351	6.99545	2.64418e-12	2.8198e-11
AAEL001039	875.503	1.52642	0.218309	6.99201	2.70972e-12	2.8873e-11
AAEL012391	154.162	-2.13268	0.305095	-6.99021	2.74481e-12	2.92228e-11
AAEL010798	5650.33	0.626372	0.0896348	6.98805	2.7874e-12	2.96518e-11
AAEL011636	284.129	-1.48934	0.213343	-6.98097	2.93157e-12	3.11597e-11
AAEL000982	796.019	0.798794	0.114435	6.98034	2.94476e-12	3.12742e-11
AAEL004183	2119.11	0.856656	0.122955	6.96723	3.23242e-12	3.43009e-11
AAEL011389	952.936	0.939114	0.134837	6.96479	3.28889e-12	3.48428e-11
AAEL019895	7586.56	-0.847567	0.121692	-6.96485	3.28761e-12	3.48428e-11
AAEL012507	2842.4	0.692971	0.0995151	6.96347	3.31988e-12	3.51422e-11
AAEL022051	4325	0.872805	0.125359	6.96245	3.34402e-12	3.53687e-11
AAEL005038	6469.66	-0.559041	0.0803214	-6.96005	3.40143e-12	3.59464e-11
AAEL022600	156648	2.4671	0.35453	6.95879	3.43204e-12	3.62258e-11
AAEL019580	2209.05	-1.26747	0.182141	-6.95873	3.43348e-12	3.62258e-11
AAEL005803	146.128	2.04008	0.293387	6.95354	3.56237e-12	3.75549e-11
AAEL004818	2862.9	1.39837	0.201135	6.95239	3.5914e-12	3.783e-11
AAEL006299	1031.33	0.587551	0.0845123	6.95225	3.59499e-12	3.78369e-11
AAEL013353	31345	0.753388	0.108378	6.95148	3.61463e-12	3.80126e-11
AAEL017164	1963.02	0.60457	0.0869803	6.95065	3.63599e-12	3.8206e-11
AAEL006501	326.91	-1.16431	0.167564	-6.94842	3.69407e-12	3.87848e-11
AAEL016982	3394.82	0.479611	0.0690413	6.94673	3.73845e-12	3.92188e-11
AAEL001569	5431.47	0.521694	0.075123	6.94454	3.79698e-12	3.98004e-11
AAEL008671	3650.43	0.78217	0.112656	6.94299	3.83888e-12	4.02069e-11
AAEL006872	12168.4	0.769698	0.110878	6.94186	3.86962e-12	4.04959e-11
AAEL003431	4925.01	0.770893	0.111069	6.94066	3.90262e-12	4.08082e-11
AAEL005174	11851.7	-0.97979	0.141176	-6.94019	3.91566e-12	4.09113e-11
AAEL009817	436.804	-1.19919	0.172959	-6.93335	4.10982e-12	4.29052e-11
AAEL011972	6740.78	0.545604	0.0787058	6.9322	4.14345e-12	4.32212e-11
AAEL024527	234.154	-1.39426	0.201147	-6.93155	4.16252e-12	4.33851e-11
AAEL001389	5335.44	-0.688181	0.0993091	-6.92968	4.21784e-12	4.38907e-11
AAEL014345	8696.99	0.755256	0.108989	6.92969	4.21766e-12	4.38907e-11
AAEL013139	26994.9	0.569977	0.0822541	6.92947	4.22423e-12	4.39217e-11
AAEL000412	1971.42	1.62131	0.234174	6.9235	4.40613e-12	4.57762e-11
AAEL007747	238.502	1.08399	0.156608	6.92165	4.46418e-12	4.63419e-11
AAEL008468	1304.85	1.73246	0.250357	6.91995	4.51787e-12	4.68616e-11
AAEL009863	13883.6	0.803454	0.116239	6.91207	4.77635e-12	4.95028e-11
AAEL010336	634.108	1.51845	0.219929	6.90428	5.04582e-12	5.22536e-11
AAEL003619	1323.24	2.46386	0.357024	6.9011	5.16e-12	5.33932e-11
AAEL011340	3931.44	0.671989	0.0974019	6.89913	5.23208e-12	5.40956e-11
AAEL010698	7974.22	1.18763	0.172156	6.89853	5.2543e-12	5.42818e-11
AAEL002432	1543.29	1.87558	0.271929	6.89732	5.29941e-12	5.4704e-11
AAEL004064	605.294	1.09514	0.15881	6.89593	5.35125e-12	5.51949e-11
AAEL003858	1111.82	0.874925	0.126975	6.89054	5.55829e-12	5.72846e-11
AAEL019670	902.253	0.737138	0.106983	6.89024	5.56991e-12	5.73585e-11
AAEL000208	4791.03	0.817012	0.118644	6.88623	5.72911e-12	5.89508e-11
AAEL012830	1309.63	0.711254	0.103336	6.8829	5.86444e-12	6.02952e-11
AAEL025133	368.772	-1.65977	0.241155	-6.88259	5.87749e-12	6.03813e-11
AAEL001615	753.972	1.05987	0.154028	6.88104	5.94188e-12	6.09942e-11
AAEL005536	78568	-0.509545	0.074053	-6.88082	5.95094e-12	6.10385e-11
AAEL020151	569.173	-1.31603	0.191322	-6.8786	6.0445e-12	6.19489e-11
AAEL027483	2184.53	1.10746	0.161024	6.87761	6.08668e-12	6.23316e-11
AAEL007806	60.0608	6.07726	0.884764	6.8688	6.47458e-12	6.62514e-11
AAEL013967	2059.05	0.959643	0.139745	6.86712	6.551e-12	6.69802e-11
AAEL000179	3877.89	0.702143	0.102267	6.8658	6.61214e-12	6.75517e-11
AAEL002184	7015.11	0.644534	0.0939042	6.86374	6.70803e-12	6.84771e-11
AAEL010797	703.995	0.893509	0.130183	6.86347	6.72095e-12	6.85547e-11
AAEL003083	1076.76	-1.13945	0.166065	-6.86145	6.8163e-12	6.94724e-11
AAEL026751	22145.3	-1.442	0.210202	-6.86006	6.88323e-12	7.00991e-11
AAEL005259	1879.53	-0.920266	0.134185	-6.85818	6.97431e-12	7.09706e-11
AAEL006048	1833.07	1.07285	0.156442	6.85779	6.99339e-12	7.11086e-11
AAEL002107	10628.6	1.64242	0.239599	6.85485	7.1387e-12	7.2529e-11
AAEL003298	76124.7	-1.20066	0.175206	-6.85285	7.23929e-12	7.3493e-11
AAEL001540	3242.54	-0.801044	0.116904	-6.85214	7.27553e-12	7.38028e-11
AAEL011719	648.872	1.16279	0.16974	6.85043	7.36277e-12	7.46291e-11
AAEL019422	1676.72	-1.61924	0.236558	-6.845	7.6474e-12	7.74532e-11
AAEL013092	5083.79	-0.850346	0.124244	-6.84417	7.69195e-12	7.78433e-11
AAEL013384	745.992	-1.52026	0.222141	-6.84366	7.71925e-12	7.80582e-11
AAEL013335	627.501	-1.14168	0.166979	-6.83724	8.07345e-12	8.1576e-11
AAEL001808	595.599	-1.67382	0.24487	-6.83552	8.17084e-12	8.24955e-11
AAEL020846	6173.63	-1.65758	0.242597	-6.83264	8.33632e-12	8.41003e-11
AAEL001940	917.565	-1.66807	0.244151	-6.83212	8.36706e-12	8.43444e-11
AAEL021510	35.8885	-4.03813	0.591327	-6.82892	8.55536e-12	8.61752e-11
AAEL015300	925.841	0.843427	0.123662	6.82039	9.0791e-12	9.13793e-11
AAEL008049	119.571	-3.18223	0.467179	-6.8116	9.65188e-12	9.70684e-11
AAEL003363	779.834	1.40077	0.205731	6.80873	9.84627e-12	9.89462e-11
AAEL008723	24957.5	0.961395	0.141211	6.8082	9.88288e-12	9.92368e-11
AAEL000804	602.122	1.32751	0.195068	6.80533	1.00816e-11	1.01154e-10
AAEL020432	311.749	1.72594	0.253633	6.80485	1.01154e-11	1.01414e-10
AAEL021400	1515.45	0.585837	0.0861006	6.8041	1.0168e-11	1.01862e-10
AAEL008789	1322.5	-1.04234	0.153206	-6.80349	1.02112e-11	1.02215e-10
AAEL013309	8359.73	-0.949926	0.13992	-6.78905	1.12875e-11	1.12902e-10
AAEL026227	2893.01	-1.13536	0.167269	-6.78762	1.13997e-11	1.13936e-10
AAEL007680	176.294	-2.25117	0.332053	-6.77953	1.20569e-11	1.2041e-10
AAEL004113	519.788	0.890218	0.131457	6.77196	1.27053e-11	1.2669e-10
AAEL011663	6633.51	0.97359	0.143767	6.772	1.27013e-11	1.2669e-10
AAEL008185	2313.91	1.23473	0.182389	6.76975	1.29004e-11	1.28535e-10
AAEL001846	105.48	4.05239	0.59863	6.76943	1.29289e-11	1.2872e-10
AAEL007243	1206.78	-1.02852	0.152018	-6.7658	1.32575e-11	1.31889e-10
AAEL025976	1635	-1.1207	0.165714	-6.76287	1.35285e-11	1.34482e-10
AAEL018270	3345.33	-0.840984	0.124456	-6.75726	1.40628e-11	1.39685e-10
AAEL005599	85.2845	-2.48439	0.367687	-6.75682	1.41057e-11	1.40004e-10
AAEL001176	16841.8	-1.49599	0.221523	-6.75319	1.44626e-11	1.43436e-10
AAEL011171	1319.41	1.00711	0.149144	6.75264	1.45183e-11	1.43878e-10
AAEL010314	2233.7	-1.51819	0.22495	-6.74902	1.48844e-11	1.47392e-10
AAEL013119	3226.14	0.841055	0.124643	6.74773	1.5018e-11	1.48601e-10
AAEL020983	500.935	2.48808	0.36879	6.74659	1.51358e-11	1.49652e-10
AAEL006713	1692.48	1.28099	0.189953	6.74371	1.54393e-11	1.52536e-10
AAEL003438	1457.54	-1.10976	0.164576	-6.74315	1.54986e-11	1.53004e-10
AAEL009596	10346.6	3.3569	0.498213	6.73788	1.60709e-11	1.58533e-10
AAEL000886	6.79354	20.5361	3.04818	6.73719	1.61481e-11	1.59173e-10
AAEL001220	2856.93	-1.00506	0.149189	-6.73679	1.61922e-11	1.59485e-10
AAEL008686	3838.95	-1.00683	0.1495	-6.73463	1.64342e-11	1.61745e-10
AAEL011088	8155.99	1.50543	0.223556	6.73401	1.65049e-11	1.62317e-10
AAEL009806	2963.05	-1.29864	0.192872	-6.73318	1.65991e-11	1.63119e-10
AAEL013484	5780.96	-2.26183	0.335975	-6.73215	1.67176e-11	1.64159e-10
AAEL001545	350.024	-1.37394	0.204282	-6.72571	1.74736e-11	1.71451e-10
AAEL012751	3534.27	-0.749351	0.11144	-6.72427	1.76472e-11	1.73023e-10
AAEL022397	600.544	-1.40349	0.208766	-6.72281	1.78256e-11	1.7464e-10
AAEL005364	6388.63	-0.782417	0.11645	-6.71892	1.8308e-11	1.7923e-10
AAEL024720	5233.13	-0.684358	0.101933	-6.71378	1.89643e-11	1.85513e-10
AAEL005191	736.714	1.22467	0.1825	6.71052	1.93936e-11	1.89569e-10
AAEL005910	3072.77	1.12789	0.168239	6.7041	2.02654e-11	1.97941e-10
AAEL011985	6868.35	-0.917693	0.136958	-6.70052	2.0768e-11	2.02543e-10
AAEL004228	5512.98	0.895973	0.133715	6.70062	2.07543e-11	2.02543e-10
AAEL013205	1793.48	0.788946	0.117763	6.69946	2.09195e-11	2.03866e-10
AAEL014735	346.176	-1.19778	0.178873	-6.69626	2.13823e-11	2.08219e-10
AAEL022282	8583.22	0.837845	0.125169	6.6937	2.17598e-11	2.11735e-10
AAEL007651	4320.75	-0.52721	0.0787657	-6.6934	2.18042e-11	2.12007e-10
AAEL013675	12782.2	0.741085	0.110792	6.68897	2.24752e-11	2.18366e-10
AAEL021746	5079.54	-0.557147	0.0833097	-6.68766	2.26767e-11	2.20159e-10
AAEL028129	284.092	1.22329	0.183161	6.67876	2.40971e-11	2.33773e-10
AAEL013966	10021.7	-0.927073	0.13885	-6.67681	2.44192e-11	2.36719e-10
AAEL006823	12546.7	1.30931	0.196112	6.67634	2.44991e-11	2.37316e-10
AAEL023604	526.442	-1.18841	0.178013	-6.67598	2.45586e-11	2.37713e-10
AAEL020614	2966.82	-1.02474	0.153522	-6.67491	2.4739e-11	2.3928e-10
AAEL001501	3303.38	0.652243	0.0978079	6.66861	2.58235e-11	2.49582e-10
AAEL007469	772.471	0.971562	0.14574	6.66641	2.62145e-11	2.53171e-10
AAEL009155	5935.01	0.855355	0.128327	6.66541	2.63927e-11	2.54701e-10
AAEL022372	217.246	1.40094	0.210433	6.65741	2.78694e-11	2.68751e-10
AAEL003461	948.336	-0.703465	0.105691	-6.65588	2.81604e-11	2.71354e-10
AAEL009589	263.08	1.37478	0.20658	6.65495	2.83395e-11	2.72876e-10
AAEL013233	6273.51	-0.412315	0.0619593	-6.65461	2.84051e-11	2.73304e-10
AAEL008862	9170.64	0.851909	0.128067	6.65204	2.89058e-11	2.77914e-10
AAEL014720	2235.12	0.695107	0.104569	6.64737	2.98369e-11	2.86652e-10
AAEL019485	2890.91	-1.31645	0.198101	-6.64537	3.02454e-11	2.9036e-10
AAEL007077	1383.36	1.29078	0.194269	6.64429	3.04692e-11	2.92291e-10
AAEL004449	535.525	0.740132	0.111435	6.64182	3.0984e-11	2.97009e-10
AAEL018150	2115.13	-2.752	0.414674	-6.63653	3.2115e-11	3.07522e-10
AAEL001541	1551.25	0.595457	0.0897249	6.63647	3.21285e-11	3.07522e-10
AAEL003273	611.829	1.26358	0.190424	6.6356	3.23195e-11	3.09121e-10
AAEL010796	634.572	0.9778	0.14736	6.63547	3.23478e-11	3.09162e-10
AAEL021837	386.506	1.09932	0.165758	6.63205	3.31047e-11	3.16162e-10
AAEL013279	16303	0.802791	0.121111	6.62853	3.3904e-11	3.23556e-10
AAEL011050	1628.48	-0.704585	0.106323	-6.62682	3.43e-11	3.27094e-10
AAEL008623	221.014	-1.45516	0.219878	-6.61803	3.64007e-11	3.46869e-10
AAEL022806	4766.61	-0.781868	0.118205	-6.61453	3.72733e-11	3.54922e-10
AAEL011708	25459.7	1.67422	0.253127	6.61416	3.73673e-11	3.55555e-10
AAEL003963	2096.46	-1.24824	0.188816	-6.61091	3.81962e-11	3.63174e-10
AAEL008425	4496.33	0.781673	0.118272	6.60912	3.86614e-11	3.67326e-10
AAEL008601	3764.24	0.841328	0.12733	6.60745	3.91e-11	3.71219e-10
AAEL004974	653.561	2.06522	0.312829	6.60176	4.06309e-11	3.85471e-10
AAEL002358	2715.79	-0.93152	0.141145	-6.59973	4.11918e-11	3.90504e-10
AAEL003935	517.353	1.37835	0.20895	6.59657	4.20774e-11	3.98607e-10
AAEL019674	311.65	-1.67995	0.254727	-6.59509	4.24988e-11	4.02303e-10
AAEL027514	1154.71	-2.08682	0.3165	-6.59344	4.29761e-11	4.06523e-10
AAEL006087	2711.35	0.740145	0.112264	6.59288	4.31364e-11	4.07629e-10
AAEL005086	318.758	-1.31935	0.200119	-6.59282	4.31563e-11	4.07629e-10
AAEL020502	268.578	-1.72643	0.26208	-6.58744	4.47467e-11	4.22342e-10
AAEL028237	1876.58	-1.62313	0.246523	-6.58409	4.57687e-11	4.31672e-10
AAEL010403	10998	1.05469	0.160235	6.58216	4.6366e-11	4.36986e-10
AAEL021491	3493.24	-1.29179	0.196324	-6.57992	4.70711e-11	4.43308e-10
AAEL013875	56298.7	0.84807	0.128956	6.57643	4.81868e-11	4.53483e-10
AAEL008961	1513.74	-0.83434	0.12688	-6.57583	4.83814e-11	4.54983e-10
AAEL008428	21393	-1.23181	0.187353	-6.5748	4.87194e-11	4.57828e-10
AAEL026039	225.089	-2.42151	0.368315	-6.57456	4.87979e-11	4.58231e-10
AAEL012739	1333.77	-0.777068	0.118206	-6.57387	4.90243e-11	4.60022e-10
AAEL013982	4916.76	0.954759	0.14524	6.57367	4.90913e-11	4.60316e-10
AAEL006832	358.472	-1.62136	0.246654	-6.57343	4.91704e-11	4.60722e-10
AAEL011754	710.927	0.78079	0.118836	6.57031	5.02108e-11	4.70129e-10
AAEL010032	18635.8	1.0443	0.159042	6.56619	5.16177e-11	4.82951e-10
AAEL008562	4098.9	0.401432	0.0611373	6.56606	5.16629e-11	4.83024e-10
AAEL008144	1290.71	-1.57301	0.239589	-6.56545	5.18743e-11	4.84298e-10
AAEL003536	2501.18	0.723008	0.110122	6.5655	5.18586e-11	4.84298e-10
AAEL006239	1390.43	1.58651	0.241689	6.56429	5.22799e-11	4.87732e-10
AAEL021196	237.576	-2.41385	0.367981	-6.5597	5.39158e-11	5.0263e-10
AAEL018280	2699.4	-0.861798	0.131395	-6.55886	5.42218e-11	5.05117e-10
AAEL013679	1699.48	1.04534	0.159412	6.5575	5.47191e-11	5.09381e-10
AAEL022285	342034	-1.13707	0.173452	-6.55551	5.54525e-11	5.15836e-10
AAEL001647	1423.7	-1.46956	0.224217	-6.5542	5.59393e-11	5.1999e-10
AAEL028185	1947.71	-0.865775	0.132142	-6.55184	5.68306e-11	5.27894e-10
AAEL010254	698.246	1.16764	0.178268	6.54991	5.75713e-11	5.34389e-10
AAEL015065	24025.9	-0.724294	0.110631	-6.54693	5.87324e-11	5.44775e-10
AAEL000077	4439.98	0.675914	0.103247	6.54659	5.88648e-11	5.4561e-10
AAEL012265	2784.18	2.28997	0.349824	6.54607	5.90706e-11	5.46784e-10
AAEL018109	133.597	2.92642	0.447051	6.54606	5.90762e-11	5.46784e-10
AAEL008902	8652.84	1.64947	0.252024	6.54486	5.95509e-11	5.50782e-10
AAEL000193	1461.67	-0.863373	0.131931	-6.54415	5.98367e-11	5.53028e-10
AAEL021923	2613.11	0.902807	0.137973	6.54335	6.01545e-11	5.55567e-10
AAEL025895	311.968	1.90206	0.290911	6.5383	6.22207e-11	5.74239e-10
AAEL024358	3156.73	0.800285	0.122443	6.53597	6.31983e-11	5.82844e-10
AAEL007476	2814.75	-0.644826	0.0987166	-6.53209	6.48574e-11	5.97717e-10
AAEL026787	3231.13	-1.23553	0.189162	-6.5316	6.50725e-11	5.99271e-10
AAEL008347	3487.15	-1.15029	0.176168	-6.52952	6.59796e-11	6.07191e-10
AAEL006799	794.652	0.926058	0.141914	6.52549	6.77803e-11	6.23317e-10
AAEL019468	188.497	-4.24212	0.650431	-6.52202	6.93689e-11	6.37472e-10
AAEL012413	1166.85	0.725019	0.111218	6.51891	7.08194e-11	6.50338e-10
AAEL000875	906.495	0.807403	0.124004	6.51113	7.45894e-11	6.84471e-10
AAEL006654	556.702	1.06514	0.163713	6.50611	7.71194e-11	7.07184e-10
AAEL007731	5804.49	-0.881299	0.135466	-6.50568	7.73451e-11	7.08749e-10
AAEL027459	1276.58	-1.04874	0.161236	-6.50438	7.8013e-11	7.14362e-10
AAEL023511	1485.31	1.46018	0.2245	6.50414	7.81389e-11	7.15007e-10
AAEL012515	2758.46	0.505132	0.0776676	6.50377	7.83333e-11	7.16278e-10
AAEL022375	138.019	-1.66737	0.256586	-6.49827	8.12512e-11	7.42432e-10
AAEL012318	91.8056	4.10735	0.632642	6.49238	8.44927e-11	7.71504e-10
AAEL008080	8323.15	-1.08973	0.167865	-6.49171	8.48663e-11	7.74367e-10
AAEL006285	594.231	-1.26201	0.194434	-6.49068	8.54524e-11	7.79164e-10
AAEL007441	17437.6	0.86295	0.132963	6.49014	8.5758e-11	7.81398e-10
AAEL001192	92.7441	-2.00225	0.308525	-6.48977	8.59699e-11	7.82775e-10
AAEL003528	1484.34	0.522262	0.0804947	6.48816	8.68923e-11	7.90616e-10
AAEL009951	2154.66	-1.53257	0.236227	-6.48771	8.71513e-11	7.92413e-10
AAEL003141	122.266	1.95265	0.301014	6.48692	8.76068e-11	7.95993e-10
AAEL012884	335.481	-1.4842	0.228817	-6.4864	8.79116e-11	7.982e-10
AAEL001715	15649.9	0.905158	0.139608	6.48359	8.95665e-11	8.12654e-10
AAEL022654	75.176	1.82376	0.281655	6.47516	9.47085e-11	8.58703e-10
AAEL009208	1551.79	-1.16867	0.180488	-6.47505	9.47774e-11	8.58725e-10
AAEL009320	10416.8	1.22244	0.188986	6.4684	9.90428e-11	8.96741e-10
AAEL011701	831.102	1.09971	0.170046	6.46712	9.98869e-11	9.03749e-10
AAEL006441	3650.54	0.768879	0.118922	6.46541	1.01025e-10	9.13409e-10
AAEL003842	933.041	-1.99434	0.308525	-6.46412	1.0189e-10	9.20577e-10
AAEL003493	2682.11	0.631701	0.0977448	6.46276	1.0281e-10	9.28244e-10
AAEL010483	3563.05	0.807121	0.124903	6.462	1.03329e-10	9.32273e-10
AAEL019445	1349.74	-1.13394	0.175523	-6.46035	1.04464e-10	9.4186e-10
AAEL012510	5328.02	0.69564	0.107696	6.45931	1.05181e-10	9.47657e-10
AAEL008770	4214.86	0.736738	0.114095	6.45722	1.06642e-10	9.6015e-10
AAEL006338	76.456	2.29446	0.355513	6.45395	1.08971e-10	9.80433e-10
AAEL006035	707.161	-1.44097	0.223317	-6.45259	1.09952e-10	9.88573e-10
AAEL018226	985.76	-0.750051	0.11627	-6.45092	1.1117e-10	9.98828e-10
AAEL022867	5227.48	-1.1642	0.180571	-6.44734	1.13828e-10	1.022e-09
AAEL011584	15670.3	1.98862	0.308679	6.44234	1.17642e-10	1.0555e-09
AAEL014511	12752.2	-0.711816	0.110555	-6.43859	1.20586e-10	1.08117e-09
AAEL010582	5406.01	1.64175	0.255004	6.43813	1.20955e-10	1.08372e-09
AAEL004431	2392.44	-0.749141	0.116423	-6.43463	1.23778e-10	1.10824e-09
AAEL003170	622.89	0.98967	0.153852	6.43263	1.25415e-10	1.12212e-09
AAEL027751	488.243	-1.66575	0.258962	-6.43242	1.2559e-10	1.1229e-09
AAEL021093	533.961	1.11942	0.17404	6.43199	1.25946e-10	1.12531e-09
AAEL007624	6495.28	0.846828	0.131684	6.43078	1.26955e-10	1.13354e-09
AAEL018051	2305.72	0.618561	0.0962245	6.42831	1.29029e-10	1.15126e-09
AAEL005464	137.581	-2.09476	0.325904	-6.42755	1.29674e-10	1.15622e-09
AAEL009895	3088.46	-1.2871	0.20032	-6.42521	1.31692e-10	1.17339e-09
AAEL020234	604.528	-1.02187	0.159051	-6.42482	1.32027e-10	1.17557e-09
AAEL011242	2723.41	1.26679	0.197265	6.42177	1.34699e-10	1.19853e-09
AAEL007422	763.065	0.758356	0.118145	6.41888	1.37285e-10	1.2207e-09
AAEL024841	11129.5	0.559319	0.0871691	6.41648	1.39462e-10	1.2392e-09
AAEL020729	21599.8	-1.71774	0.267773	-6.41491	1.40902e-10	1.25114e-09
AAEL011465	7062.09	1.2469	0.194391	6.4144	1.41378e-10	1.2545e-09
AAEL002563	861.122	0.73493	0.11459	6.41358	1.42137e-10	1.26037e-09
AAEL002615	2954.09	-0.855038	0.133379	-6.41059	1.4496e-10	1.28452e-09
AAEL005709	1623.42	0.992001	0.15476	6.40995	1.45566e-10	1.289e-09
AAEL006641	1560.92	0.64871	0.101208	6.40965	1.45855e-10	1.29067e-09
AAEL028015	1194.68	1.83984	0.287241	6.4052	1.50168e-10	1.32792e-09
AAEL011603	725.497	0.825241	0.128956	6.39941	1.55974e-10	1.37832e-09
AAEL009991	14562.7	-1.28321	0.200538	-6.39887	1.56533e-10	1.38231e-09
AAEL010829	786.026	0.980594	0.15326	6.39825	1.57171e-10	1.387e-09
AAEL013314	1319.65	1.29472	0.202358	6.39814	1.57282e-10	1.38703e-09
AAEL010691	2733.33	1.31671	0.205878	6.39557	1.59946e-10	1.40955e-09
AAEL006510	3568.44	-0.770504	0.120511	-6.39362	1.62005e-10	1.42673e-09
AAEL022773	629.932	0.923252	0.144431	6.39235	1.63357e-10	1.43765e-09
AAEL008459	1326.09	0.719789	0.112631	6.39069	1.65144e-10	1.45239e-09
AAEL009883	4345.29	1.29053	0.201992	6.38901	1.66965e-10	1.4674e-09
AAEL009913	3558.58	0.470361	0.0736327	6.38793	1.68146e-10	1.47577e-09
AAEL017053	592.632	-1.1418	0.178742	-6.388	1.6807e-10	1.47577e-09
AAEL003519	2103.51	-0.634447	0.0993703	-6.38467	1.71763e-10	1.50649e-09
AAEL006474	2115.12	1.19593	0.187343	6.38367	1.72891e-10	1.51535e-09
AAEL000701	1363.41	0.920228	0.14419	6.38205	1.74736e-10	1.52975e-09
AAEL021755	1855.94	-1.24018	0.194324	-6.38202	1.74771e-10	1.52975e-09
AAEL010480	1387.33	1.41203	0.221271	6.38145	1.75423e-10	1.53442e-09
AAEL007084	822.053	-0.844011	0.132266	-6.38115	1.75768e-10	1.53639e-09
AAEL009422	21481.8	-0.445713	0.0698666	-6.37948	1.77689e-10	1.55213e-09
AAEL020535	1132.65	-0.733992	0.115109	-6.37649	1.8119e-10	1.58164e-09
AAEL019715	3747.39	0.66198	0.103822	6.37614	1.81612e-10	1.58425e-09
AAEL000038	5112.73	1.04626	0.164101	6.37575	1.82068e-10	1.58716e-09
AAEL018707	333.51	1.00509	0.157668	6.37477	1.83241e-10	1.5963e-09
AAEL001532	8188.54	1.84188	0.289016	6.37294	1.85442e-10	1.61438e-09
AAEL012092	35053.5	-0.577938	0.0906906	-6.37263	1.85818e-10	1.61657e-09
AAEL023850	9296.75	1.291	0.202669	6.36999	1.89044e-10	1.64352e-09
AAEL004193	2587.61	-1.40462	0.220563	-6.36836	1.91066e-10	1.65998e-09
AAEL010116	1340.6	-0.723997	0.113706	-6.36729	1.92403e-10	1.67047e-09
AAEL025680	3740.23	1.47489	0.231664	6.36651	1.93376e-10	1.67779e-09
AAEL004933	10652.8	1.60174	0.25163	6.36545	1.94722e-10	1.68834e-09
AAEL012939	10295.6	1.24608	0.195796	6.36417	1.96346e-10	1.70031e-09
AAEL023627	1066.28	0.818146	0.128555	6.36416	1.96367e-10	1.70031e-09
AAEL000486	14498.2	0.603489	0.0948365	6.36347	1.97246e-10	1.70677e-09
AAEL011983	1181.83	-0.717991	0.112833	-6.36331	1.97456e-10	1.70745e-09
AAEL006507	1740.48	0.782438	0.123013	6.36062	2.00938e-10	1.73639e-09
AAEL006978	4463.45	-1.34059	0.210848	-6.3581	2.04267e-10	1.76397e-09
AAEL005180	1425.85	0.845657	0.133042	6.35631	2.06664e-10	1.78348e-09
AAEL003534	2408.17	-1.35461	0.213146	-6.3553	2.08018e-10	1.79397e-09
AAEL012556	111.778	-2.62138	0.412669	-6.35225	2.12188e-10	1.82871e-09
AAEL021172	44.9986	-4.95301	0.779941	-6.3505	2.14621e-10	1.84843e-09
AAEL021950	2468.28	0.489779	0.0771572	6.34781	2.184e-10	1.87973e-09
AAEL020033	5403.03	-1.10831	0.174739	-6.34264	2.25865e-10	1.94268e-09
AAEL003968	2468.75	0.75169	0.118526	6.34201	2.26793e-10	1.94936e-09
AAEL012912	866.449	0.632881	0.0997987	6.34157	2.27429e-10	1.95352e-09
AAEL007321	222.961	1.57729	0.248823	6.339	2.31266e-10	1.98516e-09
AAEL010932	3431.8	3.51164	0.554019	6.33848	2.32049e-10	1.99056e-09
AAEL027360	421.51	-1.71933	0.27143	-6.33434	2.38361e-10	2.04334e-09
AAEL010945	1370.97	0.805525	0.127183	6.33358	2.39532e-10	2.05202e-09
AAEL000922	588.061	1.30465	0.206109	6.32992	2.45292e-10	2.09997e-09
AAEL018265	86.9167	-3.02667	0.478213	-6.32913	2.46548e-10	2.10932e-09
AAEL006752	1524.82	-0.891582	0.140898	-6.32784	2.48623e-10	2.12566e-09
AAEL002980	501.273	1.07172	0.16939	6.32694	2.50078e-10	2.13669e-09
AAEL012312	15956.7	0.873266	0.138069	6.32484	2.53491e-10	2.16441e-09
AAEL003206	2963.1	0.865474	0.136865	6.32356	2.55601e-10	2.18098e-09
AAEL001959	12045.6	0.881155	0.139356	6.32306	2.56439e-10	2.18669e-09
AAEL003552	1254.84	0.842101	0.133316	6.31658	2.67412e-10	2.27874e-09
AAEL023434	116.452	4.0452	0.640443	6.31626	2.67973e-10	2.28202e-09
AAEL006780	2485.89	0.492082	0.0779187	6.31532	2.69608e-10	2.29443e-09
AAEL009898	6033.42	0.724474	0.114734	6.31438	2.7124e-10	2.3068e-09
AAEL013896	2175.39	-0.472782	0.0748752	-6.31427	2.71444e-10	2.307e-09
AAEL026018	435.911	-1.04465	0.165474	-6.31305	2.73596e-10	2.32377e-09
AAEL010349	958.357	1.38667	0.219699	6.31169	2.76002e-10	2.34265e-09
AAEL006560	2249.5	0.744445	0.118057	6.3058	2.86709e-10	2.43193e-09
AAEL017545	3786.91	0.738054	0.117063	6.30478	2.88597e-10	2.44634e-09
AAEL000118	1096.28	0.775689	0.123061	6.30326	2.91441e-10	2.46882e-09
AAEL014816	1151.84	-1.0574	0.16778	-6.30233	2.93204e-10	2.48213e-09
AAEL011462	621.225	0.726871	0.115463	6.29528	3.06848e-10	2.59593e-09
AAEL013989	13669	0.963612	0.153085	6.29463	3.08141e-10	2.60515e-09
AAEL012102	726.738	0.86848	0.138044	6.29135	3.14718e-10	2.65902e-09
AAEL007049	8347.65	0.635417	0.101107	6.28461	3.28684e-10	2.77338e-09
AAEL005339	2988.85	0.691721	0.110066	6.28463	3.2864e-10	2.77338e-09
AAEL000904	1247.19	-0.866614	0.137903	-6.28425	3.29447e-10	2.77799e-09
AAEL015455	764.295	1.2492	0.198836	6.28255	3.33056e-10	2.8066e-09
AAEL005830	4605.24	0.873543	0.139151	6.27765	3.43727e-10	2.89462e-09
AAEL004287	3232.01	0.598812	0.0953924	6.27736	3.44378e-10	2.89822e-09
AAEL021501	1899.05	-0.640083	0.101977	-6.27671	3.45801e-10	2.9083e-09
AAEL017297	3951.39	-1.22674	0.195467	-6.27595	3.47502e-10	2.92069e-09
AAEL006436	3176.01	-0.604411	0.0963724	-6.27162	3.57307e-10	3.00115e-09
AAEL005147	936.2	-1.30538	0.208279	-6.26748	3.66948e-10	3.08011e-09
AAEL008418	350.725	-1.31921	0.210494	-6.26722	3.6756e-10	3.08325e-09
AAEL013492	353.864	-3.83392	0.611955	-6.26503	3.72757e-10	3.12481e-09
AAEL008696	6278.33	-0.936919	0.149558	-6.2646	3.73778e-10	3.13133e-09
AAEL011301	356.545	1.24861	0.199365	6.26296	3.7774e-10	3.16247e-09
AAEL022067	2623.9	1.75645	0.28049	6.26208	3.79879e-10	3.17832e-09
AAEL012325	3245.35	0.622521	0.0994181	6.26165	3.80933e-10	3.18506e-09
AAEL005016	1226.95	1.81949	0.290663	6.2598	3.85482e-10	3.22101e-09
AAEL014379	10499.8	0.649709	0.103839	6.25687	3.92783e-10	3.27989e-09
AAEL020636	379.306	-1.405	0.224632	-6.25469	3.98306e-10	3.32386e-09
AAEL001052	9374.66	1.9619	0.313707	6.25393	4.00247e-10	3.33789e-09
AAEL007548	10655	-0.59653	0.0954814	-6.2476	4.16799e-10	3.47368e-09
AAEL026852	2682.12	-0.595885	0.095459	-6.24231	4.31143e-10	3.59091e-09
AAEL001962	930.943	-0.989674	0.158578	-6.24093	4.34973e-10	3.62047e-09
AAEL004663	531.853	0.697308	0.111741	6.24038	4.36514e-10	3.62916e-09
AAEL006050	1583.17	0.558059	0.0894274	6.24035	4.3658e-10	3.62916e-09
AAEL013627	1097.27	-0.684164	0.109642	-6.24	4.37566e-10	3.63501e-09
AAEL005023	2222.77	-0.676655	0.108459	-6.23879	4.40974e-10	3.66096e-09
AAEL025223	2140.46	0.565733	0.0907149	6.23638	4.47814e-10	3.71058e-09
AAEL010776	164306	2.62098	0.42026	6.23657	4.47279e-10	3.71058e-09
AAEL026493	452.465	-0.745892	0.119602	-6.23647	4.47568e-10	3.71058e-09
AAEL015571	337.759	-1.06608	0.170967	-6.23557	4.50136e-10	3.72743e-09
AAEL013538	2447.16	0.575486	0.0923238	6.23334	4.5658e-10	3.77836e-09
AAEL004022	64.6388	-5.44458	0.873611	-6.23227	4.5971e-10	3.80182e-09
AAEL024853	5642.32	0.702975	0.112916	6.22562	4.79652e-10	3.96373e-09
AAEL009680	38538.6	-1.15477	0.185489	-6.22554	4.79902e-10	3.96373e-09
AAEL005042	218.199	-1.43783	0.231087	-6.22202	4.90809e-10	4.05121e-09
AAEL004553	3275.87	0.956696	0.153984	6.21295	5.19997e-10	4.28939e-09
AAEL012756	3866.44	-1.00039	0.161036	-6.21226	5.22287e-10	4.30553e-09
AAEL010246	935.679	0.776038	0.124974	6.2096	5.31185e-10	4.37608e-09
AAEL010732	1018.92	0.493681	0.0795273	6.20769	5.37695e-10	4.42688e-09
AAEL003379	703.9	0.722467	0.116486	6.20218	5.56863e-10	4.58177e-09
AAEL026488	5632.5	3.81436	0.615146	6.20074	5.61988e-10	4.62099e-09
AAEL010027	4873.33	1.20553	0.194543	6.19671	5.76573e-10	4.73789e-09
AAEL011693	1130.98	1.28344	0.207168	6.19516	5.82246e-10	4.78147e-09
AAEL012861	2488.41	-0.615582	0.0993673	-6.19502	5.82782e-10	4.78282e-09
AAEL011782	263.832	1.06259	0.171638	6.19089	5.98268e-10	4.90679e-09
AAEL020440	198.395	-1.88901	0.30515	-6.19043	6.00018e-10	4.91801e-09
AAEL005721	470.056	-0.805138	0.130088	-6.18917	6.04808e-10	4.95412e-09
AAEL003462	785.628	1.81667	0.29354	6.18885	6.06056e-10	4.9612e-09
AAEL003075	1191.45	-0.88358	0.142777	-6.18853	6.07276e-10	4.96803e-09
AAEL006982	1192.67	-1.43892	0.232616	-6.18583	6.17756e-10	5.05056e-09
AAEL002486	775.322	0.965062	0.156101	6.18231	6.31718e-10	5.16143e-09
AAEL010944	29.443	-7.87446	1.27412	-6.1803	6.3981e-10	5.22424e-09
AAEL006438	1101.52	-0.610749	0.0988428	-6.179	6.45106e-10	5.26415e-09
AAEL007017	1283.02	0.613002	0.0992498	6.17635	6.55997e-10	5.34963e-09
AAEL022629	822.148	1.26656	0.205104	6.17521	6.60772e-10	5.38517e-09
AAEL020955	6089.59	-1.28751	0.208588	-6.17252	6.72114e-10	5.47414e-09
AAEL019852	1184.15	0.858126	0.139034	6.17204	6.74149e-10	5.48725e-09
AAEL001705	3718.72	0.668274	0.108323	6.16927	6.86055e-10	5.58063e-09
AAEL011442	1289.93	0.648175	0.105079	6.16845	6.89643e-10	5.60629e-09
AAEL004345	4635.58	1.46565	0.237693	6.16614	6.99759e-10	5.68494e-09
AAEL027817	296.435	1.09326	0.177314	6.16566	7.01909e-10	5.69881e-09
AAEL013462	150.397	-1.73615	0.281625	-6.16477	7.05859e-10	5.72728e-09
AAEL004435	3912.81	-0.493283	0.0800289	-6.16381	7.10151e-10	5.75847e-09
AAEL005472	1469.43	0.677444	0.109921	6.16302	7.13706e-10	5.78367e-09
AAEL024913	3350.63	0.845491	0.137242	6.1606	7.24709e-10	5.86546e-09
AAEL007650	10922	0.843984	0.136997	6.16061	7.24639e-10	5.86546e-09
AAEL011338	139.011	1.84334	0.299245	6.15997	7.27567e-10	5.8849e-09
AAEL006523	209.219	1.40287	0.227877	6.15625	7.44899e-10	6.0213e-09
AAEL003008	410.932	-1.15252	0.187266	-6.15445	7.53384e-10	6.08608e-09
AAEL005725	443.531	0.937641	0.152354	6.15434	7.53901e-10	6.08644e-09
AAEL001062	2964.11	2.21768	0.360389	6.15357	7.57589e-10	6.11239e-09
AAEL024235	16680.3	-0.799425	0.130047	-6.14721	7.88557e-10	6.35827e-09
AAEL013463	757.629	1.42114	0.231313	6.14378	8.05792e-10	6.49317e-09
AAEL023741	509.062	0.742748	0.121038	6.13648	8.43695e-10	6.79435e-09
AAEL000186	1412.85	-1.18871	0.193771	-6.13463	8.53579e-10	6.86966e-09
AAEL021394	4154.38	-0.896571	0.146185	-6.13311	8.61751e-10	6.9311e-09
AAEL002761	23775.6	0.361016	0.058875	6.13191	8.68311e-10	6.97951e-09
AAEL011918	1465.32	-1.23421	0.201289	-6.13152	8.70429e-10	6.99218e-09
AAEL009423	5852.44	-0.842965	0.137499	-6.13068	8.75047e-10	7.0249e-09
AAEL000674	1065.87	1.6848	0.274843	6.13006	8.7847e-10	7.04799e-09
AAEL018178	1706.92	0.694461	0.113331	6.1277	8.9158e-10	7.14872e-09
AAEL006839	751.788	0.842554	0.13751	6.1272	8.94401e-10	7.16688e-09
AAEL007904	665.995	0.882892	0.144125	6.12588	9.01817e-10	7.22181e-09
AAEL003210	13559.6	-0.628959	0.102676	-6.12566	9.03057e-10	7.22726e-09
AAEL004896	759.554	0.949267	0.154973	6.12536	9.04768e-10	7.23646e-09
AAEL023074	171.935	-2.19002	0.357572	-6.12469	9.08603e-10	7.26263e-09
AAEL003569	2611.75	-0.8904	0.145407	-6.12352	9.15322e-10	7.3118e-09
AAEL009153	680.408	0.926532	0.151359	6.12142	9.27433e-10	7.40396e-09
AAEL011651	1145.12	1.17082	0.191338	6.11912	9.40951e-10	7.50723e-09
AAEL010960	1369.12	-0.628432	0.102732	-6.1172	9.52357e-10	7.59353e-09
AAEL010296	3020.56	0.966735	0.158098	6.1148	9.66769e-10	7.70368e-09
AAEL021931	35443.1	-1.53434	0.25095	-6.11413	9.70867e-10	7.73155e-09
AAEL001888	4083.06	1.72355	0.281939	6.11322	9.76391e-10	7.77075e-09
AAEL005877	2240.92	1.24899	0.204375	6.11124	9.88629e-10	7.86329e-09
AAEL001412	1426.92	1.49674	0.245013	6.10881	1.00378e-09	7.97884e-09
AAEL024812	3542.41	-0.569019	0.0931796	-6.10669	1.01716e-09	8.08026e-09
AAEL008952	1643.82	0.522192	0.0855339	6.10508	1.02747e-09	8.15715e-09
AAEL000682	3847.75	-0.793698	0.130038	-6.10359	1.03714e-09	8.22884e-09
AAEL005892	288.006	-1.07862	0.176918	-6.09669	1.08284e-09	8.58612e-09
AAEL004371	638.453	0.870809	0.142865	6.09533	1.09209e-09	8.65415e-09
AAEL006342	16804.8	0.908872	0.149131	6.09445	1.09813e-09	8.69668e-09
AAEL013142	774.249	1.99321	0.327229	6.09119	1.12074e-09	8.87031e-09
AAEL008692	2876.87	1.32393	0.217384	6.09028	1.12714e-09	8.9155e-09
AAEL006910	3413.69	0.691752	0.113586	6.09013	1.12819e-09	8.91834e-09
AAEL009220	1450.02	-0.826082	0.135695	-6.08777	1.14493e-09	9.04507e-09
AAEL025927	951.059	0.684691	0.112504	6.08593	1.1582e-09	9.14434e-09
AAEL022930	2415.19	-1.1126	0.1829	-6.08309	1.17888e-09	9.30189e-09
AAEL024210	2126.55	-1.16027	0.190804	-6.08093	1.1949e-09	9.42253e-09
AAEL009483	1796.03	1.55325	0.255486	6.07956	1.2051e-09	9.4972e-09
AAEL019562	1275.63	-1.20537	0.198285	-6.07899	1.20943e-09	9.52424e-09
AAEL003246	3248.48	0.765966	0.126004	6.07891	1.21001e-09	9.52424e-09
AAEL011274	5321.01	0.729829	0.120183	6.07265	1.25814e-09	9.89704e-09
AAEL008960	1142.21	1.43872	0.236946	6.07192	1.26391e-09	9.93631e-09
AAEL015062	869.929	0.698272	0.115048	6.06937	1.28409e-09	1.00889e-08
AAEL002816	737.03	-1.37569	0.226679	-6.06891	1.28783e-09	1.01121e-08
AAEL011099	2223.57	-0.580165	0.0956218	-6.06729	1.30088e-09	1.02083e-08
AAEL009303	535.178	-0.900514	0.148557	-6.06174	1.34653e-09	1.05601e-08
AAEL007022	5901.23	-0.381028	0.0628811	-6.0595	1.36546e-09	1.0702e-08
AAEL009274	1847.12	0.835053	0.137817	6.05914	1.36853e-09	1.07196e-08
AAEL024410	2808.33	-0.61747	0.101922	-6.05826	1.37601e-09	1.07716e-08
AAEL010491	3477.51	0.573872	0.094734	6.05772	1.38065e-09	1.08014e-08
AAEL003573	3074.36	0.603947	0.0997681	6.05351	1.4172e-09	1.10806e-08
AAEL007069	1325.97	-0.657126	0.108559	-6.05318	1.42013e-09	1.10968e-08
AAEL019699	1674.76	-0.788062	0.130243	-6.05069	1.44224e-09	1.12628e-08
AAEL003282	2036.62	0.586296	0.0969233	6.04907	1.45684e-09	1.13699e-08
AAEL012250	2364.58	0.553592	0.0915263	6.04845	1.46247e-09	1.14069e-08
AAEL012059	435.099	0.924332	0.152905	6.04515	1.49275e-09	1.1636e-08
AAEL007710	1705.88	0.552218	0.0913845	6.0428	1.51464e-09	1.17996e-08
AAEL009725	301.719	1.04797	0.173456	6.04171	1.52489e-09	1.18723e-08
AAEL004146	1175.97	-0.950158	0.1573	-6.0404	1.5373e-09	1.19616e-08
AAEL021810	1027.84	0.720415	0.119274	6.04002	1.54098e-09	1.1983e-08
AAEL001484	15913.9	-0.451482	0.0747573	-6.03931	1.54779e-09	1.20287e-08
AAEL013639	960.697	0.64811	0.107353	6.03717	1.56845e-09	1.21656e-08
AAEL004646	3714.62	-0.712494	0.118015	-6.03733	1.56689e-09	1.21656e-08
AAEL002850	744.723	-1.00955	0.167222	-6.03717	1.56843e-09	1.21656e-08
AAEL011038	11439.6	-0.997335	0.165201	-6.03709	1.56917e-09	1.21656e-08
AAEL000408	327.625	1.15725	0.191805	6.03344	1.60509e-09	1.24366e-08
AAEL016986	574.211	1.0403	0.172458	6.03219	1.61756e-09	1.25257e-08
AAEL024508	2601.33	0.729993	0.121068	6.0296	1.64369e-09	1.27203e-08
AAEL019840	132.994	1.33039	0.220716	6.02759	1.66422e-09	1.28715e-08
AAEL027008	265.655	-1.28948	0.213965	-6.02661	1.67434e-09	1.2942e-08
AAEL000842	798.001	-1.79943	0.298633	-6.02555	1.68535e-09	1.30193e-08
AAEL015059	235.991	-1.22368	0.203148	-6.0236	1.70575e-09	1.3169e-08
AAEL009965	315.426	7.66442	1.27244	6.02339	1.708e-09	1.31785e-08
AAEL001595	337.603	-1.32015	0.219192	-6.02284	1.71388e-09	1.32159e-08
AAEL001047	1291.1	-1.45136	0.240983	-6.02265	1.71582e-09	1.3223e-08
AAEL003115	243.255	-1.63075	0.270786	-6.02227	1.7199e-09	1.32465e-08
AAEL026896	5986.95	-1.74485	0.289816	-6.02054	1.73835e-09	1.33807e-08
AAEL013220	1129.46	0.987874	0.164091	6.02026	1.74133e-09	1.33955e-08
AAEL004490	2184.4	1.07892	0.17924	6.01943	1.75034e-09	1.34568e-08
AAEL004728	780.899	-2.33751	0.38836	-6.01893	1.75578e-09	1.34906e-08
AAEL006337	1981.73	0.578578	0.0961534	6.01724	1.7742e-09	1.3624e-08
AAEL004569	419.508	-1.25507	0.208588	-6.01697	1.7771e-09	1.36382e-08
AAEL007238	2951.34	1.2323	0.204883	6.01465	1.80277e-09	1.3827e-08
AAEL010598	691.48	0.642894	0.10689	6.01452	1.80426e-09	1.38301e-08
AAEL000947	6440.45	1.05515	0.17553	6.01125	1.841e-09	1.41034e-08
AAEL004235	2744.96	-0.66607	0.110806	-6.01113	1.8424e-09	1.41057e-08
AAEL007342	25660.9	-0.824667	0.13726	-6.00807	1.87741e-09	1.43653e-08
AAEL002651	889.924	-0.695033	0.115701	-6.00713	1.88831e-09	1.44401e-08
AAEL024236	68.9795	2.98164	0.49655	6.00472	1.9166e-09	1.46477e-08
AAEL008807	1060.03	-0.85071	0.141687	-6.00414	1.92354e-09	1.46921e-08
AAEL014943	7625.45	0.668307	0.111413	5.99846	1.99199e-09	1.52058e-08
AAEL002464	6999.55	0.770723	0.128507	5.9975	2.00376e-09	1.52866e-08
AAEL013760	7023.1	-0.595183	0.0992869	-5.99458	2.04017e-09	1.55552e-08
AAEL022938	841.085	1.37096	0.228798	5.992	2.0728e-09	1.57947e-08
AAEL019814	782.314	-1.16989	0.195385	-5.98759	2.12969e-09	1.62186e-08
AAEL004980	2065.54	-0.850803	0.142103	-5.98723	2.13447e-09	1.62454e-08
AAEL010496	3939.43	0.656037	0.109598	5.98586	2.15243e-09	1.63724e-08
AAEL002818	3491.14	0.507437	0.084817	5.98273	2.19425e-09	1.66769e-08
AAEL001934	116.215	-1.86932	0.312456	-5.98267	2.19505e-09	1.66769e-08
AAEL004563	10854.2	0.630798	0.105492	5.97956	2.23738e-09	1.69886e-08
AAEL012140	454.403	0.944332	0.15794	5.97904	2.2445e-09	1.70326e-08
AAEL023255	805.41	1.79844	0.300866	5.97754	2.26529e-09	1.71802e-08
AAEL019450	3739.17	-0.549216	0.0918944	-5.9766	2.27847e-09	1.72701e-08
AAEL012409	15873.1	-0.757208	0.126709	-5.97596	2.28741e-09	1.73276e-08
AAEL012117	4257.3	-0.914472	0.153029	-5.97581	2.28944e-09	1.73322e-08
AAEL013243	394.532	1.13804	0.190444	5.97572	2.29071e-09	1.73322e-08
AAEL009085	7199.83	-0.587969	0.0984238	-5.97385	2.3172e-09	1.75224e-08
AAEL006374	618.921	0.77243	0.129363	5.97104	2.35744e-09	1.78162e-08
AAEL010777	16065	0.972276	0.162841	5.97071	2.36216e-09	1.78415e-08
AAEL000336	94.1487	-1.84096	0.30836	-5.97018	2.36991e-09	1.78895e-08
AAEL007160	11108.7	0.363712	0.0609242	5.96991	2.37381e-09	1.79085e-08
AAEL006919	27.1282	8.60733	1.44246	5.96711	2.41486e-09	1.82075e-08
AAEL004095	1125.88	-0.804786	0.135019	-5.96056	2.51379e-09	1.89423e-08
AAEL010087	4794.27	0.888549	0.149109	5.95904	2.53718e-09	1.91074e-08
AAEL013229	6699.69	1.35769	0.227908	5.95716	2.5666e-09	1.93177e-08
AAEL025750	119.596	3.38447	0.568206	5.9564	2.57848e-09	1.93957e-08
AAEL011306	1279.01	-0.684873	0.115002	-5.95532	2.59558e-09	1.9513e-08
AAEL003287	4644.87	0.881428	0.148056	5.95334	2.6273e-09	1.974e-08
AAEL017071	5595.7	1.12319	0.188851	5.9475	2.72272e-09	2.0445e-08
AAEL002501	13775.6	0.566888	0.0953295	5.94662	2.73735e-09	2.05309e-08
AAEL025801	1921.07	0.761683	0.128086	5.94667	2.73652e-09	2.05309e-08
AAEL003871	5764.02	0.833215	0.140125	5.94623	2.74386e-09	2.05678e-08
AAEL005588	133.638	-1.81866	0.30589	-5.94546	2.75686e-09	2.06532e-08
AAEL002310	76.9062	-1.83182	0.308159	-5.94442	2.77443e-09	2.07728e-08
AAEL002539	43671.5	0.54793	0.0921841	5.94386	2.7838e-09	2.08308e-08
AAEL009383	552.937	0.799139	0.134451	5.94371	2.78648e-09	2.08388e-08
AAEL000452	1299.8	-0.598229	0.100697	-5.94087	2.83506e-09	2.11898e-08
AAEL000707	1315.87	0.716328	0.120637	5.93787	2.88745e-09	2.15689e-08
AAEL011564	6267.64	1.26874	0.213696	5.93712	2.90081e-09	2.16561e-08
AAEL026440	130.855	2.12979	0.35875	5.93671	2.90794e-09	2.16968e-08
AAEL004384	4247.73	-0.791283	0.133297	-5.93625	2.91609e-09	2.1745e-08
AAEL005422	2111.69	-0.753605	0.127188	-5.92515	3.1201e-09	2.32528e-08
AAEL010909	218.495	-1.88927	0.318874	-5.9248	3.12676e-09	2.3289e-08
AAEL013756	1806.08	-0.854712	0.144415	-5.91843	3.25029e-09	2.41951e-08
AAEL020042	668.987	-0.938651	0.158688	-5.91507	3.31731e-09	2.46798e-08
AAEL020960	5329.92	-0.974147	0.1647	-5.91468	3.32519e-09	2.47242e-08
AAEL000293	43045.8	0.848215	0.143465	5.91236	3.37249e-09	2.50614e-08
AAEL006791	176.28	-1.54722	0.261705	-5.91209	3.37798e-09	2.50877e-08
AAEL001795	817.065	1.5539	0.262938	5.90974	3.42641e-09	2.54327e-08
AAEL026297	229.235	1.4153	0.239579	5.90745	3.47441e-09	2.57742e-08
AAEL022000	54.9387	-2.90174	0.491244	-5.90691	3.48588e-09	2.58444e-08
AAEL008164	2406.6	-0.922588	0.156216	-5.90586	3.50807e-09	2.5994e-08
AAEL006454	22.3243	-6.65876	1.12753	-5.90562	3.51331e-09	2.60179e-08
AAEL006659	3289.68	0.485887	0.0823165	5.90267	3.5766e-09	2.64714e-08
AAEL003645	47781	0.790004	0.13387	5.90128	3.60698e-09	2.66809e-08
AAEL010469	151.825	-2.56321	0.434377	-5.90089	3.61537e-09	2.67276e-08
AAEL002886	41513	1.15977	0.196569	5.90007	3.63351e-09	2.68463e-08
AAEL000234	5877.37	-0.887505	0.15044	-5.89939	3.64856e-09	2.69421e-08
AAEL009477	10716.8	-1.04528	0.177236	-5.89769	3.68623e-09	2.72047e-08
AAEL009285	2852.75	1.48079	0.251209	5.89466	3.75444e-09	2.76922e-08
AAEL006516	23304.6	0.598888	0.101601	5.89453	3.75743e-09	2.76984e-08
AAEL008356	3713.04	-0.897473	0.152313	-5.8923	3.80847e-09	2.80587e-08
AAEL014642	7366.72	0.494582	0.083946	5.89167	3.82319e-09	2.8151e-08
AAEL005239	1750.08	-0.640242	0.108688	-5.89066	3.84662e-09	2.83073e-08
AAEL001395	650.424	0.775344	0.131695	5.88744	3.92225e-09	2.88475e-08
AAEL021986	1825.61	0.468896	0.0797015	5.88315	4.02531e-09	2.95886e-08
AAEL010479	40705	-1.23457	0.209878	-5.88234	4.04495e-09	2.9716e-08
AAEL021184	185.143	-1.49564	0.254524	-5.87621	4.19762e-09	3.082e-08
AAEL002469	2088.2	-1.11037	0.189003	-5.87486	4.23192e-09	3.10541e-08
AAEL009767	848.15	0.709611	0.120817	5.87341	4.2691e-09	3.13092e-08
AAEL014257	317.843	-1.04884	0.178661	-5.87057	4.34299e-09	3.1833e-08
AAEL010200	381.969	-0.962901	0.164043	-5.86979	4.36338e-09	3.19642e-08
AAEL005375	34.6496	-2.9666	0.505466	-5.86903	4.38341e-09	3.20927e-08
AAEL027289	635.302	0.930211	0.15862	5.8644	4.5076e-09	3.29833e-08
AAEL014154	1529.35	0.884228	0.150808	5.86328	4.53825e-09	3.31887e-08
AAEL003108	5514.75	-0.575888	0.0982474	-5.86161	4.58395e-09	3.35039e-08
AAEL014275	17672.2	0.875986	0.149469	5.86064	4.61082e-09	3.36812e-08
AAEL009114	1574.01	-1.2111	0.206866	-5.85452	4.78387e-09	3.49255e-08
AAEL014267	83.3462	-1.79776	0.3071	-5.85399	4.79908e-09	3.50167e-08
AAEL021736	1510.8	0.646867	0.110518	5.85305	4.82634e-09	3.51957e-08
AAEL009469	483.097	0.696414	0.119025	5.85097	4.88704e-09	3.56182e-08
AAEL027465	3772.08	0.51987	0.0889054	5.84745	4.99163e-09	3.63599e-08
AAEL023657	734.112	-1.25335	0.214346	-5.84733	4.9953e-09	3.63661e-08
AAEL026469	20.6767	5.92407	1.01388	5.84299	5.12735e-09	3.73064e-08
AAEL008424	2785.88	-1.30988	0.224186	-5.84285	5.1316e-09	3.73163e-08
AAEL022913	1711.92	-1.28564	0.220093	-5.84132	5.1788e-09	3.7617e-08
AAEL011271	6650.47	0.781423	0.133774	5.84139	5.17686e-09	3.7617e-08
AAEL000981	1554.17	0.730441	0.125152	5.83644	5.33277e-09	3.87137e-08
AAEL005358	1642.08	0.785256	0.134625	5.83292	5.44655e-09	3.95174e-08
AAEL013847	426.566	-1.54393	0.264704	-5.83268	5.45425e-09	3.9551e-08
AAEL000594	1595.46	-0.550866	0.094479	-5.83056	5.52414e-09	4.00353e-08
AAEL000386	5086.22	-0.7569	0.129856	-5.82878	5.5833e-09	4.04413e-08
AAEL022272	256.304	1.5145	0.260049	5.82389	5.74929e-09	4.16202e-08
AAEL021027	75.528	7.96505	1.36768	5.82378	5.753e-09	4.16237e-08
AAEL007042	20953.7	0.640157	0.109933	5.82318	5.77387e-09	4.17513e-08
AAEL005484	287.868	-1.00488	0.172587	-5.82244	5.7996e-09	4.19138e-08
AAEL027384	1666.5	-0.861948	0.148044	-5.82225	5.80619e-09	4.19379e-08
AAEL009850	807.746	1.52093	0.261245	5.82183	5.82074e-09	4.20195e-08
AAEL002658	885.028	1.75318	0.301234	5.81998	5.88529e-09	4.24617e-08
AAEL013184	5974.46	-0.956822	0.164412	-5.81966	5.89678e-09	4.25208e-08
AAEL019482	29556.4	-0.743856	0.127833	-5.81898	5.92068e-09	4.26693e-08
AAEL008878	6270.86	1.34832	0.231739	5.81825	5.9468e-09	4.28336e-08
AAEL020073	1904.45	-0.81331	0.139818	-5.81694	5.99364e-09	4.31468e-08
AAEL018181	1021.6	0.616801	0.10606	5.81561	6.04129e-09	4.34656e-08
AAEL002430	1287.81	1.00833	0.173572	5.80927	6.27473e-09	4.512e-08
AAEL011343	14880.5	0.770384	0.132636	5.80825	6.3129e-09	4.53691e-08
AAEL014965	14028.1	-0.635774	0.109516	-5.80528	6.42584e-09	4.61551e-08
AAEL026520	763.063	-0.757403	0.130476	-5.80492	6.43972e-09	4.6229e-08
AAEL021629	151.439	-1.45645	0.250959	-5.80354	6.49285e-09	4.65845e-08
AAEL014960	5579.39	-0.515264	0.0887874	-5.80335	6.50014e-09	4.66109e-08
AAEL019601	2494.17	1.55483	0.268245	5.79628	6.7801e-09	4.85913e-08
AAEL009890	1001.44	-0.805579	0.139056	-5.7932	6.90583e-09	4.94381e-08
AAEL024953	10120.6	1.31892	0.227668	5.7932	6.90592e-09	4.94381e-08
AAEL006259	215.762	-6.35549	1.09749	-5.79094	6.9995e-09	5.00802e-08
AAEL028013	4935.4	-2.39715	0.414017	-5.78997	7.03969e-09	5.03399e-08
AAEL012683	38.0553	-3.16729	0.547481	-5.7852	7.24272e-09	5.1763e-08
AAEL017543	1127.7	0.613341	0.106021	5.78507	7.24822e-09	5.17736e-08
AAEL021301	2475.01	0.595381	0.102937	5.78393	7.29759e-09	5.20974e-08
AAEL013883	1013.64	-0.740841	0.128089	-5.78378	7.30398e-09	5.21142e-08
AAEL011063	7948.92	-0.68009	0.117634	-5.78142	7.40733e-09	5.27931e-08
AAEL004951	380.85	-1.46063	0.25264	-5.78148	7.40484e-09	5.27931e-08
AAEL003491	2175.74	0.800779	0.138542	5.78003	7.46856e-09	5.32001e-08
AAEL020609	14188.7	-1.06769	0.184726	-5.77985	7.47665e-09	5.32283e-08
AAEL028110	230.513	-1.164	0.201396	-5.77966	7.48535e-09	5.32609e-08
AAEL023321	67.193	-3.62488	0.627319	-5.77837	7.54259e-09	5.36385e-08
AAEL005415	1680.24	0.598897	0.103702	5.77518	7.6872e-09	5.46367e-08
AAEL001844	1302.9	-0.966752	0.167514	-5.77118	7.87176e-09	5.59177e-08
AAEL006270	544.765	-0.844457	0.146377	-5.76905	7.97198e-09	5.65984e-08
AAEL014377	294.445	1.53785	0.266742	5.76529	8.15154e-09	5.78414e-08
AAEL022991	4218.91	0.732498	0.127113	5.76257	8.28446e-09	5.87199e-08
AAEL001593	10918.6	-0.986876	0.171256	-5.76259	8.2833e-09	5.87199e-08
AAEL026357	25357.2	3.04826	0.529187	5.76027	8.39781e-09	5.94907e-08
AAEL027755	3473.63	-1.04452	0.181424	-5.75737	8.54325e-09	6.04877e-08
AAEL004546	13786.9	0.477243	0.0829073	5.75635	8.59536e-09	6.08233e-08
AAEL013445	595.019	-0.66299	0.115229	-5.75367	8.73282e-09	6.1762e-08
AAEL000938	310.127	1.18811	0.206546	5.75227	8.80535e-09	6.22409e-08
AAEL010761	1136.69	0.476952	0.0829297	5.75129	8.85674e-09	6.25698e-08
AAEL000394	1128.07	0.747496	0.130007	5.74967	8.9417e-09	6.31355e-08
AAEL013997	3751.29	-0.517272	0.089982	-5.74862	8.99741e-09	6.3494e-08
AAEL012931	713.954	-1.00015	0.17403	-5.74697	9.08551e-09	6.40807e-08
AAEL012156	520.363	0.760425	0.132321	5.74681	9.09411e-09	6.41063e-08
AAEL026096	219.931	1.26515	0.220202	5.74541	9.16962e-09	6.46032e-08
AAEL000604	386.234	-2.25563	0.39301	-5.73937	9.50295e-09	6.69151e-08
AAEL010644	881.752	1.68287	0.29335	5.73674	9.65173e-09	6.79256e-08
AAEL022570	102989	-0.799619	0.139394	-5.73642	9.67009e-09	6.80177e-08
AAEL001041	6390.43	0.561339	0.0978731	5.73538	9.72955e-09	6.83986e-08
AAEL008594	4624.96	0.71536	0.124731	5.73523	9.73811e-09	6.84215e-08
AAEL002401	5161.15	0.678971	0.11839	5.73502	9.75012e-09	6.84686e-08
AAEL002109	58.0613	2.93051	0.511049	5.7343	9.79135e-09	6.87207e-08
AAEL009061	4001.32	1.06734	0.186192	5.73245	9.89923e-09	6.944e-08
AAEL004441	2087.88	0.623617	0.108795	5.73202	9.92423e-09	6.95775e-08
AAEL010688	868.673	-1.09199	0.190513	-5.73186	9.9337e-09	6.96061e-08
AAEL023044	1579.15	0.746608	0.130294	5.73018	1.00324e-08	7.02595e-08
AAEL001507	2396.09	0.543767	0.0949138	5.72906	1.00989e-08	7.06871e-08
AAEL008393	2652.12	1.3176	0.229994	5.72883	1.01123e-08	7.07424e-08
AAEL017315	31086	0.778444	0.135899	5.72811	1.01559e-08	7.10084e-08
AAEL003539	1283.93	0.549775	0.0960268	5.72523	1.03295e-08	7.2183e-08
AAEL025993	20345.3	1.08287	0.189151	5.7249	1.03496e-08	7.22849e-08
AAEL000258	2515.29	-0.901973	0.157557	-5.72474	1.03593e-08	7.23131e-08
AAEL001218	13679.1	0.683638	0.119535	5.71916	1.07054e-08	7.4689e-08
AAEL004522	34413.4	-0.968766	0.169438	-5.71753	1.08083e-08	7.53656e-08
AAEL002918	404.526	1.25372	0.219413	5.71398	1.10365e-08	7.69155e-08
AAEL000109	3026.14	1.34797	0.235944	5.71311	1.10932e-08	7.72688e-08
AAEL008636	1013.61	0.642504	0.11248	5.71215	1.11556e-08	7.76617e-08
AAEL013963	1937.93	0.818447	0.143284	5.71206	1.11618e-08	7.76625e-08
AAEL025509	563.146	0.533193	0.0933665	5.71075	1.12481e-08	7.82207e-08
AAEL018700	714.458	-1.04401	0.182871	-5.70896	1.13669e-08	7.90047e-08
AAEL013778	7820.57	0.710544	0.124629	5.70128	1.18908e-08	8.26014e-08
AAEL010043	479.411	-1.29472	0.2271	-5.70109	1.19041e-08	8.26491e-08
AAEL024762	138.214	-1.54155	0.270508	-5.69873	1.20703e-08	8.37582e-08
AAEL010067	429.934	1.29146	0.226653	5.69795	1.21254e-08	8.40954e-08
AAEL003163	122.473	-2.42921	0.426579	-5.69463	1.2364e-08	8.57036e-08
AAEL004875	1539.59	-0.932853	0.16393	-5.69056	1.26626e-08	8.77264e-08
AAEL002779	3788.24	0.50077	0.0880028	5.69039	1.26749e-08	8.77645e-08
AAEL003746	10092.1	-0.829051	0.145703	-5.68999	1.27049e-08	8.79247e-08
AAEL006386	1456.3	0.865104	0.152134	5.68645	1.2971e-08	8.97182e-08
AAEL002493	676.054	1.11521	0.196137	5.68589	1.30131e-08	8.99616e-08
AAEL001906	4435.6	-0.826262	0.145328	-5.68551	1.30422e-08	9.01144e-08
AAEL014999	3196.51	0.851993	0.149857	5.68538	1.3052e-08	9.01338e-08
AAEL002607	415.057	-1.17724	0.207148	-5.6831	1.32273e-08	9.12956e-08
AAEL021087	95.8902	1.75052	0.308179	5.68019	1.34543e-08	9.2812e-08
AAEL007509	1264.82	0.716319	0.126113	5.67999	1.34701e-08	9.28718e-08
AAEL025336	125.654	-1.51947	0.26764	-5.67728	1.36854e-08	9.43059e-08
AAEL006521	649.651	0.98292	0.173185	5.67556	1.38238e-08	9.52084e-08
AAEL001797	918.151	0.747558	0.131769	5.67326	1.40103e-08	9.64417e-08
AAEL007390	4022.92	0.610266	0.107589	5.67219	1.40987e-08	9.69981e-08
AAEL006865	141.15	1.94412	0.342764	5.67189	1.41231e-08	9.71139e-08
AAEL001166	1117.82	0.88567	0.156158	5.67162	1.41457e-08	9.72175e-08
AAEL009842	11192	-0.881953	0.155566	-5.66931	1.43372e-08	9.84815e-08
AAEL012330	879.327	0.542148	0.0956492	5.66809	1.44398e-08	9.91333e-08
AAEL025569	2048.23	-1.07164	0.189111	-5.66673	1.4555e-08	9.98712e-08
AAEL025594	6140.1	0.699301	0.123456	5.66439	1.47545e-08	1.01186e-07
AAEL020583	497.699	0.676318	0.119403	5.66416	1.47743e-08	1.01248e-07
AAEL021655	234.213	1.19205	0.210456	5.66411	1.47793e-08	1.01248e-07
AAEL004467	3288.14	0.684409	0.12087	5.66235	1.49317e-08	1.02238e-07
AAEL004168	1830.7	-0.690386	0.12195	-5.66124	1.50281e-08	1.02844e-07
AAEL004554	761.621	0.793267	0.140129	5.66099	1.505e-08	1.02939e-07
AAEL009308	1167.79	1.2628	0.223096	5.66035	1.51064e-08	1.0327e-07
AAEL000388	10867.9	1.28624	0.227292	5.65899	1.5227e-08	1.04039e-07
AAEL013970	1053.7	-0.544611	0.0962405	-5.65885	1.52389e-08	1.04065e-07
AAEL006609	4464.92	-1.65057	0.291869	-5.65515	1.55708e-08	1.06275e-07
AAEL008330	17574.8	1.18271	0.209281	5.65128	1.59258e-08	1.08641e-07
AAEL000583	605.108	0.787251	0.139352	5.64937	1.61035e-08	1.09795e-07
AAEL004486	1080.18	0.871254	0.154254	5.64817	1.62169e-08	1.1051e-07
AAEL001638	791.964	0.647516	0.114733	5.64366	1.66471e-08	1.13382e-07
AAEL005947	6335.01	0.665095	0.117877	5.64227	1.67825e-08	1.14243e-07
AAEL012981	6.72252	20.8626	3.69774	5.64199	1.68094e-08	1.14366e-07
AAEL000559	1754.79	0.608764	0.107923	5.64071	1.69355e-08	1.15163e-07
AAEL004031	5770.41	-1.97707	0.350621	-5.63877	1.71274e-08	1.16407e-07
AAEL018151	3143.03	-0.547157	0.0970601	-5.6373	1.72736e-08	1.17339e-07
AAEL027202	282.67	-2.53664	0.450228	-5.63412	1.7595e-08	1.19459e-07
AAEL000257	683.167	0.701417	0.124511	5.63335	1.76737e-08	1.1993e-07
AAEL007591	10661.3	2.66813	0.473681	5.63277	1.7734e-08	1.20276e-07
AAEL001104	4624.64	-0.675167	0.119897	-5.63124	1.78924e-08	1.21286e-07
AAEL006885	69357.8	0.392524	0.0697273	5.62941	1.80825e-08	1.22484e-07
AAEL014422	1441.38	1.26526	0.224761	5.62936	1.80881e-08	1.22484e-07
AAEL024494	261.008	1.47208	0.261534	5.62862	1.81653e-08	1.22942e-07
AAEL005510	578.942	0.863382	0.153406	5.62808	1.8223e-08	1.23268e-07
AAEL006131	128.392	2.37109	0.421336	5.62755	1.82785e-08	1.23579e-07
AAEL000290	408.43	0.848691	0.150831	5.62678	1.83605e-08	1.24068e-07
AAEL022296	1397.53	-1.61554	0.28721	-5.62496	1.85549e-08	1.25316e-07
AAEL006938	201.74	1.03576	0.184234	5.62201	1.88747e-08	1.27342e-07
AAEL005245	159.064	2.05076	0.36477	5.62207	1.88684e-08	1.27342e-07
AAEL009196	27.5195	-7.01486	1.24807	-5.62058	1.90318e-08	1.28335e-07
AAEL009844	2060.99	-1.08062	0.192293	-5.61967	1.9132e-08	1.28944e-07
AAEL004306	1432.78	0.94485	0.168145	5.61927	1.91768e-08	1.29178e-07
AAEL012100	1660.66	1.27481	0.226907	5.61819	1.92969e-08	1.29919e-07
AAEL011842	1016.67	-0.701137	0.124831	-5.61668	1.94662e-08	1.30991e-07
AAEL020261	2112.34	-0.600455	0.106949	-5.61442	1.97226e-08	1.32578e-07
AAEL000636	34.2509	-7.61198	1.35577	-5.61449	1.97138e-08	1.32578e-07
AAEL010620	313.215	-1.03328	0.184051	-5.61406	1.97634e-08	1.32782e-07
AAEL002912	2120.54	0.651078	0.116006	5.61245	1.99486e-08	1.33957e-07
AAEL002337	829.37	0.958567	0.17089	5.60928	2.03173e-08	1.36362e-07
AAEL023629	2491.8	0.580333	0.103484	5.60793	2.04757e-08	1.37282e-07
AAEL015142	821.896	-0.519328	0.0926054	-5.60797	2.04714e-08	1.37282e-07
AAEL010148	3658.75	-0.719319	0.128393	-5.6025	2.11283e-08	1.4151e-07
AAEL008760	1678.92	-1.62377	0.28983	-5.6025	2.11283e-08	1.4151e-07
AAEL001339	2115.02	0.665047	0.118724	5.6016	2.12376e-08	1.42169e-07
AAEL007799	1860.51	1.64486	0.293837	5.59786	2.17017e-08	1.452e-07
AAEL019882	1755.28	-0.753884	0.13469	-5.59718	2.17869e-08	1.45695e-07
AAEL004147	1328.14	0.698483	0.124899	5.59239	2.23968e-08	1.49695e-07
AAEL000315	1111.86	-0.691771	0.123717	-5.59155	2.2505e-08	1.5034e-07
AAEL009224	1084.87	0.676231	0.120989	5.58918	2.28143e-08	1.52328e-07
AAEL004327	9068.16	0.924892	0.165537	5.58722	2.30733e-08	1.53977e-07
AAEL011548	119.434	-1.74394	0.31216	-5.58668	2.31454e-08	1.54378e-07
AAEL001113	123141	0.876581	0.156909	5.58657	2.31602e-08	1.54397e-07
AAEL010154	3163.02	-1.01407	0.181632	-5.58306	2.36321e-08	1.57462e-07
AAEL006138	8798.59	5.68669	1.01886	5.5814	2.38588e-08	1.5889e-07
AAEL022152	112.121	-2.45229	0.439445	-5.58043	2.39931e-08	1.59702e-07
AAEL006012	3770.02	1.53673	0.275494	5.57808	2.43189e-08	1.61787e-07
AAEL006708	1964.04	1.01217	0.181611	5.57329	2.4997e-08	1.66213e-07
AAEL000724	383.38	-0.91127	0.163542	-5.57208	2.51719e-08	1.67289e-07
AAEL018266	240.13	-1.22259	0.21944	-5.57143	2.52656e-08	1.67826e-07
AAEL007279	233.522	-1.08036	0.193989	-5.56918	2.55934e-08	1.69915e-07
AAEL004243	531.075	0.886678	0.159356	5.56414	2.63455e-08	1.74819e-07
AAEL001649	6237.77	0.692073	0.1244	5.56328	2.64744e-08	1.75583e-07
AAEL006039	1254.44	0.962697	0.173101	5.56148	2.67495e-08	1.77317e-07
AAEL007760	1415.41	0.730028	0.1313	5.55999	2.69787e-08	1.78744e-07
AAEL010256	2266.62	-0.611577	0.110066	-5.55648	2.75263e-08	1.82279e-07
AAEL009371	1325.64	-1.3864	0.249553	-5.55554	2.76754e-08	1.83172e-07
AAEL009195	1101.24	1.54452	0.278147	5.55289	2.80991e-08	1.85881e-07
AAEL024995	51.8153	-1.93028	0.347674	-5.55198	2.82449e-08	1.8675e-07
AAEL004502	187.455	-1.87988	0.338607	-5.55182	2.82718e-08	1.86832e-07
AAEL009217	1341.36	0.863722	0.155841	5.54233	2.98469e-08	1.97139e-07
AAEL009533	444.098	-1.65969	0.299469	-5.54211	2.98842e-08	1.97285e-07
AAEL015404	6525.14	-1.57189	0.283697	-5.54074	3.01197e-08	1.98738e-07
AAEL006145	4916.8	0.328733	0.0593581	5.53812	3.05729e-08	2.01625e-07
AAEL007329	684.944	-0.971074	0.175361	-5.53756	3.0671e-08	2.02169e-07
AAEL020094	92.495	-2.29602	0.41483	-5.53485	3.11494e-08	2.05216e-07
AAEL007055	13663	1.18766	0.214653	5.53295	3.14888e-08	2.07347e-07
AAEL011354	132.045	-1.46372	0.264569	-5.53246	3.15778e-08	2.07826e-07
AAEL002397	410.789	-1.49369	0.270096	-5.53021	3.19852e-08	2.104e-07
AAEL017562	1627.96	0.597335	0.108054	5.5281	3.23718e-08	2.12835e-07
AAEL009667	643.275	-0.971242	0.175722	-5.52714	3.25485e-08	2.13888e-07
AAEL007880	64277.4	1.45947	0.264062	5.52699	3.25771e-08	2.13967e-07
AAEL015140	32.6475	8.49397	1.5376	5.52418	3.31022e-08	2.17305e-07
AAEL013138	8373.54	-0.669173	0.12125	-5.51894	3.41058e-08	2.23779e-07
AAEL025533	1292.21	1.04097	0.188646	5.51811	3.42668e-08	2.24721e-07
AAEL004142	1646.29	0.895952	0.1624	5.51696	3.44915e-08	2.2608e-07
AAEL027408	5678.69	-0.773895	0.140287	-5.51652	3.45779e-08	2.26531e-07
AAEL008650	659.657	0.715413	0.129688	5.51641	3.46004e-08	2.26563e-07
AAEL008306	1768.65	-1.07283	0.194532	-5.51494	3.48901e-08	2.28344e-07
AAEL001914	5198.4	-0.900048	0.163263	-5.51286	3.53053e-08	2.30945e-07
AAEL024837	471.487	-1.18355	0.214957	-5.50597	3.67143e-08	2.40039e-07
AAEL007532	806.777	0.730779	0.132762	5.50443	3.70368e-08	2.42025e-07
AAEL007792	5945.76	-0.630208	0.114558	-5.50119	3.77245e-08	2.46394e-07
AAEL022692	409.565	-1.09481	0.199043	-5.50036	3.79008e-08	2.4742e-07
AAEL000427	17151.4	0.807863	0.14689	5.49978	3.80265e-08	2.48115e-07
AAEL021342	24240.6	0.618431	0.112476	5.49835	3.83366e-08	2.50012e-07
AAEL009356	206.607	1.0011	0.18212	5.49693	3.86462e-08	2.51904e-07
AAEL003001	746.543	0.603618	0.109829	5.49597	3.88566e-08	2.53147e-07
AAEL024053	3816.2	-0.550215	0.100135	-5.49471	3.91353e-08	2.54834e-07
AAEL000782	701.136	1.06256	0.193413	5.4937	3.93588e-08	2.5616e-07
AAEL022118	751.393	-0.824749	0.150152	-5.49276	3.95708e-08	2.5741e-07
AAEL022714	33.5111	-3.87545	0.705667	-5.4919	3.97629e-08	2.58529e-07
AAEL000523	813.295	-1.58686	0.289061	-5.48971	4.02594e-08	2.61626e-07
AAEL005001	8567.35	-3.57415	0.651182	-5.48872	4.04866e-08	2.62969e-07
AAEL002665	228.824	-1.45743	0.265564	-5.48808	4.06323e-08	2.63654e-07
AAEL022914	580.45	-1.0024	0.182651	-5.48808	4.06329e-08	2.63654e-07
AAEL005968	1713.87	0.624845	0.113858	5.48793	4.06675e-08	2.63746e-07
AAEL005013	4444.59	1.40844	0.256781	5.48497	4.13543e-08	2.68065e-07
AAEL008259	40.1768	-3.69682	0.674017	-5.48475	4.14059e-08	2.6813e-07
AAEL007992	5901.2	1.66841	0.30419	5.48475	4.14046e-08	2.6813e-07
AAEL001334	1638.63	0.684473	0.124904	5.48	4.25335e-08	2.75155e-07
AAEL022687	799.483	0.617559	0.112692	5.48008	4.25145e-08	2.75155e-07
AAEL009625	8469.4	-1.03173	0.188294	-5.47934	4.26917e-08	2.7604e-07
AAEL003674	484.772	-0.906557	0.165471	-5.47866	4.28567e-08	2.76968e-07
AAEL015116	86.4915	-4.79315	0.874938	-5.47827	4.29497e-08	2.7743e-07
AAEL012520	299.084	1.37763	0.251557	5.47641	4.34042e-08	2.80225e-07
AAEL000805	1270.07	1.08039	0.19731	5.47557	4.3611e-08	2.8142e-07
AAEL010590	7557.1	-0.822907	0.150299	-5.47513	4.372e-08	2.81982e-07
[truncated: 17,764 more rows]

## Sheet: Mg6v0
geneID	baseMean	log2FoldChange	lfcSE	stat	pvalue	padj
AAEL006113	17282.2	3.62561	0.135598	26.738	1.70439e-157	2.14276e-153
AAEL000807	11356.8	3.10738	0.118318	26.263	5.07377e-152	3.18937e-148
AAEL006879	22005.7	-2.76465	0.106692	-25.9125	4.81814e-148	2.01912e-144
AAEL013005	8735.3	3.53066	0.138724	25.4509	6.90093e-143	2.16896e-139
AAEL010369	256.188	44.171	1.75754	25.1323	2.20423e-139	5.54232e-136
AAEL001887	209317	6.86197	0.274962	24.9561	1.83568e-137	3.84636e-134
AAEL010065	31490	3.46285	0.139001	24.9124	5.45448e-137	9.79624e-134
AAEL012621	13213.6	1.8161	0.0730034	24.877	1.3212e-136	2.07627e-133
AAEL026215	70492.5	3.76244	0.15209	24.7382	4.15624e-135	5.80581e-132
AAEL001588	42341.2	3.62742	0.156861	23.1251	2.58912e-118	3.25504e-115
AAEL012827	43676.6	4.12191	0.182322	22.6079	3.62116e-113	4.13865e-110
AAEL002866	4454.53	-1.75985	0.0778702	-22.5998	4.35645e-113	4.56411e-110
AAEL019408	53832.1	4.94294	0.218871	22.5838	6.2541e-113	6.04819e-110
AAEL004229	11234.6	7.12184	0.319238	22.3089	3.03174e-110	2.7225e-107
AAEL011369	5434.08	-2.75846	0.127014	-21.7177	1.39549e-104	1.16961e-101
AAEL013845	13925.5	1.59008	0.0739312	21.5075	1.32411e-102	1.04042e-99
AAEL012975	8369.15	-3.83359	0.178404	-21.4883	2.00341e-102	1.48158e-99
AAEL005411	9354.56	2.10519	0.0979981	21.4819	2.29875e-102	1.60555e-99
AAEL008096	13523.5	4.90921	0.229263	21.413	1.01022e-101	6.68446e-99
AAEL000417	92625.3	3.40204	0.160157	21.242	3.90984e-100	2.45772e-97
AAEL009946	10270.2	1.81442	0.0854717	21.2283	5.23131e-100	3.13181e-97
AAEL024267	52041.4	4.61022	0.218334	21.1155	5.7345e-99	3.277e-96
AAEL004335	37272.4	6.74496	0.320219	21.0636	1.71588e-98	9.37915e-96
AAEL001533	5014.22	7.23791	0.347461	20.8308	2.27408e-96	1.19124e-93
AAEL001693	245950	6.56174	0.316479	20.7336	1.72535e-95	8.67643e-93
AAEL004870	2763.76	9.00852	0.43786	20.574	4.69468e-94	2.27006e-91
AAEL008134	61854.3	3.16656	0.154071	20.5526	7.28748e-94	3.39327e-91
AAEL017263	23363.2	2.13721	0.104917	20.3705	3.05539e-92	1.37187e-89
AAEL014325	5590.69	1.9829	0.097748	20.2859	1.71388e-91	7.42996e-89
AAEL003742	26149.5	9.2686	0.458065	20.2342	4.8906e-91	2.04949e-88
AAEL003192	6782.35	4.24303	0.215879	19.6547	5.26673e-86	2.13592e-83
AAEL001005	139499	3.00545	0.153017	19.6413	6.85569e-86	2.69343e-83
AAEL012122	7490.44	1.57638	0.0803534	19.6181	1.08351e-85	4.12784e-83
AAEL023069	8152.51	1.92317	0.0984946	19.5256	6.64874e-85	2.45847e-82
AAEL001707	2912.09	3.56507	0.182986	19.4827	1.53951e-84	5.52994e-82
AAEL005991	8337.32	2.81775	0.145475	19.3693	1.40027e-83	4.89005e-81
AAEL002906	7356.4	1.97107	0.102166	19.2929	6.16424e-83	2.09451e-80
AAEL019582	4206.06	2.94851	0.15289	19.2852	7.1574e-83	2.36797e-80
AAEL012238	11610.7	2.98256	0.155287	19.2067	3.25049e-82	1.04783e-79
AAEL003764	32734.2	2.64271	0.13785	19.1709	6.47475e-82	2.03501e-79
AAEL002701	3277.33	3.22974	0.168989	19.1121	2.00251e-81	6.14039e-79
AAEL006315	7543.73	1.6836	0.088242	19.0794	3.74681e-81	1.12155e-78
AAEL012095	11143.7	1.97283	0.103565	19.0492	6.67647e-81	1.95201e-78
AAEL002387	1404.03	2.00426	0.105486	19.0002	1.69878e-80	4.85387e-78
AAEL012084	1754.31	1.72098	0.0907441	18.9651	3.31139e-80	9.25128e-78
AAEL002560	60215.9	3.14713	0.166147	18.9418	5.15789e-80	1.40967e-77
AAEL025078	6559.31	2.2854	0.121329	18.8364	3.7968e-79	1.0156e-76
AAEL001769	8179.7	-1.91464	0.101675	-18.8309	4.21726e-79	1.10457e-76
AAEL013230	7109.56	1.63987	0.087163	18.8138	5.82224e-79	1.49382e-76
AAEL021440	5409.18	-3.62001	0.193108	-18.746	2.08703e-78	5.24764e-76
AAEL001464	5984.45	5.27681	0.282282	18.6934	5.60018e-78	1.3805e-75
AAEL003318	154763	4.58225	0.245416	18.6713	8.47157e-78	2.04817e-75
AAEL022632	13466.8	-2.49697	0.133861	-18.6535	1.18363e-77	2.80767e-75
AAEL013884	13220.1	5.05592	0.271459	18.625	2.01674e-77	4.69528e-75
AAEL024283	2562.63	-3.37632	0.181881	-18.5633	6.36532e-77	1.455e-74
AAEL023223	9693.51	-2.81292	0.151988	-18.5075	1.79666e-76	4.03349e-74
AAEL010202	769662	8.6301	0.470844	18.329	4.85913e-75	1.07174e-72
AAEL010109	5609.72	4.91365	0.268623	18.292	9.5788e-75	2.07629e-72
AAEL004520	8163.94	-2.13814	0.116946	-18.2831	1.12806e-74	2.40373e-72
AAEL001812	3818.11	-4.42712	0.242697	-18.2413	2.42506e-74	5.08131e-72
AAEL024824	1752.22	3.98354	0.218543	18.2277	3.11291e-74	6.41565e-72
AAEL002703	2799.31	1.85404	0.101819	18.2092	4.36387e-74	8.84881e-72
AAEL001864	8040.88	-3.80809	0.209938	-18.1391	1.56484e-73	3.12273e-71
AAEL011756	55623.6	3.73743	0.206146	18.13	1.84816e-73	3.63048e-71
AAEL027249	12360.1	1.35241	0.074652	18.1162	2.37234e-73	4.58846e-71
AAEL008461	23704.4	1.49835	0.0827937	18.0974	3.33881e-73	6.35992e-71
AAEL027336	35437	3.6815	0.204421	18.0094	1.64357e-72	3.08402e-70
AAEL006915	2690.93	2.56303	0.142364	18.0033	1.83398e-72	3.39071e-70
AAEL025830	1424.13	1.83896	0.102506	17.9399	5.75428e-72	1.04845e-69
AAEL005481	14242.4	-2.3264	0.129694	-17.9376	5.99921e-72	1.07746e-69
AAEL000641	106284	1.63862	0.0916582	17.8775	1.76631e-71	3.12761e-69
AAEL005821	63670.7	3.35666	0.189403	17.7223	2.82271e-70	4.92877e-68
AAEL004451	3104.39	4.74371	0.268016	17.6993	4.24406e-70	7.30909e-68
AAEL022623	12728.5	4.52933	0.256066	17.6882	5.17338e-70	8.78915e-68
AAEL015007	5070.97	2.27408	0.128731	17.6654	7.74904e-70	1.29895e-67
AAEL012578	46122	4.13271	0.234036	17.6585	8.76031e-70	1.44914e-67
AAEL004977	11486.9	1.32808	0.0754365	17.6052	2.24638e-69	3.66773e-67
AAEL024516	4669.62	2.57314	0.146964	17.5086	1.23117e-68	1.98439e-66
AAEL011578	3784.96	2.72948	0.15617	17.4777	2.12011e-68	3.37393e-66
AAEL005832	13316.7	-2.37489	0.135904	-17.4747	2.2319e-68	3.50744e-66
AAEL019640	3166.4	-2.1356	0.122503	-17.433	4.63434e-68	7.19295e-66
AAEL007030	62403.6	4.91825	0.282535	17.4075	7.23246e-68	1.10886e-65
AAEL007011	8149.34	-3.02146	0.173978	-17.3669	1.46889e-67	2.22492e-65
AAEL013611	77249	5.4794	0.316896	17.2908	5.51627e-67	8.25602e-65
AAEL010787	101148	-3.6409	0.210629	-17.2859	6.01224e-67	8.89245e-65
AAEL010048	2776.12	1.90326	0.110533	17.2189	1.91655e-66	2.80172e-64
AAEL012419	9698.03	1.60641	0.0933696	17.2049	2.43997e-66	3.5259e-64
AAEL019685	6705.42	-3.24086	0.188539	-17.1893	3.19151e-66	4.55951e-64
AAEL004425	1758.26	2.96521	0.172799	17.1598	5.30581e-66	7.49491e-64
AAEL001100	87007.7	8.29787	0.483881	17.1486	6.44205e-66	8.99883e-64
AAEL004930	71160.5	-3.24332	0.189139	-17.1478	6.52973e-66	9.02107e-64
AAEL001703	1.17562e+06	-2.59358	0.151531	-17.1158	1.13103e-65	1.54558e-63
AAEL013065	1279.42	3.17841	0.18621	17.0689	2.52825e-65	3.41775e-63
AAEL012918	9470.86	1.52856	0.0895675	17.0661	2.65493e-65	3.55083e-63
AAEL017349	56955.2	3.6173	0.212198	17.0468	3.69038e-65	4.88373e-63
AAEL007229	2714.99	2.0123	0.118074	17.0427	3.95801e-65	5.18334e-63
AAEL022406	3195.19	-1.56094	0.0916867	-17.0247	5.38591e-65	6.98058e-63
AAEL004583	7313.63	-3.00452	0.176535	-17.0194	5.89857e-65	7.56702e-63
AAEL009838	2258.76	-2.543	0.149649	-16.9932	9.22702e-65	1.17174e-62
AAEL006095	19976.4	-2.06683	0.121665	-16.9879	1.01007e-64	1.26985e-62
AAEL007286	6490.8	2.56292	0.151061	16.9661	1.46355e-64	1.82176e-62
AAEL010435	109037	9.89568	0.583749	16.9519	1.86175e-64	2.2947e-62
AAEL019552	3764.93	2.81977	0.166601	16.9253	2.9269e-64	3.57252e-62
AAEL002061	10023	1.44912	0.0856998	16.9093	3.84435e-64	4.64722e-62
AAEL002508	6101.53	1.31688	0.0779415	16.8957	4.83918e-64	5.79411e-62
AAEL000020	2710.51	1.42836	0.0846014	16.8834	5.9646e-64	7.07424e-62
AAEL014734	102018	3.39938	0.201626	16.8598	8.88572e-64	1.04403e-61
AAEL012943	6523.56	1.77371	0.105477	16.8161	1.86163e-63	2.16708e-61
AAEL010765	55761.2	1.66055	0.0987968	16.8078	2.14144e-63	2.46992e-61
AAEL003785	10303.7	1.29445	0.0770731	16.7951	2.6488e-63	3.02734e-61
AAEL002913	14056.5	1.80228	0.107323	16.7931	2.74258e-63	3.10628e-61
AAEL019746	9115.97	2.39634	0.14293	16.7659	4.33664e-63	4.86788e-61
AAEL008370	12049.4	2.50239	0.149462	16.7426	6.4088e-63	7.13022e-61
AAEL004407	1570.96	-3.65207	0.218737	-16.6962	1.39741e-62	1.54107e-60
AAEL023188	13239.2	2.22945	0.133542	16.6947	1.43277e-62	1.56632e-60
AAEL004043	9538.75	2.84893	0.170919	16.6683	2.23009e-62	2.41696e-60
AAEL001432	34025.1	2.06528	0.12405	16.6488	3.08639e-62	3.31642e-60
AAEL007090	8546.37	6.02949	0.362655	16.626	4.52013e-62	4.81585e-60
AAEL011905	96692.3	-1.95377	0.117594	-16.6146	5.46634e-62	5.77503e-60
AAEL003452	1488.71	-2.29004	0.138047	-16.5889	8.39024e-62	8.79017e-60
AAEL004308	3500.35	2.00769	0.121343	16.5456	1.72244e-61	1.78963e-59
AAEL009232	12863.8	4.76885	0.28837	16.5373	1.97737e-61	2.03767e-59
AAEL014797	19678.3	2.92414	0.177013	16.5193	2.66321e-61	2.72211e-59
AAEL009114	1574.01	-3.50327	0.212729	-16.4682	6.21014e-61	6.29628e-59
AAEL007812	21511.7	5.45756	0.332305	16.4233	1.30182e-60	1.30932e-58
AAEL025807	26945.3	-4.38448	0.267068	-16.4171	1.4424e-60	1.43919e-58
AAEL010477	1503.78	6.22561	0.379472	16.406	1.73343e-60	1.71596e-58
AAEL007874	8518.54	-2.13653	0.130391	-16.3856	2.42501e-60	2.38182e-58
AAEL008879	69312.7	3.58388	0.21896	16.3677	3.2521e-60	3.16941e-58
AAEL000802	3571.78	1.25919	0.0772388	16.3026	9.45944e-60	9.14801e-58
AAEL013098	12614.6	1.5335	0.0941679	16.2848	1.2658e-59	1.21478e-57
AAEL014275	17672.2	2.42952	0.149358	16.2664	1.70912e-59	1.62781e-57
AAEL025915	10736.3	-2.67995	0.164794	-16.2624	1.82502e-59	1.72513e-57
AAEL014248	5350.78	3.11143	0.191446	16.2523	2.15164e-59	2.01868e-57
AAEL013127	192844	9.15591	0.564627	16.2158	3.8971e-59	3.62921e-57
AAEL010844	2516.4	1.4654	0.0904126	16.2079	4.43204e-59	4.09703e-57
AAEL000269	14410.8	-1.78874	0.110439	-16.1966	5.32568e-59	4.88718e-57
AAEL013118	491501	8.88525	0.549281	16.1761	7.43166e-59	6.77035e-57
AAEL012825	12057.5	3.13706	0.194958	16.091	2.9515e-58	2.66952e-56
AAEL026602	13291.4	3.92181	0.243827	16.0844	3.28306e-58	2.94819e-56
AAEL012875	5898.97	1.31868	0.0821831	16.0456	6.13705e-58	5.47199e-56
AAEL008291	5661.65	1.73085	0.10803	16.0219	8.98053e-58	7.95093e-56
AAEL003666	18952.6	2.69382	0.168426	15.9941	1.40542e-57	1.23559e-55
AAEL021782	4499.2	-2.37875	0.148769	-15.9896	1.5104e-57	1.31867e-55
AAEL013712	596314	5.56703	0.348614	15.969	2.10082e-57	1.82148e-55
AAEL029070	22263	5.22678	0.327643	15.9527	2.72945e-57	2.35032e-55
AAEL004733	3958.15	1.85839	0.116553	15.9446	3.10504e-57	2.65554e-55
AAEL004743	9293.87	2.88618	0.181606	15.8925	7.1403e-57	6.06539e-55
AAEL012440	40053.4	3.43288	0.216238	15.8755	9.368e-57	7.90433e-55
AAEL000092	5729.45	2.03676	0.128461	15.8551	1.29623e-56	1.08641e-54
AAEL002950	3425.14	-2.82154	0.178455	-15.8109	2.61763e-56	2.1794e-54
AAEL008564	6068.43	-1.70839	0.108056	-15.8102	2.64802e-56	2.19019e-54
AAEL006870	3688.68	3.37679	0.213915	15.7857	3.90337e-56	3.20739e-54
AAEL008177	731.438	-1.71633	0.108734	-15.7846	3.97041e-56	3.2413e-54
AAEL003508	58246.2	2.92823	0.185718	15.7671	5.24101e-56	4.25097e-54
AAEL018323	13987.9	1.88814	0.11981	15.7594	5.91993e-56	4.77085e-54
AAEL006381	303294	6.63865	0.421392	15.7541	6.43668e-56	5.15427e-54
AAEL009859	26295.2	-2.01286	0.127852	-15.7436	7.59615e-56	6.04423e-54
AAEL003084	2444.66	1.8861	0.119845	15.7378	8.3275e-56	6.58449e-54
AAEL018278	3823.72	1.14907	0.0733533	15.6648	2.63149e-55	2.06769e-53
AAEL010977	56210.6	-1.57675	0.100796	-15.643	3.70658e-55	2.89435e-53
AAEL010220	1208.02	3.00323	0.192179	15.6273	4.74741e-55	3.68422e-53
AAEL012443	3875.11	6.07716	0.389078	15.6194	5.3725e-55	4.14375e-53
AAEL008406	8991.07	2.57631	0.164951	15.6187	5.43173e-55	4.16388e-53
AAEL026564	2808.02	-2.4323	0.155738	-15.6179	5.50041e-55	4.19098e-53
AAEL008656	5806.38	2.16051	0.138353	15.6159	5.67225e-55	4.29587e-53
AAEL006174	4329.72	1.84515	0.118329	15.5934	8.07125e-55	6.07615e-53
AAEL027637	7491.58	2.18849	0.140555	15.5703	1.15806e-54	8.66612e-53
AAEL001839	6653.99	6.29143	0.404325	15.5603	1.35419e-54	1.00739e-52
AAEL011314	3503.23	2.66963	0.171646	15.5532	1.51426e-54	1.11984e-52
AAEL011465	7062.09	3.01752	0.194193	15.5388	1.89585e-54	1.39384e-52
AAEL019550	6714.31	-3.43285	0.221275	-15.5139	2.79173e-54	2.04056e-52
AAEL023958	8171.28	7.1008	0.457728	15.5131	2.82696e-54	2.05437e-52
AAEL007403	9229.65	1.78427	0.115232	15.4842	4.43776e-54	3.20641e-52
AAEL010650	20150.4	4.16326	0.26898	15.478	4.88693e-54	3.51077e-52
AAEL001916	12070.1	1.3126	0.0850153	15.4396	8.87167e-54	6.33719e-52
AAEL007383	218263	2.05157	0.132897	15.4373	9.18744e-54	6.52568e-52
AAEL010151	1412.16	-2.78662	0.180653	-15.4253	1.10616e-53	7.81271e-52
AAEL024500	4363.89	1.51382	0.0981804	15.4187	1.22488e-53	8.60287e-52
AAEL010017	29229.2	2.09409	0.136364	15.3567	3.19512e-53	2.23162e-51
AAEL019565	2757.82	2.78176	0.181186	15.3531	3.37644e-53	2.34523e-51
AAEL002805	1490.88	1.6997	0.110725	15.3507	3.50535e-53	2.42139e-51
AAEL009165	187126	7.92368	0.516384	15.3445	3.85248e-53	2.64664e-51
AAEL006144	1089.63	2.48192	0.161771	15.3422	3.99459e-53	2.72935e-51
AAEL012034	1981.06	1.45144	0.0946138	15.3407	4.08917e-53	2.77886e-51
AAEL014821	18702.9	3.26002	0.212922	15.3109	6.46605e-53	4.37049e-51
AAEL021667	21679.1	-1.94241	0.127294	-15.2592	1.43004e-52	9.61417e-51
AAEL022213	2949.72	1.90058	0.124616	15.2515	1.60872e-52	1.07579e-50
AAEL019720	1138.08	-3.22056	0.211291	-15.2423	1.85292e-52	1.23254e-50
AAEL011217	1884.99	2.09355	0.13746	15.2302	2.22749e-52	1.4739e-50
AAEL004440	4937.57	-2.53728	0.166719	-15.2189	2.64933e-52	1.74384e-50
AAEL014768	18806.2	-3.39993	0.223416	-15.218	2.68811e-52	1.76015e-50
AAEL003634	5393.14	1.4172	0.0932081	15.2047	3.2896e-52	2.14284e-50
AAEL000080	42360	7.20323	0.473973	15.1976	3.67063e-52	2.37872e-50
AAEL003431	4925.01	1.67667	0.110681	15.1487	7.72926e-52	4.98319e-50
AAEL018699	6539.76	-2.16276	0.142776	-15.1479	7.82273e-52	5.01772e-50
AAEL026497	2618.94	1.40675	0.0929221	15.1391	8.94944e-52	5.71129e-50
AAEL011136	4093.35	1.31018	0.0869357	15.0706	2.52715e-51	1.60461e-49
AAEL015136	19377.3	5.78112	0.383611	15.0702	2.54206e-51	1.60597e-49
AAEL027982	2406.64	-3.97256	0.264322	-15.0292	4.72566e-51	2.97055e-49
AAEL023271	1714.81	-2.67501	0.178045	-15.0243	5.08848e-51	3.18271e-49
AAEL009166	183658	9.55197	0.636084	15.0168	5.69514e-51	3.54452e-49
AAEL000568	5174.49	1.31928	0.088054	14.9826	9.53561e-51	5.9055e-49
AAEL025961	9463.3	4.20627	0.281366	14.9495	1.57039e-50	9.67789e-49
AAEL022013	727.944	-1.85338	0.124342	-14.9055	3.03718e-50	1.86261e-48
AAEL013267	6445.19	-1.81441	0.12197	-14.8759	4.7266e-50	2.8846e-48
AAEL000541	6536.75	-2.28833	0.153972	-14.862	5.817e-50	3.53292e-48
AAEL011813	4314.15	1.36409	0.0917875	14.8614	5.86912e-50	3.54743e-48
AAEL011598	2073.71	4.5097	0.303827	14.843	7.72651e-50	4.64774e-48
AAEL008281	3606.5	2.70214	0.182336	14.8196	1.09476e-49	6.55398e-48
AAEL024469	423.753	-2.2495	0.151808	-14.8181	1.11955e-49	6.6706e-48
AAEL012351	14932.6	3.17162	0.214477	14.7877	1.75921e-49	1.04325e-47
AAEL014640	18041.8	1.2273	0.0831474	14.7606	2.6298e-49	1.5522e-47
AAEL009764	13743.6	2.76215	0.187275	14.7492	3.11366e-49	1.8292e-47
AAEL018161	14706.7	-1.34737	0.0913705	-14.7462	3.25555e-49	1.90367e-47
AAEL019909	1718.98	-2.64632	0.179518	-14.7413	3.50127e-49	2.03787e-47
AAEL011560	4113.35	1.62411	0.110351	14.7176	4.96945e-49	2.87907e-47
AAEL019826	8680.41	-1.50235	0.10212	-14.7116	5.42965e-49	3.13126e-47
AAEL000270	3243.53	1.83533	0.124911	14.693	7.14471e-49	4.10152e-47
AAEL025245	913.674	-3.07334	0.209406	-14.6765	9.1179e-49	5.21046e-47
AAEL012131	44916.5	2.64605	0.180526	14.6575	1.20705e-48	6.86654e-47
AAEL010585	12091.1	1.90295	0.13018	14.6178	2.16369e-48	1.22531e-46
AAEL006634	7542.04	3.20064	0.219561	14.5774	3.90978e-48	2.2042e-46
AAEL001896	11013.1	-1.27739	0.0877292	-14.5607	4.99725e-48	2.8047e-46
AAEL009330	49263.6	-3.19944	0.219737	-14.5603	5.02454e-48	2.80749e-46
AAEL019523	23211.3	-2.77624	0.191077	-14.5295	7.882e-48	4.38462e-46
AAEL015110	158051	2.74869	0.189795	14.4825	1.56405e-47	8.66221e-46
AAEL003963	2096.46	-2.76934	0.191366	-14.4715	1.83529e-47	1.01198e-45
AAEL011554	5952.71	1.27622	0.0882078	14.4683	1.9203e-47	1.05423e-45
AAEL011980	11294.7	2.2241	0.153736	14.467	1.95846e-47	1.07051e-45
AAEL005457	9896.84	1.38379	0.0956782	14.463	2.07608e-47	1.12989e-45
AAEL015603	1781.82	-2.48325	0.171762	-14.4575	2.24891e-47	1.21868e-45
AAEL002182	1481.24	-1.97347	0.136675	-14.4392	2.93333e-47	1.58274e-45
AAEL014754	2900.18	4.97443	0.34456	14.4371	3.02514e-47	1.6253e-45
AAEL012904	20892.5	0.781517	0.054139	14.4354	3.09953e-47	1.65818e-45
AAEL008876	39586.9	5.91628	0.410447	14.4142	4.21159e-47	2.24356e-45
AAEL025993	20345.3	2.72084	0.189065	14.391	5.89417e-47	3.12665e-45
AAEL021728	6260.51	2.12106	0.147535	14.3767	7.2461e-47	3.82765e-45
AAEL003993	11172.9	3.08783	0.21483	14.3734	7.60585e-47	4.00087e-45
AAEL015070	12995.3	2.87617	0.20026	14.3621	8.94125e-47	4.68372e-45
AAEL023219	11370.7	-2.68894	0.187925	-14.3086	1.93464e-46	1.00922e-44
AAEL005336	47391.9	3.98901	0.279259	14.2843	2.74251e-46	1.42475e-44
AAEL007804	3039.92	-2.563	0.179503	-14.2783	2.98978e-46	1.54681e-44
AAEL003365	6854.14	3.48753	0.244278	14.2769	3.04948e-46	1.57123e-44
AAEL024497	6348.83	2.32727	0.163054	14.273	3.22468e-46	1.65472e-44
AAEL004884	5192.79	2.37922	0.166973	14.2492	4.53727e-46	2.3188e-44
AAEL008248	18461.9	-1.08791	0.0764659	-14.2274	6.19118e-46	3.15124e-44
AAEL002789	5200.95	1.45882	0.102597	14.2189	6.99746e-46	3.54726e-44
AAEL003541	2177.34	-2.361	0.166314	-14.196	9.69283e-46	4.89391e-44
AAEL001331	8718.64	2.07542	0.146213	14.1945	9.91441e-46	4.98576e-44
AAEL007651	4320.75	-1.12741	0.0794643	-14.1877	1.09219e-45	5.47051e-44
AAEL018326	18030.4	3.2871	0.231885	14.1756	1.29784e-45	6.47476e-44
AAEL004607	1687.17	-1.75972	0.124371	-14.149	1.89502e-45	9.4167e-44
AAEL014842	8068.93	2.7862	0.19698	14.1446	2.01638e-45	9.98031e-44
AAEL009898	6033.42	1.61855	0.114448	14.1423	2.08504e-45	1.02796e-43
AAEL017056	1199.34	4.1166	0.291333	14.1303	2.47234e-45	1.21415e-43
AAEL009497	2022.26	3.08154	0.218339	14.1136	3.133e-45	1.53261e-43
AAEL010366	6249.3	-3.59491	0.254734	-14.1124	3.18385e-45	1.55145e-43
AAEL009317	22559.2	1.27222	0.0901921	14.1056	3.50666e-45	1.70215e-43
AAEL005185	4305	-1.69965	0.120577	-14.096	4.01905e-45	1.94337e-43
AAEL025650	4049.2	-2.28914	0.162439	-14.0924	4.23186e-45	2.03843e-43
AAEL002174	8219.86	2.10677	0.14983	14.061	6.59415e-45	3.16419e-43
AAEL008672	24756	1.85763	0.132491	14.0208	1.1629e-44	5.55891e-43
AAEL012528	2270.62	-2.87687	0.205594	-13.9929	1.72149e-44	8.19797e-43
AAEL027240	1450.59	-2.85782	0.204635	-13.9655	2.53222e-44	1.20132e-42
AAEL027091	1559.79	4.0024	0.286914	13.9498	3.15458e-44	1.49095e-42
AAEL021581	1500.27	-1.92416	0.137959	-13.9474	3.26499e-44	1.53736e-42
AAEL013072	1860.85	2.51688	0.180772	13.9229	4.59756e-44	2.15674e-42
AAEL008521	10459.7	1.131	0.0813352	13.9054	5.87199e-44	2.74434e-42
AAEL012688	1616.7	6.58874	0.474246	13.8931	6.97695e-44	3.24868e-42
AAEL014526	6946.4	3.31017	0.238673	13.8691	9.74908e-44	4.52271e-42
AAEL014915	3152.61	1.47251	0.106262	13.8573	1.14953e-43	5.31322e-42
AAEL004984	4679.99	0.904971	0.0653319	13.8519	1.23881e-43	5.70488e-42
AAEL006525	4928.63	-1.90348	0.137494	-13.8441	1.38186e-43	6.34041e-42
AAEL005080	1733.92	1.36845	0.0989372	13.8315	1.64584e-43	7.52417e-42
AAEL000410	7259.84	1.40655	0.102056	13.7821	3.2671e-43	1.48819e-41
AAEL010476	1521.33	1.82017	0.13218	13.7704	3.84161e-43	1.74357e-41
AAEL005918	4750.37	2.3428	0.170212	13.764	4.19531e-43	1.89725e-41
AAEL000797	5180.23	7.52913	0.54717	13.7601	4.42813e-43	1.99536e-41
AAEL011142	1821.37	-2.26091	0.16435	-13.7567	4.6411e-43	2.08386e-41
AAEL007029	11276.5	-1.35203	0.0983405	-13.7485	5.19997e-43	2.32648e-41
AAEL008770	4214.86	1.56275	0.11371	13.7433	5.59056e-43	2.49236e-41
AAEL020485	7201.59	2.14268	0.155985	13.7365	6.14011e-43	2.72768e-41
AAEL006441	3650.54	1.62598	0.118476	13.7242	7.27683e-43	3.22128e-41
AAEL014068	3173.65	1.5861	0.115644	13.7153	8.22399e-43	3.62779e-41
AAEL002804	21332.9	1.31568	0.0960187	13.7023	9.83636e-43	4.32387e-41
AAEL017022	240434	-1.28857	0.0942994	-13.6647	1.65028e-42	7.22904e-41
AAEL012783	345879	2.63526	0.193084	13.6482	2.06887e-42	9.03121e-41
AAEL004489	1211.46	-1.75252	0.128541	-13.6339	2.51608e-42	1.09454e-40
AAEL007049	8347.65	1.37388	0.100882	13.6186	3.10336e-42	1.34536e-40
AAEL027549	10390.2	2.96071	0.217785	13.5947	4.30653e-42	1.86054e-40
AAEL023977	1329.9	1.19661	0.0880481	13.5904	4.56516e-42	1.96552e-40
AAEL019470	288247	8.54653	0.629885	13.5684	6.1664e-42	2.64587e-40
AAEL018178	1706.92	1.5287	0.112698	13.5646	6.49552e-42	2.77761e-40
AAEL023742	917.829	4.81535	0.355111	13.5601	6.90412e-42	2.94232e-40
AAEL001434	4848.11	-2.28488	0.168616	-13.5508	7.83888e-42	3.32941e-40
AAEL014014	1607.12	3.18688	0.235451	13.5352	9.69176e-42	4.10252e-40
AAEL009487	9928.8	-5.26113	0.389892	-13.4938	1.70066e-41	7.17472e-40
AAEL011901	5552.23	2.74458	0.203525	13.4852	1.91064e-41	8.03365e-40
AAEL010488	2510.4	2.43185	0.180381	13.4817	2.00461e-41	8.40065e-40
AAEL004277	3117.05	3.96762	0.294357	13.4789	2.08048e-41	8.68962e-40
AAEL007160	11108.7	0.818421	0.0607864	13.4639	2.55196e-41	1.06236e-39
AAEL008211	911.524	2.08835	0.15515	13.4602	2.68182e-41	1.11273e-39
AAEL010060	3682.56	1.31772	0.0980579	13.4381	3.61389e-41	1.49454e-39
AAEL024876	371.608	3.20573	0.239067	13.4093	5.33145e-41	2.19761e-39
AAEL000314	4522.62	-2.33877	0.174651	-13.3912	6.81096e-41	2.79828e-39
AAEL002859	15340.5	-2.05077	0.153237	-13.383	7.60452e-41	3.11414e-39
AAEL021894	19039	1.54513	0.115547	13.3723	8.7779e-41	3.58298e-39
AAEL010296	3020.56	2.1084	0.157771	13.3637	9.8577e-41	4.01071e-39
AAEL007136	5732	3.41613	0.255707	13.3595	1.04233e-40	4.22716e-39
AAEL004305	4944.74	2.4718	0.185093	13.3543	1.11788e-40	4.51896e-39
AAEL002401	5161.15	1.57313	0.118053	13.3256	1.64291e-40	6.6201e-39
AAEL012041	11255.9	3.20458	0.240863	13.3046	2.17739e-40	8.74573e-39
AAEL008849	10931.2	1.70554	0.128233	13.3003	2.30452e-40	9.22689e-39
AAEL007385	228044	1.87444	0.140951	13.2985	2.36041e-40	9.42064e-39
AAEL013083	4630.74	-2.01738	0.151715	-13.2971	2.40506e-40	9.56849e-39
AAEL001141	4902.23	-1.21855	0.0916509	-13.2956	2.45445e-40	9.73419e-39
AAEL004563	10854.2	1.39801	0.105336	13.2719	3.37028e-40	1.33243e-38
AAEL008931	4495.24	-2.30219	0.173667	-13.2564	4.14378e-40	1.63309e-38
AAEL013992	1297.81	1.59564	0.120437	13.2488	4.58431e-40	1.80106e-38
AAEL012579	5841.41	3.18925	0.240737	13.2478	4.64505e-40	1.81924e-38
AAEL009324	3800.18	1.81835	0.137349	13.2389	5.22901e-40	2.04159e-38
AAEL006372	26344.7	-2.92734	0.221307	-13.2275	6.08817e-40	2.36968e-38
AAEL006611	2507.14	1.52751	0.115705	13.2018	8.56916e-40	3.32505e-38
AAEL012750	4592.58	-1.92521	0.145918	-13.1938	9.52675e-40	3.68524e-38
AAEL014177	3215.72	1.14787	0.0871401	13.1727	1.25951e-39	4.85725e-38
AAEL027783	2317.84	-2.3702	0.180036	-13.1651	1.39302e-39	5.35566e-38
AAEL007484	13678.1	1.46668	0.111537	13.1496	1.70985e-39	6.55372e-38
AAEL001705	3718.72	1.41886	0.108022	13.1349	2.07787e-39	7.9401e-38
AAEL010348	5981.98	-1.61171	0.122821	-13.1225	2.44873e-39	9.32893e-38
AAEL004209	4926.62	-2.95833	0.225581	-13.1143	2.72786e-39	1.03609e-37
AAEL011051	6505.81	-0.988529	0.0754544	-13.101	3.24929e-39	1.23042e-37
AAEL009647	3377.36	1.3042	0.0997234	13.0782	4.38881e-39	1.65694e-37
AAEL008854	11526	-1.19053	0.0911233	-13.0651	5.21129e-39	1.96157e-37
AAEL007432	906924	8.68659	0.664898	13.0645	5.24973e-39	1.97014e-37
AAEL008181	4387.08	1.04144	0.0797191	13.0639	5.29391e-39	1.98081e-37
AAEL012026	33828.6	-1.33792	0.102565	-13.0447	6.81563e-39	2.54261e-37
AAEL010473	2261.62	1.7084	0.132122	12.9304	3.03096e-38	1.12738e-36
AAEL005201	3154.81	1.92515	0.148926	12.9269	3.1746e-38	1.17732e-36
AAEL017445	2377.17	-2.49494	0.193057	-12.9233	3.32437e-38	1.22923e-36
AAEL001690	1.19871e+06	6.22365	0.48204	12.9111	3.89865e-38	1.43736e-36
AAEL026981	116908	9.13294	0.707456	12.9095	3.97637e-38	1.46172e-36
AAEL003959	2339.29	-1.82453	0.14138	-12.9052	4.20974e-38	1.543e-36
AAEL001126	4770.73	-1.21022	0.0938514	-12.8951	4.79704e-38	1.75315e-36
AAEL012409	15873.1	-1.63492	0.126878	-12.8858	5.41245e-38	1.97233e-36
AAEL011319	3507.75	-3.6029	0.279851	-12.8744	6.2742e-38	2.27975e-36
AAEL001968	5516.34	1.08153	0.0841296	12.8555	8.01434e-38	2.90364e-36
AAEL009148	4090.55	-1.62302	0.126304	-12.8501	8.59283e-38	3.10428e-36
AAEL007039	1300.67	4.09003	0.318909	12.8251	1.18667e-37	4.27473e-36
AAEL010966	3242.49	1.57525	0.122886	12.8188	1.28667e-37	4.62171e-36
AAEL010074	897.507	-2.10871	0.164513	-12.818	1.30085e-37	4.65935e-36
AAEL003871	5764.02	1.79209	0.13985	12.8143	1.36321e-37	4.86883e-36
AAEL019932	2602.46	-1.9115	0.149277	-12.8051	1.53538e-37	5.46821e-36
AAEL023347	11363.5	1.3804	0.108068	12.7734	2.30965e-37	8.2025e-36
AAEL020789	27739.4	-2.09889	0.164321	-12.7731	2.31704e-37	8.20559e-36
AAEL002432	1543.29	3.44716	0.269991	12.7677	2.48535e-37	8.77691e-36
AAEL004427	3022.43	1.26581	0.0992656	12.7518	3.04741e-37	1.07017e-35
AAEL013541	2396.31	0.935701	0.0733773	12.7519	3.04175e-37	1.07017e-35
AAEL017064	4757.9	1.39124	0.10959	12.695	6.29912e-37	2.20592e-35
AAEL015137	208.185	6.58048	0.518739	12.6855	7.11322e-37	2.48409e-35
AAEL027016	10398.5	3.09854	0.244294	12.6836	7.28601e-37	2.53739e-35
AAEL006895	3797	-2.15133	0.169676	-12.679	7.73138e-37	2.68505e-35
AAEL008366	1800.58	1.58239	0.124824	12.677	7.93148e-37	2.74696e-35
AAEL013207	2095.23	1.87341	0.148198	12.6413	1.25037e-36	4.31857e-35
AAEL008000	4710.16	1.0263	0.0811912	12.6406	1.26164e-36	4.34558e-35
AAEL004756	1923.32	1.21385	0.0961249	12.6278	1.48304e-36	5.09422e-35
AAEL012266	16345.5	3.55256	0.281559	12.6175	1.69155e-36	5.79446e-35
AAEL006776	3751.94	-1.40761	0.111562	-12.6173	1.69612e-36	5.79446e-35
AAEL007395	2018.25	1.73207	0.137378	12.6081	1.90556e-36	6.49234e-35
AAEL003433	14737.1	1.62531	0.129006	12.5987	2.14769e-36	7.29751e-35
AAEL002898	984.922	3.28407	0.261343	12.5661	3.24203e-36	1.09862e-34
AAEL014961	977.404	2.0039	0.159561	12.5588	3.55465e-36	1.20132e-34
AAEL021925	742.391	-4.65263	0.371626	-12.5196	5.83e-36	1.96501e-34
AAEL001935	1670.21	-1.21632	0.0972496	-12.5072	6.82152e-36	2.29305e-34
AAEL013071	14793.2	1.27892	0.102328	12.4983	7.62888e-36	2.55761e-34
AAEL008569	1005.48	-2.74327	0.219514	-12.497	7.75231e-36	2.59208e-34
AAEL009125	4457.43	-2.0122	0.161138	-12.4875	8.73925e-36	2.91432e-34
AAEL017059	1880.18	1.55739	0.124866	12.4725	1.05483e-35	3.50829e-34
AAEL008028	16595.7	2.49478	0.20022	12.4602	1.23037e-35	4.08131e-34
AAEL007891	4445.96	1.44206	0.115855	12.4471	1.44934e-35	4.79503e-34
AAEL006693	4845.63	1.09596	0.0880998	12.44	1.58525e-35	5.23092e-34
AAEL005830	4605.24	1.72747	0.138876	12.439	1.6059e-35	5.28517e-34
AAEL003039	8266.32	-1.81787	0.146224	-12.4321	1.75074e-35	5.74682e-34
AAEL024455	776.207	-1.94287	0.156391	-12.4231	1.95705e-35	6.4073e-34
AAEL015651	1819.78	1.97309	0.159115	12.4004	2.60061e-35	8.49219e-34
AAEL010008	1946.49	2.76727	0.223175	12.3995	2.62858e-35	8.56126e-34
AAEL020311	1770.97	2.59877	0.20968	12.394	2.81619e-35	9.14862e-34
AAEL008793	4934.94	-1.72966	0.139706	-12.3807	3.3261e-35	1.07773e-33
AAEL000438	1028.14	2.69959	0.218233	12.3702	3.78695e-35	1.2239e-33
AAEL009843	18568	2.43638	0.197128	12.3594	4.33413e-35	1.39715e-33
AAEL006010	896.469	1.28856	0.104351	12.3483	4.97238e-35	1.59879e-33
AAEL026025	176036	8.5633	0.693937	12.3402	5.5035e-35	1.76505e-33
AAEL005455	19803.2	-2.26101	0.183263	-12.3376	5.6858e-35	1.81888e-33
AAEL013236	6734.62	1.45875	0.118335	12.3273	6.45849e-35	2.06082e-33
AAEL000564	6035.36	2.04218	0.165857	12.3129	7.71938e-35	2.45691e-33
AAEL026243	6619.5	0.986222	0.0801462	12.3053	8.48334e-35	2.69325e-33
AAEL020200	1148.95	-5.43002	0.441706	-12.2933	9.84014e-35	3.11613e-33
AAEL009596	10346.6	6.10904	0.498106	12.2645	1.40405e-34	4.43512e-33
AAEL011158	7206.92	2.61689	0.213678	12.2469	1.74463e-34	5.4971e-33
AAEL027784	192.418	3.59479	0.29357	12.2451	1.78522e-34	5.61095e-33
AAEL007792	5945.76	-1.4093	0.115225	-12.2308	2.12906e-34	6.67495e-33
AAEL000934	9908.36	0.953771	0.07799	12.2294	2.16517e-34	6.77126e-33
AAEL010496	3939.43	1.33648	0.109286	12.2292	2.17069e-34	6.77168e-33
AAEL007926	94146.7	2.6079	0.213548	12.2122	2.67406e-34	8.32135e-33
AAEL002430	1287.81	2.10313	0.172367	12.2014	3.05356e-34	9.4555e-33
AAEL004738	5613.12	1.47277	0.120703	12.2015	3.0497e-34	9.4555e-33
AAEL019589	3976.08	-1.195	0.0979733	-12.1973	3.21487e-34	9.93055e-33
AAEL008613	2355.81	1.02621	0.0841818	12.1904	3.49582e-34	1.07719e-32
AAEL007936	4635.49	0.97104	0.0796865	12.1857	3.70242e-34	1.13807e-32
AAEL019652	2593.78	1.52001	0.124808	12.1788	4.03188e-34	1.23631e-32
AAEL000427	17151.4	1.78741	0.14683	12.1733	4.31271e-34	1.31921e-32
AAEL012610	7759.51	1.50923	0.124031	12.1682	4.59135e-34	1.40103e-32
AAEL012279	8138.57	1.4945	0.122932	12.1572	5.2554e-34	1.59978e-32
AAEL027013	9694.43	1.76603	0.145502	12.1375	6.68044e-34	2.02866e-32
AAEL025109	1975.37	4.82191	0.397397	12.1337	6.99733e-34	2.11977e-32
AAEL010078	1272.62	-1.42299	0.117335	-12.1276	7.54251e-34	2.27943e-32
AAEL003789	5611.11	-1.49537	0.123464	-12.1118	9.14751e-34	2.75785e-32
AAEL010300	7040.05	1.26082	0.104266	12.0923	1.16041e-33	3.49011e-32
AAEL012105	1268.52	1.13289	0.0937196	12.0881	1.22149e-33	3.66507e-32
AAEL013470	1174.59	1.13889	0.094375	12.0677	1.5645e-33	4.68306e-32
AAEL002464	6999.55	1.54874	0.128368	12.0649	1.61823e-33	4.83239e-32
AAEL000859	314241	3.91179	0.324874	12.0409	2.16463e-33	6.44874e-32
AAEL012062	177855	-2.21745	0.184334	-12.0295	2.48519e-33	7.38624e-32
AAEL026825	6676.86	-4.34876	0.361607	-12.0262	2.58782e-33	7.67313e-32
AAEL002819	2044.3	2.32901	0.193738	12.0214	2.74191e-33	8.11088e-32
AAEL003491	2175.74	1.6589	0.138075	12.0145	2.98137e-33	8.79854e-32
AAEL007062	1667.21	-1.52064	0.1266	-12.0114	3.09571e-33	9.11457e-32
AAEL021113	7097.83	-0.911523	0.0759648	-11.9993	3.58384e-33	1.05271e-31
AAEL009486	4866.31	-1.42651	0.119094	-11.978	4.63288e-33	1.35768e-31
AAEL025122	2231.17	1.52604	0.12742	11.9764	4.72173e-33	1.3805e-31
AAEL005950	4340.1	-1.89754	0.158476	-11.9737	4.88321e-33	1.4244e-31
AAEL009968	9620.05	2.85556	0.239359	11.93	8.25314e-33	2.40182e-31
AAEL026984	1067.37	3.00302	0.25184	11.9243	8.84189e-33	2.5613e-31
AAEL022462	3200.33	-1.20392	0.100963	-11.9243	8.83908e-33	2.5613e-31
AAEL022914	580.45	-2.22227	0.186518	-11.9146	9.93951e-33	2.87263e-31
AAEL004985	5820.27	1.11732	0.0939079	11.8981	1.2113e-32	3.49276e-31
AAEL026023	20032.5	4.48876	0.377287	11.8974	1.22031e-32	3.51071e-31
AAEL023746	1555.87	2.87641	0.241799	11.8959	1.24367e-32	3.56973e-31
AAEL005069	20242.5	1.05757	0.0890759	11.8727	1.64141e-32	4.70064e-31
AAEL001674	127999	7.30251	0.615284	11.8685	1.72481e-32	4.92826e-31
AAEL020615	1509.37	-2.25362	0.190062	-11.8573	1.97204e-32	5.62187e-31
AAEL000703	4000.43	-1.88467	0.158997	-11.8535	2.06295e-32	5.86774e-31
AAEL003676	5087.22	-1.88391	0.158942	-11.8528	2.08128e-32	5.9065e-31
AAEL006805	7549.1	-2.8926	0.244228	-11.8438	2.31611e-32	6.55815e-31
AAEL015100	12868.7	1.32232	0.111818	11.8257	2.87489e-32	8.12206e-31
AAEL009016	522.09	2.17891	0.184589	11.8041	3.71616e-32	1.04752e-30
AAEL003763	2102.99	3.17022	0.268903	11.7894	4.42485e-32	1.2445e-30
AAEL021016	3891.81	-1.15858	0.0982762	-11.789	4.44603e-32	1.24767e-30
AAEL000795	17144.4	-1.46242	0.124296	-11.7656	5.87009e-32	1.64363e-30
AAEL010504	603.729	1.92428	0.16364	11.7592	6.33041e-32	1.76858e-30
AAEL019458	5044.67	3.17254	0.270067	11.7472	7.29843e-32	2.0345e-30
AAEL000851	4557.04	-2.44101	0.208149	-11.7272	9.24312e-32	2.5709e-30
AAEL007019	17237.4	-1.65298	0.141	-11.7233	9.68104e-32	2.68676e-30
AAEL009589	263.08	2.39014	0.204073	11.7121	1.10447e-31	3.05845e-30
AAEL003550	22977.4	-2.76603	0.236201	-11.7105	1.12665e-31	3.11303e-30
AAEL001581	4821.41	-1.01292	0.086533	-11.7056	1.19382e-31	3.29139e-30
AAEL001699	6124.75	2.79515	0.238855	11.7023	1.24093e-31	3.41377e-30
AAEL000915	22426.1	-1.913	0.163475	-11.702	1.24424e-31	3.41541e-30
AAEL006516	23304.6	1.1879	0.101564	11.6961	1.33403e-31	3.65392e-30
AAEL027222	53326.2	8.71105	0.745096	11.6912	1.41411e-31	3.86482e-30
AAEL002324	1773.45	1.21837	0.104339	11.677	1.67044e-31	4.55547e-30
AAEL021319	1359.63	5.50653	0.471642	11.6752	1.70635e-31	4.64334e-30
AAEL012460	1467.96	1.10596	0.0947355	11.6741	1.72812e-31	4.69244e-30
AAEL013121	2393.22	1.49723	0.128423	11.6586	2.07507e-31	5.62237e-30
AAEL025134	15864.4	1.64016	0.140803	11.6487	2.33087e-31	6.30187e-30
AAEL003907	3363.66	1.14976	0.0989059	11.6248	3.08255e-31	8.31628e-30
AAEL000444	11302.2	1.17212	0.10085	11.6224	3.1707e-31	8.53576e-30
AAEL000291	273982	1.53699	0.132377	11.6107	3.6371e-31	9.77044e-30
AAEL011081	2810.2	2.46357	0.212227	11.6081	3.74675e-31	1.00435e-29
AAEL009766	1077.42	1.50661	0.129899	11.5984	4.19979e-31	1.1234e-29
AAEL012482	2558.25	-3.45685	0.298137	-11.5948	4.37805e-31	1.1686e-29
AAEL012427	3519.2	1.43347	0.123712	11.5871	4.79088e-31	1.27608e-29
AAEL010591	2166.6	2.76697	0.238985	11.578	5.32686e-31	1.41584e-29
AAEL014050	681.324	1.833	0.158543	11.5615	6.45578e-31	1.71228e-29
AAEL024525	4537.27	1.2806	0.110827	11.555	6.96309e-31	1.84295e-29
AAEL006412	4108.12	-1.41211	0.122308	-11.5455	7.78275e-31	2.05556e-29
AAEL024195	7046.63	-0.997883	0.086525	-11.5329	9.00807e-31	2.3742e-29
AAEL004479	1541.76	2.84136	0.246555	11.5243	9.95754e-31	2.61896e-29
AAEL014891	5477.87	-1.91984	0.166616	-11.5225	1.01614e-30	2.667e-29
AAEL002137	3280.95	-0.965179	0.0839245	-11.5006	1.31047e-30	3.43234e-29
AAEL000574	3596.67	0.931782	0.081048	11.4967	1.37107e-30	3.58359e-29
AAEL027839	11705.8	1.72364	0.150084	11.4845	1.57838e-30	4.11688e-29
AAEL001194	25768.6	2.37251	0.206605	11.4833	1.60059e-30	4.16617e-29
AAEL007078	24704.5	0.88776	0.0773602	11.4757	1.74811e-30	4.54075e-29
AAEL023441	4279.91	-2.2558	0.196634	-11.4721	1.82193e-30	4.72274e-29
AAEL008723	24957.5	1.61653	0.141178	11.4503	2.3429e-30	6.06068e-29
AAEL003418	14107.1	1.76452	0.154265	11.4383	2.69235e-30	6.95035e-29
AAEL001177	2069.28	1.64008	0.143389	11.4379	2.70208e-30	6.96117e-29
AAEL007987	6059.64	1.14192	0.099888	11.432	2.89499e-30	7.44291e-29
AAEL027060	2876.79	2.94096	0.257456	11.4232	3.2039e-30	8.22029e-29
AAEL022296	1397.53	-3.31134	0.289995	-11.4186	3.3761e-30	8.64447e-29
AAEL020112	378.942	-3.58687	0.314388	-11.409	3.76873e-30	9.63018e-29
AAEL000428	29674.8	1.39438	0.12231	11.4004	4.16189e-30	1.06132e-28
AAEL006815	6945.82	-1.8531	0.162641	-11.3938	4.48802e-30	1.14217e-28
AAEL009879	1411.26	1.44963	0.12727	11.3902	4.68165e-30	1.18905e-28
AAEL009422	21481.8	-0.796357	0.0699321	-11.3876	4.82183e-30	1.22218e-28
AAEL015275	577.331	1.44845	0.127248	11.3829	5.088e-30	1.28705e-28
AAEL012994	8628.25	-1.41531	0.124371	-11.3797	5.27884e-30	1.33024e-28
AAEL010582	5406.01	2.90032	0.254869	11.3797	5.27991e-30	1.33024e-28
AAEL009957	599.6	1.87551	0.165047	11.3635	6.35671e-30	1.59833e-28
AAEL001649	6237.77	1.4108	0.124202	11.3589	6.69681e-30	1.68048e-28
AAEL003377	4369.07	1.33505	0.117549	11.3574	6.81289e-30	1.70621e-28
AAEL001898	7544.45	-1.88402	0.165991	-11.3501	7.40396e-30	1.85055e-28
AAEL013279	16303	1.37159	0.121061	11.3297	9.34894e-30	2.33204e-28
AAEL001484	15913.9	-0.848094	0.074878	-11.3263	9.7178e-30	2.41925e-28
AAEL002183	3688.74	1.38579	0.122402	11.3216	1.02585e-29	2.5488e-28
AAEL006337	1981.73	1.08405	0.0957891	11.317	1.0809e-29	2.6803e-28
AAEL009367	5226.35	-1.24491	0.110108	-11.3062	1.22251e-29	3.02546e-28
AAEL000944	12958.9	1.0641	0.0944579	11.2653	1.9464e-29	4.80748e-28
AAEL009420	5552.01	-1.80104	0.159878	-11.2651	1.95154e-29	4.81075e-28
AAEL002161	2081.32	1.32585	0.11772	11.2627	2.00414e-29	4.93072e-28
AAEL006238	2497.58	-2.69723	0.239962	-11.2402	2.58805e-29	6.35486e-28
AAEL006373	1262.08	1.30987	0.116652	11.2288	2.9437e-29	7.21408e-28
AAEL009105	4750.95	-1.61831	0.144262	-11.2178	3.3343e-29	8.1554e-28
AAEL004697	5705.97	1.19828	0.106962	11.2029	3.94512e-29	9.6307e-28
AAEL022091	5155.72	0.78386	0.0700229	11.1943	4.34592e-29	1.05886e-27
AAEL008693	10764.5	2.58065	0.230573	11.1924	4.44458e-29	1.07986e-27
AAEL006677	2355.34	1.07406	0.0959642	11.1923	4.44932e-29	1.07986e-27
AAEL008379	5906.68	0.959756	0.0857626	11.1908	4.52128e-29	1.09521e-27
AAEL023991	15844.4	-1.95106	0.174412	-11.1865	4.74965e-29	1.14832e-27
AAEL010087	4794.27	1.66488	0.148881	11.1826	4.96218e-29	1.1974e-27
AAEL005177	10382.4	-1.9442	0.173889	-11.1807	5.06663e-29	1.22026e-27
AAEL025594	6140.1	1.37631	0.123252	11.1667	5.93608e-29	1.42693e-27
AAEL022280	437.719	-4.02816	0.361252	-11.1505	7.11676e-29	1.70748e-27
AAEL009042	1548.59	1.19209	0.106932	11.1481	7.31662e-29	1.75209e-27
AAEL005730	1590.16	1.00579	0.0902312	11.1469	7.41838e-29	1.77308e-27
AAEL019461	9552.75	-2.01169	0.18051	-11.1445	7.61681e-29	1.81705e-27
AAEL008738	18972.7	-1.4204	0.127501	-11.1404	7.9796e-29	1.89999e-27
AAEL007051	343.807	10.2099	0.916979	11.1343	8.54152e-29	2.02994e-27
AAEL001859	2710.76	1.05342	0.0946164	11.1336	8.61348e-29	2.04318e-27
AAEL008428	21393	-2.08544	0.187479	-11.1236	9.63427e-29	2.28102e-27
AAEL008425	4496.33	1.31069	0.11809	11.099	1.26791e-28	2.99627e-27
AAEL010047	10760.8	1.85023	0.167086	11.0735	1.68733e-28	3.97995e-27
AAEL011395	5041.4	1.3857	0.125191	11.0687	1.77929e-28	4.18899e-27
AAEL007306	5767.79	-1.05081	0.0950522	-11.0551	2.07153e-28	4.8679e-27
AAEL006433	5180.62	-1.11352	0.100757	-11.0515	2.15485e-28	5.05426e-27
AAEL021836	2047.66	-1.75949	0.159269	-11.0473	2.25982e-28	5.2906e-27
AAEL009039	1015.08	0.956947	0.0866399	11.0451	2.31489e-28	5.40944e-27
AAEL000589	8735.52	1.18226	0.107151	11.0335	2.633e-28	6.1414e-27
AAEL011972	6740.78	0.866794	0.0785911	11.0292	2.76439e-28	6.43591e-27
AAEL026894	3864.51	-1.0173	0.0922923	-11.0226	2.97407e-28	6.91127e-27
AAEL006550	5211.44	1.33183	0.121036	11.0036	3.67373e-28	8.52142e-27
AAEL000234	5877.37	-1.66146	0.151177	-10.9901	4.26332e-28	9.87079e-27
AAEL007444	16421.1	-2.23466	0.203345	-10.9895	4.2914e-28	9.91756e-27
AAEL000709	19749.2	2.26139	0.20625	10.9643	5.67375e-28	1.30881e-26
AAEL010485	4941.13	3.27349	0.298604	10.9626	5.77878e-28	1.3306e-26
AAEL020846	6173.63	-2.66041	0.242885	-10.9534	6.39929e-28	1.47078e-26
AAEL024775	1260.07	1.54791	0.14139	10.9478	6.80635e-28	1.56149e-26
AAEL019445	1349.74	-1.94208	0.177489	-10.9419	7.26388e-28	1.66341e-26
AAEL013818	2193.32	1.0566	0.0966255	10.935	7.83893e-28	1.79184e-26
AAEL007322	7140.84	-1.67732	0.15341	-10.9336	7.96429e-28	1.81719e-26
AAEL001317	1667.48	0.914242	0.0837302	10.9189	9.36157e-28	2.13213e-26
AAEL004406	1594.98	1.57169	0.143979	10.9161	9.65269e-28	2.19446e-26
AAEL007501	5594.22	0.846982	0.0776851	10.9028	1.11809e-27	2.5373e-26
AAEL007022	5901.23	-0.68827	0.0631497	-10.899	1.16491e-27	2.63878e-26
AAEL003536	2501.18	1.19722	0.109891	10.8946	1.22335e-27	2.76617e-26
AAEL017462	8277.61	1.20245	0.110464	10.8855	1.35207e-27	3.05175e-26
AAEL024953	10120.6	2.4766	0.227556	10.8835	1.38186e-27	3.1134e-26
AAEL025391	12763.4	-1.37147	0.126104	-10.8757	1.50496e-27	3.38468e-26
AAEL000208	4791.03	1.28857	0.118517	10.8725	1.55907e-27	3.50011e-26
AAEL012227	10839.2	1.56202	0.143715	10.8689	1.62216e-27	3.63527e-26
AAEL013966	10021.7	-1.50937	0.13906	-10.8541	1.90685e-27	4.26565e-26
AAEL014557	3490.26	-1.46836	0.135288	-10.8535	1.91857e-27	4.28423e-26
AAEL016982	3394.82	0.746802	0.0688381	10.8487	2.02347e-27	4.51047e-26
AAEL013320	13008.9	1.87948	0.173254	10.8481	2.03531e-27	4.52883e-26
AAEL002978	36823.7	1.76795	0.163017	10.8452	2.10158e-27	4.66804e-26
AAEL014715	8972.15	0.866105	0.0798669	10.8444	2.1213e-27	4.70353e-26
AAEL010359	11901.1	-1.21233	0.111811	-10.8427	2.15996e-27	4.7808e-26
AAEL008052	305.083	-2.93259	0.270488	-10.8419	2.17974e-27	4.8161e-26
AAEL000175	22641.2	0.724058	0.0667895	10.8409	2.20307e-27	4.85913e-26
AAEL004727	3481.06	-1.22556	0.113052	-10.8407	2.20745e-27	4.86026e-26
AAEL002428	4872.27	-1.54598	0.142685	-10.8349	2.352e-27	5.16947e-26
AAEL001656	96717.6	3.58812	0.331305	10.8303	2.47432e-27	5.42883e-26
AAEL027460	2279.84	2.89183	0.26704	10.8292	2.50348e-27	5.48324e-26
AAEL013249	10333.8	1.22265	0.112911	10.8284	2.52514e-27	5.52105e-26
AAEL008679	2984.26	-1.67634	0.154814	-10.8281	2.53469e-27	5.53231e-26
AAEL002645	6443.28	0.890822	0.0823992	10.811	3.05174e-27	6.64931e-26
AAEL005174	11851.7	-1.52691	0.141292	-10.8068	3.19677e-27	6.95324e-26
AAEL010373	6678.24	-1.37804	0.127613	-10.7986	3.49542e-27	7.58972e-26
AAEL000905	9503.25	-2.07853	0.192512	-10.7969	3.56106e-27	7.71891e-26
AAEL018707	333.51	1.67731	0.155443	10.7905	3.81542e-27	8.25601e-26
AAEL010196	839836	3.91124	0.364018	10.7446	6.2812e-27	1.35683e-25
AAEL001855	374.31	3.96061	0.368749	10.7407	6.55745e-27	1.41407e-25
AAEL005822	10803.4	1.56815	0.146041	10.7377	6.77042e-27	1.4575e-25
AAEL012262	10849.6	1.22641	0.114417	10.7188	8.30777e-27	1.78539e-25
AAEL000752	6204.2	-1.45456	0.135745	-10.7154	8.62053e-27	1.84944e-25
AAEL020441	6790.01	2.88653	0.269546	10.7089	9.24924e-27	1.98094e-25
AAEL000622	4573	-0.953514	0.089052	-10.7074	9.39905e-27	2.00961e-25
AAEL019463	19862.6	2.67807	0.250193	10.704	9.7447e-27	2.07997e-25
AAEL023611	1463.67	-1.35212	0.126539	-10.6853	1.192e-26	2.53997e-25
AAEL003097	1484.58	-2.39263	0.224176	-10.673	1.36156e-26	2.89637e-25
AAEL006226	16010.2	2.39789	0.22488	10.663	1.51607e-26	3.2196e-25
AAEL022600	156648	3.77839	0.354523	10.6577	1.60572e-26	3.40423e-25
AAEL009913	3558.58	0.781428	0.07346	10.6375	1.9949e-26	4.2222e-25
AAEL010243	2314.56	2.13528	0.200785	10.6347	2.05543e-26	4.343e-25
AAEL003909	1361.04	2.99803	0.282801	10.6012	2.94127e-26	6.20431e-25
AAEL018248	272.996	-2.63156	0.24843	-10.5928	3.21843e-26	6.77758e-25
AAEL012437	1218.41	1.20206	0.113497	10.591	3.27918e-26	6.89396e-25
AAEL013967	2059.05	1.47567	0.139512	10.5774	3.79374e-26	7.96241e-25
AAEL007114	6654.46	3.98442	0.376718	10.5767	3.82337e-26	8.01123e-25
AAEL021386	4412.79	1.22612	0.115947	10.5748	3.89859e-26	8.15525e-25
AAEL013982	4916.76	1.53154	0.145134	10.5525	4.94375e-26	1.03244e-24
AAEL011985	6868.35	-1.44683	0.137151	-10.5492	5.12366e-26	1.06824e-24
AAEL008591	2216.98	-1.56004	0.147888	-10.5488	5.14487e-26	1.07088e-24
AAEL003774	1987.42	1.08529	0.103054	10.5313	6.19448e-26	1.28722e-24
AAEL022930	2415.19	-1.93456	0.183839	-10.5231	6.75967e-26	1.40235e-24
AAEL003383	5382.21	0.846093	0.0804814	10.5129	7.53378e-26	1.56037e-24
AAEL006912	7147.97	2.1967	0.208967	10.5122	7.58936e-26	1.5693e-24
AAEL011732	1842.15	-1.21189	0.115467	-10.4955	9.05604e-26	1.8695e-24
AAEL004023	6916.51	1.6617	0.158359	10.4933	9.27606e-26	1.91178e-24
AAEL005471	20054.2	1.51986	0.144935	10.4865	9.96345e-26	2.05009e-24
AAEL000842	798.001	-3.18746	0.304003	-10.485	1.01288e-25	2.08072e-24
AAEL013304	9472.97	3.91259	0.373193	10.4841	1.02202e-25	2.09606e-24
AAEL005188	18251.3	5.56472	0.530909	10.4815	1.05068e-25	2.15133e-24
AAEL018216	289.223	-3.68761	0.352454	-10.4627	1.28192e-25	2.62053e-24
AAEL005985	9883.3	-2.01731	0.19288	-10.4589	1.33444e-25	2.72346e-24
AAEL024692	765.543	1.96522	0.18805	10.4505	1.45748e-25	2.96976e-24
AAEL023114	1056.79	-2.08611	0.19968	-10.4473	1.50785e-25	3.06742e-24
AAEL012674	3433.79	2.136	0.20459	10.4404	1.62191e-25	3.29412e-24
AAEL027408	5678.69	-1.46749	0.140641	-10.4343	1.72793e-25	3.5038e-24
AAEL027229	818.387	7.23434	0.693458	10.4323	1.76624e-25	3.57572e-24
AAEL022979	7558.46	-1.60181	0.153597	-10.4287	1.83472e-25	3.70837e-24
AAEL018139	4236.98	-1.91063	0.183231	-10.4274	1.85889e-25	3.7512e-24
AAEL013729	1729.63	-1.34387	0.128893	-10.4263	1.8814e-25	3.79054e-24
AAEL024853	5642.32	1.17587	0.112813	10.4232	1.94314e-25	3.90867e-24
AAEL022928	1042.85	-1.63481	0.156961	-10.4154	2.10955e-25	4.23663e-24
AAEL017508	2362.63	1.59106	0.153158	10.3884	2.80126e-25	5.61682e-24
AAEL011171	1319.41	1.54353	0.148747	10.3769	3.15717e-25	6.31671e-24
AAEL006717	2096.31	0.88756	0.0855327	10.3768	3.16036e-25	6.31671e-24
AAEL008700	865.057	1.24819	0.120472	10.3608	3.73954e-25	7.46246e-24
AAEL012940	2688.02	-1.59178	0.153719	-10.3551	3.96749e-25	7.90479e-24
AAEL019606	1436.86	-2.45068	0.236934	-10.3433	4.48784e-25	8.92739e-24
AAEL008084	5876.23	-0.99386	0.0961432	-10.3373	4.7785e-25	9.49057e-24
AAEL011004	468.864	3.2641	0.315829	10.335	4.89375e-25	9.70414e-24
AAEL003509	5130.57	0.852481	0.0825266	10.3298	5.16851e-25	1.02328e-23
AAEL010926	1335.3	-1.59131	0.154055	-10.3295	5.18522e-25	1.02498e-23
AAEL021600	1425.27	1.47983	0.143315	10.3257	5.39175e-25	1.06413e-23
AAEL007356	1367.9	1.64545	0.159861	10.293	7.57702e-25	1.49308e-23
AAEL011754	710.927	1.21545	0.118088	10.2928	7.59575e-25	1.49442e-23
AAEL006001	1354.27	2.24748	0.218366	10.2923	7.63675e-25	1.50014e-23
AAEL002349	5478.43	1.09058	0.105986	10.2899	7.82855e-25	1.53542e-23
AAEL001906	4435.6	-1.49858	0.145826	-10.2765	8.98924e-25	1.76032e-23
AAEL023132	485.133	3.46	0.336848	10.2717	9.45285e-25	1.84823e-23
AAEL005515	57473.6	0.840821	0.081951	10.26	1.06659e-24	2.08218e-23
AAEL005861	10719.6	-1.88515	0.183748	-10.2594	1.07382e-24	2.09303e-23
AAEL003945	2351.17	1.22541	0.119493	10.2551	1.12298e-24	2.18547e-23
AAEL009387	20922.3	1.26474	0.123387	10.2501	1.1818e-24	2.29638e-23
AAEL004509	1952.54	1.52195	0.148806	10.2277	1.4895e-24	2.88981e-23
AAEL006630	2740.65	2.45385	0.23996	10.2261	1.51512e-24	2.93499e-23
AAEL024179	3786.85	2.07598	0.203569	10.1979	2.02609e-24	3.91878e-23
AAEL027429	833.595	1.92432	0.188705	10.1975	2.0337e-24	3.92745e-23
AAEL000649	387.282	-2.64831	0.260258	-10.1757	2.54563e-24	4.90853e-23
AAEL014207	576.742	4.19508	0.412294	10.175	2.56428e-24	4.93692e-23
AAEL002834	9286.98	-1.47944	0.145404	-10.1747	2.57122e-24	4.94272e-23
AAEL004148	9721.39	1.43641	0.141285	10.1667	2.7918e-24	5.35855e-23
AAEL025437	3578.88	1.51919	0.149613	10.1542	3.17524e-24	6.08523e-23
AAEL006137	579.743	6.24835	0.615391	10.1535	3.19803e-24	6.11957e-23
AAEL012161	4793.7	1.19254	0.117493	10.1499	3.31699e-24	6.33756e-23
AAEL010340	10050.8	0.968233	0.0955402	10.1343	3.89163e-24	7.42422e-23
AAEL026520	763.063	-1.34105	0.132656	-10.1093	5.0254e-24	9.57263e-23
AAEL002083	53968.9	-0.732626	0.0724975	-10.1055	5.22078e-24	9.92975e-23
AAEL001503	19207.1	-2.50964	0.248377	-10.1042	5.29507e-24	1.00558e-22
AAEL007441	17437.6	1.34197	0.132937	10.0948	5.82607e-24	1.10476e-22
AAEL011527	15201.7	1.59175	0.157698	10.0937	5.89277e-24	1.11572e-22
AAEL013076	6101.25	1.07349	0.10639	10.0901	6.10931e-24	1.15498e-22
AAEL014414	2781.14	0.923606	0.0915631	10.0871	6.30081e-24	1.1894e-22
AAEL010653	49989.5	4.71472	0.467415	10.0868	6.31944e-24	1.19112e-22
AAEL004234	1915.76	0.912692	0.0904957	10.0855	6.40553e-24	1.20554e-22
AAEL004692	639.766	-3.38202	0.33573	-10.0736	7.22736e-24	1.35818e-22
AAEL008827	576.046	-2.30262	0.228585	-10.0734	7.24547e-24	1.35955e-22
AAEL002467	574033	4.8655	0.483401	10.0652	7.87638e-24	1.47574e-22
AAEL018267	11296.4	1.88106	0.187045	10.0567	8.58071e-24	1.60531e-22
AAEL007476	2814.75	-0.997419	0.0992631	-10.0482	9.35327e-24	1.74724e-22
AAEL008330	17574.8	2.10079	0.209229	10.0406	1.01018e-23	1.88428e-22
AAEL010284	5527.47	2.09866	0.209109	10.0362	1.05672e-23	1.96525e-22
AAEL010576	8848.58	-0.766305	0.0763534	-10.0363	1.0558e-23	1.96525e-22
AAEL001405	948.841	0.91784	0.0915082	10.0301	1.12356e-23	2.08646e-22
AAEL008271	3274.93	2.39181	0.238471	10.0298	1.1275e-23	2.09069e-22
AAEL021072	1680.33	1.62157	0.161766	10.0242	1.19314e-23	2.20915e-22
AAEL027762	8318.97	-2.73802	0.273146	-10.024	1.1953e-23	2.2099e-22
AAEL019804	379.629	-2.12502	0.212054	-10.0211	1.23089e-23	2.27235e-22
AAEL007731	5804.49	-1.36166	0.135971	-10.0144	1.31816e-23	2.42991e-22
AAEL012323	1482.48	1.36141	0.136014	10.0093	1.38677e-23	2.55263e-22
AAEL023729	436972	4.52183	0.451769	10.0091	1.38945e-23	2.55383e-22
AAEL008828	8871.93	-1.24207	0.124138	-10.0056	1.44056e-23	2.64389e-22
AAEL004092	21993.8	2.92889	0.292964	9.99743	1.56411e-23	2.86647e-22
AAEL001114	1575.05	0.931392	0.0931691	9.99679	1.57416e-23	2.88068e-22
AAEL004193	2587.61	-2.21466	0.22181	-9.98449	1.78222e-23	3.2567e-22
AAEL009646	20055.2	0.792655	0.0794018	9.98283	1.81221e-23	3.30669e-22
AAEL008707	1907.68	-0.894615	0.0896291	-9.9813	1.84038e-23	3.35322e-22
AAEL008530	1088.95	-1.46484	0.146939	-9.96909	2.0812e-23	3.78652e-22
AAEL007915	27960	1.18396	0.118893	9.95822	2.32191e-23	4.21836e-22
AAEL001657	1135.14	0.908674	0.0912806	9.95473	2.40465e-23	4.36238e-22
AAEL006641	1560.92	1.00321	0.100881	9.94457	2.66331e-23	4.82466e-22
AAEL013715	241439	5.45681	0.548909	9.9412	2.75479e-23	4.9832e-22
AAEL012439	2754.34	1.17878	0.118654	9.93466	2.94181e-23	5.31114e-22
AAEL014913	29595.6	-0.823847	0.0829273	-9.93457	2.94453e-23	5.31114e-22
AAEL005023	2222.77	-1.0853	0.109326	-9.92716	3.17152e-23	5.71236e-22
AAEL001350	929.346	1.17602	0.118632	9.91312	3.65048e-23	6.56564e-22
AAEL007120	265.306	-6.57291	0.663308	-9.90929	3.79347e-23	6.81307e-22
AAEL004228	5512.98	1.32353	0.133649	9.90299	4.04e-23	7.24549e-22
AAEL024852	1951.59	-1.15729	0.116879	-9.90159	4.09695e-23	7.33715e-22
AAEL003926	544.881	1.52416	0.153996	9.89739	4.27297e-23	7.6415e-22
AAEL012099	19502.7	-1.19109	0.120355	-9.89648	4.31195e-23	7.70025e-22
AAEL015236	1016.11	1.57986	0.159673	9.89435	4.40455e-23	7.85447e-22
AAEL003347	6240.5	-2.56623	0.259576	-9.88627	4.77485e-23	8.50275e-22
AAEL002178	20816.5	-1.43784	0.14544	-9.88612	4.78201e-23	8.50346e-22
AAEL013640	324.297	2.5892	0.261929	9.88513	4.82947e-23	8.57573e-22
AAEL007758	10554.4	-2.80626	0.284114	-9.87724	5.22508e-23	9.26513e-22
AAEL026088	498.624	2.22777	0.225612	9.87433	5.37906e-23	9.52472e-22
AAEL011519	1370.12	-3.11694	0.315735	-9.872	5.50581e-23	9.73545e-22
AAEL013253	3426.11	-1.34993	0.136756	-9.8711	5.55542e-23	9.80937e-22
AAEL006519	10442.5	0.847274	0.0858439	9.86994	5.62003e-23	9.90954e-22
AAEL018120	2094.28	-2.83684	0.287659	-9.86181	6.09383e-23	1.07299e-21
AAEL001570	948.294	-1.76251	0.178801	-9.85735	6.37105e-23	1.12024e-21
AAEL005874	5251.08	-1.74379	0.176964	-9.85392	6.59244e-23	1.15754e-21
AAEL005976	1514.19	1.03071	0.10474	9.84072	7.51679e-23	1.31801e-21
AAEL009829	2743.55	1.32799	0.13506	9.83263	8.14667e-23	1.42646e-21
AAEL010602	3757.35	-2.0513	0.208731	-9.82748	8.57332e-23	1.49908e-21
AAEL014345	8696.99	1.07059	0.108941	9.82717	8.59983e-23	1.50163e-21
AAEL022570	102989	-1.36953	0.139416	-9.8233	8.93716e-23	1.55836e-21
AAEL013063	7568.73	2.5781	0.262486	9.82185	9.06638e-23	1.57871e-21
AAEL001312	2241.89	-1.27964	0.130404	-9.81294	9.90422e-23	1.72221e-21
AAEL008696	6278.33	-1.47069	0.149961	-9.80718	1.04854e-22	1.82075e-21
AAEL023595	5585.69	1.87505	0.191269	9.80321	1.09068e-22	1.89132e-21
AAEL004313	10702.2	1.402	0.143034	9.80187	1.10518e-22	1.91382e-21
AAEL011133	2606.13	-1.34559	0.137322	-9.79881	1.13915e-22	1.96993e-21
AAEL007601	123585	6.30978	0.644048	9.79706	1.1591e-22	2.00167e-21
AAEL007472	1197.81	1.41883	0.144844	9.7956	1.17602e-22	2.02811e-21
AAEL003524	22372.5	2.26904	0.231646	9.79529	1.17954e-22	2.03139e-21
AAEL008624	3167.74	-1.2042	0.122945	-9.7946	1.18766e-22	2.04257e-21
AAEL027034	4016.86	0.932544	0.0952402	9.7915	1.22465e-22	2.10332e-21
AAEL021342	24240.6	1.09999	0.112451	9.78194	1.34602e-22	2.30861e-21
AAEL021703	2024.7	-1.38681	0.141831	-9.77789	1.40095e-22	2.39955e-21
AAEL011251	1105.88	1.11756	0.114319	9.77574	1.43104e-22	2.44776e-21
AAEL006069	4349.89	-1.54573	0.158137	-9.77462	1.44699e-22	2.47168e-21
AAEL013107	489.15	-1.74679	0.178773	-9.77101	1.4995e-22	2.55789e-21
AAEL019416	759.133	-1.99925	0.204784	-9.76271	1.62743e-22	2.77236e-21
AAEL003695	709.566	1.62196	0.166184	9.76	1.67157e-22	2.84371e-21
AAEL012539	927.696	-1.2082	0.12389	-9.75217	1.80558e-22	3.06754e-21
AAEL021029	477.976	-3.49909	0.359157	-9.74251	1.98584e-22	3.36924e-21
AAEL011637	942.324	0.887836	0.0912063	9.73437	2.15146e-22	3.6453e-21
AAEL009111	580.68	7.84738	0.806914	9.72518	2.35497e-22	3.98474e-21
AAEL007202	2299.6	1.324	0.136203	9.72076	2.45946e-22	4.15597e-21
AAEL010227	1526.3	0.99408	0.102282	9.71904	2.50124e-22	4.22088e-21
AAEL001501	3303.38	0.947967	0.0976151	9.71127	2.69963e-22	4.54956e-21
AAEL004083	7142.88	2.34094	0.241263	9.70287	2.93137e-22	4.9335e-21
AAEL024337	1473.42	1.44795	0.149384	9.69279	3.23565e-22	5.43832e-21
AAEL002416	5698.19	1.60127	0.165437	9.67906	3.70116e-22	6.21241e-21
AAEL012737	3539.37	5.23505	0.541061	9.67552	3.8314e-22	6.42246e-21
AAEL001615	753.972	1.48517	0.153551	9.67216	3.95919e-22	6.62783e-21
AAEL011382	1567.35	1.31154	0.135664	9.6675	4.14365e-22	6.92739e-21
AAEL009531	28780.1	2.15974	0.22341	9.66718	4.15685e-22	6.94022e-21
AAEL011873	6632.74	0.850663	0.088006	9.66596	4.20651e-22	7.01382e-21
AAEL025199	2888.49	-1.66283	0.172215	-9.65559	4.65482e-22	7.75105e-21
AAEL007634	605.058	1.83824	0.190711	9.63885	5.47994e-22	9.11294e-21
AAEL021826	888.359	-1.72022	0.178537	-9.63512	5.68244e-22	9.4372e-21
AAEL005092	3580	1.26	0.130868	9.62803	6.08868e-22	1.00985e-20
AAEL019512	4127.25	-1.00004	0.104087	-9.6077	7.41896e-22	1.22887e-20
AAEL006685	9115.54	-0.8526	0.0887802	-9.60349	7.72798e-22	1.27837e-20
AAEL024618	13723.3	-1.43597	0.14953	-9.60319	7.75043e-22	1.2804e-20
AAEL010095	5405.03	1.59129	0.165724	9.602	7.84067e-22	1.29361e-20
AAEL006342	16804.8	1.42746	0.149101	9.57377	1.03082e-21	1.69848e-20
AAEL003206	2963.1	1.30816	0.1367	9.56951	1.07417e-21	1.7676e-20
AAEL023310	1042.11	-2.17104	0.226914	-9.5677	1.0931e-21	1.7964e-20
AAEL007191	45772.2	3.39936	0.35537	9.56567	1.11473e-21	1.82955e-20
AAEL027335	5363.13	1.84947	0.193378	9.56401	1.13286e-21	1.85688e-20
AAEL008022	3678.97	2.8436	0.297345	9.56329	1.14068e-21	1.86727e-20
AAEL002544	743.121	1.64312	0.171872	9.56014	1.17594e-21	1.92248e-20
AAEL008594	4624.96	1.19132	0.124621	9.55956	1.18263e-21	1.93092e-20
AAEL001519	1974.86	2.11439	0.221315	9.55375	1.25087e-21	2.03968e-20
AAEL009510	39602.2	1.39832	0.146515	9.54384	1.37633e-21	2.24135e-20
AAEL012912	866.449	0.946504	0.0992302	9.53847	1.44955e-21	2.35754e-20
AAEL001710	1572.94	2.65923	0.279047	9.52966	1.57802e-21	2.56316e-20
AAEL017213	5546.79	0.714253	0.0749704	9.52713	1.61695e-21	2.62301e-20
AAEL000746	22499.8	2.46339	0.258941	9.51332	1.84669e-21	2.99182e-20
AAEL011496	1328.3	1.33061	0.139946	9.50801	1.94351e-21	3.14463e-20
AAEL010831	799.784	1.38088	0.145496	9.49081	2.29245e-21	3.70446e-20
AAEL010032	18635.8	1.50877	0.159024	9.48772	2.36144e-21	3.81105e-20
AAEL000800	11995.4	-2.40054	0.253028	-9.48722	2.37276e-21	3.8244e-20
AAEL005520	3221.45	1.07694	0.113622	9.47827	2.58536e-21	4.16174e-20
AAEL027686	1917.77	-2.61376	0.275994	-9.47034	2.7893e-21	4.48428e-20
AAEL014762	36147.2	2.18025	0.230388	9.46338	2.98159e-21	4.7873e-20
AAEL012841	1657.46	1.01438	0.107195	9.46295	2.99368e-21	4.80058e-20
AAEL025151	6019.34	1.04526	0.110472	9.46177	3.02774e-21	4.84901e-20
AAEL005218	543.117	-1.69072	0.178694	-9.46156	3.03397e-21	4.8528e-20
AAEL012679	533.539	3.41459	0.361131	9.45527	3.2219e-21	5.14686e-20
AAEL006458	4108.79	1.13324	0.119912	9.45058	3.36973e-21	5.37171e-20
AAEL006577	10848.1	1.75287	0.185479	9.45053	3.3712e-21	5.37171e-20
AAEL019990	7595.99	-1.64729	0.174426	-9.44409	3.58517e-21	5.70542e-20
AAEL005939	2115.63	1.87239	0.198305	9.44194	3.65929e-21	5.816e-20
AAEL012658	16764.5	0.944005	0.100102	9.4304	4.08522e-21	6.48477e-20
AAEL015314	8536.11	-0.864648	0.0917778	-9.42111	4.4635e-21	7.07632e-20
AAEL012536	2659.79	-2.39973	0.254782	-9.41874	4.5652e-21	7.21933e-20
AAEL001879	512.948	-1.81914	0.193138	-9.41887	4.5598e-21	7.21933e-20
AAEL025607	3111.34	-1.99585	0.21205	-9.41217	4.8601e-21	7.6664e-20
AAEL014154	1529.35	1.41518	0.150355	9.41225	4.85615e-21	7.6664e-20
AAEL022056	13564.6	1.31168	0.139378	9.41091	4.91873e-21	7.74915e-20
AAEL017543	1127.7	0.992886	0.105579	9.40422	5.24177e-21	8.24775e-20
AAEL011323	5931.63	-1.44074	0.153327	-9.39652	5.63991e-21	8.86311e-20
AAEL026843	26428	-3.76222	0.40053	-9.39311	5.82518e-21	9.14284e-20
AAEL012007	8856.23	-1.4664	0.15612	-9.39273	5.8466e-21	9.16502e-20
AAEL000581	6255.47	-2.2646	0.241669	-9.37066	7.20775e-21	1.12847e-19
AAEL011719	648.872	1.58375	0.169281	9.35579	8.29774e-21	1.2975e-19
AAEL009634	7655.38	1.10265	0.117922	9.35069	8.7081e-21	1.35998e-19
AAEL008742	4484.72	1.65817	0.177396	9.34726	8.99494e-21	1.40303e-19
AAEL006560	2249.5	1.10119	0.117902	9.33992	9.641e-21	1.50194e-19
AAEL012583	2400.19	-1.1378	0.121851	-9.33766	9.84832e-21	1.53234e-19
AAEL006446	1230.11	-3.19315	0.342312	-9.3282	1.07689e-20	1.6735e-19
AAEL007261	924.371	1.09912	0.117902	9.32234	1.13802e-20	1.76632e-19
AAEL002152	1956.73	-1.21845	0.130821	-9.31382	1.23313e-20	1.91157e-19
AAEL001838	1949.96	1.19324	0.128316	9.2992	1.41508e-20	2.19093e-19
AAEL005429	10036.4	2.02751	0.218271	9.28894	1.55833e-20	2.40975e-19
AAEL003646	21887.9	-1.11671	0.12032	-9.28115	1.67665e-20	2.58954e-19
AAEL001540	3242.54	-1.08772	0.11722	-9.27933	1.70553e-20	2.63092e-19
AAEL004933	10652.8	2.3339	0.2516	9.27624	1.75572e-20	2.70501e-19
AAEL004523	32441.2	1.77267	0.19127	9.2679	1.89844e-20	2.92131e-19
AAEL026274	144.343	3.34237	0.360714	9.26598	1.93286e-20	2.97065e-19
AAEL005968	1713.87	1.05064	0.113532	9.25415	2.15952e-20	3.31495e-19
AAEL013243	394.532	1.75115	0.189305	9.25043	2.23582e-20	3.4279e-19
AAEL002555	4740.35	4.22555	0.457038	9.2455	2.34143e-20	3.58543e-19
AAEL001112	3550.27	0.812593	0.0879488	9.23938	2.4792e-20	3.79179e-19
AAEL025868	1928.69	2.29716	0.249013	9.22507	2.83384e-20	4.32892e-19
AAEL020368	128.081	8.06792	0.875313	9.21718	3.05016e-20	4.65372e-19
AAEL019597	14849	1.79582	0.19521	9.19942	3.59894e-20	5.48435e-19
AAEL012743	972.004	-2.1523	0.233989	-9.1983	3.63658e-20	5.535e-19
AAEL012382	33716.1	1.56902	0.170595	9.19735	3.66894e-20	5.57749e-19
AAEL002501	13775.6	0.876144	0.0952798	9.19549	3.73286e-20	5.66098e-19
AAEL003976	5327.22	-0.834009	0.0906971	-9.19554	3.73105e-20	5.66098e-19
AAEL021734	5320.67	2.39763	0.260956	9.1879	4.00592e-20	6.06776e-19
AAEL010565	4288.01	-1.10539	0.120332	-9.18612	4.07257e-20	6.1613e-19
AAEL006617	681.507	3.49593	0.380597	9.18537	4.10098e-20	6.19681e-19
AAEL006823	12546.7	1.79975	0.196081	9.17862	4.3664e-20	6.58997e-19
AAEL023434	116.452	5.79829	0.632307	9.17006	4.7277e-20	7.1267e-19
AAEL005315	6084.13	-1.15458	0.125962	-9.16609	4.90471e-20	7.38467e-19
AAEL020950	172.205	-3.74505	0.408722	-9.16283	5.05524e-20	7.60221e-19
AAEL013276	1185.63	3.31718	0.362232	9.15761	5.30583e-20	7.96953e-19
AAEL009372	2058.68	-1.01137	0.110453	-9.15661	5.35528e-20	8.0342e-19
AAEL008878	6270.86	2.12002	0.231535	9.15638	5.36684e-20	8.04195e-19
AAEL010051	2313.18	0.965632	0.105581	9.1459	5.91364e-20	8.85075e-19
AAEL014379	10499.8	0.948982	0.103793	9.143	6.07457e-20	9.0808e-19
AAEL011025	12405.8	1.10764	0.121167	9.14141	6.16435e-20	9.20406e-19
AAEL003103	18871.5	0.577573	0.0632453	9.13227	6.70785e-20	1.00037e-18
AAEL022427	1538.37	4.46522	0.489455	9.12285	7.31737e-20	1.08998e-18
AAEL002539	43671.5	0.840723	0.0921723	9.12122	7.42862e-20	1.10524e-18
AAEL015393	664.735	1.34041	0.147111	9.11161	8.1172e-20	1.20626e-18
AAEL010731	4873.19	-1.54975	0.170312	-9.09945	9.07888e-20	1.34758e-18
AAEL006676	4710.05	1.67958	0.184678	9.09464	9.49039e-20	1.407e-18
AAEL003125	4535.12	1.15891	0.127533	9.0871	1.01719e-19	1.50626e-18
AAEL007092	10569.9	1.34372	0.14788	9.08659	1.02198e-19	1.51157e-18
AAEL009708	3772.47	0.849335	0.0935114	9.08269	1.0592e-19	1.56478e-18
AAEL014422	1441.38	2.0358	0.224373	9.07326	1.1551e-19	1.70445e-18
AAEL010387	916.393	0.919962	0.101462	9.06704	1.22298e-19	1.80249e-18
AAEL004031	5770.41	-3.18982	0.351971	-9.06273	1.27228e-19	1.87297e-18
AAEL003409	1054.57	1.32144	0.145861	9.05959	1.30947e-19	1.92546e-18
AAEL019754	1602.7	-1.16684	0.12882	-9.05792	1.32965e-19	1.95285e-18
AAEL001850	1101.12	-1.31423	0.145191	-9.05175	1.40699e-19	2.06403e-18
AAEL001151	8112.67	1.72452	0.190596	9.04804	1.45559e-19	2.13284e-18
AAEL018164	8172.93	1.56865	0.173415	9.04566	1.48765e-19	2.17727e-18
AAEL002255	137.166	5.75439	0.636277	9.04386	1.51238e-19	2.21089e-18
AAEL000128	14196	1.34821	0.149082	9.04342	1.51842e-19	2.21714e-18
AAEL026039	225.089	-3.53583	0.391143	-9.03975	1.57029e-19	2.29022e-18
AAEL011012	799.945	-2.04744	0.226648	-9.03359	1.66133e-19	2.42019e-18
AAEL000293	43045.8	1.29556	0.143456	9.03107	1.70009e-19	2.47379e-18
AAEL007555	5446.65	2.04849	0.226838	9.03063	1.70687e-19	2.48078e-18
AAEL011929	8033.54	5.54687	0.61434	9.02899	1.73262e-19	2.51531e-18
AAEL024358	3156.73	1.10445	0.122339	9.02772	1.75278e-19	2.54163e-18
AAEL010679	363.814	2.33732	0.258955	9.02599	1.78079e-19	2.57927e-18
AAEL010939	1935.84	0.667369	0.0739638	9.02292	1.83149e-19	2.64965e-18
AAEL011055	4449.96	-0.914718	0.101379	-9.02273	1.83456e-19	2.65105e-18
AAEL000185	27487.4	0.914777	0.101464	9.01582	1.954e-19	2.8204e-18
AAEL019476	310.484	-2.19589	0.243814	-9.00645	2.12844e-19	3.06867e-18
AAEL018241	23147	-2.80352	0.31145	-9.00149	2.22672e-19	3.20668e-18
AAEL010146	9065.82	1.12406	0.124884	9.00077	2.24132e-19	3.22402e-18
AAEL023148	7066.34	-1.45344	0.16154	-8.99742	2.31085e-19	3.32022e-18
AAEL014649	865.746	1.03361	0.11488	8.99725	2.31437e-19	3.32149e-18
AAEL002089	1181.17	-1.05571	0.117424	-8.99057	2.45952e-19	3.52578e-18
AAEL001159	4940.82	-1.38364	0.153954	-8.98737	2.5322e-19	3.62583e-18
AAEL010684	1703.15	1.52763	0.170005	8.98578	2.56899e-19	3.67433e-18
AAEL005728	5966.73	1.21837	0.13571	8.9777	2.76476e-19	3.94983e-18
AAEL005798	69459.9	1.23904	0.138148	8.96892	2.99423e-19	4.26812e-18
AAEL000984	203.626	-2.32962	0.259744	-8.96892	2.99434e-19	4.26812e-18
AAEL012347	3670.44	-1.52327	0.169962	-8.96237	3.17763e-19	4.52426e-18
AAEL010379	375.098	2.96434	0.33084	8.96005	3.24522e-19	4.61525e-18
AAEL007718	27270.7	0.729161	0.0814336	8.95406	3.42658e-19	4.86768e-18
AAEL012929	1098.44	-1.83753	0.205261	-8.95218	3.48542e-19	4.94567e-18
AAEL023509	1526.92	-1.60132	0.178965	-8.94769	3.6301e-19	5.14517e-18
AAEL019516	2745.67	2.05142	0.229341	8.94483	3.72508e-19	5.27383e-18
AAEL009882	2221.18	1.1285	0.126225	8.94041	3.8772e-19	5.48303e-18
AAEL007767	2185.71	-0.719981	0.0806678	-8.92526	4.44659e-19	6.28118e-18
AAEL003704	1035.64	1.84433	0.206799	8.91849	4.72673e-19	6.66941e-18
AAEL011750	7760.95	0.685734	0.0769375	8.91287	4.97269e-19	7.0086e-18
AAEL000750	1463.29	0.869155	0.0975336	8.91133	5.0422e-19	7.09861e-18
AAEL021846	1600.1	2.43536	0.27335	8.90933	5.13409e-19	7.21989e-18
AAEL006640	827.897	1.28057	0.143768	8.90722	5.2326e-19	7.35019e-18
AAEL002869	1317.48	-0.946564	0.106282	-8.90612	5.28505e-19	7.41559e-18
AAEL010378	5008.57	-0.801484	0.0901111	-8.8944	5.87367e-19	8.23231e-18
AAEL008741	2272.09	0.73847	0.0830692	8.88982	6.12102e-19	8.56943e-18
AAEL006741	15114.4	-0.600753	0.067627	-8.88333	6.48871e-19	9.07408e-18
AAEL026452	958.983	1.26662	0.142611	8.88164	6.58826e-19	9.20307e-18
AAEL027749	1392.96	0.985593	0.110983	8.88057	6.65201e-19	9.2818e-18
AAEL011088	8155.99	1.98314	0.22353	8.87191	7.1902e-19	1.00216e-17
AAEL017368	14063.3	1.08385	0.122302	8.86203	7.85723e-19	1.09392e-17
AAEL007710	1705.88	0.807163	0.0910871	8.86144	7.89869e-19	1.09848e-17
AAEL022505	1204.79	0.952111	0.107455	8.86058	7.96001e-19	1.10578e-17
AAEL013286	1049.83	-1.53781	0.173571	-8.85981	8.01474e-19	1.11216e-17
AAEL013628	49371.5	-1.34492	0.151839	-8.85757	8.17752e-19	1.13349e-17
AAEL008154	12984.6	-0.700213	0.0791208	-8.84992	8.75785e-19	1.2126e-17
AAEL005038	6469.66	-0.711589	0.0804569	-8.84435	9.20598e-19	1.27324e-17
AAEL022401	341.406	2.72142	0.307743	8.84316	9.30511e-19	1.28554e-17
AAEL003791	1325.15	1.39691	0.157981	8.84223	9.38284e-19	1.29485e-17
AAEL008938	1909.09	0.760642	0.0860396	8.8406	9.521e-19	1.31248e-17
AAEL012394	10239.3	0.929621	0.105163	8.83981	9.58785e-19	1.32025e-17
AAEL001541	1551.25	0.791354	0.0895545	8.83657	9.87011e-19	1.35763e-17
AAEL019862	5708.89	3.29121	0.372501	8.83545	9.96969e-19	1.36982e-17
AAEL012250	2364.58	0.806805	0.0913586	8.83118	1.03573e-18	1.42152e-17
AAEL001807	2822.53	2.2246	0.251977	8.82858	1.06013e-18	1.45342e-17
AAEL002235	2842.13	1.47192	0.166753	8.82698	1.0754e-18	1.47276e-17
AAEL013353	31345	0.956403	0.108369	8.82539	1.09077e-18	1.49218e-17
AAEL012310	11679.1	0.691029	0.0783235	8.82276	1.11675e-18	1.52606e-17
AAEL019748	10731.9	0.80469	0.0912332	8.82015	1.14307e-18	1.56034e-17
AAEL011891	643.842	8.07848	0.916141	8.81794	1.16583e-18	1.58968e-17
AAEL009526	5709.52	1.13436	0.128763	8.80965	1.25537e-18	1.70991e-17
AAEL013114	1306.7	1.64597	0.186878	8.80773	1.27703e-18	1.73754e-17
AAEL018237	4465.7	0.714774	0.0811557	8.80744	1.28031e-18	1.74011e-17
AAEL003034	701.745	1.0365	0.11774	8.80327	1.32888e-18	1.80418e-17
AAEL011340	3931.44	0.856446	0.0973493	8.79767	1.39689e-18	1.89447e-17
AAEL006659	3289.68	0.72242	0.0821904	8.7896	1.50097e-18	2.03343e-17
AAEL007892	12261.5	2.32518	0.26462	8.78687	1.53785e-18	2.08115e-17
AAEL019845	18400.1	1.34993	0.153889	8.77207	1.7541e-18	2.37124e-17
AAEL001810	2923.88	-0.783545	0.0893367	-8.7707	1.77561e-18	2.39774e-17
AAEL013533	39863.4	-0.966369	0.110192	-8.76985	1.78908e-18	2.41334e-17
AAEL000701	1363.41	1.26214	0.143972	8.76656	1.84212e-18	2.48222e-17
AAEL014335	3624.32	-1.32295	0.150915	-8.7662	1.848e-18	2.48748e-17
AAEL013495	1053.61	1.63486	0.187174	8.73445	2.44834e-18	3.29204e-17
AAEL009150	21757	1.80477	0.206639	8.73393	2.4597e-18	3.30378e-17
AAEL004567	7900.66	-0.869577	0.0996041	-8.73033	2.53923e-18	3.40696e-17
AAEL019624	1537.85	-1.6847	0.193028	-8.72777	2.59747e-18	3.47768e-17
AAEL001102	4660.63	0.904483	0.103633	8.72778	2.59727e-18	3.47768e-17
AAEL012931	713.954	-1.53115	0.175636	-8.71777	2.83723e-18	3.79465e-17
AAEL014216	168.344	-3.6741	0.421712	-8.71235	2.97633e-18	3.97645e-17
AAEL010018	11404.4	-1.3466	0.154591	-8.71074	3.01888e-18	4.02902e-17
AAEL009762	3301.91	6.38455	0.73298	8.71041	3.02789e-18	4.03675e-17
AAEL011050	1628.48	-0.929127	0.1068	-8.69972	3.32691e-18	4.43072e-17
AAEL009772	3916.06	0.77111	0.0886469	8.69867	3.35791e-18	4.46726e-17
AAEL003008	410.932	-1.6555	0.19047	-8.69169	3.57086e-18	4.74555e-17
AAEL003075	1191.45	-1.252	0.144128	-8.68671	3.73076e-18	4.95282e-17
AAEL010389	2406.87	2.10689	0.242731	8.67995	3.95933e-18	5.2507e-17
AAEL005313	611.671	1.12397	0.129582	8.67376	4.18075e-18	5.53851e-17
AAEL014555	1834.02	1.7259	0.198992	8.67317	4.2025e-18	5.56145e-17
AAEL026160	573.089	-1.61952	0.18703	-8.65911	4.75464e-18	6.28553e-17
AAEL024235	16680.3	-1.12549	0.130117	-8.64988	5.15533e-18	6.80807e-17
AAEL012326	66856.6	1.1882	0.137404	8.64745	5.26643e-18	6.94749e-17
AAEL008924	5573.63	-1.17405	0.13582	-8.64413	5.42165e-18	7.14475e-17
AAEL022931	13927	0.701455	0.0811723	8.64156	5.54516e-18	7.29988e-17
AAEL001243	1174.43	-1.23677	0.143262	-8.63294	5.97939e-18	7.86328e-17
AAEL006654	556.702	1.4089	0.163209	8.63252	6.00158e-18	7.88421e-17
AAEL028239	3684.67	1.47453	0.170873	8.62941	6.16674e-18	8.09272e-17
AAEL022092	767.841	1.47375	0.170935	8.62168	6.59796e-18	8.64958e-17
AAEL010778	7724.97	-1.35542	0.157256	-8.61919	6.74267e-18	8.83008e-17
AAEL013965	409.087	1.60612	0.186446	8.61439	7.03121e-18	9.19837e-17
AAEL012656	568.072	1.48187	0.172044	8.61334	7.09596e-18	9.27344e-17
AAEL013400	1101.39	1.52823	0.177441	8.61259	7.14265e-18	9.32476e-17
AAEL003363	779.834	1.76911	0.205464	8.61032	7.28561e-18	9.50153e-17
AAEL019829	354.207	4.98799	0.580203	8.59698	8.1841e-18	1.06622e-16
AAEL025017	1041.03	-0.826549	0.0961632	-8.59528	8.30642e-18	1.08104e-16
AAEL023561	283.878	-2.37537	0.276824	-8.58079	9.42205e-18	1.22496e-16
AAEL000412	1971.42	2.00784	0.234077	8.57769	9.68006e-18	1.25721e-16
AAEL005719	1286.65	1.54163	0.180282	8.55123	1.21781e-17	1.58001e-16
AAEL019824	3192.93	0.919498	0.107554	8.5492	1.23941e-17	1.60638e-16
AAEL026240	3944.88	1.59281	0.186334	8.54811	1.25123e-17	1.62003e-16
AAEL008769	277699	4.12294	0.482362	8.54739	1.25901e-17	1.62843e-16
AAEL017356	1432.76	3.2313	0.378432	8.53866	1.35792e-17	1.75454e-16
AAEL018226	985.76	-1.00005	0.117206	-8.53245	1.43277e-17	1.84936e-16
AAEL002353	1491.66	-1.93156	0.226383	-8.53225	1.43532e-17	1.85075e-16
AAEL008393	2652.12	1.96051	0.229848	8.52961	1.46838e-17	1.89144e-16
AAEL022497	28148.4	1.18651	0.139236	8.52159	1.57374e-17	2.02508e-16
AAEL007760	1415.41	1.1159	0.130979	8.51971	1.59956e-17	2.0562e-16
AAEL017435	1311.17	-1.05413	0.123739	-8.51892	1.61043e-17	2.06806e-16
AAEL011912	2446.81	0.988516	0.116052	8.5179	1.62471e-17	2.08427e-16
AAEL008921	10935.1	0.907926	0.106669	8.51163	1.71504e-17	2.1979e-16
AAEL004212	2490.59	-2.2942	0.269573	-8.51051	1.73172e-17	2.21702e-16
AAEL018320	1780.1	-1.70323	0.200147	-8.50991	1.7407e-17	2.22626e-16
AAEL013989	13669	1.30243	0.153066	8.50895	1.75519e-17	2.24251e-16
AAEL002102	4754.45	1.54679	0.181858	8.50545	1.80896e-17	2.30886e-16
AAEL009951	2154.66	-2.01646	0.237262	-8.49891	1.91378e-17	2.44016e-16
AAEL022327	263.908	-2.68594	0.316159	-8.49552	1.97049e-17	2.50928e-16
AAEL017030	15415.7	-0.79845	0.0939858	-8.49543	1.97198e-17	2.50928e-16
AAEL013997	3751.29	-0.766798	0.0902743	-8.49409	1.99498e-17	2.53598e-16
AAEL028635	12466.3	1.61572	0.190295	8.49063	2.0552e-17	2.6099e-16
AAEL006699	8699.56	-1.2439	0.146574	-8.48645	2.13037e-17	2.70263e-16
AAEL015077	3030.14	-1.2227	0.144092	-8.48554	2.14728e-17	2.72133e-16
AAEL011059	1351.22	0.992183	0.11695	8.48381	2.17941e-17	2.75927e-16
AAEL012312	15956.7	1.17113	0.138053	8.4832	2.19082e-17	2.77093e-16
AAEL002486	775.322	1.321	0.155726	8.48289	2.19673e-17	2.7756e-16
AAEL003203	99310.2	1.59519	0.188149	8.47834	2.28425e-17	2.88329e-16
AAEL006820	13738.5	1.2026	0.141883	8.47601	2.33042e-17	2.93862e-16
AAEL000572	1174.57	2.76744	0.32661	8.47325	2.38647e-17	3.00628e-16
AAEL013987	15086.3	1.69675	0.200459	8.46435	2.57592e-17	3.24168e-16
AAEL004356	1136.48	-1.40388	0.165872	-8.46364	2.59151e-17	3.25804e-16
AAEL026227	2893.01	-1.41838	0.167633	-8.46126	2.64508e-17	3.32208e-16
AAEL011306	1279.01	-0.981555	0.116016	-8.46053	2.66155e-17	3.3361e-16
AAEL009706	13590.1	-1.19837	0.141642	-8.46054	2.66132e-17	3.3361e-16
AAEL000223	30928.3	2.06153	0.243816	8.45526	2.78468e-17	3.48695e-16
AAEL009808	17842.8	1.10052	0.130161	8.45505	2.78969e-17	3.48975e-16
AAEL020234	604.528	-1.35612	0.160479	-8.45043	2.90237e-17	3.6271e-16
AAEL007682	4613.46	-1.54987	0.183474	-8.44739	2.97899e-17	3.71915e-16
AAEL024838	2872.64	-1.69082	0.200268	-8.4428	3.09832e-17	3.86429e-16
AAEL003951	1962.97	-2.15462	0.255321	-8.43887	3.20427e-17	3.99247e-16
AAEL005552	2295.77	1.00025	0.118584	8.43493	3.31407e-17	4.12519e-16
AAEL010819	16213.6	0.832171	0.0987365	8.4282	3.51016e-17	4.36496e-16
AAEL017244	7535.27	-1.48119	0.175869	-8.4221	3.69801e-17	4.59401e-16
AAEL007680	176.294	-2.88044	0.342029	-8.42163	3.71274e-17	4.60776e-16
AAEL021837	386.506	1.39134	0.165261	8.41904	3.79568e-17	4.70251e-16
AAEL023194	211.139	-3.05413	0.362766	-8.41902	3.79657e-17	4.70251e-16
AAEL005796	1754.18	1.1273	0.134013	8.41192	4.03361e-17	4.99119e-16
AAEL019426	3507.03	-1.36819	0.162687	-8.40996	4.1014e-17	5.07009e-16
AAEL004441	2087.88	0.913522	0.108632	8.4093	4.12477e-17	5.09397e-16
AAEL003130	7144.18	0.586744	0.0698187	8.40382	4.32189e-17	5.33216e-16
AAEL002683	13738.2	1.44232	0.171644	8.40301	4.35192e-17	5.36396e-16
AAEL013723	2008.36	-1.21743	0.144884	-8.40283	4.3586e-17	5.36693e-16
AAEL014507	2293.66	0.961996	0.114586	8.39543	4.64207e-17	5.71039e-16
AAEL007773	1311.11	-0.943077	0.112356	-8.39364	4.71325e-17	5.79227e-16
AAEL011567	4312.96	0.799958	0.0953173	8.39259	4.75565e-17	5.83868e-16
AAEL025271	638.264	-1.1316	0.134854	-8.39129	4.80834e-17	5.89761e-16
AAEL011462	621.225	0.964258	0.114948	8.38865	4.91747e-17	6.02557e-16
AAEL025053	372.253	3.29159	0.392853	8.3787	5.35152e-17	6.54469e-16
AAEL008674	6131.92	0.836354	0.0998185	8.37875	5.34933e-17	6.54469e-16
AAEL020535	1132.65	-0.971864	0.116047	-8.37478	5.53275e-17	6.75974e-16
AAEL010777	16065	1.3627	0.162815	8.36964	5.77944e-17	7.05428e-16
AAEL018293	1841.15	-0.754631	0.0901656	-8.36939	5.79189e-17	7.06262e-16
AAEL010946	800.177	-1.69158	0.202181	-8.36665	5.92795e-17	7.22153e-16
AAEL002861	7893.07	2.87366	0.343615	8.36303	6.11294e-17	7.43968e-16
AAEL002412	2737.24	1.89684	0.227314	8.34456	7.14815e-17	8.69116e-16
AAEL019444	1124.78	-2.57072	0.308449	-8.33436	7.79183e-17	9.46462e-16
AAEL014257	317.843	-1.52569	0.183082	-8.33337	7.85712e-17	9.53473e-16
AAEL003170	622.89	1.27906	0.153501	8.33258	7.91017e-17	9.58984e-16
AAEL007080	4928.37	2.19903	0.263938	8.33163	7.97356e-17	9.65737e-16
AAEL012318	91.8056	5.24717	0.630816	8.31807	8.94056e-17	1.08182e-15
AAEL014890	1296.25	4.601	0.553339	8.31499	9.1763e-17	1.10927e-15
AAEL025250	1398.7	1.64351	0.197737	8.31159	9.44295e-17	1.14041e-15
AAEL003874	608.154	1.24693	0.150039	8.3107	9.51378e-17	1.14786e-15
AAEL007390	4022.92	0.893036	0.107474	8.3093	9.62675e-17	1.16038e-15
AAEL009891	2468.45	-0.737717	0.0887873	-8.30881	9.66675e-17	1.16408e-15
AAEL002870	13280.9	1.11523	0.134231	8.3083	9.70867e-17	1.16801e-15
AAEL023159	2261.45	1.96231	0.236208	8.30757	9.76843e-17	1.17408e-15
AAEL003923	5026.74	1.02382	0.123271	8.30545	9.94389e-17	1.19403e-15
AAEL015298	4989.56	1.37078	0.165237	8.29581	1.0785e-16	1.29379e-15
AAEL000257	683.167	1.02827	0.123973	8.29434	1.09191e-16	1.30863e-15
AAEL000947	6440.45	1.45547	0.175489	8.29381	1.09678e-16	1.31321e-15
AAEL023679	1191.12	-1.51819	0.183159	-8.28895	1.14256e-16	1.36673e-15
AAEL023242	3115.4	0.761125	0.0918638	8.28537	1.17746e-16	1.40713e-15
AAEL006186	7999.93	-0.585772	0.0707361	-8.28109	1.22049e-16	1.45717e-15
AAEL011575	2692.86	-1.9913	0.240532	-8.27873	1.24497e-16	1.48499e-15
AAEL003552	1254.84	1.10013	0.133118	8.26428	1.40539e-16	1.67475e-15
AAEL000804	602.122	1.60954	0.194786	8.26312	1.41916e-16	1.68955e-15
AAEL013494	1179.81	1.12805	0.136551	8.26104	1.44407e-16	1.71758e-15
AAEL008893	8090.46	1.16581	0.141181	8.25758	1.48653e-16	1.76642e-15
AAEL022966	56.9358	-3.4813	0.421702	-8.25535	1.51456e-16	1.79802e-15
AAEL010135	1097.37	0.839112	0.101646	8.25522	1.51624e-16	1.79832e-15
AAEL021307	7247.58	0.700444	0.0848659	8.25354	1.53773e-16	1.82208e-15
AAEL002493	676.054	1.61459	0.195674	8.25143	1.56511e-16	1.85278e-15
AAEL013847	426.566	-2.22166	0.269439	-8.24551	1.64458e-16	1.9432e-15
AAEL019883	12910	-1.18652	0.143898	-8.24561	1.64319e-16	1.9432e-15
AAEL001293	5795.04	1.90632	0.23145	8.23641	1.77448e-16	2.09472e-15
AAEL011650	6616.72	0.931252	0.113116	8.2327	1.83036e-16	2.15866e-15
AAEL021382	1520.86	2.25027	0.273432	8.22972	1.87648e-16	2.21097e-15
AAEL001216	12002.4	0.944067	0.114743	8.22768	1.90867e-16	2.2468e-15
AAEL004951	380.85	-2.11963	0.257752	-8.22354	1.97583e-16	2.32368e-15
AAEL004379	1406.9	-0.974594	0.118541	-8.22159	2.00815e-16	2.35948e-15
AAEL012507	2842.4	0.817645	0.0994648	8.22044	2.02751e-16	2.38e-15
AAEL005580	1506.86	-0.965705	0.117512	-8.21795	2.07015e-16	2.4278e-15
AAEL012698	3642.24	-2.11218	0.257044	-8.21719	2.08331e-16	2.44095e-15
AAEL008718	1145.77	0.780805	0.0950861	8.21156	2.18327e-16	2.55569e-15
AAEL004603	1063.12	1.54212	0.18798	8.20366	2.33183e-16	2.72704e-15
AAEL001646	2109.08	-2.04012	0.248725	-8.2023	2.35833e-16	2.75548e-15
AAEL011781	1819.43	0.74346	0.0906497	8.20147	2.37474e-16	2.77207e-15
AAEL007332	1776.58	0.823198	0.100375	8.20125	2.37909e-16	2.77457e-15
AAEL013384	745.992	-1.83054	0.223219	-8.20063	2.39123e-16	2.78615e-15
AAEL006982	1192.67	-1.91989	0.23417	-8.19868	2.43036e-16	2.82389e-15
AAEL000832	1523.88	0.78704	0.0959952	8.19875	2.42908e-16	2.82389e-15
AAEL004914	2005.41	0.997691	0.121688	8.19877	2.42854e-16	2.82389e-15
AAEL027384	1666.5	-1.21965	0.148808	-8.19618	2.48143e-16	2.88056e-15
AAEL000983	1916.04	0.816075	0.0995932	8.19409	2.52504e-16	2.92848e-15
AAEL000486	14498.2	0.776547	0.0948199	8.18971	2.61865e-16	3.03425e-15
AAEL009935	677.778	3.41968	0.417647	8.18797	2.65671e-16	3.07269e-15
AAEL019611	784.413	-1.61106	0.196758	-8.18803	2.65538e-16	3.07269e-15
AAEL006886	1587.03	-2.47691	0.302876	-8.17796	2.88699e-16	3.33595e-15
AAEL012083	2529.64	-1.14245	0.139724	-8.17643	2.92375e-16	3.37463e-15
AAEL006181	8012.1	2.58815	0.316541	8.17635	2.92582e-16	3.37463e-15
AAEL000500	219419	3.05532	0.374038	8.16846	3.1234e-16	3.59921e-15
AAEL008676	1175.79	1.36837	0.167626	8.1632	3.2626e-16	3.75617e-15
AAEL002337	829.37	1.39081	0.170432	8.16051	3.33614e-16	3.83732e-15
AAEL013900	589.11	-2.06129	0.252705	-8.15693	3.43659e-16	3.94564e-15
AAEL009767	848.15	0.981756	0.120358	8.15695	3.43593e-16	3.94564e-15
AAEL027231	302.749	-1.36168	0.166953	-8.15608	3.46078e-16	3.9698e-15
AAEL027973	911.522	1.05071	0.128835	8.15548	3.47797e-16	3.98588e-15
AAEL007026	1602.35	0.729848	0.089546	8.15053	3.62319e-16	4.14851e-15
AAEL006196	17402.3	1.24918	0.153391	8.14377	3.83157e-16	4.38312e-15
AAEL010704	5362.7	0.550476	0.0676248	8.14016	3.94757e-16	4.51171e-15
AAEL010716	13458.8	1.38447	0.170129	8.13775	4.02677e-16	4.59805e-15
AAEL003873	5551.69	-2.80901	0.345196	-8.13744	4.03733e-16	4.60592e-15
AAEL027111	1260.98	-0.92872	0.114168	-8.13469	4.1298e-16	4.70715e-15
AAEL010782	317256	2.12645	0.261557	8.12997	4.29395e-16	4.88982e-15
AAEL025569	2048.23	-1.5428	0.189816	-8.12785	4.36964e-16	4.9715e-15
AAEL025982	72.1221	-2.3432	0.288646	-8.11789	4.74347e-16	5.3916e-15
AAEL009288	901.446	1.2972	0.159798	8.11779	4.74745e-16	5.3916e-15
AAEL000383	646.209	1.10806	0.136503	8.1175	4.75896e-16	5.39979e-15
AAEL008787	89037.1	1.13825	0.140269	8.11476	4.8675e-16	5.51796e-15
AAEL007738	1114.67	0.970855	0.11965	8.11414	4.89243e-16	5.54123e-15
AAEL004436	2651.24	0.820146	0.101086	8.11339	4.92266e-16	5.57045e-15
AAEL009399	253.005	1.72225	0.212336	8.11097	5.0217e-16	5.67741e-15
AAEL008144	1290.71	-1.95008	0.240507	-8.10821	5.1372e-16	5.80145e-15
AAEL005190	1514.05	1.76789	0.218039	8.10813	5.14064e-16	5.80145e-15
AAEL004183	2119.11	0.995482	0.122904	8.09968	5.51029e-16	6.21303e-15
AAEL019762	1751.81	-1.06778	0.131915	-8.09447	5.75122e-16	6.47888e-15
AAEL006048	1833.07	1.26487	0.156367	8.08914	6.00899e-16	6.7632e-15
AAEL025929	1953.57	-1.36462	0.168707	-8.08865	6.03274e-16	6.78387e-15
AAEL024438	638.315	2.70042	0.334067	8.08348	6.29452e-16	7.07191e-15
AAEL004865	68482.5	-0.964387	0.11938	-8.07832	6.56664e-16	7.37105e-15
AAEL003384	301.601	1.55702	0.19278	8.07668	6.65513e-16	7.46372e-15
AAEL006436	3176.01	-0.780281	0.0966409	-8.07402	6.80224e-16	7.62191e-15
AAEL001940	917.565	-1.97697	0.245017	-8.06871	7.10423e-16	7.9532e-15
AAEL003160	25429.4	-1.426	0.176735	-8.06859	7.11134e-16	7.95407e-15
AAEL024520	1572.37	-7.57187	0.939192	-8.06211	7.49867e-16	8.37984e-15
AAEL011584	15670.3	2.48721	0.308669	8.05786	7.76437e-16	8.66907e-15
AAEL002912	2120.54	0.932969	0.115832	8.05454	7.97808e-16	8.89977e-15
AAEL014064	11303.5	1.19152	0.147956	8.05321	8.0648e-16	8.98853e-15
AAEL012702	96994.8	1.38039	0.171432	8.05212	8.13754e-16	9.06157e-15
AAEL019672	2838.31	-1.39595	0.173372	-8.05181	8.15784e-16	9.07614e-15
AAEL005084	1901.81	1.32637	0.164772	8.04973	8.2977e-16	9.22358e-15
AAEL007469	772.471	1.17142	0.145534	8.04915	8.33741e-16	9.25953e-15
AAEL009857	5591.14	-1.12091	0.139287	-8.04745	8.45335e-16	9.38001e-15
AAEL003143	3161.87	-0.510715	0.06349	-8.04403	8.69327e-16	9.63772e-15
AAEL001915	782.494	-2.06353	0.256608	-8.04156	8.87032e-16	9.82535e-15
AAEL002752	245.642	1.34247	0.167102	8.03386	9.44496e-16	1.04526e-14
AAEL011711	20731.1	0.949035	0.11814	8.03311	9.50361e-16	1.05083e-14
AAEL006836	707.91	1.10961	0.138208	8.02856	9.86242e-16	1.08955e-14
AAEL022803	2211.2	0.491281	0.0612246	8.02425	1.02149e-15	1.1275e-14
AAEL005492	4147.89	-1.16449	0.145144	-8.02301	1.03188e-15	1.13797e-14
AAEL000994	8052.08	-1.08308	0.135054	-8.01957	1.06114e-15	1.1692e-14
AAEL021176	2341.98	-0.898468	0.112089	-8.01564	1.09562e-15	1.20614e-14
AAEL024841	11129.5	0.698397	0.0871533	8.01342	1.11558e-15	1.22704e-14
AAEL007729	1424.38	-1.40901	0.17589	-8.01071	1.14045e-15	1.2533e-14
AAEL005191	736.714	1.45943	0.182322	8.00467	1.19789e-15	1.31527e-14
AAEL009043	5187.53	-1.07858	0.134768	-8.00319	1.21239e-15	1.33003e-14
AAEL007586	6719.13	-1.10655	0.138326	-7.99957	1.2485e-15	1.36846e-14
AAEL006791	176.28	-2.18493	0.273136	-7.99942	1.25009e-15	1.369e-14
AAEL000301	3728.76	1.38942	0.173722	7.99795	1.26505e-15	1.38297e-14
AAEL001626	7382.13	1.54542	0.193226	7.99799	1.26467e-15	1.38297e-14
AAEL025856	49681.3	-0.718455	0.0898917	-7.99245	1.32287e-15	1.44493e-14
AAEL003899	34840	-1.56598	0.196065	-7.98706	1.382e-15	1.5082e-14
AAEL021190	1197.3	1.43721	0.180014	7.98389	1.41793e-15	1.54607e-14
AAEL002771	1266.29	-0.794784	0.0995652	-7.98254	1.4335e-15	1.56169e-14
AAEL019848	49.7257	4.69268	0.588152	7.97868	1.47903e-15	1.6099e-14
AAEL004913	5317.47	0.664306	0.0833806	7.96715	1.62374e-15	1.76589e-14
AAEL022757	14690.8	0.922196	0.115772	7.96561	1.64414e-15	1.78498e-14
AAEL024950	3200.08	-0.812932	0.102054	-7.96569	1.64308e-15	1.78498e-14
AAEL011317	1552.04	1.11657	0.140222	7.96288	1.68081e-15	1.82322e-14
AAEL011748	784.465	1.6275	0.204427	7.96127	1.70288e-15	1.84557e-14
AAEL004287	3232.01	0.75858	0.0953197	7.95827	1.74462e-15	1.88917e-14
AAEL010905	4847.85	1.14042	0.143314	7.95749	1.75567e-15	1.89858e-14
AAEL024934	71260.9	4.14263	0.520599	7.95744	1.75632e-15	1.89858e-14
AAEL008468	1304.85	1.98997	0.250106	7.95648	1.77006e-15	1.91178e-14
AAEL008687	4044.39	1.06925	0.134431	7.95388	1.80764e-15	1.9507e-14
AAEL019580	2209.05	-1.45181	0.182542	-7.95328	1.81638e-15	1.95845e-14
AAEL013132	2957.27	1.08402	0.136317	7.95216	1.83293e-15	1.9746e-14
AAEL012819	21211.4	1.40491	0.176723	7.94978	1.86849e-15	2.01119e-14
AAEL002983	3003.39	-0.601547	0.0756742	-7.94917	1.87768e-15	2.01935e-14
AAEL005358	1642.08	1.0688	0.134466	7.94846	1.88842e-15	2.02916e-14
AAEL005903	1789.84	3.85754	0.485406	7.94704	1.91026e-15	2.05088e-14
AAEL004582	12610.7	2.75896	0.347685	7.93523	2.10106e-15	2.2538e-14
AAEL009323	6153.15	-2.17121	0.273858	-7.92823	2.22289e-15	2.38246e-14
AAEL013872	3842.33	-0.838069	0.105733	-7.92624	2.25887e-15	2.41895e-14
AAEL002049	4073.47	-1.73972	0.219535	-7.92458	2.28928e-15	2.44943e-14
AAEL004113	519.788	1.03912	0.131184	7.92108	2.35453e-15	2.5171e-14
AAEL010891	209.398	-1.48287	0.18721	-7.92092	2.35753e-15	2.51817e-14
AAEL020609	14188.7	-1.46418	0.184906	-7.91851	2.40375e-15	2.56536e-14
AAEL020929	326.072	1.45594	0.184006	7.91244	2.52385e-15	2.69125e-14
AAEL000559	1754.79	0.852489	0.107743	7.91223	2.52811e-15	2.69351e-14
AAEL012093	8323.22	-0.748079	0.0945726	-7.9101	2.57178e-15	2.73771e-14
AAEL009872	22068.8	1.17963	0.149159	7.90849	2.60521e-15	2.77096e-14
AAEL014863	1444.45	-1.38788	0.175664	-7.90075	2.77232e-15	2.94613e-14
AAEL022372	217.246	1.65788	0.209841	7.90065	2.77459e-15	2.94613e-14
AAEL001215	5118.77	-1.21866	0.154284	-7.89883	2.81528e-15	2.98681e-14
AAEL025656	1633.19	1.46499	0.18548	7.89837	2.82578e-15	2.99542e-14
AAEL004546	13786.9	0.654486	0.0828903	7.8958	2.88454e-15	3.05514e-14
AAEL021760	2397	0.816388	0.103413	7.89448	2.91536e-15	3.08518e-14
AAEL006510	3568.44	-0.952651	0.120703	-7.89251	2.96172e-15	3.1316e-14
AAEL001166	1117.82	1.22937	0.155814	7.89002	3.02139e-15	3.19201e-14
AAEL005415	1680.24	0.81636	0.103472	7.88968	3.02958e-15	3.19797e-14
AAEL015202	2412.45	1.00283	0.127236	7.88166	3.23072e-15	3.40743e-14
AAEL013675	12782.2	0.873093	0.110781	7.88122	3.24191e-15	3.41637e-14
AAEL002271	2099.09	0.629567	0.0799021	7.87922	3.2942e-15	3.46857e-14
AAEL024820	55.1067	-4.86734	0.617897	-7.87728	3.34594e-15	3.52009e-14
AAEL009169	14520.7	-1.28659	0.163444	-7.87178	3.49634e-15	3.67525e-14
AAEL014972	594.369	-2.96735	0.377046	-7.87	3.54652e-15	3.72488e-14
AAEL002980	501.273	1.3289	0.16906	7.86054	3.82484e-15	4.01385e-14
AAEL004444	1184.66	-1.08545	0.138094	-7.86022	3.8345e-15	4.02063e-14
AAEL011180	83909.6	1.01717	0.129503	7.85439	4.0173e-15	4.20879e-14
AAEL023604	526.442	-1.40909	0.17956	-7.8475	4.24417e-15	4.44277e-14
AAEL000240	1545.92	0.740642	0.0943817	7.84731	4.25053e-15	4.44573e-14
AAEL008164	2406.6	-1.22865	0.156605	-7.84554	4.3111e-15	4.50534e-14
AAEL013828	1546.2	0.844227	0.107695	7.83906	4.53931e-15	4.73988e-14
AAEL012914	3471.34	0.939249	0.119926	7.83189	4.80606e-15	5.01426e-14
AAEL021450	12124.6	-0.888082	0.113411	-7.83064	4.85391e-15	5.05578e-14
AAEL004165	260.944	-2.86764	0.366204	-7.83071	4.85108e-15	5.05578e-14
AAEL013613	5017.74	-0.90945	0.116198	-7.82675	5.00647e-15	5.21038e-14
AAEL009703	752.647	0.929752	0.11885	7.82292	5.16123e-15	5.367e-14
AAEL004682	4954.59	1.04646	0.133771	7.82279	5.16643e-15	5.36796e-14
AAEL006346	2367.52	-1.12153	0.143418	-7.82002	5.2813e-15	5.48279e-14
AAEL001187	1718.02	0.733143	0.0937676	7.81872	5.33619e-15	5.5352e-14
AAEL001389	5335.44	-0.777047	0.0994283	-7.81515	5.48985e-15	5.68989e-14
AAEL003326	5646.24	-0.974856	0.124743	-7.8149	5.50046e-15	5.69619e-14
AAEL024696	862.944	-2.18976	0.280366	-7.81035	5.703e-15	5.90108e-14
AAEL025877	1102.32	1.37678	0.176288	7.80985	5.72573e-15	5.91973e-14
AAEL005259	1879.53	-1.04996	0.13445	-7.80929	5.75088e-15	5.94085e-14
AAEL001605	5343.45	-0.589977	0.075577	-7.8063	5.88927e-15	6.07881e-14
AAEL000673	1424.23	0.974659	0.124903	7.80335	6.02828e-15	6.21719e-14
AAEL004507	1794.15	1.31462	0.168477	7.80295	6.04746e-15	6.23185e-14
AAEL007017	1283.02	0.772708	0.0990988	7.79736	6.32178e-15	6.50921e-14
AAEL005536	78568	-0.577455	0.0740623	-7.79687	6.34595e-15	6.52874e-14
AAEL008635	7272.4	2.47832	0.317927	7.79522	6.42951e-15	6.6093e-14
AAEL012113	26401.7	0.897208	0.11519	7.78892	6.7583e-15	6.94161e-14
AAEL002668	1133.2	1.63455	0.209992	7.78384	7.03566e-15	7.22059e-14
AAEL025600	738.393	0.918528	0.118013	7.78327	7.06751e-15	7.24737e-14
AAEL007816	19881.3	1.10552	0.142066	7.78176	7.152e-15	7.32803e-14
AAEL010434	6202.85	8.76234	1.12608	7.78128	7.17938e-15	7.3501e-14
AAEL003730	711.003	1.30358	0.167555	7.78005	7.24985e-15	7.4162e-14
AAEL007777	33103.5	1.13489	0.145998	7.77333	7.64465e-15	7.8137e-14
AAEL019422	1676.72	-1.84091	0.23684	-7.77279	7.67737e-15	7.84077e-14
AAEL020524	177.826	-2.72997	0.351342	-7.77012	7.84102e-15	7.99644e-14
AAEL022948	1504.05	1.45253	0.186939	7.7701	7.84251e-15	7.99644e-14
AAEL012661	13963	0.525789	0.067676	7.7692	7.89819e-15	8.04669e-14
AAEL005739	11710.2	-1.15808	0.149119	-7.76616	8.0901e-15	8.23552e-14
AAEL000084	5360.9	0.735041	0.0946836	7.76313	8.2858e-15	8.42792e-14
AAEL008208	821.932	11.5465	1.48847	7.75727	8.67746e-15	8.81916e-14
AAEL008823	617.169	-2.28175	0.294155	-7.75698	8.69775e-15	8.83265e-14
AAEL019406	3444.17	-1.15673	0.149373	-7.74389	9.64223e-15	9.78387e-14
AAEL021196	237.576	-2.9125	0.376277	-7.74031	9.91731e-15	1.00549e-13
AAEL025578	4810.3	0.716282	0.0925927	7.73584	1.02722e-14	1.04063e-13
AAEL019921	978.37	-0.978159	0.126467	-7.73449	1.03818e-14	1.05018e-13
AAEL010480	1387.33	1.71067	0.221175	7.73447	1.03832e-14	1.05018e-13
AAEL000452	1299.8	-0.783059	0.101254	-7.7336	1.04544e-14	1.05653e-13
AAEL010145	70169.7	-1.85264	0.239574	-7.73309	1.04966e-14	1.05995e-13
AAEL004490	2184.4	1.38497	0.17915	7.73079	1.06879e-14	1.07839e-13
AAEL003273	611.829	1.46952	0.19022	7.72537	1.1153e-14	1.12443e-13
AAEL011264	19997.8	1.34586	0.174231	7.72459	1.12214e-14	1.13041e-13
AAEL017512	18229.6	-0.915836	0.118598	-7.72217	1.14365e-14	1.15115e-13
AAEL024527	234.154	-1.57643	0.204171	-7.72112	1.15309e-14	1.15881e-13
AAEL004699	51062.9	-0.729353	0.094461	-7.72121	1.15235e-14	1.15881e-13
AAEL003066	264024	1.73138	0.224256	7.72055	1.1583e-14	1.16311e-13
AAEL004497	3056.96	0.646045	0.0836887	7.71962	1.16681e-14	1.17072e-13
AAEL005868	16813.6	-0.594299	0.0770349	-7.71467	1.21293e-14	1.21603e-13
AAEL027289	635.302	1.22041	0.158217	7.71351	1.22399e-14	1.22614e-13
AAEL013877	9438.68	1.81636	0.235514	7.7123	1.23568e-14	1.23687e-13
AAEL005290	2298.43	-1.10111	0.142874	-7.70682	1.28988e-14	1.28962e-13
AAEL011832	2235.21	1.04113	0.135093	7.70677	1.29044e-14	1.28962e-13
AAEL003145	609.97	-2.1625	0.280673	-7.70468	1.3117e-14	1.3097e-13
AAEL003505	11909.1	-1.0289	0.133544	-7.70459	1.31262e-14	1.3097e-13
AAEL005900	3371.65	1.32248	0.1718	7.69774	1.38491e-14	1.38074e-13
AAEL003210	13559.6	-0.790698	0.102738	-7.69628	1.40088e-14	1.39555e-13
AAEL000485	7614.66	0.601479	0.0781568	7.6958	1.40613e-14	1.39967e-13
AAEL006386	1456.3	1.16923	0.151972	7.69374	1.42901e-14	1.42132e-13
AAEL014378	2838.24	-1.43289	0.186371	-7.68838	1.49013e-14	1.48094e-13
AAEL000904	1247.19	-1.06534	0.138656	-7.68336	1.54965e-14	1.53887e-13
AAEL023750	877.003	-1.6625	0.216555	-7.67705	1.62798e-14	1.61533e-13
AAEL024268	105.082	-2.91017	0.379079	-7.67695	1.62921e-14	1.61533e-13
AAEL010491	3477.51	0.72639	0.0946741	7.67253	1.68633e-14	1.67065e-13
AAEL012078	2093.39	-1.17659	0.153428	-7.66868	1.73778e-14	1.72027e-13
AAEL007595	3373.79	-0.719181	0.093866	-7.66179	1.83355e-14	1.81364e-13
AAEL021022	118.866	4.57798	0.597759	7.65858	1.87996e-14	1.85808e-13
AAEL011989	20693.5	0.920136	0.120159	7.65762	1.89405e-14	1.87054e-13
AAEL027199	2352.52	1.05149	0.137338	7.6562	1.91512e-14	1.88987e-13
AAEL013109	4215.73	-1.63501	0.213606	-7.65433	1.94324e-14	1.91611e-13
AAEL005522	4121.67	0.786617	0.102801	7.65187	1.98082e-14	1.95164e-13
AAEL010505	1677.6	0.99116	0.129543	7.65118	1.99147e-14	1.96059e-13
AAEL014760	735.912	-1.69365	0.221451	-7.64799	2.04151e-14	2.00829e-13
AAEL014576	1137.94	1.82837	0.239162	7.6449	2.09101e-14	2.05537e-13
AAEL011112	817.674	-1.95846	0.256257	-7.64256	2.12941e-14	2.09148e-13
AAEL004041	931.305	-1.21231	0.158681	-7.63992	2.1736e-14	2.13321e-13
AAEL010073	2595.58	-0.696863	0.0912195	-7.63941	2.18225e-14	2.14004e-13
AAEL010732	1018.92	0.606187	0.0793618	7.63828	2.20149e-14	2.15722e-13
AAEL012835	7785.8	-1.27832	0.167397	-7.63645	2.23296e-14	2.18636e-13
AAEL000199	4078.95	1.52894	0.200311	7.63282	2.29672e-14	2.24704e-13
AAEL013052	4101.55	1.55187	0.20334	7.63186	2.31386e-14	2.26204e-13
AAEL011570	499.81	1.09415	0.143416	7.62924	2.36139e-14	2.30671e-13
AAEL007315	856.293	-1.79994	0.236007	-7.62665	2.40937e-14	2.35176e-13
AAEL026787	3231.13	-1.44406	0.189381	-7.62515	2.43756e-14	2.37743e-13
AAEL019898	12346.8	-1.06019	0.139062	-7.6239	2.46133e-14	2.39874e-13
AAEL005132	275.038	2.20022	0.288775	7.61913	2.55382e-14	2.48695e-13
AAEL012278	2686.3	1.13254	0.148657	7.61845	2.56738e-14	2.49823e-13
AAEL020936	4217.17	2.24836	0.295147	7.61779	2.58063e-14	2.50918e-13
AAEL011536	5356.83	1.55018	0.203567	7.61509	2.63502e-14	2.56008e-13
AAEL008418	350.725	-1.62284	0.213118	-7.61473	2.64246e-14	2.56533e-13
AAEL002107	10628.6	1.82298	0.239592	7.60869	2.76893e-14	2.68603e-13
AAEL008800	1087.85	1.20988	0.159045	7.60713	2.80244e-14	2.71644e-13
AAEL011728	3755.51	0.856261	0.112581	7.60572	2.83312e-14	2.74407e-13
AAEL002351	1556.6	-0.844361	0.111095	-7.60034	2.95363e-14	2.85859e-13
AAEL013896	2175.39	-0.571012	0.0751919	-7.59406	3.10027e-14	2.9982e-13
AAEL009533	444.098	-2.32232	0.305866	-7.59261	3.1353e-14	3.02974e-13
AAEL009756	792.355	-1.47227	0.19403	-7.58786	3.25238e-14	3.14047e-13
AAEL001992	5056.6	-1.18388	0.156028	-7.58763	3.25806e-14	3.14354e-13
AAEL000441	185.433	-2.67978	0.353287	-7.58527	3.31799e-14	3.19891e-13
AAEL019843	6416.85	-0.971667	0.128125	-7.58373	3.35755e-14	3.23457e-13
AAEL006507	1740.48	0.932006	0.1229	7.58345	3.36494e-14	3.2392e-13
AAEL010520	9233.66	0.631534	0.0833193	7.57968	3.464e-14	3.33201e-13
AAEL003275	3667.41	-0.842092	0.111141	-7.57676	3.54301e-14	3.40541e-13
AAEL006667	4847.19	1.36921	0.180716	7.57657	3.54797e-14	3.40757e-13
AAEL001295	387.241	-2.2296	0.2943	-7.57596	3.56492e-14	3.42124e-13
AAEL022938	841.085	1.73026	0.228561	7.57023	3.72556e-14	3.57267e-13
AAEL018057	445.311	-1.49614	0.197659	-7.56929	3.75261e-14	3.59587e-13
AAEL000721	267.655	-2.04844	0.270628	-7.56919	3.7555e-14	3.5959e-13
AAEL007653	1132.04	-4.50537	0.595271	-7.5686	3.7726e-14	3.60952e-13
AAEL014098	460.52	-1.24611	0.164687	-7.56657	3.83213e-14	3.66369e-13
AAEL012925	1531.5	-1.01929	0.134766	-7.5634	3.92666e-14	3.75121e-13
AAEL011898	5703.42	-1.39014	0.18381	-7.56289	3.94197e-14	3.76298e-13
AAEL001913	22425.1	-0.803542	0.106252	-7.56257	3.95168e-14	3.76939e-13
AAEL005910	3072.77	1.27153	0.168203	7.55953	4.04523e-14	3.8557e-13
AAEL014868	1539.02	-0.846068	0.111961	-7.55683	4.12997e-14	3.93348e-13
AAEL005401	207402	1.19855	0.158635	7.5554	4.17572e-14	3.97405e-13
AAEL014943	7625.45	0.840916	0.111386	7.54953	4.36835e-14	4.15423e-13
AAEL005391	7734.54	-1.02916	0.136325	-7.5493	4.37603e-14	4.15839e-13
AAEL011281	159.927	-2.31831	0.307135	-7.54818	4.4137e-14	4.19102e-13
AAEL001847	3080.74	-1.01588	0.134603	-7.54719	4.44741e-14	4.21983e-13
AAEL021977	1656.36	0.664159	0.0880795	7.54044	4.68381e-14	4.43826e-13
AAEL015283	3207.69	-1.06916	0.14179	-7.54042	4.68467e-14	4.43826e-13
AAEL007591	10661.3	3.56911	0.47364	7.53548	4.86527e-14	4.60589e-13
AAEL002723	15944.4	0.99893	0.132568	7.53522	4.87527e-14	4.61188e-13
AAEL026044	366.42	3.20831	0.42602	7.5309	5.03928e-14	4.76344e-13
AAEL013688	323.559	1.89297	0.251404	7.52958	5.09051e-14	4.80825e-13
AAEL011478	6751.94	0.862772	0.114729	7.52007	5.4748e-14	5.16735e-13
AAEL006409	1228.23	0.694744	0.09245	7.51481	5.69934e-14	5.37526e-13
AAEL005468	905.964	0.716127	0.0954408	7.50336	6.22014e-14	5.86204e-13
AAEL005816	2800.45	-0.950432	0.126711	-7.5008	6.34289e-14	5.97193e-13
AAEL012325	3245.35	0.745273	0.0993601	7.50073	6.34624e-14	5.97193e-13
AAEL006311	678.035	0.952138	0.126988	7.49783	6.48808e-14	6.10084e-13
AAEL008100	2593.34	0.786408	0.10498	7.491	6.83496e-14	6.4222e-13
AAEL005037	7853.45	1.47508	0.196967	7.48896	6.94197e-14	6.51788e-13
AAEL003762	775.047	1.15412	0.154181	7.48544	7.13075e-14	6.69014e-13
AAEL004740	277.164	1.79088	0.239419	7.48012	7.42556e-14	6.96153e-13
AAEL022169	1098.11	1.25362	0.167635	7.47829	7.52957e-14	7.05378e-13
AAEL002413	189.885	3.8518	0.515265	7.47538	7.69792e-14	7.20613e-13
AAEL005180	1425.85	0.99335	0.132963	7.47089	7.96525e-14	7.45083e-13
AAEL008680	891.639	1.09131	0.146201	7.46444	8.36568e-14	7.81958e-13
AAEL008542	10196.3	-0.66178	0.0886722	-7.46322	8.44331e-14	7.88628e-13
AAEL004034	647.018	1.08284	0.145098	7.46285	8.46681e-14	7.90236e-13
AAEL008206	314.791	12.4947	1.67453	7.46158	8.54897e-14	7.97312e-13
AAEL024720	5233.13	-0.760984	0.101995	-7.46099	8.58769e-14	8.00329e-13
AAEL011442	1289.93	0.782493	0.104958	7.45527	8.96819e-14	8.35171e-13
AAEL006056	1875.42	0.664769	0.0891693	7.45513	8.97761e-14	8.3543e-13
AAEL021615	938.689	1.50304	0.201658	7.45343	9.09443e-14	8.45674e-13
AAEL013998	273.952	1.31765	0.17685	7.45062	9.28999e-14	8.63221e-13
AAEL001103	2018.1	1.02294	0.137348	7.44779	9.49175e-14	8.81316e-13
AAEL019735	2229.25	0.864107	0.116028	7.44742	9.51859e-14	8.83157e-13
AAEL005150	735.184	1.22669	0.164821	7.44256	9.87502e-14	9.15551e-13
AAEL005208	1149.65	0.876521	0.117782	7.44192	9.92348e-14	9.19366e-13
AAEL006061	1642.09	1.32145	0.177685	7.43704	1.02966e-13	9.53227e-13
AAEL001188	2087.49	0.654661	0.0880445	7.43557	1.04115e-13	9.63162e-13
AAEL026458	31428.2	-1.34918	0.181484	-7.43413	1.05259e-13	9.73027e-13
AAEL024675	21514.8	-3.65436	0.491882	-7.42935	1.09135e-13	1.00812e-12
AAEL004053	640.84	1.04021	0.14003	7.42848	1.09855e-13	1.01402e-12
AAEL024127	129.669	-2.16433	0.291372	-7.42806	1.10201e-13	1.01588e-12
AAEL001052	9374.66	2.33014	0.313695	7.42804	1.10218e-13	1.01588e-12
AAEL026652	905.317	-0.986901	0.132873	-7.42739	1.10761e-13	1.02014e-12
AAEL014518	97.6936	-2.96099	0.398716	-7.42631	1.11672e-13	1.02778e-12
AAEL008135	1441.15	0.653189	0.087974	7.42479	1.12957e-13	1.03884e-12
AAEL005959	743.596	-1.86495	0.251194	-7.42434	1.13343e-13	1.04163e-12
AAEL013461	3016.04	-0.728336	0.0981043	-7.4241	1.1355e-13	1.04277e-12
AAEL011700	235.666	1.5187	0.204569	7.42393	1.13692e-13	1.04331e-12
AAEL001039	875.503	1.62044	0.218278	7.42376	1.13839e-13	1.0439e-12
AAEL005464	137.581	-2.49266	0.335831	-7.42235	1.15058e-13	1.0543e-12
AAEL001900	3531.57	-1.8563	0.250129	-7.42137	1.15913e-13	1.06137e-12
AAEL027504	13109.3	1.3519	0.182193	7.42019	1.16955e-13	1.07013e-12
AAEL002198	939.935	1.21614	0.163907	7.41967	1.17412e-13	1.07353e-12
AAEL014055	3239.85	-1.29102	0.174033	-7.41824	1.18687e-13	1.0844e-12
AAEL025517	3335.96	-1.14122	0.153931	-7.41383	1.22704e-13	1.12029e-12
AAEL029014	2625.9	-1.03425	0.139506	-7.41369	1.22837e-13	1.12069e-12
AAEL012549	38712	-1.32668	0.179008	-7.41129	1.25073e-13	1.14026e-12
AAEL002948	351.219	1.46239	0.197335	7.41071	1.25624e-13	1.14446e-12
AAEL019957	4082.51	1.39014	0.187622	7.40925	1.27014e-13	1.15628e-12
AAEL006450	1551.36	0.664993	0.0897611	7.40848	1.27759e-13	1.16222e-12
AAEL026096	219.931	1.62418	0.219237	7.40835	1.27884e-13	1.16251e-12
AAEL026751	22145.3	-1.55744	0.210234	-7.4081	1.28123e-13	1.16385e-12
AAEL023753	4272.81	1.72413	0.232786	7.40649	1.29689e-13	1.17722e-12
AAEL022615	695.45	1.8562	0.250739	7.40291	1.33236e-13	1.20854e-12
AAEL001715	15649.9	1.0334	0.139602	7.40252	1.33627e-13	1.21122e-12
AAEL004307	13151.9	-1.05713	0.142811	-7.40227	1.33881e-13	1.21264e-12
AAEL026852	2682.12	-0.707674	0.0956385	-7.39947	1.36732e-13	1.23757e-12
AAEL004074	4413.11	-0.901657	0.121875	-7.39822	1.38023e-13	1.24836e-12
AAEL001516	7603.38	0.790482	0.106878	7.39612	1.40219e-13	1.26732e-12
AAEL005690	1141.74	0.813302	0.110001	7.39361	1.42891e-13	1.29054e-12
AAEL004221	2113.33	-1.31885	0.178383	-7.39339	1.43135e-13	1.29181e-12
AAEL004235	2744.96	-0.821234	0.11109	-7.39253	1.44059e-13	1.29922e-12
AAEL008064	1887.07	1.14372	0.154719	7.39226	1.44357e-13	1.30097e-12
AAEL010829	786.026	1.13167	0.153129	7.39031	1.46487e-13	1.31922e-12
AAEL026486	352.415	2.8526	0.386081	7.38859	1.48395e-13	1.33545e-12
AAEL007065	40665.3	0.509802	0.069002	7.38821	1.48814e-13	1.33731e-12
AAEL003777	9588.36	-1.34362	0.181857	-7.38831	1.48711e-13	1.33731e-12
AAEL023166	890.493	1.5537	0.210419	7.38382	1.5381e-13	1.38121e-12
AAEL000674	1065.87	2.0283	0.274741	7.38258	1.55249e-13	1.39314e-12
AAEL027088	1971.98	0.995768	0.134889	7.38213	1.55771e-13	1.39683e-12
AAEL023508	780.155	-0.999167	0.135398	-7.3795	1.58891e-13	1.42379e-12
AAEL007547	8452.54	-1.10085	0.149206	-7.37801	1.60671e-13	1.43871e-12
AAEL004117	2357.6	-0.76413	0.10358	-7.3772	1.61649e-13	1.44644e-12
AAEL017345	319.185	2.27203	0.308179	7.37245	1.67524e-13	1.49795e-12
AAEL014080	1636.88	1.31154	0.177949	7.37034	1.70189e-13	1.52069e-12
AAEL000993	2616.44	-1.33609	0.181288	-7.37	1.70628e-13	1.52245e-12
AAEL009524	45.7743	-19.3023	2.61901	-7.37008	1.70523e-13	1.52245e-12
AAEL019812	1918.57	-1.16736	0.158423	-7.36864	1.72375e-13	1.53695e-12
AAEL006834	17957.9	-2.08819	0.28348	-7.36627	1.75462e-13	1.56337e-12
AAEL000982	796.019	0.84277	0.114434	7.36465	1.77606e-13	1.58134e-12
AAEL017395	2951.03	-0.929186	0.126295	-7.35725	1.87735e-13	1.67035e-12
AAEL014843	48096.2	2.31245	0.314367	7.35591	1.89636e-13	1.68607e-12
AAEL001818	390.878	-3.94039	0.535713	-7.35541	1.90342e-13	1.69115e-12
AAEL002651	889.924	-0.855099	0.116454	-7.34282	2.0914e-13	1.85685e-12
AAEL019488	1906.98	-0.653159	0.0889725	-7.34113	2.11791e-13	1.87907e-12
AAEL013394	1530.71	0.798375	0.108772	7.33987	2.13806e-13	1.8956e-12
AAEL000179	3877.89	0.749246	0.102265	7.32654	2.36163e-13	2.09235e-12
AAEL001846	105.48	4.38352	0.598336	7.32618	2.36802e-13	2.09653e-12
AAEL001382	1228.94	1.3678	0.186712	7.32572	2.37622e-13	2.10231e-12
AAEL004131	2378.3	1.61946	0.2211	7.32457	2.39672e-13	2.11896e-12
AAEL004306	1432.78	1.22978	0.167997	7.32024	2.4753e-13	2.18689e-12
AAEL023494	776.864	1.17974	0.161167	7.31996	2.48042e-13	2.18988e-12
AAEL008141	8488.45	-1.98273	0.27098	-7.3169	2.53773e-13	2.2389e-12
AAEL012261	3285.88	1.08124	0.147826	7.31428	2.58772e-13	2.2814e-12
AAEL007763	2466.05	0.935358	0.127962	7.30967	2.67793e-13	2.35928e-12
AAEL000654	25422.2	0.720899	0.098629	7.3092	2.68746e-13	2.36602e-12
AAEL024098	6426.15	1.29826	0.177662	7.3075	2.7216e-13	2.3944e-12
AAEL002184	7015.11	0.685959	0.093905	7.30482	2.77647e-13	2.44096e-12
AAEL020754	14819.2	-0.898795	0.123106	-7.30096	2.85723e-13	2.51021e-12
AAEL012515	2758.46	0.566774	0.0776462	7.29943	2.88983e-13	2.53708e-12
AAEL002886	41513	1.434	0.196565	7.2953	2.97992e-13	2.61434e-12
AAEL013027	71.9945	18.228	2.50036	7.29015	3.0962e-13	2.71446e-12
AAEL003801	3590.29	1.33277	0.182863	7.28835	3.1377e-13	2.74893e-12
AAEL006872	12168.4	0.808084	0.110879	7.28802	3.14549e-13	2.75383e-12
AAEL006117	2032.44	1.07531	0.147643	7.28317	3.26072e-13	2.85273e-12
AAEL009760	53276.5	-2.41561	0.332012	-7.27567	3.44699e-13	3.0136e-12
AAEL017562	1627.96	0.784854	0.1079	7.27388	3.49313e-13	3.05181e-12
AAEL009413	2003.53	1.13781	0.156498	7.27047	3.58237e-13	3.12761e-12
AAEL020502	268.578	-1.91515	0.263552	-7.26667	3.68459e-13	3.21462e-12
AAEL004778	1103.16	-1.32212	0.181982	-7.26515	3.72626e-13	3.24872e-12
AAEL019742	1101.36	1.25533	0.172825	7.26362	3.76852e-13	3.28329e-12
AAEL013702	4782.18	-0.807116	0.111183	-7.25937	3.8889e-13	3.38582e-12
AAEL012391	154.162	-2.24244	0.308937	-7.25859	3.91147e-13	3.40035e-12
AAEL001007	3484.6	-0.898713	0.123814	-7.2586	3.91125e-13	3.40035e-12
AAEL018055	1445.44	-0.92113	0.126903	-7.25851	3.9137e-13	3.40035e-12
AAEL003100	6.43963	-18.1986	2.50973	-7.25121	4.13074e-13	3.58644e-12
AAEL019830	1731.37	-1.16395	0.160624	-7.2464	4.27983e-13	3.71332e-12
AAEL014296	3982.25	-0.676539	0.0933648	-7.24619	4.28671e-13	3.71672e-12
AAEL021810	1027.84	0.863086	0.119137	7.24445	4.34186e-13	3.76195e-12
AAEL013771	586.281	1.45415	0.20082	7.24102	4.45319e-13	3.85575e-12
AAEL026716	6967.88	2.27342	0.314293	7.23345	4.70877e-13	4.07423e-12
AAEL014949	2138.5	1.66115	0.229667	7.23284	4.72987e-13	4.08968e-12
AAEL002833	39297.4	-1.06085	0.146701	-7.23141	4.7799e-13	4.1301e-12
AAEL007532	806.777	0.95734	0.132469	7.22691	4.94094e-13	4.26631e-12
AAEL027514	1154.71	-2.29043	0.316961	-7.22622	4.96611e-13	4.2851e-12
AAEL011688	641.832	-1.02549	0.14202	-7.22073	5.17109e-13	4.45892e-12
AAEL020614	2966.82	-1.10903	0.153642	-7.21828	5.26484e-13	4.53664e-12
AAEL021389	366.324	1.11228	0.154113	7.2173	5.30305e-13	4.56644e-12
AAEL002399	9563.26	1.22853	0.170223	7.21717	5.30792e-13	4.5675e-12
AAEL021395	3303.75	-1.10665	0.153349	-7.21652	5.3335e-13	4.58638e-12
AAEL012167	780.279	1.1874	0.164542	7.21639	5.33869e-13	4.58769e-12
AAEL025860	203.72	-1.59074	0.220556	-7.21242	5.49649e-13	4.72007e-12
AAEL019459	1868.91	1.06606	0.147831	7.2113	5.54189e-13	4.75581e-12
AAEL001412	1426.92	1.76624	0.244949	7.21066	5.56812e-13	4.77507e-12
AAEL026960	674.114	-1.63879	0.227277	-7.21057	5.57196e-13	4.77509e-12
AAEL013679	1699.48	1.14885	0.15938	7.20826	5.66727e-13	4.85347e-12
AAEL014959	6834.19	-0.607038	0.0842746	-7.20309	5.88622e-13	5.03755e-12
AAEL027028	2695.83	-1.25316	0.17402	-7.20123	5.96737e-13	5.10352e-12
AAEL010362	302.904	1.45745	0.20249	7.19761	6.12751e-13	5.23691e-12
AAEL000815	3889.66	0.819063	0.11382	7.19612	6.19488e-13	5.2909e-12
AAEL000902	24569.9	2.19198	0.304659	7.19488	6.25167e-13	5.33578e-12
AAEL017071	5595.7	1.35821	0.188807	7.19368	6.30682e-13	5.3792e-12
AAEL005825	953.377	0.753737	0.104891	7.1859	6.67661e-13	5.69074e-12
AAEL006054	266.311	-2.17742	0.303079	-7.18433	6.75352e-13	5.75239e-12
AAEL003989	2709.73	-0.629833	0.0877192	-7.18011	6.96577e-13	5.92916e-12
AAEL019562	1275.63	-1.42728	0.198815	-7.17895	7.02509e-13	5.9756e-12
AAEL014262	763.041	0.952661	0.132735	7.17718	7.11626e-13	6.04906e-12
AAEL028052	2658.77	1.20807	0.168413	7.1733	7.32109e-13	6.21897e-12
AAEL020170	456.263	0.935233	0.130398	7.17216	7.38228e-13	6.26671e-12
AAEL011063	7948.92	-0.844194	0.117719	-7.17123	7.43246e-13	6.30506e-12
AAEL008841	11048.9	1.82825	0.255114	7.1664	7.69958e-13	6.52285e-12
AAEL023332	13276.2	1.41694	0.197719	7.16644	7.69733e-13	6.52285e-12
AAEL001580	683.372	2.06254	0.287844	7.16546	7.75265e-13	6.56339e-12
AAEL015199	1384.82	1.26775	0.176932	7.16515	7.77018e-13	6.57381e-12
AAEL003713	4259.81	-1.10657	0.154445	-7.16478	7.79128e-13	6.58722e-12
AAEL007694	2001.38	-0.94066	0.131298	-7.16432	7.81758e-13	6.60501e-12
AAEL006247	1836.68	-1.1771	0.164461	-7.15731	8.2277e-13	6.94686e-12
AAEL006207	3118.94	2.80923	0.392678	7.15403	8.42678e-13	7.11017e-12
AAEL006521	649.651	1.23621	0.172881	7.1506	8.64011e-13	7.28527e-12
AAEL007422	763.065	0.844103	0.118063	7.14958	8.70427e-13	7.33446e-12
AAEL027621	55.0487	-3.95069	0.552599	-7.14929	8.72297e-13	7.34529e-12
AAEL013445	595.019	-0.831479	0.11642	-7.14207	9.1935e-13	7.73633e-12
AAEL017226	32599.9	-0.625082	0.087554	-7.13939	9.37472e-13	7.88354e-12
AAEL024350	1937.7	0.772023	0.108245	7.13216	9.88067e-13	8.30346e-12
AAEL013119	3226.14	0.888628	0.12464	7.12953	1.00709e-12	8.45767e-12
AAEL005635	1995.62	1.24416	0.174581	7.12656	1.0291e-12	8.63674e-12
AAEL002248	1026.57	-1.00372	0.140858	-7.12575	1.03514e-12	8.68165e-12
AAEL011390	951.786	1.31338	0.184327	7.12524	1.03897e-12	8.70793e-12
AAEL026229	580.929	-1.61886	0.227306	-7.12196	1.06404e-12	8.91213e-12
AAEL002077	8476.62	0.447196	0.0628756	7.1124	1.14043e-12	9.5456e-12
AAEL011338	139.011	2.12238	0.298502	7.11009	1.15964e-12	9.69989e-12
AAEL009320	10416.8	1.34331	0.188981	7.10818	1.17582e-12	9.82223e-12
AAEL008639	7918.42	-0.953515	0.134142	-7.10827	1.17507e-12	9.82223e-12
AAEL009129	16267.5	-0.856559	0.120527	-7.10681	1.18757e-12	9.9138e-12
AAEL010768	759.007	0.993932	0.139945	7.10231	1.22686e-12	1.0235e-11
AAEL000137	307.859	1.27554	0.179622	7.10124	1.23646e-12	1.03082e-11
AAEL007806	60.0608	6.27487	0.884501	7.09425	1.30053e-12	1.08351e-11
AAEL013151	352.811	1.4611	0.205961	7.09406	1.30232e-12	1.08429e-11
AAEL019563	11707.2	-1.09083	0.153778	-7.09354	1.30721e-12	1.08764e-11
AAEL006885	69357.8	0.494401	0.0697249	7.09074	1.33394e-12	1.10915e-11
AAEL009217	1341.36	1.10398	0.155695	7.09064	1.33493e-12	1.10923e-11
AAEL006279	1809.74	-3.01078	0.42469	-7.08936	1.34737e-12	1.11883e-11
AAEL008216	20821.3	0.861413	0.121539	7.08757	1.36485e-12	1.1326e-11
AAEL026671	772.507	-0.907085	0.128002	-7.08649	1.37559e-12	1.14076e-11
AAEL005944	716.612	1.21385	0.171323	7.08515	1.38897e-12	1.1511e-11
AAEL023829	497.219	1.49039	0.210638	7.07562	1.48779e-12	1.23218e-11
AAEL008434	12748.2	1.01995	0.144193	7.07354	1.51034e-12	1.25004e-11
AAEL013652	1425.03	1.13664	0.160767	7.07008	1.54847e-12	1.28075e-11
AAEL011988	973.556	0.943792	0.133498	7.06973	1.55235e-12	1.28311e-11
AAEL003424	10522.4	-1.4949	0.211497	-7.06817	1.56993e-12	1.29679e-11
AAEL005666	13618.5	1.0201	0.144336	7.06757	1.57668e-12	1.30151e-11
AAEL012520	299.084	1.77409	0.251024	7.06742	1.57844e-12	1.30211e-11
AAEL010753	308.042	-1.15816	0.163877	-7.06725	1.5803e-12	1.30279e-11
AAEL020203	1108.57	-0.969357	0.137265	-7.06196	1.64166e-12	1.35249e-11
AAEL017133	2237.18	1.22439	0.17366	7.05051	1.78269e-12	1.46771e-11
AAEL005017	1788.61	-0.962423	0.136547	-7.0483	1.81113e-12	1.49015e-11
AAEL012852	6053.98	6.87131	0.974948	7.04788	1.81668e-12	1.49374e-11
AAEL026493	452.465	-0.849582	0.120584	-7.04559	1.84675e-12	1.51747e-11
AAEL021751	1202.12	0.84636	0.120196	7.04147	1.90219e-12	1.562e-11
AAEL019593	563.795	1.11726	0.158685	7.04076	1.91192e-12	1.56897e-11
AAEL005803	146.128	2.06566	0.29344	7.03947	1.92966e-12	1.58249e-11
AAEL014273	5007.58	0.917506	0.130351	7.03875	1.93978e-12	1.58976e-11
AAEL005262	8124.85	-0.758559	0.107798	-7.03684	1.96642e-12	1.61054e-11
AAEL022282	8583.22	0.880466	0.125169	7.0342	2.00408e-12	1.64032e-11
AAEL010321	3447.69	1.4197	0.201887	7.03212	2.03416e-12	1.66385e-11
AAEL007063	1967.55	2.06691	0.293982	7.03074	2.05438e-12	1.6793e-11
AAEL007650	10922	0.962695	0.136989	7.02752	2.10233e-12	1.71738e-11
AAEL000922	588.061	1.44769	0.206008	7.02734	2.10513e-12	1.71855e-11
AAEL005001	8567.35	-4.57684	0.651374	-7.02644	2.11869e-12	1.7285e-11
AAEL011568	2857.57	0.890472	0.126742	7.02585	2.1276e-12	1.73464e-11
AAEL010339	742.726	1.31017	0.186719	7.01681	2.26995e-12	1.8495e-11
AAEL011277	2498.69	-0.583169	0.0831188	-7.01609	2.28161e-12	1.8578e-11
AAEL015052	572.606	0.894057	0.12744	7.01549	2.29147e-12	1.86462e-11
AAEL012939	10295.6	1.37347	0.19579	7.01501	2.29939e-12	1.86985e-11
AAEL001334	1638.63	0.874131	0.124671	7.01151	2.35757e-12	1.91592e-11
AAEL005839	3699.27	-2.27554	0.325159	-6.99824	2.5919e-12	2.105e-11
AAEL010799	7771.4	-0.749827	0.107223	-6.99318	2.6873e-12	2.18107e-11
AAEL024110	94.2111	1.89038	0.270426	6.99038	2.74133e-12	2.22348e-11
AAEL001638	791.964	0.80046	0.114543	6.98829	2.78247e-12	2.25451e-11
AAEL008806	2447.8	-1.00648	0.144025	-6.98826	2.78317e-12	2.25451e-11
AAEL012094	4357.83	0.73516	0.105205	6.98787	2.79097e-12	2.25938e-11
AAEL019819	4930.87	1.16428	0.166668	6.98562	2.83596e-12	2.29431e-11
AAEL001200	997.832	0.777605	0.111331	6.98461	2.85654e-12	2.30948e-11
AAEL000418	695.037	1.00535	0.143954	6.98381	2.87271e-12	2.32106e-11
AAEL019559	10992.3	-0.724898	0.103874	-6.97861	2.98116e-12	2.40714e-11
AAEL012865	4019.89	1.06825	0.153142	6.97556	3.04658e-12	2.45838e-11
AAEL006091	5908.07	0.497348	0.0713072	6.97473	3.06458e-12	2.47133e-11
AAEL006283	181.338	-2.01295	0.288622	-6.97433	3.0733e-12	2.47676e-11
AAEL001682	1082.87	1.03577	0.148608	6.96977	3.17469e-12	2.55684e-11
AAEL020106	261.109	1.18142	0.169613	6.96539	3.27494e-12	2.63588e-11
AAEL004620	3939.63	0.438537	0.0629969	6.96124	3.37281e-12	2.71292e-11
AAEL002817	232.207	1.86565	0.268142	6.95769	3.45887e-12	2.78037e-11
AAEL006050	1583.17	0.622026	0.0894023	6.9576	3.46114e-12	2.78041e-11
AAEL023074	171.935	-2.51085	0.360997	-6.95533	3.51745e-12	2.82384e-11
AAEL013284	1.48374e+06	3.72191	0.535127	6.95519	3.52078e-12	2.82471e-11
AAEL009636	4017.65	0.532782	0.0766074	6.95471	3.533e-12	2.83271e-11
AAEL011564	6267.64	1.48581	0.213677	6.95352	3.56287e-12	2.85483e-11
AAEL010590	7557.1	-1.04554	0.150422	-6.9507	3.6348e-12	2.91062e-11
AAEL013760	7023.1	-0.689967	0.0993507	-6.94476	3.79112e-12	3.03386e-11
AAEL021276	6241.74	-0.993025	0.143004	-6.94406	3.80993e-12	3.04697e-11
AAEL005500	3374.14	0.670937	0.0966591	6.94127	3.88593e-12	3.10578e-11
AAEL020440	198.395	-2.15961	0.311221	-6.93917	3.94408e-12	3.15025e-11
AAEL002411	32079.4	0.875142	0.126167	6.93636	4.02324e-12	3.21144e-11
AAEL019528	5138.93	-1.12161	0.161717	-6.93562	4.04445e-12	3.22632e-11
AAEL008692	2876.87	1.50728	0.217352	6.93471	4.07062e-12	3.24514e-11
AAEL008250	708.152	-1.03998	0.150066	-6.93016	4.20361e-12	3.34904e-11
AAEL007355	860.054	1.02098	0.147353	6.92884	4.24312e-12	3.37837e-11
AAEL026994	422.764	-1.83495	0.264911	-6.92665	4.30916e-12	3.42878e-11
AAEL012816	502.673	1.63065	0.23568	6.91889	4.55181e-12	3.61957e-11
AAEL000235	3902.65	-0.840073	0.121513	-6.91347	4.72937e-12	3.75839e-11
AAEL013959	695.246	-1.7802	0.257542	-6.91225	4.77026e-12	3.78849e-11
AAEL000682	3847.75	-0.898654	0.130153	-6.90458	5.0351e-12	3.99629e-11
AAEL021172	44.9986	-7.61876	1.10389	-6.90174	5.13702e-12	4.07461e-11
AAEL004010	8633.67	0.802167	0.116242	6.90085	5.16907e-12	4.09611e-11
AAEL003829	9383.46	-0.438453	0.0635365	-6.90081	5.17064e-12	4.09611e-11
AAEL024807	10345.6	-0.804088	0.11656	-6.89849	5.25586e-12	4.161e-11
AAEL003366	1759.24	0.540276	0.0783296	6.89748	5.29338e-12	4.18806e-11
AAEL004569	419.508	-1.45215	0.210633	-6.89424	5.41522e-12	4.28177e-11
AAEL004297	15545.4	1.09627	0.159015	6.89414	5.41928e-12	4.28228e-11
AAEL003519	2103.51	-0.685986	0.0995172	-6.89314	5.4574e-12	4.3097e-11
AAEL007637	1210.82	-0.908368	0.131788	-6.89263	5.47688e-12	4.32237e-11
AAEL027615	75.9829	2.40457	0.349102	6.88786	5.66386e-12	4.46713e-11
AAEL002777	1490.68	-1.02297	0.148563	-6.88579	5.74658e-12	4.52953e-11
AAEL003492	13898.8	0.875484	0.127199	6.8828	5.86869e-12	4.61998e-11
AAEL013229	6699.69	1.56854	0.227892	6.88283	5.86765e-12	4.61998e-11
AAEL001925	829.728	-1.13257	0.164564	-6.88223	5.89223e-12	4.63562e-11
AAEL006006	1236	-1.74332	0.25342	-6.87919	6.01927e-12	4.7326e-11
AAEL009547	1837.84	-0.636713	0.0925581	-6.87907	6.02452e-12	4.73376e-11
AAEL012756	3866.44	-1.10789	0.161156	-6.87463	6.21493e-12	4.88033e-11
AAEL000394	1128.07	0.89257	0.129892	6.87162	6.34753e-12	4.98135e-11
AAEL021026	347.692	-1.24077	0.180622	-6.86945	6.44489e-12	5.0546e-11
AAEL000716	2626.3	-0.824725	0.120064	-6.86901	6.46472e-12	5.06698e-11
AAEL007473	4067.12	-1.3474	0.196351	-6.86219	6.78126e-12	5.31178e-11
AAEL002377	2737.34	1.50651	0.219596	6.86035	6.86937e-12	5.37744e-11
AAEL006309	2681.25	0.525387	0.0766213	6.85692	7.03586e-12	5.50435e-11
AAEL011389	952.936	0.925216	0.134953	6.85587	7.08816e-12	5.54182e-11
AAEL000435	489.406	1.00338	0.146402	6.85362	7.20033e-12	5.62601e-11
AAEL027459	1276.58	-1.10633	0.16146	-6.85199	7.28289e-12	5.68698e-11
AAEL000077	4439.98	0.707435	0.10325	6.85165	7.30046e-12	5.69717e-11
AAEL001446	4759.84	-1.92383	0.280806	-6.85111	7.32806e-12	5.71516e-11
AAEL009302	1062.04	0.902841	0.131875	6.84617	7.58554e-12	5.9123e-11
AAEL012456	2947.27	-0.84314	0.123296	-6.83833	8.01205e-12	6.24086e-11
AAEL020020	227.858	-1.11461	0.163059	-6.83563	8.16482e-12	6.35592e-11
AAEL024503	74.1991	6.48086	0.948242	6.83461	8.22307e-12	6.3973e-11
AAEL023521	19449.1	1.2407	0.181636	6.83068	8.45117e-12	6.5707e-11
AAEL029010	848.48	-1.63599	0.23965	-6.82657	8.69696e-12	6.75762e-11
AAEL020945	113.961	2.42913	0.355912	6.82508	8.7879e-12	6.82405e-11
AAEL027018	408.974	1.03629	0.15184	6.82488	8.79986e-12	6.82912e-11
AAEL019473	1679.81	-0.96254	0.141148	-6.81935	9.14527e-12	7.0928e-11
AAEL014840	406.382	2.50507	0.367619	6.8143	9.47221e-12	7.34184e-11
AAEL009381	3128.08	-1.09032	0.16014	-6.80853	9.86003e-12	7.63773e-11
AAEL006138	8798.59	6.93033	1.01811	6.80702	9.96403e-12	7.71353e-11
AAEL007442	1424.71	-1.70243	0.250157	-6.80544	1.00739e-11	7.79375e-11
AAEL001642	875.192	-1.19481	0.175631	-6.80295	1.02501e-11	7.92522e-11
AAEL003246	3248.48	0.856947	0.125982	6.80213	1.03083e-11	7.96534e-11
AAEL009117	3103.29	-1.34341	0.197541	-6.80069	1.04116e-11	8.04019e-11
AAEL000467	1034.87	1.3119	0.192951	6.79914	1.05248e-11	8.12267e-11
AAEL002418	549.985	1.28946	0.189719	6.79667	1.07062e-11	8.25758e-11
AAEL008171	9703.48	0.563468	0.082911	6.79605	1.07523e-11	8.28805e-11
AAEL014368	591.371	1.05546	0.155335	6.79473	1.08513e-11	8.35926e-11
AAEL027692	253.746	1.72248	0.253506	6.79464	1.08582e-11	8.35941e-11
AAEL009131	6337.8	-2.38215	0.350736	-6.79186	1.10693e-11	8.51675e-11
AAEL017371	1035.42	1.04144	0.153387	6.78965	1.1241e-11	8.63824e-11
AAEL010316	1454.75	-0.861103	0.126826	-6.78965	1.12404e-11	8.63824e-11
AAEL007293	8067.53	-0.662167	0.0975416	-6.78856	1.13256e-11	8.69797e-11
AAEL008151	213.422	-1.55145	0.228669	-6.7847	1.16327e-11	8.92838e-11
AAEL001797	918.151	0.892777	0.131616	6.78318	1.17555e-11	9.01712e-11
AAEL003952	733.053	-0.842124	0.124181	-6.78141	1.19012e-11	9.12332e-11
AAEL006948	2377.48	-0.651581	0.0961306	-6.77809	1.21778e-11	9.32963e-11
AAEL010854	1939.47	1.34924	0.199085	6.7772	1.22525e-11	9.38118e-11
AAEL022692	409.565	-1.36301	0.20118	-6.77505	1.24361e-11	9.51596e-11
AAEL004095	1125.88	-0.916981	0.135362	-6.77429	1.25016e-11	9.5602e-11
AAEL005215	2650.72	-0.717017	0.105883	-6.77178	1.27203e-11	9.72158e-11
AAEL010337	1395.98	-2.11448	0.312507	-6.76619	1.3222e-11	1.00989e-10
AAEL002469	2088.2	-1.27945	0.189399	-6.75532	1.42517e-11	1.08787e-10
AAEL025750	119.596	3.83351	0.567732	6.75234	1.45484e-11	1.10984e-10
AAEL005510	578.942	1.03396	0.153154	6.75111	1.46716e-11	1.11788e-10
AAEL012025	1432.95	1.19783	0.177425	6.75117	1.46659e-11	1.11788e-10
AAEL024053	3816.2	-0.677018	0.100302	-6.74981	1.48041e-11	1.1273e-10
AAEL009981	1254.78	0.842698	0.124941	6.74475	1.53293e-11	1.16659e-10
AAEL010991	9800.83	1.1463	0.170047	6.74107	1.5723e-11	1.19582e-10
AAEL016986	574.211	1.16178	0.172348	6.74089	1.57422e-11	1.19656e-10
AAEL001030	1781.21	1.06995	0.158745	6.74004	1.58345e-11	1.20285e-10
AAEL017135	3434.7	-0.437813	0.0649621	-6.73951	1.58921e-11	1.2065e-10
AAEL018061	624.377	3.48636	0.517373	6.73858	1.59942e-11	1.21351e-10
AAEL014900	765.505	0.946318	0.140443	6.73812	1.60453e-11	1.21666e-10
AAEL005508	4448.27	0.764944	0.113546	6.73686	1.61848e-11	1.22649e-10
AAEL001496	1719.68	0.63606	0.0944827	6.73203	1.67311e-11	1.26713e-10
AAEL011638	74.7285	-2.87919	0.427991	-6.72722	1.72933e-11	1.30892e-10
AAEL003549	299.726	-1.27541	0.189619	-6.72616	1.74193e-11	1.31722e-10
AAEL012368	915.679	1.00495	0.14941	6.72613	1.74239e-11	1.31722e-10
AAEL001497	2056.03	0.647248	0.0962631	6.72373	1.77126e-11	1.33824e-10
AAEL013739	11069.8	0.554536	0.0825016	6.72152	1.79843e-11	1.35795e-10
AAEL020983	500.935	2.47876	0.368822	6.72075	1.80798e-11	1.36434e-10
AAEL008719	922.762	1.04864	0.156099	6.71774	1.84565e-11	1.39194e-10
AAEL010453	1566.89	0.92837	0.138233	6.716	1.86783e-11	1.40781e-10
AAEL025258	544.457	1.41742	0.211187	6.71171	1.92359e-11	1.44897e-10
AAEL006748	1402.19	0.791883	0.118026	6.70937	1.95462e-11	1.47147e-10
AAEL023070	5604.94	1.07103	0.159639	6.70911	1.95819e-11	1.47327e-10
AAEL012502	18158.4	1.43542	0.213956	6.70892	1.96066e-11	1.47425e-10
AAEL003238	340.688	1.15286	0.171927	6.70552	2.00689e-11	1.5081e-10
AAEL014410	315.848	0.900629	0.134316	6.70528	2.01019e-11	1.50878e-10
AAEL018351	4514.57	-1.08377	0.16163	-6.70529	2.01004e-11	1.50878e-10
AAEL022867	5227.48	-1.2111	0.180624	-6.70509	2.01278e-11	1.50982e-10
AAEL006476	3617.17	-0.988852	0.147504	-6.70391	2.0291e-11	1.52116e-10
AAEL004437	605.127	-1.16388	0.173637	-6.70298	2.04209e-11	1.52999e-10
AAEL003005	1133.67	-0.986378	0.147159	-6.70282	2.04439e-11	1.5308e-10
AAEL008374	11305.3	-0.631793	0.0942685	-6.70206	2.05507e-11	1.53788e-10
AAEL012156	520.363	0.885275	0.132097	6.70169	2.0603e-11	1.54087e-10
AAEL009965	315.426	8.52282	1.27194	6.70065	2.07497e-11	1.55092e-10
AAEL009377	9230.68	0.472198	0.0705076	6.69713	2.12555e-11	1.58779e-10
AAEL009432	12431.5	1.30483	0.194893	6.69512	2.15492e-11	1.60877e-10
AAEL013825	1667.78	0.714482	0.106724	6.69468	2.1614e-11	1.61265e-10
AAEL003709	4298.68	1.20354	0.179868	6.69124	2.21295e-11	1.65013e-10
AAEL021736	1510.8	0.738831	0.110468	6.68821	2.25916e-11	1.68359e-10
AAEL007349	15057.9	-1.16885	0.174895	-6.68316	2.33838e-11	1.74159e-10
AAEL001198	1199.69	-1.1709	0.175372	-6.67666	2.4445e-11	1.81955e-10
AAEL004430	1177.98	1.15276	0.172669	6.67614	2.45317e-11	1.82492e-10
AAEL025849	647.588	0.953702	0.142897	6.67405	2.48841e-11	1.85005e-10
AAEL022285	342034	-1.15713	0.173453	-6.67112	2.53851e-11	1.88618e-10
AAEL005896	568.978	-1.25683	0.188447	-6.66941	2.56832e-11	1.9072e-10
AAEL012866	9221.56	1.95317	0.292913	6.6681	2.59145e-11	1.92324e-10
AAEL011927	1913.13	-0.723167	0.10852	-6.66391	2.66633e-11	1.97648e-10
AAEL008740	3767.8	0.64924	0.0974262	6.66391	2.66629e-11	1.97648e-10
AAEL006236	1617.32	-0.88668	0.133102	-6.66164	2.70787e-11	2.00609e-10
AAEL006321	8503.73	1.29456	0.194427	6.65833	2.76965e-11	2.05065e-10
AAEL011983	1181.83	-0.752433	0.113066	-6.6548	2.83691e-11	2.09921e-10
AAEL011105	10174.6	-0.664265	0.0998431	-6.65309	2.87009e-11	2.12252e-10
AAEL001594	308.622	-3.32373	0.500123	-6.64581	3.01552e-11	2.22875e-10
AAEL010689	2491.67	0.667519	0.100509	6.64141	3.10689e-11	2.29493e-10
AAEL012700	4066.4	1.57894	0.238101	6.63136	3.32613e-11	2.45497e-10
AAEL006587	510.378	-1.18712	0.17902	-6.63121	3.3294e-11	2.45497e-10
AAEL011822	122.834	3.14858	0.474807	6.63128	3.32785e-11	2.45497e-10
AAEL013554	2615.08	3.86393	0.582697	6.63112	3.33154e-11	2.45511e-10
AAEL004551	1593.08	-0.99468	0.150147	-6.62469	3.47969e-11	2.56278e-10
AAEL005721	470.056	-0.865743	0.13069	-6.62439	3.48682e-11	2.56652e-10
AAEL023267	75.9662	-22.1443	3.34301	-6.62406	3.49467e-11	2.5708e-10
AAEL003875	2335.29	-0.840124	0.126834	-6.62381	3.50054e-11	2.57362e-10
AAEL018276	1189.73	0.765485	0.115575	6.62326	3.51369e-11	2.58177e-10
AAEL000590	2908.86	-1.884	0.28462	-6.61935	3.60793e-11	2.64947e-10
AAEL022017	128.089	-1.62307	0.245208	-6.61913	3.61312e-11	2.65173e-10
AAEL026666	70.7215	-21.9889	3.32268	-6.61784	3.64497e-11	2.67355e-10
AAEL019854	1853.34	-0.682946	0.10324	-6.6151	3.7129e-11	2.72179e-10
AAEL011466	245.911	-1.82432	0.27585	-6.61345	3.7546e-11	2.75075e-10
AAEL026349	34.9549	7.83174	1.1848	6.61021	3.83783e-11	2.81009e-10
AAEL011326	1294.03	0.552323	0.0835643	6.60956	3.85463e-11	2.82075e-10
AAEL003046	77446.3	-0.920693	0.139315	-6.6087	3.87702e-11	2.83548e-10
AAEL007708	203.767	1.58159	0.239353	6.60776	3.9018e-11	2.85194e-10
AAEL008500	13062.9	0.894626	0.135427	6.60597	3.94917e-11	2.88489e-10
AAEL006978	4463.45	-1.39319	0.210915	-6.60543	3.96359e-11	2.89374e-10
AAEL009614	2039.73	-0.679008	0.102863	-6.60112	4.08075e-11	2.97755e-10
AAEL007050	4561.29	-1.22646	0.185826	-6.60007	4.10962e-11	2.99687e-10
AAEL014871	2452.39	1.07415	0.162823	6.59704	4.19456e-11	3.05705e-10
AAEL003056	26689.5	-0.750386	0.113751	-6.59673	4.20328e-11	3.06162e-10
AAEL007798	933.263	-0.931591	0.141226	-6.59647	4.21059e-11	3.06517e-10
AAEL022651	6121.97	-1.35885	0.206008	-6.59609	4.22131e-11	3.0712e-10
AAEL026201	226.313	-1.50562	0.228284	-6.59539	4.24149e-11	3.08409e-10
AAEL007944	5274.63	0.630311	0.0955925	6.59373	4.289e-11	3.11684e-10
AAEL003954	4348.06	-1.57008	0.238166	-6.59239	4.32794e-11	3.14332e-10
AAEL013139	26994.9	0.541694	0.0822615	6.58502	4.54822e-11	3.3014e-10
AAEL006135	513.612	1.29389	0.19653	6.58368	4.58959e-11	3.32951e-10
AAEL005879	14101.5	-0.991682	0.150661	-6.58223	4.63458e-11	3.3602e-10
AAEL028088	1715.29	-1.59203	0.241913	-6.581	4.673e-11	3.38611e-10
AAEL010057	2845.2	0.781809	0.118822	6.57968	4.71469e-11	3.41435e-10
AAEL010015	2442.83	-0.887772	0.135012	-6.57549	4.84931e-11	3.50982e-10
AAEL011177	202.074	2.47211	0.376103	6.57295	4.93266e-11	3.56809e-10
AAEL027228	118.956	1.85682	0.282523	6.57227	4.95523e-11	3.58235e-10
AAEL011347	5052.83	-1.10076	0.167596	-6.56794	5.10155e-11	3.68602e-10
AAEL007238	2951.34	1.34541	0.204855	6.5676	5.11327e-11	3.69236e-10
AAEL009374	234.87	1.70917	0.260258	6.56723	5.12602e-11	3.69944e-10
AAEL000118	1096.28	0.808177	0.123075	6.56656	5.14906e-11	3.71394e-10
AAEL001277	5646.49	1.08029	0.164528	6.566	5.16837e-11	3.72573e-10
AAEL006938	201.74	1.20634	0.183769	6.56446	5.22213e-11	3.76233e-10
AAEL005725	443.531	0.99952	0.152318	6.56205	5.30736e-11	3.82154e-10
AAEL018146	247.255	1.60734	0.244982	6.56105	5.34315e-11	3.84511e-10
AAEL023516	2701.54	1.12396	0.171315	6.56077	5.35323e-11	3.85016e-10
AAEL003922	470.532	1.16024	0.176905	6.55857	5.43245e-11	3.90491e-10
AAEL021755	1855.94	-1.27506	0.194415	-6.55842	5.43793e-11	3.90661e-10
AAEL020530	2025.02	1.5207	0.231931	6.55668	5.5019e-11	3.95031e-10
AAEL006188	263.293	-1.88003	0.286772	-6.55584	5.53282e-11	3.97024e-10
AAEL008391	228.006	1.26276	0.192671	6.55398	5.60216e-11	4.0177e-10
AAEL010302	334.194	-0.965083	0.147294	-6.5521	5.67351e-11	4.06655e-10
AAEL006661	1254.95	0.89669	0.136878	6.55102	5.71437e-11	4.09118e-10
AAEL014282	1137.81	0.702323	0.107208	6.55105	5.71336e-11	4.09118e-10
AAEL021941	863.076	-1.28791	0.19662	-6.55024	5.74456e-11	4.11045e-10
AAEL007134	1552.52	-1.9838	0.302917	-6.54897	5.79338e-11	4.14303e-10
AAEL004877	244.5	1.7671	0.269881	6.5477	5.84296e-11	4.17373e-10
AAEL027567	538.503	0.992741	0.151617	6.5477	5.84287e-11	4.17373e-10
AAEL009274	1847.12	0.901815	0.137795	6.5446	5.96567e-11	4.25896e-10
AAEL003534	2408.17	-1.39489	0.213258	-6.54087	6.11616e-11	4.36393e-10
AAEL010879	1219.29	-0.696326	0.10647	-6.54011	6.14733e-11	4.38368e-10
AAEL000550	849.146	-1.15533	0.17668	-6.53913	6.18769e-11	4.40996e-10
AAEL025976	1635	-1.08367	0.165726	-6.53896	6.19485e-11	4.41256e-10
AAEL002551	16244.7	-0.544114	0.0832315	-6.53735	6.26172e-11	4.45767e-10
AAEL002850	744.723	-1.0961	0.167678	-6.53691	6.28042e-11	4.46845e-10
AAEL007823	3034.38	-0.676686	0.103553	-6.53468	6.37436e-11	4.53055e-10
AAEL011102	9419.04	-0.778754	0.119173	-6.53467	6.37492e-11	4.53055e-10
AAEL006071	2336.78	-1.09078	0.166943	-6.53384	6.41025e-11	4.55309e-10
AAEL013462	150.397	-1.85237	0.283612	-6.53133	6.51883e-11	4.62499e-10
AAEL027357	1272.24	0.940648	0.14402	6.53138	6.51686e-11	4.62499e-10
AAEL004554	761.621	0.913863	0.14001	6.52714	6.70376e-11	4.7535e-10
AAEL011934	1837.1	-0.668988	0.102509	-6.52614	6.74858e-11	4.78259e-10
AAEL005204	1851.82	1.62672	0.249396	6.52262	6.9089e-11	4.89345e-10
AAEL021091	235.251	-2.53932	0.38941	-6.52094	6.98691e-11	4.94592e-10
AAEL028028	171.136	1.83664	0.281673	6.52047	7.00862e-11	4.95849e-10
AAEL003136	1426.4	0.987528	0.151504	6.51816	7.11763e-11	5.03278e-10
AAEL022995	1603.17	-3.45392	0.530038	-6.51636	7.20319e-11	5.09042e-10
AAEL002334	16687.2	0.515676	0.0791507	6.51512	7.26331e-11	5.13002e-10
AAEL023532	494.989	-2.77491	0.426277	-6.50963	7.53381e-11	5.31808e-10
AAEL009853	394.82	1.73581	0.266783	6.50644	7.69516e-11	5.42893e-10
AAEL002435	4244.82	-0.563612	0.0867034	-6.50046	8.00727e-11	5.64595e-10
AAEL005618	40939.9	-0.903077	0.139052	-6.49451	8.33055e-11	5.87061e-10
AAEL007038	518.766	-1.04467	0.160869	-6.49393	8.36234e-11	5.88971e-10
AAEL021813	6399.31	-1.06333	0.163752	-6.49354	8.38432e-11	5.90188e-10
AAEL009606	2961.58	-0.701228	0.108181	-6.48196	9.05383e-11	6.3696e-10
AAEL007691	13778	1.18547	0.182943	6.48002	9.17095e-11	6.44839e-10
AAEL008894	219.736	1.91884	0.296312	6.47577	9.43312e-11	6.62902e-10
AAEL001520	1717.38	-1.21936	0.188319	-6.475	9.48129e-11	6.65915e-10
AAEL000116	252.622	1.31444	0.203038	6.47387	9.55261e-11	6.7055e-10
AAEL009171	5453.66	-1.4796	0.228622	-6.4718	9.68451e-11	6.79429e-10
AAEL027731	475.588	-1.27221	0.196584	-6.47157	9.69913e-11	6.80075e-10
AAEL014361	169.115	1.66122	0.256752	6.47015	9.79037e-11	6.8609e-10
AAEL000180	1033.05	0.948705	0.146721	6.46605	1.00597e-10	7.04569e-10
AAEL021556	2919.75	-1.60674	0.248602	-6.46311	1.02573e-10	7.1801e-10
AAEL006669	556.047	-0.898095	0.13896	-6.46297	1.0267e-10	7.18292e-10
AAEL019802	8242.1	1.04292	0.161376	6.46265	1.02887e-10	7.19409e-10
AAEL004916	1057.58	0.869713	0.134712	6.45609	1.07441e-10	7.50836e-10
AAEL019549	1925.13	-0.787657	0.122032	-6.4545	1.08577e-10	7.58347e-10
AAEL008280	1298.87	-1.67683	0.259818	-6.45389	1.09018e-10	7.61006e-10
AAEL019650	202.216	-3.14481	0.487286	-6.45372	1.09141e-10	7.61443e-10
AAEL007273	415.323	0.871445	0.135165	6.44729	1.13864e-10	7.93956e-10
AAEL029037	183.098	6.44856	1.00081	6.44335	1.16863e-10	8.14414e-10
AAEL002317	586.281	-1.76337	0.27382	-6.43989	1.19561e-10	8.32751e-10
AAEL027217	461.815	-1.66958	0.259268	-6.43961	1.19779e-10	8.33807e-10
AAEL010042	1967.57	0.958563	0.148867	6.43906	1.20216e-10	8.36392e-10
AAEL022654	75.176	1.81386	0.281947	6.43335	1.2482e-10	8.67801e-10
AAEL005605	10205.1	1.28741	0.200117	6.43329	1.24869e-10	8.67801e-10
AAEL010502	2472.45	-0.895459	0.139235	-6.43128	1.26537e-10	8.78911e-10
AAEL001244	5451.19	-0.982328	0.152773	-6.42999	1.27611e-10	8.85875e-10
AAEL013790	973.584	0.960387	0.149507	6.42368	1.33022e-10	9.22934e-10
AAEL014836	1037.88	1.21376	0.18896	6.42336	1.33302e-10	9.24365e-10
AAEL008275	4541.48	1.16915	0.182093	6.4206	1.35739e-10	9.40744e-10
AAEL009649	1649.18	0.664648	0.103536	6.41951	1.36711e-10	9.46957e-10
AAEL020432	311.749	1.629	0.253821	6.41793	1.38142e-10	9.56342e-10
AAEL006039	1254.44	1.10951	0.173041	6.41182	1.43795e-10	9.94935e-10
AAEL024063	645.187	0.85342	0.133208	6.40666	1.48737e-10	1.02856e-09
AAEL021501	1899.05	-0.653936	0.102078	-6.40624	1.49152e-10	1.03086e-09
AAEL010809	1829.16	1.13909	0.177816	6.40598	1.49402e-10	1.03193e-09
AAEL013402	685.629	1.01913	0.159092	6.40591	1.49471e-10	1.03193e-09
AAEL022010	653.719	1.26195	0.197023	6.40509	1.50278e-10	1.03694e-09
AAEL004064	605.294	1.01847	0.159018	6.40479	1.50581e-10	1.03789e-09
AAEL014198	3644.77	-0.82941	0.129498	-6.40479	1.50576e-10	1.03789e-09
AAEL007904	665.995	0.922959	0.144131	6.40362	1.51735e-10	1.04527e-09
AAEL017101	689.786	0.847991	0.13248	6.40089	1.54471e-10	1.06353e-09
AAEL000647	111045	-0.874604	0.136661	-6.39982	1.55562e-10	1.07046e-09
AAEL011538	578.801	1.15359	0.180283	6.39878	1.56623e-10	1.07717e-09
AAEL002860	4219.98	-1.10252	0.172324	-6.39792	1.57511e-10	1.08269e-09
AAEL010960	1369.12	-0.658059	0.102906	-6.39476	1.60799e-10	1.10468e-09
AAEL023547	3841.09	-1.11036	0.173647	-6.39433	1.61253e-10	1.10719e-09
AAEL005147	936.2	-1.33284	0.208447	-6.39416	1.61432e-10	1.10782e-09
AAEL008686	3838.95	-0.955594	0.149495	-6.39216	1.63557e-10	1.12179e-09
AAEL012675	345.968	0.888187	0.138991	6.39026	1.65603e-10	1.13521e-09
AAEL018205	3983.84	0.770164	0.120536	6.38948	1.6645e-10	1.14039e-09
AAEL005579	3586.69	1.14056	0.178534	6.38847	1.67555e-10	1.14733e-09
AAEL026256	500.033	1.46891	0.229942	6.38815	1.6791e-10	1.14913e-09
AAEL006390	43120.9	1.31556	0.206174	6.38082	1.76143e-10	1.20483e-09
AAEL025630	478.554	2.1214	0.332517	6.37984	1.77277e-10	1.21193e-09
AAEL003698	2743.48	-1.32452	0.207752	-6.37549	1.82375e-10	1.2461e-09
AAEL008862	9170.64	0.816287	0.128083	6.37312	1.85221e-10	1.26485e-09
AAEL026468	329.026	1.52097	0.238668	6.37276	1.85656e-10	1.26714e-09
AAEL008342	471.011	-1.90093	0.298327	-6.37196	1.86626e-10	1.27307e-09
AAEL003405	402.758	2.18312	0.342831	6.36791	1.9162e-10	1.30642e-09
AAEL008175	723.268	1.1357	0.178355	6.36763	1.91974e-10	1.30813e-09
AAEL012924	926.867	1.28916	0.20248	6.36682	1.92989e-10	1.31433e-09
AAEL001020	3525.1	1.40426	0.220698	6.36282	1.98083e-10	1.34829e-09
AAEL006799	794.652	0.903446	0.142001	6.36227	1.98791e-10	1.35165e-09
AAEL000594	1595.46	-0.60258	0.0947106	-6.36234	1.98709e-10	1.35165e-09
AAEL004050	193.917	1.52611	0.239994	6.35896	2.03121e-10	1.38034e-09
AAEL011548	119.434	-2.02715	0.318818	-6.35834	2.03945e-10	1.38519e-09
AAEL003879	302.88	1.46656	0.230889	6.35179	2.12823e-10	1.44394e-09
AAEL025001	210.903	-1.62496	0.255825	-6.35184	2.1275e-10	1.44394e-09
AAEL011019	6439.35	0.424793	0.0668874	6.35086	2.1411e-10	1.45141e-09
AAEL002523	874.442	1.45989	0.229874	6.35083	2.14156e-10	1.45141e-09
AAEL002426	17043.4	1.41579	0.222937	6.35061	2.14461e-10	1.4527e-09
AAEL010563	410.971	1.31432	0.207044	6.34804	2.18078e-10	1.4764e-09
AAEL002818	3491.14	0.538379	0.0848242	6.347	2.19557e-10	1.48561e-09
AAEL022629	822.148	1.30159	0.205111	6.34578	2.21306e-10	1.49664e-09
AAEL013068	15384.4	0.478179	0.0753739	6.34409	2.2374e-10	1.51229e-09
AAEL013907	796.765	0.70338	0.110878	6.34375	2.24236e-10	1.51483e-09
AAEL011099	2223.57	-0.607195	0.095718	-6.34358	2.24486e-10	1.51571e-09
AAEL004663	531.853	0.709284	0.111824	6.34288	2.25514e-10	1.52183e-09
AAEL010895	1780.91	0.671321	0.105869	6.34104	2.28215e-10	1.53923e-09
AAEL005217	607.558	1.28869	0.203262	6.34005	2.29685e-10	1.54831e-09
AAEL024346	2826.8	-0.994894	0.156985	-6.3375	2.33521e-10	1.57333e-09
AAEL005414	1100.67	0.873299	0.137818	6.33662	2.34863e-10	1.58152e-09
AAEL020915	887.238	-1.10657	0.174636	-6.33645	2.35126e-10	1.58245e-09
AAEL006563	943.347	8.08776	1.27657	6.33552	2.36538e-10	1.5911e-09
AAEL025046	250.238	-1.35757	0.214291	-6.33515	2.37106e-10	1.59406e-09
AAEL006026	602.021	1.09492	0.17287	6.33381	2.3918e-10	1.60714e-09
AAEL025259	254.607	-1.36953	0.216249	-6.33311	2.40264e-10	1.61357e-09
AAEL003151	1307.17	-0.691347	0.109165	-6.33302	2.40408e-10	1.61367e-09
AAEL019568	78014.6	-0.840996	0.132801	-6.33276	2.40807e-10	1.61549e-09
AAEL007910	459.672	-1.80764	0.285489	-6.33174	2.42416e-10	1.62541e-09
AAEL022184	34.5015	-4.42712	0.699433	-6.32959	2.45814e-10	1.64732e-09
AAEL002563	861.122	0.725858	0.114682	6.32931	2.46265e-10	1.64946e-09
AAEL011703	3188.22	0.724339	0.114449	6.32891	2.46905e-10	1.65287e-09
AAEL011850	925.195	1.61889	0.255827	6.32806	2.48271e-10	1.66113e-09
AAEL010433	579.867	-1.14384	0.180763	-6.32787	2.48571e-10	1.66225e-09
AAEL018280	2699.4	-0.831492	0.131415	-6.32724	2.49586e-10	1.66815e-09
AAEL012100	1660.66	1.43505	0.226869	6.32546	2.52478e-10	1.68658e-09
AAEL009389	5369.32	0.774801	0.12258	6.32078	2.60244e-10	1.73754e-09
[truncated: 17,880 more rows]

## Sheet: Mg8v0
geneID	baseMean	log2FoldChange	lfcSE	stat	pvalue	padj
[truncated: 19,763 more rows]

[truncated: 16 more sheets: Mg12v0, Mg18v0, Mg24v0, Mg36v0, Mg48v0, Mg72v0, Mg4v1, Mg6v4, Mg8v6, Mg12v8, Mg18v12, Mg24v18, Mg36v24, Mg48v36, Mg72v48, 0.05>FDR]
