# Supplementary material for: An 11-point time course midgut transcriptome across 72 h after blood feeding provides detailed temporal resolution of transcript expression in the arbovirus vector, Aedes aegypti
Source: bioRxiv preprint, doi:10.1101/2023.03.03.531062, version 2 (2023-07-19)
Supplement: Supplemental Table S2 [file 531062_file05.xlsx]

## Sheet: 4hp_BP
ID	Name	Bgd count	Result count	Result gene list	Pct of bgd	Fold enrichment	Odds ratio	P-value	Benjamini	Bonferroni
GO:0016070	RNA metabolic process	517	149	AAEL000076,AAEL000118,AAEL000199,AAEL000215,AAEL000388,AAEL000422,AAEL000659,AAEL000708,AAEL000938,AAEL000978,AAEL001036,AAEL001037,AAEL001044,AAEL001080,AAEL001169,AAEL001171,AAEL001218,AAEL001339,AAEL001371,AAEL001506,AAEL001716,AAEL002056,AAEL002232,AAEL002249,AAEL002322,AAEL002719,AAEL002843,AAEL003287,AAEL003514,AAEL003528,AAEL003654,AAEL003664,AAEL003879,AAEL004327,AAEL004345,AAEL004376,AAE…	28.8	4.37	6.94	1.16791e-58	1.10835e-55	1.10835e-55
GO:0090304	nucleic acid metabolic process	691	168	AAEL000076,AAEL000118,AAEL000199,AAEL000215,AAEL000388,AAEL000404,AAEL000422,AAEL000659,AAEL000708,AAEL000938,AAEL000978,AAEL001036,AAEL001037,AAEL001044,AAEL001080,AAEL001169,AAEL001171,AAEL001218,AAEL001339,AAEL001371,AAEL001506,AAEL001716,AAEL002056,AAEL002232,AAEL002249,AAEL002322,AAEL002407,AAEL002719,AAEL002843,AAEL003287,AAEL003514,AAEL003528,AAEL003654,AAEL003664,AAEL003879,AAEL003935,AAE…	24.3	3.69	5.61	7.89117e-55	3.74436e-52	7.48872e-52
GO:0006396	RNA processing	233	96	AAEL000076,AAEL000118,AAEL000215,AAEL000422,AAEL000659,AAEL000708,AAEL000938,AAEL000978,AAEL001036,AAEL001037,AAEL001080,AAEL001169,AAEL001171,AAEL001371,AAEL001506,AAEL001716,AAEL002056,AAEL002232,AAEL002249,AAEL002322,AAEL002719,AAEL003287,AAEL003514,AAEL003654,AAEL003664,AAEL003879,AAEL004376,AAEL004422,AAEL004455,AAEL004482,AAEL004526,AAEL004558,AAEL004896,AAEL005025,AAEL005041,AAEL005046,AAE…	41.2	6.25	11.27	5.81463e-53	1.83936e-50	5.51809e-50
GO:0046483	heterocycle metabolic process	882	182	AAEL000076,AAEL000118,AAEL000199,AAEL000215,AAEL000388,AAEL000404,AAEL000422,AAEL000428,AAEL000659,AAEL000708,AAEL000938,AAEL000978,AAEL001036,AAEL001037,AAEL001044,AAEL001080,AAEL001102,AAEL001169,AAEL001171,AAEL001218,AAEL001339,AAEL001371,AAEL001506,AAEL001716,AAEL002056,AAEL002232,AAEL002249,AAEL002322,AAEL002407,AAEL002510,AAEL002719,AAEL002843,AAEL003287,AAEL003514,AAEL003528,AAEL003654,AAE…	20.6	3.13	4.57	2.71764e-48	6.44759e-46	2.57904e-45
GO:0006139	nucleobase-containing compound metabolic process	841	177	AAEL000076,AAEL000118,AAEL000199,AAEL000215,AAEL000388,AAEL000404,AAEL000422,AAEL000659,AAEL000708,AAEL000938,AAEL000978,AAEL001036,AAEL001037,AAEL001044,AAEL001080,AAEL001102,AAEL001169,AAEL001171,AAEL001218,AAEL001339,AAEL001371,AAEL001506,AAEL001716,AAEL002056,AAEL002232,AAEL002249,AAEL002322,AAEL002407,AAEL002719,AAEL002843,AAEL003287,AAEL003514,AAEL003528,AAEL003654,AAEL003664,AAEL003879,AAE…	21	3.19	4.66	3.8411e-48	7.2904e-46	3.6452e-45
GO:0006725	cellular aromatic compound metabolic process	884	181	AAEL000076,AAEL000118,AAEL000199,AAEL000215,AAEL000388,AAEL000404,AAEL000422,AAEL000428,AAEL000659,AAEL000708,AAEL000938,AAEL000978,AAEL001036,AAEL001037,AAEL001044,AAEL001080,AAEL001102,AAEL001169,AAEL001171,AAEL001218,AAEL001339,AAEL001371,AAEL001506,AAEL001716,AAEL002056,AAEL002232,AAEL002249,AAEL002322,AAEL002407,AAEL002510,AAEL002719,AAEL002843,AAEL003287,AAEL003514,AAEL003528,AAEL003654,AAE…	20.5	3.1	4.51	1.75787e-47	2.78037e-45	1.66822e-44
GO:1901360	organic cyclic compound metabolic process	899	182	AAEL000076,AAEL000118,AAEL000199,AAEL000215,AAEL000388,AAEL000404,AAEL000422,AAEL000428,AAEL000659,AAEL000708,AAEL000938,AAEL000978,AAEL001036,AAEL001037,AAEL001044,AAEL001080,AAEL001102,AAEL001169,AAEL001171,AAEL001218,AAEL001339,AAEL001371,AAEL001506,AAEL001716,AAEL002056,AAEL002232,AAEL002249,AAEL002322,AAEL002407,AAEL002510,AAEL002719,AAEL002843,AAEL003287,AAEL003514,AAEL003528,AAEL003654,AAE…	20.2	3.07	4.45	5.19261e-47	7.0397e-45	4.92779e-44
GO:0034660	ncRNA metabolic process	151	73	AAEL000076,AAEL000199,AAEL000215,AAEL000388,AAEL000422,AAEL000708,AAEL000938,AAEL000978,AAEL001036,AAEL001037,AAEL001044,AAEL001169,AAEL001171,AAEL001218,AAEL001506,AAEL002056,AAEL002232,AAEL002249,AAEL002322,AAEL002719,AAEL003287,AAEL003654,AAEL003879,AAEL004327,AAEL004345,AAEL004422,AAEL004455,AAEL004482,AAEL004526,AAEL004558,AAEL004896,AAEL005041,AAEL005628,AAEL006415,AAEL006469,AAEL006637,AAE…	48.3	7.33	14.61	2.91896e-46	3.46261e-44	2.77009e-43
GO:0010467	gene expression	698	152	AAEL000076,AAEL000118,AAEL000199,AAEL000215,AAEL000388,AAEL000422,AAEL000659,AAEL000708,AAEL000938,AAEL000978,AAEL001036,AAEL001037,AAEL001044,AAEL001080,AAEL001169,AAEL001171,AAEL001218,AAEL001339,AAEL001371,AAEL001506,AAEL001716,AAEL002056,AAEL002232,AAEL002249,AAEL002322,AAEL002719,AAEL003142,AAEL003287,AAEL003514,AAEL003528,AAEL003654,AAEL003661,AAEL003664,AAEL003822,AAEL003879,AAEL003908,AAE…	21.8	3.3	4.71	8.46737e-43	8.92837e-41	8.03553e-40
GO:0034470	ncRNA processing	103	58	AAEL000076,AAEL000215,AAEL000422,AAEL000708,AAEL000938,AAEL000978,AAEL001036,AAEL001037,AAEL001169,AAEL001171,AAEL001506,AAEL002056,AAEL002232,AAEL002249,AAEL002322,AAEL002719,AAEL003287,AAEL003654,AAEL003879,AAEL004422,AAEL004455,AAEL004482,AAEL004526,AAEL004558,AAEL004896,AAEL005041,AAEL005628,AAEL006469,AAEL006637,AAEL006972,AAEL007158,AAEL007788,AAEL008124,AAEL008706,AAEL009308,AAEL009542,AAE…	56.3	8.54	19.73	8.17003e-42	7.08578e-40	7.75336e-39
GO:0034641	cellular nitrogen compound metabolic process	1114	197	AAEL000076,AAEL000118,AAEL000199,AAEL000215,AAEL000388,AAEL000404,AAEL000422,AAEL000428,AAEL000659,AAEL000708,AAEL000938,AAEL000978,AAEL001036,AAEL001037,AAEL001044,AAEL001080,AAEL001102,AAEL001169,AAEL001171,AAEL001218,AAEL001339,AAEL001371,AAEL001378,AAEL001506,AAEL001716,AAEL002056,AAEL002232,AAEL002249,AAEL002322,AAEL002407,AAEL002719,AAEL002843,AAEL003142,AAEL003287,AAEL003514,AAEL003528,AAE…	17.7	2.68	3.79	8.21323e-42	7.08578e-40	7.79436e-39
GO:0042254	ribosome biogenesis	65	43	AAEL000076,AAEL000422,AAEL000708,AAEL000978,AAEL001037,AAEL001080,AAEL001169,AAEL001506,AAEL002249,AAEL002322,AAEL002843,AAEL003352,AAEL003661,AAEL004422,AAEL004455,AAEL004482,AAEL004526,AAEL005041,AAEL005163,AAEL005628,AAEL006469,AAEL006637,AAEL006887,AAEL006972,AAEL007158,AAEL008706,AAEL009308,AAEL009579,AAEL010248,AAEL010333,AAEL010949,AAEL010970,AAEL011282,AAEL011696,AAEL012185,AAEL012235,AAE…	66.2	10.03	29.34	1.59469e-35	1.26114e-33	1.51336e-32
GO:0022613	ribonucleoprotein complex biogenesis	93	49	AAEL000076,AAEL000422,AAEL000708,AAEL000978,AAEL001037,AAEL001080,AAEL001169,AAEL001506,AAEL002249,AAEL002322,AAEL002843,AAEL003352,AAEL003661,AAEL004422,AAEL004455,AAEL004482,AAEL004526,AAEL005041,AAEL005163,AAEL005628,AAEL006469,AAEL006637,AAEL006887,AAEL006972,AAEL007078,AAEL007158,AAEL007203,AAEL007718,AAEL008706,AAEL009308,AAEL009579,AAEL010248,AAEL010333,AAEL010376,AAEL010949,AAEL010970,AAE…	52.7	7.99	16.83	1.371e-33	1.00083e-31	1.30108e-30
GO:0006364	rRNA processing	39	30	AAEL000076,AAEL000422,AAEL000708,AAEL000978,AAEL001037,AAEL001169,AAEL001506,AAEL002249,AAEL002322,AAEL004422,AAEL004455,AAEL004482,AAEL004526,AAEL005041,AAEL005628,AAEL006469,AAEL006637,AAEL006972,AAEL007158,AAEL008706,AAEL009308,AAEL009579,AAEL010248,AAEL010333,AAEL010949,AAEL010970,AAEL011282,AAEL012260,AAEL017113,AAEL025704,	76.9	11.66	49.17	2.58886e-28	1.75488e-26	2.45683e-25
GO:0044237	cellular metabolic process	2282	275	AAEL000076,AAEL000109,AAEL000118,AAEL000199,AAEL000215,AAEL000276,AAEL000284,AAEL000388,AAEL000404,AAEL000422,AAEL000428,AAEL000589,AAEL000659,AAEL000708,AAEL000730,AAEL000938,AAEL000978,AAEL001036,AAEL001037,AAEL001044,AAEL001080,AAEL001102,AAEL001151,AAEL001169,AAEL001171,AAEL001218,AAEL001339,AAEL001371,AAEL001378,AAEL001506,AAEL001716,AAEL002056,AAEL002232,AAEL002249,AAEL002322,AAEL002329,AAE…	12.1	1.83	2.51	3.52488e-28	2.23007e-26	3.34511e-25
GO:0016072	rRNA metabolic process	40	30	AAEL000076,AAEL000422,AAEL000708,AAEL000978,AAEL001037,AAEL001169,AAEL001506,AAEL002249,AAEL002322,AAEL004422,AAEL004455,AAEL004482,AAEL004526,AAEL005041,AAEL005628,AAEL006469,AAEL006637,AAEL006972,AAEL007158,AAEL008706,AAEL009308,AAEL009579,AAEL010248,AAEL010333,AAEL010949,AAEL010970,AAEL011282,AAEL012260,AAEL017113,AAEL025704,	75	11.37	44.25	9.71966e-28	5.76497e-26	9.22396e-25
GO:0043170	macromolecule metabolic process	2352	270	AAEL000038,AAEL000076,AAEL000118,AAEL000199,AAEL000215,AAEL000276,AAEL000284,AAEL000388,AAEL000404,AAEL000422,AAEL000589,AAEL000659,AAEL000708,AAEL000730,AAEL000938,AAEL000978,AAEL001036,AAEL001037,AAEL001044,AAEL001080,AAEL001151,AAEL001169,AAEL001171,AAEL001218,AAEL001232,AAEL001339,AAEL001371,AAEL001506,AAEL001716,AAEL001855,AAEL002056,AAEL002068,AAEL002232,AAEL002249,AAEL002322,AAEL002329,AAE…	11.5	1.74	2.33	4.50314e-24	2.51381e-22	4.27348e-21
GO:0006807	nitrogen compound metabolic process	2601	288	AAEL000038,AAEL000076,AAEL000109,AAEL000118,AAEL000199,AAEL000215,AAEL000276,AAEL000284,AAEL000388,AAEL000404,AAEL000422,AAEL000428,AAEL000589,AAEL000659,AAEL000708,AAEL000730,AAEL000938,AAEL000978,AAEL001036,AAEL001037,AAEL001044,AAEL001080,AAEL001102,AAEL001151,AAEL001169,AAEL001171,AAEL001218,AAEL001232,AAEL001339,AAEL001371,AAEL001378,AAEL001506,AAEL001716,AAEL001855,AAEL002056,AAEL002068,AAE…	11.1	1.68	2.26	1.87374e-23	9.87876e-22	1.77818e-20
GO:0006399	tRNA metabolic process	100	37	AAEL000199,AAEL000215,AAEL000388,AAEL000938,AAEL001036,AAEL001044,AAEL001171,AAEL001218,AAEL002056,AAEL002232,AAEL002719,AAEL003654,AAEL003879,AAEL004327,AAEL004345,AAEL004558,AAEL004896,AAEL006415,AAEL006469,AAEL008124,AAEL008509,AAEL009542,AAEL009603,AAEL009908,AAEL010336,AAEL010349,AAEL010993,AAEL011395,AAEL011435,AAEL011538,AAEL012140,AAEL013488,AAEL013968,AAEL014489,AAEL014702,AAEL014709,AAE…	37	5.61	8.71	5.53226e-19	2.76322e-17	5.25012e-16
GO:0044238	primary metabolic process	2834	290	AAEL000038,AAEL000076,AAEL000109,AAEL000118,AAEL000199,AAEL000215,AAEL000276,AAEL000284,AAEL000388,AAEL000404,AAEL000422,AAEL000428,AAEL000589,AAEL000659,AAEL000708,AAEL000730,AAEL000938,AAEL000978,AAEL001036,AAEL001037,AAEL001044,AAEL001080,AAEL001102,AAEL001151,AAEL001169,AAEL001171,AAEL001218,AAEL001232,AAEL001339,AAEL001371,AAEL001506,AAEL001716,AAEL001855,AAEL002056,AAEL002068,AAEL002232,AAE…	10.2	1.55	2.02	3.49223e-18	1.65707e-16	3.31413e-15
GO:0009987	cellular process	4254	391	AAEL000076,AAEL000088,AAEL000109,AAEL000118,AAEL000199,AAEL000215,AAEL000276,AAEL000284,AAEL000388,AAEL000404,AAEL000422,AAEL000428,AAEL000574,AAEL000589,AAEL000659,AAEL000708,AAEL000730,AAEL000938,AAEL000978,AAEL001029,AAEL001036,AAEL001037,AAEL001044,AAEL001080,AAEL001102,AAEL001113,AAEL001151,AAEL001169,AAEL001171,AAEL001218,AAEL001339,AAEL001371,AAEL001378,AAEL001497,AAEL001506,AAEL001656,AAE…	9.2	1.39	1.93	8.26156e-18	3.73344e-16	7.84022e-15
GO:0009451	RNA modification	71	30	AAEL000076,AAEL000938,AAEL001036,AAEL001037,AAEL001171,AAEL002056,AAEL002719,AAEL002843,AAEL003514,AAEL003654,AAEL004376,AAEL004422,AAEL004558,AAEL004663,AAEL004702,AAEL004896,AAEL006469,AAEL008124,AAEL009023,AAEL009603,AAEL010349,AAEL010362,AAEL010949,AAEL010993,AAEL011435,AAEL012140,AAEL013488,AAEL013968,AAEL013974,AAEL017113,	42.3	6.41	10.76	1.54089e-17	6.64686e-16	1.46231e-14
GO:0071704	organic substance metabolic process	3037	297	AAEL000038,AAEL000076,AAEL000109,AAEL000118,AAEL000199,AAEL000215,AAEL000276,AAEL000284,AAEL000388,AAEL000404,AAEL000422,AAEL000428,AAEL000589,AAEL000659,AAEL000708,AAEL000730,AAEL000938,AAEL000978,AAEL001036,AAEL001037,AAEL001044,AAEL001080,AAEL001102,AAEL001151,AAEL001169,AAEL001171,AAEL001218,AAEL001232,AAEL001339,AAEL001371,AAEL001378,AAEL001506,AAEL001716,AAEL001855,AAEL002056,AAEL002068,AAE…	9.8	1.48	1.9	8.84408e-16	3.64914e-14	8.39303e-13
GO:0008033	tRNA processing	54	23	AAEL000215,AAEL000938,AAEL001036,AAEL001171,AAEL002056,AAEL002232,AAEL002719,AAEL003654,AAEL003879,AAEL004558,AAEL004896,AAEL006469,AAEL008124,AAEL009542,AAEL009603,AAEL010336,AAEL010349,AAEL010993,AAEL011435,AAEL011538,AAEL012140,AAEL013488,AAEL013968,	42.6	6.46	10.81	7.69191e-14	3.04151e-12	7.29962e-11
GO:0032259	methylation	95	29	AAEL000076,AAEL000284,AAEL000938,AAEL001037,AAEL002888,AAEL003447,AAEL003522,AAEL003654,AAEL003922,AAEL004282,AAEL004422,AAEL004558,AAEL004702,AAEL006637,AAEL007578,AAEL008124,AAEL009023,AAEL009603,AAEL010349,AAEL010829,AAEL010949,AAEL011282,AAEL011877,AAEL012932,AAEL013968,AAEL013974,AAEL014536,AAEL021474,AAEL021860,	30.5	4.63	6.44	1.11348e-12	4.22678e-11	1.0567e-09
GO:0044260	cellular macromolecule metabolic process	1408	158	AAEL000076,AAEL000199,AAEL000276,AAEL000284,AAEL000388,AAEL000404,AAEL000589,AAEL000659,AAEL000730,AAEL000938,AAEL001037,AAEL001044,AAEL001151,AAEL001218,AAEL001339,AAEL002056,AAEL002329,AAEL002407,AAEL002805,AAEL002808,AAEL003142,AAEL003412,AAEL003477,AAEL003517,AAEL003522,AAEL003528,AAEL003654,AAEL003661,AAEL003769,AAEL003822,AAEL003935,AAEL004040,AAEL004110,AAEL004282,AAEL004288,AAEL004327,AAE…	11.2	1.7	2.01	2.45304e-12	8.95359e-11	2.32793e-09
GO:0016071	mRNA metabolic process	113	31	AAEL000118,AAEL001371,AAEL001716,AAEL003287,AAEL004702,AAEL005025,AAEL005046,AAEL006713,AAEL006867,AAEL007203,AAEL009061,AAEL009839,AAEL009959,AAEL010003,AAEL010387,AAEL010468,AAEL010598,AAEL011251,AAEL011687,AAEL011745,AAEL011817,AAEL013869,AAEL013888,AAEL019670,AAEL020583,AAEL020761,AAEL021977,AAEL022912,AAEL022970,AAEL026536,AAEL026651,	27.4	4.16	5.55	4.33031e-12	1.52202e-10	4.10946e-09
GO:0006400	tRNA modification	36	17	AAEL000938,AAEL001036,AAEL001171,AAEL002056,AAEL002719,AAEL003654,AAEL004558,AAEL004896,AAEL006469,AAEL008124,AAEL009603,AAEL010349,AAEL010993,AAEL011435,AAEL012140,AAEL013488,AAEL013968,	47.2	7.16	12.95	1.85484e-11	6.2866e-10	1.76025e-08
GO:0043412	macromolecule modification	742	97	AAEL000076,AAEL000276,AAEL000284,AAEL000589,AAEL000730,AAEL000938,AAEL001036,AAEL001037,AAEL001151,AAEL001171,AAEL001339,AAEL002056,AAEL002329,AAEL002719,AAEL002805,AAEL002808,AAEL002843,AAEL003412,AAEL003477,AAEL003514,AAEL003517,AAEL003522,AAEL003528,AAEL003654,AAEL003769,AAEL004040,AAEL004110,AAEL004282,AAEL004288,AAEL004376,AAEL004422,AAEL004558,AAEL004663,AAEL004702,AAEL004866,AAEL004896,AAE…	13.1	1.98	2.3	2.6219e-11	8.57994e-10	2.48818e-08
GO:0044085	cellular component biogenesis	324	55	AAEL000076,AAEL000422,AAEL000708,AAEL000978,AAEL001037,AAEL001080,AAEL001169,AAEL001506,AAEL002249,AAEL002322,AAEL002843,AAEL003352,AAEL003661,AAEL004422,AAEL004455,AAEL004482,AAEL004526,AAEL005041,AAEL005163,AAEL005368,AAEL005567,AAEL005628,AAEL006374,AAEL006469,AAEL006474,AAEL006637,AAEL006887,AAEL006972,AAEL007078,AAEL007158,AAEL007203,AAEL007718,AAEL008706,AAEL009308,AAEL009579,AAEL010248,AAE…	17	2.57	3.05	5.76474e-11	1.82358e-09	5.47074e-08
GO:0042273	ribosomal large subunit biogenesis	12	10	AAEL001169,AAEL003661,AAEL004455,AAEL005041,AAEL006887,AAEL011696,AAEL012235,AAEL019896,AAEL020307,AAEL027026,	83.3	12.63	71.77	8.60105e-11	2.63303e-09	8.1624e-08
GO:0043414	macromolecule methylation	72	22	AAEL000076,AAEL000284,AAEL000938,AAEL001037,AAEL003522,AAEL003654,AAEL004282,AAEL004422,AAEL004558,AAEL004702,AAEL007578,AAEL008124,AAEL009023,AAEL009603,AAEL010349,AAEL010829,AAEL010949,AAEL011877,AAEL013968,AAEL013974,AAEL014536,AAEL021474,	30.6	4.63	6.39	5.97127e-10	1.77086e-08	5.66674e-07
GO:0006913	nucleocytoplasmic transport	34	15	AAEL001029,AAEL001716,AAEL002012,AAEL003908,AAEL004053,AAEL006075,AAEL007066,AAEL008557,AAEL009287,AAEL009392,AAEL010698,AAEL010900,AAEL012489,AAEL020307,AAEL026104,	44.1	6.69	11.39	9.64011e-10	2.77226e-08	9.14846e-07
GO:0006397	mRNA processing	88	24	AAEL000118,AAEL001371,AAEL001716,AAEL003287,AAEL005025,AAEL005046,AAEL006713,AAEL007203,AAEL009061,AAEL009839,AAEL009959,AAEL010003,AAEL010387,AAEL011251,AAEL011687,AAEL011745,AAEL013869,AAEL013888,AAEL019670,AAEL020583,AAEL020761,AAEL022912,AAEL022970,AAEL026651,	27.3	4.13	5.46	1.3238e-09	3.69495e-08	1.25628e-06
GO:0051169	nuclear transport	35	15	AAEL001029,AAEL001716,AAEL002012,AAEL003908,AAEL004053,AAEL006075,AAEL007066,AAEL008557,AAEL009287,AAEL009392,AAEL010698,AAEL010900,AAEL012489,AAEL020307,AAEL026104,	42.9	6.5	10.82	1.58505e-09	4.29776e-08	1.50422e-06
GO:0008152	metabolic process	3712	319	AAEL000038,AAEL000076,AAEL000109,AAEL000118,AAEL000199,AAEL000215,AAEL000276,AAEL000284,AAEL000388,AAEL000404,AAEL000422,AAEL000428,AAEL000589,AAEL000659,AAEL000706,AAEL000708,AAEL000730,AAEL000834,AAEL000938,AAEL000978,AAEL001036,AAEL001037,AAEL001044,AAEL001080,AAEL001091,AAEL001102,AAEL001151,AAEL001169,AAEL001171,AAEL001218,AAEL001232,AAEL001339,AAEL001371,AAEL001378,AAEL001506,AAEL001716,AAE…	8.6	1.3	1.59	2.30366e-09	6.0727e-08	2.18617e-06
GO:0001510	RNA methylation	32	14	AAEL000076,AAEL000938,AAEL001037,AAEL003654,AAEL004422,AAEL004558,AAEL004702,AAEL008124,AAEL009023,AAEL009603,AAEL010349,AAEL010949,AAEL013968,AAEL013974,	43.8	6.63	11.21	4.03915e-09	1.03599e-07	3.83315e-06
GO:0008150	biological process	5926	466	AAEL000038,AAEL000076,AAEL000088,AAEL000109,AAEL000118,AAEL000199,AAEL000215,AAEL000276,AAEL000284,AAEL000388,AAEL000404,AAEL000422,AAEL000428,AAEL000574,AAEL000589,AAEL000659,AAEL000706,AAEL000708,AAEL000730,AAEL000938,AAEL000978,AAEL001029,AAEL001036,AAEL001037,AAEL001044,AAEL001080,AAEL001102,AAEL001113,AAEL001129,AAEL001151,AAEL001169,AAEL001171,AAEL001218,AAEL001232,AAEL001277,AAEL001339,AAE…	7.9	1.19	1.57	4.15057e-09	1.03655e-07	3.93889e-06
GO:0071840	cellular component organization or biogenesis	607	76	AAEL000076,AAEL000088,AAEL000404,AAEL000422,AAEL000708,AAEL000730,AAEL000978,AAEL001037,AAEL001080,AAEL001169,AAEL001506,AAEL002249,AAEL002322,AAEL002843,AAEL003352,AAEL003661,AAEL004142,AAEL004332,AAEL004422,AAEL004455,AAEL004482,AAEL004526,AAEL004686,AAEL004756,AAEL005041,AAEL005163,AAEL005245,AAEL005368,AAEL005567,AAEL005628,AAEL006367,AAEL006374,AAEL006469,AAEL006474,AAEL006637,AAEL006887,AAE…	12.5	1.9	2.15	3.10529e-08	7.55619e-07	2.94692e-05
GO:0042255	ribosome assembly	9	7	AAEL003661,AAEL004455,AAEL005163,AAEL006887,AAEL012235,AAEL019896,AAEL027026,	77.8	11.79	50.03	1.69288e-07	4.01636e-06	0.000160655
GO:0030488	tRNA methylation	10	7	AAEL000938,AAEL003654,AAEL004558,AAEL008124,AAEL009603,AAEL010349,AAEL013968,	70	10.61	33.35	5.32073e-07	1.23155e-05	0.000504937
GO:0000027	ribosomal large subunit assembly	5	5	AAEL004455,AAEL006887,AAEL012235,AAEL019896,AAEL027026,	100	15.16	inf	1.23303e-06	2.72109e-05	0.00117015
GO:0022618	ribonucleoprotein complex assembly	35	12	AAEL002843,AAEL004455,AAEL006887,AAEL007078,AAEL007203,AAEL007718,AAEL010376,AAEL011687,AAEL012235,AAEL019896,AAEL022970,AAEL027026,	34.3	5.2	7.49	1.26162e-06	2.72109e-05	0.00119728
GO:0071826	ribonucleoprotein complex subunit organization	35	12	AAEL002843,AAEL004455,AAEL006887,AAEL007078,AAEL007203,AAEL007718,AAEL010376,AAEL011687,AAEL012235,AAEL019896,AAEL022970,AAEL027026,	34.3	5.2	7.49	1.26162e-06	2.72109e-05	0.00119728
GO:0046907	intracellular transport	208	33	AAEL001029,AAEL001497,AAEL001709,AAEL001716,AAEL002012,AAEL003283,AAEL003573,AAEL003908,AAEL004035,AAEL004053,AAEL004332,AAEL004756,AAEL005390,AAEL006075,AAEL007066,AAEL007484,AAEL008557,AAEL009039,AAEL009080,AAEL009287,AAEL009392,AAEL010403,AAEL010698,AAEL010900,AAEL011663,AAEL012489,AAEL013470,AAEL013541,AAEL020265,AAEL020307,AAEL020592,AAEL026104,AAEL027322,	15.9	2.41	2.75	2.07252e-06	4.37071e-05	0.00196682
GO:0043038	amino acid activation	44	13	AAEL000199,AAEL000388,AAEL001044,AAEL001218,AAEL004327,AAEL004345,AAEL006415,AAEL008509,AAEL009908,AAEL011395,AAEL014702,AAEL014709,AAEL023850,	29.5	4.48	6.03	3.08953e-06	6.23822e-05	0.00293196
GO:0043039	tRNA aminoacylation	44	13	AAEL000199,AAEL000388,AAEL001044,AAEL001218,AAEL004327,AAEL004345,AAEL006415,AAEL008509,AAEL009908,AAEL011395,AAEL014702,AAEL014709,AAEL023850,	29.5	4.48	6.03	3.08953e-06	6.23822e-05	0.00293196
GO:0051649	establishment of localization in cell	220	33	AAEL001029,AAEL001497,AAEL001709,AAEL001716,AAEL002012,AAEL003283,AAEL003573,AAEL003908,AAEL004035,AAEL004053,AAEL004332,AAEL004756,AAEL005390,AAEL006075,AAEL007066,AAEL007484,AAEL008557,AAEL009039,AAEL009080,AAEL009287,AAEL009392,AAEL010403,AAEL010698,AAEL010900,AAEL011663,AAEL012489,AAEL013470,AAEL013541,AAEL020265,AAEL020307,AAEL020592,AAEL026104,AAEL027322,	15	2.27	2.57	7.2012e-06	0.000142374	0.00683394
GO:0006418	tRNA aminoacylation for protein translation	42	12	AAEL000199,AAEL000388,AAEL001044,AAEL001218,AAEL004327,AAEL004345,AAEL006415,AAEL008509,AAEL011395,AAEL014702,AAEL014709,AAEL023850,	28.6	4.33	5.74	1.08881e-05	0.000210874	0.0103328
GO:0051641	cellular localization	246	35	AAEL001029,AAEL001497,AAEL001709,AAEL001716,AAEL002012,AAEL003283,AAEL003573,AAEL003908,AAEL004035,AAEL004053,AAEL004332,AAEL004756,AAEL005390,AAEL006075,AAEL007066,AAEL007484,AAEL008557,AAEL009039,AAEL009080,AAEL009287,AAEL009392,AAEL009926,AAEL010403,AAEL010698,AAEL010900,AAEL011663,AAEL012489,AAEL013470,AAEL013541,AAEL020265,AAEL020307,AAEL020592,AAEL023242,AAEL026104,AAEL027322,	14.2	2.16	2.42	1.25918e-05	0.000238992	0.0119496
GO:0051168	nuclear export	15	7	AAEL001716,AAEL002012,AAEL003908,AAEL006075,AAEL007066,AAEL009392,AAEL020307,	46.7	7.07	12.5	2.12827e-05	0.00038841	0.0201973
GO:0140694	non-membrane-bounded organelle assembly	15	7	AAEL003661,AAEL004455,AAEL005163,AAEL006887,AAEL012235,AAEL019896,AAEL027026,	46.7	7.07	12.5	2.12827e-05	0.00038841	0.0201973
GO:0034645	cellular macromolecule biosynthetic process	603	66	AAEL000199,AAEL000388,AAEL001044,AAEL001151,AAEL001218,AAEL001339,AAEL002329,AAEL002805,AAEL003142,AAEL003528,AAEL003661,AAEL003822,AAEL003935,AAEL004327,AAEL004345,AAEL004974,AAEL005092,AAEL005368,AAEL005468,AAEL006172,AAEL006415,AAEL007056,AAEL007078,AAEL007496,AAEL007501,AAEL007568,AAEL007718,AAEL008181,AAEL008509,AAEL008584,AAEL008716,AAEL008794,AAEL008960,AAEL009908,AAEL010468,AAEL010607,AAE…	10.9	1.66	1.81	2.73529e-05	0.000489772	0.0259579
GO:0009059	macromolecule biosynthetic process	604	66	AAEL000199,AAEL000388,AAEL001044,AAEL001151,AAEL001218,AAEL001339,AAEL002329,AAEL002805,AAEL003142,AAEL003528,AAEL003661,AAEL003822,AAEL003935,AAEL004327,AAEL004345,AAEL004974,AAEL005092,AAEL005368,AAEL005468,AAEL006172,AAEL006415,AAEL007056,AAEL007078,AAEL007496,AAEL007501,AAEL007568,AAEL007718,AAEL008181,AAEL008509,AAEL008584,AAEL008716,AAEL008794,AAEL008960,AAEL009908,AAEL010468,AAEL010607,AAE…	10.9	1.66	1.81	2.88218e-05	0.000506516	0.0273519
GO:0050658	RNA transport	16	7	AAEL001716,AAEL002012,AAEL003908,AAEL004053,AAEL006075,AAEL007066,AAEL009839,	43.8	6.63	11.11	3.56876e-05	0.000594168	0.0338675
GO:0050657	nucleic acid transport	16	7	AAEL001716,AAEL002012,AAEL003908,AAEL004053,AAEL006075,AAEL007066,AAEL009839,	43.8	6.63	11.11	3.56876e-05	0.000594168	0.0338675
GO:0051236	establishment of RNA localization	16	7	AAEL001716,AAEL002012,AAEL003908,AAEL004053,AAEL006075,AAEL007066,AAEL009839,	43.8	6.63	11.11	3.56876e-05	0.000594168	0.0338675
GO:0071705	nitrogen compound transport	209	30	AAEL000088,AAEL001709,AAEL001716,AAEL002012,AAEL003283,AAEL003573,AAEL003908,AAEL004035,AAEL004053,AAEL004756,AAEL005390,AAEL005411,AAEL006075,AAEL006124,AAEL007066,AAEL007484,AAEL009039,AAEL009080,AAEL009287,AAEL009392,AAEL009839,AAEL009926,AAEL010698,AAEL010900,AAEL011663,AAEL013541,AAEL014248,AAEL020265,AAEL020307,AAEL027322,	14.4	2.18	2.43	4.38731e-05	0.000717855	0.0416356
GO:0006520	cellular amino acid metabolic process	123	21	AAEL000109,AAEL000199,AAEL000388,AAEL000428,AAEL001044,AAEL001218,AAEL002510,AAEL003462,AAEL004059,AAEL004327,AAEL004345,AAEL006415,AAEL008509,AAEL009908,AAEL011395,AAEL014702,AAEL014709,AAEL015631,AAEL023850,AAEL025146,AAEL025680,	17.1	2.59	2.97	4.91577e-05	0.000790689	0.0466507
GO:0044267	cellular protein metabolic process	974	95	AAEL000199,AAEL000276,AAEL000284,AAEL000388,AAEL000589,AAEL000730,AAEL001044,AAEL001151,AAEL001218,AAEL001339,AAEL002056,AAEL002329,AAEL002805,AAEL002808,AAEL003142,AAEL003412,AAEL003477,AAEL003517,AAEL003522,AAEL003528,AAEL003661,AAEL003769,AAEL003822,AAEL004040,AAEL004110,AAEL004282,AAEL004288,AAEL004327,AAEL004345,AAEL004866,AAEL004974,AAEL005092,AAEL005425,AAEL005468,AAEL005799,AAEL006172,AAE…	9.8	1.48	1.61	5.26258e-05	0.00082243	0.0499419
GO:0001522	pseudouridine synthesis	12	6	AAEL002843,AAEL003514,AAEL004376,AAEL004663,AAEL010362,AAEL017113,	50	7.58	14.27	5.28643e-05	0.00082243	0.0501682
GO:0006403	RNA localization	17	7	AAEL001716,AAEL002012,AAEL003908,AAEL004053,AAEL006075,AAEL007066,AAEL009839,	41.2	6.24	10	5.72275e-05	0.000865342	0.0543089
GO:0042274	ribosomal small subunit biogenesis	8	5	AAEL002322,AAEL005628,AAEL006469,AAEL006972,AAEL010970,	62.5	9.47	23.76	5.83581e-05	0.000865342	0.0553819
GO:0043484	regulation of RNA splicing	8	5	AAEL007239,AAEL011568,AAEL019929,AAEL020820,AAEL022912,	62.5	9.47	23.76	5.83581e-05	0.000865342	0.0553819
GO:0097659	nucleic acid-templated transcription	186	27	AAEL001339,AAEL003528,AAEL005368,AAEL006172,AAEL007056,AAEL007496,AAEL007568,AAEL008584,AAEL008716,AAEL008794,AAEL010468,AAEL010607,AAEL011701,AAEL011866,AAEL012284,AAEL013134,AAEL013205,AAEL013700,AAEL013725,AAEL017010,AAEL017156,AAEL017213,AAEL018113,AAEL021175,AAEL022065,AAEL026468,AAEL027116,	14.5	2.2	2.46	8.59516e-05	0.00123588	0.0815681
GO:0006351	transcription, DNA-templated	186	27	AAEL001339,AAEL003528,AAEL005368,AAEL006172,AAEL007056,AAEL007496,AAEL007568,AAEL008584,AAEL008716,AAEL008794,AAEL010468,AAEL010607,AAEL011701,AAEL011866,AAEL012284,AAEL013134,AAEL013205,AAEL013700,AAEL013725,AAEL017010,AAEL017156,AAEL017213,AAEL018113,AAEL021175,AAEL022065,AAEL026468,AAEL027116,	14.5	2.2	2.46	8.59516e-05	0.00123588	0.0815681
GO:0006289	nucleotide-excision repair	18	7	AAEL000404,AAEL006356,AAEL007056,AAEL011057,AAEL013205,AAEL025524,AAEL026470,	38.9	5.9	9.09	8.83381e-05	0.00125124	0.0838329
GO:0032774	RNA biosynthetic process	189	27	AAEL001339,AAEL003528,AAEL005368,AAEL006172,AAEL007056,AAEL007496,AAEL007568,AAEL008584,AAEL008716,AAEL008794,AAEL010468,AAEL010607,AAEL011701,AAEL011866,AAEL012284,AAEL013134,AAEL013205,AAEL013700,AAEL013725,AAEL017010,AAEL017156,AAEL017213,AAEL018113,AAEL021175,AAEL022065,AAEL026468,AAEL027116,	14.3	2.17	2.41	0.000113302	0.00158122	0.107523
GO:0000377	RNA splicing, via transesterification reactions with bulged adenosine as nucleophile	45	11	AAEL005025,AAEL006713,AAEL007203,AAEL009839,AAEL009959,AAEL010387,AAEL011251,AAEL011687,AAEL011745,AAEL020761,AAEL022970,	24.4	3.71	4.64	0.000122131	0.00163243	0.115902
GO:0000398	mRNA splicing, via spliceosome	45	11	AAEL005025,AAEL006713,AAEL007203,AAEL009839,AAEL009959,AAEL010387,AAEL011251,AAEL011687,AAEL011745,AAEL020761,AAEL022970,	24.4	3.71	4.64	0.000122131	0.00163243	0.115902
GO:0000375	RNA splicing, via transesterification reactions	45	11	AAEL005025,AAEL006713,AAEL007203,AAEL009839,AAEL009959,AAEL010387,AAEL011251,AAEL011687,AAEL011745,AAEL020761,AAEL022970,	24.4	3.71	4.64	0.000122131	0.00163243	0.115902
GO:0051028	mRNA transport	14	6	AAEL001716,AAEL003908,AAEL004053,AAEL006075,AAEL007066,AAEL009839,	42.9	6.5	10.7	0.000153212	0.00201942	0.145399
GO:0090305	nucleic acid phosphodiester bond hydrolysis	70	14	AAEL000118,AAEL000215,AAEL002232,AAEL002249,AAEL005628,AAEL007237,AAEL010007,AAEL010468,AAEL010932,AAEL011693,AAEL012690,AAEL023601,AAEL025704,AAEL026470,	20	3.03	3.59	0.000158268	0.00205748	0.150196
GO:0008380	RNA splicing	62	13	AAEL005025,AAEL006713,AAEL007203,AAEL009839,AAEL009959,AAEL010387,AAEL011251,AAEL011687,AAEL011745,AAEL020583,AAEL020761,AAEL022912,AAEL022970,	21	3.18	3.81	0.000163844	0.00210119	0.155488
GO:0044271	cellular nitrogen compound biosynthetic process	592	62	AAEL000199,AAEL000388,AAEL001044,AAEL001102,AAEL001218,AAEL001339,AAEL001378,AAEL003142,AAEL003528,AAEL003661,AAEL003822,AAEL003935,AAEL004327,AAEL004345,AAEL005368,AAEL006033,AAEL006172,AAEL006415,AAEL007056,AAEL007078,AAEL007496,AAEL007568,AAEL007718,AAEL008509,AAEL008584,AAEL008716,AAEL008794,AAEL009273,AAEL009908,AAEL010321,AAEL010468,AAEL010607,AAEL010691,AAEL010742,AAEL011395,AAEL011536,AAE…	10.5	1.59	1.72	0.000171687	0.00217242	0.162931
GO:0015931	nucleobase-containing compound transport	26	8	AAEL001716,AAEL002012,AAEL003908,AAEL004053,AAEL005411,AAEL006075,AAEL007066,AAEL009839,	30.8	4.66	6.35	0.00018546	0.00231581	0.176001
GO:0036211	protein modification process	672	68	AAEL000276,AAEL000284,AAEL000589,AAEL000730,AAEL001151,AAEL001339,AAEL002056,AAEL002329,AAEL002805,AAEL002808,AAEL003412,AAEL003477,AAEL003517,AAEL003522,AAEL003528,AAEL003769,AAEL004040,AAEL004110,AAEL004282,AAEL004288,AAEL004866,AAEL004974,AAEL005092,AAEL005425,AAEL005468,AAEL005799,AAEL006172,AAEL006539,AAEL007443,AAEL007501,AAEL007578,AAEL008181,AAEL009364,AAEL009382,AAEL009702,AAEL010321,AAE…	10.1	1.53	1.66	0.000230668	0.00278602	0.218904
GO:0006464	cellular protein modification process	672	68	AAEL000276,AAEL000284,AAEL000589,AAEL000730,AAEL001151,AAEL001339,AAEL002056,AAEL002329,AAEL002805,AAEL002808,AAEL003412,AAEL003477,AAEL003517,AAEL003522,AAEL003528,AAEL003769,AAEL004040,AAEL004110,AAEL004282,AAEL004288,AAEL004866,AAEL004974,AAEL005092,AAEL005425,AAEL005468,AAEL005799,AAEL006172,AAEL006539,AAEL007443,AAEL007501,AAEL007578,AAEL008181,AAEL009364,AAEL009382,AAEL009702,AAEL010321,AAE…	10.1	1.53	1.66	0.000230668	0.00278602	0.218904
GO:0006405	RNA export from nucleus	10	5	AAEL001716,AAEL002012,AAEL003908,AAEL006075,AAEL007066,	50	7.58	14.25	0.00023486	0.00278602	0.222882
GO:0000154	rRNA modification	10	5	AAEL000076,AAEL001037,AAEL004422,AAEL006469,AAEL010949,	50	7.58	14.25	0.00023486	0.00278602	0.222882
GO:0044249	cellular biosynthetic process	876	84	AAEL000109,AAEL000199,AAEL000388,AAEL000428,AAEL001044,AAEL001102,AAEL001151,AAEL001218,AAEL001339,AAEL001378,AAEL002329,AAEL002510,AAEL002805,AAEL002808,AAEL003142,AAEL003528,AAEL003661,AAEL003822,AAEL003935,AAEL004327,AAEL004345,AAEL004974,AAEL005092,AAEL005368,AAEL005468,AAEL006033,AAEL006172,AAEL006415,AAEL007056,AAEL007078,AAEL007496,AAEL007501,AAEL007568,AAEL007718,AAEL008181,AAEL008509,AAE…	9.6	1.45	1.57	0.000260982	0.00305768	0.247672
GO:0033036	macromolecule localization	264	33	AAEL000088,AAEL001709,AAEL001716,AAEL002012,AAEL003283,AAEL003573,AAEL003908,AAEL004035,AAEL004053,AAEL004756,AAEL005390,AAEL006075,AAEL006124,AAEL007066,AAEL007484,AAEL009039,AAEL009080,AAEL009287,AAEL009392,AAEL009531,AAEL009839,AAEL009926,AAEL010698,AAEL010900,AAEL011663,AAEL013541,AAEL020265,AAEL020307,AAEL020332,AAEL023242,AAEL023393,AAEL023829,AAEL027322,	12.5	1.89	2.07	0.000284065	0.00308344	0.269578
GO:0071702	organic substance transport	275	34	AAEL000088,AAEL001709,AAEL001716,AAEL002012,AAEL003283,AAEL003573,AAEL003908,AAEL004035,AAEL004053,AAEL004756,AAEL005390,AAEL005411,AAEL006075,AAEL006124,AAEL007066,AAEL007484,AAEL009039,AAEL009080,AAEL009287,AAEL009392,AAEL009531,AAEL009839,AAEL009926,AAEL010698,AAEL010900,AAEL011663,AAEL013541,AAEL014248,AAEL020265,AAEL020307,AAEL020332,AAEL023393,AAEL023829,AAEL027322,	12.4	1.87	2.05	0.000284294	0.00308344	0.269795
GO:0031050	dsRNA processing	3	3	AAEL003287,AAEL021519,AAEL026022,	100	15.16	inf	0.000285925	0.00308344	0.271343
GO:0030490	maturation of SSU-rRNA	3	3	AAEL002322,AAEL006972,AAEL010970,	100	15.16	inf	0.000285925	0.00308344	0.271343
GO:0035196	production of miRNAs involved in gene silencing by miRNA	3	3	AAEL003287,AAEL021519,AAEL026022,	100	15.16	inf	0.000285925	0.00308344	0.271343
GO:0070918	production of small RNA involved in gene silencing by RNA	3	3	AAEL003287,AAEL021519,AAEL026022,	100	15.16	inf	0.000285925	0.00308344	0.271343
GO:0031053	primary miRNA processing	3	3	AAEL003287,AAEL021519,AAEL026022,	100	15.16	inf	0.000285925	0.00308344	0.271343
GO:0010629	negative regulation of gene expression	76	14	AAEL003287,AAEL006867,AAEL007698,AAEL009382,AAEL009839,AAEL010598,AAEL011361,AAEL011810,AAEL011817,AAEL014203,AAEL021519,AAEL021977,AAEL026022,AAEL026536,	18.4	2.79	3.24	0.000389565	0.0041539	0.369697
GO:0002098	tRNA wobble uridine modification	11	5	AAEL000938,AAEL001036,AAEL002056,AAEL004896,AAEL013488,	45.5	6.89	11.87	0.000407248	0.00424702	0.386479
GO:0002097	tRNA wobble base modification	11	5	AAEL000938,AAEL001036,AAEL002056,AAEL004896,AAEL013488,	45.5	6.89	11.87	0.000407248	0.00424702	0.386479
GO:0106074	aminoacyl-tRNA metabolism involved in translational fidelity	7	4	AAEL000388,AAEL004327,AAEL006415,AAEL014489,	57.1	8.66	18.98	0.000559573	0.00558984	0.531035
GO:0006450	regulation of translational fidelity	7	4	AAEL000388,AAEL004327,AAEL006415,AAEL014489,	57.1	8.66	18.98	0.000559573	0.00558984	0.531035
GO:0006354	DNA-templated transcription, elongation	7	4	AAEL001339,AAEL003528,AAEL006172,AAEL008584,	57.1	8.66	18.98	0.000559573	0.00558984	0.531035
GO:0031167	rRNA methylation	7	4	AAEL000076,AAEL001037,AAEL004422,AAEL010949,	57.1	8.66	18.98	0.000559573	0.00558984	0.531035
GO:0018216	peptidyl-arginine methylation	12	5	AAEL003522,AAEL007578,AAEL010829,AAEL011877,AAEL021474,	41.7	6.32	10.18	0.00066038	0.00646083	0.6267
GO:0018195	peptidyl-arginine modification	12	5	AAEL003522,AAEL007578,AAEL010829,AAEL011877,AAEL021474,	41.7	6.32	10.18	0.00066038	0.00646083	0.6267
GO:0006281	DNA repair	110	17	AAEL000404,AAEL002407,AAEL004686,AAEL005245,AAEL006356,AAEL007056,AAEL007237,AAEL008960,AAEL011057,AAEL012826,AAEL013205,AAEL014250,AAEL014774,AAEL019807,AAEL023601,AAEL025524,AAEL026470,	15.5	2.34	2.63	0.000829628	0.00803385	0.787317
GO:0006974	cellular response to DNA damage stimulus	121	18	AAEL000404,AAEL002407,AAEL004686,AAEL005245,AAEL006356,AAEL007056,AAEL007237,AAEL008960,AAEL011057,AAEL011329,AAEL012826,AAEL013205,AAEL014250,AAEL014774,AAEL019807,AAEL023601,AAEL025524,AAEL026470,	14.9	2.26	2.51	0.000935798	0.00896402	0.888072
GO:0045184	establishment of protein localization	183	24	AAEL000088,AAEL001709,AAEL003283,AAEL003573,AAEL003908,AAEL004035,AAEL004053,AAEL004756,AAEL005390,AAEL006124,AAEL007484,AAEL009039,AAEL009080,AAEL009287,AAEL009392,AAEL009926,AAEL010698,AAEL010900,AAEL011663,AAEL013541,AAEL020265,AAEL020307,AAEL023242,AAEL027322,	13.1	1.99	2.18	0.000944575	0.00896402	0.896402
GO:0009058	biosynthetic process	941	86	AAEL000109,AAEL000199,AAEL000388,AAEL000428,AAEL000706,AAEL001044,AAEL001102,AAEL001151,AAEL001218,AAEL001339,AAEL001378,AAEL002329,AAEL002510,AAEL002805,AAEL002808,AAEL003142,AAEL003528,AAEL003661,AAEL003822,AAEL003935,AAEL004327,AAEL004345,AAEL004974,AAEL005092,AAEL005368,AAEL005468,AAEL006033,AAEL006172,AAEL006415,AAEL007056,AAEL007078,AAEL007496,AAEL007501,AAEL007568,AAEL007718,AAEL008181,AAE…	9.1	1.39	1.48	0.00102013	0.0095852	0.968106
GO:0031124	mRNA 3'-end processing	4	3	AAEL000118,AAEL001371,AAEL013869,	75	11.37	42.65	0.00108733	0.0101165	1
GO:1901576	organic substance biosynthetic process	905	83	AAEL000109,AAEL000199,AAEL000388,AAEL000428,AAEL001044,AAEL001102,AAEL001151,AAEL001218,AAEL001339,AAEL001378,AAEL002329,AAEL002510,AAEL002805,AAEL003142,AAEL003528,AAEL003661,AAEL003822,AAEL003935,AAEL004327,AAEL004345,AAEL004974,AAEL005092,AAEL005368,AAEL005468,AAEL006033,AAEL006172,AAEL006415,AAEL007056,AAEL007078,AAEL007496,AAEL007501,AAEL007568,AAEL007718,AAEL008181,AAEL008509,AAEL008584,AAE…	9.2	1.39	1.48	0.00112887	0.010401	1
GO:0015031	protein transport	178	23	AAEL000088,AAEL001709,AAEL003283,AAEL003573,AAEL003908,AAEL004035,AAEL004053,AAEL004756,AAEL005390,AAEL006124,AAEL007484,AAEL009039,AAEL009080,AAEL009287,AAEL009392,AAEL009926,AAEL010698,AAEL010900,AAEL011663,AAEL013541,AAEL020265,AAEL020307,AAEL027322,	12.9	1.96	2.14	0.00146213	0.013342	1
GO:0034654	nucleobase-containing compound biosynthetic process	302	34	AAEL001102,AAEL001339,AAEL003528,AAEL003935,AAEL005368,AAEL006033,AAEL006172,AAEL007056,AAEL007496,AAEL007568,AAEL008584,AAEL008716,AAEL008794,AAEL009273,AAEL010468,AAEL010607,AAEL010691,AAEL011536,AAEL011701,AAEL011866,AAEL012284,AAEL013134,AAEL013205,AAEL013700,AAEL013725,AAEL017010,AAEL017156,AAEL017213,AAEL018113,AAEL021175,AAEL022065,AAEL022948,AAEL026468,AAEL027116,	11.3	1.71	1.84	0.00152319	0.0137667	1
GO:0008104	protein localization	190	24	AAEL000088,AAEL001709,AAEL003283,AAEL003573,AAEL003908,AAEL004035,AAEL004053,AAEL004756,AAEL005390,AAEL006124,AAEL007484,AAEL009039,AAEL009080,AAEL009287,AAEL009392,AAEL009926,AAEL010698,AAEL010900,AAEL011663,AAEL013541,AAEL020265,AAEL020307,AAEL023242,AAEL027322,	12.6	1.91	2.08	0.00159571	0.0142861	1
GO:0018130	heterocycle biosynthetic process	339	37	AAEL000428,AAEL001102,AAEL001339,AAEL003528,AAEL003935,AAEL005368,AAEL006033,AAEL006172,AAEL007056,AAEL007496,AAEL007568,AAEL008584,AAEL008716,AAEL008794,AAEL009273,AAEL010321,AAEL010468,AAEL010607,AAEL010691,AAEL011536,AAEL011701,AAEL011866,AAEL012284,AAEL013134,AAEL013205,AAEL013700,AAEL013725,AAEL017010,AAEL017156,AAEL017213,AAEL018113,AAEL021175,AAEL022065,AAEL022615,AAEL022948,AAEL026468,AAE…	10.9	1.65	1.77	0.00168678	0.0149604	1
GO:0033554	cellular response to stress	138	19	AAEL000404,AAEL002407,AAEL004686,AAEL005245,AAEL006356,AAEL006474,AAEL007056,AAEL007237,AAEL008960,AAEL011057,AAEL011329,AAEL012826,AAEL013205,AAEL014250,AAEL014774,AAEL019807,AAEL023601,AAEL025524,AAEL026470,	13.8	2.09	2.29	0.00175512	0.0154223	1
GO:0006406	mRNA export from nucleus	9	4	AAEL001716,AAEL003908,AAEL006075,AAEL007066,	44.4	6.74	11.38	0.00181008	0.0156161	1
GO:0031123	RNA 3'-end processing	9	4	AAEL000118,AAEL001371,AAEL013869,AAEL024814,	44.4	6.74	11.38	0.00181008	0.0156161	1
GO:0019438	aromatic compound biosynthetic process	329	36	AAEL000428,AAEL001102,AAEL001339,AAEL003528,AAEL003935,AAEL005368,AAEL006033,AAEL006172,AAEL007056,AAEL007496,AAEL007568,AAEL008584,AAEL008716,AAEL008794,AAEL009273,AAEL010321,AAEL010468,AAEL010607,AAEL010691,AAEL011536,AAEL011701,AAEL011866,AAEL012284,AAEL013134,AAEL013205,AAEL013700,AAEL013725,AAEL017010,AAEL017156,AAEL017213,AAEL018113,AAEL021175,AAEL022065,AAEL022948,AAEL026468,AAEL027116,	10.9	1.66	1.78	0.00185331	0.0158449	1
GO:0006886	intracellular protein transport	120	17	AAEL001709,AAEL003283,AAEL003573,AAEL003908,AAEL004035,AAEL004756,AAEL005390,AAEL007484,AAEL009039,AAEL009080,AAEL009392,AAEL010698,AAEL010900,AAEL011663,AAEL013541,AAEL020265,AAEL027322,	14.2	2.15	2.37	0.00220426	0.0186772	1
GO:0000470	maturation of LSU-rRNA	5	3	AAEL001169,AAEL004455,AAEL005041,	60	9.1	21.32	0.00258482	0.0213304	1
GO:0035246	peptidyl-arginine N-methylation	5	3	AAEL007578,AAEL011877,AAEL021474,	60	9.1	21.32	0.00258482	0.0213304	1
GO:0070897	transcription preinitiation complex assembly	5	3	AAEL005368,AAEL010607,AAEL013725,	60	9.1	21.32	0.00258482	0.0213304	1
GO:1901362	organic cyclic compound biosynthetic process	348	37	AAEL000428,AAEL001102,AAEL001339,AAEL003528,AAEL003935,AAEL005368,AAEL006033,AAEL006172,AAEL007056,AAEL007496,AAEL007568,AAEL008584,AAEL008716,AAEL008794,AAEL009273,AAEL010321,AAEL010468,AAEL010607,AAEL010691,AAEL011536,AAEL011701,AAEL011866,AAEL012284,AAEL013134,AAEL013205,AAEL013700,AAEL013725,AAEL017010,AAEL017156,AAEL017213,AAEL018113,AAEL021175,AAEL022065,AAEL022615,AAEL022948,AAEL026468,AAE…	10.6	1.61	1.72	0.00266232	0.0217806	1
GO:0034613	cellular protein localization	133	18	AAEL001709,AAEL003283,AAEL003573,AAEL003908,AAEL004035,AAEL004756,AAEL005390,AAEL007484,AAEL009039,AAEL009080,AAEL009392,AAEL010698,AAEL010900,AAEL011663,AAEL013541,AAEL020265,AAEL023242,AAEL027322,	13.5	2.05	2.25	0.0027751	0.0225091	1
GO:0070727	cellular macromolecule localization	134	18	AAEL001709,AAEL003283,AAEL003573,AAEL003908,AAEL004035,AAEL004756,AAEL005390,AAEL007484,AAEL009039,AAEL009080,AAEL009392,AAEL010698,AAEL010900,AAEL011663,AAEL013541,AAEL020265,AAEL023242,AAEL027322,	13.4	2.04	2.23	0.00301417	0.0242411	1
GO:0051234	establishment of localization	977	86	AAEL000088,AAEL001029,AAEL001113,AAEL001497,AAEL001656,AAEL001709,AAEL001716,AAEL002012,AAEL002412,AAEL002538,AAEL002555,AAEL003283,AAEL003433,AAEL003573,AAEL003908,AAEL003964,AAEL004035,AAEL004053,AAEL004142,AAEL004332,AAEL004451,AAEL004479,AAEL004756,AAEL005390,AAEL005411,AAEL006075,AAEL006124,AAEL006362,AAEL006367,AAEL006514,AAEL007066,AAEL007462,AAEL007484,AAEL007979,AAEL008028,AAEL008557,AAE…	8.8	1.33	1.42	0.00304897	0.0243149	1
GO:0008213	protein alkylation	39	8	AAEL000284,AAEL003522,AAEL004282,AAEL007578,AAEL010829,AAEL011877,AAEL014536,AAEL021474,	20.5	3.11	3.68	0.0034086	0.0267335	1
GO:0006479	protein methylation	39	8	AAEL000284,AAEL003522,AAEL004282,AAEL007578,AAEL010829,AAEL011877,AAEL014536,AAEL021474,	20.5	3.11	3.68	0.0034086	0.0267335	1
GO:0006810	transport	968	85	AAEL000088,AAEL001029,AAEL001113,AAEL001497,AAEL001656,AAEL001709,AAEL001716,AAEL002012,AAEL002412,AAEL002538,AAEL002555,AAEL003283,AAEL003433,AAEL003573,AAEL003908,AAEL003964,AAEL004035,AAEL004053,AAEL004142,AAEL004332,AAEL004451,AAEL004479,AAEL004756,AAEL005390,AAEL005411,AAEL006075,AAEL006124,AAEL006362,AAEL006367,AAEL006514,AAEL007066,AAEL007462,AAEL007484,AAEL007979,AAEL008028,AAEL008557,AAE…	8.8	1.33	1.41	0.00344588	0.0268044	1
GO:0000469	cleavage involved in rRNA processing	2	2	AAEL005628,AAEL025704,	100	15.16	inf	0.00434567	0.0319693	1
GO:0001682	tRNA 5'-leader removal	2	2	AAEL000215,AAEL009542,	100	15.16	inf	0.00434567	0.0319693	1
GO:0000493	box H/ACA snoRNP assembly	2	2	AAEL002843,AAEL010376,	100	15.16	inf	0.00434567	0.0319693	1
GO:0019264	glycine biosynthetic process from serine	2	2	AAEL002510,AAEL025146,	100	15.16	inf	0.00434567	0.0319693	1
GO:0000462	maturation of SSU-rRNA from tricistronic rRNA transcript (SSU-rRNA, 5.8S rRNA, LSU-rRNA)	2	2	AAEL006972,AAEL010970,	100	15.16	inf	0.00434567	0.0319693	1
GO:0000491	small nucleolar ribonucleoprotein complex assembly	2	2	AAEL002843,AAEL010376,	100	15.16	inf	0.00434567	0.0319693	1
GO:0006378	mRNA polyadenylation	2	2	AAEL000118,AAEL001371,	100	15.16	inf	0.00434567	0.0319693	1
GO:0035195	gene silencing by miRNA	6	3	AAEL003287,AAEL021519,AAEL026022,	50	7.58	14.21	0.0049166	0.0356172	1
GO:0006368	transcription elongation from RNA polymerase II promoter	6	3	AAEL001339,AAEL003528,AAEL006172,	50	7.58	14.21	0.0049166	0.0356172	1
GO:0006401	RNA catabolic process	33	7	AAEL000659,AAEL006867,AAEL009067,AAEL010598,AAEL011817,AAEL021977,AAEL026536,	21.2	3.22	3.84	0.00498076	0.0358087	1
GO:0051179	localization	996	86	AAEL000088,AAEL001029,AAEL001113,AAEL001497,AAEL001656,AAEL001709,AAEL001716,AAEL002012,AAEL002412,AAEL002538,AAEL002555,AAEL003283,AAEL003433,AAEL003573,AAEL003908,AAEL003964,AAEL004035,AAEL004053,AAEL004142,AAEL004332,AAEL004451,AAEL004479,AAEL004756,AAEL005390,AAEL005411,AAEL006075,AAEL006124,AAEL006362,AAEL006367,AAEL006514,AAEL007066,AAEL007462,AAEL007484,AAEL007979,AAEL008028,AAEL008557,AAE…	8.6	1.31	1.38	0.00515345	0.0367716	1
GO:0006366	transcription by RNA polymerase II	26	6	AAEL001339,AAEL003528,AAEL006172,AAEL013205,AAEL013700,AAEL018113,	23.1	3.5	4.27	0.00594608	0.0421107	1
GO:0046700	heterocycle catabolic process	61	10	AAEL000428,AAEL000659,AAEL006867,AAEL009067,AAEL010598,AAEL011348,AAEL011817,AAEL012154,AAEL021977,AAEL026536,	16.4	2.49	2.8	0.00616489	0.0430182	1
GO:0044270	cellular nitrogen compound catabolic process	61	10	AAEL000428,AAEL000659,AAEL006867,AAEL009067,AAEL010598,AAEL011348,AAEL011817,AAEL012154,AAEL021977,AAEL026536,	16.4	2.49	2.8	0.00616489	0.0430182	1
GO:0034655	nucleobase-containing compound catabolic process	52	9	AAEL000659,AAEL006867,AAEL009067,AAEL010598,AAEL011348,AAEL011817,AAEL012154,AAEL021977,AAEL026536,	17.3	2.62	2.99	0.00639311	0.0442851	1
GO:1901566	organonitrogen compound biosynthetic process	499	47	AAEL000109,AAEL000199,AAEL000388,AAEL001044,AAEL001102,AAEL001151,AAEL001218,AAEL001378,AAEL002329,AAEL002510,AAEL002805,AAEL003142,AAEL003661,AAEL003822,AAEL004327,AAEL004345,AAEL004974,AAEL005092,AAEL005468,AAEL006033,AAEL006415,AAEL007078,AAEL007501,AAEL007718,AAEL008181,AAEL008509,AAEL009273,AAEL009908,AAEL010321,AAEL010742,AAEL011395,AAEL013058,AAEL013537,AAEL014702,AAEL014709,AAEL015631,AAE…	9.4	1.43	1.5	0.00822172	0.0565392	1
GO:0090501	RNA phosphodiester bond hydrolysis	37	7	AAEL000118,AAEL000215,AAEL002232,AAEL005628,AAEL010468,AAEL011693,AAEL025704,	18.9	2.87	3.33	0.00954936	0.0651967	1
GO:0010608	posttranscriptional regulation of gene expression	46	8	AAEL002808,AAEL003287,AAEL007718,AAEL021519,AAEL021977,AAEL023365,AAEL026022,AAEL026536,	17.4	2.64	3	0.00962982	0.0652764	1
GO:1901361	organic cyclic compound catabolic process	66	10	AAEL000428,AAEL000659,AAEL006867,AAEL009067,AAEL010598,AAEL011348,AAEL011817,AAEL012154,AAEL021977,AAEL026536,	15.2	2.3	2.55	0.0107358	0.0717486	1
GO:0019439	aromatic compound catabolic process	66	10	AAEL000428,AAEL000659,AAEL006867,AAEL009067,AAEL010598,AAEL011348,AAEL011817,AAEL012154,AAEL021977,AAEL026536,	15.2	2.3	2.55	0.0107358	0.0717486	1
GO:0043603	cellular amide metabolic process	295	30	AAEL000199,AAEL000388,AAEL001044,AAEL001218,AAEL003142,AAEL003661,AAEL003822,AAEL004327,AAEL004345,AAEL006381,AAEL006415,AAEL007078,AAEL007718,AAEL008509,AAEL009111,AAEL009908,AAEL010742,AAEL011395,AAEL013058,AAEL013537,AAEL014702,AAEL014709,AAEL019957,AAEL020101,AAEL023850,AAEL024119,AAEL024508,AAEL028015,AAEL028043,AAEL029004,	10.2	1.54	1.63	0.0118031	0.0743989	1
GO:0016073	snRNA metabolic process	8	3	AAEL007788,AAEL011147,AAEL024814,	37.5	5.68	8.53	0.0124585	0.0743989	1
GO:0016180	snRNA processing	8	3	AAEL007788,AAEL011147,AAEL024814,	37.5	5.68	8.53	0.0124585	0.0743989	1
GO:0006545	glycine biosynthetic process	3	2	AAEL002510,AAEL025146,	66.7	10.11	28.39	0.0124652	0.0743989	1
GO:0035999	tetrahydrofolate interconversion	3	2	AAEL002510,AAEL025146,	66.7	10.11	28.39	0.0124652	0.0743989	1
GO:0017183	peptidyl-diphthamide biosynthetic process from peptidyl-histidine	3	2	AAEL002808,AAEL023365,	66.7	10.11	28.39	0.0124652	0.0743989	1
GO:0006379	mRNA cleavage	3	2	AAEL000118,AAEL010468,	66.7	10.11	28.39	0.0124652	0.0743989	1
GO:0006376	mRNA splice site selection	3	2	AAEL011687,AAEL022970,	66.7	10.11	28.39	0.0124652	0.0743989	1
GO:0017182	peptidyl-diphthamide metabolic process	3	2	AAEL002808,AAEL023365,	66.7	10.11	28.39	0.0124652	0.0743989	1
GO:0000460	maturation of 5.8S rRNA	3	2	AAEL001169,AAEL005041,	66.7	10.11	28.39	0.0124652	0.0743989	1
GO:0099116	tRNA 5'-end processing	3	2	AAEL000215,AAEL009542,	66.7	10.11	28.39	0.0124652	0.0743989	1
GO:0000466	maturation of 5.8S rRNA from tricistronic rRNA transcript (SSU-rRNA, 5.8S rRNA, LSU-rRNA)	3	2	AAEL001169,AAEL005041,	66.7	10.11	28.39	0.0124652	0.0743989	1
GO:0018202	peptidyl-histidine modification	3	2	AAEL002808,AAEL023365,	66.7	10.11	28.39	0.0124652	0.0743989	1
GO:0000966	RNA 5'-end processing	3	2	AAEL000215,AAEL009542,	66.7	10.11	28.39	0.0124652	0.0743989	1
GO:0034471	ncRNA 5'-end processing	3	2	AAEL000215,AAEL009542,	66.7	10.11	28.39	0.0124652	0.0743989	1
GO:1900247	regulation of cytoplasmic translational elongation	3	2	AAEL002808,AAEL023365,	66.7	10.11	28.39	0.0124652	0.0743989	1
GO:0006419	alanyl-tRNA aminoacylation	3	2	AAEL001218,AAEL008509,	66.7	10.11	28.39	0.0124652	0.0743989	1
GO:0006518	peptide metabolic process	272	28	AAEL000199,AAEL000388,AAEL001044,AAEL001218,AAEL003142,AAEL003661,AAEL003822,AAEL004327,AAEL004345,AAEL006415,AAEL007078,AAEL007718,AAEL008509,AAEL009908,AAEL010742,AAEL011395,AAEL013058,AAEL013537,AAEL014702,AAEL014709,AAEL019957,AAEL020101,AAEL023850,AAEL024119,AAEL024508,AAEL028015,AAEL028043,AAEL029004,	10.3	1.56	1.65	0.0125907	0.0746788	1
GO:0006412	translation	252	26	AAEL000199,AAEL000388,AAEL001044,AAEL001218,AAEL003142,AAEL003661,AAEL003822,AAEL004327,AAEL004345,AAEL006415,AAEL007078,AAEL007718,AAEL008509,AAEL009908,AAEL010742,AAEL011395,AAEL013058,AAEL013537,AAEL014702,AAEL014709,AAEL020101,AAEL023850,AAEL024119,AAEL024508,AAEL028043,AAEL029004,	10.3	1.56	1.65	0.0153891	0.0907094	1
GO:0006950	response to stress	194	21	AAEL000404,AAEL002407,AAEL002583,AAEL004142,AAEL004686,AAEL005245,AAEL006356,AAEL006474,AAEL007056,AAEL007237,AAEL008960,AAEL011057,AAEL011329,AAEL012826,AAEL013205,AAEL014250,AAEL014774,AAEL019807,AAEL023601,AAEL025524,AAEL026470,	10.8	1.64	1.74	0.0170454	0.0998525	1
GO:0043043	peptide biosynthetic process	255	26	AAEL000199,AAEL000388,AAEL001044,AAEL001218,AAEL003142,AAEL003661,AAEL003822,AAEL004327,AAEL004345,AAEL006415,AAEL007078,AAEL007718,AAEL008509,AAEL009908,AAEL010742,AAEL011395,AAEL013058,AAEL013537,AAEL014702,AAEL014709,AAEL020101,AAEL023850,AAEL024119,AAEL024508,AAEL028043,AAEL029004,	10.2	1.55	1.63	0.0176631	0.101662	1
GO:0006606	protein import into nucleus	9	3	AAEL003908,AAEL010698,AAEL010900,	33.3	5.05	7.1	0.0177827	0.101662	1
GO:0009067	aspartate family amino acid biosynthetic process	9	3	AAEL000109,AAEL015631,AAEL025680,	33.3	5.05	7.1	0.0177827	0.101662	1
GO:0034504	protein localization to nucleus	9	3	AAEL003908,AAEL010698,AAEL010900,	33.3	5.05	7.1	0.0177827	0.101662	1
GO:0019752	carboxylic acid metabolic process	207	22	AAEL000109,AAEL000199,AAEL000388,AAEL000428,AAEL001044,AAEL001218,AAEL002510,AAEL003462,AAEL004059,AAEL004327,AAEL004345,AAEL006415,AAEL008509,AAEL009908,AAEL010951,AAEL011395,AAEL014702,AAEL014709,AAEL015631,AAEL023850,AAEL025146,AAEL025680,	10.6	1.61	1.71	0.0180295	0.10199	1
GO:1903311	regulation of mRNA metabolic process	16	4	AAEL011568,AAEL021977,AAEL022912,AAEL026536,	25	3.79	4.74	0.0180551	0.10199	1
GO:0006414	translational elongation	24	5	AAEL010742,AAEL013537,AAEL024119,AAEL024508,AAEL029004,	20.8	3.16	3.75	0.0183305	0.102933	1
GO:0043436	oxoacid metabolic process	208	22	AAEL000109,AAEL000199,AAEL000388,AAEL000428,AAEL001044,AAEL001218,AAEL002510,AAEL003462,AAEL004059,AAEL004327,AAEL004345,AAEL006415,AAEL008509,AAEL009908,AAEL010951,AAEL011395,AAEL014702,AAEL014709,AAEL015631,AAEL023850,AAEL025146,AAEL025680,	10.6	1.6	1.7	0.0189578	0.105829	1
GO:0006082	organic acid metabolic process	210	22	AAEL000109,AAEL000199,AAEL000388,AAEL000428,AAEL001044,AAEL001218,AAEL002510,AAEL003462,AAEL004059,AAEL004327,AAEL004345,AAEL006415,AAEL008509,AAEL009908,AAEL010951,AAEL011395,AAEL014702,AAEL014709,AAEL015631,AAEL023850,AAEL025146,AAEL025680,	10.5	1.59	1.68	0.0209261	0.116134	1
GO:0010605	negative regulation of macromolecule metabolic process	117	14	AAEL003287,AAEL006867,AAEL007698,AAEL009382,AAEL009839,AAEL010598,AAEL011361,AAEL011810,AAEL011817,AAEL014203,AAEL021519,AAEL021977,AAEL026022,AAEL026536,	12	1.81	1.94	0.0216547	0.119056	1
GO:1901607	alpha-amino acid biosynthetic process	25	5	AAEL000109,AAEL002510,AAEL015631,AAEL025146,AAEL025680,	20	3.03	3.56	0.0217035	0.119056	1
GO:0031929	TOR signaling	4	2	AAEL006865,AAEL027512,	50	7.58	14.2	0.023843	0.122973	1
GO:0007030	Golgi organization	4	2	AAEL000088,AAEL004756,	50	7.58	14.2	0.023843	0.122973	1
GO:0000463	maturation of LSU-rRNA from tricistronic rRNA transcript (SSU-rRNA, 5.8S rRNA, LSU-rRNA)	4	2	AAEL001169,AAEL005041,	50	7.58	14.2	0.023843	0.122973	1
GO:0048024	regulation of mRNA splicing, via spliceosome	4	2	AAEL011568,AAEL022912,	50	7.58	14.2	0.023843	0.122973	1
GO:0006685	sphingomyelin catabolic process	4	2	AAEL006381,AAEL009111,	50	7.58	14.2	0.023843	0.122973	1
GO:0006684	sphingomyelin metabolic process	4	2	AAEL006381,AAEL009111,	50	7.58	14.2	0.023843	0.122973	1
GO:0045292	mRNA cis splicing, via spliceosome	4	2	AAEL005025,AAEL009839,	50	7.58	14.2	0.023843	0.122973	1
GO:0043631	RNA polyadenylation	4	2	AAEL000118,AAEL001371,	50	7.58	14.2	0.023843	0.122973	1
GO:0002943	tRNA dihydrouridine synthesis	4	2	AAEL001171,AAEL012140,	50	7.58	14.2	0.023843	0.122973	1
GO:0016050	vesicle organization	4	2	AAEL004756,AAEL007484,	50	7.58	14.2	0.023843	0.122973	1
GO:0032781	positive regulation of ATP-dependent activity	4	2	AAEL005877,AAEL006356,	50	7.58	14.2	0.023843	0.122973	1
GO:0006383	transcription by RNA polymerase III	10	3	AAEL008794,AAEL010607,AAEL021175,	30	4.55	6.09	0.0241781	0.12336	1
GO:0051170	import into nucleus	10	3	AAEL003908,AAEL010698,AAEL010900,	30	4.55	6.09	0.0241781	0.12336	1
GO:0032392	DNA geometric change	26	5	AAEL000404,AAEL004686,AAEL008960,AAEL013205,AAEL025524,	19.2	2.92	3.39	0.0254552	0.127142	1
GO:0032508	DNA duplex unwinding	26	5	AAEL000404,AAEL004686,AAEL008960,AAEL013205,AAEL025524,	19.2	2.92	3.39	0.0254552	0.127142	1
GO:0008652	cellular amino acid biosynthetic process	26	5	AAEL000109,AAEL002510,AAEL015631,AAEL025146,AAEL025680,	19.2	2.92	3.39	0.0254552	0.127142	1
GO:0006402	mRNA catabolic process	26	5	AAEL006867,AAEL010598,AAEL011817,AAEL021977,AAEL026536,	19.2	2.92	3.39	0.0254552	0.127142	1
GO:0043604	amide biosynthetic process	264	26	AAEL000199,AAEL000388,AAEL001044,AAEL001218,AAEL003142,AAEL003661,AAEL003822,AAEL004327,AAEL004345,AAEL006415,AAEL007078,AAEL007718,AAEL008509,AAEL009908,AAEL010742,AAEL011395,AAEL013058,AAEL013537,AAEL014702,AAEL014709,AAEL020101,AAEL023850,AAEL024119,AAEL024508,AAEL028043,AAEL029004,	9.8	1.49	1.57	0.0261081	0.12972	1
GO:0009892	negative regulation of metabolic process	121	14	AAEL003287,AAEL006867,AAEL007698,AAEL009382,AAEL009839,AAEL010598,AAEL011361,AAEL011810,AAEL011817,AAEL014203,AAEL021519,AAEL021977,AAEL026022,AAEL026536,	11.6	1.75	1.87	0.0280468	0.138627	1
GO:0009069	serine family amino acid metabolic process	11	3	AAEL002510,AAEL004059,AAEL025146,	27.3	4.13	5.33	0.0316466	0.154808	1
GO:0000096	sulfur amino acid metabolic process	11	3	AAEL000109,AAEL004059,AAEL025680,	27.3	4.13	5.33	0.0316466	0.154808	1
GO:0015833	peptide transport	91	11	AAEL000088,AAEL001709,AAEL003908,AAEL004053,AAEL006124,AAEL007484,AAEL009039,AAEL009287,AAEL009926,AAEL010900,AAEL020307,	12.1	1.83	1.96	0.0365743	0.177406	1
GO:0006457	protein folding	48	7	AAEL003477,AAEL006520,AAEL007702,AAEL009946,AAEL011708,AAEL012827,AAEL014843,	14.6	2.21	2.43	0.0366401	0.177406	1
GO:0098876	vesicle-mediated transport to the plasma membrane	5	2	AAEL009926,AAEL010403,	40	6.06	9.46	0.0380151	0.182204	1
GO:0000290	deadenylation-dependent decapping of nuclear-transcribed mRNA	5	2	AAEL021977,AAEL026536,	40	6.06	9.46	0.0380151	0.182204	1
GO:0031047	gene silencing by RNA	29	5	AAEL003287,AAEL007698,AAEL009839,AAEL021519,AAEL026022,	17.2	2.61	2.96	0.0390948	0.186437	1
GO:0043094	cellular metabolic compound salvage	12	3	AAEL000109,AAEL001102,AAEL025680,	25	3.79	4.74	0.0401746	0.188741	1
GO:0140053	mitochondrial gene expression	12	3	AAEL008584,AAEL009908,AAEL010742,	25	3.79	4.74	0.0401746	0.188741	1
GO:0009066	aspartate family amino acid metabolic process	12	3	AAEL000109,AAEL015631,AAEL025680,	25	3.79	4.74	0.0401746	0.188741	1
GO:0016570	histone modification	49	7	AAEL000730,AAEL001339,AAEL003528,AAEL006172,AAEL009382,AAEL011117,AAEL014536,	14.3	2.17	2.37	0.040414	0.18893	1
GO:0035194	post-transcriptional gene silencing by RNA	13	3	AAEL003287,AAEL021519,AAEL026022,	23.1	3.5	4.26	0.0497352	0.212202	1
GO:0016441	posttranscriptional gene silencing	13	3	AAEL003287,AAEL021519,AAEL026022,	23.1	3.5	4.26	0.0497352	0.212202	1

## Sheet: 4hp_MF
ID	Name	Bgd count	Result count	Result gene list	Pct of bgd	Fold enrichment	Odds ratio	P-value	Benjamini	Bonferroni
GO:0003723	RNA binding	411	99	AAEL000076,AAEL000115,AAEL000118,AAEL000215,AAEL000388,AAEL000707,AAEL000708,AAEL001044,AAEL001218,AAEL001371,AAEL001997,AAEL002056,AAEL002719,AAEL002843,AAEL002888,AAEL003142,AAEL003352,AAEL003514,AAEL003661,AAEL003664,AAEL003768,AAEL003839,AAEL003916,AAEL004075,AAEL004368,AAEL004376,AAEL004415,AAEL004455,AAEL004663,AAEL005046,AAEL005163,AAEL005263,AAEL006713,AAEL006972,AAEL007078,AAEL007239,AAE…	24.1	3.65	5.04	2.72551e-31	1.3464e-28	1.3464e-28
GO:0140098	catalytic activity, acting on RNA	169	54	AAEL000076,AAEL000199,AAEL000215,AAEL000388,AAEL000938,AAEL001037,AAEL001044,AAEL001171,AAEL001218,AAEL002232,AAEL002329,AAEL004327,AAEL004345,AAEL004422,AAEL005628,AAEL006415,AAEL007496,AAEL007568,AAEL008124,AAEL008463,AAEL008509,AAEL008716,AAEL008794,AAEL009023,AAEL009067,AAEL009285,AAEL009603,AAEL009908,AAEL010349,AAEL010468,AAEL010949,AAEL010993,AAEL011395,AAEL011693,AAEL011701,AAEL011866,AAE…	32	4.84	7.1	1.29356e-23	3.1951e-21	6.39019e-21
GO:0140640	catalytic activity, acting on a nucleic acid	286	68	AAEL000076,AAEL000199,AAEL000215,AAEL000388,AAEL000404,AAEL000938,AAEL001037,AAEL001044,AAEL001171,AAEL001216,AAEL001218,AAEL001317,AAEL002232,AAEL002329,AAEL003935,AAEL004327,AAEL004345,AAEL004422,AAEL004686,AAEL004978,AAEL005628,AAEL006415,AAEL007150,AAEL007496,AAEL007568,AAEL008124,AAEL008463,AAEL008509,AAEL008716,AAEL008794,AAEL008960,AAEL009023,AAEL009067,AAEL009285,AAEL009603,AAEL009908,AAE…	23.8	3.6	4.77	2.73738e-21	4.50755e-19	1.35226e-18
GO:0016741	transferase activity, transferring one-carbon groups	112	34	AAEL000076,AAEL000284,AAEL000938,AAEL001037,AAEL002186,AAEL002510,AAEL002808,AAEL002888,AAEL003447,AAEL003522,AAEL003822,AAEL003922,AAEL004282,AAEL004422,AAEL006637,AAEL007578,AAEL008124,AAEL008941,AAEL009023,AAEL009603,AAEL010248,AAEL010349,AAEL010829,AAEL010949,AAEL011282,AAEL011877,AAEL012932,AAEL013968,AAEL013974,AAEL014096,AAEL020316,AAEL021474,AAEL021860,AAEL025146,	30.4	4.6	6.42	1.46753e-14	1.8124e-12	7.24959e-12
GO:0008168	methyltransferase activity	105	32	AAEL000076,AAEL000284,AAEL000938,AAEL001037,AAEL002186,AAEL002808,AAEL002888,AAEL003447,AAEL003522,AAEL003822,AAEL003922,AAEL004282,AAEL004422,AAEL006637,AAEL007578,AAEL008124,AAEL008941,AAEL009023,AAEL009603,AAEL010248,AAEL010349,AAEL010829,AAEL010949,AAEL011282,AAEL011877,AAEL012932,AAEL013968,AAEL013974,AAEL014096,AAEL020316,AAEL021474,AAEL021860,	30.5	4.62	6.45	7.82419e-14	7.7303e-12	3.86515e-11
GO:0140101	catalytic activity, acting on a tRNA	72	25	AAEL000199,AAEL000215,AAEL000388,AAEL000938,AAEL001044,AAEL001171,AAEL001218,AAEL002232,AAEL002329,AAEL004327,AAEL004345,AAEL006415,AAEL008124,AAEL008509,AAEL009603,AAEL009908,AAEL010349,AAEL010993,AAEL011395,AAEL012140,AAEL013968,AAEL014489,AAEL014702,AAEL014709,AAEL023850,	34.7	5.26	7.76	1.60405e-12	1.32067e-10	7.92399e-10
GO:0034062	5'-3' RNA polymerase activity	31	16	AAEL007496,AAEL007568,AAEL008716,AAEL008794,AAEL010468,AAEL011701,AAEL011866,AAEL012284,AAEL013134,AAEL013700,AAEL017010,AAEL017156,AAEL017213,AAEL021175,AAEL022065,AAEL027116,	51.6	7.82	15.42	1.29268e-11	7.09538e-10	6.38584e-09
GO:0097747	RNA polymerase activity	31	16	AAEL007496,AAEL007568,AAEL008716,AAEL008794,AAEL010468,AAEL011701,AAEL011866,AAEL012284,AAEL013134,AAEL013700,AAEL017010,AAEL017156,AAEL017213,AAEL021175,AAEL022065,AAEL027116,	51.6	7.82	15.42	1.29268e-11	7.09538e-10	6.38584e-09
GO:0003899	DNA-directed 5'-3' RNA polymerase activity	31	16	AAEL007496,AAEL007568,AAEL008716,AAEL008794,AAEL010468,AAEL011701,AAEL011866,AAEL012284,AAEL013134,AAEL013700,AAEL017010,AAEL017156,AAEL017213,AAEL021175,AAEL022065,AAEL027116,	51.6	7.82	15.42	1.29268e-11	7.09538e-10	6.38584e-09
GO:0016779	nucleotidyltransferase activity	68	22	AAEL002056,AAEL003935,AAEL005605,AAEL007496,AAEL007568,AAEL008716,AAEL008794,AAEL010468,AAEL011701,AAEL011866,AAEL012284,AAEL013134,AAEL013392,AAEL013700,AAEL017010,AAEL017156,AAEL017213,AAEL019670,AAEL021175,AAEL022065,AAEL022540,AAEL027116,	32.4	4.9	6.95	1.72056e-10	8.49958e-09	8.49958e-08
GO:0036094	small molecule binding	1176	128	AAEL000199,AAEL000388,AAEL000404,AAEL000589,AAEL000706,AAEL000834,AAEL001044,AAEL001091,AAEL001101,AAEL001171,AAEL001216,AAEL001218,AAEL001317,AAEL001657,AAEL001951,AAEL002510,AAEL003293,AAEL003433,AAEL003462,AAEL004059,AAEL004110,AAEL004327,AAEL004345,AAEL004686,AAEL004913,AAEL004978,AAEL005425,AAEL005605,AAEL006309,AAEL006415,AAEL006469,AAEL006474,AAEL006520,AAEL006539,AAEL006684,AAEL007150,AAE…	10.9	1.65	1.88	3.59883e-09	1.6162e-07	1.77782e-06
GO:1901363	heterocyclic compound binding	3501	301	AAEL000076,AAEL000115,AAEL000118,AAEL000199,AAEL000215,AAEL000388,AAEL000404,AAEL000428,AAEL000589,AAEL000643,AAEL000706,AAEL000707,AAEL000708,AAEL000832,AAEL000834,AAEL000938,AAEL001044,AAEL001091,AAEL001101,AAEL001171,AAEL001216,AAEL001218,AAEL001317,AAEL001371,AAEL001657,AAEL001951,AAEL001997,AAEL002056,AAEL002115,AAEL002145,AAEL002179,AAEL002407,AAEL002510,AAEL002719,AAEL002843,AAEL002888,AAE…	8.6	1.3	1.56	1.01409e-08	4.10982e-07	5.00959e-06
GO:0097159	organic cyclic compound binding	3503	301	AAEL000076,AAEL000115,AAEL000118,AAEL000199,AAEL000215,AAEL000388,AAEL000404,AAEL000428,AAEL000589,AAEL000643,AAEL000706,AAEL000707,AAEL000708,AAEL000832,AAEL000834,AAEL000938,AAEL001044,AAEL001091,AAEL001101,AAEL001171,AAEL001216,AAEL001218,AAEL001317,AAEL001371,AAEL001657,AAEL001951,AAEL001997,AAEL002056,AAEL002115,AAEL002145,AAEL002179,AAEL002407,AAEL002510,AAEL002719,AAEL002843,AAEL002888,AAE…	8.6	1.3	1.56	1.08153e-08	4.10982e-07	5.34276e-06
GO:0043168	anion binding	1083	116	AAEL000199,AAEL000388,AAEL000404,AAEL000589,AAEL000706,AAEL000834,AAEL001044,AAEL001101,AAEL001171,AAEL001216,AAEL001218,AAEL001317,AAEL001657,AAEL001951,AAEL002510,AAEL003293,AAEL003433,AAEL003462,AAEL004059,AAEL004110,AAEL004327,AAEL004345,AAEL004686,AAEL004913,AAEL004978,AAEL005425,AAEL005605,AAEL006415,AAEL006469,AAEL006474,AAEL006520,AAEL006539,AAEL007150,AAEL007443,AAEL007501,AAEL007702,AAE…	10.7	1.62	1.83	5.58707e-08	1.94056e-06	2.76001e-05
GO:0032555	purine ribonucleotide binding	940	104	AAEL000199,AAEL000388,AAEL000404,AAEL000589,AAEL001044,AAEL001101,AAEL001216,AAEL001218,AAEL001317,AAEL001657,AAEL001951,AAEL003293,AAEL003433,AAEL004110,AAEL004327,AAEL004345,AAEL004686,AAEL004913,AAEL004978,AAEL005425,AAEL005605,AAEL006309,AAEL006415,AAEL006469,AAEL006474,AAEL006520,AAEL006539,AAEL007150,AAEL007443,AAEL007702,AAEL007899,AAEL008463,AAEL008509,AAEL008625,AAEL008728,AAEL008902,AAE…	11.1	1.68	1.89	6.00766e-08	1.94056e-06	2.96778e-05
GO:0035639	purine ribonucleoside triphosphate binding	930	103	AAEL000199,AAEL000388,AAEL000404,AAEL000589,AAEL001044,AAEL001101,AAEL001216,AAEL001218,AAEL001317,AAEL001657,AAEL001951,AAEL003293,AAEL003433,AAEL004110,AAEL004327,AAEL004345,AAEL004686,AAEL004913,AAEL004978,AAEL005425,AAEL005605,AAEL006415,AAEL006469,AAEL006474,AAEL006520,AAEL006539,AAEL007150,AAEL007443,AAEL007702,AAEL007899,AAEL008463,AAEL008509,AAEL008625,AAEL008728,AAEL008902,AAEL008960,AAE…	11.1	1.68	1.89	6.6676e-08	1.94056e-06	3.29379e-05
GO:0017076	purine nucleotide binding	942	104	AAEL000199,AAEL000388,AAEL000404,AAEL000589,AAEL001044,AAEL001101,AAEL001216,AAEL001218,AAEL001317,AAEL001657,AAEL001951,AAEL003293,AAEL003433,AAEL004110,AAEL004327,AAEL004345,AAEL004686,AAEL004913,AAEL004978,AAEL005425,AAEL005605,AAEL006309,AAEL006415,AAEL006469,AAEL006474,AAEL006520,AAEL006539,AAEL007150,AAEL007443,AAEL007702,AAEL007899,AAEL008463,AAEL008509,AAEL008625,AAEL008728,AAEL008902,AAE…	11	1.67	1.88	6.70078e-08	1.94056e-06	3.31018e-05
GO:0008173	RNA methyltransferase activity	28	12	AAEL000076,AAEL000938,AAEL001037,AAEL004422,AAEL008124,AAEL009023,AAEL009603,AAEL010349,AAEL010949,AAEL013968,AAEL013974,AAEL020316,	42.9	6.5	10.78	7.07088e-08	1.94056e-06	3.49301e-05
GO:1901265	nucleoside phosphate binding	1105	117	AAEL000199,AAEL000388,AAEL000404,AAEL000589,AAEL000834,AAEL001044,AAEL001091,AAEL001101,AAEL001171,AAEL001216,AAEL001218,AAEL001317,AAEL001657,AAEL001951,AAEL003293,AAEL003433,AAEL004110,AAEL004327,AAEL004345,AAEL004686,AAEL004913,AAEL004978,AAEL005425,AAEL005605,AAEL006309,AAEL006415,AAEL006469,AAEL006474,AAEL006520,AAEL006539,AAEL006684,AAEL007150,AAEL007443,AAEL007702,AAEL007899,AAEL008463,AAE…	10.6	1.61	1.81	9.15538e-08	2.18011e-06	4.52276e-05
GO:0000166	nucleotide binding	1105	117	AAEL000199,AAEL000388,AAEL000404,AAEL000589,AAEL000834,AAEL001044,AAEL001091,AAEL001101,AAEL001171,AAEL001216,AAEL001218,AAEL001317,AAEL001657,AAEL001951,AAEL003293,AAEL003433,AAEL004110,AAEL004327,AAEL004345,AAEL004686,AAEL004913,AAEL004978,AAEL005425,AAEL005605,AAEL006309,AAEL006415,AAEL006469,AAEL006474,AAEL006520,AAEL006539,AAEL006684,AAEL007150,AAEL007443,AAEL007702,AAEL007899,AAEL008463,AAE…	10.6	1.61	1.81	9.15538e-08	2.18011e-06	4.52276e-05
GO:0032553	ribonucleotide binding	948	104	AAEL000199,AAEL000388,AAEL000404,AAEL000589,AAEL001044,AAEL001101,AAEL001216,AAEL001218,AAEL001317,AAEL001657,AAEL001951,AAEL003293,AAEL003433,AAEL004110,AAEL004327,AAEL004345,AAEL004686,AAEL004913,AAEL004978,AAEL005425,AAEL005605,AAEL006309,AAEL006415,AAEL006469,AAEL006474,AAEL006520,AAEL006539,AAEL007150,AAEL007443,AAEL007702,AAEL007899,AAEL008463,AAEL008509,AAEL008625,AAEL008728,AAEL008902,AAE…	11	1.66	1.87	9.26766e-08	2.18011e-06	4.57823e-05
GO:0032559	adenyl ribonucleotide binding	767	86	AAEL000199,AAEL000388,AAEL000404,AAEL000589,AAEL001044,AAEL001101,AAEL001216,AAEL001218,AAEL001317,AAEL001657,AAEL001951,AAEL003433,AAEL004110,AAEL004327,AAEL004345,AAEL004686,AAEL004978,AAEL005425,AAEL005605,AAEL006309,AAEL006415,AAEL006469,AAEL006474,AAEL006539,AAEL007150,AAEL007443,AAEL007702,AAEL007899,AAEL008463,AAEL008509,AAEL008625,AAEL008728,AAEL008902,AAEL008960,AAEL009067,AAEL009285,AAE…	11.2	1.7	1.89	5.50058e-07	1.23513e-05	0.000271728
GO:0005524	ATP binding	757	85	AAEL000199,AAEL000388,AAEL000404,AAEL000589,AAEL001044,AAEL001101,AAEL001216,AAEL001218,AAEL001317,AAEL001657,AAEL001951,AAEL003433,AAEL004110,AAEL004327,AAEL004345,AAEL004686,AAEL004978,AAEL005425,AAEL005605,AAEL006415,AAEL006469,AAEL006474,AAEL006539,AAEL007150,AAEL007443,AAEL007702,AAEL007899,AAEL008463,AAEL008509,AAEL008625,AAEL008728,AAEL008902,AAEL008960,AAEL009067,AAEL009285,AAEL009364,AAE…	11.2	1.7	1.89	6.06935e-07	1.26568e-05	0.000299826
GO:0030554	adenyl nucleotide binding	769	86	AAEL000199,AAEL000388,AAEL000404,AAEL000589,AAEL001044,AAEL001101,AAEL001216,AAEL001218,AAEL001317,AAEL001657,AAEL001951,AAEL003433,AAEL004110,AAEL004327,AAEL004345,AAEL004686,AAEL004978,AAEL005425,AAEL005605,AAEL006309,AAEL006415,AAEL006469,AAEL006474,AAEL006539,AAEL007150,AAEL007443,AAEL007702,AAEL007899,AAEL008463,AAEL008509,AAEL008625,AAEL008728,AAEL008902,AAEL008960,AAEL009067,AAEL009285,AAE…	11.2	1.7	1.89	6.14904e-07	1.26568e-05	0.000303763
GO:0008757	S-adenosylmethionine-dependent methyltransferase activity	59	16	AAEL000076,AAEL000284,AAEL001037,AAEL002808,AAEL003522,AAEL004422,AAEL007578,AAEL008124,AAEL009603,AAEL010349,AAEL010829,AAEL010949,AAEL011282,AAEL011877,AAEL013968,AAEL021474,	27.1	4.11	5.36	8.21464e-07	1.62321e-05	0.000405803
GO:0016740	transferase activity	1048	108	AAEL000076,AAEL000284,AAEL000589,AAEL000706,AAEL000730,AAEL000938,AAEL001037,AAEL001102,AAEL001151,AAEL001378,AAEL002056,AAEL002186,AAEL002329,AAEL002510,AAEL002808,AAEL002888,AAEL003447,AAEL003522,AAEL003822,AAEL003922,AAEL003935,AAEL004110,AAEL004282,AAEL004422,AAEL004866,AAEL004974,AAEL005092,AAEL005425,AAEL005605,AAEL005709,AAEL006239,AAEL006400,AAEL006469,AAEL006539,AAEL006637,AAEL007443,AAE…	10.3	1.56	1.74	1.19166e-06	2.26415e-05	0.00058868
GO:0003676	nucleic acid binding	2318	205	AAEL000076,AAEL000115,AAEL000118,AAEL000215,AAEL000388,AAEL000404,AAEL000643,AAEL000707,AAEL000708,AAEL000832,AAEL000938,AAEL001044,AAEL001216,AAEL001218,AAEL001317,AAEL001371,AAEL001657,AAEL001997,AAEL002056,AAEL002115,AAEL002145,AAEL002179,AAEL002407,AAEL002719,AAEL002843,AAEL002888,AAEL003142,AAEL003287,AAEL003352,AAEL003403,AAEL003514,AAEL003661,AAEL003664,AAEL003752,AAEL003768,AAEL003815,AAE…	8.8	1.34	1.52	1.29499e-06	2.36936e-05	0.000639726
GO:0004812	aminoacyl-tRNA ligase activity	44	13	AAEL000199,AAEL000388,AAEL001044,AAEL001218,AAEL002329,AAEL004327,AAEL004345,AAEL006415,AAEL008509,AAEL011395,AAEL014702,AAEL014709,AAEL023850,	29.5	4.48	6.03	3.08953e-06	5.26285e-05	0.00152623
GO:0016875	ligase activity, forming carbon-oxygen bonds	44	13	AAEL000199,AAEL000388,AAEL001044,AAEL001218,AAEL002329,AAEL004327,AAEL004345,AAEL006415,AAEL008509,AAEL011395,AAEL014702,AAEL014709,AAEL023850,	29.5	4.48	6.03	3.08953e-06	5.26285e-05	0.00152623
GO:0097367	carbohydrate derivative binding	1090	109	AAEL000199,AAEL000388,AAEL000404,AAEL000589,AAEL001044,AAEL001101,AAEL001216,AAEL001218,AAEL001317,AAEL001657,AAEL001951,AAEL003293,AAEL003433,AAEL004110,AAEL004327,AAEL004345,AAEL004686,AAEL004913,AAEL004978,AAEL005425,AAEL005605,AAEL006309,AAEL006415,AAEL006469,AAEL006474,AAEL006520,AAEL006539,AAEL007150,AAEL007443,AAEL007702,AAEL007899,AAEL008463,AAEL008509,AAEL008625,AAEL008728,AAEL008902,AAE…	10	1.52	1.67	4.40933e-06	7.26069e-05	0.00217821
GO:0017056	structural constituent of nuclear pore	11	6	AAEL001029,AAEL003908,AAEL008557,AAEL012489,AAEL025153,AAEL026104,	54.5	8.27	17.12	2.79935e-05	0.000446089	0.0138288
GO:0004386	helicase activity	78	16	AAEL000404,AAEL001216,AAEL001317,AAEL004686,AAEL004978,AAEL007150,AAEL008463,AAEL008960,AAEL009067,AAEL009285,AAEL011817,AAEL012962,AAEL013205,AAEL013400,AAEL025524,AAEL027472,	20.5	3.11	3.71	3.95614e-05	0.000610729	0.0195433
GO:0008175	tRNA methyltransferase activity	8	5	AAEL000938,AAEL008124,AAEL009603,AAEL010349,AAEL013968,	62.5	9.47	23.76	5.83581e-05	0.000873604	0.0288289
GO:0000049	tRNA binding	18	7	AAEL000388,AAEL001044,AAEL001218,AAEL002056,AAEL008509,AAEL010349,AAEL014489,	38.9	5.9	9.09	8.83381e-05	0.0012835	0.043639
GO:0005488	binding	6314	462	AAEL000076,AAEL000109,AAEL000115,AAEL000118,AAEL000199,AAEL000215,AAEL000276,AAEL000330,AAEL000388,AAEL000404,AAEL000422,AAEL000428,AAEL000436,AAEL000589,AAEL000643,AAEL000706,AAEL000707,AAEL000708,AAEL000709,AAEL000730,AAEL000832,AAEL000834,AAEL000875,AAEL000938,AAEL001029,AAEL001044,AAEL001091,AAEL001101,AAEL001151,AAEL001169,AAEL001171,AAEL001216,AAEL001218,AAEL001277,AAEL001317,AAEL001371,AAE…	7.3	1.11	1.32	0.000235352	0.00330933	0.116264
GO:0008536	Ran GTPase binding	15	6	AAEL003573,AAEL004035,AAEL005390,AAEL009080,AAEL009392,AAEL010698,	40	6.06	9.51	0.000241165	0.00330933	0.119136
GO:0016853	isomerase activity	76	14	AAEL000109,AAEL000574,AAEL002102,AAEL003477,AAEL003514,AAEL004376,AAEL004663,AAEL005799,AAEL010362,AAEL011536,AAEL011603,AAEL011632,AAEL013075,AAEL018168,	18.4	2.79	3.24	0.000389565	0.00520122	0.192445
GO:0002161	aminoacyl-tRNA editing activity	7	4	AAEL000388,AAEL004327,AAEL006415,AAEL014489,	57.1	8.66	18.98	0.000559573	0.00727445	0.276429
GO:0016274	protein-arginine N-methyltransferase activity	12	5	AAEL003522,AAEL007578,AAEL010829,AAEL011877,AAEL021474,	41.7	6.32	10.18	0.00066038	0.00815569	0.326228
GO:0016273	arginine N-methyltransferase activity	12	5	AAEL003522,AAEL007578,AAEL010829,AAEL011877,AAEL021474,	41.7	6.32	10.18	0.00066038	0.00815569	0.326228
GO:0016874	ligase activity	111	17	AAEL000199,AAEL000388,AAEL001044,AAEL001218,AAEL002329,AAEL004327,AAEL004345,AAEL006415,AAEL008509,AAEL009908,AAEL011395,AAEL014702,AAEL014709,AAEL015631,AAEL023676,AAEL023850,AAEL024700,	15.3	2.32	2.6	0.000921045	0.0110975	0.454996
GO:0032549	ribonucleoside binding	4	3	AAEL017010,AAEL017156,AAEL017213,	75	11.37	42.65	0.00108733	0.0127891	0.537143
GO:0008170	N-methyltransferase activity	41	9	AAEL000076,AAEL000284,AAEL003522,AAEL004422,AAEL007578,AAEL010349,AAEL010829,AAEL011877,AAEL021474,	22	3.33	4.02	0.00116404	0.013373	0.575037
GO:0016772	transferase activity, transferring phosphorus-containing groups	440	46	AAEL000589,AAEL001102,AAEL002056,AAEL003935,AAEL004110,AAEL005425,AAEL005605,AAEL006239,AAEL006539,AAEL007443,AAEL007496,AAEL007568,AAEL008716,AAEL008794,AAEL008894,AAEL009364,AAEL010468,AAEL010835,AAEL011114,AAEL011701,AAEL011857,AAEL011866,AAEL012094,AAEL012284,AAEL013002,AAEL013134,AAEL013392,AAEL013700,AAEL013939,AAEL017010,AAEL017156,AAEL017213,AAEL018144,AAEL018160,AAEL018251,AAEL019601,AAE…	10.5	1.58	1.7	0.00121706	0.0136643	0.601227
GO:0140657	ATP-dependent activity	233	28	AAEL000404,AAEL001101,AAEL001216,AAEL001317,AAEL003433,AAEL004686,AAEL004978,AAEL005245,AAEL006474,AAEL007150,AAEL008463,AAEL008625,AAEL008902,AAEL008960,AAEL009067,AAEL009285,AAEL011019,AAEL011817,AAEL012395,AAEL012700,AAEL012702,AAEL012962,AAEL013205,AAEL013400,AAEL018267,AAEL019896,AAEL025524,AAEL027472,	12	1.82	1.97	0.00147264	0.0161663	0.727484
GO:0009982	pseudouridine synthase activity	9	4	AAEL003514,AAEL004376,AAEL004663,AAEL010362,	44.4	6.74	11.38	0.00181008	0.0190251	0.894181
GO:0008649	rRNA methyltransferase activity	9	4	AAEL000076,AAEL001037,AAEL004422,AAEL010949,	44.4	6.74	11.38	0.00181008	0.0190251	0.894181
GO:0016866	intramolecular transferase activity	15	5	AAEL003514,AAEL004376,AAEL004663,AAEL010362,AAEL011536,	33.3	5.05	7.12	0.00212048	0.0218233	1
GO:0001671	ATPase activator activity	5	3	AAEL005877,AAEL006356,AAEL023516,	60	9.1	21.32	0.00258482	0.0250373	1
GO:0001882	nucleoside binding	5	3	AAEL017010,AAEL017156,AAEL017213,	60	9.1	21.32	0.00258482	0.0250373	1
GO:0140677	molecular function activator activity	5	3	AAEL005877,AAEL006356,AAEL023516,	60	9.1	21.32	0.00258482	0.0250373	1
GO:0140102	catalytic activity, acting on a rRNA	10	4	AAEL000076,AAEL001037,AAEL004422,AAEL010949,	40	6.06	9.49	0.00286023	0.0271722	1
GO:0051879	Hsp90 protein binding	2	2	AAEL005877,AAEL023516,	100	15.16	inf	0.00434567	0.0387176	1
GO:0004372	glycine hydroxymethyltransferase activity	2	2	AAEL002510,AAEL025146,	100	15.16	inf	0.00434567	0.0387176	1
GO:0043874	acireductone synthase activity	2	2	AAEL000109,AAEL025680,	100	15.16	inf	0.00434567	0.0387176	1
GO:0016818	hydrolase activity, acting on acid anhydrides, in phosphorus-containing anhydrides	228	26	AAEL000404,AAEL001101,AAEL001795,AAEL004913,AAEL005245,AAEL006474,AAEL008625,AAEL008902,AAEL008960,AAEL009287,AAEL009342,AAEL010742,AAEL011382,AAEL011602,AAEL012395,AAEL012700,AAEL012702,AAEL013620,AAEL014749,AAEL018267,AAEL018310,AAEL019896,AAEL020913,AAEL024119,AAEL025524,AAEL025525,	11.4	1.73	1.85	0.00438904	0.0387176	1
GO:0016817	hydrolase activity, acting on acid anhydrides	231	26	AAEL000404,AAEL001101,AAEL001795,AAEL004913,AAEL005245,AAEL006474,AAEL008625,AAEL008902,AAEL008960,AAEL009287,AAEL009342,AAEL010742,AAEL011382,AAEL011602,AAEL012395,AAEL012700,AAEL012702,AAEL013620,AAEL014749,AAEL018267,AAEL018310,AAEL019896,AAEL020913,AAEL024119,AAEL025524,AAEL025525,	11.3	1.71	1.83	0.00521657	0.0452103	1
GO:0008276	protein methyltransferase activity	35	7	AAEL000284,AAEL003522,AAEL004282,AAEL007578,AAEL010829,AAEL011877,AAEL021474,	20	3.03	3.56	0.00699185	0.0595512	1
GO:0003746	translation elongation factor activity	20	5	AAEL010742,AAEL013537,AAEL024119,AAEL024508,AAEL029004,	25	3.79	4.75	0.00831562	0.0696257	1
GO:0004518	nuclease activity	74	11	AAEL000215,AAEL002232,AAEL002249,AAEL005628,AAEL007237,AAEL010007,AAEL010932,AAEL011693,AAEL012690,AAEL023601,AAEL026470,	14.9	2.25	2.49	0.00881779	0.0725998	1
GO:0008135	translation factor activity, RNA binding	65	10	AAEL003661,AAEL007078,AAEL007718,AAEL010742,AAEL013058,AAEL013537,AAEL020101,AAEL024119,AAEL024508,AAEL029004,	15.4	2.33	2.6	0.00966238	0.0782495	1
GO:0090079	translation regulator activity, nucleic acid binding	66	10	AAEL003661,AAEL007078,AAEL007718,AAEL010742,AAEL013058,AAEL013537,AAEL020101,AAEL024119,AAEL024508,AAEL029004,	15.2	2.3	2.55	0.0107358	0.0855403	1
GO:0016423	tRNA (guanine) methyltransferase activity	3	2	AAEL009603,AAEL010349,	66.7	10.11	28.39	0.0124652	0.0919072	1
GO:0030515	snoRNA binding	3	2	AAEL006972,AAEL012260,	66.7	10.11	28.39	0.0124652	0.0919072	1
GO:0003950	NAD+ ADP-ribosyltransferase activity	3	2	AAEL011815,AAEL015651,	66.7	10.11	28.39	0.0124652	0.0919072	1
GO:0008376	acetylgalactosaminyltransferase activity	3	2	AAEL010569,AAEL024438,	66.7	10.11	28.39	0.0124652	0.0919072	1
GO:0004813	alanine-tRNA ligase activity	3	2	AAEL001218,AAEL008509,	66.7	10.11	28.39	0.0124652	0.0919072	1
GO:0003724	RNA helicase activity	15	4	AAEL008463,AAEL009067,AAEL009285,AAEL013400,	26.7	4.04	5.17	0.014271	0.10143	1
GO:0008186	ATP-dependent activity, acting on RNA	15	4	AAEL008463,AAEL009067,AAEL009285,AAEL013400,	26.7	4.04	5.17	0.014271	0.10143	1
GO:0070279	vitamin B6 binding	40	7	AAEL000706,AAEL002510,AAEL003462,AAEL004059,AAEL010951,AAEL022615,AAEL025146,	17.5	2.65	3.02	0.014578	0.10143	1
GO:0030170	pyridoxal phosphate binding	40	7	AAEL000706,AAEL002510,AAEL003462,AAEL004059,AAEL010951,AAEL022615,AAEL025146,	17.5	2.65	3.02	0.014578	0.10143	1
GO:0045182	translation regulator activity	70	10	AAEL003661,AAEL007078,AAEL007718,AAEL010742,AAEL013058,AAEL013537,AAEL020101,AAEL024119,AAEL024508,AAEL029004,	14.3	2.17	2.38	0.0159536	0.10946	1
GO:0016462	pyrophosphatase activity	220	23	AAEL001101,AAEL001795,AAEL004913,AAEL005245,AAEL006474,AAEL008625,AAEL008902,AAEL009287,AAEL009342,AAEL010742,AAEL011382,AAEL011602,AAEL012395,AAEL012700,AAEL012702,AAEL013620,AAEL014749,AAEL018267,AAEL018310,AAEL019896,AAEL020913,AAEL024119,AAEL025525,	10.5	1.58	1.67	0.0189223	0.12805	1
GO:0043167	ion binding	2684	200	AAEL000109,AAEL000199,AAEL000388,AAEL000404,AAEL000428,AAEL000589,AAEL000706,AAEL000730,AAEL000834,AAEL001044,AAEL001091,AAEL001101,AAEL001171,AAEL001216,AAEL001218,AAEL001277,AAEL001317,AAEL001657,AAEL001855,AAEL001951,AAEL002068,AAEL002115,AAEL002455,AAEL002510,AAEL003032,AAEL003293,AAEL003403,AAEL003433,AAEL003462,AAEL003509,AAEL003517,AAEL003752,AAEL003769,AAEL003815,AAEL004057,AAEL004059,AAE…	7.5	1.13	1.19	0.023487	0.152967	1
GO:0004526	ribonuclease P activity	4	2	AAEL000215,AAEL002232,	50	7.58	14.2	0.023843	0.152967	1
GO:0004767	sphingomyelin phosphodiesterase activity	4	2	AAEL006381,AAEL009111,	50	7.58	14.2	0.023843	0.152967	1
GO:0017150	tRNA dihydrouridine synthase activity	4	2	AAEL001171,AAEL012140,	50	7.58	14.2	0.023843	0.152967	1
GO:0005548	phospholipid transporter activity	10	3	AAEL020332,AAEL023393,AAEL023829,	30	4.55	6.09	0.0241781	0.153128	1
GO:0004527	exonuclease activity	26	5	AAEL010007,AAEL010932,AAEL012690,AAEL023601,AAEL026470,	19.2	2.92	3.39	0.0254552	0.159176	1
GO:0016887	ATP hydrolysis activity	78	10	AAEL001101,AAEL005245,AAEL006474,AAEL008625,AAEL008902,AAEL012395,AAEL012700,AAEL012702,AAEL018267,AAEL019896,	12.8	1.94	2.1	0.0316868	0.195666	1
GO:0017111	nucleoside-triphosphatase activity	208	21	AAEL001101,AAEL004913,AAEL005245,AAEL006474,AAEL008625,AAEL008902,AAEL009287,AAEL009342,AAEL010742,AAEL011382,AAEL012395,AAEL012700,AAEL012702,AAEL013620,AAEL014749,AAEL018267,AAEL018310,AAEL019896,AAEL020913,AAEL024119,AAEL025525,	10.1	1.53	1.61	0.0337403	0.201465	1
GO:0003678	DNA helicase activity	28	5	AAEL000404,AAEL004686,AAEL008960,AAEL013205,AAEL025524,	17.9	2.71	3.09	0.0341418	0.201465	1
GO:0051082	unfolded protein binding	28	5	AAEL007702,AAEL009946,AAEL011708,AAEL012827,AAEL014843,	17.9	2.71	3.09	0.0341418	0.201465	1
GO:0003824	catalytic activity	3624	262	AAEL000016,AAEL000038,AAEL000076,AAEL000109,AAEL000199,AAEL000215,AAEL000284,AAEL000388,AAEL000404,AAEL000428,AAEL000574,AAEL000589,AAEL000706,AAEL000730,AAEL000834,AAEL000938,AAEL001037,AAEL001044,AAEL001080,AAEL001091,AAEL001101,AAEL001102,AAEL001151,AAEL001171,AAEL001216,AAEL001218,AAEL001232,AAEL001317,AAEL001371,AAEL001378,AAEL001795,AAEL001855,AAEL002056,AAEL002068,AAEL002102,AAEL002186,AAE…	7.2	1.1	1.16	0.0342572	0.201465	1
GO:0031072	heat shock protein binding	5	2	AAEL005877,AAEL023516,	40	6.06	9.46	0.0380151	0.207555	1
GO:0003690	double-stranded DNA binding	20	4	AAEL002179,AAEL008392,AAEL010136,AAEL013725,	20	3.03	3.55	0.0390185	0.207555	1
GO:0003697	single-stranded DNA binding	12	3	AAEL007496,AAEL022065,AAEL026470,	25	3.79	4.74	0.0401746	0.207555	1
GO:0005525	GTP binding	177	18	AAEL003293,AAEL004913,AAEL006520,AAEL009287,AAEL009342,AAEL010403,AAEL010742,AAEL011135,AAEL011382,AAEL013620,AAEL013761,AAEL014749,AAEL014908,AAEL018310,AAEL019670,AAEL020913,AAEL024119,AAEL025525,	10.2	1.54	1.62	0.0440973	0.207555	1
GO:0019842	vitamin binding	61	8	AAEL000706,AAEL002510,AAEL003462,AAEL004059,AAEL007501,AAEL010951,AAEL022615,AAEL025146,	13.1	1.99	2.15	0.0460027	0.207555	1
GO:0019001	guanyl nucleotide binding	178	18	AAEL003293,AAEL004913,AAEL006520,AAEL009287,AAEL009342,AAEL010403,AAEL010742,AAEL011135,AAEL011382,AAEL013620,AAEL013761,AAEL014749,AAEL014908,AAEL018310,AAEL019670,AAEL020913,AAEL024119,AAEL025525,	10.1	1.53	1.61	0.0461779	0.207555	1
GO:0032561	guanyl ribonucleotide binding	178	18	AAEL003293,AAEL004913,AAEL006520,AAEL009287,AAEL009342,AAEL010403,AAEL010742,AAEL011135,AAEL011382,AAEL013620,AAEL013761,AAEL014749,AAEL014908,AAEL018310,AAEL019670,AAEL020913,AAEL024119,AAEL025525,	10.1	1.53	1.61	0.0461779	0.207555	1
GO:0008134	transcription factor binding	13	3	AAEL003768,AAEL004017,AAEL005368,	23.1	3.5	4.26	0.0497352	0.207555	1

## Sheet: 6hp_BP
ID	Name	Bgd count	Result count	Result gene list	Pct of bgd	Fold enrichment	Odds ratio	P-value	Benjamini	Bonferroni
GO:0006518	peptide metabolic process	272	99	AAEL000175,AAEL000180,AAEL000185,AAEL000210,AAEL000279,AAEL000467,AAEL000701,AAEL000947,AAEL000951,AAEL001200,AAEL001206,AAEL001439,AAEL001615,AAEL001909,AAEL001916,AAEL001974,AAEL002048,AAEL002334,AAEL002418,AAEL002748,AAEL002766,AAEL002783,AAEL002867,AAEL002993,AAEL003397,AAEL003409,AAEL003418,AAEL003704,AAEL003801,AAEL003913,AAEL003945,AAEL004034,AAEL004306,AAEL004347,AAEL004430,AAEL004433,AAE…	36.4	4.47	7.12	2.60808e-40	2.67328e-37	2.67328e-37
GO:0006412	translation	252	94	AAEL000175,AAEL000180,AAEL000185,AAEL000210,AAEL000279,AAEL000467,AAEL000701,AAEL000951,AAEL001200,AAEL001206,AAEL001439,AAEL001615,AAEL001909,AAEL001916,AAEL001974,AAEL002048,AAEL002334,AAEL002418,AAEL002748,AAEL002766,AAEL002783,AAEL002867,AAEL002993,AAEL003397,AAEL003409,AAEL003704,AAEL003801,AAEL003913,AAEL003945,AAEL004034,AAEL004306,AAEL004347,AAEL004430,AAEL004433,AAEL004527,AAEL004613,AAE…	37.3	4.58	7.37	2.55978e-39	1.09919e-36	2.62377e-36
GO:0043603	cellular amide metabolic process	295	102	AAEL000175,AAEL000180,AAEL000185,AAEL000210,AAEL000279,AAEL000467,AAEL000701,AAEL000947,AAEL000951,AAEL001200,AAEL001206,AAEL001439,AAEL001615,AAEL001909,AAEL001916,AAEL001974,AAEL002048,AAEL002334,AAEL002418,AAEL002748,AAEL002766,AAEL002783,AAEL002867,AAEL002993,AAEL003397,AAEL003409,AAEL003418,AAEL003704,AAEL003801,AAEL003913,AAEL003945,AAEL004034,AAEL004050,AAEL004297,AAEL004306,AAEL004347,AAE…	34.6	4.24	6.59	3.21713e-39	1.09919e-36	3.29756e-36
GO:0043043	peptide biosynthetic process	255	94	AAEL000175,AAEL000180,AAEL000185,AAEL000210,AAEL000279,AAEL000467,AAEL000701,AAEL000951,AAEL001200,AAEL001206,AAEL001439,AAEL001615,AAEL001909,AAEL001916,AAEL001974,AAEL002048,AAEL002334,AAEL002418,AAEL002748,AAEL002766,AAEL002783,AAEL002867,AAEL002993,AAEL003397,AAEL003409,AAEL003704,AAEL003801,AAEL003913,AAEL003945,AAEL004034,AAEL004306,AAEL004347,AAEL004430,AAEL004433,AAEL004527,AAEL004613,AAE…	36.9	4.53	7.23	8.1377e-39	2.08528e-36	8.34114e-36
GO:0043604	amide biosynthetic process	264	95	AAEL000175,AAEL000180,AAEL000185,AAEL000210,AAEL000279,AAEL000467,AAEL000701,AAEL000951,AAEL001200,AAEL001206,AAEL001439,AAEL001615,AAEL001909,AAEL001916,AAEL001974,AAEL002048,AAEL002334,AAEL002418,AAEL002748,AAEL002766,AAEL002783,AAEL002867,AAEL002993,AAEL003397,AAEL003409,AAEL003704,AAEL003801,AAEL003913,AAEL003945,AAEL004034,AAEL004297,AAEL004306,AAEL004347,AAEL004430,AAEL004433,AAEL004527,AAE…	36	4.42	6.97	3.34008e-38	6.84716e-36	3.42358e-35
GO:0010467	gene expression	698	163	AAEL000175,AAEL000180,AAEL000185,AAEL000210,AAEL000279,AAEL000418,AAEL000435,AAEL000467,AAEL000674,AAEL000677,AAEL000701,AAEL000922,AAEL000947,AAEL000951,AAEL001089,AAEL001200,AAEL001206,AAEL001363,AAEL001382,AAEL001400,AAEL001439,AAEL001615,AAEL001619,AAEL001909,AAEL001916,AAEL001931,AAEL001974,AAEL002048,AAEL002334,AAEL002418,AAEL002748,AAEL002766,AAEL002783,AAEL002818,AAEL002867,AAEL002993,AAE…	23.4	2.87	3.97	8.80885e-38	1.50485e-35	9.02907e-35
GO:1901566	organonitrogen compound biosynthetic process	499	128	AAEL000175,AAEL000180,AAEL000185,AAEL000210,AAEL000279,AAEL000383,AAEL000444,AAEL000467,AAEL000701,AAEL000951,AAEL001200,AAEL001206,AAEL001439,AAEL001615,AAEL001869,AAEL001909,AAEL001916,AAEL001974,AAEL002048,AAEL002174,AAEL002183,AAEL002198,AAEL002334,AAEL002418,AAEL002748,AAEL002766,AAEL002783,AAEL002804,AAEL002867,AAEL002993,AAEL002996,AAEL003397,AAEL003409,AAEL003704,AAEL003801,AAEL003913,AAE…	25.7	3.15	4.37	7.95595e-34	1.16498e-31	8.15485e-31
GO:0034645	cellular macromolecule biosynthetic process	603	139	AAEL000175,AAEL000180,AAEL000185,AAEL000210,AAEL000279,AAEL000383,AAEL000444,AAEL000467,AAEL000677,AAEL000701,AAEL000951,AAEL001200,AAEL001206,AAEL001400,AAEL001439,AAEL001615,AAEL001909,AAEL001916,AAEL001974,AAEL002048,AAEL002174,AAEL002183,AAEL002198,AAEL002334,AAEL002418,AAEL002748,AAEL002766,AAEL002783,AAEL002804,AAEL002867,AAEL002993,AAEL002996,AAEL003397,AAEL003401,AAEL003409,AAEL003552,AAE…	23.1	2.83	3.81	2.13834e-31	2.73975e-29	2.1918e-28
GO:0009059	macromolecule biosynthetic process	604	139	AAEL000175,AAEL000180,AAEL000185,AAEL000210,AAEL000279,AAEL000383,AAEL000444,AAEL000467,AAEL000677,AAEL000701,AAEL000951,AAEL001200,AAEL001206,AAEL001400,AAEL001439,AAEL001615,AAEL001909,AAEL001916,AAEL001974,AAEL002048,AAEL002174,AAEL002183,AAEL002198,AAEL002334,AAEL002418,AAEL002748,AAEL002766,AAEL002783,AAEL002804,AAEL002867,AAEL002993,AAEL002996,AAEL003397,AAEL003401,AAEL003409,AAEL003552,AAE…	23	2.82	3.8	2.57709e-31	2.93502e-29	2.64152e-28
GO:0009058	biosynthetic process	941	176	AAEL000175,AAEL000178,AAEL000180,AAEL000185,AAEL000210,AAEL000240,AAEL000279,AAEL000372,AAEL000383,AAEL000444,AAEL000467,AAEL000677,AAEL000701,AAEL000951,AAEL001200,AAEL001206,AAEL001331,AAEL001400,AAEL001439,AAEL001615,AAEL001740,AAEL001869,AAEL001909,AAEL001916,AAEL001974,AAEL002048,AAEL002174,AAEL002183,AAEL002198,AAEL002334,AAEL002399,AAEL002418,AAEL002748,AAEL002766,AAEL002783,AAEL002804,AAE…	18.7	2.3	2.98	7.05235e-28	7.22866e-26	7.22866e-25
GO:0034641	cellular nitrogen compound metabolic process	1114	196	AAEL000175,AAEL000180,AAEL000185,AAEL000210,AAEL000279,AAEL000293,AAEL000435,AAEL000444,AAEL000467,AAEL000674,AAEL000677,AAEL000701,AAEL000922,AAEL000947,AAEL000951,AAEL001089,AAEL001187,AAEL001200,AAEL001206,AAEL001363,AAEL001382,AAEL001400,AAEL001439,AAEL001615,AAEL001619,AAEL001869,AAEL001909,AAEL001916,AAEL001931,AAEL001974,AAEL002048,AAEL002077,AAEL002334,AAEL002418,AAEL002748,AAEL002766,AAE…	17.6	2.16	2.8	1.29111e-27	1.20308e-25	1.32338e-24
GO:0044249	cellular biosynthetic process	876	167	AAEL000175,AAEL000178,AAEL000180,AAEL000185,AAEL000210,AAEL000240,AAEL000279,AAEL000372,AAEL000383,AAEL000444,AAEL000467,AAEL000677,AAEL000701,AAEL000951,AAEL001200,AAEL001206,AAEL001400,AAEL001439,AAEL001615,AAEL001740,AAEL001869,AAEL001909,AAEL001916,AAEL001974,AAEL002048,AAEL002174,AAEL002183,AAEL002198,AAEL002334,AAEL002418,AAEL002748,AAEL002766,AAEL002783,AAEL002804,AAEL002867,AAEL002993,AAE…	19.1	2.34	3.03	2.25851e-27	1.92915e-25	2.31498e-24
GO:1901576	organic substance biosynthetic process	905	168	AAEL000175,AAEL000178,AAEL000180,AAEL000185,AAEL000210,AAEL000240,AAEL000279,AAEL000372,AAEL000383,AAEL000444,AAEL000467,AAEL000677,AAEL000701,AAEL000951,AAEL001200,AAEL001206,AAEL001400,AAEL001439,AAEL001615,AAEL001740,AAEL001869,AAEL001909,AAEL001916,AAEL001974,AAEL002048,AAEL002174,AAEL002183,AAEL002198,AAEL002334,AAEL002418,AAEL002748,AAEL002766,AAEL002783,AAEL002804,AAEL002867,AAEL002993,AAE…	18.6	2.28	2.93	3.68254e-26	2.90354e-24	3.7746e-23
GO:0044271	cellular nitrogen compound biosynthetic process	592	125	AAEL000175,AAEL000180,AAEL000185,AAEL000210,AAEL000279,AAEL000467,AAEL000677,AAEL000701,AAEL000951,AAEL001200,AAEL001206,AAEL001400,AAEL001439,AAEL001615,AAEL001869,AAEL001909,AAEL001916,AAEL001974,AAEL002048,AAEL002334,AAEL002418,AAEL002748,AAEL002766,AAEL002783,AAEL002867,AAEL002993,AAEL003397,AAEL003401,AAEL003409,AAEL003552,AAEL003704,AAEL003801,AAEL003913,AAEL003945,AAEL004034,AAEL004297,AAE…	21.1	2.59	3.34	1.89527e-24	1.38761e-22	1.94265e-21
GO:0044267	cellular protein metabolic process	974	169	AAEL000116,AAEL000175,AAEL000180,AAEL000185,AAEL000210,AAEL000279,AAEL000383,AAEL000444,AAEL000467,AAEL000701,AAEL000852,AAEL000947,AAEL000951,AAEL001038,AAEL001200,AAEL001206,AAEL001333,AAEL001439,AAEL001615,AAEL001622,AAEL001909,AAEL001916,AAEL001974,AAEL002048,AAEL002077,AAEL002174,AAEL002183,AAEL002198,AAEL002334,AAEL002418,AAEL002567,AAEL002645,AAEL002748,AAEL002766,AAEL002783,AAEL002804,AAE…	17.4	2.13	2.68	6.44577e-23	4.40461e-21	6.60691e-20
GO:0071705	nitrogen compound transport	209	64	AAEL000163,AAEL000983,AAEL001177,AAEL001405,AAEL001541,AAEL002349,AAEL002486,AAEL002523,AAEL003318,AAEL003377,AAEL004441,AAEL004523,AAEL004546,AAEL004914,AAEL004977,AAEL005217,AAEL005471,AAEL005856,AAEL006010,AAEL006050,AAEL006311,AAEL006463,AAEL006748,AAEL006870,AAEL007001,AAEL007261,AAEL007307,AAEL007441,AAEL007987,AAEL008128,AAEL008135,AAEL008434,AAEL008462,AAEL008741,AAEL009636,AAEL010012,AAE…	30.6	3.76	5.28	1.41273e-21	9.05031e-20	1.44805e-18
GO:0044237	cellular metabolic process	2282	302	AAEL000116,AAEL000175,AAEL000178,AAEL000180,AAEL000185,AAEL000210,AAEL000240,AAEL000279,AAEL000293,AAEL000372,AAEL000383,AAEL000435,AAEL000444,AAEL000467,AAEL000674,AAEL000677,AAEL000701,AAEL000852,AAEL000922,AAEL000947,AAEL000951,AAEL001038,AAEL001089,AAEL001187,AAEL001200,AAEL001206,AAEL001333,AAEL001363,AAEL001382,AAEL001400,AAEL001439,AAEL001615,AAEL001619,AAEL001622,AAEL001740,AAEL001869,AAE…	13.2	1.62	2.08	2.76426e-21	1.66668e-19	2.83336e-18
GO:0045184	establishment of protein localization	183	59	AAEL000163,AAEL000983,AAEL001177,AAEL001405,AAEL001541,AAEL002486,AAEL002523,AAEL003377,AAEL004441,AAEL004523,AAEL004546,AAEL004914,AAEL004977,AAEL005217,AAEL005471,AAEL005856,AAEL006010,AAEL006311,AAEL006463,AAEL006734,AAEL006870,AAEL007001,AAEL007261,AAEL007307,AAEL007441,AAEL007987,AAEL008128,AAEL008135,AAEL008434,AAEL008462,AAEL008741,AAEL009636,AAEL010012,AAEL010060,AAEL010538,AAEL010704,AAE…	32.2	3.96	5.67	3.19936e-21	1.82186e-19	3.27935e-18
GO:0008104	protein localization	190	60	AAEL000163,AAEL000983,AAEL001177,AAEL001405,AAEL001541,AAEL002486,AAEL002523,AAEL003377,AAEL004441,AAEL004523,AAEL004546,AAEL004914,AAEL004977,AAEL005217,AAEL005471,AAEL005856,AAEL006010,AAEL006311,AAEL006463,AAEL006734,AAEL006870,AAEL007001,AAEL007261,AAEL007307,AAEL007441,AAEL007987,AAEL008128,AAEL008135,AAEL008434,AAEL008462,AAEL008543,AAEL008741,AAEL009636,AAEL010012,AAEL010060,AAEL010538,AAE…	31.6	3.88	5.5	4.77146e-21	2.57408e-19	4.89074e-18
GO:0015031	protein transport	178	57	AAEL000163,AAEL000983,AAEL001177,AAEL001405,AAEL001541,AAEL002486,AAEL002523,AAEL003377,AAEL004441,AAEL004523,AAEL004546,AAEL004914,AAEL004977,AAEL005217,AAEL005471,AAEL005856,AAEL006010,AAEL006311,AAEL006463,AAEL006870,AAEL007001,AAEL007261,AAEL007307,AAEL007441,AAEL007987,AAEL008128,AAEL008135,AAEL008434,AAEL008462,AAEL008741,AAEL009636,AAEL010012,AAEL010060,AAEL010538,AAEL010704,AAEL010716,AAE…	32	3.93	5.6	2.22728e-20	1.14148e-18	2.28296e-17
GO:0044260	cellular macromolecule metabolic process	1408	209	AAEL000116,AAEL000175,AAEL000180,AAEL000185,AAEL000210,AAEL000279,AAEL000383,AAEL000444,AAEL000467,AAEL000674,AAEL000677,AAEL000701,AAEL000852,AAEL000922,AAEL000947,AAEL000951,AAEL001038,AAEL001187,AAEL001200,AAEL001206,AAEL001333,AAEL001400,AAEL001439,AAEL001615,AAEL001622,AAEL001909,AAEL001916,AAEL001974,AAEL002048,AAEL002077,AAEL002174,AAEL002183,AAEL002198,AAEL002334,AAEL002418,AAEL002567,AAE…	14.8	1.82	2.26	9.47278e-20	4.62362e-18	9.7096e-17
GO:0009987	cellular process	4254	471	AAEL000077,AAEL000116,AAEL000163,AAEL000175,AAEL000178,AAEL000180,AAEL000185,AAEL000210,AAEL000240,AAEL000279,AAEL000293,AAEL000301,AAEL000372,AAEL000383,AAEL000417,AAEL000435,AAEL000444,AAEL000467,AAEL000486,AAEL000641,AAEL000674,AAEL000677,AAEL000701,AAEL000782,AAEL000852,AAEL000902,AAEL000922,AAEL000947,AAEL000951,AAEL000963,AAEL000983,AAEL001005,AAEL001038,AAEL001052,AAEL001089,AAEL001103,AAE…	11.1	1.36	1.84	1.32748e-18	6.18487e-17	1.36067e-15
GO:0033036	macromolecule localization	264	68	AAEL000163,AAEL000983,AAEL001177,AAEL001405,AAEL001541,AAEL002486,AAEL002523,AAEL002913,AAEL003377,AAEL004441,AAEL004523,AAEL004546,AAEL004914,AAEL004977,AAEL005217,AAEL005471,AAEL005856,AAEL006010,AAEL006050,AAEL006311,AAEL006463,AAEL006734,AAEL006748,AAEL006870,AAEL007001,AAEL007261,AAEL007307,AAEL007441,AAEL007987,AAEL008128,AAEL008135,AAEL008434,AAEL008462,AAEL008543,AAEL008741,AAEL009636,AAE…	25.8	3.16	4.15	2.60653e-18	1.1616e-16	2.67169e-15
GO:0071702	organic substance transport	275	68	AAEL000163,AAEL000983,AAEL001177,AAEL001405,AAEL001541,AAEL002349,AAEL002486,AAEL002523,AAEL002913,AAEL003318,AAEL003377,AAEL004441,AAEL004523,AAEL004546,AAEL004914,AAEL004977,AAEL005217,AAEL005471,AAEL005856,AAEL006010,AAEL006050,AAEL006311,AAEL006463,AAEL006748,AAEL006870,AAEL007001,AAEL007261,AAEL007307,AAEL007441,AAEL007987,AAEL008128,AAEL008135,AAEL008434,AAEL008462,AAEL008741,AAEL009636,AAE…	24.7	3.04	3.92	2.66872e-17	1.13976e-15	2.73544e-14
GO:0015833	peptide transport	91	36	AAEL000983,AAEL001405,AAEL001541,AAEL002486,AAEL002523,AAEL003318,AAEL004523,AAEL004546,AAEL004977,AAEL005217,AAEL005471,AAEL006010,AAEL006311,AAEL007261,AAEL008128,AAEL008135,AAEL008434,AAEL008462,AAEL010012,AAEL010538,AAEL010704,AAEL010716,AAEL011429,AAEL011650,AAEL012904,AAEL013098,AAEL013121,AAEL013230,AAEL013989,AAEL014375,AAEL019565,AAEL024500,AAEL024841,AAEL025078,AAEL025547,AAEL027249,	39.6	4.86	7.64	1.17773e-16	4.8287e-15	1.20718e-13
GO:0034613	cellular protein localization	133	42	AAEL000163,AAEL000983,AAEL001177,AAEL001405,AAEL003377,AAEL004441,AAEL004546,AAEL004914,AAEL004977,AAEL005471,AAEL005856,AAEL006463,AAEL006734,AAEL006870,AAEL007001,AAEL007307,AAEL007441,AAEL007987,AAEL008135,AAEL008434,AAEL008462,AAEL008741,AAEL009636,AAEL010012,AAEL010060,AAEL010704,AAEL011136,AAEL011429,AAEL011650,AAEL012218,AAEL013076,AAEL013098,AAEL013989,AAEL014375,AAEL015236,AAEL015275,AAE…	31.6	3.88	5.41	4.28081e-15	1.68763e-13	4.38783e-12
GO:0070727	cellular macromolecule localization	134	42	AAEL000163,AAEL000983,AAEL001177,AAEL001405,AAEL003377,AAEL004441,AAEL004546,AAEL004914,AAEL004977,AAEL005471,AAEL005856,AAEL006463,AAEL006734,AAEL006870,AAEL007001,AAEL007307,AAEL007441,AAEL007987,AAEL008135,AAEL008434,AAEL008462,AAEL008741,AAEL009636,AAEL010012,AAEL010060,AAEL010704,AAEL011136,AAEL011429,AAEL011650,AAEL012218,AAEL013076,AAEL013098,AAEL013989,AAEL014375,AAEL015236,AAEL015275,AAE…	31.3	3.85	5.35	5.75874e-15	2.18619e-13	5.9027e-12
GO:0006886	intracellular protein transport	120	39	AAEL000163,AAEL000983,AAEL001177,AAEL001405,AAEL003377,AAEL004441,AAEL004546,AAEL004914,AAEL004977,AAEL005471,AAEL005856,AAEL006463,AAEL006870,AAEL007001,AAEL007307,AAEL007441,AAEL007987,AAEL008135,AAEL008462,AAEL008741,AAEL009636,AAEL010012,AAEL010060,AAEL010704,AAEL011429,AAEL011650,AAEL012218,AAEL013076,AAEL013098,AAEL013989,AAEL014375,AAEL015236,AAEL015275,AAEL019565,AAEL024841,AAEL024853,AAE…	32.5	3.99	5.63	1.42476e-14	5.21564e-13	1.46038e-11
GO:0043170	macromolecule metabolic process	2352	284	AAEL000116,AAEL000175,AAEL000180,AAEL000185,AAEL000210,AAEL000231,AAEL000279,AAEL000293,AAEL000332,AAEL000383,AAEL000418,AAEL000435,AAEL000444,AAEL000467,AAEL000674,AAEL000677,AAEL000701,AAEL000852,AAEL000922,AAEL000947,AAEL000951,AAEL001038,AAEL001089,AAEL001187,AAEL001200,AAEL001206,AAEL001333,AAEL001363,AAEL001382,AAEL001400,AAEL001439,AAEL001615,AAEL001619,AAEL001622,AAEL001693,AAEL001797,AAE…	12.1	1.48	1.8	3.90852e-14	1.38146e-12	4.00623e-11
GO:0046907	intracellular transport	208	52	AAEL000163,AAEL000782,AAEL000983,AAEL001177,AAEL001405,AAEL001516,AAEL002913,AAEL003377,AAEL004441,AAEL004546,AAEL004914,AAEL004977,AAEL005471,AAEL005635,AAEL005856,AAEL006050,AAEL006463,AAEL006870,AAEL007001,AAEL007307,AAEL007441,AAEL007987,AAEL008135,AAEL008255,AAEL008462,AAEL008741,AAEL009636,AAEL010012,AAEL010060,AAEL010355,AAEL010704,AAEL011429,AAEL011650,AAEL012218,AAEL013076,AAEL013098,AAE…	25	3.07	3.93	1.04594e-13	3.57364e-12	1.07209e-10
GO:0006807	nitrogen compound metabolic process	2601	305	AAEL000116,AAEL000175,AAEL000180,AAEL000185,AAEL000210,AAEL000231,AAEL000279,AAEL000293,AAEL000332,AAEL000383,AAEL000418,AAEL000435,AAEL000444,AAEL000467,AAEL000674,AAEL000677,AAEL000701,AAEL000852,AAEL000922,AAEL000947,AAEL000951,AAEL001038,AAEL001089,AAEL001187,AAEL001200,AAEL001206,AAEL001333,AAEL001363,AAEL001382,AAEL001400,AAEL001439,AAEL001615,AAEL001619,AAEL001622,AAEL001693,AAEL001797,AAE…	11.7	1.44	1.75	1.35811e-13	4.49052e-12	1.39206e-10
GO:0051641	cellular localization	246	56	AAEL000163,AAEL000782,AAEL000983,AAEL001177,AAEL001405,AAEL001516,AAEL001859,AAEL002913,AAEL003377,AAEL004441,AAEL004546,AAEL004914,AAEL004977,AAEL005471,AAEL005635,AAEL005856,AAEL006050,AAEL006463,AAEL006734,AAEL006870,AAEL007001,AAEL007307,AAEL007441,AAEL007987,AAEL008135,AAEL008255,AAEL008434,AAEL008462,AAEL008741,AAEL009636,AAEL010012,AAEL010060,AAEL010355,AAEL010704,AAEL011136,AAEL011429,AAE…	22.8	2.79	3.48	7.91346e-13	2.53478e-11	8.1113e-10
GO:0051649	establishment of localization in cell	220	52	AAEL000163,AAEL000782,AAEL000983,AAEL001177,AAEL001405,AAEL001516,AAEL002913,AAEL003377,AAEL004441,AAEL004546,AAEL004914,AAEL004977,AAEL005471,AAEL005635,AAEL005856,AAEL006050,AAEL006463,AAEL006870,AAEL007001,AAEL007307,AAEL007441,AAEL007987,AAEL008135,AAEL008255,AAEL008462,AAEL008741,AAEL009636,AAEL010012,AAEL010060,AAEL010355,AAEL010704,AAEL011429,AAEL011650,AAEL012218,AAEL013076,AAEL013098,AAE…	23.6	2.9	3.64	1.13054e-12	3.51151e-11	1.1588e-09
GO:0016070	RNA metabolic process	517	90	AAEL000293,AAEL000435,AAEL000674,AAEL000677,AAEL000922,AAEL001089,AAEL001187,AAEL001200,AAEL001206,AAEL001363,AAEL001382,AAEL001400,AAEL001619,AAEL001931,AAEL002048,AAEL002748,AAEL002766,AAEL002818,AAEL002867,AAEL003336,AAEL003401,AAEL003552,AAEL003695,AAEL003913,AAEL003945,AAEL004291,AAEL004552,AAEL004571,AAEL004613,AAEL005037,AAEL005279,AAEL005719,AAEL005728,AAEL005831,AAEL006135,AAEL006401,AAE…	17.4	2.14	2.53	1.94379e-12	5.85996e-11	1.99238e-09
GO:0019538	protein metabolic process	1592	204	AAEL000116,AAEL000175,AAEL000180,AAEL000185,AAEL000210,AAEL000231,AAEL000279,AAEL000332,AAEL000383,AAEL000418,AAEL000444,AAEL000467,AAEL000701,AAEL000852,AAEL000947,AAEL000951,AAEL001038,AAEL001200,AAEL001206,AAEL001333,AAEL001439,AAEL001615,AAEL001622,AAEL001693,AAEL001797,AAEL001839,AAEL001846,AAEL001909,AAEL001916,AAEL001974,AAEL002048,AAEL002077,AAEL002174,AAEL002183,AAEL002198,AAEL002334,AAE…	12.8	1.57	1.85	2.69053e-12	7.87942e-11	2.7578e-09
GO:0006399	tRNA metabolic process	100	32	AAEL001089,AAEL001200,AAEL001206,AAEL001400,AAEL001931,AAEL002048,AAEL002748,AAEL002766,AAEL002867,AAEL003336,AAEL003913,AAEL004571,AAEL004613,AAEL005037,AAEL005279,AAEL005728,AAEL005831,AAEL006577,AAEL006769,AAEL006938,AAEL007130,AAEL007934,AAEL008680,AAEL009156,AAEL010816,AAEL011655,AAEL012624,AAEL013521,AAEL014040,AAEL014099,AAEL021595,AAEL022886,	32	3.93	5.46	5.45297e-12	1.55258e-10	5.5893e-09
GO:0044238	primary metabolic process	2834	318	AAEL000116,AAEL000175,AAEL000180,AAEL000185,AAEL000210,AAEL000231,AAEL000279,AAEL000293,AAEL000332,AAEL000372,AAEL000383,AAEL000418,AAEL000435,AAEL000444,AAEL000467,AAEL000674,AAEL000677,AAEL000701,AAEL000852,AAEL000922,AAEL000947,AAEL000951,AAEL001038,AAEL001089,AAEL001187,AAEL001200,AAEL001206,AAEL001333,AAEL001363,AAEL001382,AAEL001400,AAEL001439,AAEL001597,AAEL001615,AAEL001619,AAEL001622,AAE…	11.2	1.38	1.66	1.15257e-11	3.19294e-10	1.18139e-08
GO:0006413	translational initiation	42	20	AAEL000175,AAEL000185,AAEL001916,AAEL002334,AAEL003945,AAEL004347,AAEL005279,AAEL005796,AAEL005825,AAEL006115,AAEL007945,AAEL011527,AAEL012279,AAEL012661,AAEL013144,AAEL013675,AAEL014262,AAEL014715,AAEL023028,AAEL023347,	47.6	5.85	10.46	1.23364e-11	3.32758e-10	1.26448e-08
GO:0043038	amino acid activation	44	20	AAEL001200,AAEL001206,AAEL002048,AAEL002748,AAEL002766,AAEL002867,AAEL003913,AAEL004613,AAEL005037,AAEL005728,AAEL005831,AAEL006577,AAEL006769,AAEL006938,AAEL007130,AAEL010816,AAEL011655,AAEL013521,AAEL014099,AAEL022886,	45.5	5.58	9.59	3.61158e-11	9.25467e-10	3.70187e-08
GO:0043039	tRNA aminoacylation	44	20	AAEL001200,AAEL001206,AAEL002048,AAEL002748,AAEL002766,AAEL002867,AAEL003913,AAEL004613,AAEL005037,AAEL005728,AAEL005831,AAEL006577,AAEL006769,AAEL006938,AAEL007130,AAEL010816,AAEL011655,AAEL013521,AAEL014099,AAEL022886,	45.5	5.58	9.59	3.61158e-11	9.25467e-10	3.70187e-08
GO:0072657	protein localization to membrane	19	13	AAEL000163,AAEL001177,AAEL003377,AAEL004914,AAEL005856,AAEL006734,AAEL007441,AAEL007987,AAEL010060,AAEL011136,AAEL013076,AAEL015236,AAEL025151,	68.4	8.4	24.77	1.09505e-10	2.67245e-09	1.12243e-07
GO:0090150	establishment of protein localization to membrane	19	13	AAEL000163,AAEL001177,AAEL003377,AAEL004914,AAEL005856,AAEL006734,AAEL007441,AAEL007987,AAEL010060,AAEL011136,AAEL013076,AAEL015236,AAEL025151,	68.4	8.4	24.77	1.09505e-10	2.67245e-09	1.12243e-07
GO:0006418	tRNA aminoacylation for protein translation	42	19	AAEL001200,AAEL001206,AAEL002048,AAEL002748,AAEL002867,AAEL003913,AAEL004613,AAEL005037,AAEL005728,AAEL005831,AAEL006577,AAEL006769,AAEL006938,AAEL007130,AAEL010816,AAEL011655,AAEL013521,AAEL014099,AAEL022886,	45.2	5.55	9.49	1.24496e-10	2.79249e-09	1.27608e-07
GO:0072599	establishment of protein localization to endoplasmic reticulum	11	10	AAEL001177,AAEL003377,AAEL004914,AAEL005856,AAEL007441,AAEL007987,AAEL010060,AAEL013076,AAEL015236,AAEL025151,	90.9	11.16	114	1.25321e-10	2.79249e-09	1.28454e-07
GO:0045047	protein targeting to ER	11	10	AAEL001177,AAEL003377,AAEL004914,AAEL005856,AAEL007441,AAEL007987,AAEL010060,AAEL013076,AAEL015236,AAEL025151,	90.9	11.16	114	1.25321e-10	2.79249e-09	1.28454e-07
GO:0006612	protein targeting to membrane	11	10	AAEL001177,AAEL003377,AAEL004914,AAEL005856,AAEL007441,AAEL007987,AAEL010060,AAEL013076,AAEL015236,AAEL025151,	90.9	11.16	114	1.25321e-10	2.79249e-09	1.28454e-07
GO:0071704	organic substance metabolic process	3037	331	AAEL000116,AAEL000175,AAEL000178,AAEL000180,AAEL000185,AAEL000210,AAEL000231,AAEL000240,AAEL000279,AAEL000293,AAEL000332,AAEL000372,AAEL000383,AAEL000418,AAEL000435,AAEL000444,AAEL000467,AAEL000674,AAEL000677,AAEL000701,AAEL000852,AAEL000922,AAEL000947,AAEL000951,AAEL001038,AAEL001089,AAEL001187,AAEL001200,AAEL001206,AAEL001333,AAEL001363,AAEL001382,AAEL001400,AAEL001439,AAEL001597,AAEL001615,AAE…	10.9	1.34	1.6	1.48361e-10	3.23554e-09	1.5207e-07
GO:0006605	protein targeting	34	17	AAEL000163,AAEL001177,AAEL003377,AAEL004914,AAEL005471,AAEL005856,AAEL006463,AAEL007001,AAEL007441,AAEL007987,AAEL010060,AAEL012218,AAEL013076,AAEL015236,AAEL015275,AAEL025151,AAEL025660,	50	6.14	11.47	1.63837e-10	3.49861e-09	1.67933e-07
GO:0006457	protein folding	48	20	AAEL000301,AAEL000486,AAEL001005,AAEL001052,AAEL001103,AAEL001715,AAEL001838,AAEL002337,AAEL003180,AAEL004427,AAEL004438,AAEL004779,AAEL007650,AAEL009320,AAEL010063,AAEL010504,AAEL011584,AAEL012507,AAEL015100,AAEL026676,	41.7	5.11	8.21	2.50428e-10	5.23855e-09	2.56689e-07
GO:0007005	mitochondrion organization	44	19	AAEL000163,AAEL000963,AAEL002019,AAEL002293,AAEL002567,AAEL005171,AAEL007001,AAEL008149,AAEL008718,AAEL008811,AAEL009068,AAEL009883,AAEL011123,AAEL012218,AAEL014201,AAEL015275,AAEL021416,AAEL025232,AAEL025660,	43.2	5.3	8.73	3.35429e-10	6.8763e-09	3.43815e-07
GO:1901564	organonitrogen compound metabolic process	1948	229	AAEL000116,AAEL000175,AAEL000180,AAEL000185,AAEL000210,AAEL000231,AAEL000279,AAEL000332,AAEL000383,AAEL000418,AAEL000444,AAEL000467,AAEL000701,AAEL000852,AAEL000947,AAEL000951,AAEL001038,AAEL001200,AAEL001206,AAEL001333,AAEL001439,AAEL001615,AAEL001622,AAEL001693,AAEL001797,AAEL001839,AAEL001846,AAEL001869,AAEL001909,AAEL001916,AAEL001974,AAEL002048,AAEL002077,AAEL002174,AAEL002183,AAEL002198,AAE…	11.8	1.44	1.67	5.40112e-10	1.08552e-08	5.53615e-07
GO:0006520	cellular amino acid metabolic process	123	32	AAEL001200,AAEL001206,AAEL001869,AAEL002048,AAEL002399,AAEL002748,AAEL002766,AAEL002867,AAEL003913,AAEL004509,AAEL004613,AAEL005037,AAEL005728,AAEL005831,AAEL006577,AAEL006769,AAEL006938,AAEL007130,AAEL008366,AAEL008879,AAEL010008,AAEL010816,AAEL011655,AAEL012172,AAEL012318,AAEL012578,AAEL013521,AAEL013637,AAEL014099,AAEL022886,AAEL024717,AAEL026984,	26	3.19	4.07	2.09361e-09	4.12684e-08	2.14596e-06
GO:0001732	formation of cytoplasmic translation initiation complex	13	10	AAEL000175,AAEL002334,AAEL004347,AAEL006115,AAEL007945,AAEL012279,AAEL012661,AAEL013144,AAEL014715,AAEL023347,	76.9	9.44	37.99	2.79854e-09	5.32043e-08	2.86851e-06
GO:0090304	nucleic acid metabolic process	691	101	AAEL000293,AAEL000435,AAEL000674,AAEL000677,AAEL000922,AAEL001089,AAEL001187,AAEL001200,AAEL001206,AAEL001363,AAEL001382,AAEL001400,AAEL001619,AAEL001931,AAEL002048,AAEL002077,AAEL002748,AAEL002766,AAEL002818,AAEL002867,AAEL003336,AAEL003401,AAEL003552,AAEL003695,AAEL003913,AAEL003945,AAEL004291,AAEL004552,AAEL004571,AAEL004613,AAEL005037,AAEL005279,AAEL005719,AAEL005728,AAEL005831,AAEL006135,AAE…	14.6	1.79	2.05	2.80296e-09	5.32043e-08	2.87303e-06
GO:1901360	organic cyclic compound metabolic process	899	123	AAEL000293,AAEL000435,AAEL000444,AAEL000674,AAEL000677,AAEL000922,AAEL001089,AAEL001187,AAEL001200,AAEL001206,AAEL001363,AAEL001382,AAEL001400,AAEL001619,AAEL001869,AAEL001931,AAEL002048,AAEL002077,AAEL002748,AAEL002766,AAEL002818,AAEL002867,AAEL003336,AAEL003401,AAEL003552,AAEL003695,AAEL003913,AAEL003945,AAEL004050,AAEL004291,AAEL004297,AAEL004509,AAEL004552,AAEL004571,AAEL004613,AAEL005037,AAE…	13.7	1.68	1.91	2.90563e-09	5.403e-08	2.97827e-06
GO:0070972	protein localization to endoplasmic reticulum	16	11	AAEL001177,AAEL003377,AAEL004914,AAEL005856,AAEL007441,AAEL007987,AAEL008434,AAEL010060,AAEL013076,AAEL015236,AAEL025151,	68.8	8.44	25.1	2.95189e-09	5.403e-08	3.02568e-06
GO:0046483	heterocycle metabolic process	882	121	AAEL000293,AAEL000435,AAEL000444,AAEL000674,AAEL000677,AAEL000922,AAEL001089,AAEL001187,AAEL001200,AAEL001206,AAEL001363,AAEL001382,AAEL001400,AAEL001619,AAEL001869,AAEL001931,AAEL002048,AAEL002077,AAEL002748,AAEL002766,AAEL002818,AAEL002867,AAEL003336,AAEL003401,AAEL003552,AAEL003695,AAEL003913,AAEL003945,AAEL004050,AAEL004291,AAEL004297,AAEL004509,AAEL004552,AAEL004571,AAEL004613,AAEL005037,AAE…	13.7	1.68	1.92	3.38435e-09	5.9882e-08	3.46896e-06
GO:0051668	localization within membrane	23	13	AAEL000163,AAEL001177,AAEL003377,AAEL004914,AAEL005856,AAEL006734,AAEL007441,AAEL007987,AAEL010060,AAEL011136,AAEL013076,AAEL015236,AAEL025151,	56.5	6.94	14.86	3.38844e-09	5.9882e-08	3.47315e-06
GO:0016192	vesicle-mediated transport	139	34	AAEL000983,AAEL001405,AAEL001516,AAEL001541,AAEL001596,AAEL001859,AAEL004546,AAEL004977,AAEL005180,AAEL005217,AAEL006010,AAEL008135,AAEL008255,AAEL008462,AAEL009200,AAEL009828,AAEL010012,AAEL010704,AAEL011429,AAEL011650,AAEL012875,AAEL013098,AAEL013121,AAEL013230,AAEL014375,AAEL017562,AAEL019420,AAEL019565,AAEL022757,AAEL023407,AAEL024500,AAEL024841,AAEL025078,AAEL027249,	24.5	3	3.75	3.76157e-09	6.53494e-08	3.85561e-06
GO:0006139	nucleobase-containing compound metabolic process	841	116	AAEL000293,AAEL000435,AAEL000444,AAEL000674,AAEL000677,AAEL000922,AAEL001089,AAEL001187,AAEL001200,AAEL001206,AAEL001363,AAEL001382,AAEL001400,AAEL001619,AAEL001869,AAEL001931,AAEL002048,AAEL002077,AAEL002748,AAEL002766,AAEL002818,AAEL002867,AAEL003336,AAEL003401,AAEL003552,AAEL003695,AAEL003913,AAEL003945,AAEL004050,AAEL004291,AAEL004297,AAEL004552,AAEL004571,AAEL004613,AAEL005037,AAEL005279,AAE…	13.8	1.69	1.92	5.46268e-09	9.33208e-08	5.59925e-06
GO:0006725	cellular aromatic compound metabolic process	884	120	AAEL000293,AAEL000435,AAEL000444,AAEL000674,AAEL000677,AAEL000922,AAEL001089,AAEL001187,AAEL001200,AAEL001206,AAEL001363,AAEL001382,AAEL001400,AAEL001619,AAEL001869,AAEL001931,AAEL002048,AAEL002077,AAEL002748,AAEL002766,AAEL002818,AAEL002867,AAEL003336,AAEL003401,AAEL003552,AAEL003695,AAEL003913,AAEL003945,AAEL004050,AAEL004291,AAEL004297,AAEL004509,AAEL004552,AAEL004571,AAEL004613,AAEL005037,AAE…	13.6	1.67	1.89	7.48547e-09	1.2578e-07	7.6726e-06
GO:0008152	metabolic process	3712	381	AAEL000116,AAEL000175,AAEL000178,AAEL000180,AAEL000185,AAEL000210,AAEL000231,AAEL000240,AAEL000279,AAEL000293,AAEL000332,AAEL000372,AAEL000383,AAEL000418,AAEL000435,AAEL000444,AAEL000467,AAEL000559,AAEL000674,AAEL000677,AAEL000701,AAEL000852,AAEL000922,AAEL000947,AAEL000951,AAEL001038,AAEL001089,AAEL001187,AAEL001200,AAEL001206,AAEL001331,AAEL001333,AAEL001363,AAEL001382,AAEL001400,AAEL001439,AAE…	10.3	1.26	1.5	7.80805e-09	1.27916e-07	8.00325e-06
GO:0008380	RNA splicing	62	21	AAEL001363,AAEL001382,AAEL002818,AAEL003336,AAEL003695,AAEL006135,AAEL006401,AAEL006748,AAEL008719,AAEL009671,AAEL009914,AAEL010453,AAEL011233,AAEL011433,AAEL013061,AAEL014169,AAEL015199,AAEL017161,AAEL017543,AAEL025258,AAEL027935,	33.9	4.16	5.89	7.86212e-09	1.27916e-07	8.05868e-06
GO:0002183	cytoplasmic translational initiation	14	10	AAEL000175,AAEL002334,AAEL004347,AAEL006115,AAEL007945,AAEL012279,AAEL012661,AAEL013144,AAEL014715,AAEL023347,	71.4	8.77	28.49	9.07815e-09	1.45392e-07	9.30511e-06
GO:0033365	protein localization to organelle	48	18	AAEL000163,AAEL001177,AAEL003377,AAEL004914,AAEL005856,AAEL006463,AAEL007001,AAEL007441,AAEL007987,AAEL008434,AAEL010060,AAEL011136,AAEL012218,AAEL013076,AAEL015236,AAEL015275,AAEL025151,AAEL025660,	37.5	4.6	6.88	1.47652e-08	2.32836e-07	1.51343e-05
GO:0006614	SRP-dependent cotranslational protein targeting to membrane	9	8	AAEL001177,AAEL003377,AAEL004914,AAEL005856,AAEL007441,AAEL010060,AAEL013076,AAEL015236,	88.9	10.91	91	1.57465e-08	2.40897e-07	1.61401e-05
GO:0006613	cotranslational protein targeting to membrane	9	8	AAEL001177,AAEL003377,AAEL004914,AAEL005856,AAEL007441,AAEL010060,AAEL013076,AAEL015236,	88.9	10.91	91	1.57465e-08	2.40897e-07	1.61401e-05
GO:0072594	establishment of protein localization to organelle	39	16	AAEL000163,AAEL001177,AAEL003377,AAEL004914,AAEL005856,AAEL006463,AAEL007001,AAEL007441,AAEL007987,AAEL010060,AAEL012218,AAEL013076,AAEL015236,AAEL015275,AAEL025151,AAEL025660,	41	5.04	7.97	2.07596e-08	3.1292e-07	2.12786e-05
GO:0002181	cytoplasmic translation	15	10	AAEL000175,AAEL002334,AAEL004347,AAEL006115,AAEL007945,AAEL012279,AAEL012661,AAEL013144,AAEL014715,AAEL023347,	66.7	8.18	22.79	2.52428e-08	3.74983e-07	2.58738e-05
GO:0022618	ribonucleoprotein complex assembly	35	15	AAEL000175,AAEL001382,AAEL002334,AAEL004347,AAEL006115,AAEL007945,AAEL008719,AAEL011233,AAEL011433,AAEL012279,AAEL012661,AAEL013144,AAEL014715,AAEL017543,AAEL023347,	42.9	5.26	8.58	2.83162e-08	4.0879e-07	2.90241e-05
GO:0071826	ribonucleoprotein complex subunit organization	35	15	AAEL000175,AAEL001382,AAEL002334,AAEL004347,AAEL006115,AAEL007945,AAEL008719,AAEL011233,AAEL011433,AAEL012279,AAEL012661,AAEL013144,AAEL014715,AAEL017543,AAEL023347,	42.9	5.26	8.58	2.83162e-08	4.0879e-07	2.90241e-05
GO:0008150	biological process	5926	560	AAEL000077,AAEL000116,AAEL000163,AAEL000175,AAEL000178,AAEL000180,AAEL000185,AAEL000210,AAEL000231,AAEL000240,AAEL000279,AAEL000293,AAEL000301,AAEL000332,AAEL000372,AAEL000383,AAEL000417,AAEL000418,AAEL000435,AAEL000444,AAEL000467,AAEL000486,AAEL000559,AAEL000641,AAEL000674,AAEL000677,AAEL000701,AAEL000720,AAEL000782,AAEL000852,AAEL000902,AAEL000922,AAEL000947,AAEL000951,AAEL000963,AAEL000982,AAE…	9.4	1.16	1.46	3.95183e-08	5.62587e-07	4.05063e-05
GO:0009100	glycoprotein metabolic process	69	21	AAEL000383,AAEL000444,AAEL002174,AAEL002183,AAEL002198,AAEL002645,AAEL002804,AAEL002996,AAEL004228,AAEL009174,AAEL010227,AAEL010596,AAEL012034,AAEL012394,AAEL012511,AAEL013071,AAEL013078,AAEL019593,AAEL019605,AAEL022680,AAEL023188,	30.4	3.74	5.03	6.63902e-08	9.32192e-07	6.805e-05
GO:0070085	glycosylation	72	21	AAEL000383,AAEL000444,AAEL000559,AAEL002174,AAEL002183,AAEL002198,AAEL002483,AAEL002804,AAEL002996,AAEL004228,AAEL009174,AAEL010227,AAEL010596,AAEL012034,AAEL012511,AAEL013071,AAEL013078,AAEL019593,AAEL019605,AAEL022680,AAEL023188,	29.2	3.58	4.73	1.50159e-07	2.07991e-06	0.000153913
GO:0033108	mitochondrial respiratory chain complex assembly	14	9	AAEL000963,AAEL002019,AAEL002293,AAEL005171,AAEL008149,AAEL008811,AAEL011123,AAEL014201,AAEL021416,	64.3	7.89	20.49	2.09248e-07	2.85973e-06	0.000214479
GO:0006397	mRNA processing	88	23	AAEL000435,AAEL001363,AAEL001382,AAEL002818,AAEL003695,AAEL005719,AAEL006135,AAEL006401,AAEL006748,AAEL008719,AAEL009671,AAEL009914,AAEL011233,AAEL011433,AAEL013061,AAEL014169,AAEL015199,AAEL017161,AAEL017526,AAEL017543,AAEL021810,AAEL025258,AAEL027935,	26.1	3.21	4.07	3.51741e-07	4.74387e-06	0.000360534
GO:0034660	ncRNA metabolic process	151	32	AAEL001089,AAEL001200,AAEL001206,AAEL001400,AAEL001931,AAEL002048,AAEL002748,AAEL002766,AAEL002867,AAEL003336,AAEL003913,AAEL004571,AAEL004613,AAEL005037,AAEL005279,AAEL005728,AAEL005831,AAEL006577,AAEL006769,AAEL006938,AAEL007130,AAEL007934,AAEL008680,AAEL009156,AAEL010816,AAEL011655,AAEL012624,AAEL013521,AAEL014040,AAEL014099,AAEL021595,AAEL022886,	21.2	2.6	3.11	3.90709e-07	5.20099e-06	0.000400476
GO:0006486	protein glycosylation	64	19	AAEL000383,AAEL000444,AAEL002174,AAEL002183,AAEL002198,AAEL002804,AAEL002996,AAEL004228,AAEL009174,AAEL010227,AAEL010596,AAEL012034,AAEL012511,AAEL013071,AAEL013078,AAEL019593,AAEL019605,AAEL022680,AAEL023188,	29.7	3.64	4.84	4.31901e-07	5.60377e-06	0.000442698
GO:0043413	macromolecule glycosylation	64	19	AAEL000383,AAEL000444,AAEL002174,AAEL002183,AAEL002198,AAEL002804,AAEL002996,AAEL004228,AAEL009174,AAEL010227,AAEL010596,AAEL012034,AAEL012511,AAEL013071,AAEL013078,AAEL019593,AAEL019605,AAEL022680,AAEL023188,	29.7	3.64	4.84	4.31901e-07	5.60377e-06	0.000442698
GO:0009101	glycoprotein biosynthetic process	65	19	AAEL000383,AAEL000444,AAEL002174,AAEL002183,AAEL002198,AAEL002804,AAEL002996,AAEL004228,AAEL009174,AAEL010227,AAEL010596,AAEL012034,AAEL012511,AAEL013071,AAEL013078,AAEL019593,AAEL019605,AAEL022680,AAEL023188,	29.2	3.59	4.74	5.64309e-07	7.23021e-06	0.000578417
GO:0006396	RNA processing	233	42	AAEL000435,AAEL000674,AAEL000922,AAEL001089,AAEL001363,AAEL001382,AAEL001400,AAEL001619,AAEL001931,AAEL002818,AAEL003336,AAEL003695,AAEL004571,AAEL005279,AAEL005719,AAEL006135,AAEL006401,AAEL006748,AAEL007934,AAEL008175,AAEL008680,AAEL008719,AAEL009156,AAEL009671,AAEL009914,AAEL010453,AAEL011233,AAEL011433,AAEL012624,AAEL013061,AAEL013818,AAEL014040,AAEL014169,AAEL015199,AAEL017161,AAEL017526,AAE…	18	2.21	2.55	7.17354e-07	9.07763e-06	0.000735288
GO:0048193	Golgi vesicle transport	33	13	AAEL001516,AAEL001541,AAEL004977,AAEL005180,AAEL008135,AAEL008255,AAEL013121,AAEL013230,AAEL019420,AAEL022757,AAEL023407,AAEL024500,AAEL025078,	39.4	4.84	7.42	7.84774e-07	9.80967e-06	0.000804393
GO:0016071	mRNA metabolic process	113	26	AAEL000435,AAEL000922,AAEL001187,AAEL001363,AAEL001382,AAEL002818,AAEL003695,AAEL005719,AAEL006135,AAEL006401,AAEL006748,AAEL007854,AAEL008719,AAEL009671,AAEL009914,AAEL011233,AAEL011433,AAEL013061,AAEL014169,AAEL015199,AAEL017161,AAEL017526,AAEL017543,AAEL021810,AAEL025258,AAEL027935,	23	2.82	3.44	9.20957e-07	1.13733e-05	0.000943981
GO:0000377	RNA splicing, via transesterification reactions with bulged adenosine as nucleophile	45	15	AAEL001363,AAEL001382,AAEL003695,AAEL006135,AAEL006401,AAEL008719,AAEL009671,AAEL011233,AAEL011433,AAEL013061,AAEL015199,AAEL017161,AAEL017543,AAEL025258,AAEL027935,	33.3	4.09	5.72	1.38316e-06	1.64853e-05	0.00141774
GO:0000398	mRNA splicing, via spliceosome	45	15	AAEL001363,AAEL001382,AAEL003695,AAEL006135,AAEL006401,AAEL008719,AAEL009671,AAEL011233,AAEL011433,AAEL013061,AAEL015199,AAEL017161,AAEL017543,AAEL025258,AAEL027935,	33.3	4.09	5.72	1.38316e-06	1.64853e-05	0.00141774
GO:0000375	RNA splicing, via transesterification reactions	45	15	AAEL001363,AAEL001382,AAEL003695,AAEL006135,AAEL006401,AAEL008719,AAEL009671,AAEL011233,AAEL011433,AAEL013061,AAEL015199,AAEL017161,AAEL017543,AAEL025258,AAEL027935,	33.3	4.09	5.72	1.38316e-06	1.64853e-05	0.00141774
GO:0032543	mitochondrial translation	10	7	AAEL001974,AAEL002766,AAEL002993,AAEL009217,AAEL010042,AAEL021617,AAEL023209,	70	8.59	26.51	2.24444e-06	2.61426e-05	0.00230055
GO:0017004	cytochrome complex assembly	10	7	AAEL000963,AAEL002019,AAEL002293,AAEL008149,AAEL011123,AAEL021416,AAEL023511,	70	8.59	26.51	2.24444e-06	2.61426e-05	0.00230055
GO:0140053	mitochondrial gene expression	12	7	AAEL001974,AAEL002766,AAEL002993,AAEL009217,AAEL010042,AAEL021617,AAEL023209,	58.3	7.16	15.9	1.27986e-05	0.000147399	0.0131185
GO:0006082	organic acid metabolic process	210	36	AAEL001200,AAEL001206,AAEL001869,AAEL002048,AAEL002399,AAEL002748,AAEL002766,AAEL002867,AAEL003913,AAEL004297,AAEL004509,AAEL004613,AAEL005037,AAEL005728,AAEL005831,AAEL006577,AAEL006769,AAEL006938,AAEL007130,AAEL008366,AAEL008879,AAEL009387,AAEL010008,AAEL010816,AAEL010939,AAEL011655,AAEL012172,AAEL012318,AAEL012578,AAEL013521,AAEL013637,AAEL014099,AAEL022886,AAEL024717,AAEL026357,AAEL026984,	17.1	2.1	2.39	1.42343e-05	0.000162112	0.0145901
GO:0006465	signal peptide processing	6	5	AAEL000947,AAEL003418,AAEL004603,AAEL020485,AAEL026893,	83.3	10.23	56.69	1.98689e-05	0.000223798	0.0203657
GO:0019752	carboxylic acid metabolic process	207	35	AAEL001200,AAEL001206,AAEL001869,AAEL002048,AAEL002399,AAEL002748,AAEL002766,AAEL002867,AAEL003913,AAEL004297,AAEL004509,AAEL004613,AAEL005037,AAEL005728,AAEL005831,AAEL006577,AAEL006769,AAEL006938,AAEL007130,AAEL008366,AAEL008879,AAEL009387,AAEL010008,AAEL010816,AAEL010939,AAEL011655,AAEL012172,AAEL012318,AAEL012578,AAEL013521,AAEL013637,AAEL014099,AAEL022886,AAEL024717,AAEL026984,	16.9	2.08	2.35	2.52687e-05	0.000281526	0.0259004
GO:0043436	oxoacid metabolic process	208	35	AAEL001200,AAEL001206,AAEL001869,AAEL002048,AAEL002399,AAEL002748,AAEL002766,AAEL002867,AAEL003913,AAEL004297,AAEL004509,AAEL004613,AAEL005037,AAEL005728,AAEL005831,AAEL006577,AAEL006769,AAEL006938,AAEL007130,AAEL008366,AAEL008879,AAEL009387,AAEL010008,AAEL010816,AAEL010939,AAEL011655,AAEL012172,AAEL012318,AAEL012578,AAEL013521,AAEL013637,AAEL014099,AAEL022886,AAEL024717,AAEL026984,	16.8	2.07	2.33	2.80662e-05	0.000309332	0.0287679
GO:0043933	protein-containing complex subunit organization	219	36	AAEL000175,AAEL000963,AAEL001382,AAEL002019,AAEL002293,AAEL002334,AAEL003384,AAEL004347,AAEL004984,AAEL005171,AAEL006115,AAEL007945,AAEL008149,AAEL008719,AAEL008811,AAEL009981,AAEL010141,AAEL010339,AAEL010341,AAEL010809,AAEL011123,AAEL011233,AAEL011433,AAEL011748,AAEL012279,AAEL012661,AAEL013144,AAEL014201,AAEL014715,AAEL017543,AAEL019420,AAEL019791,AAEL021416,AAEL023347,AAEL023511,AAEL025877,	16.4	2.02	2.27	3.62929e-05	0.000395748	0.0372003
GO:0051234	establishment of localization	977	114	AAEL000077,AAEL000163,AAEL000417,AAEL000782,AAEL000902,AAEL000983,AAEL001177,AAEL001405,AAEL001516,AAEL001541,AAEL001596,AAEL001859,AAEL001968,AAEL002061,AAEL002349,AAEL002486,AAEL002523,AAEL002913,AAEL003318,AAEL003377,AAEL004335,AAEL004441,AAEL004523,AAEL004546,AAEL004743,AAEL004914,AAEL004977,AAEL005180,AAEL005217,AAEL005471,AAEL005635,AAEL005798,AAEL005856,AAEL006010,AAEL006050,AAEL006311,AAE…	11.7	1.43	1.56	3.74408e-05	0.000403966	0.0383768
GO:0070071	proton-transporting two-sector ATPase complex assembly	4	4	AAEL003384,AAEL010141,AAEL011748,AAEL025877,	100	12.28	inf	4.37724e-05	0.000467361	0.0448667
GO:0006888	endoplasmic reticulum to Golgi vesicle-mediated transport	14	7	AAEL001516,AAEL004977,AAEL008135,AAEL008255,AAEL019420,AAEL022757,AAEL025078,	50	6.14	11.36	4.79349e-05	0.000506528	0.0491333
GO:0051179	localization	996	115	AAEL000077,AAEL000163,AAEL000417,AAEL000782,AAEL000902,AAEL000983,AAEL001177,AAEL001405,AAEL001516,AAEL001541,AAEL001596,AAEL001859,AAEL001968,AAEL002061,AAEL002349,AAEL002486,AAEL002523,AAEL002913,AAEL003318,AAEL003377,AAEL004335,AAEL004441,AAEL004523,AAEL004546,AAEL004743,AAEL004914,AAEL004977,AAEL005180,AAEL005217,AAEL005471,AAEL005635,AAEL005798,AAEL005856,AAEL006010,AAEL006050,AAEL006311,AAE…	11.5	1.42	1.54	5.45988e-05	0.000571059	0.0559638
GO:0006810	transport	968	112	AAEL000077,AAEL000163,AAEL000417,AAEL000782,AAEL000902,AAEL000983,AAEL001177,AAEL001405,AAEL001516,AAEL001541,AAEL001596,AAEL001859,AAEL001968,AAEL002061,AAEL002349,AAEL002486,AAEL002523,AAEL002913,AAEL003318,AAEL003377,AAEL004335,AAEL004441,AAEL004523,AAEL004546,AAEL004743,AAEL004914,AAEL004977,AAEL005180,AAEL005217,AAEL005471,AAEL005635,AAEL005798,AAEL005856,AAEL006010,AAEL006050,AAEL006311,AAE…	11.6	1.42	1.54	6.31916e-05	0.000654256	0.0647714
GO:0071806	protein transmembrane transport	15	7	AAEL005471,AAEL007001,AAEL007987,AAEL012218,AAEL015275,AAEL025151,AAEL025660,	46.7	5.73	9.94	8.35695e-05	0.000856587	0.0856587
GO:0044281	small molecule metabolic process	400	54	AAEL000178,AAEL000240,AAEL000372,AAEL000444,AAEL001200,AAEL001206,AAEL001869,AAEL002048,AAEL002399,AAEL002748,AAEL002766,AAEL002867,AAEL003913,AAEL004050,AAEL004297,AAEL004509,AAEL004566,AAEL004613,AAEL005037,AAEL005728,AAEL005831,AAEL005976,AAEL006577,AAEL006769,AAEL006938,AAEL007130,AAEL008131,AAEL008341,AAEL008366,AAEL008593,AAEL008879,AAEL009387,AAEL009497,AAEL009647,AAEL010008,AAEL010816,AAE…	13.5	1.66	1.81	0.000144289	0.00146431	0.147896
GO:0065003	protein-containing complex assembly	208	33	AAEL000175,AAEL000963,AAEL001382,AAEL002019,AAEL002293,AAEL002334,AAEL003384,AAEL004347,AAEL004984,AAEL005171,AAEL006115,AAEL007945,AAEL008149,AAEL008719,AAEL008811,AAEL009981,AAEL010141,AAEL010809,AAEL011123,AAEL011233,AAEL011433,AAEL011748,AAEL012279,AAEL012661,AAEL013144,AAEL014201,AAEL014715,AAEL017543,AAEL019420,AAEL021416,AAEL023347,AAEL023511,AAEL025877,	15.9	1.95	2.17	0.000152659	0.00153407	0.156475
GO:0000387	spliceosomal snRNP assembly	8	5	AAEL001382,AAEL008719,AAEL011233,AAEL011433,AAEL017543,	62.5	7.67	18.89	0.000161309	0.00160526	0.165342
GO:0006891	intra-Golgi vesicle-mediated transport	5	4	AAEL001541,AAEL005180,AAEL008135,AAEL023407,	80	9.82	45.3	0.000204656	0.00201705	0.209773
GO:0034622	cellular protein-containing complex assembly	187	30	AAEL000175,AAEL000963,AAEL001382,AAEL002019,AAEL002293,AAEL002334,AAEL003384,AAEL004347,AAEL005171,AAEL006115,AAEL007945,AAEL008149,AAEL008719,AAEL008811,AAEL010141,AAEL010809,AAEL011123,AAEL011233,AAEL011433,AAEL011748,AAEL012279,AAEL012661,AAEL013144,AAEL014201,AAEL014715,AAEL017543,AAEL021416,AAEL023347,AAEL023511,AAEL025877,	16	1.97	2.19	0.000245943	0.00240087	0.252092
GO:0045454	cell redox homeostasis	40	11	AAEL000641,AAEL001432,AAEL002886,AAEL003206,AAEL008783,AAEL010065,AAEL018278,AAEL019408,AAEL023511,AAEL024679,AAEL024975,	27.5	3.38	4.32	0.000252097	0.00243773	0.2584
GO:0051604	protein maturation	29	9	AAEL000418,AAEL000947,AAEL003418,AAEL004603,AAEL006129,AAEL014946,AAEL020432,AAEL020485,AAEL026893,	31	3.81	5.11	0.000341399	0.00327041	0.349934
GO:1901137	carbohydrate derivative biosynthetic process	168	27	AAEL000383,AAEL000444,AAEL001869,AAEL002174,AAEL002183,AAEL002198,AAEL002804,AAEL002996,AAEL004228,AAEL004277,AAEL004297,AAEL008593,AAEL009174,AAEL009497,AAEL010227,AAEL010596,AAEL011700,AAEL012034,AAEL012172,AAEL012511,AAEL013071,AAEL013078,AAEL019593,AAEL019605,AAEL022680,AAEL023188,AAEL026486,	16.1	1.97	2.19	0.00047892	0.0045453	0.490893
GO:0065002	intracellular protein transmembrane transport	14	6	AAEL007001,AAEL007987,AAEL012218,AAEL015275,AAEL025151,AAEL025660,	42.9	5.26	8.51	0.000487732	0.00458647	0.499926
GO:0019725	cellular homeostasis	57	13	AAEL000641,AAEL001432,AAEL002886,AAEL003206,AAEL004335,AAEL008783,AAEL009387,AAEL010065,AAEL018278,AAEL019408,AAEL023511,AAEL024679,AAEL024975,	22.8	2.8	3.37	0.000533849	0.00484599	0.547195
GO:0017062	respiratory chain complex III assembly	3	3	AAEL002019,AAEL011123,AAEL021416,	100	12.28	inf	0.000538968	0.00484599	0.552443
GO:0070072	vacuolar proton-transporting V-type ATPase complex assembly	3	3	AAEL003384,AAEL011748,AAEL025877,	100	12.28	inf	0.000538968	0.00484599	0.552443
GO:0070070	proton-transporting V-type ATPase complex assembly	3	3	AAEL003384,AAEL011748,AAEL025877,	100	12.28	inf	0.000538968	0.00484599	0.552443
GO:0034551	mitochondrial respiratory chain complex III assembly	3	3	AAEL002019,AAEL011123,AAEL021416,	100	12.28	inf	0.000538968	0.00484599	0.552443
GO:0009063	cellular amino acid catabolic process	20	7	AAEL004509,AAEL008366,AAEL008879,AAEL010008,AAEL012318,AAEL013637,AAEL026984,	35	4.3	6.11	0.000700674	0.00624514	0.718191
GO:0008299	isoprenoid biosynthetic process	15	6	AAEL001740,AAEL004050,AAEL005201,AAEL006144,AAEL009647,AAEL022363,	40	4.91	7.56	0.000757174	0.00663336	0.776103
GO:0006720	isoprenoid metabolic process	15	6	AAEL001740,AAEL004050,AAEL005201,AAEL006144,AAEL009647,AAEL022363,	40	4.91	7.56	0.000757174	0.00663336	0.776103
GO:0008033	tRNA processing	54	12	AAEL001089,AAEL001400,AAEL001931,AAEL003336,AAEL004571,AAEL005279,AAEL007934,AAEL008680,AAEL009156,AAEL012624,AAEL014040,AAEL021595,	22.2	2.73	3.25	0.0011061	0.00960804	1
GO:0016485	protein processing	16	6	AAEL000947,AAEL003418,AAEL004603,AAEL014946,AAEL020485,AAEL026893,	37.5	4.6	6.8	0.00112859	0.00972102	1
GO:0022613	ribonucleoprotein complex biogenesis	93	17	AAEL000175,AAEL001382,AAEL002334,AAEL004347,AAEL006115,AAEL007431,AAEL007945,AAEL008719,AAEL009431,AAEL011233,AAEL011433,AAEL012279,AAEL012661,AAEL013144,AAEL014715,AAEL017543,AAEL023347,	18.3	2.24	2.55	0.0012335	0.0105361	1
GO:0008535	respiratory chain complex IV assembly	7	4	AAEL000963,AAEL002293,AAEL008149,AAEL023511,	57.1	7.01	15.1	0.0012534	0.0106177	1
GO:0016043	cellular component organization	553	65	AAEL000163,AAEL000175,AAEL000963,AAEL001382,AAEL002019,AAEL002293,AAEL002334,AAEL002539,AAEL002567,AAEL002851,AAEL002912,AAEL002948,AAEL003384,AAEL004347,AAEL004574,AAEL004984,AAEL005084,AAEL005171,AAEL005217,AAEL005827,AAEL006115,AAEL006463,AAEL006642,AAEL007001,AAEL007945,AAEL008149,AAEL008718,AAEL008719,AAEL008811,AAEL009068,AAEL009883,AAEL009981,AAEL010141,AAEL010339,AAEL010341,AAEL010809,AAE…	11.8	1.44	1.54	0.0015532	0.0130495	1
GO:0070585	protein localization to mitochondrion	12	5	AAEL000163,AAEL007001,AAEL012218,AAEL015275,AAEL025660,	41.7	5.11	8.09	0.00172932	0.0138481	1
GO:0097502	mannosylation	12	5	AAEL000559,AAEL002483,AAEL010227,AAEL012034,AAEL013078,	41.7	5.11	8.09	0.00172932	0.0138481	1
GO:0006626	protein targeting to mitochondrion	12	5	AAEL000163,AAEL007001,AAEL012218,AAEL015275,AAEL025660,	41.7	5.11	8.09	0.00172932	0.0138481	1
GO:0006487	protein N-linked glycosylation	12	5	AAEL002174,AAEL012511,AAEL013078,AAEL019593,AAEL023188,	41.7	5.11	8.09	0.00172932	0.0138481	1
GO:0006367	transcription initiation from RNA polymerase II promoter	12	5	AAEL003945,AAEL011462,AAEL013998,AAEL023506,AAEL027973,	41.7	5.11	8.09	0.00172932	0.0138481	1
GO:0072655	establishment of protein localization to mitochondrion	12	5	AAEL000163,AAEL007001,AAEL012218,AAEL015275,AAEL025660,	41.7	5.11	8.09	0.00172932	0.0138481	1
GO:0006434	seryl-tRNA aminoacylation	4	3	AAEL005037,AAEL005831,AAEL006938,	75	9.21	33.94	0.00202456	0.0159629	1
GO:0009083	branched-chain amino acid catabolic process	4	3	AAEL008366,AAEL010008,AAEL026984,	75	9.21	33.94	0.00202456	0.0159629	1
GO:0022607	cellular component assembly	269	36	AAEL000175,AAEL000963,AAEL001382,AAEL002019,AAEL002293,AAEL002334,AAEL002539,AAEL002912,AAEL002948,AAEL003384,AAEL004347,AAEL004984,AAEL005171,AAEL006115,AAEL007945,AAEL008149,AAEL008719,AAEL008811,AAEL009981,AAEL010141,AAEL010809,AAEL011123,AAEL011233,AAEL011433,AAEL011748,AAEL012279,AAEL012661,AAEL013144,AAEL014201,AAEL014715,AAEL017543,AAEL019420,AAEL021416,AAEL023347,AAEL023511,AAEL025877,	13.4	1.64	1.77	0.00206809	0.0161817	1
GO:1901606	alpha-amino acid catabolic process	18	6	AAEL004509,AAEL008879,AAEL010008,AAEL012318,AAEL013637,AAEL026984,	33.3	4.09	5.67	0.00227135	0.0176374	1
GO:0009225	nucleotide-sugar metabolic process	8	4	AAEL000444,AAEL008593,AAEL009497,AAEL014961,	50	6.14	11.32	0.00234549	0.0179413	1
GO:0030150	protein import into mitochondrial matrix	8	4	AAEL007001,AAEL012218,AAEL015275,AAEL025660,	50	6.14	11.32	0.00234549	0.0179413	1
GO:0042592	homeostatic process	67	13	AAEL000641,AAEL001432,AAEL002886,AAEL003206,AAEL004335,AAEL008783,AAEL009387,AAEL010065,AAEL018278,AAEL019408,AAEL023511,AAEL024679,AAEL024975,	19.4	2.38	2.74	0.00259162	0.0196771	1
GO:0044282	small molecule catabolic process	45	10	AAEL000372,AAEL004509,AAEL004566,AAEL008366,AAEL008879,AAEL010008,AAEL012318,AAEL013637,AAEL020850,AAEL026984,	22.2	2.73	3.25	0.00281815	0.0212397	1
GO:0051028	mRNA transport	14	5	AAEL006050,AAEL006748,AAEL010355,AAEL025547,AAEL025772,	35.7	4.38	6.29	0.00380945	0.0285014	1
GO:0015931	nucleobase-containing compound transport	26	7	AAEL002349,AAEL006050,AAEL006748,AAEL010355,AAEL018326,AAEL025547,AAEL025772,	26.9	3.3	4.18	0.00386176	0.0286834	1
GO:0033617	mitochondrial cytochrome c oxidase assembly	5	3	AAEL000963,AAEL002293,AAEL008149,	60	7.37	16.97	0.00475441	0.0343188	1
GO:0010257	NADH dehydrogenase complex assembly	5	3	AAEL005171,AAEL008811,AAEL014201,	60	7.37	16.97	0.00475441	0.0343188	1
GO:0032981	mitochondrial respiratory chain complex I assembly	5	3	AAEL005171,AAEL008811,AAEL014201,	60	7.37	16.97	0.00475441	0.0343188	1
GO:0006890	retrograde vesicle-mediated transport, Golgi to endoplasmic reticulum	5	3	AAEL013121,AAEL013230,AAEL024500,	60	7.37	16.97	0.00475441	0.0343188	1
GO:0016054	organic acid catabolic process	27	7	AAEL004509,AAEL008366,AAEL008879,AAEL010008,AAEL012318,AAEL013637,AAEL026984,	25.9	3.18	3.97	0.00485343	0.034547	1
GO:0046395	carboxylic acid catabolic process	27	7	AAEL004509,AAEL008366,AAEL008879,AAEL010008,AAEL012318,AAEL013637,AAEL026984,	25.9	3.18	3.97	0.00485343	0.034547	1
GO:1901575	organic substance catabolic process	254	33	AAEL000116,AAEL000372,AAEL000922,AAEL001187,AAEL002077,AAEL002567,AAEL002645,AAEL003907,AAEL004509,AAEL004566,AAEL004697,AAEL004933,AAEL006677,AAEL006799,AAEL007030,AAEL007092,AAEL007854,AAEL008366,AAEL008879,AAEL009387,AAEL009671,AAEL010008,AAEL010966,AAEL012318,AAEL013061,AAEL013637,AAEL013825,AAEL013979,AAEL014640,AAEL018212,AAEL020850,AAEL022689,AAEL026984,	13	1.59	1.71	0.00494228	0.0349368	1
GO:0071840	cellular component organization or biogenesis	607	67	AAEL000163,AAEL000175,AAEL000963,AAEL001382,AAEL002019,AAEL002293,AAEL002334,AAEL002539,AAEL002567,AAEL002851,AAEL002912,AAEL002948,AAEL003384,AAEL004347,AAEL004574,AAEL004984,AAEL005084,AAEL005171,AAEL005217,AAEL005827,AAEL006115,AAEL006463,AAEL006642,AAEL007001,AAEL007431,AAEL007945,AAEL008149,AAEL008718,AAEL008719,AAEL008811,AAEL009068,AAEL009431,AAEL009883,AAEL009981,AAEL010141,AAEL010339,AAE…	11	1.35	1.43	0.00607354	0.0426396	1
GO:0008612	peptidyl-lysine modification to peptidyl-hypusine	2	2	AAEL006129,AAEL020432,	100	12.28	inf	0.00662955	0.0430082	1
GO:1904263	positive regulation of TORC1 signaling	2	2	AAEL006311,AAEL025078,	100	12.28	inf	0.00662955	0.0430082	1
GO:0045116	protein neddylation	2	2	AAEL007738,AAEL012306,	100	12.28	inf	0.00662955	0.0430082	1
GO:0006421	asparaginyl-tRNA aminoacylation	2	2	AAEL006577,AAEL011655,	100	12.28	inf	0.00662955	0.0430082	1
GO:0006784	heme A biosynthetic process	2	2	AAEL012426,AAEL022629,	100	12.28	inf	0.00662955	0.0430082	1
GO:0070525	tRNA threonylcarbamoyladenosine metabolic process	2	2	AAEL001931,AAEL004571,	100	12.28	inf	0.00662955	0.0430082	1
GO:1903432	regulation of TORC1 signaling	2	2	AAEL006311,AAEL025078,	100	12.28	inf	0.00662955	0.0430082	1
GO:0006620	posttranslational protein targeting to endoplasmic reticulum membrane	2	2	AAEL007987,AAEL025151,	100	12.28	inf	0.00662955	0.0430082	1
GO:0006436	tryptophanyl-tRNA aminoacylation	2	2	AAEL006769,AAEL013521,	100	12.28	inf	0.00662955	0.0430082	1
GO:0002949	tRNA threonylcarbamoyladenosine modification	2	2	AAEL001931,AAEL004571,	100	12.28	inf	0.00662955	0.0430082	1
GO:0031204	posttranslational protein targeting to membrane, translocation	2	2	AAEL007987,AAEL025151,	100	12.28	inf	0.00662955	0.0430082	1
GO:0046160	heme a metabolic process	2	2	AAEL012426,AAEL022629,	100	12.28	inf	0.00662955	0.0430082	1
GO:0006839	mitochondrial transport	16	5	AAEL000163,AAEL007001,AAEL012218,AAEL015275,AAEL025660,	31.3	3.84	5.15	0.00724786	0.0458251	1
GO:0051236	establishment of RNA localization	16	5	AAEL006050,AAEL006748,AAEL010355,AAEL025547,AAEL025772,	31.3	3.84	5.15	0.00724786	0.0458251	1
GO:0050658	RNA transport	16	5	AAEL006050,AAEL006748,AAEL010355,AAEL025547,AAEL025772,	31.3	3.84	5.15	0.00724786	0.0458251	1
GO:0050657	nucleic acid transport	16	5	AAEL006050,AAEL006748,AAEL010355,AAEL025547,AAEL025772,	31.3	3.84	5.15	0.00724786	0.0458251	1
GO:0006400	tRNA modification	36	8	AAEL001931,AAEL004571,AAEL005279,AAEL008680,AAEL009156,AAEL012624,AAEL014040,AAEL021595,	22.2	2.73	3.24	0.0072873	0.0458251	1
GO:0071545	inositol phosphate catabolic process	6	3	AAEL000372,AAEL004566,AAEL020850,	50	6.14	11.31	0.00893458	0.054838	1
GO:0046855	inositol phosphate dephosphorylation	6	3	AAEL000372,AAEL004566,AAEL020850,	50	6.14	11.31	0.00893458	0.054838	1
GO:0009081	branched-chain amino acid metabolic process	6	3	AAEL008366,AAEL010008,AAEL026984,	50	6.14	11.31	0.00893458	0.054838	1
GO:0046838	phosphorylated carbohydrate dephosphorylation	6	3	AAEL000372,AAEL004566,AAEL020850,	50	6.14	11.31	0.00893458	0.054838	1
GO:0044743	protein transmembrane import into intracellular organelle	11	4	AAEL007001,AAEL012218,AAEL015275,AAEL025660,	36.4	4.46	6.47	0.0090684	0.055328	1
GO:0006403	RNA localization	17	5	AAEL006050,AAEL006748,AAEL010355,AAEL025547,AAEL025772,	29.4	3.61	4.72	0.0095907	0.0581685	1
GO:0009451	RNA modification	71	12	AAEL000674,AAEL001931,AAEL004571,AAEL005279,AAEL007431,AAEL008680,AAEL009156,AAEL011303,AAEL012624,AAEL014040,AAEL021595,AAEL021810,	16.9	2.07	2.31	0.0115353	0.0695511	1
GO:1901605	alpha-amino acid metabolic process	56	10	AAEL001869,AAEL004509,AAEL008879,AAEL010008,AAEL012172,AAEL012318,AAEL012578,AAEL013637,AAEL024717,AAEL026984,	17.9	2.19	2.47	0.0139743	0.0837642	1
GO:0044085	cellular component biogenesis	324	38	AAEL000175,AAEL000963,AAEL001382,AAEL002019,AAEL002293,AAEL002334,AAEL002539,AAEL002912,AAEL002948,AAEL003384,AAEL004347,AAEL004984,AAEL005171,AAEL006115,AAEL007431,AAEL007945,AAEL008149,AAEL008719,AAEL008811,AAEL009431,AAEL009981,AAEL010141,AAEL010809,AAEL011123,AAEL011233,AAEL011433,AAEL011748,AAEL012279,AAEL012661,AAEL013144,AAEL014201,AAEL014715,AAEL017543,AAEL019420,AAEL021416,AAEL023347,AAE…	11.7	1.44	1.52	0.0141394	0.0842611	1
GO:0009074	aromatic amino acid family catabolic process	7	3	AAEL004509,AAEL008879,AAEL013637,	42.9	5.26	8.48	0.0146955	0.0859504	1
GO:0046174	polyol catabolic process	7	3	AAEL000372,AAEL004566,AAEL020850,	42.9	5.26	8.48	0.0146955	0.0859504	1
GO:0046164	alcohol catabolic process	7	3	AAEL000372,AAEL004566,AAEL020850,	42.9	5.26	8.48	0.0146955	0.0859504	1
GO:0044265	cellular macromolecule catabolic process	118	17	AAEL000116,AAEL000922,AAEL001187,AAEL002077,AAEL002567,AAEL002645,AAEL003907,AAEL004697,AAEL006677,AAEL006799,AAEL007854,AAEL009671,AAEL010966,AAEL013061,AAEL013825,AAEL018212,AAEL022689,	14.4	1.77	1.92	0.0147583	0.0859504	1
GO:0006401	RNA catabolic process	33	7	AAEL000922,AAEL001187,AAEL006799,AAEL007854,AAEL009671,AAEL013061,AAEL013825,	21.2	2.6	3.05	0.0152362	0.0882325	1
GO:0043161	proteasome-mediated ubiquitin-dependent protein catabolic process	19	5	AAEL000116,AAEL002077,AAEL002645,AAEL004697,AAEL006677,	26.3	3.23	4.04	0.0157316	0.0900831	1
GO:0010498	proteasomal protein catabolic process	19	5	AAEL000116,AAEL002077,AAEL002645,AAEL004697,AAEL006677,	26.3	3.23	4.04	0.0157316	0.0900831	1
GO:0006366	transcription by RNA polymerase II	26	6	AAEL000677,AAEL003945,AAEL011462,AAEL013998,AAEL023506,AAEL027973,	23.1	2.83	3.4	0.0160875	0.0916094	1
GO:0009056	catabolic process	276	33	AAEL000116,AAEL000372,AAEL000922,AAEL001187,AAEL002077,AAEL002567,AAEL002645,AAEL003907,AAEL004509,AAEL004566,AAEL004697,AAEL004933,AAEL006677,AAEL006799,AAEL007030,AAEL007092,AAEL007854,AAEL008366,AAEL008879,AAEL009387,AAEL009671,AAEL010008,AAEL010966,AAEL012318,AAEL013061,AAEL013637,AAEL013825,AAEL013979,AAEL014640,AAEL018212,AAEL020850,AAEL022689,AAEL026984,	12	1.47	1.55	0.016386	0.0927934	1
GO:0042180	cellular ketone metabolic process	13	4	AAEL000178,AAEL000240,AAEL004509,AAEL022363,	30.8	3.78	5.03	0.0172334	0.0970563	1
GO:0006568	tryptophan metabolic process	3	2	AAEL004509,AAEL008879,	66.7	8.18	22.6	0.0188107	0.097873	1
GO:0090114	COPII-coated vesicle budding	3	2	AAEL019420,AAEL025078,	66.7	8.18	22.6	0.0188107	0.097873	1
GO:0042436	indole-containing compound catabolic process	3	2	AAEL004509,AAEL008879,	66.7	8.18	22.6	0.0188107	0.097873	1
GO:0042886	amide transport	3	2	AAEL002349,AAEL003318,	66.7	8.18	22.6	0.0188107	0.097873	1
GO:0000266	mitochondrial fission	3	2	AAEL008718,AAEL009068,	66.7	8.18	22.6	0.0188107	0.097873	1
GO:0046037	GMP metabolic process	3	2	AAEL001869,AAEL011006,	66.7	8.18	22.6	0.0188107	0.097873	1
GO:0006586	indolalkylamine metabolic process	3	2	AAEL004509,AAEL008879,	66.7	8.18	22.6	0.0188107	0.097873	1
GO:0070084	protein initiator methionine removal	3	2	AAEL004738,AAEL013150,	66.7	8.18	22.6	0.0188107	0.097873	1
GO:0046218	indolalkylamine catabolic process	3	2	AAEL004509,AAEL008879,	66.7	8.18	22.6	0.0188107	0.097873	1
GO:0032786	positive regulation of DNA-templated transcription, elongation	3	2	AAEL003945,AAEL006566,	66.7	8.18	22.6	0.0188107	0.097873	1
GO:0019673	GDP-mannose metabolic process	3	2	AAEL009497,AAEL014961,	66.7	8.18	22.6	0.0188107	0.097873	1
GO:0006900	vesicle budding from membrane	3	2	AAEL019420,AAEL025078,	66.7	8.18	22.6	0.0188107	0.097873	1
GO:0006569	tryptophan catabolic process	3	2	AAEL004509,AAEL008879,	66.7	8.18	22.6	0.0188107	0.097873	1
GO:0045185	maintenance of protein location	3	2	AAEL008434,AAEL008543,	66.7	8.18	22.6	0.0188107	0.097873	1
GO:0006574	valine catabolic process	3	2	AAEL010008,AAEL026984,	66.7	8.18	22.6	0.0188107	0.097873	1
GO:0009167	purine ribonucleoside monophosphate metabolic process	20	5	AAEL001869,AAEL005798,AAEL008787,AAEL011006,AAEL022056,	25	3.07	3.77	0.0196024	0.101477	1
GO:0043412	macromolecule modification	742	76	AAEL000116,AAEL000383,AAEL000444,AAEL000674,AAEL000852,AAEL001038,AAEL001333,AAEL001622,AAEL001931,AAEL002174,AAEL002183,AAEL002198,AAEL002645,AAEL002804,AAEL002996,AAEL003907,AAEL004228,AAEL004277,AAEL004571,AAEL004574,AAEL004697,AAEL004738,AAEL004779,AAEL005080,AAEL005191,AAEL005279,AAEL005690,AAEL006129,AAEL006221,AAEL007171,AAEL007431,AAEL007738,AAEL008680,AAEL009156,AAEL009174,AAEL009374,AAE…	10.2	1.26	1.31	0.0206245	0.106232	1
GO:0006743	ubiquinone metabolic process	8	3	AAEL000178,AAEL000240,AAEL022363,	37.5	4.6	6.78	0.0221055	0.111069	1
GO:1901616	organic hydroxy compound catabolic process	8	3	AAEL000372,AAEL004566,AAEL020850,	37.5	4.6	6.78	0.0221055	0.111069	1
GO:0042181	ketone biosynthetic process	8	3	AAEL000178,AAEL000240,AAEL022363,	37.5	4.6	6.78	0.0221055	0.111069	1
GO:1901663	quinone biosynthetic process	8	3	AAEL000178,AAEL000240,AAEL022363,	37.5	4.6	6.78	0.0221055	0.111069	1
GO:0006744	ubiquinone biosynthetic process	8	3	AAEL000178,AAEL000240,AAEL022363,	37.5	4.6	6.78	0.0221055	0.111069	1
GO:0046128	purine ribonucleoside metabolic process	14	4	AAEL005798,AAEL008787,AAEL012172,AAEL022056,	28.6	3.51	4.53	0.022603	0.113015	1
GO:0000413	protein peptidyl-prolyl isomerization	28	6	AAEL000852,AAEL004779,AAEL005690,AAEL009911,AAEL010491,AAEL020244,	21.4	2.63	3.09	0.0229169	0.114028	1
GO:0009057	macromolecule catabolic process	134	18	AAEL000116,AAEL000922,AAEL001187,AAEL002077,AAEL002567,AAEL002645,AAEL003907,AAEL004697,AAEL006677,AAEL006799,AAEL007854,AAEL009671,AAEL010966,AAEL013061,AAEL013825,AAEL014640,AAEL018212,AAEL022689,	13.4	1.65	1.76	0.0239132	0.118411	1
GO:0090305	nucleic acid phosphodiester bond hydrolysis	70	11	AAEL000293,AAEL001089,AAEL001400,AAEL007854,AAEL008175,AAEL008865,AAEL009589,AAEL011560,AAEL017101,AAEL022595,AAEL025232,	15.7	1.93	2.12	0.0252434	0.124396	1
GO:1901565	organonitrogen compound catabolic process	146	19	AAEL000116,AAEL002077,AAEL002567,AAEL002645,AAEL003907,AAEL004509,AAEL004697,AAEL006677,AAEL007030,AAEL008366,AAEL008879,AAEL010008,AAEL010966,AAEL012318,AAEL013637,AAEL014640,AAEL018212,AAEL022689,AAEL026984,	13	1.6	1.7	0.0278679	0.136673	1
GO:1990542	mitochondrial transmembrane transport	15	4	AAEL007001,AAEL012218,AAEL015275,AAEL025660,	26.7	3.27	4.11	0.028882	0.140972	1
GO:0006490	oligosaccharide-lipid intermediate biosynthetic process	9	3	AAEL002996,AAEL013078,AAEL019593,	33.3	4.09	5.65	0.0311827	0.149356	1
GO:0007031	peroxisome organization	9	3	AAEL006463,AAEL009068,AAEL011781,	33.3	4.09	5.65	0.0311827	0.149356	1
GO:1901661	quinone metabolic process	9	3	AAEL000178,AAEL000240,AAEL022363,	33.3	4.09	5.65	0.0311827	0.149356	1
GO:0006406	mRNA export from nucleus	9	3	AAEL006050,AAEL010355,AAEL025772,	33.3	4.09	5.65	0.0311827	0.149356	1
GO:0042537	benzene-containing compound metabolic process	4	2	AAEL004509,AAEL008879,	50	6.14	11.3	0.0355969	0.165099	1
GO:0043486	histone exchange	4	2	AAEL010341,AAEL019791,	50	6.14	11.3	0.0355969	0.165099	1
GO:0009310	amine catabolic process	4	2	AAEL004509,AAEL008879,	50	6.14	11.3	0.0355969	0.165099	1
GO:0042430	indole-containing compound metabolic process	4	2	AAEL004509,AAEL008879,	50	6.14	11.3	0.0355969	0.165099	1
GO:0006573	valine metabolic process	4	2	AAEL010008,AAEL026984,	50	6.14	11.3	0.0355969	0.165099	1
GO:0016050	vesicle organization	4	2	AAEL019420,AAEL025078,	50	6.14	11.3	0.0355969	0.165099	1
GO:0042402	cellular biogenic amine catabolic process	4	2	AAEL004509,AAEL008879,	50	6.14	11.3	0.0355969	0.165099	1
GO:1902600	proton transmembrane transport	56	9	AAEL005798,AAEL006390,AAEL007777,AAEL008787,AAEL011025,AAEL012819,AAEL021342,AAEL022056,AAEL022497,	16.1	1.97	2.17	0.0358786	0.165656	1
GO:0018208	peptidyl-proline modification	31	6	AAEL000852,AAEL004779,AAEL005690,AAEL009911,AAEL010491,AAEL020244,	19.4	2.38	2.72	0.0364187	0.166648	1
GO:0061024	membrane organization	31	6	AAEL000163,AAEL005217,AAEL008718,AAEL011136,AAEL019420,AAEL025078,	19.4	2.38	2.72	0.0364187	0.166648	1
GO:0044248	cellular catabolic process	212	25	AAEL000116,AAEL000922,AAEL001187,AAEL002077,AAEL002567,AAEL002645,AAEL003907,AAEL004509,AAEL004697,AAEL006677,AAEL006799,AAEL007030,AAEL007854,AAEL008366,AAEL008879,AAEL009671,AAEL010008,AAEL010966,AAEL012318,AAEL013061,AAEL013637,AAEL013825,AAEL018212,AAEL022689,AAEL026984,	11.8	1.45	1.52	0.0386167	0.175921	1
GO:1901361	organic cyclic compound catabolic process	66	10	AAEL000922,AAEL001187,AAEL004509,AAEL006799,AAEL007854,AAEL008879,AAEL009671,AAEL013061,AAEL013637,AAEL013825,	15.2	1.86	2.02	0.0399392	0.180342	1
GO:0019439	aromatic compound catabolic process	66	10	AAEL000922,AAEL001187,AAEL004509,AAEL006799,AAEL007854,AAEL008879,AAEL009671,AAEL013061,AAEL013637,AAEL013825,	15.2	1.86	2.02	0.0399392	0.180342	1
GO:0006405	RNA export from nucleus	10	3	AAEL006050,AAEL010355,AAEL025772,	30	3.68	4.85	0.041905	0.185942	1
GO:0006383	transcription by RNA polymerase III	10	3	AAEL000677,AAEL009202,AAEL022363,	30	3.68	4.85	0.041905	0.185942	1
GO:0043647	inositol phosphate metabolic process	10	3	AAEL000372,AAEL004566,AAEL020850,	30	3.68	4.85	0.041905	0.185942	1
GO:0032006	regulation of TOR signaling	10	3	AAEL001124,AAEL006311,AAEL025078,	30	3.68	4.85	0.041905	0.185942	1
GO:1901135	carbohydrate derivative metabolic process	333	36	AAEL000383,AAEL000444,AAEL001869,AAEL002174,AAEL002183,AAEL002198,AAEL002467,AAEL002645,AAEL002804,AAEL002996,AAEL004050,AAEL004228,AAEL004277,AAEL004297,AAEL005976,AAEL008593,AAEL009174,AAEL009387,AAEL009497,AAEL010227,AAEL010596,AAEL011006,AAEL011700,AAEL012034,AAEL012172,AAEL012394,AAEL012511,AAEL013071,AAEL013078,AAEL014640,AAEL014961,AAEL019593,AAEL019605,AAEL022680,AAEL023188,AAEL026486,	10.8	1.33	1.38	0.0484845	0.21421	1

## Sheet: 6hp_MF
ID	Name	Bgd count	Result count	Result gene list	Pct of bgd	Fold enrichment	Odds ratio	P-value	Benjamini	Bonferroni
GO:0003723	RNA binding	411	97	AAEL000175,AAEL000185,AAEL000922,AAEL000951,AAEL001177,AAEL001326,AAEL001352,AAEL001363,AAEL001412,AAEL001421,AAEL001619,AAEL001916,AAEL002334,AAEL002377,AAEL002818,AAEL002867,AAEL002980,AAEL003377,AAEL003801,AAEL003945,AAEL004010,AAEL004034,AAEL004291,AAEL004347,AAEL004613,AAEL004914,AAEL005358,AAEL005690,AAEL005796,AAEL005825,AAEL005947,AAEL006048,AAEL006050,AAEL006115,AAEL006135,AAEL006473,AAE…	23.6	2.9	3.78	1.02523e-22	5.78231e-20	5.78231e-20
GO:0003735	structural constituent of ribosome	143	47	AAEL000180,AAEL000210,AAEL000297,AAEL000467,AAEL000701,AAEL001439,AAEL001615,AAEL001909,AAEL001943,AAEL002418,AAEL002783,AAEL002993,AAEL003397,AAEL003409,AAEL003704,AAEL003801,AAEL004034,AAEL004306,AAEL004430,AAEL004433,AAEL005150,AAEL005162,AAEL005413,AAEL005598,AAEL005944,AAEL006117,AAEL007355,AAEL008044,AAEL008582,AAEL009217,AAEL009608,AAEL009833,AAEL010181,AAEL011390,AAEL011391,AAEL011814,AAE…	32.9	4.03	5.77	1.60451e-17	4.52471e-15	9.04942e-15
GO:0008135	translation factor activity, RNA binding	65	26	AAEL000175,AAEL000185,AAEL000951,AAEL001916,AAEL002334,AAEL003945,AAEL004347,AAEL005796,AAEL005825,AAEL006115,AAEL007945,AAEL008517,AAEL010339,AAEL011288,AAEL011527,AAEL012279,AAEL012661,AAEL013144,AAEL013675,AAEL014262,AAEL014715,AAEL020525,AAEL023028,AAEL023347,AAEL024775,AAEL025258,	40	4.91	7.71	1.57273e-12	2.70397e-10	8.87018e-10
GO:0003743	translation initiation factor activity	43	21	AAEL000175,AAEL000185,AAEL001916,AAEL002334,AAEL003945,AAEL004347,AAEL005796,AAEL005825,AAEL006115,AAEL007945,AAEL011527,AAEL012279,AAEL012661,AAEL013144,AAEL013675,AAEL014262,AAEL014715,AAEL020525,AAEL023028,AAEL023347,AAEL024775,	48.8	5.99	11	2.01074e-12	2.70397e-10	1.13406e-09
GO:0090079	translation regulator activity, nucleic acid binding	66	26	AAEL000175,AAEL000185,AAEL000951,AAEL001916,AAEL002334,AAEL003945,AAEL004347,AAEL005796,AAEL005825,AAEL006115,AAEL007945,AAEL008517,AAEL010339,AAEL011288,AAEL011527,AAEL012279,AAEL012661,AAEL013144,AAEL013675,AAEL014262,AAEL014715,AAEL020525,AAEL023028,AAEL023347,AAEL024775,AAEL025258,	39.4	4.84	7.52	2.39714e-12	2.70397e-10	1.35199e-09
GO:0140098	catalytic activity, acting on RNA	169	43	AAEL000293,AAEL000674,AAEL001089,AAEL001200,AAEL001206,AAEL001400,AAEL002048,AAEL002748,AAEL002766,AAEL002867,AAEL003336,AAEL003401,AAEL003552,AAEL003913,AAEL004613,AAEL005037,AAEL005279,AAEL005728,AAEL005831,AAEL006066,AAEL006577,AAEL006769,AAEL006938,AAEL007130,AAEL008175,AAEL008755,AAEL008865,AAEL009156,AAEL009202,AAEL010816,AAEL011087,AAEL011655,AAEL013521,AAEL013825,AAEL014099,AAEL014153,AAE…	25.4	3.12	3.99	7.8874e-12	7.41415e-10	4.44849e-09
GO:0045182	translation regulator activity	70	26	AAEL000175,AAEL000185,AAEL000951,AAEL001916,AAEL002334,AAEL003945,AAEL004347,AAEL005796,AAEL005825,AAEL006115,AAEL007945,AAEL008517,AAEL010339,AAEL011288,AAEL011527,AAEL012279,AAEL012661,AAEL013144,AAEL013675,AAEL014262,AAEL014715,AAEL020525,AAEL023028,AAEL023347,AAEL024775,AAEL025258,	37.1	4.56	6.83	1.179e-11	9.49935e-10	6.64954e-09
GO:0004812	aminoacyl-tRNA ligase activity	44	19	AAEL001200,AAEL001206,AAEL002048,AAEL002748,AAEL002867,AAEL003913,AAEL004613,AAEL005037,AAEL005728,AAEL005831,AAEL006577,AAEL006769,AAEL006938,AAEL007130,AAEL010816,AAEL011655,AAEL013521,AAEL014099,AAEL022886,	43.2	5.3	8.73	3.35429e-10	2.10202e-08	1.89182e-07
GO:0016875	ligase activity, forming carbon-oxygen bonds	44	19	AAEL001200,AAEL001206,AAEL002048,AAEL002748,AAEL002867,AAEL003913,AAEL004613,AAEL005037,AAEL005728,AAEL005831,AAEL006577,AAEL006769,AAEL006938,AAEL007130,AAEL010816,AAEL011655,AAEL013521,AAEL014099,AAEL022886,	43.2	5.3	8.73	3.35429e-10	2.10202e-08	1.89182e-07
GO:0140101	catalytic activity, acting on a tRNA	72	24	AAEL001200,AAEL001206,AAEL002048,AAEL002748,AAEL002766,AAEL002867,AAEL003913,AAEL004613,AAEL005037,AAEL005279,AAEL005728,AAEL005831,AAEL006066,AAEL006577,AAEL006769,AAEL006938,AAEL007130,AAEL009156,AAEL010816,AAEL011655,AAEL013521,AAEL014099,AAEL014153,AAEL022886,	33.3	4.09	5.76	9.74068e-10	5.49375e-08	5.49375e-07
GO:0051082	unfolded protein binding	28	14	AAEL000301,AAEL000486,AAEL001005,AAEL001103,AAEL001715,AAEL001838,AAEL002337,AAEL003180,AAEL007650,AAEL009320,AAEL010063,AAEL012507,AAEL015100,AAEL026676,	50	6.14	11.44	6.97715e-09	3.57738e-07	3.93511e-06
GO:0016874	ligase activity	111	28	AAEL001200,AAEL001206,AAEL001869,AAEL002048,AAEL002748,AAEL002766,AAEL002867,AAEL003336,AAEL003913,AAEL004076,AAEL004613,AAEL005037,AAEL005728,AAEL005831,AAEL006577,AAEL006769,AAEL006938,AAEL007130,AAEL007738,AAEL007777,AAEL010296,AAEL010816,AAEL011655,AAEL012306,AAEL013521,AAEL013967,AAEL014099,AAEL022886,	25.2	3.1	3.89	4.39074e-08	2.06365e-06	2.47638e-05
GO:0017076	purine nucleotide binding	942	122	AAEL000081,AAEL000301,AAEL000486,AAEL000583,AAEL000836,AAEL001038,AAEL001052,AAEL001200,AAEL001206,AAEL001411,AAEL001622,AAEL001673,AAEL001715,AAEL001869,AAEL001901,AAEL002048,AAEL002061,AAEL002488,AAEL002748,AAEL002766,AAEL002851,AAEL002867,AAEL002913,AAEL003103,AAEL003109,AAEL003170,AAEL003336,AAEL003383,AAEL003913,AAEL003926,AAEL004050,AAEL004076,AAEL004297,AAEL004438,AAEL004613,AAEL004740,AAE…	13	1.59	1.78	8.66634e-08	3.75986e-06	4.88782e-05
GO:0032555	purine ribonucleotide binding	940	121	AAEL000081,AAEL000301,AAEL000486,AAEL000583,AAEL000836,AAEL001038,AAEL001052,AAEL001200,AAEL001206,AAEL001411,AAEL001622,AAEL001673,AAEL001715,AAEL001869,AAEL001901,AAEL002048,AAEL002061,AAEL002488,AAEL002748,AAEL002766,AAEL002851,AAEL002867,AAEL002913,AAEL003103,AAEL003109,AAEL003170,AAEL003336,AAEL003383,AAEL003913,AAEL003926,AAEL004050,AAEL004076,AAEL004297,AAEL004613,AAEL004740,AAEL004743,AAE…	12.9	1.58	1.77	1.38788e-07	5.59116e-06	7.82762e-05
GO:0140640	catalytic activity, acting on a nucleic acid	286	50	AAEL000293,AAEL000674,AAEL001089,AAEL001200,AAEL001206,AAEL001400,AAEL002048,AAEL002748,AAEL002766,AAEL002867,AAEL003336,AAEL003401,AAEL003552,AAEL003913,AAEL004613,AAEL005037,AAEL005279,AAEL005728,AAEL005831,AAEL006066,AAEL006577,AAEL006769,AAEL006938,AAEL007130,AAEL008175,AAEL008482,AAEL008755,AAEL008865,AAEL009156,AAEL009202,AAEL009851,AAEL010341,AAEL010816,AAEL011087,AAEL011655,AAEL013521,AAE…	17.5	2.15	2.47	1.69878e-07	6.38742e-06	9.58112e-05
GO:0032553	ribonucleotide binding	948	121	AAEL000081,AAEL000301,AAEL000486,AAEL000583,AAEL000836,AAEL001038,AAEL001052,AAEL001200,AAEL001206,AAEL001411,AAEL001622,AAEL001673,AAEL001715,AAEL001869,AAEL001901,AAEL002048,AAEL002061,AAEL002488,AAEL002748,AAEL002766,AAEL002851,AAEL002867,AAEL002913,AAEL003103,AAEL003109,AAEL003170,AAEL003336,AAEL003383,AAEL003913,AAEL003926,AAEL004050,AAEL004076,AAEL004297,AAEL004613,AAEL004740,AAEL004743,AAE…	12.8	1.57	1.75	2.21539e-07	7.80924e-06	0.000124948
GO:0008312	7S RNA binding	6	6	AAEL001177,AAEL003377,AAEL004914,AAEL010060,AAEL013076,AAEL015236,	100	12.28	inf	2.87835e-07	9.54934e-06	0.000162339
GO:0035639	purine ribonucleoside triphosphate binding	930	118	AAEL000081,AAEL000301,AAEL000486,AAEL000583,AAEL000836,AAEL001038,AAEL001052,AAEL001200,AAEL001206,AAEL001411,AAEL001622,AAEL001673,AAEL001715,AAEL001869,AAEL001901,AAEL002048,AAEL002061,AAEL002488,AAEL002748,AAEL002766,AAEL002851,AAEL002867,AAEL002913,AAEL003103,AAEL003109,AAEL003170,AAEL003336,AAEL003383,AAEL003913,AAEL003926,AAEL004050,AAEL004076,AAEL004297,AAEL004613,AAEL004740,AAEL004743,AAE…	12.7	1.56	1.73	4.38668e-07	1.37449e-05	0.000247409
GO:1901265	nucleoside phosphate binding	1105	131	AAEL000081,AAEL000301,AAEL000486,AAEL000583,AAEL000836,AAEL001038,AAEL001052,AAEL001200,AAEL001206,AAEL001411,AAEL001622,AAEL001673,AAEL001715,AAEL001869,AAEL001901,AAEL002016,AAEL002048,AAEL002061,AAEL002488,AAEL002683,AAEL002748,AAEL002766,AAEL002851,AAEL002867,AAEL002886,AAEL002913,AAEL003103,AAEL003109,AAEL003170,AAEL003336,AAEL003383,AAEL003913,AAEL003926,AAEL004050,AAEL004076,AAEL004297,AAE…	11.9	1.46	1.6	4.0163e-06	0.00011326	0.00226519
GO:0000166	nucleotide binding	1105	131	AAEL000081,AAEL000301,AAEL000486,AAEL000583,AAEL000836,AAEL001038,AAEL001052,AAEL001200,AAEL001206,AAEL001411,AAEL001622,AAEL001673,AAEL001715,AAEL001869,AAEL001901,AAEL002016,AAEL002048,AAEL002061,AAEL002488,AAEL002683,AAEL002748,AAEL002766,AAEL002851,AAEL002867,AAEL002886,AAEL002913,AAEL003103,AAEL003109,AAEL003170,AAEL003336,AAEL003383,AAEL003913,AAEL003926,AAEL004050,AAEL004076,AAEL004297,AAE…	11.9	1.46	1.6	4.0163e-06	0.00011326	0.00226519
GO:0005198	structural molecule activity	420	61	AAEL000180,AAEL000210,AAEL000297,AAEL000418,AAEL000467,AAEL000701,AAEL000782,AAEL001439,AAEL001615,AAEL001909,AAEL001943,AAEL002418,AAEL002783,AAEL002851,AAEL002993,AAEL003397,AAEL003409,AAEL003704,AAEL003801,AAEL004034,AAEL004306,AAEL004430,AAEL004433,AAEL004546,AAEL005084,AAEL005150,AAEL005162,AAEL005413,AAEL005598,AAEL005944,AAEL006117,AAEL006311,AAEL006642,AAEL007355,AAEL008044,AAEL008582,AAE…	14.5	1.78	1.98	5.63306e-06	0.000151066	0.00317704
GO:0036094	small molecule binding	1176	137	AAEL000081,AAEL000301,AAEL000486,AAEL000583,AAEL000836,AAEL001038,AAEL001052,AAEL001200,AAEL001206,AAEL001411,AAEL001622,AAEL001673,AAEL001715,AAEL001869,AAEL001901,AAEL002016,AAEL002048,AAEL002061,AAEL002399,AAEL002488,AAEL002683,AAEL002748,AAEL002766,AAEL002851,AAEL002867,AAEL002886,AAEL002913,AAEL003103,AAEL003109,AAEL003170,AAEL003336,AAEL003383,AAEL003491,AAEL003913,AAEL003926,AAEL004050,AAE…	11.6	1.43	1.57	5.95942e-06	0.000151066	0.00336111
GO:0043168	anion binding	1083	128	AAEL000081,AAEL000301,AAEL000486,AAEL000583,AAEL000836,AAEL001038,AAEL001052,AAEL001200,AAEL001206,AAEL001411,AAEL001622,AAEL001673,AAEL001715,AAEL001869,AAEL001901,AAEL002016,AAEL002048,AAEL002061,AAEL002399,AAEL002488,AAEL002683,AAEL002748,AAEL002766,AAEL002851,AAEL002867,AAEL002886,AAEL002913,AAEL003103,AAEL003109,AAEL003170,AAEL003336,AAEL003383,AAEL003491,AAEL003913,AAEL003926,AAEL004050,AAE…	11.8	1.45	1.6	6.16048e-06	0.000151066	0.00347451
GO:0004576	oligosaccharyl transferase activity	4	4	AAEL002183,AAEL002804,AAEL004228,AAEL013071,	100	12.28	inf	4.37724e-05	0.00102865	0.0246876
GO:0030554	adenyl nucleotide binding	769	93	AAEL000081,AAEL000301,AAEL000486,AAEL000583,AAEL000836,AAEL001038,AAEL001052,AAEL001200,AAEL001206,AAEL001411,AAEL001622,AAEL001673,AAEL001715,AAEL001869,AAEL002048,AAEL002061,AAEL002488,AAEL002748,AAEL002766,AAEL002867,AAEL002913,AAEL003103,AAEL003336,AAEL003383,AAEL003913,AAEL004050,AAEL004076,AAEL004297,AAEL004438,AAEL004613,AAEL004743,AAEL005037,AAEL005191,AAEL005454,AAEL005728,AAEL005798,AAE…	12.1	1.48	1.61	5.51975e-05	0.00124526	0.0311314
GO:0032559	adenyl ribonucleotide binding	767	92	AAEL000081,AAEL000301,AAEL000486,AAEL000583,AAEL000836,AAEL001038,AAEL001052,AAEL001200,AAEL001206,AAEL001411,AAEL001622,AAEL001673,AAEL001715,AAEL001869,AAEL002048,AAEL002061,AAEL002488,AAEL002748,AAEL002766,AAEL002867,AAEL002913,AAEL003103,AAEL003336,AAEL003383,AAEL003913,AAEL004050,AAEL004076,AAEL004297,AAEL004613,AAEL004743,AAEL005037,AAEL005191,AAEL005454,AAEL005728,AAEL005798,AAEL005831,AAE…	12	1.47	1.6	8.23354e-05	0.00177721	0.0464371
GO:0016779	nucleotidyltransferase activity	68	16	AAEL000922,AAEL001331,AAEL001400,AAEL003401,AAEL003552,AAEL008755,AAEL009179,AAEL009202,AAEL009851,AAEL011087,AAEL011442,AAEL011912,AAEL014040,AAEL014831,AAEL017317,AAEL022363,	23.5	2.89	3.51	8.50792e-05	0.00177721	0.0479847
GO:0005525	GTP binding	177	30	AAEL001901,AAEL002851,AAEL003109,AAEL003170,AAEL003336,AAEL003926,AAEL004740,AAEL005084,AAEL005579,AAEL005856,AAEL006091,AAEL006642,AAEL007065,AAEL008095,AAEL008517,AAEL008543,AAEL008641,AAEL009068,AAEL009317,AAEL010012,AAEL010077,AAEL011171,AAEL012167,AAEL012250,AAEL013076,AAEL013229,AAEL014177,AAEL017368,AAEL019788,AAEL025769,	16.9	2.08	2.35	8.97863e-05	0.00180855	0.0506395
GO:0032561	guanyl ribonucleotide binding	178	30	AAEL001901,AAEL002851,AAEL003109,AAEL003170,AAEL003336,AAEL003926,AAEL004740,AAEL005084,AAEL005579,AAEL005856,AAEL006091,AAEL006642,AAEL007065,AAEL008095,AAEL008517,AAEL008543,AAEL008641,AAEL009068,AAEL009317,AAEL010012,AAEL010077,AAEL011171,AAEL012167,AAEL012250,AAEL013076,AAEL013229,AAEL014177,AAEL017368,AAEL019788,AAEL025769,	16.9	2.07	2.33	9.97917e-05	0.00187608	0.0562825
GO:0019001	guanyl nucleotide binding	178	30	AAEL001901,AAEL002851,AAEL003109,AAEL003170,AAEL003336,AAEL003926,AAEL004740,AAEL005084,AAEL005579,AAEL005856,AAEL006091,AAEL006642,AAEL007065,AAEL008095,AAEL008517,AAEL008543,AAEL008641,AAEL009068,AAEL009317,AAEL010012,AAEL010077,AAEL011171,AAEL012167,AAEL012250,AAEL013076,AAEL013229,AAEL014177,AAEL017368,AAEL019788,AAEL025769,	16.9	2.07	2.33	9.97917e-05	0.00187608	0.0562825
GO:0097367	carbohydrate derivative binding	1090	122	AAEL000081,AAEL000301,AAEL000486,AAEL000583,AAEL000836,AAEL001038,AAEL001052,AAEL001200,AAEL001206,AAEL001411,AAEL001622,AAEL001673,AAEL001715,AAEL001869,AAEL001901,AAEL002048,AAEL002061,AAEL002467,AAEL002488,AAEL002748,AAEL002766,AAEL002851,AAEL002867,AAEL002913,AAEL003103,AAEL003109,AAEL003170,AAEL003336,AAEL003383,AAEL003913,AAEL003926,AAEL004050,AAEL004076,AAEL004297,AAEL004613,AAEL004740,AAE…	11.2	1.37	1.49	0.000125452	0.00228241	0.0707547
GO:0016818	hydrolase activity, acting on acid anhydrides, in phosphorus-containing anhydrides	228	35	AAEL001092,AAEL001869,AAEL001901,AAEL002061,AAEL002207,AAEL002851,AAEL002913,AAEL003109,AAEL003170,AAEL003926,AAEL004743,AAEL005084,AAEL005856,AAEL006091,AAEL006642,AAEL006659,AAEL008134,AAEL008517,AAEL008543,AAEL008641,AAEL009068,AAEL009317,AAEL010077,AAEL010379,AAEL011136,AAEL011171,AAEL012167,AAEL013076,AAEL013229,AAEL013679,AAEL017368,AAEL019788,AAEL019847,AAEL023958,AAEL027492,	15.4	1.88	2.09	0.000189689	0.00334326	0.106984
GO:0016462	pyrophosphatase activity	220	34	AAEL001869,AAEL001901,AAEL002061,AAEL002207,AAEL002851,AAEL002913,AAEL003109,AAEL003170,AAEL003926,AAEL004743,AAEL005084,AAEL005856,AAEL006091,AAEL006642,AAEL006659,AAEL008134,AAEL008517,AAEL008543,AAEL008641,AAEL009068,AAEL009317,AAEL010077,AAEL010379,AAEL011136,AAEL011171,AAEL012167,AAEL013076,AAEL013229,AAEL013679,AAEL017368,AAEL019788,AAEL019847,AAEL023958,AAEL027492,	15.5	1.9	2.1	0.000204549	0.00349593	0.115366
GO:0005524	ATP binding	757	89	AAEL000081,AAEL000301,AAEL000486,AAEL000583,AAEL000836,AAEL001038,AAEL001052,AAEL001200,AAEL001206,AAEL001411,AAEL001622,AAEL001673,AAEL001715,AAEL001869,AAEL002048,AAEL002061,AAEL002488,AAEL002748,AAEL002766,AAEL002867,AAEL002913,AAEL003103,AAEL003336,AAEL003383,AAEL003913,AAEL004050,AAEL004076,AAEL004297,AAEL004613,AAEL004743,AAEL005037,AAEL005191,AAEL005454,AAEL005728,AAEL005798,AAEL005831,AAE…	11.8	1.44	1.56	0.000218068	0.00361737	0.122991
GO:0016817	hydrolase activity, acting on acid anhydrides	231	35	AAEL001092,AAEL001869,AAEL001901,AAEL002061,AAEL002207,AAEL002851,AAEL002913,AAEL003109,AAEL003170,AAEL003926,AAEL004743,AAEL005084,AAEL005856,AAEL006091,AAEL006642,AAEL006659,AAEL008134,AAEL008517,AAEL008543,AAEL008641,AAEL009068,AAEL009317,AAEL010077,AAEL010379,AAEL011136,AAEL011171,AAEL012167,AAEL013076,AAEL013229,AAEL013679,AAEL017368,AAEL019788,AAEL019847,AAEL023958,AAEL027492,	15.2	1.86	2.05	0.000245514	0.00395629	0.13847
GO:0015035	protein-disulfide reductase activity	14	6	AAEL002886,AAEL003206,AAEL008783,AAEL020466,AAEL024100,AAEL024975,	42.9	5.26	8.51	0.000487732	0.00743462	0.275081
GO:0015036	disulfide oxidoreductase activity	14	6	AAEL002886,AAEL003206,AAEL008783,AAEL020466,AAEL024100,AAEL024975,	42.9	5.26	8.51	0.000487732	0.00743462	0.275081
GO:0016972	thiol oxidase activity	3	3	AAEL020466,AAEL024100,AAEL024975,	100	12.28	inf	0.000538968	0.00759946	0.303978
GO:0016670	oxidoreductase activity, acting on a sulfur group of donors, oxygen as acceptor	3	3	AAEL020466,AAEL024100,AAEL024975,	100	12.28	inf	0.000538968	0.00759946	0.303978
GO:0016971	flavin-linked sulfhydryl oxidase activity	3	3	AAEL020466,AAEL024100,AAEL024975,	100	12.28	inf	0.000538968	0.00759946	0.303978
GO:0034062	5'-3' RNA polymerase activity	31	9	AAEL001400,AAEL003401,AAEL003552,AAEL008755,AAEL009202,AAEL011087,AAEL014831,AAEL017317,AAEL022363,	29	3.56	4.65	0.000592548	0.00777203	0.334197
GO:0097747	RNA polymerase activity	31	9	AAEL001400,AAEL003401,AAEL003552,AAEL008755,AAEL009202,AAEL011087,AAEL014831,AAEL017317,AAEL022363,	29	3.56	4.65	0.000592548	0.00777203	0.334197
GO:0003899	DNA-directed 5'-3' RNA polymerase activity	31	9	AAEL001400,AAEL003401,AAEL003552,AAEL008755,AAEL009202,AAEL011087,AAEL014831,AAEL017317,AAEL022363,	29	3.56	4.65	0.000592548	0.00777203	0.334197
GO:0016757	glycosyltransferase activity	142	23	AAEL000383,AAEL000444,AAEL000559,AAEL000899,AAEL001533,AAEL002183,AAEL002483,AAEL002804,AAEL002996,AAEL003091,AAEL004228,AAEL005976,AAEL009174,AAEL010227,AAEL010596,AAEL011700,AAEL012034,AAEL012172,AAEL013071,AAEL013078,AAEL019605,AAEL022680,AAEL025750,	16.2	1.99	2.21	0.00109488	0.0140344	0.617512
GO:0043021	ribonucleoprotein complex binding	16	6	AAEL003926,AAEL005856,AAEL006115,AAEL006187,AAEL010042,AAEL010060,	37.5	4.6	6.8	0.00112859	0.014145	0.636523
GO:0017111	nucleoside-triphosphatase activity	208	30	AAEL001901,AAEL002061,AAEL002851,AAEL002913,AAEL003109,AAEL003170,AAEL003926,AAEL004743,AAEL005084,AAEL005856,AAEL006091,AAEL006642,AAEL008134,AAEL008517,AAEL008543,AAEL008641,AAEL009068,AAEL009317,AAEL010077,AAEL010379,AAEL011136,AAEL011171,AAEL012167,AAEL013076,AAEL013229,AAEL013679,AAEL017368,AAEL019788,AAEL019847,AAEL023958,	14.4	1.77	1.93	0.00149039	0.0182734	0.840578
GO:0003924	GTPase activity	130	21	AAEL001901,AAEL002851,AAEL003109,AAEL003170,AAEL003926,AAEL005084,AAEL005856,AAEL006091,AAEL006642,AAEL008517,AAEL008543,AAEL008641,AAEL009068,AAEL009317,AAEL010077,AAEL011171,AAEL012167,AAEL013076,AAEL013229,AAEL017368,AAEL019788,	16.2	1.98	2.2	0.00182929	0.0215443	1
GO:0016864	intramolecular oxidoreductase activity, transposing S-S bonds	4	3	AAEL000641,AAEL001432,AAEL010065,	75	9.21	33.94	0.00202456	0.0215443	1
GO:0022884	macromolecule transmembrane transporter activity	4	3	AAEL005471,AAEL007001,AAEL025660,	75	9.21	33.94	0.00202456	0.0215443	1
GO:0008320	protein transmembrane transporter activity	4	3	AAEL005471,AAEL007001,AAEL025660,	75	9.21	33.94	0.00202456	0.0215443	1
GO:0003756	protein disulfide isomerase activity	4	3	AAEL000641,AAEL001432,AAEL010065,	75	9.21	33.94	0.00202456	0.0215443	1
GO:0004828	serine-tRNA ligase activity	4	3	AAEL005037,AAEL005831,AAEL006938,	75	9.21	33.94	0.00202456	0.0215443	1
GO:0140318	protein transporter activity	4	3	AAEL005471,AAEL007001,AAEL025660,	75	9.21	33.94	0.00202456	0.0215443	1
GO:0033218	amide binding	24	7	AAEL001177,AAEL008434,AAEL010060,AAEL010491,AAEL013844,AAEL026177,AAEL029037,	29.2	3.58	4.67	0.00234522	0.0244945	1
GO:0016758	hexosyltransferase activity	94	16	AAEL000383,AAEL000444,AAEL000559,AAEL001533,AAEL002183,AAEL002483,AAEL002804,AAEL002996,AAEL003091,AAEL004228,AAEL009174,AAEL010227,AAEL011700,AAEL012034,AAEL013071,AAEL025750,	17	2.09	2.34	0.00360213	0.0369382	1
GO:0016860	intramolecular oxidoreductase activity	14	5	AAEL000641,AAEL001432,AAEL006144,AAEL008783,AAEL010065,	35.7	4.38	6.29	0.00380945	0.0379277	1
GO:0016740	transferase activity	1048	109	AAEL000178,AAEL000383,AAEL000444,AAEL000559,AAEL000674,AAEL000899,AAEL000922,AAEL001038,AAEL001331,AAEL001333,AAEL001400,AAEL001533,AAEL001622,AAEL001740,AAEL001931,AAEL002069,AAEL002108,AAEL002174,AAEL002183,AAEL002399,AAEL002483,AAEL002486,AAEL002804,AAEL002996,AAEL003084,AAEL003091,AAEL003103,AAEL003401,AAEL003508,AAEL003536,AAEL003552,AAEL003907,AAEL004228,AAEL004297,AAEL004571,AAEL004697,AAE…	10.4	1.28	1.35	0.00383312	0.0379277	1
GO:0005048	signal sequence binding	5	3	AAEL001177,AAEL008434,AAEL010060,	60	7.37	16.97	0.00475441	0.0462325	1
GO:0016667	oxidoreductase activity, acting on a sulfur group of donors	21	6	AAEL002886,AAEL003206,AAEL008783,AAEL020466,AAEL024100,AAEL024975,	28.6	3.51	4.53	0.00537589	0.0513899	1
GO:0042626	ATPase-coupled transmembrane transporter activity	50	10	AAEL002913,AAEL004743,AAEL005471,AAEL007777,AAEL008134,AAEL008787,AAEL010379,AAEL012819,AAEL019847,AAEL023958,	20	2.46	2.84	0.00626848	0.0534152	1
GO:0005047	signal recognition particle binding	2	2	AAEL005856,AAEL010060,	100	12.28	inf	0.00662955	0.0534152	1
GO:0017110	nucleoside-diphosphatase activity	2	2	AAEL006659,AAEL027492,	100	12.28	inf	0.00662955	0.0534152	1
GO:0004816	asparagine-tRNA ligase activity	2	2	AAEL006577,AAEL011655,	100	12.28	inf	0.00662955	0.0534152	1
GO:0004376	glycolipid mannosyltransferase activity	2	2	AAEL000559,AAEL012034,	100	12.28	inf	0.00662955	0.0534152	1
GO:0061711	N(6)-L-threonylcarbamoyladenine synthase activity	2	2	AAEL001931,AAEL004571,	100	12.28	inf	0.00662955	0.0534152	1
GO:0019781	NEDD8 activating enzyme activity	2	2	AAEL007738,AAEL012306,	100	12.28	inf	0.00662955	0.0534152	1
GO:0004579	dolichyl-diphosphooligosaccharide-protein glycotransferase activity	2	2	AAEL002183,AAEL013071,	100	12.28	inf	0.00662955	0.0534152	1
GO:0004830	tryptophan-tRNA ligase activity	2	2	AAEL006769,AAEL013521,	100	12.28	inf	0.00662955	0.0534152	1
GO:0003860	3-hydroxyisobutyryl-CoA hydrolase activity	2	2	AAEL010008,AAEL026984,	100	12.28	inf	0.00662955	0.0534152	1
GO:0030942	endoplasmic reticulum signal peptide binding	2	2	AAEL001177,AAEL010060,	100	12.28	inf	0.00662955	0.0534152	1
GO:0000062	fatty-acyl-CoA binding	6	3	AAEL013844,AAEL026177,AAEL029037,	50	6.14	11.31	0.00893458	0.068096	1
GO:0050145	nucleoside monophosphate kinase activity	6	3	AAEL008131,AAEL011006,AAEL013679,	50	6.14	11.31	0.00893458	0.068096	1
GO:0120227	acyl-CoA binding	6	3	AAEL013844,AAEL026177,AAEL029037,	50	6.14	11.31	0.00893458	0.068096	1
GO:1901567	fatty acid derivative binding	6	3	AAEL013844,AAEL026177,AAEL029037,	50	6.14	11.31	0.00893458	0.068096	1
GO:0000030	mannosyltransferase activity	11	4	AAEL000559,AAEL002483,AAEL010227,AAEL012034,	36.4	4.46	6.47	0.0090684	0.0681943	1
GO:0004518	nuclease activity	74	12	AAEL000293,AAEL001089,AAEL007854,AAEL008175,AAEL008482,AAEL008865,AAEL009589,AAEL011560,AAEL017101,AAEL022169,AAEL022595,AAEL025232,	16.2	1.99	2.2	0.0158166	0.117375	1
GO:0004519	endonuclease activity	42	8	AAEL000293,AAEL007854,AAEL008175,AAEL008482,AAEL009589,AAEL017101,AAEL022169,AAEL022595,	19	2.34	2.67	0.0184579	0.135198	1
GO:0004045	aminoacyl-tRNA hydrolase activity	3	2	AAEL006066,AAEL014153,	66.7	8.18	22.6	0.0188107	0.136016	1
GO:0016853	isomerase activity	76	12	AAEL000641,AAEL000852,AAEL001432,AAEL004779,AAEL005690,AAEL006144,AAEL008783,AAEL009497,AAEL009911,AAEL010065,AAEL010491,AAEL020244,	15.8	1.94	2.13	0.0192748	0.137607	1
GO:0016859	cis-trans isomerase activity	28	6	AAEL000852,AAEL004779,AAEL005690,AAEL009911,AAEL010491,AAEL020244,	21.4	2.63	3.09	0.0229169	0.15957	1
GO:0003755	peptidyl-prolyl cis-trans isomerase activity	28	6	AAEL000852,AAEL004779,AAEL005690,AAEL009911,AAEL010491,AAEL020244,	21.4	2.63	3.09	0.0229169	0.15957	1
GO:0003712	transcription coregulator activity	45	8	AAEL000720,AAEL000982,AAEL002284,AAEL004132,AAEL004436,AAEL004574,AAEL007825,AAEL010341,	17.8	2.18	2.45	0.0272025	0.1871	1
GO:0042277	peptide binding	9	3	AAEL001177,AAEL008434,AAEL010060,	33.3	4.09	5.65	0.0311827	0.206906	1
GO:0008641	ubiquitin-like modifier activating enzyme activity	9	3	AAEL004076,AAEL007738,AAEL012306,	33.3	4.09	5.65	0.0311827	0.206906	1
GO:0043022	ribosome binding	9	3	AAEL003926,AAEL006115,AAEL006187,	33.3	4.09	5.65	0.0311827	0.206906	1
GO:0000339	RNA cap binding	4	2	AAEL006135,AAEL023347,	50	6.14	11.3	0.0355969	0.22558	1
GO:0001607	neuromedin U receptor activity	4	2	AAEL017048,AAEL017335,	50	6.14	11.3	0.0355969	0.22558	1
GO:0016289	CoA hydrolase activity	4	2	AAEL010008,AAEL026984,	50	6.14	11.3	0.0355969	0.22558	1
GO:0046912	acyltransferase, acyl groups converted into alkyl on transfer	4	2	AAEL004297,AAEL005201,	50	6.14	11.3	0.0355969	0.22558	1
GO:1901681	sulfur compound binding	16	4	AAEL005429,AAEL013844,AAEL026177,AAEL029037,	25	3.07	3.77	0.0360934	0.226186	1
GO:0003824	catalytic activity	3624	320	AAEL000178,AAEL000231,AAEL000279,AAEL000293,AAEL000332,AAEL000372,AAEL000383,AAEL000438,AAEL000444,AAEL000559,AAEL000641,AAEL000674,AAEL000852,AAEL000899,AAEL000922,AAEL000947,AAEL001038,AAEL001089,AAEL001092,AAEL001200,AAEL001206,AAEL001331,AAEL001333,AAEL001400,AAEL001432,AAEL001533,AAEL001597,AAEL001622,AAEL001693,AAEL001740,AAEL001797,AAEL001807,AAEL001839,AAEL001846,AAEL001869,AAEL001901,AAE…	8.8	1.08	1.14	0.0368113	0.228149	1
GO:0016702	oxidoreductase activity, acting on single donors with incorporation of molecular oxygen, incorporation of two atoms of oxygen	10	3	AAEL003354,AAEL013637,AAEL026357,	30	3.68	4.85	0.041905	0.24439	1
GO:0004540	ribonuclease activity	33	6	AAEL000293,AAEL001089,AAEL008175,AAEL008865,AAEL017101,AAEL022169,	18.2	2.23	2.52	0.0477634	0.24439	1
GO:0044877	protein-containing complex binding	59	9	AAEL001411,AAEL002539,AAEL003926,AAEL005856,AAEL006115,AAEL006187,AAEL008641,AAEL010042,AAEL010060,	15.3	1.87	2.04	0.0479876	0.24439	1

## Sheet: 8hp_BP
ID	Name	Bgd count	Result count	Result gene list	Pct of bgd	Fold enrichment	Odds ratio	P-value	Benjamini	Bonferroni
GO:0006091	generation of precursor metabolites and energy	116	60	AAEL000182,AAEL000454,AAEL000746,AAEL000986,AAEL001109,AAEL001164,AAEL001210,AAEL001501,AAEL002542,AAEL002737,AAEL002764,AAEL003234,AAEL003675,AAEL004221,AAEL004457,AAEL004829,AAEL005143,AAEL005170,AAEL005552,AAEL005766,AAEL005946,AAEL006070,AAEL006428,AAEL006458,AAEL006833,AAEL006928,AAEL007054,AAEL007752,AAEL007868,AAEL008166,AAEL008167,AAEL008697,AAEL008871,AAEL009066,AAEL009257,AAEL009389,AAE…	51.7	9.53	20.64	2.30993e-45	2.23602e-42	2.23602e-42
GO:0046034	ATP metabolic process	53	36	AAEL000182,AAEL000986,AAEL001210,AAEL002504,AAEL002542,AAEL002813,AAEL002827,AAEL003393,AAEL004060,AAEL004423,AAEL005610,AAEL005766,AAEL005946,AAEL006070,AAEL006509,AAEL007868,AAEL008848,AAEL009066,AAEL009964,AAEL010230,AAEL010801,AAEL010823,AAEL011157,AAEL012175,AAEL012552,AAEL012731,AAEL012740,AAEL012950,AAEL014889,AAEL016984,AAEL018658,AAEL018667,AAEL018685,AAEL020429,AAEL024040,AAEL024228,	67.9	12.52	39.2	1.35261e-33	6.54663e-31	1.30933e-30
GO:0022900	electron transport chain	68	39	AAEL000182,AAEL000986,AAEL001109,AAEL001164,AAEL001210,AAEL001501,AAEL002737,AAEL003234,AAEL003675,AAEL004457,AAEL004829,AAEL005143,AAEL005170,AAEL005946,AAEL006428,AAEL006928,AAEL007054,AAEL007752,AAEL007868,AAEL008697,AAEL008871,AAEL009066,AAEL009257,AAEL010230,AAEL010330,AAEL010608,AAEL010801,AAEL011157,AAEL011871,AAEL012552,AAEL012950,AAEL013739,AAEL013744,AAEL014379,AAEL014889,AAEL014944,AAE…	57.4	10.57	25	4.17361e-32	1.34668e-29	4.04005e-29
GO:0044237	cellular metabolic process	2282	242	AAEL000004,AAEL000084,AAEL000182,AAEL000424,AAEL000454,AAEL000564,AAEL000654,AAEL000746,AAEL000759,AAEL000986,AAEL000999,AAEL001030,AAEL001100,AAEL001109,AAEL001134,AAEL001164,AAEL001176,AAEL001204,AAEL001210,AAEL001501,AAEL001670,AAEL001887,AAEL002304,AAEL002331,AAEL002401,AAEL002465,AAEL002504,AAEL002542,AAEL002703,AAEL002737,AAEL002764,AAEL002779,AAEL002810,AAEL002813,AAEL002827,AAEL002898,AAE…	10.6	1.95	2.79	7.61941e-30	1.8439e-27	7.37559e-27
GO:0044281	small molecule metabolic process	400	85	AAEL000746,AAEL000839,AAEL001030,AAEL001100,AAEL001134,AAEL001176,AAEL001887,AAEL002331,AAEL002504,AAEL002542,AAEL002703,AAEL002779,AAEL002813,AAEL002827,AAEL002898,AAEL003213,AAEL003246,AAEL003393,AAEL003666,AAEL003746,AAEL003770,AAEL003994,AAEL004060,AAEL004180,AAEL004294,AAEL004338,AAEL004423,AAEL004970,AAEL005106,AAEL005308,AAEL005552,AAEL005610,AAEL005676,AAEL005688,AAEL005766,AAEL006070,AAE…	21.3	3.92	5.31	6.51474e-29	1.26125e-26	6.30627e-26
GO:0008152	metabolic process	3712	325	AAEL000004,AAEL000084,AAEL000182,AAEL000424,AAEL000454,AAEL000564,AAEL000654,AAEL000746,AAEL000759,AAEL000797,AAEL000839,AAEL000986,AAEL000999,AAEL001030,AAEL001048,AAEL001100,AAEL001109,AAEL001134,AAEL001164,AAEL001176,AAEL001194,AAEL001204,AAEL001210,AAEL001501,AAEL001588,AAEL001649,AAEL001670,AAEL001737,AAEL001747,AAEL001887,AAEL002107,AAEL002304,AAEL002331,AAEL002401,AAEL002465,AAEL002504,AAE…	8.8	1.61	2.46	1.4267e-26	2.30174e-24	1.38104e-23
GO:0045333	cellular respiration	44	28	AAEL000182,AAEL000454,AAEL000746,AAEL000986,AAEL001210,AAEL002764,AAEL004829,AAEL005552,AAEL005946,AAEL006833,AAEL007868,AAEL008166,AAEL008167,AAEL008871,AAEL009066,AAEL010230,AAEL010330,AAEL010608,AAEL010801,AAEL010814,AAEL011157,AAEL011789,AAEL012552,AAEL012950,AAEL014505,AAEL014889,AAEL018658,AAEL018685,	63.6	11.73	31.95	3.66148e-25	5.06331e-23	3.54431e-22
GO:0055114	obsolete oxidation-reduction process	671	106	AAEL000454,AAEL000746,AAEL000797,AAEL000986,AAEL001048,AAEL001109,AAEL001134,AAEL001164,AAEL001194,AAEL001210,AAEL001501,AAEL001737,AAEL001747,AAEL002107,AAEL002703,AAEL002737,AAEL002825,AAEL002861,AAEL003125,AAEL003234,AAEL003423,AAEL003675,AAEL003762,AAEL003995,AAEL004180,AAEL004338,AAEL004457,AAEL004823,AAEL005143,AAEL005170,AAEL005308,AAEL005336,AAEL005508,AAEL005790,AAEL005946,AAEL006428,AAE…	15.8	2.91	3.76	1.12425e-24	1.36035e-22	1.08828e-21
GO:0009060	aerobic respiration	42	27	AAEL000182,AAEL000454,AAEL000746,AAEL000986,AAEL001210,AAEL002764,AAEL005552,AAEL005946,AAEL006833,AAEL007868,AAEL008166,AAEL008167,AAEL008871,AAEL009066,AAEL010230,AAEL010330,AAEL010608,AAEL010801,AAEL010814,AAEL011157,AAEL011789,AAEL012552,AAEL012950,AAEL014505,AAEL014889,AAEL018658,AAEL018685,	64.3	11.85	32.81	1.75668e-24	1.88941e-22	1.70046e-21
GO:0015980	energy derivation by oxidation of organic compounds	50	29	AAEL000182,AAEL000454,AAEL000746,AAEL000986,AAEL001210,AAEL002764,AAEL004221,AAEL004829,AAEL005552,AAEL005946,AAEL006833,AAEL007868,AAEL008166,AAEL008167,AAEL008871,AAEL009066,AAEL010230,AAEL010330,AAEL010608,AAEL010801,AAEL010814,AAEL011157,AAEL011789,AAEL012552,AAEL012950,AAEL014505,AAEL014889,AAEL018658,AAEL018685,	58	10.69	25.24	2.37373e-24	2.29777e-22	2.29777e-21
GO:0072521	purine-containing compound metabolic process	89	37	AAEL001176,AAEL002504,AAEL002542,AAEL002813,AAEL002827,AAEL003213,AAEL003393,AAEL003770,AAEL004060,AAEL004338,AAEL004423,AAEL005308,AAEL005552,AAEL005610,AAEL005676,AAEL005766,AAEL006070,AAEL006509,AAEL008848,AAEL009311,AAEL009964,AAEL010640,AAEL010823,AAEL012175,AAEL012359,AAEL012731,AAEL012740,AAEL012825,AAEL013394,AAEL016984,AAEL018667,AAEL020429,AAEL024040,AAEL024228,AAEL026393,AAEL027199,AAE…	41.6	7.66	13.15	5.32927e-24	4.68976e-22	5.15874e-21
GO:1902600	proton transmembrane transport	56	30	AAEL000137,AAEL000291,AAEL002464,AAEL002504,AAEL002737,AAEL002813,AAEL002827,AAEL003234,AAEL003393,AAEL004060,AAEL004423,AAEL005170,AAEL005610,AAEL006509,AAEL006516,AAEL007752,AAEL008697,AAEL008848,AAEL009257,AAEL009964,AAEL010819,AAEL010823,AAEL012035,AAEL012113,AAEL012175,AAEL012740,AAEL014944,AAEL018667,AAEL020429,AAEL024040,	53.6	9.88	21.12	9.38973e-24	7.57439e-22	9.08926e-21
GO:0055086	nucleobase-containing small molecule metabolic process	144	45	AAEL001134,AAEL001176,AAEL002331,AAEL002504,AAEL002542,AAEL002813,AAEL002827,AAEL003213,AAEL003246,AAEL003393,AAEL003770,AAEL004060,AAEL004338,AAEL004423,AAEL005106,AAEL005308,AAEL005552,AAEL005610,AAEL005676,AAEL005766,AAEL006070,AAEL006509,AAEL008848,AAEL009311,AAEL009964,AAEL009968,AAEL010640,AAEL010823,AAEL011703,AAEL012175,AAEL012359,AAEL012382,AAEL012629,AAEL012731,AAEL012740,AAEL012825,AAE…	31.3	5.76	8.48	7.40975e-23	5.51741e-21	7.17264e-20
GO:0006163	purine nucleotide metabolic process	79	33	AAEL002504,AAEL002542,AAEL002813,AAEL002827,AAEL003393,AAEL003770,AAEL004060,AAEL004338,AAEL004423,AAEL005308,AAEL005552,AAEL005610,AAEL005766,AAEL006070,AAEL006509,AAEL008848,AAEL009311,AAEL009964,AAEL010640,AAEL010823,AAEL012175,AAEL012359,AAEL012731,AAEL012740,AAEL012825,AAEL013394,AAEL016984,AAEL018667,AAEL020429,AAEL024040,AAEL024228,AAEL027199,AAEL027453,	41.8	7.7	13.17	1.30656e-21	9.03391e-20	1.26475e-18
GO:0009206	purine ribonucleoside triphosphate biosynthetic process	20	18	AAEL002504,AAEL002813,AAEL002827,AAEL003393,AAEL004060,AAEL004423,AAEL005610,AAEL006509,AAEL008848,AAEL009964,AAEL010823,AAEL012175,AAEL012359,AAEL012740,AAEL018667,AAEL020429,AAEL024040,AAEL027453,	90	16.59	161.71	2.22753e-21	1.34766e-19	2.15625e-18
GO:0009145	purine nucleoside triphosphate biosynthetic process	20	18	AAEL002504,AAEL002813,AAEL002827,AAEL003393,AAEL004060,AAEL004423,AAEL005610,AAEL006509,AAEL008848,AAEL009964,AAEL010823,AAEL012175,AAEL012359,AAEL012740,AAEL018667,AAEL020429,AAEL024040,AAEL027453,	90	16.59	161.71	2.22753e-21	1.34766e-19	2.15625e-18
GO:0009117	nucleotide metabolic process	119	39	AAEL002504,AAEL002542,AAEL002813,AAEL002827,AAEL003246,AAEL003393,AAEL003770,AAEL004060,AAEL004338,AAEL004423,AAEL005106,AAEL005308,AAEL005552,AAEL005610,AAEL005766,AAEL006070,AAEL006509,AAEL008848,AAEL009311,AAEL009964,AAEL009968,AAEL010640,AAEL010823,AAEL011703,AAEL012175,AAEL012359,AAEL012382,AAEL012629,AAEL012731,AAEL012740,AAEL012825,AAEL013394,AAEL016984,AAEL018667,AAEL020429,AAEL024040,AAE…	32.8	6.04	9.02	8.57145e-21	4.60953e-19	8.29716e-18
GO:0006753	nucleoside phosphate metabolic process	119	39	AAEL002504,AAEL002542,AAEL002813,AAEL002827,AAEL003246,AAEL003393,AAEL003770,AAEL004060,AAEL004338,AAEL004423,AAEL005106,AAEL005308,AAEL005552,AAEL005610,AAEL005766,AAEL006070,AAEL006509,AAEL008848,AAEL009311,AAEL009964,AAEL009968,AAEL010640,AAEL010823,AAEL011703,AAEL012175,AAEL012359,AAEL012382,AAEL012629,AAEL012731,AAEL012740,AAEL012825,AAEL013394,AAEL016984,AAEL018667,AAEL020429,AAEL024040,AAE…	32.8	6.04	9.02	8.57145e-21	4.60953e-19	8.29716e-18
GO:0019637	organophosphate metabolic process	231	54	AAEL000004,AAEL001670,AAEL002465,AAEL002504,AAEL002542,AAEL002703,AAEL002813,AAEL002827,AAEL003246,AAEL003363,AAEL003393,AAEL003770,AAEL004060,AAEL004338,AAEL004423,AAEL005106,AAEL005308,AAEL005552,AAEL005610,AAEL005766,AAEL006070,AAEL006509,AAEL008393,AAEL008848,AAEL009185,AAEL009311,AAEL009389,AAEL009964,AAEL009968,AAEL010223,AAEL010465,AAEL010505,AAEL010640,AAEL010823,AAEL011627,AAEL011703,AAE…	23.4	4.31	5.74	1.35072e-20	6.88154e-19	1.30749e-17
GO:0009144	purine nucleoside triphosphate metabolic process	21	18	AAEL002504,AAEL002813,AAEL002827,AAEL003393,AAEL004060,AAEL004423,AAEL005610,AAEL006509,AAEL008848,AAEL009964,AAEL010823,AAEL012175,AAEL012359,AAEL012740,AAEL018667,AAEL020429,AAEL024040,AAEL027453,	85.7	15.8	107.79	1.48141e-20	7.17004e-19	1.43401e-17
GO:0009150	purine ribonucleotide metabolic process	81	32	AAEL002504,AAEL002542,AAEL002813,AAEL002827,AAEL003393,AAEL003770,AAEL004060,AAEL004338,AAEL004423,AAEL005308,AAEL005552,AAEL005610,AAEL005766,AAEL006070,AAEL006509,AAEL008848,AAEL009311,AAEL009964,AAEL010640,AAEL010823,AAEL012175,AAEL012359,AAEL012731,AAEL012740,AAEL013394,AAEL016984,AAEL018667,AAEL020429,AAEL024040,AAEL024228,AAEL027199,AAEL027453,	39.5	7.28	11.97	4.19922e-20	1.93564e-18	4.06485e-17
GO:0019693	ribose phosphate metabolic process	82	32	AAEL002504,AAEL002542,AAEL002813,AAEL002827,AAEL003393,AAEL003770,AAEL004060,AAEL004338,AAEL004423,AAEL005308,AAEL005552,AAEL005610,AAEL005766,AAEL006070,AAEL006509,AAEL008848,AAEL009311,AAEL009964,AAEL010640,AAEL010823,AAEL012175,AAEL012359,AAEL012731,AAEL012740,AAEL013394,AAEL016984,AAEL018667,AAEL020429,AAEL024040,AAEL024228,AAEL027199,AAEL027453,	39	7.19	11.73	6.54212e-20	2.67616e-18	6.33277e-17
GO:0009259	ribonucleotide metabolic process	82	32	AAEL002504,AAEL002542,AAEL002813,AAEL002827,AAEL003393,AAEL003770,AAEL004060,AAEL004338,AAEL004423,AAEL005308,AAEL005552,AAEL005610,AAEL005766,AAEL006070,AAEL006509,AAEL008848,AAEL009311,AAEL009964,AAEL010640,AAEL010823,AAEL012175,AAEL012359,AAEL012731,AAEL012740,AAEL013394,AAEL016984,AAEL018667,AAEL020429,AAEL024040,AAEL024228,AAEL027199,AAEL027453,	39	7.19	11.73	6.54212e-20	2.67616e-18	6.33277e-17
GO:0015985	energy coupled proton transport, down electrochemical gradient	17	16	AAEL002504,AAEL002813,AAEL002827,AAEL003393,AAEL004060,AAEL004423,AAEL005610,AAEL006509,AAEL008848,AAEL009964,AAEL010823,AAEL012175,AAEL012740,AAEL018667,AAEL020429,AAEL024040,	94.1	17.35	286.53	7.51461e-20	2.67616e-18	7.27414e-17
GO:0006754	ATP biosynthetic process	17	16	AAEL002504,AAEL002813,AAEL002827,AAEL003393,AAEL004060,AAEL004423,AAEL005610,AAEL006509,AAEL008848,AAEL009964,AAEL010823,AAEL012175,AAEL012740,AAEL018667,AAEL020429,AAEL024040,	94.1	17.35	286.53	7.51461e-20	2.67616e-18	7.27414e-17
GO:0015986	ATP synthesis coupled proton transport	17	16	AAEL002504,AAEL002813,AAEL002827,AAEL003393,AAEL004060,AAEL004423,AAEL005610,AAEL006509,AAEL008848,AAEL009964,AAEL010823,AAEL012175,AAEL012740,AAEL018667,AAEL020429,AAEL024040,	94.1	17.35	286.53	7.51461e-20	2.67616e-18	7.27414e-17
GO:0009201	ribonucleoside triphosphate biosynthetic process	22	18	AAEL002504,AAEL002813,AAEL002827,AAEL003393,AAEL004060,AAEL004423,AAEL005610,AAEL006509,AAEL008848,AAEL009964,AAEL010823,AAEL012175,AAEL012359,AAEL012740,AAEL018667,AAEL020429,AAEL024040,AAEL027453,	81.8	15.08	80.84	7.74097e-20	2.67616e-18	7.49326e-17
GO:0009142	nucleoside triphosphate biosynthetic process	22	18	AAEL002504,AAEL002813,AAEL002827,AAEL003393,AAEL004060,AAEL004423,AAEL005610,AAEL006509,AAEL008848,AAEL009964,AAEL010823,AAEL012175,AAEL012359,AAEL012740,AAEL018667,AAEL020429,AAEL024040,AAEL027453,	81.8	15.08	80.84	7.74097e-20	2.67616e-18	7.49326e-17
GO:0009205	purine ribonucleoside triphosphate metabolic process	25	19	AAEL002504,AAEL002813,AAEL002827,AAEL003393,AAEL004060,AAEL004423,AAEL005610,AAEL006509,AAEL008848,AAEL009964,AAEL010823,AAEL012175,AAEL012359,AAEL012731,AAEL012740,AAEL018667,AAEL020429,AAEL024040,AAEL027453,	76	14.01	56.97	8.91386e-20	2.87621e-18	8.62862e-17
GO:0009141	nucleoside triphosphate metabolic process	25	19	AAEL002504,AAEL002813,AAEL002827,AAEL003393,AAEL004060,AAEL004423,AAEL005610,AAEL006509,AAEL008848,AAEL009964,AAEL010823,AAEL012175,AAEL012359,AAEL012629,AAEL012740,AAEL018667,AAEL020429,AAEL024040,AAEL027453,	76	14.01	56.97	8.91386e-20	2.87621e-18	8.62862e-17
GO:0009199	ribonucleoside triphosphate metabolic process	23	18	AAEL002504,AAEL002813,AAEL002827,AAEL003393,AAEL004060,AAEL004423,AAEL005610,AAEL006509,AAEL008848,AAEL009964,AAEL010823,AAEL012175,AAEL012359,AAEL012740,AAEL018667,AAEL020429,AAEL024040,AAEL027453,	78.3	14.43	64.66	3.38307e-19	1.05639e-17	3.27481e-16
GO:0072522	purine-containing compound biosynthetic process	66	28	AAEL001176,AAEL002504,AAEL002813,AAEL002827,AAEL003393,AAEL003770,AAEL004060,AAEL004338,AAEL004423,AAEL005308,AAEL005610,AAEL006509,AAEL008848,AAEL009964,AAEL010640,AAEL010823,AAEL012175,AAEL012359,AAEL012731,AAEL012740,AAEL012825,AAEL013394,AAEL018667,AAEL020429,AAEL024040,AAEL026393,AAEL027199,AAEL027453,	42.4	7.82	13.42	9.6823e-19	2.9289e-17	9.37247e-16
GO:0009987	cellular process	4254	331	AAEL000004,AAEL000084,AAEL000137,AAEL000182,AAEL000246,AAEL000291,AAEL000424,AAEL000434,AAEL000454,AAEL000564,AAEL000654,AAEL000746,AAEL000759,AAEL000839,AAEL000934,AAEL000986,AAEL000999,AAEL001030,AAEL001100,AAEL001109,AAEL001134,AAEL001142,AAEL001164,AAEL001176,AAEL001204,AAEL001210,AAEL001501,AAEL001670,AAEL001710,AAEL001752,AAEL001887,AAEL002304,AAEL002331,AAEL002401,AAEL002433,AAEL002436,AAE…	7.8	1.43	2.05	1.32753e-17	3.89408e-16	1.28505e-14
GO:0006164	purine nucleotide biosynthetic process	62	26	AAEL002504,AAEL002813,AAEL002827,AAEL003393,AAEL003770,AAEL004060,AAEL004338,AAEL004423,AAEL005308,AAEL005610,AAEL006509,AAEL008848,AAEL009964,AAEL010640,AAEL010823,AAEL012175,AAEL012359,AAEL012731,AAEL012740,AAEL012825,AAEL013394,AAEL018667,AAEL020429,AAEL024040,AAEL027199,AAEL027453,	41.9	7.73	13.11	2.43792e-17	6.94089e-16	2.3599e-14
GO:0009152	purine ribonucleotide biosynthetic process	61	25	AAEL002504,AAEL002813,AAEL002827,AAEL003393,AAEL003770,AAEL004060,AAEL004338,AAEL004423,AAEL005308,AAEL005610,AAEL006509,AAEL008848,AAEL009964,AAEL010640,AAEL010823,AAEL012175,AAEL012359,AAEL012731,AAEL012740,AAEL013394,AAEL018667,AAEL020429,AAEL024040,AAEL027199,AAEL027453,	41	7.55	12.59	1.96158e-16	5.42516e-15	1.89881e-13
GO:1901293	nucleoside phosphate biosynthetic process	87	29	AAEL002504,AAEL002813,AAEL002827,AAEL003393,AAEL003770,AAEL004060,AAEL004338,AAEL004423,AAEL005106,AAEL005308,AAEL005610,AAEL006509,AAEL008848,AAEL009964,AAEL010640,AAEL010823,AAEL011703,AAEL012175,AAEL012359,AAEL012629,AAEL012731,AAEL012740,AAEL012825,AAEL013394,AAEL018667,AAEL020429,AAEL024040,AAEL027199,AAEL027453,	33.3	6.14	9.11	5.3402e-16	1.39711e-14	5.16932e-13
GO:0009165	nucleotide biosynthetic process	87	29	AAEL002504,AAEL002813,AAEL002827,AAEL003393,AAEL003770,AAEL004060,AAEL004338,AAEL004423,AAEL005106,AAEL005308,AAEL005610,AAEL006509,AAEL008848,AAEL009964,AAEL010640,AAEL010823,AAEL011703,AAEL012175,AAEL012359,AAEL012629,AAEL012731,AAEL012740,AAEL012825,AAEL013394,AAEL018667,AAEL020429,AAEL024040,AAEL027199,AAEL027453,	33.3	6.14	9.11	5.3402e-16	1.39711e-14	5.16932e-13
GO:0090407	organophosphate biosynthetic process	161	39	AAEL000004,AAEL001670,AAEL002465,AAEL002504,AAEL002703,AAEL002813,AAEL002827,AAEL003393,AAEL003770,AAEL004060,AAEL004338,AAEL004423,AAEL005106,AAEL005308,AAEL005610,AAEL006509,AAEL008393,AAEL008848,AAEL009185,AAEL009964,AAEL010223,AAEL010465,AAEL010640,AAEL010823,AAEL011703,AAEL012175,AAEL012359,AAEL012629,AAEL012731,AAEL012740,AAEL012825,AAEL013394,AAEL018132,AAEL018667,AAEL020429,AAEL024040,AAE…	24.2	4.47	5.89	9.85718e-16	2.51099e-14	9.54175e-13
GO:0046390	ribose phosphate biosynthetic process	65	25	AAEL002504,AAEL002813,AAEL002827,AAEL003393,AAEL003770,AAEL004060,AAEL004338,AAEL004423,AAEL005308,AAEL005610,AAEL006509,AAEL008848,AAEL009964,AAEL010640,AAEL010823,AAEL012175,AAEL012359,AAEL012731,AAEL012740,AAEL013394,AAEL018667,AAEL020429,AAEL024040,AAEL027199,AAEL027453,	38.5	7.09	11.32	1.18306e-15	2.86301e-14	1.1452e-12
GO:0009260	ribonucleotide biosynthetic process	65	25	AAEL002504,AAEL002813,AAEL002827,AAEL003393,AAEL003770,AAEL004060,AAEL004338,AAEL004423,AAEL005308,AAEL005610,AAEL006509,AAEL008848,AAEL009964,AAEL010640,AAEL010823,AAEL012175,AAEL012359,AAEL012731,AAEL012740,AAEL013394,AAEL018667,AAEL020429,AAEL024040,AAEL027199,AAEL027453,	38.5	7.09	11.32	1.18306e-15	2.86301e-14	1.1452e-12
GO:0022904	respiratory electron transport chain	21	15	AAEL000182,AAEL000986,AAEL001210,AAEL004829,AAEL005946,AAEL007868,AAEL009066,AAEL010230,AAEL010801,AAEL011157,AAEL012552,AAEL012950,AAEL014889,AAEL018658,AAEL018685,	71.4	13.17	44.67	3.51109e-15	8.19426e-14	3.39874e-12
GO:1901575	organic substance catabolic process	254	49	AAEL001030,AAEL002401,AAEL002508,AAEL002542,AAEL002779,AAEL003213,AAEL003246,AAEL003431,AAEL003466,AAEL003871,AAEL004308,AAEL004563,AAEL004653,AAEL005676,AAEL005766,AAEL005830,AAEL006056,AAEL006061,AAEL006070,AAEL006174,AAEL006441,AAEL006929,AAEL007039,AAEL008770,AAEL008841,AAEL009898,AAEL009968,AAEL010047,AAEL010087,AAEL010146,AAEL010496,AAEL010793,AAEL010854,AAEL011822,AAEL012095,AAEL012382,AAE…	19.3	3.56	4.45	3.55536e-15	8.19426e-14	3.44159e-12
GO:0042773	ATP synthesis coupled electron transport	18	14	AAEL000182,AAEL000986,AAEL001210,AAEL005946,AAEL007868,AAEL009066,AAEL010230,AAEL010801,AAEL011157,AAEL012552,AAEL012950,AAEL014889,AAEL018658,AAEL018685,	77.8	14.34	62.45	4.13436e-15	9.30712e-14	4.00206e-12
GO:0009056	catabolic process	276	50	AAEL001030,AAEL002401,AAEL002508,AAEL002542,AAEL002779,AAEL003213,AAEL003246,AAEL003431,AAEL003466,AAEL003871,AAEL004308,AAEL004563,AAEL004653,AAEL005676,AAEL005766,AAEL005830,AAEL006056,AAEL006061,AAEL006070,AAEL006174,AAEL006441,AAEL006929,AAEL007039,AAEL008770,AAEL008841,AAEL009898,AAEL009968,AAEL010047,AAEL010087,AAEL010146,AAEL010496,AAEL010793,AAEL010854,AAEL011314,AAEL011822,AAEL012095,AAE…	18.1	3.34	4.12	2.50677e-14	5.51489e-13	2.42655e-11
GO:1901565	organonitrogen compound catabolic process	146	35	AAEL002401,AAEL002508,AAEL003213,AAEL003431,AAEL003466,AAEL003871,AAEL004308,AAEL004563,AAEL004653,AAEL005676,AAEL005830,AAEL006056,AAEL006061,AAEL006174,AAEL006441,AAEL006929,AAEL007039,AAEL008770,AAEL009898,AAEL010087,AAEL010496,AAEL010793,AAEL010854,AAEL011822,AAEL012095,AAEL012629,AAEL012943,AAEL012974,AAEL013052,AAEL013236,AAEL013904,AAEL015007,AAEL017056,AAEL023069,AAEL025594,	24	4.42	5.77	4.25355e-14	9.14985e-13	4.11743e-11
GO:0006119	oxidative phosphorylation	20	14	AAEL000182,AAEL000986,AAEL001210,AAEL005946,AAEL007868,AAEL009066,AAEL010230,AAEL010801,AAEL011157,AAEL012552,AAEL012950,AAEL014889,AAEL018658,AAEL018685,	70	12.9	41.62	4.73141e-14	9.91792e-13	4.58e-11
GO:0042775	mitochondrial ATP synthesis coupled electron transport	14	12	AAEL000182,AAEL000986,AAEL001210,AAEL005946,AAEL007868,AAEL009066,AAEL010230,AAEL010801,AAEL012950,AAEL014889,AAEL018658,AAEL018685,	85.7	15.8	106.71	4.81552e-14	9.91792e-13	4.66142e-11
GO:0030163	protein catabolic process	88	27	AAEL002401,AAEL002508,AAEL003431,AAEL003466,AAEL003871,AAEL004308,AAEL004563,AAEL004653,AAEL005830,AAEL006056,AAEL006061,AAEL006174,AAEL006441,AAEL006929,AAEL008770,AAEL009898,AAEL010087,AAEL010496,AAEL010793,AAEL010854,AAEL012095,AAEL012943,AAEL013052,AAEL013236,AAEL015007,AAEL023069,AAEL025594,	30.7	5.66	8.03	5.61314e-14	1.13198e-12	5.43352e-11
GO:1901137	carbohydrate derivative biosynthetic process	168	37	AAEL000004,AAEL000654,AAEL001176,AAEL001670,AAEL002331,AAEL002465,AAEL002504,AAEL002813,AAEL002827,AAEL003393,AAEL003770,AAEL004060,AAEL004338,AAEL004423,AAEL004879,AAEL005308,AAEL005610,AAEL006438,AAEL006509,AAEL008848,AAEL009964,AAEL010465,AAEL010640,AAEL010823,AAEL012175,AAEL012359,AAEL012629,AAEL012731,AAEL012740,AAEL013394,AAEL018667,AAEL020429,AAEL021232,AAEL024040,AAEL024566,AAEL027199,AAE…	22	4.06	5.18	1.35539e-13	2.67759e-12	1.31202e-10
GO:0019646	aerobic electron transport chain	15	12	AAEL000182,AAEL000986,AAEL001210,AAEL005946,AAEL007868,AAEL009066,AAEL010230,AAEL010801,AAEL012950,AAEL014889,AAEL018658,AAEL018685,	80	14.75	71.13	2.28952e-13	4.4325e-12	2.21625e-10
GO:1901135	carbohydrate derivative metabolic process	333	52	AAEL000004,AAEL000654,AAEL001176,AAEL001670,AAEL002331,AAEL002465,AAEL002504,AAEL002542,AAEL002813,AAEL002827,AAEL003246,AAEL003393,AAEL003770,AAEL004060,AAEL004338,AAEL004423,AAEL004879,AAEL005308,AAEL005552,AAEL005610,AAEL005676,AAEL005766,AAEL006070,AAEL006438,AAEL006509,AAEL007039,AAEL008848,AAEL009311,AAEL009389,AAEL009964,AAEL010465,AAEL010505,AAEL010640,AAEL010823,AAEL011627,AAEL012175,AAE…	15.6	2.88	3.44	3.29547e-12	6.25494e-11	3.19002e-09
GO:0006099	tricarboxylic acid cycle	22	13	AAEL000454,AAEL000746,AAEL002764,AAEL005552,AAEL006833,AAEL008166,AAEL008167,AAEL008871,AAEL010330,AAEL010608,AAEL010814,AAEL011789,AAEL014505,	59.1	10.89	25.72	9.83006e-12	1.8299e-10	9.5155e-09
GO:1901566	organonitrogen compound biosynthetic process	499	65	AAEL000004,AAEL000654,AAEL000759,AAEL001100,AAEL001176,AAEL001670,AAEL001887,AAEL002304,AAEL002465,AAEL002504,AAEL002703,AAEL002813,AAEL002827,AAEL002898,AAEL003393,AAEL003762,AAEL003770,AAEL003835,AAEL003994,AAEL004060,AAEL004069,AAEL004338,AAEL004423,AAEL004879,AAEL005106,AAEL005308,AAEL005415,AAEL005610,AAEL005688,AAEL006438,AAEL006509,AAEL006693,AAEL007878,AAEL008169,AAEL008393,AAEL008848,AAE…	13	2.4	2.81	2.57951e-11	4.71125e-10	2.49696e-08
GO:0098662	inorganic cation transmembrane transport	151	31	AAEL000137,AAEL000291,AAEL002464,AAEL002504,AAEL002737,AAEL002813,AAEL002827,AAEL003234,AAEL003393,AAEL004060,AAEL004423,AAEL005170,AAEL005610,AAEL006509,AAEL006516,AAEL007752,AAEL008697,AAEL008848,AAEL009257,AAEL009964,AAEL010819,AAEL010823,AAEL012035,AAEL012113,AAEL012175,AAEL012740,AAEL014944,AAEL018667,AAEL019458,AAEL020429,AAEL024040,	20.5	3.78	4.69	9.14988e-11	1.6402e-09	8.85708e-08
GO:0009057	macromolecule catabolic process	134	29	AAEL002401,AAEL002508,AAEL003431,AAEL003466,AAEL003871,AAEL004308,AAEL004563,AAEL004653,AAEL005830,AAEL006056,AAEL006061,AAEL006174,AAEL006441,AAEL006929,AAEL007039,AAEL008770,AAEL009898,AAEL010087,AAEL010496,AAEL010793,AAEL010854,AAEL012095,AAEL012943,AAEL013052,AAEL013236,AAEL015007,AAEL017056,AAEL023069,AAEL025594,	21.6	3.99	5.01	9.79033e-11	1.7231e-09	9.47704e-08
GO:0098655	cation transmembrane transport	161	32	AAEL000137,AAEL000291,AAEL002436,AAEL002464,AAEL002504,AAEL002737,AAEL002813,AAEL002827,AAEL003234,AAEL003393,AAEL004060,AAEL004423,AAEL005170,AAEL005610,AAEL006509,AAEL006516,AAEL007752,AAEL008697,AAEL008848,AAEL009257,AAEL009964,AAEL010819,AAEL010823,AAEL012035,AAEL012113,AAEL012175,AAEL012740,AAEL014944,AAEL018667,AAEL019458,AAEL020429,AAEL024040,	19.9	3.66	4.51	1.10207e-10	1.90501e-09	1.06681e-07
GO:0009058	biosynthetic process	941	98	AAEL000004,AAEL000084,AAEL000654,AAEL000759,AAEL000999,AAEL001100,AAEL001176,AAEL001194,AAEL001204,AAEL001670,AAEL001887,AAEL002304,AAEL002331,AAEL002465,AAEL002504,AAEL002542,AAEL002703,AAEL002810,AAEL002813,AAEL002827,AAEL002898,AAEL003393,AAEL003666,AAEL003762,AAEL003770,AAEL003835,AAEL003994,AAEL004060,AAEL004069,AAEL004180,AAEL004221,AAEL004338,AAEL004423,AAEL004698,AAEL004879,AAEL005106,AAE…	10.4	1.92	2.23	1.14565e-10	1.94559e-09	1.10899e-07
GO:0051603	proteolysis involved in cellular protein catabolic process	80	22	AAEL002401,AAEL003431,AAEL003466,AAEL003871,AAEL004308,AAEL004563,AAEL004653,AAEL005830,AAEL006056,AAEL006061,AAEL006174,AAEL006441,AAEL006929,AAEL008770,AAEL009898,AAEL010087,AAEL010496,AAEL010793,AAEL010854,AAEL013052,AAEL013236,AAEL015007,	27.5	5.07	6.83	1.36809e-10	2.28329e-09	1.32431e-07
GO:0044257	cellular protein catabolic process	81	22	AAEL002401,AAEL003431,AAEL003466,AAEL003871,AAEL004308,AAEL004563,AAEL004653,AAEL005830,AAEL006056,AAEL006061,AAEL006174,AAEL006441,AAEL006929,AAEL008770,AAEL009898,AAEL010087,AAEL010496,AAEL010793,AAEL010854,AAEL013052,AAEL013236,AAEL015007,	27.2	5.01	6.71	1.78429e-10	2.92744e-09	1.72719e-07
GO:0044248	cellular catabolic process	212	37	AAEL001030,AAEL002401,AAEL003213,AAEL003246,AAEL003431,AAEL003466,AAEL003871,AAEL004308,AAEL004563,AAEL004653,AAEL005676,AAEL005830,AAEL006056,AAEL006061,AAEL006174,AAEL006441,AAEL006929,AAEL008770,AAEL008841,AAEL009898,AAEL009968,AAEL010047,AAEL010087,AAEL010146,AAEL010496,AAEL010793,AAEL010854,AAEL011314,AAEL011822,AAEL012382,AAEL012629,AAEL012974,AAEL013052,AAEL013236,AAEL013904,AAEL015007,AAE…	17.5	3.22	3.86	1.99731e-10	3.22233e-09	1.9334e-07
GO:0006796	phosphate-containing compound metabolic process	618	72	AAEL000004,AAEL000564,AAEL001100,AAEL001670,AAEL002465,AAEL002504,AAEL002542,AAEL002703,AAEL002779,AAEL002813,AAEL002827,AAEL003193,AAEL003230,AAEL003246,AAEL003363,AAEL003393,AAEL003770,AAEL004060,AAEL004338,AAEL004423,AAEL004970,AAEL005106,AAEL005308,AAEL005552,AAEL005610,AAEL005766,AAEL006070,AAEL006440,AAEL006509,AAEL006617,AAEL008393,AAEL008848,AAEL009185,AAEL009311,AAEL009389,AAEL009964,AAE…	11.7	2.15	2.48	3.7849e-10	6.0062e-09	3.66378e-07
GO:0006793	phosphorus metabolic process	622	72	AAEL000004,AAEL000564,AAEL001100,AAEL001670,AAEL002465,AAEL002504,AAEL002542,AAEL002703,AAEL002779,AAEL002813,AAEL002827,AAEL003193,AAEL003230,AAEL003246,AAEL003363,AAEL003393,AAEL003770,AAEL004060,AAEL004338,AAEL004423,AAEL004970,AAEL005106,AAEL005308,AAEL005552,AAEL005610,AAEL005766,AAEL006070,AAEL006440,AAEL006509,AAEL006617,AAEL008393,AAEL008848,AAEL009185,AAEL009311,AAEL009389,AAEL009964,AAE…	11.6	2.13	2.46	5.06167e-10	7.90274e-09	4.8997e-07
GO:0098660	inorganic ion transmembrane transport	171	32	AAEL000137,AAEL000291,AAEL001752,AAEL002464,AAEL002504,AAEL002737,AAEL002813,AAEL002827,AAEL003234,AAEL003393,AAEL004060,AAEL004423,AAEL005170,AAEL005610,AAEL006509,AAEL006516,AAEL007752,AAEL008697,AAEL008848,AAEL009257,AAEL009964,AAEL010819,AAEL010823,AAEL012035,AAEL012113,AAEL012175,AAEL012740,AAEL014944,AAEL018667,AAEL019458,AAEL020429,AAEL024040,	18.7	3.45	4.18	5.57329e-10	8.56341e-09	5.39495e-07
GO:0006120	mitochondrial electron transport, NADH to ubiquinone	9	8	AAEL000986,AAEL001210,AAEL005946,AAEL009066,AAEL010230,AAEL012950,AAEL014889,AAEL018658,	88.9	16.39	141.33	6.15169e-10	9.30443e-09	5.95483e-07
GO:1901576	organic substance biosynthetic process	905	93	AAEL000004,AAEL000084,AAEL000654,AAEL000759,AAEL000999,AAEL001100,AAEL001176,AAEL001204,AAEL001670,AAEL001887,AAEL002304,AAEL002331,AAEL002465,AAEL002504,AAEL002542,AAEL002703,AAEL002810,AAEL002813,AAEL002827,AAEL002898,AAEL003393,AAEL003666,AAEL003762,AAEL003770,AAEL003835,AAEL003994,AAEL004060,AAEL004069,AAEL004180,AAEL004221,AAEL004338,AAEL004423,AAEL004698,AAEL004879,AAEL005106,AAEL005308,AAE…	10.3	1.89	2.18	7.5967e-10	1.13132e-08	7.35361e-07
GO:0008150	biological process	5926	393	AAEL000004,AAEL000084,AAEL000137,AAEL000182,AAEL000246,AAEL000291,AAEL000424,AAEL000433,AAEL000434,AAEL000454,AAEL000564,AAEL000654,AAEL000746,AAEL000753,AAEL000759,AAEL000839,AAEL000934,AAEL000941,AAEL000986,AAEL000999,AAEL001030,AAEL001100,AAEL001109,AAEL001134,AAEL001142,AAEL001164,AAEL001176,AAEL001194,AAEL001204,AAEL001210,AAEL001501,AAEL001588,AAEL001649,AAEL001670,AAEL001710,AAEL001737,AAE…	6.6	1.22	1.69	8.52955e-10	1.251e-08	8.2566e-07
GO:0044249	cellular biosynthetic process	876	89	AAEL000004,AAEL000084,AAEL000654,AAEL000759,AAEL000999,AAEL001100,AAEL001176,AAEL001204,AAEL001670,AAEL001887,AAEL002304,AAEL002331,AAEL002465,AAEL002504,AAEL002703,AAEL002810,AAEL002813,AAEL002827,AAEL002898,AAEL003393,AAEL003666,AAEL003762,AAEL003770,AAEL003835,AAEL003994,AAEL004060,AAEL004069,AAEL004180,AAEL004221,AAEL004338,AAEL004423,AAEL004698,AAEL004879,AAEL005106,AAEL005308,AAEL005415,AAE…	10.2	1.87	2.14	3.31867e-09	4.79473e-08	3.21247e-06
GO:0006812	cation transport	199	33	AAEL000137,AAEL000291,AAEL002436,AAEL002464,AAEL002504,AAEL002737,AAEL002813,AAEL002827,AAEL003234,AAEL003393,AAEL004060,AAEL004423,AAEL005170,AAEL005610,AAEL006509,AAEL006516,AAEL007752,AAEL008697,AAEL008848,AAEL009257,AAEL009964,AAEL010819,AAEL010823,AAEL012035,AAEL012113,AAEL012175,AAEL012740,AAEL013490,AAEL014944,AAEL018667,AAEL019458,AAEL020429,AAEL024040,	16.6	3.06	3.61	7.3897e-09	1.05195e-07	7.15323e-06
GO:0071704	organic substance metabolic process	3037	227	AAEL000004,AAEL000084,AAEL000424,AAEL000564,AAEL000654,AAEL000746,AAEL000759,AAEL000839,AAEL000999,AAEL001030,AAEL001100,AAEL001134,AAEL001176,AAEL001204,AAEL001588,AAEL001649,AAEL001670,AAEL001737,AAEL001747,AAEL001887,AAEL002304,AAEL002331,AAEL002401,AAEL002465,AAEL002504,AAEL002508,AAEL002542,AAEL002703,AAEL002779,AAEL002789,AAEL002810,AAEL002813,AAEL002827,AAEL002898,AAEL003213,AAEL003230,AAE…	7.5	1.38	1.66	8.75498e-09	1.22824e-07	8.47482e-06
GO:0019752	carboxylic acid metabolic process	207	33	AAEL000746,AAEL001100,AAEL001134,AAEL001887,AAEL002542,AAEL003666,AAEL003746,AAEL003994,AAEL004294,AAEL004338,AAEL005308,AAEL005688,AAEL005766,AAEL006070,AAEL008166,AAEL008167,AAEL008841,AAEL009691,AAEL010047,AAEL010146,AAEL010464,AAEL010611,AAEL011789,AAEL012579,AAEL012674,AAEL012974,AAEL013904,AAEL016984,AAEL024228,AAEL024412,AAEL025993,AAEL026440,AAEL027594,	15.9	2.94	3.44	2.01703e-08	2.78927e-07	1.95249e-05
GO:0043436	oxoacid metabolic process	208	33	AAEL000746,AAEL001100,AAEL001134,AAEL001887,AAEL002542,AAEL003666,AAEL003746,AAEL003994,AAEL004294,AAEL004338,AAEL005308,AAEL005688,AAEL005766,AAEL006070,AAEL008166,AAEL008167,AAEL008841,AAEL009691,AAEL010047,AAEL010146,AAEL010464,AAEL010611,AAEL011789,AAEL012579,AAEL012674,AAEL012974,AAEL013904,AAEL016984,AAEL024228,AAEL024412,AAEL025993,AAEL026440,AAEL027594,	15.9	2.92	3.42	2.27718e-08	3.10466e-07	2.20431e-05
GO:0006082	organic acid metabolic process	210	33	AAEL000746,AAEL001100,AAEL001134,AAEL001887,AAEL002542,AAEL003666,AAEL003746,AAEL003994,AAEL004294,AAEL004338,AAEL005308,AAEL005688,AAEL005766,AAEL006070,AAEL008166,AAEL008167,AAEL008841,AAEL009691,AAEL010047,AAEL010146,AAEL010464,AAEL010611,AAEL011789,AAEL012579,AAEL012674,AAEL012974,AAEL013904,AAEL016984,AAEL024228,AAEL024412,AAEL025993,AAEL026440,AAEL027594,	15.7	2.9	3.38	2.89463e-08	3.89167e-07	2.802e-05
GO:1901564	organonitrogen compound metabolic process	1948	157	AAEL000004,AAEL000424,AAEL000564,AAEL000654,AAEL000759,AAEL001100,AAEL001134,AAEL001176,AAEL001588,AAEL001649,AAEL001670,AAEL001887,AAEL002304,AAEL002401,AAEL002465,AAEL002504,AAEL002508,AAEL002542,AAEL002703,AAEL002789,AAEL002813,AAEL002827,AAEL002898,AAEL003213,AAEL003230,AAEL003393,AAEL003431,AAEL003466,AAEL003666,AAEL003742,AAEL003762,AAEL003770,AAEL003835,AAEL003871,AAEL003994,AAEL004060,AAE…	8.1	1.49	1.71	4.77221e-08	6.32809e-07	4.6195e-05
GO:0006511	ubiquitin-dependent protein catabolic process	74	18	AAEL003466,AAEL003871,AAEL004308,AAEL004563,AAEL004653,AAEL005830,AAEL006056,AAEL006061,AAEL006174,AAEL006441,AAEL006929,AAEL009898,AAEL010087,AAEL010496,AAEL010793,AAEL010854,AAEL013052,AAEL015007,	24.3	4.48	5.75	5.39088e-08	7.05186e-07	5.21837e-05
GO:0044238	primary metabolic process	2834	211	AAEL000004,AAEL000084,AAEL000424,AAEL000454,AAEL000564,AAEL000654,AAEL000746,AAEL000839,AAEL000999,AAEL001100,AAEL001134,AAEL001176,AAEL001204,AAEL001588,AAEL001649,AAEL001670,AAEL001737,AAEL001747,AAEL001887,AAEL002331,AAEL002401,AAEL002465,AAEL002504,AAEL002508,AAEL002542,AAEL002764,AAEL002779,AAEL002789,AAEL002810,AAEL002813,AAEL002827,AAEL003213,AAEL003230,AAEL003246,AAEL003363,AAEL003393,AAE…	7.4	1.37	1.62	6.17983e-08	7.9761e-07	5.98207e-05
GO:0006090	pyruvate metabolic process	17	9	AAEL002542,AAEL004294,AAEL004338,AAEL005308,AAEL005766,AAEL006070,AAEL009691,AAEL016984,AAEL024228,	52.9	9.76	19.9	6.30227e-08	8.0271e-07	6.1006e-05
GO:0019438	aromatic compound biosynthetic process	329	43	AAEL000084,AAEL001176,AAEL002304,AAEL002331,AAEL002504,AAEL002703,AAEL002813,AAEL002827,AAEL002898,AAEL003393,AAEL003762,AAEL003770,AAEL004060,AAEL004338,AAEL004423,AAEL004698,AAEL005106,AAEL005308,AAEL005415,AAEL005610,AAEL005742,AAEL006509,AAEL006693,AAEL008848,AAEL009964,AAEL010640,AAEL010823,AAEL011703,AAEL012175,AAEL012359,AAEL012629,AAEL012731,AAEL012740,AAEL012825,AAEL013394,AAEL017566,AAE…	13.1	2.41	2.75	6.50774e-08	8.18115e-07	6.29949e-05
GO:0019941	modification-dependent protein catabolic process	75	18	AAEL003466,AAEL003871,AAEL004308,AAEL004563,AAEL004653,AAEL005830,AAEL006056,AAEL006061,AAEL006174,AAEL006441,AAEL006929,AAEL009898,AAEL010087,AAEL010496,AAEL010793,AAEL010854,AAEL013052,AAEL015007,	24	4.42	5.64	6.7407e-08	8.36539e-07	6.525e-05
GO:0043632	modification-dependent macromolecule catabolic process	76	18	AAEL003466,AAEL003871,AAEL004308,AAEL004563,AAEL004653,AAEL005830,AAEL006056,AAEL006061,AAEL006174,AAEL006441,AAEL006929,AAEL009898,AAEL010087,AAEL010496,AAEL010793,AAEL010854,AAEL013052,AAEL015007,	23.7	4.37	5.55	8.39368e-08	1.02849e-06	8.12508e-05
GO:1901362	organic cyclic compound biosynthetic process	348	44	AAEL000084,AAEL001176,AAEL002304,AAEL002331,AAEL002504,AAEL002703,AAEL002813,AAEL002827,AAEL002898,AAEL003393,AAEL003762,AAEL003770,AAEL004060,AAEL004338,AAEL004423,AAEL004698,AAEL005106,AAEL005308,AAEL005415,AAEL005610,AAEL005742,AAEL006509,AAEL006693,AAEL008848,AAEL009964,AAEL010640,AAEL010823,AAEL011703,AAEL012175,AAEL012359,AAEL012629,AAEL012731,AAEL012740,AAEL012825,AAEL013394,AAEL013814,AAE…	12.6	2.33	2.64	1.20781e-07	1.46145e-06	0.000116916
GO:0018130	heterocycle biosynthetic process	339	43	AAEL000084,AAEL001176,AAEL002304,AAEL002331,AAEL002504,AAEL002703,AAEL002813,AAEL002827,AAEL002898,AAEL003393,AAEL003762,AAEL003770,AAEL004060,AAEL004338,AAEL004423,AAEL004698,AAEL005106,AAEL005308,AAEL005415,AAEL005610,AAEL005742,AAEL006509,AAEL006693,AAEL008848,AAEL009964,AAEL010640,AAEL010823,AAEL011703,AAEL012175,AAEL012359,AAEL012629,AAEL012731,AAEL012740,AAEL012825,AAEL013394,AAEL017566,AAE…	12.7	2.34	2.65	1.54096e-07	1.84155e-06	0.000149165
GO:0042176	regulation of protein catabolic process	7	6	AAEL002906,AAEL006315,AAEL012095,AAEL012122,AAEL012943,AAEL025594,	85.7	15.8	105.64	1.66225e-07	1.96227e-06	0.000160906
GO:0034220	ion transmembrane transport	252	35	AAEL000137,AAEL000291,AAEL001752,AAEL002436,AAEL002464,AAEL002504,AAEL002737,AAEL002813,AAEL002827,AAEL003234,AAEL003393,AAEL004060,AAEL004423,AAEL005170,AAEL005610,AAEL006509,AAEL006516,AAEL007752,AAEL008697,AAEL008848,AAEL009257,AAEL009964,AAEL010819,AAEL010823,AAEL012035,AAEL012113,AAEL012175,AAEL012740,AAEL014944,AAEL018667,AAEL019458,AAEL020429,AAEL022304,AAEL023176,AAEL024040,	13.9	2.56	2.92	2.57927e-07	3.00811e-06	0.000249673
GO:0044265	cellular macromolecule catabolic process	118	22	AAEL002401,AAEL003431,AAEL003466,AAEL003871,AAEL004308,AAEL004563,AAEL004653,AAEL005830,AAEL006056,AAEL006061,AAEL006174,AAEL006441,AAEL006929,AAEL008770,AAEL009898,AAEL010087,AAEL010496,AAEL010793,AAEL010854,AAEL013052,AAEL013236,AAEL015007,	18.6	3.44	4.11	3.0266e-07	3.4878e-06	0.000292975
GO:0055085	transmembrane transport	570	59	AAEL000137,AAEL000291,AAEL000434,AAEL001752,AAEL002436,AAEL002464,AAEL002504,AAEL002737,AAEL002813,AAEL002827,AAEL003192,AAEL003234,AAEL003285,AAEL003393,AAEL003524,AAEL004060,AAEL004124,AAEL004423,AAEL005008,AAEL005043,AAEL005170,AAEL005610,AAEL005678,AAEL005918,AAEL006509,AAEL006516,AAEL006717,AAEL006800,AAEL006855,AAEL007752,AAEL008232,AAEL008697,AAEL008848,AAEL009257,AAEL009590,AAEL009808,AAE…	10.4	1.91	2.12	1.04449e-06	1.18949e-05	0.00101106
GO:0010035	response to inorganic substance	9	6	AAEL004823,AAEL008216,AAEL012710,AAEL019937,AAEL019938,AAEL025388,	66.7	12.29	35.21	1.81543e-06	2.04341e-05	0.00175733
GO:0032787	monocarboxylic acid metabolic process	67	15	AAEL002542,AAEL003746,AAEL004294,AAEL004338,AAEL005308,AAEL005766,AAEL006070,AAEL008841,AAEL009691,AAEL010047,AAEL010146,AAEL010611,AAEL016984,AAEL024228,AAEL027594,	22.4	4.13	5.13	2.16989e-06	2.41431e-05	0.00210045
GO:0006725	cellular aromatic compound metabolic process	884	80	AAEL000084,AAEL000999,AAEL001134,AAEL001176,AAEL002304,AAEL002331,AAEL002504,AAEL002542,AAEL002703,AAEL002810,AAEL002813,AAEL002827,AAEL002898,AAEL003213,AAEL003246,AAEL003393,AAEL003492,AAEL003684,AAEL003762,AAEL003770,AAEL003893,AAEL003994,AAEL004060,AAEL004338,AAEL004423,AAEL004562,AAEL004698,AAEL005106,AAEL005308,AAEL005415,AAEL005552,AAEL005610,AAEL005676,AAEL005688,AAEL005742,AAEL005766,AAE…	9	1.67	1.85	2.86441e-06	3.15085e-05	0.00277275
GO:0046129	purine ribonucleoside biosynthetic process	10	6	AAEL001176,AAEL002827,AAEL003393,AAEL006509,AAEL008848,AAEL012175,	60	11.06	26.4	4.3301e-06	4.7096e-05	0.00419154
GO:0046483	heterocycle metabolic process	882	79	AAEL000084,AAEL000999,AAEL001134,AAEL001176,AAEL002304,AAEL002331,AAEL002504,AAEL002542,AAEL002703,AAEL002810,AAEL002813,AAEL002827,AAEL002898,AAEL003213,AAEL003246,AAEL003393,AAEL003492,AAEL003684,AAEL003762,AAEL003770,AAEL003893,AAEL003994,AAEL004060,AAEL004338,AAEL004423,AAEL004562,AAEL004698,AAEL005106,AAEL005308,AAEL005415,AAEL005552,AAEL005610,AAEL005676,AAEL005688,AAEL005742,AAEL005766,AAE…	9	1.65	1.82	4.92669e-06	5.29892e-05	0.00476903
GO:0009132	nucleoside diphosphate metabolic process	20	8	AAEL002542,AAEL005766,AAEL006070,AAEL012359,AAEL012731,AAEL016984,AAEL024228,AAEL027453,	40	7.37	11.77	5.04386e-06	5.36534e-05	0.00488246
GO:1901360	organic cyclic compound metabolic process	899	80	AAEL000084,AAEL000999,AAEL001134,AAEL001176,AAEL002304,AAEL002331,AAEL002504,AAEL002542,AAEL002703,AAEL002810,AAEL002813,AAEL002827,AAEL002898,AAEL003213,AAEL003246,AAEL003393,AAEL003492,AAEL003684,AAEL003762,AAEL003770,AAEL003893,AAEL003994,AAEL004060,AAEL004338,AAEL004423,AAEL004562,AAEL004698,AAEL005106,AAEL005308,AAEL005415,AAEL005552,AAEL005610,AAEL005676,AAEL005688,AAEL005742,AAEL005766,AAE…	8.9	1.64	1.81	5.45407e-06	5.73862e-05	0.00527953
GO:0006122	mitochondrial electron transport, ubiquinol to cytochrome c	4	4	AAEL000182,AAEL007868,AAEL010801,AAEL018685,	100	18.43	inf	8.57949e-06	8.93005e-05	0.00830495
GO:0006165	nucleoside diphosphate phosphorylation	16	7	AAEL002542,AAEL005766,AAEL006070,AAEL012359,AAEL016984,AAEL024228,AAEL027453,	43.8	8.06	13.71	9.94015e-06	0.000101285	0.00962206
GO:0046939	nucleotide phosphorylation	16	7	AAEL002542,AAEL005766,AAEL006070,AAEL012359,AAEL016984,AAEL024228,AAEL027453,	43.8	8.06	13.71	9.94015e-06	0.000101285	0.00962206
GO:0006807	nitrogen compound metabolic process	2601	185	AAEL000004,AAEL000084,AAEL000424,AAEL000564,AAEL000654,AAEL000759,AAEL000999,AAEL001100,AAEL001134,AAEL001176,AAEL001588,AAEL001649,AAEL001670,AAEL001887,AAEL002304,AAEL002331,AAEL002401,AAEL002465,AAEL002504,AAEL002508,AAEL002542,AAEL002703,AAEL002789,AAEL002810,AAEL002813,AAEL002827,AAEL002898,AAEL003213,AAEL003230,AAEL003246,AAEL003393,AAEL003431,AAEL003466,AAEL003492,AAEL003666,AAEL003684,AAE…	7.1	1.31	1.48	1.4811e-05	0.000149345	0.0143371
GO:0009168	purine ribonucleoside monophosphate biosynthetic process	17	7	AAEL002827,AAEL003393,AAEL006509,AAEL008848,AAEL010640,AAEL012175,AAEL027199,	41.2	7.59	12.34	1.61102e-05	0.00016077	0.0155946
GO:0034654	nucleobase-containing compound biosynthetic process	302	35	AAEL000084,AAEL001176,AAEL002331,AAEL002504,AAEL002813,AAEL002827,AAEL003393,AAEL003770,AAEL004060,AAEL004338,AAEL004423,AAEL004698,AAEL005106,AAEL005308,AAEL005610,AAEL005742,AAEL006509,AAEL008848,AAEL009964,AAEL010640,AAEL010823,AAEL011703,AAEL012175,AAEL012359,AAEL012629,AAEL012731,AAEL012740,AAEL012825,AAEL013394,AAEL017566,AAEL018667,AAEL020429,AAEL024040,AAEL027199,AAEL027453,	11.6	2.14	2.36	1.70219e-05	0.000164606	0.0164772
GO:0034032	purine nucleoside bisphosphate metabolic process	12	6	AAEL003770,AAEL004338,AAEL005308,AAEL005552,AAEL009311,AAEL013394,	50	9.22	17.6	1.73449e-05	0.000164606	0.0167898
GO:0006270	DNA replication initiation	12	6	AAEL000999,AAEL002810,AAEL007007,AAEL010086,AAEL011811,AAEL012546,	50	9.22	17.6	1.73449e-05	0.000164606	0.0167898
GO:0033865	nucleoside bisphosphate metabolic process	12	6	AAEL003770,AAEL004338,AAEL005308,AAEL005552,AAEL009311,AAEL013394,	50	9.22	17.6	1.73449e-05	0.000164606	0.0167898
GO:0033875	ribonucleoside bisphosphate metabolic process	12	6	AAEL003770,AAEL004338,AAEL005308,AAEL005552,AAEL009311,AAEL013394,	50	9.22	17.6	1.73449e-05	0.000164606	0.0167898
GO:0006261	DNA-dependent DNA replication	24	8	AAEL000999,AAEL002810,AAEL004698,AAEL006080,AAEL007007,AAEL010086,AAEL011811,AAEL012546,	33.3	6.14	8.82	2.42656e-05	0.000228049	0.0234891
GO:0006811	ion transport	322	36	AAEL000137,AAEL000291,AAEL001752,AAEL002436,AAEL002464,AAEL002504,AAEL002737,AAEL002813,AAEL002827,AAEL003234,AAEL003393,AAEL004060,AAEL004423,AAEL005170,AAEL005610,AAEL006509,AAEL006516,AAEL007752,AAEL008697,AAEL008848,AAEL009257,AAEL009964,AAEL010819,AAEL010823,AAEL012035,AAEL012113,AAEL012175,AAEL012740,AAEL013490,AAEL014944,AAEL018667,AAEL019458,AAEL020429,AAEL022304,AAEL023176,AAEL024040,	11.2	2.06	2.27	2.83521e-05	0.000263892	0.0274448
GO:0044271	cellular nitrogen compound biosynthetic process	592	56	AAEL000084,AAEL000759,AAEL001176,AAEL002304,AAEL002331,AAEL002504,AAEL002703,AAEL002813,AAEL002827,AAEL002898,AAEL003393,AAEL003762,AAEL003770,AAEL003835,AAEL003994,AAEL004060,AAEL004069,AAEL004338,AAEL004423,AAEL004698,AAEL005106,AAEL005308,AAEL005415,AAEL005610,AAEL005688,AAEL005742,AAEL006509,AAEL006693,AAEL007878,AAEL008169,AAEL008848,AAEL009964,AAEL010640,AAEL010823,AAEL011703,AAEL012175,AAE…	9.5	1.74	1.91	2.93033e-05	0.000270149	0.0283656
GO:0046128	purine ribonucleoside metabolic process	14	6	AAEL001176,AAEL002827,AAEL003393,AAEL005676,AAEL012175,AAEL012731,	42.9	7.9	13.2	5.13282e-05	0.000464352	0.0496857
GO:0046031	ADP metabolic process	14	6	AAEL002542,AAEL005766,AAEL006070,AAEL012731,AAEL016984,AAEL024228,	42.9	7.9	13.2	5.13282e-05	0.000464352	0.0496857
GO:0006139	nucleobase-containing compound metabolic process	841	72	AAEL000084,AAEL000999,AAEL001134,AAEL001176,AAEL002331,AAEL002504,AAEL002542,AAEL002810,AAEL002813,AAEL002827,AAEL003213,AAEL003246,AAEL003393,AAEL003492,AAEL003684,AAEL003770,AAEL003893,AAEL003994,AAEL004060,AAEL004338,AAEL004423,AAEL004562,AAEL004698,AAEL005106,AAEL005308,AAEL005552,AAEL005610,AAEL005676,AAEL005688,AAEL005742,AAEL005766,AAEL006070,AAEL006080,AAEL006209,AAEL006509,AAEL006688,AAE…	8.6	1.58	1.72	6.05942e-05	0.000541437	0.0586552
GO:0034641	cellular nitrogen compound metabolic process	1114	90	AAEL000084,AAEL000759,AAEL000999,AAEL001134,AAEL001176,AAEL002304,AAEL002331,AAEL002504,AAEL002542,AAEL002703,AAEL002810,AAEL002813,AAEL002827,AAEL002898,AAEL003213,AAEL003246,AAEL003393,AAEL003492,AAEL003684,AAEL003762,AAEL003770,AAEL003835,AAEL003893,AAEL003994,AAEL004060,AAEL004069,AAEL004338,AAEL004423,AAEL004562,AAEL004698,AAEL005106,AAEL005308,AAEL005415,AAEL005552,AAEL005610,AAEL005676,AAE…	8.1	1.49	1.63	6.09676e-05	0.000541437	0.0590166
GO:0009135	purine nucleoside diphosphate metabolic process	15	6	AAEL002542,AAEL005766,AAEL006070,AAEL012731,AAEL016984,AAEL024228,	40	7.37	11.73	8.16369e-05	0.000705576	0.0790245
GO:0009185	ribonucleoside diphosphate metabolic process	15	6	AAEL002542,AAEL005766,AAEL006070,AAEL012731,AAEL016984,AAEL024228,	40	7.37	11.73	8.16369e-05	0.000705576	0.0790245
GO:0009179	purine ribonucleoside diphosphate metabolic process	15	6	AAEL002542,AAEL005766,AAEL006070,AAEL012731,AAEL016984,AAEL024228,	40	7.37	11.73	8.16369e-05	0.000705576	0.0790245
GO:0034614	cellular response to reactive oxygen species	6	4	AAEL004823,AAEL019937,AAEL019938,AAEL025388,	66.7	12.29	35.09	0.000117841	0.000958574	0.11407
GO:0019430	removal of superoxide radicals	6	4	AAEL004823,AAEL019937,AAEL019938,AAEL025388,	66.7	12.29	35.09	0.000117841	0.000958574	0.11407
GO:0000303	response to superoxide	6	4	AAEL004823,AAEL019937,AAEL019938,AAEL025388,	66.7	12.29	35.09	0.000117841	0.000958574	0.11407
GO:0000302	response to reactive oxygen species	6	4	AAEL004823,AAEL019937,AAEL019938,AAEL025388,	66.7	12.29	35.09	0.000117841	0.000958574	0.11407
GO:0071450	cellular response to oxygen radical	6	4	AAEL004823,AAEL019937,AAEL019938,AAEL025388,	66.7	12.29	35.09	0.000117841	0.000958574	0.11407
GO:0071451	cellular response to superoxide	6	4	AAEL004823,AAEL019937,AAEL019938,AAEL025388,	66.7	12.29	35.09	0.000117841	0.000958574	0.11407
GO:0000305	response to oxygen radical	6	4	AAEL004823,AAEL019937,AAEL019938,AAEL025388,	66.7	12.29	35.09	0.000117841	0.000958574	0.11407
GO:0051179	localization	996	81	AAEL000137,AAEL000291,AAEL000434,AAEL000934,AAEL000941,AAEL001710,AAEL001752,AAEL002436,AAEL002464,AAEL002504,AAEL002737,AAEL002813,AAEL002827,AAEL003192,AAEL003234,AAEL003285,AAEL003393,AAEL003524,AAEL003670,AAEL003923,AAEL004060,AAEL004124,AAEL004423,AAEL004497,AAEL005008,AAEL005043,AAEL005170,AAEL005353,AAEL005610,AAEL005678,AAEL005918,AAEL006509,AAEL006516,AAEL006717,AAEL006718,AAEL006800,AAE…	8.1	1.5	1.63	0.000119634	0.000965046	0.115806
GO:0046148	pigment biosynthetic process	16	6	AAEL003762,AAEL005415,AAEL006693,AAEL010640,AAEL024350,AAEL026393,	37.5	6.91	10.56	0.000124655	0.00099724	0.120666
GO:1901800	positive regulation of proteasomal protein catabolic process	3	3	AAEL012095,AAEL012943,AAEL025594,	100	18.43	inf	0.0001589	0.00122075	0.153815
GO:0032780	negative regulation of ATP-dependent activity	3	3	AAEL003417,AAEL004284,AAEL007007,	100	18.43	inf	0.0001589	0.00122075	0.153815
GO:1903364	positive regulation of cellular protein catabolic process	3	3	AAEL012095,AAEL012943,AAEL025594,	100	18.43	inf	0.0001589	0.00122075	0.153815
GO:1903052	positive regulation of proteolysis involved in cellular protein catabolic process	3	3	AAEL012095,AAEL012943,AAEL025594,	100	18.43	inf	0.0001589	0.00122075	0.153815
GO:0045732	positive regulation of protein catabolic process	3	3	AAEL012095,AAEL012943,AAEL025594,	100	18.43	inf	0.0001589	0.00122075	0.153815
GO:0006779	porphyrin-containing compound biosynthetic process	11	5	AAEL002304,AAEL003762,AAEL005415,AAEL006693,AAEL024350,	45.5	8.38	14.64	0.000162395	0.00123778	0.157198
GO:0051234	establishment of localization	977	79	AAEL000137,AAEL000291,AAEL000434,AAEL000934,AAEL000941,AAEL001752,AAEL002436,AAEL002464,AAEL002504,AAEL002737,AAEL002813,AAEL002827,AAEL003192,AAEL003234,AAEL003285,AAEL003393,AAEL003524,AAEL003670,AAEL003923,AAEL004060,AAEL004124,AAEL004423,AAEL004497,AAEL005008,AAEL005043,AAEL005170,AAEL005353,AAEL005610,AAEL005678,AAEL005918,AAEL006509,AAEL006516,AAEL006717,AAEL006718,AAEL006800,AAEL006855,AAE…	8.1	1.49	1.61	0.000176266	0.00133301	0.170626
GO:0016052	carbohydrate catabolic process	17	6	AAEL002542,AAEL002779,AAEL005766,AAEL006070,AAEL016984,AAEL024228,	35.3	6.51	9.59	0.000183861	0.00136906	0.177978
GO:0042440	pigment metabolic process	17	6	AAEL003762,AAEL005415,AAEL006693,AAEL010640,AAEL024350,AAEL026393,	35.3	6.51	9.59	0.000183861	0.00136906	0.177978
GO:0006810	transport	968	78	AAEL000137,AAEL000291,AAEL000434,AAEL000934,AAEL000941,AAEL001752,AAEL002436,AAEL002464,AAEL002504,AAEL002737,AAEL002813,AAEL002827,AAEL003192,AAEL003234,AAEL003285,AAEL003393,AAEL003524,AAEL003670,AAEL003923,AAEL004060,AAEL004124,AAEL004423,AAEL004497,AAEL005008,AAEL005043,AAEL005170,AAEL005353,AAEL005610,AAEL005678,AAEL005918,AAEL006509,AAEL006516,AAEL006717,AAEL006718,AAEL006800,AAEL006855,AAE…	8.1	1.49	1.61	0.000217134	0.00160447	0.210186
GO:0034599	cellular response to oxidative stress	7	4	AAEL004823,AAEL019937,AAEL019938,AAEL025388,	57.1	10.53	23.39	0.000263148	0.00187949	0.254727
GO:0043462	regulation of ATP-dependent activity	7	4	AAEL003417,AAEL004284,AAEL004465,AAEL007007,	57.1	10.53	23.39	0.000263148	0.00187949	0.254727
GO:0006757	ATP generation from ADP	12	5	AAEL002542,AAEL005766,AAEL006070,AAEL016984,AAEL024228,	41.7	7.68	12.55	0.000266002	0.00187949	0.25749
GO:0033014	tetrapyrrole biosynthetic process	12	5	AAEL002304,AAEL003762,AAEL005415,AAEL006693,AAEL024350,	41.7	7.68	12.55	0.000266002	0.00187949	0.25749
GO:0006778	porphyrin-containing compound metabolic process	12	5	AAEL002304,AAEL003762,AAEL005415,AAEL006693,AAEL024350,	41.7	7.68	12.55	0.000266002	0.00187949	0.25749
GO:0006096	glycolytic process	12	5	AAEL002542,AAEL005766,AAEL006070,AAEL016984,AAEL024228,	41.7	7.68	12.55	0.000266002	0.00187949	0.25749
GO:0044283	small molecule biosynthetic process	99	15	AAEL001100,AAEL001176,AAEL001887,AAEL002542,AAEL002703,AAEL002898,AAEL003666,AAEL004180,AAEL008330,AAEL009691,AAEL010611,AAEL011379,AAEL013814,AAEL025993,AAEL027594,	15.2	2.79	3.17	0.00026988	0.00189307	0.261244
GO:0032508	DNA duplex unwinding	26	7	AAEL000999,AAEL002810,AAEL003684,AAEL007007,AAEL010086,AAEL011811,AAEL012546,	26.9	4.96	6.49	0.000355141	0.00245555	0.343777
GO:0032392	DNA geometric change	26	7	AAEL000999,AAEL002810,AAEL003684,AAEL007007,AAEL010086,AAEL011811,AAEL012546,	26.9	4.96	6.49	0.000355141	0.00245555	0.343777
GO:0033013	tetrapyrrole metabolic process	13	5	AAEL002304,AAEL003762,AAEL005415,AAEL006693,AAEL024350,	38.5	7.09	10.98	0.000413042	0.00283564	0.399825
GO:0009167	purine ribonucleoside monophosphate metabolic process	20	6	AAEL002827,AAEL003393,AAEL010640,AAEL012175,AAEL012731,AAEL027199,	30	5.53	7.54	0.000500721	0.00327251	0.484698
GO:0034033	purine nucleoside bisphosphate biosynthetic process	8	4	AAEL003770,AAEL004338,AAEL005308,AAEL013394,	50	9.22	17.54	0.000503722	0.00327251	0.487603
GO:0006783	heme biosynthetic process	8	4	AAEL003762,AAEL005415,AAEL006693,AAEL024350,	50	9.22	17.54	0.000503722	0.00327251	0.487603
GO:0006739	NADP metabolic process	8	4	AAEL009389,AAEL010505,AAEL011627,AAEL011703,	50	9.22	17.54	0.000503722	0.00327251	0.487603
GO:0033866	nucleoside bisphosphate biosynthetic process	8	4	AAEL003770,AAEL004338,AAEL005308,AAEL013394,	50	9.22	17.54	0.000503722	0.00327251	0.487603
GO:0062197	cellular response to chemical stress	8	4	AAEL004823,AAEL019937,AAEL019938,AAEL025388,	50	9.22	17.54	0.000503722	0.00327251	0.487603
GO:0043248	proteasome assembly	8	4	AAEL007351,AAEL011059,AAEL014555,AAEL021316,	50	9.22	17.54	0.000503722	0.00327251	0.487603
GO:0034030	ribonucleoside bisphosphate biosynthetic process	8	4	AAEL003770,AAEL004338,AAEL005308,AAEL013394,	50	9.22	17.54	0.000503722	0.00327251	0.487603
GO:0000413	protein peptidyl-prolyl isomerization	28	7	AAEL004313,AAEL007883,AAEL008367,AAEL011758,AAEL012272,AAEL013279,AAEL025082,	25	4.61	5.87	0.000581502	0.00375262	0.562894
GO:0044282	small molecule catabolic process	45	9	AAEL001030,AAEL002779,AAEL005676,AAEL008841,AAEL010047,AAEL010146,AAEL012974,AAEL013904,AAEL019780,	20	3.69	4.41	0.000585743	0.00375496	0.567
GO:1903362	regulation of cellular protein catabolic process	4	3	AAEL012095,AAEL012943,AAEL025594,	75	13.83	52.56	0.00060986	0.00380867	0.590345
GO:0015936	coenzyme A metabolic process	4	3	AAEL003770,AAEL009311,AAEL013394,	75	13.83	52.56	0.00060986	0.00380867	0.590345
GO:0061136	regulation of proteasomal protein catabolic process	4	3	AAEL012095,AAEL012943,AAEL025594,	75	13.83	52.56	0.00060986	0.00380867	0.590345
GO:1903050	regulation of proteolysis involved in cellular protein catabolic process	4	3	AAEL012095,AAEL012943,AAEL025594,	75	13.83	52.56	0.00060986	0.00380867	0.590345
GO:0009894	regulation of catabolic process	21	6	AAEL002906,AAEL006315,AAEL012095,AAEL012122,AAEL012943,AAEL025594,	28.6	5.27	7.03	0.000669169	0.00412775	0.647755
GO:0005975	carbohydrate metabolic process	191	22	AAEL000839,AAEL002331,AAEL002542,AAEL002779,AAEL004221,AAEL004970,AAEL005766,AAEL006070,AAEL008166,AAEL009389,AAEL009524,AAEL009691,AAEL010505,AAEL010684,AAEL011496,AAEL011789,AAEL013132,AAEL015022,AAEL016984,AAEL019681,AAEL022931,AAEL024228,	11.5	2.12	2.32	0.00066948	0.00412775	0.648057
GO:0044255	cellular lipid metabolic process	169	20	AAEL000004,AAEL001204,AAEL001670,AAEL002465,AAEL003363,AAEL003742,AAEL003746,AAEL006438,AAEL008393,AAEL008841,AAEL009311,AAEL010047,AAEL010146,AAEL010223,AAEL010465,AAEL010611,AAEL018132,AAEL021232,AAEL024566,AAEL027594,	11.8	2.18	2.39	0.00082369	0.0050464	0.797332
GO:0042168	heme metabolic process	9	4	AAEL003762,AAEL005415,AAEL006693,AAEL024350,	44.4	8.19	14.03	0.000867884	0.00528372	0.840112
GO:1901701	cellular response to oxygen-containing compound	15	5	AAEL001030,AAEL004823,AAEL019937,AAEL019938,AAEL025388,	33.3	6.14	8.78	0.000880173	0.00532505	0.852008
GO:0018208	peptidyl-proline modification	31	7	AAEL004313,AAEL007883,AAEL008367,AAEL011758,AAEL012272,AAEL013279,AAEL025082,	22.6	4.16	5.13	0.00112079	0.00673864	1
GO:0045454	cell redox homeostasis	40	8	AAEL001109,AAEL006928,AAEL008291,AAEL009708,AAEL009995,AAEL010777,AAEL013528,AAEL013845,	20	3.69	4.4	0.00117586	0.00702612	1
GO:1901700	response to oxygen-containing compound	16	5	AAEL001030,AAEL004823,AAEL019937,AAEL019938,AAEL025388,	31.3	5.76	7.98	0.00122359	0.00726648	1
GO:0045862	positive regulation of proteolysis	5	3	AAEL012095,AAEL012943,AAEL025594,	60	11.06	26.28	0.00146308	0.00863573	1
GO:0098754	detoxification	33	7	AAEL001030,AAEL004823,AAEL011941,AAEL013528,AAEL019937,AAEL019938,AAEL025388,	21.2	3.91	4.74	0.00165705	0.00954776	1
GO:0009636	response to toxic substance	33	7	AAEL001030,AAEL004823,AAEL011941,AAEL013528,AAEL019937,AAEL019938,AAEL025388,	21.2	3.91	4.74	0.00165705	0.00954776	1
GO:1990748	cellular detoxification	33	7	AAEL001030,AAEL004823,AAEL011941,AAEL013528,AAEL019937,AAEL019938,AAEL025388,	21.2	3.91	4.74	0.00165705	0.00954776	1
GO:0097237	cellular response to toxic substance	33	7	AAEL001030,AAEL004823,AAEL011941,AAEL013528,AAEL019937,AAEL019938,AAEL025388,	21.2	3.91	4.74	0.00165705	0.00954776	1
GO:0006801	superoxide metabolic process	11	4	AAEL004823,AAEL019937,AAEL019938,AAEL025388,	36.4	6.7	10.02	0.00208311	0.0118615	1
GO:0009166	nucleotide catabolic process	11	4	AAEL003246,AAEL009968,AAEL012382,AAEL012629,	36.4	6.7	10.02	0.00208311	0.0118615	1
GO:0007005	mitochondrion organization	44	8	AAEL005897,AAEL007367,AAEL008874,AAEL009590,AAEL011606,AAEL013876,AAEL021108,AAEL027287,	18.2	3.35	3.91	0.00223898	0.0126745	1
GO:0051156	glucose 6-phosphate metabolic process	6	3	AAEL009389,AAEL010505,AAEL011627,	50	9.22	17.52	0.00280832	0.0146613	1
GO:0009147	pyrimidine nucleoside triphosphate metabolic process	6	3	AAEL012359,AAEL012629,AAEL027453,	50	9.22	17.52	0.00280832	0.0146613	1
GO:0009081	branched-chain amino acid metabolic process	6	3	AAEL001134,AAEL013904,AAEL026440,	50	9.22	17.52	0.00280832	0.0146613	1
GO:0034440	lipid oxidation	6	3	AAEL008841,AAEL010047,AAEL010146,	50	9.22	17.52	0.00280832	0.0146613	1
GO:0006098	pentose-phosphate shunt	6	3	AAEL009389,AAEL010505,AAEL011627,	50	9.22	17.52	0.00280832	0.0146613	1
GO:0072329	monocarboxylic acid catabolic process	6	3	AAEL008841,AAEL010047,AAEL010146,	50	9.22	17.52	0.00280832	0.0146613	1
GO:0009062	fatty acid catabolic process	6	3	AAEL008841,AAEL010047,AAEL010146,	50	9.22	17.52	0.00280832	0.0146613	1
GO:0019395	fatty acid oxidation	6	3	AAEL008841,AAEL010047,AAEL010146,	50	9.22	17.52	0.00280832	0.0146613	1
GO:0006740	NADPH regeneration	6	3	AAEL009389,AAEL010505,AAEL011627,	50	9.22	17.52	0.00280832	0.0146613	1
GO:0006635	fatty acid beta-oxidation	6	3	AAEL008841,AAEL010047,AAEL010146,	50	9.22	17.52	0.00280832	0.0146613	1
GO:0043161	proteasome-mediated ubiquitin-dependent protein catabolic process	19	5	AAEL004308,AAEL004563,AAEL006174,AAEL006441,AAEL010793,	26.3	4.85	6.27	0.00284481	0.0146613	1
GO:0010498	proteasomal protein catabolic process	19	5	AAEL004308,AAEL004563,AAEL006174,AAEL006441,AAEL010793,	26.3	4.85	6.27	0.00284481	0.0146613	1
GO:0071692	protein localization to extracellular region	2	2	AAEL026991,AAEL027089,	100	18.43	inf	0.00293832	0.0146613	1
GO:0006452	translational frameshifting	2	2	AAEL003835,AAEL023486,	100	18.43	inf	0.00293832	0.0146613	1
GO:0009306	protein secretion	2	2	AAEL026991,AAEL027089,	100	18.43	inf	0.00293832	0.0146613	1
GO:0035592	establishment of protein localization to extracellular region	2	2	AAEL026991,AAEL027089,	100	18.43	inf	0.00293832	0.0146613	1
GO:0009264	deoxyribonucleotide catabolic process	2	2	AAEL003246,AAEL012629,	100	18.43	inf	0.00293832	0.0146613	1
GO:0045905	positive regulation of translational termination	2	2	AAEL003835,AAEL023486,	100	18.43	inf	0.00293832	0.0146613	1
GO:0006449	regulation of translational termination	2	2	AAEL003835,AAEL023486,	100	18.43	inf	0.00293832	0.0146613	1
GO:0045901	positive regulation of translational elongation	2	2	AAEL003835,AAEL023486,	100	18.43	inf	0.00293832	0.0146613	1
GO:0002790	peptide secretion	2	2	AAEL026991,AAEL027089,	100	18.43	inf	0.00293832	0.0146613	1
GO:0008295	spermidine biosynthetic process	2	2	AAEL001176,AAEL025170,	100	18.43	inf	0.00293832	0.0146613	1
GO:0008216	spermidine metabolic process	2	2	AAEL001176,AAEL025170,	100	18.43	inf	0.00293832	0.0146613	1
GO:0009112	nucleobase metabolic process	12	4	AAEL001134,AAEL003213,AAEL010640,AAEL026393,	33.3	6.14	8.77	0.00299166	0.0147263	1
GO:1901292	nucleoside phosphate catabolic process	12	4	AAEL003246,AAEL009968,AAEL012382,AAEL012629,	33.3	6.14	8.77	0.00299166	0.0147263	1
GO:0006790	sulfur compound metabolic process	46	8	AAEL000759,AAEL001176,AAEL001501,AAEL004338,AAEL005308,AAEL005552,AAEL011822,AAEL014154,	17.4	3.21	3.71	0.00299699	0.0147263	1
GO:0042592	homeostatic process	67	10	AAEL001109,AAEL006928,AAEL008216,AAEL008291,AAEL009708,AAEL009995,AAEL010777,AAEL013528,AAEL013845,AAEL014058,	14.9	2.75	3.09	0.00309124	0.0151127	1
GO:0019725	cellular homeostasis	57	9	AAEL001109,AAEL006928,AAEL008216,AAEL008291,AAEL009708,AAEL009995,AAEL010777,AAEL013528,AAEL013845,	15.8	2.91	3.3	0.00333338	0.0162146	1
GO:0005996	monosaccharide metabolic process	28	6	AAEL000839,AAEL002542,AAEL002779,AAEL009691,AAEL013132,AAEL016984,	21.4	3.95	4.79	0.00336034	0.0162641	1
GO:0045017	glycerolipid biosynthetic process	47	8	AAEL000004,AAEL001204,AAEL001670,AAEL002465,AAEL008393,AAEL010223,AAEL010465,AAEL024566,	17	3.14	3.61	0.00344404	0.016546	1
GO:0006260	DNA replication	68	10	AAEL000999,AAEL002810,AAEL004698,AAEL006080,AAEL007007,AAEL010086,AAEL011811,AAEL012545,AAEL012546,AAEL017566,	14.7	2.71	3.04	0.00345278	0.016546	1
GO:0051247	positive regulation of protein metabolic process	21	5	AAEL003835,AAEL012095,AAEL012943,AAEL023486,AAEL025594,	23.8	4.39	5.49	0.00455023	0.0215913	1
GO:0032270	positive regulation of cellular protein metabolic process	21	5	AAEL003835,AAEL012095,AAEL012943,AAEL023486,AAEL025594,	23.8	4.39	5.49	0.00455023	0.0215913	1
GO:0006144	purine nucleobase metabolic process	7	3	AAEL003213,AAEL010640,AAEL026393,	42.9	7.9	13.14	0.00471719	0.0221662	1
GO:0006081	cellular aldehyde metabolic process	7	3	AAEL001030,AAEL002703,AAEL012161,	42.9	7.9	13.14	0.00471719	0.0221662	1
GO:0030258	lipid modification	14	4	AAEL003363,AAEL008841,AAEL010047,AAEL010146,	28.6	5.27	7.01	0.0055472	0.0256923	1
GO:0072593	reactive oxygen species metabolic process	14	4	AAEL004823,AAEL019937,AAEL019938,AAEL025388,	28.6	5.27	7.01	0.0055472	0.0256923	1
GO:0033108	mitochondrial respiratory chain complex assembly	14	4	AAEL007367,AAEL008874,AAEL013876,AAEL021108,	28.6	5.27	7.01	0.0055472	0.0256923	1
GO:1901136	carbohydrate derivative catabolic process	22	5	AAEL003246,AAEL005676,AAEL007039,AAEL012629,AAEL017056,	22.7	4.19	5.16	0.00563019	0.0259525	1
GO:0044262	cellular carbohydrate metabolic process	31	6	AAEL002779,AAEL004221,AAEL004970,AAEL009524,AAEL010684,AAEL013132,	19.4	3.57	4.22	0.00572067	0.0262446	1
GO:0098869	cellular oxidant detoxification	32	6	AAEL004823,AAEL011941,AAEL013528,AAEL019937,AAEL019938,AAEL025388,	18.8	3.46	4.05	0.00672501	0.0307067	1
GO:0006744	ubiquinone biosynthetic process	8	3	AAEL004180,AAEL008330,AAEL011379,	37.5	6.91	10.51	0.00724528	0.0320248	1
GO:0008643	carbohydrate transport	8	3	AAEL005353,AAEL006718,AAEL019597,	37.5	6.91	10.51	0.00724528	0.0320248	1
GO:1901663	quinone biosynthetic process	8	3	AAEL004180,AAEL008330,AAEL011379,	37.5	6.91	10.51	0.00724528	0.0320248	1
GO:0006743	ubiquinone metabolic process	8	3	AAEL004180,AAEL008330,AAEL011379,	37.5	6.91	10.51	0.00724528	0.0320248	1
GO:0042181	ketone biosynthetic process	8	3	AAEL004180,AAEL008330,AAEL011379,	37.5	6.91	10.51	0.00724528	0.0320248	1
GO:0035383	thioester metabolic process	8	3	AAEL004338,AAEL005308,AAEL005552,	37.5	6.91	10.51	0.00724528	0.0320248	1
GO:0006637	acyl-CoA metabolic process	8	3	AAEL004338,AAEL005308,AAEL005552,	37.5	6.91	10.51	0.00724528	0.0320248	1
GO:0033554	cellular response to stress	138	15	AAEL003684,AAEL003893,AAEL004562,AAEL004563,AAEL004823,AAEL006080,AAEL006209,AAEL010913,AAEL017566,AAEL019774,AAEL019937,AAEL019938,AAEL025388,AAEL027287,AAEL027688,	10.9	2	2.15	0.00781169	0.0343715	1
GO:0006629	lipid metabolic process	275	25	AAEL000004,AAEL001204,AAEL001670,AAEL001737,AAEL001747,AAEL002465,AAEL003363,AAEL003742,AAEL003746,AAEL006438,AAEL008393,AAEL008740,AAEL008841,AAEL009311,AAEL010047,AAEL010146,AAEL010223,AAEL010465,AAEL010611,AAEL013814,AAEL018132,AAEL021232,AAEL022132,AAEL024566,AAEL027594,	9.1	1.68	1.78	0.00786322	0.0344416	1
GO:0006505	GPI anchor metabolic process	24	5	AAEL000004,AAEL001670,AAEL002465,AAEL010465,AAEL024566,	20.8	3.84	4.62	0.0083092	0.0348527	1
GO:0009247	glycolipid biosynthetic process	24	5	AAEL000004,AAEL001670,AAEL002465,AAEL010465,AAEL024566,	20.8	3.84	4.62	0.0083092	0.0348527	1
GO:0006506	GPI anchor biosynthetic process	24	5	AAEL000004,AAEL001670,AAEL002465,AAEL010465,AAEL024566,	20.8	3.84	4.62	0.0083092	0.0348527	1
GO:0015937	coenzyme A biosynthetic process	3	2	AAEL003770,AAEL013394,	66.7	12.29	34.98	0.00849716	0.0348527	1
GO:0006597	spermine biosynthetic process	3	2	AAEL001176,AAEL025170,	66.7	12.29	34.98	0.00849716	0.0348527	1
GO:0046051	UTP metabolic process	3	2	AAEL012359,AAEL027453,	66.7	12.29	34.98	0.00849716	0.0348527	1
GO:0043243	positive regulation of protein-containing complex disassembly	3	2	AAEL003835,AAEL023486,	66.7	12.29	34.98	0.00849716	0.0348527	1
GO:0006228	UTP biosynthetic process	3	2	AAEL012359,AAEL027453,	66.7	12.29	34.98	0.00849716	0.0348527	1
GO:0010038	response to metal ion	3	2	AAEL008216,AAEL012710,	66.7	12.29	34.98	0.00849716	0.0348527	1
GO:0006183	GTP biosynthetic process	3	2	AAEL012359,AAEL027453,	66.7	12.29	34.98	0.00849716	0.0348527	1
GO:0008215	spermine metabolic process	3	2	AAEL001176,AAEL025170,	66.7	12.29	34.98	0.00849716	0.0348527	1
GO:0006086	acetyl-CoA biosynthetic process from pyruvate	3	2	AAEL004338,AAEL005308,	66.7	12.29	34.98	0.00849716	0.0348527	1
GO:0016559	peroxisome fission	3	2	AAEL002433,AAEL024815,	66.7	12.29	34.98	0.00849716	0.0348527	1
GO:0046501	protoporphyrinogen IX metabolic process	3	2	AAEL003762,AAEL006693,	66.7	12.29	34.98	0.00849716	0.0348527	1
GO:0006782	protoporphyrinogen IX biosynthetic process	3	2	AAEL003762,AAEL006693,	66.7	12.29	34.98	0.00849716	0.0348527	1
GO:0065008	regulation of biological quality	128	14	AAEL001109,AAEL003524,AAEL006928,AAEL008216,AAEL008291,AAEL009041,AAEL009708,AAEL009995,AAEL010661,AAEL010777,AAEL013528,AAEL013845,AAEL014058,AAEL027287,	10.9	2.02	2.17	0.00946538	0.0386603	1
GO:0006497	protein lipidation	25	5	AAEL000004,AAEL001670,AAEL002465,AAEL010465,AAEL024566,	20	3.69	4.39	0.00993293	0.0397317	1
GO:0042158	lipoprotein biosynthetic process	25	5	AAEL000004,AAEL001670,AAEL002465,AAEL010465,AAEL024566,	20	3.69	4.39	0.00993293	0.0397317	1
GO:0046467	membrane lipid biosynthetic process	25	5	AAEL000004,AAEL001670,AAEL002465,AAEL010465,AAEL024566,	20	3.69	4.39	0.00993293	0.0397317	1
GO:0006664	glycolipid metabolic process	25	5	AAEL000004,AAEL001670,AAEL002465,AAEL010465,AAEL024566,	20	3.69	4.39	0.00993293	0.0397317	1
GO:1903509	liposaccharide metabolic process	25	5	AAEL000004,AAEL001670,AAEL002465,AAEL010465,AAEL024566,	20	3.69	4.39	0.00993293	0.0397317	1
GO:0072525	pyridine-containing compound biosynthetic process	9	3	AAEL002703,AAEL005106,AAEL011703,	33.3	6.14	8.76	0.010434	0.0412248	1
GO:1901661	quinone metabolic process	9	3	AAEL004180,AAEL008330,AAEL011379,	33.3	6.14	8.76	0.010434	0.0412248	1
GO:0006006	glucose metabolic process	9	3	AAEL002542,AAEL009691,AAEL016984,	33.3	6.14	8.76	0.010434	0.0412248	1
GO:0046486	glycerolipid metabolic process	57	8	AAEL000004,AAEL001204,AAEL001670,AAEL002465,AAEL008393,AAEL010223,AAEL010465,AAEL024566,	14	2.59	2.87	0.011274	0.0442856	1
GO:0046474	glycerophospholipid biosynthetic process	46	7	AAEL000004,AAEL001670,AAEL002465,AAEL008393,AAEL010223,AAEL010465,AAEL024566,	15.2	2.81	3.15	0.0113002	0.0442856	1
GO:0042157	lipoprotein metabolic process	26	5	AAEL000004,AAEL001670,AAEL002465,AAEL010465,AAEL024566,	19.2	3.54	4.18	0.0117617	0.0457242	1
GO:0019318	hexose metabolic process	26	5	AAEL000839,AAEL002542,AAEL009691,AAEL013132,AAEL016984,	19.2	3.54	4.18	0.0117617	0.0457242	1
GO:0006643	membrane lipid metabolic process	37	6	AAEL000004,AAEL001670,AAEL002465,AAEL003742,AAEL010465,AAEL024566,	16.2	2.99	3.4	0.0137271	0.0526166	1
GO:0008654	phospholipid biosynthetic process	59	8	AAEL000004,AAEL001670,AAEL002465,AAEL008393,AAEL010223,AAEL010465,AAEL018132,AAEL024566,	13.6	2.5	2.76	0.0137697	0.0526166	1
GO:0046395	carboxylic acid catabolic process	27	5	AAEL008841,AAEL010047,AAEL010146,AAEL012974,AAEL013904,	18.5	3.41	3.99	0.0138064	0.0526166	1
GO:0016054	organic acid catabolic process	27	5	AAEL008841,AAEL010047,AAEL010146,AAEL012974,AAEL013904,	18.5	3.41	3.99	0.0138064	0.0526166	1
GO:0006979	response to oxidative stress	27	5	AAEL004823,AAEL011941,AAEL019937,AAEL019938,AAEL025388,	18.5	3.41	3.99	0.0138064	0.0526166	1
GO:0072527	pyrimidine-containing compound metabolic process	18	4	AAEL001134,AAEL012359,AAEL012629,AAEL027453,	22.2	4.1	5.01	0.0142723	0.0536987	1
GO:0006595	polyamine metabolic process	10	3	AAEL001176,AAEL007878,AAEL025170,	30	5.53	7.5	0.0143122	0.0536987	1
GO:0072524	pyridine-containing compound metabolic process	10	3	AAEL002703,AAEL005106,AAEL011703,	30	5.53	7.5	0.0143122	0.0536987	1
GO:0006596	polyamine biosynthetic process	10	3	AAEL001176,AAEL007878,AAEL025170,	30	5.53	7.5	0.0143122	0.0536987	1
GO:0006520	cellular amino acid metabolic process	123	13	AAEL001100,AAEL001134,AAEL001887,AAEL003994,AAEL005688,AAEL010464,AAEL012579,AAEL012674,AAEL012974,AAEL013904,AAEL024412,AAEL025993,AAEL026440,	10.6	1.95	2.08	0.01586	0.0591797	1
GO:0006066	alcohol metabolic process	28	5	AAEL000746,AAEL002898,AAEL004970,AAEL006458,AAEL013814,	17.9	3.29	3.81	0.0160773	0.0591797	1
GO:0009113	purine nucleobase biosynthetic process	4	2	AAEL010640,AAEL026393,	50	9.22	17.49	0.0163845	0.0591797	1
GO:0007006	mitochondrial membrane organization	4	2	AAEL005897,AAEL027287,	50	9.22	17.49	0.0163845	0.0591797	1
GO:0072523	purine-containing compound catabolic process	4	2	AAEL003213,AAEL005676,	50	9.22	17.49	0.0163845	0.0591797	1
GO:0005984	disaccharide metabolic process	4	2	AAEL009524,AAEL010684,	50	9.22	17.49	0.0163845	0.0591797	1
GO:0045727	positive regulation of translation	4	2	AAEL003835,AAEL023486,	50	9.22	17.49	0.0163845	0.0591797	1
GO:0006573	valine metabolic process	4	2	AAEL001134,AAEL013904,	50	9.22	17.49	0.0163845	0.0591797	1
GO:0046039	GTP metabolic process	4	2	AAEL012359,AAEL027453,	50	9.22	17.49	0.0163845	0.0591797	1
GO:0034250	positive regulation of cellular amide metabolic process	4	2	AAEL003835,AAEL023486,	50	9.22	17.49	0.0163845	0.0591797	1
GO:1901615	organic hydroxy compound metabolic process	39	6	AAEL000746,AAEL002703,AAEL002898,AAEL004970,AAEL006458,AAEL013814,	15.4	2.84	3.19	0.0175887	0.0632932	1
GO:0008610	lipid biosynthetic process	125	13	AAEL000004,AAEL001204,AAEL001670,AAEL002465,AAEL008393,AAEL009311,AAEL010223,AAEL010465,AAEL010611,AAEL013814,AAEL018132,AAEL024566,AAEL027594,	10.4	1.92	2.05	0.0179341	0.0642969	1
GO:0006950	response to stress	194	18	AAEL003684,AAEL003893,AAEL004562,AAEL004563,AAEL004823,AAEL006080,AAEL006209,AAEL007039,AAEL010913,AAEL011941,AAEL017056,AAEL017566,AAEL019774,AAEL019937,AAEL019938,AAEL025388,AAEL027287,AAEL027688,	9.3	1.71	1.81	0.0182424	0.0651611	1
GO:0009309	amine biosynthetic process	11	3	AAEL001176,AAEL007878,AAEL025170,	27.3	5.03	6.57	0.0188982	0.0665216	1
GO:0006221	pyrimidine nucleotide biosynthetic process	11	3	AAEL012359,AAEL012629,AAEL027453,	27.3	5.03	6.57	0.0188982	0.0665216	1
GO:0042401	cellular biogenic amine biosynthetic process	11	3	AAEL001176,AAEL007878,AAEL025170,	27.3	5.03	6.57	0.0188982	0.0665216	1
GO:0042398	cellular modified amino acid biosynthetic process	11	3	AAEL000759,AAEL008393,AAEL009185,	27.3	5.03	6.57	0.0188982	0.0665216	1
GO:0006220	pyrimidine nucleotide metabolic process	12	3	AAEL012359,AAEL012629,AAEL027453,	25	4.61	5.84	0.0242003	0.0838376	1
GO:0031331	positive regulation of cellular catabolic process	12	3	AAEL012095,AAEL012943,AAEL025594,	25	4.61	5.84	0.0242003	0.0838376	1
GO:0009896	positive regulation of catabolic process	12	3	AAEL012095,AAEL012943,AAEL025594,	25	4.61	5.84	0.0242003	0.0838376	1
GO:0051173	positive regulation of nitrogen compound metabolic process	31	5	AAEL003835,AAEL012095,AAEL012943,AAEL023486,AAEL025594,	16.1	2.97	3.37	0.0243371	0.0838376	1
GO:0010604	positive regulation of macromolecule metabolic process	31	5	AAEL003835,AAEL012095,AAEL012943,AAEL023486,AAEL025594,	16.1	2.97	3.37	0.0243371	0.0838376	1
GO:0061024	membrane organization	31	5	AAEL005897,AAEL010661,AAEL017371,AAEL021418,AAEL027287,	16.1	2.97	3.37	0.0243371	0.0838376	1
GO:0046036	CTP metabolic process	5	2	AAEL012359,AAEL027453,	40	7.37	11.66	0.026332	0.0861129	1
GO:0009891	positive regulation of biosynthetic process	5	2	AAEL003835,AAEL023486,	40	7.37	11.66	0.026332	0.0861129	1
GO:0071616	acyl-CoA biosynthetic process	5	2	AAEL004338,AAEL005308,	40	7.37	11.66	0.026332	0.0861129	1
GO:0009209	pyrimidine ribonucleoside triphosphate biosynthetic process	5	2	AAEL012359,AAEL027453,	40	7.37	11.66	0.026332	0.0861129	1
GO:0009208	pyrimidine ribonucleoside triphosphate metabolic process	5	2	AAEL012359,AAEL027453,	40	7.37	11.66	0.026332	0.0861129	1
GO:0035384	thioester biosynthetic process	5	2	AAEL004338,AAEL005308,	40	7.37	11.66	0.026332	0.0861129	1
GO:0031328	positive regulation of cellular biosynthetic process	5	2	AAEL003835,AAEL023486,	40	7.37	11.66	0.026332	0.0861129	1
GO:0072350	tricarboxylic acid metabolic process	5	2	AAEL000746,AAEL011789,	40	7.37	11.66	0.026332	0.0861129	1
GO:0009148	pyrimidine nucleoside triphosphate biosynthetic process	5	2	AAEL012359,AAEL027453,	40	7.37	11.66	0.026332	0.0861129	1
GO:0010557	positive regulation of macromolecule biosynthetic process	5	2	AAEL003835,AAEL023486,	40	7.37	11.66	0.026332	0.0861129	1
GO:0010257	NADH dehydrogenase complex assembly	5	2	AAEL008874,AAEL013876,	40	7.37	11.66	0.026332	0.0861129	1
GO:0032981	mitochondrial respiratory chain complex I assembly	5	2	AAEL008874,AAEL013876,	40	7.37	11.66	0.026332	0.0861129	1
GO:0006085	acetyl-CoA biosynthetic process	5	2	AAEL004338,AAEL005308,	40	7.37	11.66	0.026332	0.0861129	1
GO:0006189	'de novo' IMP biosynthetic process	5	2	AAEL010640,AAEL027199,	40	7.37	11.66	0.026332	0.0861129	1
GO:0006241	CTP biosynthetic process	5	2	AAEL012359,AAEL027453,	40	7.37	11.66	0.026332	0.0861129	1
GO:0031325	positive regulation of cellular metabolic process	32	5	AAEL003835,AAEL012095,AAEL012943,AAEL023486,AAEL025594,	15.6	2.88	3.25	0.0275986	0.0896493	1
GO:0009893	positive regulation of metabolic process	32	5	AAEL003835,AAEL012095,AAEL012943,AAEL023486,AAEL025594,	15.6	2.88	3.25	0.0275986	0.0896493	1
GO:0044272	sulfur compound biosynthetic process	22	4	AAEL000759,AAEL001176,AAEL004338,AAEL005308,	18.2	3.35	3.89	0.0287581	0.0927927	1
GO:0016051	carbohydrate biosynthetic process	22	4	AAEL002542,AAEL004221,AAEL009691,AAEL010684,	18.2	3.35	3.89	0.0287581	0.0927927	1
GO:0072528	pyrimidine-containing compound biosynthetic process	13	3	AAEL012359,AAEL012629,AAEL027453,	23.1	4.25	5.25	0.0302191	0.0968613	1
GO:0042180	cellular ketone metabolic process	13	3	AAEL004180,AAEL008330,AAEL011379,	23.1	4.25	5.25	0.0302191	0.0968613	1
GO:0006631	fatty acid metabolic process	44	6	AAEL003746,AAEL008841,AAEL010047,AAEL010146,AAEL010611,AAEL027594,	13.6	2.51	2.77	0.0303429	0.0969371	1
GO:0006650	glycerophospholipid metabolic process	56	7	AAEL000004,AAEL001670,AAEL002465,AAEL008393,AAEL010223,AAEL010465,AAEL024566,	12.5	2.3	2.51	0.0308401	0.0982014	1
GO:0009123	nucleoside monophosphate metabolic process	23	4	AAEL010640,AAEL012629,AAEL012731,AAEL027199,	17.4	3.21	3.69	0.0333642	0.10589	1
GO:0009126	purine nucleoside monophosphate metabolic process	14	3	AAEL010640,AAEL012731,AAEL027199,	21.4	3.95	4.77	0.0369478	0.116881	1
GO:0009262	deoxyribonucleotide metabolic process	6	2	AAEL003246,AAEL012629,	33.3	6.14	8.74	0.0380939	0.118189	1
GO:1902652	secondary alcohol metabolic process	6	2	AAEL000746,AAEL013814,	33.3	6.14	8.74	0.0380939	0.118189	1
GO:0006188	IMP biosynthetic process	6	2	AAEL010640,AAEL027199,	33.3	6.14	8.74	0.0380939	0.118189	1
GO:0046033	AMP metabolic process	6	2	AAEL012731,AAEL027199,	33.3	6.14	8.74	0.0380939	0.118189	1
GO:0046040	IMP metabolic process	6	2	AAEL010640,AAEL027199,	33.3	6.14	8.74	0.0380939	0.118189	1
GO:0006448	regulation of translational elongation	6	2	AAEL003835,AAEL023486,	33.3	6.14	8.74	0.0380939	0.118189	1
GO:0006575	cellular modified amino acid metabolic process	24	4	AAEL000759,AAEL008393,AAEL009185,AAEL011822,	16.7	3.07	3.5	0.0383752	0.118681	1
GO:0046434	organophosphate catabolic process	25	4	AAEL003246,AAEL009968,AAEL012382,AAEL012629,	16	2.95	3.34	0.0437928	0.121558	1
GO:0044242	cellular lipid catabolic process	15	3	AAEL008841,AAEL010047,AAEL010146,	20	3.69	4.38	0.0443737	0.121558	1
GO:0044106	cellular amine metabolic process	15	3	AAEL001176,AAEL007878,AAEL025170,	20	3.69	4.38	0.0443737	0.121558	1
GO:0006576	cellular biogenic amine metabolic process	15	3	AAEL001176,AAEL007878,AAEL025170,	20	3.69	4.38	0.0443737	0.121558	1
GO:0006302	double-strand break repair	15	3	AAEL003684,AAEL006080,AAEL010913,	20	3.69	4.38	0.0443737	0.121558	1
GO:0009308	amine metabolic process	15	3	AAEL001176,AAEL007878,AAEL025170,	20	3.69	4.38	0.0443737	0.121558	1
GO:0044267	cellular protein metabolic process	974	65	AAEL000004,AAEL000424,AAEL000564,AAEL000654,AAEL001670,AAEL002401,AAEL002465,AAEL003230,AAEL003431,AAEL003466,AAEL003835,AAEL003871,AAEL003994,AAEL004069,AAEL004308,AAEL004313,AAEL004563,AAEL004653,AAEL004733,AAEL004879,AAEL005688,AAEL005830,AAEL006056,AAEL006061,AAEL006174,AAEL006251,AAEL006438,AAEL006440,AAEL006441,AAEL006617,AAEL006929,AAEL007883,AAEL008169,AAEL008367,AAEL008458,AAEL008770,AAE…	6.7	1.23	1.28	0.0450303	0.121558	1
GO:0006644	phospholipid metabolic process	87	9	AAEL000004,AAEL001670,AAEL002465,AAEL003363,AAEL008393,AAEL010223,AAEL010465,AAEL018132,AAEL024566,	10.3	1.91	2.03	0.0457174	0.121558	1

## Sheet: 8hp_MF
ID	Name	Bgd count	Result count	Result gene list	Pct of bgd	Fold enrichment	Odds ratio	P-value	Benjamini	Bonferroni
GO:0009055	electron transfer activity	68	37	AAEL000986,AAEL001109,AAEL001164,AAEL001501,AAEL002737,AAEL002825,AAEL003234,AAEL003675,AAEL004457,AAEL005143,AAEL005170,AAEL005946,AAEL006428,AAEL006928,AAEL007681,AAEL007752,AAEL008072,AAEL008490,AAEL008697,AAEL008871,AAEL009257,AAEL010330,AAEL010801,AAEL010840,AAEL011157,AAEL011871,AAEL012552,AAEL013739,AAEL014379,AAEL014944,AAEL018658,AAEL018671,AAEL018684,AAEL018685,AAEL018687,AAEL025321,AAE…	54.4	10.03	22.1	2.29797e-29	7.23185e-27	1.26159e-26
GO:0015078	proton transmembrane transporter activity	56	34	AAEL000137,AAEL000291,AAEL002464,AAEL002504,AAEL002737,AAEL002813,AAEL002827,AAEL003234,AAEL003393,AAEL003675,AAEL004060,AAEL004423,AAEL005143,AAEL005170,AAEL005610,AAEL006509,AAEL006516,AAEL007752,AAEL008697,AAEL008848,AAEL009257,AAEL009964,AAEL010801,AAEL010819,AAEL010823,AAEL012035,AAEL012113,AAEL012175,AAEL012740,AAEL014944,AAEL018667,AAEL018685,AAEL020429,AAEL024040,	60.7	11.19	28.5	2.63455e-29	7.23185e-27	1.44637e-26
GO:0003824	catalytic activity	3624	320	AAEL000004,AAEL000424,AAEL000427,AAEL000434,AAEL000454,AAEL000564,AAEL000572,AAEL000654,AAEL000746,AAEL000797,AAEL000839,AAEL000986,AAEL000999,AAEL001030,AAEL001048,AAEL001109,AAEL001134,AAEL001164,AAEL001176,AAEL001194,AAEL001204,AAEL001270,AAEL001501,AAEL001588,AAEL001649,AAEL001670,AAEL001737,AAEL001747,AAEL001887,AAEL002107,AAEL002255,AAEL002304,AAEL002331,AAEL002401,AAEL002465,AAEL002504,AAE…	8.8	1.63	2.47	1.15172e-26	2.10765e-24	6.32295e-24
GO:0015453	oxidoreduction-driven active transmembrane transporter activity	38	26	AAEL000986,AAEL001164,AAEL002737,AAEL002825,AAEL003234,AAEL003675,AAEL005143,AAEL005170,AAEL005946,AAEL007681,AAEL007752,AAEL008072,AAEL008490,AAEL008697,AAEL009257,AAEL010801,AAEL010840,AAEL011157,AAEL012552,AAEL014944,AAEL018658,AAEL018671,AAEL018684,AAEL018685,AAEL018687,AAEL026806,	68.4	12.61	39.43	1.08074e-24	1.48332e-22	5.93328e-22
GO:0015399	primary active transmembrane transporter activity	88	37	AAEL000434,AAEL000986,AAEL001164,AAEL002464,AAEL002737,AAEL002825,AAEL003234,AAEL003675,AAEL005043,AAEL005143,AAEL005170,AAEL005918,AAEL005946,AAEL006516,AAEL006717,AAEL007681,AAEL007752,AAEL008072,AAEL008490,AAEL008697,AAEL009257,AAEL009808,AAEL010047,AAEL010801,AAEL010840,AAEL011157,AAEL012035,AAEL012552,AAEL014944,AAEL018658,AAEL018671,AAEL018684,AAEL018685,AAEL018687,AAEL019458,AAEL026806,AAE…	42	7.75	13.41	3.27715e-24	3.59831e-22	1.79915e-21
GO:0016491	oxidoreductase activity	669	101	AAEL000454,AAEL000746,AAEL000797,AAEL000986,AAEL001048,AAEL001109,AAEL001134,AAEL001164,AAEL001194,AAEL001501,AAEL001737,AAEL001747,AAEL002107,AAEL002703,AAEL002737,AAEL002825,AAEL002861,AAEL003125,AAEL003234,AAEL003423,AAEL003675,AAEL003762,AAEL003995,AAEL004180,AAEL004338,AAEL004457,AAEL004823,AAEL005143,AAEL005170,AAEL005308,AAEL005336,AAEL005508,AAEL005790,AAEL005946,AAEL006428,AAEL006458,AAE…	15.1	2.78	3.52	5.87522e-22	5.37583e-20	3.2255e-19
GO:0022804	active transmembrane transporter activity	139	40	AAEL000137,AAEL000434,AAEL000986,AAEL001164,AAEL002464,AAEL002737,AAEL002825,AAEL003234,AAEL003524,AAEL003675,AAEL005043,AAEL005143,AAEL005170,AAEL005918,AAEL005946,AAEL006516,AAEL006717,AAEL006800,AAEL007681,AAEL007752,AAEL008072,AAEL008490,AAEL008697,AAEL009257,AAEL009808,AAEL010047,AAEL010801,AAEL010840,AAEL011157,AAEL012035,AAEL012552,AAEL014944,AAEL018658,AAEL018671,AAEL018684,AAEL018685,AAE…	28.8	5.3	7.47	5.48782e-19	4.30402e-17	3.01281e-16
GO:0016651	oxidoreductase activity, acting on NAD(P)H	30	19	AAEL000986,AAEL001164,AAEL002825,AAEL003423,AAEL005946,AAEL007681,AAEL008072,AAEL008490,AAEL010840,AAEL011157,AAEL011381,AAEL012552,AAEL013744,AAEL018658,AAEL018671,AAEL018684,AAEL018687,AAEL026806,AAEL027771,	63.3	11.67	31.06	2.12779e-17	1.4602e-15	1.16816e-14
GO:0003954	NADH dehydrogenase activity	21	16	AAEL000986,AAEL001164,AAEL002825,AAEL003423,AAEL005946,AAEL007681,AAEL008072,AAEL008490,AAEL010840,AAEL011157,AAEL012552,AAEL018658,AAEL018671,AAEL018684,AAEL018687,AAEL026806,	76.2	14.04	57.28	7.33387e-17	4.47366e-15	4.02629e-14
GO:0016655	oxidoreductase activity, acting on NAD(P)H, quinone or similar compound as acceptor	20	15	AAEL000986,AAEL001164,AAEL002825,AAEL005946,AAEL007681,AAEL008072,AAEL008490,AAEL010840,AAEL011157,AAEL012552,AAEL018658,AAEL018671,AAEL018684,AAEL018687,AAEL026806,	75	13.83	53.61	1.05555e-15	4.45769e-14	5.79499e-13
GO:0050136	NADH dehydrogenase (quinone) activity	20	15	AAEL000986,AAEL001164,AAEL002825,AAEL005946,AAEL007681,AAEL008072,AAEL008490,AAEL010840,AAEL011157,AAEL012552,AAEL018658,AAEL018671,AAEL018684,AAEL018687,AAEL026806,	75	13.83	53.61	1.05555e-15	4.45769e-14	5.79499e-13
GO:0008137	NADH dehydrogenase (ubiquinone) activity	20	15	AAEL000986,AAEL001164,AAEL002825,AAEL005946,AAEL007681,AAEL008072,AAEL008490,AAEL010840,AAEL011157,AAEL012552,AAEL018658,AAEL018671,AAEL018684,AAEL018687,AAEL026806,	75	13.83	53.61	1.05555e-15	4.45769e-14	5.79499e-13
GO:0003955	NAD(P)H dehydrogenase (quinone) activity	20	15	AAEL000986,AAEL001164,AAEL002825,AAEL005946,AAEL007681,AAEL008072,AAEL008490,AAEL010840,AAEL011157,AAEL012552,AAEL018658,AAEL018671,AAEL018684,AAEL018687,AAEL026806,	75	13.83	53.61	1.05555e-15	4.45769e-14	5.79499e-13
GO:0004298	threonine-type endopeptidase activity	15	13	AAEL002401,AAEL003431,AAEL003871,AAEL004308,AAEL005830,AAEL006061,AAEL006174,AAEL006441,AAEL008770,AAEL009898,AAEL010087,AAEL013236,AAEL015007,	86.7	15.98	115.8	2.95605e-15	1.15919e-13	1.62287e-12
GO:0070003	threonine-type peptidase activity	21	14	AAEL002401,AAEL003431,AAEL003871,AAEL004308,AAEL005830,AAEL006061,AAEL006174,AAEL006441,AAEL008770,AAEL009898,AAEL010087,AAEL011822,AAEL013236,AAEL015007,	66.7	12.29	35.67	1.3492e-13	4.93807e-12	7.40711e-11
GO:0022857	transmembrane transporter activity	583	74	AAEL000137,AAEL000291,AAEL000434,AAEL000986,AAEL001164,AAEL001752,AAEL002436,AAEL002464,AAEL002504,AAEL002737,AAEL002813,AAEL002825,AAEL002827,AAEL003192,AAEL003234,AAEL003393,AAEL003524,AAEL003675,AAEL004060,AAEL004124,AAEL004423,AAEL005008,AAEL005043,AAEL005143,AAEL005170,AAEL005610,AAEL005918,AAEL005946,AAEL006509,AAEL006516,AAEL006717,AAEL006800,AAEL007681,AAEL007752,AAEL008072,AAEL008232,AAE…	12.7	2.34	2.75	3.39574e-12	1.16516e-10	1.86426e-09
GO:0022890	inorganic cation transmembrane transporter activity	200	38	AAEL000137,AAEL000291,AAEL002436,AAEL002464,AAEL002504,AAEL002737,AAEL002813,AAEL002827,AAEL003234,AAEL003393,AAEL003675,AAEL004060,AAEL004423,AAEL005143,AAEL005170,AAEL005610,AAEL006509,AAEL006516,AAEL006800,AAEL007752,AAEL008697,AAEL008848,AAEL009257,AAEL009964,AAEL010801,AAEL010819,AAEL010823,AAEL012035,AAEL012113,AAEL012175,AAEL012740,AAEL013490,AAEL014944,AAEL018667,AAEL018685,AAEL019458,AAE…	19	3.5	4.3	8.0316e-12	2.59374e-10	4.40935e-09
GO:0005215	transporter activity	613	75	AAEL000137,AAEL000291,AAEL000434,AAEL000986,AAEL001164,AAEL001752,AAEL002436,AAEL002464,AAEL002504,AAEL002737,AAEL002813,AAEL002825,AAEL002827,AAEL003192,AAEL003234,AAEL003393,AAEL003524,AAEL003675,AAEL004060,AAEL004124,AAEL004423,AAEL005008,AAEL005043,AAEL005143,AAEL005170,AAEL005610,AAEL005918,AAEL005946,AAEL006509,AAEL006516,AAEL006717,AAEL006800,AAEL007681,AAEL007752,AAEL008072,AAEL008232,AAE…	12.2	2.26	2.63	1.48005e-11	4.51416e-10	8.12548e-09
GO:0008324	cation transmembrane transporter activity	207	38	AAEL000137,AAEL000291,AAEL002436,AAEL002464,AAEL002504,AAEL002737,AAEL002813,AAEL002827,AAEL003234,AAEL003393,AAEL003675,AAEL004060,AAEL004423,AAEL005143,AAEL005170,AAEL005610,AAEL006509,AAEL006516,AAEL006800,AAEL007752,AAEL008697,AAEL008848,AAEL009257,AAEL009964,AAEL010801,AAEL010819,AAEL010823,AAEL012035,AAEL012113,AAEL012175,AAEL012740,AAEL013490,AAEL014944,AAEL018667,AAEL018685,AAEL019458,AAE…	18.4	3.38	4.12	2.37369e-11	6.8587e-10	1.30315e-08
GO:0051536	iron-sulfur cluster binding	51	17	AAEL001109,AAEL001501,AAEL003675,AAEL004234,AAEL004698,AAEL005508,AAEL006428,AAEL007681,AAEL008072,AAEL008216,AAEL010330,AAEL012552,AAEL014154,AAEL014379,AAEL025993,AAEL026806,AAEL027771,	33.3	6.14	8.94	6.4e-10	1.67314e-08	3.5136e-07
GO:0051540	metal cluster binding	51	17	AAEL001109,AAEL001501,AAEL003675,AAEL004234,AAEL004698,AAEL005508,AAEL006428,AAEL007681,AAEL008072,AAEL008216,AAEL010330,AAEL012552,AAEL014154,AAEL014379,AAEL025993,AAEL026806,AAEL027771,	33.3	6.14	8.94	6.4e-10	1.67314e-08	3.5136e-07
GO:0015252	proton channel activity	10	8	AAEL002504,AAEL002827,AAEL003393,AAEL004060,AAEL008848,AAEL010823,AAEL012175,AAEL020429,	80	14.75	70.66	2.92947e-09	6.99251e-08	1.60828e-06
GO:0046933	proton-transporting ATP synthase activity, rotational mechanism	10	8	AAEL002504,AAEL002827,AAEL003393,AAEL004060,AAEL008848,AAEL010823,AAEL012175,AAEL020429,	80	14.75	70.66	2.92947e-09	6.99251e-08	1.60828e-06
GO:0015075	ion transmembrane transporter activity	329	44	AAEL000137,AAEL000291,AAEL001752,AAEL002436,AAEL002464,AAEL002504,AAEL002737,AAEL002813,AAEL002827,AAEL003234,AAEL003393,AAEL003675,AAEL004060,AAEL004124,AAEL004423,AAEL005143,AAEL005170,AAEL005610,AAEL006509,AAEL006516,AAEL006800,AAEL007752,AAEL008697,AAEL008848,AAEL009257,AAEL009964,AAEL010801,AAEL010819,AAEL010823,AAEL012035,AAEL012113,AAEL012175,AAEL012740,AAEL013490,AAEL014944,AAEL018667,AAE…	13.4	2.47	2.82	2.28299e-08	5.22234e-07	1.25336e-05
GO:0015318	inorganic molecular entity transmembrane transporter activity	301	41	AAEL000137,AAEL000291,AAEL001752,AAEL002436,AAEL002464,AAEL002504,AAEL002737,AAEL002813,AAEL002827,AAEL003234,AAEL003393,AAEL003675,AAEL004060,AAEL004423,AAEL005143,AAEL005170,AAEL005610,AAEL006509,AAEL006516,AAEL006800,AAEL007752,AAEL008697,AAEL008848,AAEL009257,AAEL009964,AAEL010801,AAEL010819,AAEL010823,AAEL012035,AAEL012113,AAEL012175,AAEL012740,AAEL013490,AAEL014944,AAEL018667,AAEL018685,AAE…	13.6	2.51	2.88	4.15493e-08	9.12423e-07	2.28106e-05
GO:0051539	4 iron, 4 sulfur cluster binding	23	10	AAEL001501,AAEL004698,AAEL007681,AAEL008072,AAEL008216,AAEL010330,AAEL014154,AAEL025993,AAEL026806,AAEL027771,	43.5	8.01	13.62	1.23358e-07	2.60474e-06	6.77233e-05
GO:0022853	active ion transmembrane transporter activity	72	17	AAEL000137,AAEL002464,AAEL002737,AAEL003234,AAEL003675,AAEL005143,AAEL005170,AAEL006516,AAEL006800,AAEL007752,AAEL008697,AAEL009257,AAEL010801,AAEL012035,AAEL014944,AAEL018685,AAEL019458,	23.6	4.35	5.52	2.01642e-07	4.10005e-06	0.000110701
GO:0016874	ligase activity	111	20	AAEL000424,AAEL001887,AAEL002504,AAEL002827,AAEL003393,AAEL003994,AAEL004060,AAEL005552,AAEL005688,AAEL006833,AAEL008848,AAEL009340,AAEL009691,AAEL010640,AAEL010823,AAEL012175,AAEL017566,AAEL020429,AAEL024412,AAEL026393,	18	3.32	3.93	1.82818e-06	3.58454e-05	0.00100367
GO:0016829	lyase activity	104	19	AAEL001176,AAEL002304,AAEL002898,AAEL003246,AAEL005415,AAEL005766,AAEL006196,AAEL006693,AAEL008167,AAEL008216,AAEL010146,AAEL010223,AAEL014393,AAEL020936,AAEL024228,AAEL024350,AAEL025170,AAEL027199,AAEL027594,	18.3	3.37	3.99	2.66384e-06	5.04292e-05	0.00146245
GO:0004129	cytochrome-c oxidase activity	14	7	AAEL002737,AAEL003234,AAEL005170,AAEL007752,AAEL008697,AAEL009257,AAEL014944,	50	9.22	17.63	3.2813e-06	5.81108e-05	0.00180143
GO:0016675	oxidoreductase activity, acting on a heme group of donors	14	7	AAEL002737,AAEL003234,AAEL005170,AAEL007752,AAEL008697,AAEL009257,AAEL014944,	50	9.22	17.63	3.2813e-06	5.81108e-05	0.00180143
GO:0016679	oxidoreductase activity, acting on diphenols and related substances as donors	4	4	AAEL003675,AAEL005143,AAEL010801,AAEL018685,	100	18.43	inf	8.57949e-06	0.000142732	0.00471014
GO:0008121	ubiquinol-cytochrome-c reductase activity	4	4	AAEL003675,AAEL005143,AAEL010801,AAEL018685,	100	18.43	inf	8.57949e-06	0.000142732	0.00471014
GO:0016616	oxidoreductase activity, acting on the CH-OH group of donors, NAD or NADP as acceptor	35	10	AAEL000454,AAEL000746,AAEL005336,AAEL005790,AAEL006458,AAEL008166,AAEL009311,AAEL010146,AAEL010814,AAEL013904,	28.6	5.27	7.07	1.09409e-05	0.000176663	0.00600653
GO:0051537	2 iron, 2 sulfur cluster binding	22	8	AAEL001109,AAEL001501,AAEL003675,AAEL004234,AAEL005508,AAEL006428,AAEL010330,AAEL014379,	36.4	6.7	10.08	1.16218e-05	0.000182295	0.00638034
GO:0016903	oxidoreductase activity, acting on the aldehyde or oxo group of donors	47	11	AAEL001134,AAEL001737,AAEL001747,AAEL004338,AAEL005308,AAEL011756,AAEL012161,AAEL012427,AAEL014080,AAEL016984,AAEL027336,	23.4	4.31	5.41	3.18059e-05	0.000485041	0.0174615
GO:0016627	oxidoreductase activity, acting on the CH-CH group of donors	40	10	AAEL003125,AAEL003762,AAEL007555,AAEL008740,AAEL008841,AAEL008871,AAEL010330,AAEL010608,AAEL014797,AAEL025993,	25	4.61	5.89	3.94963e-05	0.00058604	0.0216835
GO:0042626	ATPase-coupled transmembrane transporter activity	50	11	AAEL000434,AAEL002464,AAEL005043,AAEL005918,AAEL006516,AAEL006717,AAEL009808,AAEL010047,AAEL012035,AAEL019458,AAEL027539,	22	4.06	4.99	5.88028e-05	0.000849546	0.0322827
GO:0036094	small molecule binding	1176	94	AAEL000434,AAEL000454,AAEL000746,AAEL000797,AAEL000999,AAEL001194,AAEL001887,AAEL002508,AAEL002703,AAEL002779,AAEL002810,AAEL002827,AAEL002874,AAEL003125,AAEL003393,AAEL003770,AAEL003994,AAEL004180,AAEL004563,AAEL004616,AAEL005043,AAEL005052,AAEL005289,AAEL005336,AAEL005552,AAEL005688,AAEL005790,AAEL005918,AAEL005964,AAEL006080,AAEL006179,AAEL006440,AAEL006617,AAEL006717,AAEL006833,AAEL006928,AAE…	8	1.47	1.61	6.13125e-05	0.000863092	0.0336606
GO:0016721	oxidoreductase activity, acting on superoxide radicals as acceptor	6	4	AAEL004823,AAEL019937,AAEL019938,AAEL025388,	66.7	12.29	35.09	0.000117841	0.00157792	0.0646948
GO:0004784	superoxide dismutase activity	6	4	AAEL004823,AAEL019937,AAEL019938,AAEL025388,	66.7	12.29	35.09	0.000117841	0.00157792	0.0646948
GO:0036402	proteasome-activating activity	3	3	AAEL012095,AAEL012943,AAEL025594,	100	18.43	inf	0.0001589	0.00198263	0.0872359
GO:0000104	succinate dehydrogenase activity	3	3	AAEL008871,AAEL010330,AAEL010608,	100	18.43	inf	0.0001589	0.00198263	0.0872359
GO:0048038	quinone binding	3	3	AAEL008072,AAEL011381,AAEL026806,	100	18.43	inf	0.0001589	0.00198263	0.0872359
GO:0016836	hydro-lyase activity	31	8	AAEL002304,AAEL002898,AAEL008167,AAEL008216,AAEL010146,AAEL020936,AAEL024228,AAEL027594,	25.8	4.76	6.13	0.00018571	0.00226566	0.101955
GO:0016853	isomerase activity	76	13	AAEL002331,AAEL002542,AAEL002874,AAEL004313,AAEL006070,AAEL007883,AAEL008367,AAEL010505,AAEL011627,AAEL011758,AAEL012272,AAEL013279,AAEL025082,	17.1	3.15	3.65	0.000200725	0.00230571	0.110198
GO:0000166	nucleotide binding	1105	87	AAEL000434,AAEL000454,AAEL000746,AAEL000797,AAEL000999,AAEL001887,AAEL002508,AAEL002703,AAEL002779,AAEL002810,AAEL002827,AAEL002874,AAEL003125,AAEL003393,AAEL003770,AAEL003994,AAEL004180,AAEL004563,AAEL004616,AAEL005043,AAEL005052,AAEL005336,AAEL005552,AAEL005688,AAEL005790,AAEL005918,AAEL005964,AAEL006080,AAEL006179,AAEL006440,AAEL006617,AAEL006717,AAEL006833,AAEL006928,AAEL007007,AAEL007555,AAE…	7.9	1.45	1.57	0.000201592	0.00230571	0.110674
GO:1901265	nucleoside phosphate binding	1105	87	AAEL000434,AAEL000454,AAEL000746,AAEL000797,AAEL000999,AAEL001887,AAEL002508,AAEL002703,AAEL002779,AAEL002810,AAEL002827,AAEL002874,AAEL003125,AAEL003393,AAEL003770,AAEL003994,AAEL004180,AAEL004563,AAEL004616,AAEL005043,AAEL005052,AAEL005336,AAEL005552,AAEL005688,AAEL005790,AAEL005918,AAEL005964,AAEL006080,AAEL006179,AAEL006440,AAEL006617,AAEL006717,AAEL006833,AAEL006928,AAEL007007,AAEL007555,AAE…	7.9	1.45	1.57	0.000201592	0.00230571	0.110674
GO:0016620	oxidoreductase activity, acting on the aldehyde or oxo group of donors, NAD or NADP as acceptor	41	9	AAEL001134,AAEL001737,AAEL001747,AAEL011756,AAEL012161,AAEL012427,AAEL014080,AAEL016984,AAEL027336,	22	4.05	4.96	0.000281131	0.00314981	0.154341
GO:0016835	carbon-oxygen lyase activity	34	8	AAEL002304,AAEL002898,AAEL008167,AAEL008216,AAEL010146,AAEL020936,AAEL024228,AAEL027594,	23.5	4.34	5.42	0.000370035	0.00406298	0.203149
GO:0008094	ATP-dependent activity, acting on DNA	36	8	AAEL000999,AAEL002810,AAEL003684,AAEL006080,AAEL007007,AAEL010086,AAEL011811,AAEL012546,	22.2	4.1	5.03	0.000560306	0.00591193	0.307608
GO:0003678	DNA helicase activity	28	7	AAEL000999,AAEL002810,AAEL003684,AAEL007007,AAEL010086,AAEL011811,AAEL012546,	25	4.61	5.87	0.000581502	0.00591193	0.319244
GO:0003755	peptidyl-prolyl cis-trans isomerase activity	28	7	AAEL004313,AAEL007883,AAEL008367,AAEL011758,AAEL012272,AAEL013279,AAEL025082,	25	4.61	5.87	0.000581502	0.00591193	0.319244
GO:0016859	cis-trans isomerase activity	28	7	AAEL004313,AAEL007883,AAEL008367,AAEL011758,AAEL012272,AAEL013279,AAEL025082,	25	4.61	5.87	0.000581502	0.00591193	0.319244
GO:0048037	obsolete cofactor binding	4	3	AAEL002703,AAEL005401,AAEL006833,	75	13.83	52.56	0.00060986	0.00608751	0.334813
GO:0051287	NAD binding	37	8	AAEL000454,AAEL000746,AAEL005336,AAEL005790,AAEL007681,AAEL011381,AAEL013904,AAEL016984,	21.6	3.99	4.86	0.000681425	0.0066804	0.374103
GO:0016614	oxidoreductase activity, acting on CH-OH group of donors	62	10	AAEL000454,AAEL000746,AAEL005336,AAEL005790,AAEL006458,AAEL008166,AAEL009311,AAEL010146,AAEL010814,AAEL013904,	16.1	2.97	3.39	0.0017084	0.0164546	0.937912
GO:0140657	ATP-dependent activity	233	24	AAEL000434,AAEL000999,AAEL002464,AAEL002810,AAEL003684,AAEL004563,AAEL005043,AAEL005918,AAEL006080,AAEL006516,AAEL006717,AAEL007007,AAEL009808,AAEL010047,AAEL010086,AAEL011289,AAEL011811,AAEL012035,AAEL012095,AAEL012546,AAEL012943,AAEL019458,AAEL025594,AAEL027539,	10.3	1.9	2.04	0.0018824	0.0178179	1
GO:0019829	ATPase-coupled cation transmembrane transporter activity	11	4	AAEL002464,AAEL006516,AAEL012035,AAEL019458,	36.4	6.7	10.02	0.00208311	0.0193835	1
GO:0032559	adenyl ribonucleotide binding	767	60	AAEL000434,AAEL000999,AAEL001887,AAEL002508,AAEL002779,AAEL002810,AAEL002827,AAEL003393,AAEL003770,AAEL003994,AAEL004563,AAEL004616,AAEL005043,AAEL005552,AAEL005688,AAEL005918,AAEL005964,AAEL006080,AAEL006440,AAEL006617,AAEL006717,AAEL007007,AAEL008320,AAEL008471,AAEL009185,AAEL009691,AAEL010047,AAEL010086,AAEL010585,AAEL010640,AAEL011197,AAEL011289,AAEL011703,AAEL011811,AAEL012095,AAEL012175,AAE…	7.8	1.44	1.53	0.00241182	0.0206812	1
GO:0030554	adenyl nucleotide binding	769	60	AAEL000434,AAEL000999,AAEL001887,AAEL002508,AAEL002779,AAEL002810,AAEL002827,AAEL003393,AAEL003770,AAEL003994,AAEL004563,AAEL004616,AAEL005043,AAEL005552,AAEL005688,AAEL005918,AAEL005964,AAEL006080,AAEL006440,AAEL006617,AAEL006717,AAEL007007,AAEL008320,AAEL008471,AAEL009185,AAEL009691,AAEL010047,AAEL010086,AAEL010585,AAEL010640,AAEL011197,AAEL011289,AAEL011703,AAEL011811,AAEL012095,AAEL012175,AAE…	7.8	1.44	1.53	0.00255968	0.0206812	1
GO:0016830	carbon-carbon lyase activity	27	6	AAEL001176,AAEL003246,AAEL005766,AAEL006693,AAEL010223,AAEL025170,	22.2	4.1	5.02	0.00276488	0.0206812	1
GO:0009678	pyrophosphate hydrolysis-driven proton transmembrane transporter activity	6	3	AAEL002464,AAEL006516,AAEL012035,	50	9.22	17.52	0.00280832	0.0206812	1
GO:0044769	ATPase activity, coupled to transmembrane movement of ions, rotational mechanism	6	3	AAEL002464,AAEL006516,AAEL012035,	50	9.22	17.52	0.00280832	0.0206812	1
GO:0050662	obsolete coenzyme binding	6	3	AAEL003019,AAEL009311,AAEL009414,	50	9.22	17.52	0.00280832	0.0206812	1
GO:0046961	proton-transporting ATPase activity, rotational mechanism	6	3	AAEL002464,AAEL006516,AAEL012035,	50	9.22	17.52	0.00280832	0.0206812	1
GO:0008308	voltage-gated anion channel activity	6	3	AAEL001752,AAEL022304,AAEL023176,	50	9.22	17.52	0.00280832	0.0206812	1
GO:0004448	isocitrate dehydrogenase activity	6	3	AAEL000454,AAEL000746,AAEL010814,	50	9.22	17.52	0.00280832	0.0206812	1
GO:0042625	ATPase-coupled ion transmembrane transporter activity	6	3	AAEL002464,AAEL006516,AAEL012035,	50	9.22	17.52	0.00280832	0.0206812	1
GO:0005524	ATP binding	757	59	AAEL000434,AAEL000999,AAEL001887,AAEL002508,AAEL002779,AAEL002810,AAEL002827,AAEL003393,AAEL003770,AAEL003994,AAEL004563,AAEL004616,AAEL005043,AAEL005552,AAEL005688,AAEL005918,AAEL005964,AAEL006080,AAEL006440,AAEL006617,AAEL006717,AAEL007007,AAEL008320,AAEL008471,AAEL009185,AAEL009691,AAEL010047,AAEL010086,AAEL010585,AAEL010640,AAEL011197,AAEL011289,AAEL011703,AAEL011811,AAEL012095,AAEL012175,AAE…	7.8	1.44	1.53	0.00284346	0.0206812	1
GO:0016832	aldehyde-lyase activity	2	2	AAEL003246,AAEL005766,	100	18.43	inf	0.00293832	0.0206812	1
GO:0008177	succinate dehydrogenase (ubiquinone) activity	2	2	AAEL010330,AAEL010608,	100	18.43	inf	0.00293832	0.0206812	1
GO:0004637	phosphoribosylamine-glycine ligase activity	2	2	AAEL010640,AAEL026393,	100	18.43	inf	0.00293832	0.0206812	1
GO:0004014	adenosylmethionine decarboxylase activity	2	2	AAEL001176,AAEL025170,	100	18.43	inf	0.00293832	0.0206812	1
GO:0004776	succinate-CoA ligase (GDP-forming) activity	2	2	AAEL005552,AAEL006833,	100	18.43	inf	0.00293832	0.0206812	1
GO:0004140	dephospho-CoA kinase activity	2	2	AAEL003770,AAEL013394,	100	18.43	inf	0.00293832	0.0206812	1
GO:0004325	ferrochelatase activity	2	2	AAEL005415,AAEL024350,	100	18.43	inf	0.00293832	0.0206812	1
GO:0042030	ATPase inhibitor activity	2	2	AAEL003417,AAEL004284,	100	18.43	inf	0.00293832	0.0206812	1
GO:0016776	phosphotransferase activity, phosphate group as acceptor	12	4	AAEL012359,AAEL012731,AAEL013814,AAEL027453,	33.3	6.14	8.77	0.00299166	0.0207902	1
GO:0043168	anion binding	1083	79	AAEL000434,AAEL000797,AAEL000999,AAEL001887,AAEL002508,AAEL002703,AAEL002779,AAEL002810,AAEL002827,AAEL003125,AAEL003393,AAEL003770,AAEL003994,AAEL004180,AAEL004563,AAEL004616,AAEL005043,AAEL005052,AAEL005289,AAEL005552,AAEL005688,AAEL005918,AAEL005964,AAEL006080,AAEL006179,AAEL006440,AAEL006617,AAEL006717,AAEL006928,AAEL007007,AAEL007555,AAEL007681,AAEL008320,AAEL008471,AAEL008841,AAEL009185,AAE…	7.3	1.34	1.43	0.00357584	0.0245392	1
GO:0016861	intramolecular oxidoreductase activity, interconverting aldoses and ketoses	7	3	AAEL002331,AAEL002542,AAEL011627,	42.9	7.9	13.14	0.00471719	0.0315822	1
GO:0005539	glycosaminoglycan binding	7	3	AAEL007039,AAEL010784,AAEL017056,	42.9	7.9	13.14	0.00471719	0.0315822	1
GO:0000287	magnesium ion binding	41	7	AAEL000454,AAEL000746,AAEL003193,AAEL005552,AAEL009748,AAEL012629,AAEL024228,	17.1	3.15	3.62	0.00599183	0.0396327	1
GO:0016790	thiolester hydrolase activity	8	3	AAEL001030,AAEL003746,AAEL024191,	37.5	6.91	10.51	0.00724528	0.0473531	1
GO:0016209	antioxidant activity	33	6	AAEL004823,AAEL011941,AAEL013528,AAEL019937,AAEL019938,AAEL025388,	18.2	3.35	3.9	0.00785123	0.0501606	1
GO:0004775	succinate-CoA ligase (ADP-forming) activity	3	2	AAEL005552,AAEL006833,	66.7	12.29	34.98	0.00849716	0.0501606	1
GO:0004738	pyruvate dehydrogenase activity	3	2	AAEL004338,AAEL005308,	66.7	12.29	34.98	0.00849716	0.0501606	1
GO:0140678	molecular function inhibitor activity	3	2	AAEL003417,AAEL004284,	66.7	12.29	34.98	0.00849716	0.0501606	1
GO:0016635	oxidoreductase activity, acting on the CH-CH group of donors, quinone or related compound as acceptor	3	2	AAEL010330,AAEL010608,	66.7	12.29	34.98	0.00849716	0.0501606	1
GO:0004739	pyruvate dehydrogenase (acetyl-transferring) activity	3	2	AAEL004338,AAEL005308,	66.7	12.29	34.98	0.00849716	0.0501606	1
GO:0016803	ether hydrolase activity	3	2	AAEL003666,AAEL011314,	66.7	12.29	34.98	0.00849716	0.0501606	1
GO:0004774	succinate-CoA ligase activity	3	2	AAEL005552,AAEL006833,	66.7	12.29	34.98	0.00849716	0.0501606	1
GO:0004449	isocitrate dehydrogenase (NAD+) activity	3	2	AAEL000454,AAEL010814,	66.7	12.29	34.98	0.00849716	0.0501606	1
GO:0016787	hydrolase activity	1527	103	AAEL000424,AAEL000434,AAEL000564,AAEL000999,AAEL001030,AAEL001194,AAEL001588,AAEL001649,AAEL001670,AAEL002401,AAEL002508,AAEL002810,AAEL003193,AAEL003213,AAEL003230,AAEL003363,AAEL003431,AAEL003492,AAEL003666,AAEL003684,AAEL003742,AAEL003746,AAEL003871,AAEL004308,AAEL004563,AAEL004733,AAEL005043,AAEL005052,AAEL005676,AAEL005830,AAEL005918,AAEL006061,AAEL006174,AAEL006179,AAEL006209,AAEL006441,AAE…	6.7	1.24	1.31	0.00973032	0.0568292	1
GO:0016709	oxidoreductase activity, acting on paired donors, with incorporation or reduction of molecular oxygen, NAD(P)H as one donor, and incorporation of one atom of oxygen	9	3	AAEL000797,AAEL004180,AAEL011379,	33.3	6.14	8.76	0.010434	0.0602974	1
GO:0003995	acyl-CoA dehydrogenase activity	10	3	AAEL003125,AAEL007555,AAEL014797,	30	5.53	7.5	0.0143122	0.0801778	1
GO:0016638	oxidoreductase activity, acting on the CH-NH2 group of donors	10	3	AAEL002703,AAEL010464,AAEL012674,	30	5.53	7.5	0.0143122	0.0801778	1
GO:0005253	anion channel activity	10	3	AAEL001752,AAEL022304,AAEL023176,	30	5.53	7.5	0.0143122	0.0801778	1
GO:0050660	flavin adenine dinucleotide binding	84	10	AAEL000797,AAEL003125,AAEL004180,AAEL006928,AAEL007555,AAEL008841,AAEL010608,AAEL012674,AAEL013739,AAEL014797,	11.9	2.19	2.38	0.0151634	0.0832473	1
GO:0140097	catalytic activity, acting on DNA	84	10	AAEL000999,AAEL002810,AAEL003684,AAEL006080,AAEL006209,AAEL007007,AAEL010086,AAEL011811,AAEL012546,AAEL017566,	11.9	2.19	2.38	0.0151634	0.0832473	1
GO:0004177	aminopeptidase activity	38	6	AAEL000424,AAEL001649,AAEL003666,AAEL008163,AAEL009764,AAEL019536,	15.8	2.91	3.29	0.0155753	0.0846616	1
GO:0042834	peptidoglycan binding	4	2	AAEL007039,AAEL017056,	50	9.22	17.49	0.0163845	0.0848591	1
GO:0016289	CoA hydrolase activity	4	2	AAEL003746,AAEL024191,	50	9.22	17.49	0.0163845	0.0848591	1
GO:0004550	nucleoside diphosphate kinase activity	4	2	AAEL012359,AAEL027453,	50	9.22	17.49	0.0163845	0.0848591	1
GO:0016878	acid-thiol ligase activity	4	2	AAEL005552,AAEL006833,	50	9.22	17.49	0.0163845	0.0848591	1
GO:0008410	CoA-transferase activity	4	2	AAEL003746,AAEL019780,	50	9.22	17.49	0.0163845	0.0848591	1
GO:0019842	vitamin binding	61	8	AAEL001194,AAEL005289,AAEL008160,AAEL009691,AAEL009748,AAEL009872,AAEL012579,AAEL014275,	13.1	2.42	2.65	0.016646	0.085408	1
GO:0016814	hydrolase activity, acting on carbon-nitrogen (but not peptide) bonds, in cyclic amidines	11	3	AAEL003213,AAEL005676,AAEL012825,	27.3	5.03	6.57	0.0188982	0.0960657	1
GO:0016417	S-acyltransferase activity	12	3	AAEL002764,AAEL004294,AAEL020769,	25	4.61	5.84	0.0242003	0.12189	1
GO:0016667	oxidoreductase activity, acting on a sulfur group of donors	21	4	AAEL001109,AAEL006928,AAEL009708,AAEL010777,	19	3.51	4.12	0.024553	0.122542	1
GO:0008409	5'-3' exonuclease activity	5	2	AAEL006209,AAEL029013,	40	7.37	11.66	0.026332	0.12681	1
GO:0016615	malate dehydrogenase activity	5	2	AAEL005790,AAEL008166,	40	7.37	11.66	0.026332	0.12681	1
GO:0016641	oxidoreductase activity, acting on the CH-NH2 group of donors, oxygen as acceptor	5	2	AAEL002703,AAEL012674,	40	7.37	11.66	0.026332	0.12681	1
GO:0016801	hydrolase activity, acting on ether bonds	5	2	AAEL003666,AAEL011314,	40	7.37	11.66	0.026332	0.12681	1
GO:0016879	ligase activity, forming carbon-nitrogen bonds	23	4	AAEL001887,AAEL009340,AAEL010640,AAEL026393,	17.4	3.21	3.69	0.0333642	0.132367	1
GO:0050661	NADP binding	23	4	AAEL000797,AAEL009311,AAEL013904,AAEL016984,	17.4	3.21	3.69	0.0333642	0.132367	1
GO:0016831	carboxy-lyase activity	23	4	AAEL001176,AAEL006693,AAEL010223,AAEL025170,	17.4	3.21	3.69	0.0333642	0.132367	1
GO:0015036	disulfide oxidoreductase activity	14	3	AAEL001109,AAEL009708,AAEL010777,	21.4	3.95	4.77	0.0369478	0.132367	1
GO:0016860	intramolecular oxidoreductase activity	14	3	AAEL002331,AAEL002542,AAEL011627,	21.4	3.95	4.77	0.0369478	0.132367	1
GO:0015035	protein-disulfide reductase activity	14	3	AAEL001109,AAEL009708,AAEL010777,	21.4	3.95	4.77	0.0369478	0.132367	1
GO:0016742	hydroxymethyl-, formyl- and related transferase activity	6	2	AAEL010640,AAEL012825,	33.3	6.14	8.74	0.0380939	0.132367	1
GO:0016854	racemase and epimerase activity	6	2	AAEL002874,AAEL010505,	33.3	6.14	8.74	0.0380939	0.132367	1
GO:0016624	oxidoreductase activity, acting on the aldehyde or oxo group of donors, disulfide as acceptor	6	2	AAEL004338,AAEL005308,	33.3	6.14	8.74	0.0380939	0.132367	1
GO:0046527	glucosyltransferase activity	6	2	AAEL004221,AAEL006438,	33.3	6.14	8.74	0.0380939	0.132367	1
GO:0016634	oxidoreductase activity, acting on the CH-CH group of donors, oxygen as acceptor	6	2	AAEL003762,AAEL008841,	33.3	6.14	8.74	0.0380939	0.132367	1
GO:0032553	ribonucleotide binding	948	64	AAEL000434,AAEL000999,AAEL001887,AAEL002508,AAEL002703,AAEL002779,AAEL002810,AAEL002827,AAEL003393,AAEL003770,AAEL003994,AAEL004563,AAEL004616,AAEL005043,AAEL005052,AAEL005552,AAEL005688,AAEL005918,AAEL005964,AAEL006080,AAEL006179,AAEL006440,AAEL006617,AAEL006717,AAEL007007,AAEL007681,AAEL008320,AAEL008471,AAEL009185,AAEL009691,AAEL010047,AAEL010086,AAEL010585,AAEL010640,AAEL011197,AAEL011289,AAE…	6.8	1.24	1.29	0.038146	0.132367	1
GO:0008238	exopeptidase activity	86	9	AAEL000424,AAEL001588,AAEL001649,AAEL003666,AAEL008163,AAEL009764,AAEL019536,AAEL023559,AAEL027166,	10.5	1.93	2.05	0.0429568	0.132367	1
GO:0008509	anion transmembrane transporter activity	48	6	AAEL001752,AAEL004124,AAEL022304,AAEL023176,AAEL024179,AAEL027034,	12.5	2.3	2.51	0.0440578	0.132367	1
GO:0008483	transaminase activity	15	3	AAEL005289,AAEL012579,AAEL026440,	20	3.69	4.38	0.0443737	0.132367	1
GO:0003684	damaged DNA binding	15	3	AAEL003684,AAEL003893,AAEL004562,	20	3.69	4.38	0.0443737	0.132367	1
GO:0016769	transferase activity, transferring nitrogenous groups	15	3	AAEL005289,AAEL012579,AAEL026440,	20	3.69	4.38	0.0443737	0.132367	1

## Sheet: 12hp_BP
ID	Name	Bgd count	Result count	Result gene list	Pct of bgd	Fold enrichment	Odds ratio	P-value	Benjamini	Bonferroni
GO:0019752	carboxylic acid metabolic process	207	23	AAEL000735,AAEL003188,AAEL003203,AAEL003729,AAEL004988,AAEL005229,AAEL005384,AAEL005422,AAEL008467,AAEL008468,AAEL008574,AAEL010276,AAEL011830,AAEL011957,AAEL012014,AAEL013431,AAEL013649,AAEL014238,AAEL014426,AAEL021106,AAEL025906,AAEL026069,AAEL029007,	11.1	3.57	4.1	1.13171e-07	3.15551e-05	7.26557e-05
GO:0043436	oxoacid metabolic process	208	23	AAEL000735,AAEL003188,AAEL003203,AAEL003729,AAEL004988,AAEL005229,AAEL005384,AAEL005422,AAEL008467,AAEL008468,AAEL008574,AAEL010276,AAEL011830,AAEL011957,AAEL012014,AAEL013431,AAEL013649,AAEL014238,AAEL014426,AAEL021106,AAEL025906,AAEL026069,AAEL029007,	11.1	3.56	4.08	1.2368e-07	3.15551e-05	7.94025e-05
GO:0006082	organic acid metabolic process	210	23	AAEL000735,AAEL003188,AAEL003203,AAEL003729,AAEL004988,AAEL005229,AAEL005384,AAEL005422,AAEL008467,AAEL008468,AAEL008574,AAEL010276,AAEL011830,AAEL011957,AAEL012014,AAEL013431,AAEL013649,AAEL014238,AAEL014426,AAEL021106,AAEL025906,AAEL026069,AAEL029007,	11	3.52	4.04	1.47454e-07	3.15551e-05	9.46652e-05
GO:0044281	small molecule metabolic process	400	33	AAEL000006,AAEL000025,AAEL000629,AAEL000735,AAEL001607,AAEL001845,AAEL003188,AAEL003203,AAEL003606,AAEL003729,AAEL004988,AAEL005229,AAEL005384,AAEL005422,AAEL005706,AAEL005749,AAEL005763,AAEL008467,AAEL008468,AAEL008574,AAEL010276,AAEL011830,AAEL011957,AAEL012014,AAEL013431,AAEL013649,AAEL014238,AAEL014287,AAEL014426,AAEL021106,AAEL025906,AAEL026069,AAEL029007,	8.3	2.65	2.99	2.88234e-07	4.62616e-05	0.000185046
GO:0008152	metabolic process	3712	156	AAEL000006,AAEL000025,AAEL000143,AAEL000147,AAEL000223,AAEL000629,AAEL000735,AAEL000840,AAEL001088,AAEL001205,AAEL001231,AAEL001593,AAEL001607,AAEL001674,AAEL001690,AAEL001830,AAEL001845,AAEL001878,AAEL001940,AAEL002288,AAEL002581,AAEL002661,AAEL002978,AAEL003157,AAEL003188,AAEL003203,AAEL003237,AAEL003271,AAEL003497,AAEL003606,AAEL003729,AAEL003731,AAEL003896,AAEL003953,AAEL004126,AAEL004127,AAE…	4.2	1.35	1.67	2.66222e-06	0.000341829	0.00170914
GO:0044255	cellular lipid metabolic process	169	18	AAEL000735,AAEL000840,AAEL001940,AAEL003203,AAEL003497,AAEL005229,AAEL006987,AAEL007809,AAEL008061,AAEL008574,AAEL011353,AAEL011898,AAEL011957,AAEL013649,AAEL020132,AAEL024423,AAEL026069,AAEL029007,	10.7	3.43	3.86	5.0873e-06	0.000544341	0.00326605
GO:0044282	small molecule catabolic process	45	9	AAEL000735,AAEL001607,AAEL003729,AAEL005422,AAEL008574,AAEL010276,AAEL013431,AAEL014426,AAEL025906,	20	6.43	7.97	8.05548e-06	0.000738803	0.00517162
GO:0016054	organic acid catabolic process	27	7	AAEL000735,AAEL003729,AAEL005422,AAEL008574,AAEL010276,AAEL013431,AAEL014426,	25.9	8.34	11.11	1.37086e-05	0.00097788	0.00880092
GO:0046395	carboxylic acid catabolic process	27	7	AAEL000735,AAEL003729,AAEL005422,AAEL008574,AAEL010276,AAEL013431,AAEL014426,	25.9	8.34	11.11	1.37086e-05	0.00097788	0.00880092
GO:0006629	lipid metabolic process	275	23	AAEL000735,AAEL000840,AAEL001878,AAEL001940,AAEL003203,AAEL003497,AAEL004126,AAEL005229,AAEL005706,AAEL006987,AAEL007809,AAEL008061,AAEL008574,AAEL010678,AAEL011353,AAEL011898,AAEL011957,AAEL013649,AAEL020132,AAEL022520,AAEL024423,AAEL026069,AAEL029007,	8.4	2.69	2.98	1.55963e-05	0.00100128	0.0100128
GO:0009065	glutamine family amino acid catabolic process	3	3	AAEL003729,AAEL005422,AAEL013431,	100	32.17	inf	2.9797e-05	0.00173906	0.0191297
GO:0032787	monocarboxylic acid metabolic process	67	10	AAEL000735,AAEL003203,AAEL004988,AAEL005229,AAEL008574,AAEL011957,AAEL013649,AAEL025906,AAEL026069,AAEL029007,	14.9	4.8	5.6	3.79361e-05	0.00202958	0.024355
GO:0006796	phosphate-containing compound metabolic process	618	38	AAEL000629,AAEL000840,AAEL001593,AAEL001940,AAEL003237,AAEL003606,AAEL003731,AAEL003896,AAEL003953,AAEL004988,AAEL005384,AAEL006987,AAEL007284,AAEL007544,AAEL007642,AAEL007876,AAEL008061,AAEL008622,AAEL010711,AAEL011353,AAEL011898,AAEL014287,AAEL014763,AAEL014842,AAEL018059,AAEL019404,AAEL019566,AAEL019577,AAEL019616,AAEL019668,AAEL020132,AAEL020291,AAEL020987,AAEL022443,AAEL022827,AAEL024423,AAE…	6.1	1.98	2.17	4.23699e-05	0.00209242	0.0272014
GO:0006793	phosphorus metabolic process	622	38	AAEL000629,AAEL000840,AAEL001593,AAEL001940,AAEL003237,AAEL003606,AAEL003731,AAEL003896,AAEL003953,AAEL004988,AAEL005384,AAEL006987,AAEL007284,AAEL007544,AAEL007642,AAEL007876,AAEL008061,AAEL008622,AAEL010711,AAEL011353,AAEL011898,AAEL014287,AAEL014763,AAEL014842,AAEL018059,AAEL019404,AAEL019566,AAEL019577,AAEL019616,AAEL019668,AAEL020132,AAEL020291,AAEL020987,AAEL022443,AAEL022827,AAEL024423,AAE…	6.1	1.97	2.16	4.87055e-05	0.00215016	0.0312689
GO:1901605	alpha-amino acid metabolic process	56	9	AAEL003729,AAEL005384,AAEL005422,AAEL008467,AAEL008468,AAEL010276,AAEL011830,AAEL013431,AAEL014426,	16.1	5.17	6.1	5.09538e-05	0.00215016	0.0327124
GO:0006631	fatty acid metabolic process	44	8	AAEL000735,AAEL003203,AAEL005229,AAEL008574,AAEL011957,AAEL013649,AAEL026069,AAEL029007,	18.2	5.85	7.07	5.35865e-05	0.00215016	0.0344025
GO:0008610	lipid biosynthetic process	125	13	AAEL001940,AAEL003203,AAEL003497,AAEL004126,AAEL005229,AAEL008061,AAEL011353,AAEL011898,AAEL011957,AAEL013649,AAEL020132,AAEL024423,AAEL026069,	10.4	3.35	3.72	0.00013403	0.00506161	0.0860474
GO:1901606	alpha-amino acid catabolic process	18	5	AAEL003729,AAEL005422,AAEL010276,AAEL013431,AAEL014426,	27.8	8.93	12.15	0.000173067	0.00617273	0.111109
GO:0044283	small molecule biosynthetic process	99	11	AAEL000006,AAEL000025,AAEL001845,AAEL003203,AAEL005229,AAEL008467,AAEL008468,AAEL011830,AAEL011957,AAEL013649,AAEL026069,	11.1	3.57	3.99	0.000244256	0.00770266	0.156812
GO:0071704	organic substance metabolic process	3037	124	AAEL000006,AAEL000025,AAEL000147,AAEL000223,AAEL000629,AAEL000735,AAEL000840,AAEL001088,AAEL001205,AAEL001231,AAEL001593,AAEL001607,AAEL001674,AAEL001690,AAEL001830,AAEL001845,AAEL001878,AAEL001940,AAEL002288,AAEL002581,AAEL002661,AAEL002978,AAEL003157,AAEL003188,AAEL003203,AAEL003237,AAEL003271,AAEL003497,AAEL003606,AAEL003729,AAEL003731,AAEL003896,AAEL003953,AAEL004126,AAEL004931,AAEL004988,AAE…	4.1	1.31	1.51	0.000249286	0.00770266	0.160042
GO:0009069	serine family amino acid metabolic process	11	4	AAEL008467,AAEL008468,AAEL010276,AAEL014426,	36.4	11.7	18.01	0.000254774	0.00770266	0.163565
GO:0044238	primary metabolic process	2834	117	AAEL000006,AAEL000025,AAEL000223,AAEL000629,AAEL000735,AAEL000840,AAEL001088,AAEL001205,AAEL001231,AAEL001593,AAEL001607,AAEL001674,AAEL001690,AAEL001830,AAEL001878,AAEL001940,AAEL002288,AAEL002581,AAEL002661,AAEL002978,AAEL003157,AAEL003203,AAEL003237,AAEL003271,AAEL003497,AAEL003606,AAEL003729,AAEL003731,AAEL003896,AAEL003953,AAEL004126,AAEL004931,AAEL004988,AAEL005188,AAEL005229,AAEL005384,AAE…	4.1	1.33	1.52	0.000263954	0.00770266	0.169459
GO:0009063	cellular amino acid catabolic process	20	5	AAEL003729,AAEL005422,AAEL010276,AAEL013431,AAEL014426,	25	8.04	10.53	0.000297522	0.00810641	0.191009
GO:0005975	carbohydrate metabolic process	191	16	AAEL000006,AAEL000025,AAEL000223,AAEL001593,AAEL001607,AAEL004931,AAEL004988,AAEL005188,AAEL005749,AAEL005763,AAEL010037,AAEL012014,AAEL015020,AAEL015573,AAEL021375,AAEL027354,	8.4	2.69	2.94	0.000303043	0.00810641	0.194554
GO:0055114	obsolete oxidation-reduction process	671	37	AAEL000735,AAEL001593,AAEL001845,AAEL002581,AAEL003203,AAEL003729,AAEL004126,AAEL004127,AAEL004941,AAEL005422,AAEL005732,AAEL006044,AAEL006733,AAEL007023,AAEL007523,AAEL007526,AAEL007830,AAEL008099,AAEL008574,AAEL009128,AAEL012014,AAEL013225,AAEL013389,AAEL013407,AAEL013431,AAEL013980,AAEL014426,AAEL014840,AAEL014890,AAEL018662,AAEL018664,AAEL018669,AAEL018678,AAEL018680,AAEL023523,AAEL026142,AAE…	5.5	1.77	1.92	0.000477032	0.0122502	0.306255
GO:0044237	cellular metabolic process	2282	96	AAEL000147,AAEL000629,AAEL000735,AAEL000840,AAEL001088,AAEL001205,AAEL001593,AAEL001830,AAEL001845,AAEL001940,AAEL002581,AAEL003157,AAEL003188,AAEL003203,AAEL003237,AAEL003271,AAEL003497,AAEL003606,AAEL003729,AAEL003731,AAEL003896,AAEL003953,AAEL004988,AAEL005229,AAEL005384,AAEL005422,AAEL005539,AAEL005774,AAEL006987,AAEL007049,AAEL007284,AAEL007526,AAEL007544,AAEL007642,AAEL007692,AAEL007809,AAE…	4.2	1.35	1.51	0.000649539	0.0160386	0.417004
GO:0046394	carboxylic acid biosynthetic process	64	8	AAEL003203,AAEL005229,AAEL008467,AAEL008468,AAEL011830,AAEL011957,AAEL013649,AAEL026069,	12.5	4.02	4.53	0.000779905	0.0185444	0.500699
GO:0016053	organic acid biosynthetic process	65	8	AAEL003203,AAEL005229,AAEL008467,AAEL008468,AAEL011830,AAEL011957,AAEL013649,AAEL026069,	12.3	3.96	4.45	0.000865766	0.0189804	0.555822
GO:0006562	proline catabolic process	2	2	AAEL005422,AAEL013431,	100	32.17	inf	0.000963841	0.0189804	0.618786
GO:0019343	cysteine biosynthetic process via cystathionine	2	2	AAEL008467,AAEL008468,	100	32.17	inf	0.000963841	0.0189804	0.618786
GO:0006535	cysteine biosynthetic process from serine	2	2	AAEL008467,AAEL008468,	100	32.17	inf	0.000963841	0.0189804	0.618786
GO:0019344	cysteine biosynthetic process	2	2	AAEL008467,AAEL008468,	100	32.17	inf	0.000963841	0.0189804	0.618786
GO:1901575	organic substance catabolic process	254	18	AAEL000735,AAEL001205,AAEL001593,AAEL001607,AAEL003157,AAEL003729,AAEL004988,AAEL005422,AAEL005706,AAEL007049,AAEL008574,AAEL010249,AAEL010276,AAEL013203,AAEL013431,AAEL014426,AAEL025906,AAEL027209,	7.1	2.28	2.45	0.000975627	0.0189804	0.626352
GO:0009056	catabolic process	276	19	AAEL000735,AAEL001205,AAEL001593,AAEL001607,AAEL003157,AAEL003729,AAEL004988,AAEL005422,AAEL005706,AAEL007049,AAEL008574,AAEL010249,AAEL010276,AAEL013203,AAEL013407,AAEL013431,AAEL014426,AAEL025906,AAEL027209,	6.9	2.21	2.38	0.0010064	0.0190031	0.646106
GO:0019318	hexose metabolic process	26	5	AAEL000006,AAEL000025,AAEL001607,AAEL005749,AAEL005763,	19.2	6.19	7.51	0.0010829	0.0198635	0.695222
GO:0005996	monosaccharide metabolic process	28	5	AAEL000006,AAEL000025,AAEL001607,AAEL005749,AAEL005763,	17.9	5.74	6.86	0.00153757	0.02742	0.98712
GO:0009064	glutamine family amino acid metabolic process	18	4	AAEL003729,AAEL005384,AAEL005422,AAEL013431,	22.2	7.15	9	0.00198809	0.034496	1
GO:0000097	sulfur amino acid biosynthetic process	9	3	AAEL008467,AAEL008468,AAEL011830,	33.3	10.72	15.71	0.00217636	0.0367691	1
GO:0044248	cellular catabolic process	212	15	AAEL000735,AAEL001205,AAEL003157,AAEL003729,AAEL005422,AAEL007049,AAEL008574,AAEL010249,AAEL010276,AAEL013203,AAEL013407,AAEL013431,AAEL014426,AAEL025906,AAEL027209,	7.1	2.28	2.44	0.00256598	0.0418619	1
GO:0006536	glutamate metabolic process	3	2	AAEL003729,AAEL005422,	66.7	21.44	62.69	0.00283193	0.0418619	1
GO:0006534	cysteine metabolic process	3	2	AAEL008467,AAEL008468,	66.7	21.44	62.69	0.00283193	0.0418619	1
GO:0006546	glycine catabolic process	3	2	AAEL010276,AAEL014426,	66.7	21.44	62.69	0.00283193	0.0418619	1
GO:0009071	serine family amino acid catabolic process	3	2	AAEL010276,AAEL014426,	66.7	21.44	62.69	0.00283193	0.0418619	1
GO:0071103	DNA conformation change	133	11	AAEL017186,AAEL018018,AAEL019404,AAEL020911,AAEL022528,AAEL022644,AAEL024313,AAEL025042,AAEL026417,AAEL027845,AAEL027993,	8.3	2.66	2.87	0.00286904	0.0418619	1
GO:0006119	oxidative phosphorylation	20	4	AAEL018662,AAEL018669,AAEL018678,AAEL018680,	20	6.43	7.87	0.00299712	0.0427589	1
GO:0022904	respiratory electron transport chain	21	4	AAEL007526,AAEL018669,AAEL018678,AAEL018680,	19	6.13	7.41	0.00361276	0.0504216	1
GO:0000096	sulfur amino acid metabolic process	11	3	AAEL008467,AAEL008468,AAEL011830,	27.3	8.77	11.78	0.00408152	0.0553263	1
GO:0072330	monocarboxylic acid biosynthetic process	35	5	AAEL003203,AAEL005229,AAEL011957,AAEL013649,AAEL026069,	14.3	4.6	5.26	0.00425209	0.0553263	1
GO:0006633	fatty acid biosynthetic process	35	5	AAEL003203,AAEL005229,AAEL011957,AAEL013649,AAEL026069,	14.3	4.6	5.26	0.00425209	0.0553263	1
GO:0044272	sulfur compound biosynthetic process	22	4	AAEL008105,AAEL008467,AAEL008468,AAEL011830,	18.2	5.85	7	0.0043089	0.0553263	1
GO:0006520	cellular amino acid metabolic process	123	10	AAEL003729,AAEL005384,AAEL005422,AAEL008467,AAEL008468,AAEL010276,AAEL011830,AAEL013431,AAEL014238,AAEL014426,	8.1	2.62	2.81	0.00495676	0.0621207	1
GO:0022900	electron transport chain	68	7	AAEL007526,AAEL013980,AAEL018662,AAEL018664,AAEL018669,AAEL018678,AAEL018680,	10.3	3.31	3.63	0.00503158	0.0621207	1
GO:0006644	phospholipid metabolic process	87	8	AAEL000840,AAEL001940,AAEL006987,AAEL008061,AAEL011353,AAEL011898,AAEL020132,AAEL024423,	9.2	2.96	3.21	0.00556207	0.0673745	1
GO:0009126	purine nucleoside monophosphate metabolic process	14	3	AAEL000629,AAEL003606,AAEL005384,	21.4	6.89	8.57	0.00840215	0.098076	1
GO:0030258	lipid modification	14	3	AAEL000735,AAEL000840,AAEL008574,	21.4	6.89	8.57	0.00840215	0.098076	1
GO:0006334	nucleosome assembly	94	8	AAEL018018,AAEL020911,AAEL022528,AAEL022644,AAEL024313,AAEL026417,AAEL027845,AAEL027993,	8.5	2.74	2.94	0.0087954	0.0984312	1
GO:0006189	'de novo' IMP biosynthetic process	5	2	AAEL003606,AAEL005384,	40	12.87	20.89	0.00905614	0.0984312	1
GO:0006013	mannose metabolic process	5	2	AAEL005749,AAEL005763,	40	12.87	20.89	0.00905614	0.0984312	1
GO:0016255	attachment of GPI anchor to protein	5	2	AAEL011353,AAEL024423,	40	12.87	20.89	0.00905614	0.0984312	1
GO:0006468	protein phosphorylation	244	15	AAEL003731,AAEL003896,AAEL003953,AAEL007284,AAEL007544,AAEL007642,AAEL007876,AAEL008622,AAEL010711,AAEL018059,AAEL019566,AAEL019616,AAEL019668,AAEL020291,AAEL022443,	6.1	1.98	2.09	0.00929221	0.0984312	1
GO:0031497	chromatin assembly	95	8	AAEL018018,AAEL020911,AAEL022528,AAEL022644,AAEL024313,AAEL026417,AAEL027845,AAEL027993,	8.4	2.71	2.91	0.0093525	0.0984312	1
GO:0008150	biological process	5926	206	AAEL000006,AAEL000025,AAEL000090,AAEL000143,AAEL000147,AAEL000214,AAEL000223,AAEL000629,AAEL000735,AAEL000840,AAEL001088,AAEL001205,AAEL001231,AAEL001544,AAEL001593,AAEL001607,AAEL001616,AAEL001674,AAEL001690,AAEL001830,AAEL001845,AAEL001878,AAEL001940,AAEL002288,AAEL002581,AAEL002661,AAEL002978,AAEL003003,AAEL003136,AAEL003157,AAEL003188,AAEL003203,AAEL003237,AAEL003264,AAEL003271,AAEL003497,AAE…	3.5	1.12	1.3	0.00966613	0.0992668	1
GO:0008654	phospholipid biosynthetic process	59	6	AAEL001940,AAEL008061,AAEL011353,AAEL011898,AAEL020132,AAEL024423,	10.2	3.27	3.57	0.00974113	0.0992668	1
GO:0006333	chromatin assembly or disassembly	96	8	AAEL018018,AAEL020911,AAEL022528,AAEL022644,AAEL024313,AAEL026417,AAEL027845,AAEL027993,	8.3	2.68	2.88	0.00993549	0.0995897	1
GO:0006302	double-strand break repair	15	3	AAEL002581,AAEL011254,AAEL019404,	20	6.43	7.85	0.010264	0.0995897	1
GO:0036211	protein modification process	672	32	AAEL001088,AAEL001205,AAEL001830,AAEL003237,AAEL003271,AAEL003731,AAEL003896,AAEL003953,AAEL005774,AAEL007284,AAEL007544,AAEL007642,AAEL007809,AAEL007876,AAEL008061,AAEL008622,AAEL010711,AAEL011353,AAEL011865,AAEL011969,AAEL013203,AAEL014763,AAEL018059,AAEL019566,AAEL019616,AAEL019668,AAEL020291,AAEL020987,AAEL022443,AAEL022827,AAEL024423,AAEL027209,	4.8	1.53	1.62	0.0105312	0.0995897	1
GO:0006464	cellular protein modification process	672	32	AAEL001088,AAEL001205,AAEL001830,AAEL003237,AAEL003271,AAEL003731,AAEL003896,AAEL003953,AAEL005774,AAEL007284,AAEL007544,AAEL007642,AAEL007809,AAEL007876,AAEL008061,AAEL008622,AAEL010711,AAEL011353,AAEL011865,AAEL011969,AAEL013203,AAEL014763,AAEL018059,AAEL019566,AAEL019616,AAEL019668,AAEL020291,AAEL020987,AAEL022443,AAEL022827,AAEL024423,AAEL027209,	4.8	1.53	1.62	0.0105312	0.0995897	1
GO:0006869	lipid transport	60	6	AAEL009955,AAEL018103,AAEL023558,AAEL023632,AAEL026175,AAEL026962,	10	3.22	3.51	0.0105484	0.0995897	1
GO:0034728	nucleosome organization	98	8	AAEL018018,AAEL020911,AAEL022528,AAEL022644,AAEL024313,AAEL026417,AAEL027845,AAEL027993,	8.2	2.63	2.81	0.0111819	0.100502	1
GO:0045333	cellular respiration	44	5	AAEL007526,AAEL018662,AAEL018669,AAEL018678,AAEL018680,	11.4	3.66	4.04	0.011337	0.100502	1
GO:0065004	protein-DNA complex assembly	99	8	AAEL018018,AAEL020911,AAEL022528,AAEL022644,AAEL024313,AAEL026417,AAEL027845,AAEL027993,	8.1	2.6	2.78	0.0118468	0.100502	1
GO:0010876	lipid localization	62	6	AAEL009955,AAEL018103,AAEL023558,AAEL023632,AAEL026175,AAEL026962,	9.7	3.11	3.38	0.0123034	0.100502	1
GO:0016310	phosphorylation	350	19	AAEL000629,AAEL003731,AAEL003896,AAEL003953,AAEL004988,AAEL007284,AAEL007544,AAEL007642,AAEL007876,AAEL008622,AAEL010711,AAEL018059,AAEL019404,AAEL019566,AAEL019577,AAEL019616,AAEL019668,AAEL020291,AAEL022443,	5.4	1.75	1.83	0.0131634	0.100502	1
GO:0019637	organophosphate metabolic process	231	14	AAEL000629,AAEL000840,AAEL001593,AAEL001940,AAEL003606,AAEL004988,AAEL005384,AAEL006987,AAEL008061,AAEL011353,AAEL011898,AAEL014287,AAEL020132,AAEL024423,	6.1	1.95	2.05	0.0131923	0.100502	1
GO:0043624	cellular protein complex disassembly	6	2	AAEL001616,AAEL003957,	33.3	10.72	15.67	0.0133064	0.100502	1
GO:0006563	L-serine metabolic process	6	2	AAEL008467,AAEL008468,	33.3	10.72	15.67	0.0133064	0.100502	1
GO:0006635	fatty acid beta-oxidation	6	2	AAEL000735,AAEL008574,	33.3	10.72	15.67	0.0133064	0.100502	1
GO:0006544	glycine metabolic process	6	2	AAEL010276,AAEL014426,	33.3	10.72	15.67	0.0133064	0.100502	1
GO:0006560	proline metabolic process	6	2	AAEL005422,AAEL013431,	33.3	10.72	15.67	0.0133064	0.100502	1
GO:0046040	IMP metabolic process	6	2	AAEL003606,AAEL005384,	33.3	10.72	15.67	0.0133064	0.100502	1
GO:0006188	IMP biosynthetic process	6	2	AAEL003606,AAEL005384,	33.3	10.72	15.67	0.0133064	0.100502	1
GO:0019395	fatty acid oxidation	6	2	AAEL000735,AAEL008574,	33.3	10.72	15.67	0.0133064	0.100502	1
GO:0072329	monocarboxylic acid catabolic process	6	2	AAEL000735,AAEL008574,	33.3	10.72	15.67	0.0133064	0.100502	1
GO:0034440	lipid oxidation	6	2	AAEL000735,AAEL008574,	33.3	10.72	15.67	0.0133064	0.100502	1
GO:0009062	fatty acid catabolic process	6	2	AAEL000735,AAEL008574,	33.3	10.72	15.67	0.0133064	0.100502	1
GO:0006790	sulfur compound metabolic process	46	5	AAEL008105,AAEL008467,AAEL008468,AAEL010360,AAEL011830,	10.9	3.5	3.84	0.0136092	0.101594	1
GO:0006323	DNA packaging	102	8	AAEL018018,AAEL020911,AAEL022528,AAEL022644,AAEL024313,AAEL026417,AAEL027845,AAEL027993,	7.8	2.52	2.69	0.014016	0.103429	1
GO:0071824	protein-DNA complex subunit organization	103	8	AAEL018018,AAEL020911,AAEL022528,AAEL022644,AAEL024313,AAEL026417,AAEL027845,AAEL027993,	7.8	2.5	2.66	0.0147996	0.10797	1
GO:0009161	ribonucleoside monophosphate metabolic process	18	3	AAEL000629,AAEL003606,AAEL005384,	16.7	5.36	6.28	0.0171847	0.123325	1
GO:0046364	monosaccharide biosynthetic process	7	2	AAEL000006,AAEL000025,	28.6	9.19	12.53	0.018249	0.123325	1
GO:0009070	serine family amino acid biosynthetic process	7	2	AAEL008467,AAEL008468,	28.6	9.19	12.53	0.018249	0.123325	1
GO:0019319	hexose biosynthetic process	7	2	AAEL000006,AAEL000025,	28.6	9.19	12.53	0.018249	0.123325	1
GO:0006094	gluconeogenesis	7	2	AAEL000006,AAEL000025,	28.6	9.19	12.53	0.018249	0.123325	1
GO:0032984	protein-containing complex disassembly	7	2	AAEL001616,AAEL003957,	28.6	9.19	12.53	0.018249	0.123325	1
GO:0043648	dicarboxylic acid metabolic process	7	2	AAEL003729,AAEL005422,	28.6	9.19	12.53	0.018249	0.123325	1
GO:0015980	energy derivation by oxidation of organic compounds	50	5	AAEL007526,AAEL018662,AAEL018669,AAEL018678,AAEL018680,	10	3.22	3.5	0.0190319	0.127276	1
GO:0043933	protein-containing complex subunit organization	219	13	AAEL001616,AAEL003264,AAEL003957,AAEL018018,AAEL020911,AAEL022528,AAEL022644,AAEL022698,AAEL023781,AAEL024313,AAEL026417,AAEL027845,AAEL027993,	5.9	1.91	2	0.0193487	0.128061	1
GO:0016311	dephosphorylation	110	8	AAEL000840,AAEL003237,AAEL014763,AAEL014842,AAEL020987,AAEL022827,AAEL029070,AAEL029071,	7.3	2.34	2.48	0.0211993	0.138877	1
GO:0009167	purine ribonucleoside monophosphate metabolic process	20	3	AAEL000629,AAEL003606,AAEL005384,	15	4.82	5.54	0.0229372	0.144634	1
GO:0032200	telomere organization	8	2	AAEL017186,AAEL019404,	25	8.04	10.44	0.023837	0.144634	1
GO:0000723	telomere maintenance	8	2	AAEL017186,AAEL019404,	25	8.04	10.44	0.023837	0.144634	1
GO:0046034	ATP metabolic process	53	5	AAEL004988,AAEL018662,AAEL018669,AAEL018678,AAEL018680,	9.4	3.03	3.28	0.0239185	0.144634	1
GO:0006338	chromatin remodeling	113	8	AAEL018018,AAEL020911,AAEL022528,AAEL022644,AAEL024313,AAEL026417,AAEL027845,AAEL027993,	7.1	2.28	2.41	0.0244664	0.144634	1
GO:0007015	actin filament organization	21	3	AAEL001544,AAEL003957,AAEL019465,	14.3	4.6	5.23	0.0261579	0.144634	1
GO:0030036	actin cytoskeleton organization	37	4	AAEL001544,AAEL003957,AAEL010061,AAEL019465,	10.8	3.48	3.81	0.0270462	0.144634	1
GO:0006091	generation of precursor metabolites and energy	116	8	AAEL004988,AAEL007526,AAEL013980,AAEL018662,AAEL018664,AAEL018669,AAEL018678,AAEL018680,	6.9	2.22	2.34	0.0280712	0.144634	1
GO:0030029	actin filament-based process	38	4	AAEL001544,AAEL003957,AAEL010061,AAEL019465,	10.5	3.39	3.7	0.0295111	0.144634	1
GO:0006650	glycerophospholipid metabolic process	56	5	AAEL000840,AAEL001940,AAEL008061,AAEL011353,AAEL024423,	8.9	2.87	3.09	0.0295484	0.144634	1
GO:0006006	glucose metabolic process	9	2	AAEL000006,AAEL000025,	22.2	7.15	8.95	0.0300257	0.144634	1
GO:0022411	cellular component disassembly	9	2	AAEL001616,AAEL003957,	22.2	7.15	8.95	0.0300257	0.144634	1
GO:0006103	2-oxoglutarate metabolic process	1	1	AAEL003729,	100	32.17	inf	0.0310895	0.144634	1
GO:0019320	hexose catabolic process	1	1	AAEL001607,	100	32.17	inf	0.0310895	0.144634	1
GO:0051261	protein depolymerization	1	1	AAEL003957,	100	32.17	inf	0.0310895	0.144634	1
GO:0033499	galactose catabolic process via UDP-galactose	1	1	AAEL001607,	100	32.17	inf	0.0310895	0.144634	1
GO:0035494	SNARE complex disassembly	1	1	AAEL001616,	100	32.17	inf	0.0310895	0.144634	1
GO:0051127	positive regulation of actin nucleation	1	1	AAEL019465,	100	32.17	inf	0.0310895	0.144634	1
GO:0036085	GDP-fucose import into Golgi lumen	1	1	AAEL007481,	100	32.17	inf	0.0310895	0.144634	1
GO:0015783	GDP-fucose transmembrane transport	1	1	AAEL007481,	100	32.17	inf	0.0310895	0.144634	1
GO:0019388	galactose catabolic process	1	1	AAEL001607,	100	32.17	inf	0.0310895	0.144634	1
GO:0048013	ephrin receptor signaling pathway	1	1	AAEL010711,	100	32.17	inf	0.0310895	0.144634	1
GO:0010133	proline catabolic process to glutamate	1	1	AAEL005422,	100	32.17	inf	0.0310895	0.144634	1
GO:0046041	ITP metabolic process	1	1	AAEL000629,	100	32.17	inf	0.0310895	0.144634	1
GO:0006538	glutamate catabolic process	1	1	AAEL003729,	100	32.17	inf	0.0310895	0.144634	1
GO:0006481	C-terminal protein methylation	1	1	AAEL011969,	100	32.17	inf	0.0310895	0.144634	1
GO:0061727	methylglyoxal catabolic process to lactate	1	1	AAEL025906,	100	32.17	inf	0.0310895	0.144634	1
GO:0090480	purine nucleotide-sugar transmembrane transport	1	1	AAEL007481,	100	32.17	inf	0.0310895	0.144634	1
GO:0019243	methylglyoxal catabolic process to D-lactate via S-lactoyl-glutathione	1	1	AAEL025906,	100	32.17	inf	0.0310895	0.144634	1
GO:0043687	post-translational protein modification	1	1	AAEL011969,	100	32.17	inf	0.0310895	0.144634	1
GO:0018410	C-terminal protein amino acid modification	1	1	AAEL011969,	100	32.17	inf	0.0310895	0.144634	1
GO:0051596	methylglyoxal catabolic process	1	1	AAEL025906,	100	32.17	inf	0.0310895	0.144634	1
GO:0030042	actin filament depolymerization	1	1	AAEL003957,	100	32.17	inf	0.0310895	0.144634	1
GO:0046168	glycerol-3-phosphate catabolic process	1	1	AAEL001593,	100	32.17	inf	0.0310895	0.144634	1
GO:2000601	positive regulation of Arp2/3 complex-mediated actin nucleation	1	1	AAEL019465,	100	32.17	inf	0.0310895	0.144634	1
GO:0030091	protein repair	1	1	AAEL023523,	100	32.17	inf	0.0310895	0.144634	1
GO:0006089	lactate metabolic process	1	1	AAEL025906,	100	32.17	inf	0.0310895	0.144634	1
GO:0006539	glutamate catabolic process via 2-oxoglutarate	1	1	AAEL003729,	100	32.17	inf	0.0310895	0.144634	1
GO:0009438	methylglyoxal metabolic process	1	1	AAEL025906,	100	32.17	inf	0.0310895	0.144634	1
GO:0042182	ketone catabolic process	1	1	AAEL025906,	100	32.17	inf	0.0310895	0.144634	1
GO:0046486	glycerolipid metabolic process	57	5	AAEL000840,AAEL001940,AAEL008061,AAEL011353,AAEL024423,	8.8	2.82	3.03	0.0315954	0.14593	1
GO:0009123	nucleoside monophosphate metabolic process	23	3	AAEL000629,AAEL003606,AAEL005384,	13	4.2	4.71	0.0332854	0.152637	1
GO:1901564	organonitrogen compound metabolic process	1948	74	AAEL000629,AAEL001088,AAEL001205,AAEL001231,AAEL001674,AAEL001690,AAEL001830,AAEL001845,AAEL002288,AAEL002661,AAEL002978,AAEL003237,AAEL003271,AAEL003606,AAEL003729,AAEL003731,AAEL003896,AAEL003953,AAEL004988,AAEL005384,AAEL005422,AAEL005748,AAEL005774,AAEL006542,AAEL007049,AAEL007284,AAEL007544,AAEL007642,AAEL007809,AAEL007876,AAEL008061,AAEL008105,AAEL008467,AAEL008468,AAEL008609,AAEL008622,AAE…	3.8	1.22	1.29	0.0337796	0.153805	1
GO:0043412	macromolecule modification	742	32	AAEL001088,AAEL001205,AAEL001830,AAEL003237,AAEL003271,AAEL003731,AAEL003896,AAEL003953,AAEL005774,AAEL007284,AAEL007544,AAEL007642,AAEL007809,AAEL007876,AAEL008061,AAEL008622,AAEL010711,AAEL011353,AAEL011865,AAEL011969,AAEL013203,AAEL014763,AAEL018059,AAEL019566,AAEL019616,AAEL019668,AAEL020291,AAEL020987,AAEL022443,AAEL022827,AAEL024423,AAEL027209,	4.3	1.39	1.45	0.0370315	0.164657	1
GO:0009247	glycolipid biosynthetic process	24	3	AAEL008061,AAEL011353,AAEL024423,	12.5	4.02	4.48	0.0371889	0.164657	1
GO:0006505	GPI anchor metabolic process	24	3	AAEL008061,AAEL011353,AAEL024423,	12.5	4.02	4.48	0.0371889	0.164657	1
GO:0006506	GPI anchor biosynthetic process	24	3	AAEL008061,AAEL011353,AAEL024423,	12.5	4.02	4.48	0.0371889	0.164657	1
GO:1901565	organonitrogen compound catabolic process	146	9	AAEL001205,AAEL003729,AAEL005422,AAEL007049,AAEL010276,AAEL013203,AAEL013431,AAEL014426,AAEL027209,	6.2	1.98	2.08	0.0384504	0.169077	1
GO:0051276	chromosome organization	194	11	AAEL017186,AAEL018018,AAEL019404,AAEL020911,AAEL022528,AAEL022644,AAEL024313,AAEL025042,AAEL026417,AAEL027845,AAEL027993,	5.7	1.82	1.9	0.0398857	0.172238	1
GO:0009060	aerobic respiration	42	4	AAEL018662,AAEL018669,AAEL018678,AAEL018680,	9.5	3.06	3.31	0.0406646	0.172238	1
GO:1901607	alpha-amino acid biosynthetic process	25	3	AAEL008467,AAEL008468,AAEL011830,	12	3.86	4.28	0.0413157	0.172238	1
GO:0042158	lipoprotein biosynthetic process	25	3	AAEL008061,AAEL011353,AAEL024423,	12	3.86	4.28	0.0413157	0.172238	1
GO:0006664	glycolipid metabolic process	25	3	AAEL008061,AAEL011353,AAEL024423,	12	3.86	4.28	0.0413157	0.172238	1
GO:0006497	protein lipidation	25	3	AAEL008061,AAEL011353,AAEL024423,	12	3.86	4.28	0.0413157	0.172238	1
GO:0046467	membrane lipid biosynthetic process	25	3	AAEL008061,AAEL011353,AAEL024423,	12	3.86	4.28	0.0413157	0.172238	1
GO:1903509	liposaccharide metabolic process	25	3	AAEL008061,AAEL011353,AAEL024423,	12	3.86	4.28	0.0413157	0.172238	1
GO:0009127	purine nucleoside monophosphate biosynthetic process	11	2	AAEL003606,AAEL005384,	18.2	5.85	6.96	0.0440374	0.1824	1
GO:0032392	DNA geometric change	26	3	AAEL017186,AAEL019404,AAEL025042,	11.5	3.71	4.09	0.0456629	0.184375	1
GO:0042157	lipoprotein metabolic process	26	3	AAEL008061,AAEL011353,AAEL024423,	11.5	3.71	4.09	0.0456629	0.184375	1
GO:0008652	cellular amino acid biosynthetic process	26	3	AAEL008467,AAEL008468,AAEL011830,	11.5	3.71	4.09	0.0456629	0.184375	1
GO:0032508	DNA duplex unwinding	26	3	AAEL017186,AAEL019404,AAEL025042,	11.5	3.71	4.09	0.0456629	0.184375	1
GO:0006259	DNA metabolic process	200	11	AAEL000147,AAEL002581,AAEL003271,AAEL005539,AAEL007692,AAEL007939,AAEL008247,AAEL011254,AAEL017186,AAEL019404,AAEL025042,	5.5	1.77	1.84	0.0478825	0.192128	1

## Sheet: 12hp_MF
ID	Name	Bgd count	Result count	Result gene list	Pct of bgd	Fold enrichment	Odds ratio	P-value	Benjamini	Bonferroni
GO:0003824	catalytic activity	3624	182	AAEL000006,AAEL000025,AAEL000223,AAEL000629,AAEL000687,AAEL000735,AAEL000840,AAEL000854,AAEL000918,AAEL001088,AAEL001205,AAEL001231,AAEL001593,AAEL001607,AAEL001616,AAEL001627,AAEL001674,AAEL001690,AAEL001830,AAEL001845,AAEL001878,AAEL001940,AAEL002288,AAEL002296,AAEL002581,AAEL002661,AAEL002680,AAEL002978,AAEL003098,AAEL003188,AAEL003203,AAEL003237,AAEL003271,AAEL003497,AAEL003606,AAEL003709,AAE…	5	1.62	2.37	4.14044e-15	1.66032e-12	1.66032e-12
GO:0016740	transferase activity	1048	54	AAEL000629,AAEL000687,AAEL001088,AAEL001205,AAEL001607,AAEL001627,AAEL001830,AAEL001940,AAEL002296,AAEL003098,AAEL003271,AAEL003497,AAEL003731,AAEL003896,AAEL003953,AAEL004988,AAEL005774,AAEL007284,AAEL007544,AAEL007642,AAEL007692,AAEL007809,AAEL007876,AAEL007951,AAEL008061,AAEL008247,AAEL008622,AAEL009017,AAEL009938,AAEL010276,AAEL010417,AAEL010711,AAEL011898,AAEL011957,AAEL011969,AAEL013260,AAE…	5.2	1.66	1.82	0.000133192	0.0266453	0.0534102
GO:0016772	transferase activity, transferring phosphorus-containing groups	440	28	AAEL000629,AAEL001607,AAEL001627,AAEL001940,AAEL003731,AAEL003896,AAEL003953,AAEL004988,AAEL007284,AAEL007544,AAEL007642,AAEL007692,AAEL007876,AAEL008061,AAEL008247,AAEL008622,AAEL010417,AAEL010711,AAEL018059,AAEL019404,AAEL019566,AAEL019577,AAEL019616,AAEL019668,AAEL020132,AAEL020291,AAEL022443,AAEL027354,	6.4	2.05	2.22	0.000257301	0.0266453	0.103178
GO:0005319	lipid transporter activity	31	6	AAEL009955,AAEL018103,AAEL023558,AAEL023632,AAEL026175,AAEL026962,	19.4	6.23	7.59	0.000329502	0.0266453	0.13213
GO:0016829	lyase activity	104	11	AAEL000006,AAEL000025,AAEL003188,AAEL004884,AAEL005229,AAEL008467,AAEL008468,AAEL009298,AAEL011830,AAEL014238,AAEL021106,	10.6	3.4	3.77	0.000376489	0.0266453	0.150972
GO:0016491	oxidoreductase activity	669	37	AAEL000735,AAEL001593,AAEL001845,AAEL002581,AAEL003203,AAEL003729,AAEL004126,AAEL004127,AAEL004941,AAEL005422,AAEL005732,AAEL006044,AAEL006733,AAEL007023,AAEL007523,AAEL007526,AAEL007830,AAEL008099,AAEL008574,AAEL009128,AAEL012014,AAEL013225,AAEL013389,AAEL013407,AAEL013431,AAEL013980,AAEL014426,AAEL014840,AAEL014890,AAEL018662,AAEL018664,AAEL018669,AAEL018678,AAEL018680,AAEL023523,AAEL026142,AAE…	5.5	1.78	1.92	0.000450746	0.0266453	0.180749
GO:0016634	oxidoreductase activity, acting on the CH-CH group of donors, oxygen as acceptor	6	3	AAEL000735,AAEL008574,AAEL013389,	50	16.08	31.43	0.000555612	0.0266453	0.2228
GO:0019842	vitamin binding	61	8	AAEL003188,AAEL008099,AAEL010610,AAEL014238,AAEL014272,AAEL021106,AAEL026380,AAEL028144,	13.1	4.22	4.79	0.000562522	0.0266453	0.225571
GO:0016831	carboxy-lyase activity	23	5	AAEL000006,AAEL000025,AAEL003188,AAEL014238,AAEL021106,	21.7	6.99	8.77	0.000598024	0.0266453	0.239808
GO:0033743	peptide-methionine (R)-S-oxide reductase activity	2	2	AAEL002581,AAEL023523,	100	32.17	inf	0.000963841	0.0351364	0.3865
GO:0004122	cystathionine beta-synthase activity	2	2	AAEL008467,AAEL008468,	100	32.17	inf	0.000963841	0.0351364	0.3865
GO:0016830	carbon-carbon lyase activity	27	5	AAEL000006,AAEL000025,AAEL003188,AAEL014238,AAEL021106,	18.5	5.96	7.17	0.00129558	0.0362955	0.519526
GO:0016627	oxidoreductase activity, acting on the CH-CH group of donors	40	6	AAEL000735,AAEL004127,AAEL005732,AAEL008574,AAEL013389,AAEL026142,	15	4.82	5.58	0.00135769	0.0362955	0.544432
GO:0030170	pyridoxal phosphate binding	40	6	AAEL003188,AAEL010610,AAEL014238,AAEL014272,AAEL021106,AAEL028144,	15	4.82	5.58	0.00135769	0.0362955	0.544432
GO:0070279	vitamin B6 binding	40	6	AAEL003188,AAEL010610,AAEL014238,AAEL014272,AAEL021106,AAEL028144,	15	4.82	5.58	0.00135769	0.0362955	0.544432
GO:0004611	phosphoenolpyruvate carboxykinase activity	3	2	AAEL000006,AAEL000025,	66.7	21.44	62.69	0.00283193	0.0597686	1
GO:0004613	phosphoenolpyruvate carboxykinase (GTP) activity	3	2	AAEL000006,AAEL000025,	66.7	21.44	62.69	0.00283193	0.0597686	1
GO:0070569	uridylyltransferase activity	3	2	AAEL001607,AAEL001627,	66.7	21.44	62.69	0.00283193	0.0597686	1
GO:0004726	non-membrane spanning protein tyrosine phosphatase activity	3	2	AAEL003237,AAEL020987,	66.7	21.44	62.69	0.00283193	0.0597686	1
GO:0016645	oxidoreductase activity, acting on the CH-NH group of donors	11	3	AAEL005422,AAEL007526,AAEL013431,	27.3	8.77	11.78	0.00408152	0.0818346	1
GO:0140096	catalytic activity, acting on a protein	1164	52	AAEL001205,AAEL001231,AAEL001674,AAEL001690,AAEL001830,AAEL002288,AAEL002661,AAEL002978,AAEL003237,AAEL003271,AAEL003731,AAEL003896,AAEL003953,AAEL005748,AAEL005774,AAEL006542,AAEL007049,AAEL007284,AAEL007544,AAEL007642,AAEL007876,AAEL008609,AAEL008622,AAEL008893,AAEL010711,AAEL010867,AAEL011292,AAEL011662,AAEL011929,AAEL011969,AAEL013857,AAEL013980,AAEL014148,AAEL014348,AAEL014763,AAEL017451,AAE…	4.5	1.44	1.54	0.00447985	0.0855439	1
GO:0009055	electron transfer activity	68	7	AAEL007526,AAEL013980,AAEL018662,AAEL018664,AAEL018669,AAEL018678,AAEL018680,	10.3	3.31	3.63	0.00503158	0.0855584	1
GO:0008238	exopeptidase activity	86	8	AAEL002978,AAEL006542,AAEL008609,AAEL008893,AAEL011292,AAEL011662,AAEL017451,AAEL018249,	9.3	2.99	3.25	0.00518702	0.0855584	1
GO:0003997	acyl-CoA oxidase activity	4	2	AAEL000735,AAEL008574,	50	16.08	31.34	0.00554743	0.0855584	1
GO:0016881	acid-amino acid ligase activity	4	2	AAEL003606,AAEL008105,	50	16.08	31.34	0.00554743	0.0855584	1
GO:0008410	CoA-transferase activity	4	2	AAEL013260,AAEL015557,	50	16.08	31.34	0.00554743	0.0855584	1
GO:0004553	hydrolase activity, hydrolyzing O-glycosyl compounds	88	8	AAEL000223,AAEL004931,AAEL005188,AAEL005749,AAEL005763,AAEL015020,AAEL015573,AAEL021375,	9.1	2.92	3.17	0.00595745	0.0872808	1
GO:0015453	oxidoreduction-driven active transmembrane transporter activity	38	5	AAEL018662,AAEL018664,AAEL018669,AAEL018678,AAEL018680,	13.2	4.23	4.78	0.00609442	0.0872808	1
GO:0016675	oxidoreductase activity, acting on a heme group of donors	14	3	AAEL018662,AAEL018664,AAEL018669,	21.4	6.89	8.57	0.00840215	0.112309	1
GO:0004129	cytochrome-c oxidase activity	14	3	AAEL018662,AAEL018664,AAEL018669,	21.4	6.89	8.57	0.00840215	0.112309	1
GO:0016671	oxidoreductase activity, acting on a sulfur group of donors, disulfide as acceptor	5	2	AAEL002581,AAEL023523,	40	12.87	20.89	0.00905614	0.116443	1
GO:0004672	protein kinase activity	244	15	AAEL003731,AAEL003896,AAEL003953,AAEL007284,AAEL007544,AAEL007642,AAEL007876,AAEL008622,AAEL010711,AAEL018059,AAEL019566,AAEL019616,AAEL019668,AAEL020291,AAEL022443,	6.1	1.98	2.09	0.00929221	0.116443	1
GO:0042578	phosphoric ester hydrolase activity	138	10	AAEL003237,AAEL006987,AAEL010678,AAEL014763,AAEL014842,AAEL020987,AAEL021006,AAEL022827,AAEL029070,AAEL029071,	7.2	2.33	2.48	0.0108809	0.132219	1
GO:0016798	hydrolase activity, acting on glycosyl bonds	99	8	AAEL000223,AAEL004931,AAEL005188,AAEL005749,AAEL005763,AAEL015020,AAEL015573,AAEL021375,	8.1	2.6	2.78	0.0118468	0.136999	1
GO:0016301	kinase activity	353	19	AAEL000629,AAEL003731,AAEL003896,AAEL003953,AAEL004988,AAEL007284,AAEL007544,AAEL007642,AAEL007876,AAEL008622,AAEL010711,AAEL018059,AAEL019404,AAEL019566,AAEL019577,AAEL019616,AAEL019668,AAEL020291,AAEL022443,	5.4	1.73	1.82	0.0142962	0.136999	1
GO:0016836	hydro-lyase activity	31	4	AAEL005229,AAEL008467,AAEL008468,AAEL011830,	12.9	4.15	4.66	0.0148907	0.136999	1
GO:0003993	acid phosphatase activity	7	2	AAEL003237,AAEL020987,	28.6	9.19	12.53	0.018249	0.136999	1
GO:0016791	phosphatase activity	108	8	AAEL003237,AAEL006987,AAEL014763,AAEL014842,AAEL020987,AAEL022827,AAEL029070,AAEL029071,	7.4	2.38	2.53	0.0192011	0.136999	1
GO:0015399	primary active transmembrane transporter activity	88	7	AAEL015644,AAEL018662,AAEL018664,AAEL018669,AAEL018678,AAEL018680,AAEL020303,	8	2.56	2.73	0.0195199	0.136999	1
GO:0016835	carbon-oxygen lyase activity	34	4	AAEL005229,AAEL008467,AAEL008468,AAEL011830,	11.8	3.78	4.19	0.0204133	0.136999	1
GO:0016773	phosphotransferase activity, alcohol group as acceptor	295	16	AAEL003731,AAEL003896,AAEL003953,AAEL007284,AAEL007544,AAEL007642,AAEL007876,AAEL008622,AAEL010711,AAEL018059,AAEL019566,AAEL019616,AAEL019668,AAEL020291,AAEL022443,AAEL027354,	5.4	1.74	1.83	0.022001	0.136999	1
GO:0016616	oxidoreductase activity, acting on the CH-OH group of donors, NAD or NADP as acceptor	35	4	AAEL001593,AAEL001845,AAEL012014,AAEL029007,	11.4	3.68	4.06	0.0224986	0.136999	1
GO:0016667	oxidoreductase activity, acting on a sulfur group of donors	21	3	AAEL002581,AAEL013980,AAEL023523,	14.3	4.6	5.23	0.0261579	0.136999	1
GO:0036094	small molecule binding	1176	48	AAEL000006,AAEL000025,AAEL000629,AAEL000735,AAEL001593,AAEL001616,AAEL003188,AAEL003281,AAEL003731,AAEL003896,AAEL003953,AAEL004127,AAEL004988,AAEL005732,AAEL007209,AAEL007284,AAEL007544,AAEL007642,AAEL007876,AAEL008099,AAEL008247,AAEL008574,AAEL008622,AAEL009214,AAEL010360,AAEL010610,AAEL010711,AAEL011500,AAEL011653,AAEL013049,AAEL014238,AAEL014272,AAEL015644,AAEL017186,AAEL018059,AAEL019566,AAE…	4.1	1.31	1.38	0.029312	0.136999	1
GO:0004177	aminopeptidase activity	38	4	AAEL002978,AAEL008893,AAEL011292,AAEL018249,	10.5	3.39	3.7	0.0295111	0.136999	1
GO:0004035	alkaline phosphatase activity	9	2	AAEL029070,AAEL029071,	22.2	7.15	8.95	0.0300257	0.136999	1
GO:0016787	hydrolase activity	1527	60	AAEL000223,AAEL000840,AAEL000918,AAEL001231,AAEL001616,AAEL001674,AAEL001690,AAEL001878,AAEL002288,AAEL002661,AAEL002978,AAEL003237,AAEL004931,AAEL005188,AAEL005706,AAEL005748,AAEL005749,AAEL005763,AAEL006542,AAEL006987,AAEL007049,AAEL008532,AAEL008609,AAEL008857,AAEL008893,AAEL010678,AAEL010867,AAEL011254,AAEL011292,AAEL011500,AAEL011662,AAEL011929,AAEL013049,AAEL013857,AAEL014148,AAEL014287,AAE…	3.9	1.26	1.33	0.0309199	0.136999	1
GO:0008237	metallopeptidase activity	163	10	AAEL001231,AAEL002661,AAEL002978,AAEL008609,AAEL011292,AAEL011662,AAEL017451,AAEL018249,AAEL019828,AAEL019829,	6.1	1.97	2.07	0.030935	0.136999	1
GO:0004047	aminomethyltransferase activity	1	1	AAEL010276,	100	32.17	inf	0.0310895	0.136999	1
GO:0046899	nucleoside triphosphate adenylate kinase activity	1	1	AAEL000629,	100	32.17	inf	0.0310895	0.136999	1
GO:0004671	protein C-terminal S-isoprenylcysteine carboxyl O-methyltransferase activity	1	1	AAEL011969,	100	32.17	inf	0.0310895	0.136999	1
GO:0047710	bis(5'-adenosyl)-triphosphatase activity	1	1	AAEL013049,	100	32.17	inf	0.0310895	0.136999	1
GO:0004639	phosphoribosylaminoimidazolesuccinocarboxamide synthase activity	1	1	AAEL003606,	100	32.17	inf	0.0310895	0.136999	1
GO:0016649	oxidoreductase activity, acting on the CH-NH group of donors, quinone or similar compound as acceptor	1	1	AAEL007526,	100	32.17	inf	0.0310895	0.136999	1
GO:0015002	obsolete heme-copper terminal oxidase activity	1	1	AAEL018669,	100	32.17	inf	0.0310895	0.136999	1
GO:0004096	catalase activity	1	1	AAEL013407,	100	32.17	inf	0.0310895	0.136999	1
GO:0005246	calcium channel regulator activity	1	1	AAEL023159,	100	32.17	inf	0.0310895	0.136999	1
GO:0005003	ephrin receptor activity	1	1	AAEL010711,	100	32.17	inf	0.0310895	0.136999	1
GO:0046570	methylthioribulose 1-phosphate dehydratase activity	1	1	AAEL011830,	100	32.17	inf	0.0310895	0.136999	1
GO:0004174	electron-transferring-flavoprotein dehydrogenase activity	1	1	AAEL007526,	100	32.17	inf	0.0310895	0.136999	1
GO:0004109	coproporphyrinogen oxidase activity	1	1	AAEL013389,	100	32.17	inf	0.0310895	0.136999	1
GO:0004657	proline dehydrogenase activity	1	1	AAEL013431,	100	32.17	inf	0.0310895	0.136999	1
GO:0140359	ABC-type transporter activity	1	1	AAEL015644,	100	32.17	inf	0.0310895	0.136999	1
GO:0003880	protein C-terminal carboxyl O-methyltransferase activity	1	1	AAEL011969,	100	32.17	inf	0.0310895	0.136999	1
GO:0008559	ABC-type xenobiotic transporter activity	1	1	AAEL015644,	100	32.17	inf	0.0310895	0.136999	1
GO:0004132	dCMP deaminase activity	1	1	AAEL014287,	100	32.17	inf	0.0310895	0.136999	1
GO:0005178	integrin binding	1	1	AAEL002819,	100	32.17	inf	0.0310895	0.136999	1
GO:0004457	lactate dehydrogenase activity	1	1	AAEL012014,	100	32.17	inf	0.0310895	0.136999	1
GO:0106073	dolichyl pyrophosphate Glc2Man9GlcNAc2 alpha-1,2-glucosyltransferase activity	1	1	AAEL007809,	100	32.17	inf	0.0310895	0.136999	1
GO:0004618	phosphoglycerate kinase activity	1	1	AAEL004988,	100	32.17	inf	0.0310895	0.136999	1
GO:0004642	phosphoribosylformylglycinamidine synthase activity	1	1	AAEL005384,	100	32.17	inf	0.0310895	0.136999	1
GO:0016642	oxidoreductase activity, acting on the CH-NH2 group of donors, disulfide as acceptor	1	1	AAEL014426,	100	32.17	inf	0.0310895	0.136999	1
GO:0004459	L-lactate dehydrogenase activity	1	1	AAEL012014,	100	32.17	inf	0.0310895	0.136999	1
GO:0005457	GDP-fucose transmembrane transporter activity	1	1	AAEL007481,	100	32.17	inf	0.0310895	0.136999	1
GO:0004357	glutamate-cysteine ligase activity	1	1	AAEL008105,	100	32.17	inf	0.0310895	0.136999	1
GO:0004375	glycine dehydrogenase (decarboxylating) activity	1	1	AAEL014426,	100	32.17	inf	0.0310895	0.136999	1
GO:0003842	1-pyrroline-5-carboxylate dehydrogenase activity	1	1	AAEL005422,	100	32.17	inf	0.0310895	0.136999	1
GO:0008108	UDP-glucose:hexose-1-phosphate uridylyltransferase activity	1	1	AAEL001607,	100	32.17	inf	0.0310895	0.136999	1
GO:0004416	hydroxyacylglutathione hydrolase activity	1	1	AAEL025906,	100	32.17	inf	0.0310895	0.136999	1
GO:0036080	purine nucleotide-sugar transmembrane transporter activity	1	1	AAEL007481,	100	32.17	inf	0.0310895	0.136999	1
GO:0015039	NADPH-adrenodoxin reductase activity	1	1	AAEL006733,	100	32.17	inf	0.0310895	0.136999	1
GO:0016730	oxidoreductase activity, acting on iron-sulfur proteins as donors	1	1	AAEL006733,	100	32.17	inf	0.0310895	0.136999	1
GO:0004128	cytochrome-b5 reductase activity, acting on NAD(P)H	1	1	AAEL013225,	100	32.17	inf	0.0310895	0.136999	1
GO:0016731	oxidoreductase activity, acting on iron-sulfur proteins as donors, NAD or NADP as acceptor	1	1	AAEL006733,	100	32.17	inf	0.0310895	0.136999	1
GO:0004757	sepiapterin reductase activity	1	1	AAEL001845,	100	32.17	inf	0.0310895	0.136999	1
GO:0003989	acetyl-CoA carboxylase activity	1	1	AAEL026069,	100	32.17	inf	0.0310895	0.136999	1
GO:0004367	glycerol-3-phosphate dehydrogenase [NAD+] activity	1	1	AAEL001593,	100	32.17	inf	0.0310895	0.136999	1
GO:0016421	CoA carboxylase activity	1	1	AAEL026069,	100	32.17	inf	0.0310895	0.136999	1
GO:0047988	hydroxyacid-oxoacid transhydrogenase activity	1	1	AAEL003729,	100	32.17	inf	0.0310895	0.136999	1
GO:0004583	dolichyl-phosphate-glucose-glycolipid alpha-glucosyltransferase activity	1	1	AAEL007809,	100	32.17	inf	0.0310895	0.136999	1
GO:0047952	glycerol-3-phosphate dehydrogenase [NAD(P)+] activity	1	1	AAEL001593,	100	32.17	inf	0.0310895	0.136999	1
GO:0016879	ligase activity, forming carbon-nitrogen bonds	23	3	AAEL003606,AAEL005384,AAEL008105,	13	4.2	4.71	0.0332854	0.143521	1
GO:0051539	4 iron, 4 sulfur cluster binding	23	3	AAEL007526,AAEL008247,AAEL010360,	13	4.2	4.71	0.0332854	0.143521	1
GO:0003995	acyl-CoA dehydrogenase activity	10	2	AAEL004127,AAEL005732,	20	6.43	7.83	0.0367727	0.148948	1
GO:0015923	mannosidase activity	10	2	AAEL005749,AAEL005763,	20	6.43	7.83	0.0367727	0.148948	1
GO:0004559	alpha-mannosidase activity	10	2	AAEL005749,AAEL005763,	20	6.43	7.83	0.0367727	0.148948	1
GO:0019706	protein-cysteine S-palmitoyltransferase activity	10	2	AAEL019539,AAEL027910,	20	6.43	7.83	0.0367727	0.148948	1
GO:0005548	phospholipid transporter activity	10	2	AAEL023558,AAEL023632,	20	6.43	7.83	0.0367727	0.148948	1
GO:0019707	protein-cysteine S-acyltransferase activity	10	2	AAEL019539,AAEL027910,	20	6.43	7.83	0.0367727	0.148948	1
GO:0043168	anion binding	1083	44	AAEL000006,AAEL000025,AAEL000629,AAEL000735,AAEL001616,AAEL003188,AAEL003281,AAEL003731,AAEL003896,AAEL003953,AAEL004127,AAEL004988,AAEL005732,AAEL007209,AAEL007284,AAEL007544,AAEL007642,AAEL007876,AAEL008099,AAEL008574,AAEL008622,AAEL010360,AAEL010610,AAEL010711,AAEL011500,AAEL011653,AAEL014238,AAEL014272,AAEL015644,AAEL017186,AAEL018059,AAEL019566,AAEL019616,AAEL019668,AAEL020291,AAEL020303,AAE…	4.1	1.31	1.37	0.0387067	0.155214	1
GO:0016614	oxidoreductase activity, acting on CH-OH group of donors	62	5	AAEL001593,AAEL001845,AAEL003729,AAEL012014,AAEL029007,	8.1	2.59	2.76	0.0431445	0.169798	1
GO:0003887	DNA-directed DNA polymerase activity	11	2	AAEL007692,AAEL008247,	18.2	5.85	6.96	0.0440374	0.169798	1
GO:0016409	palmitoyltransferase activity	11	2	AAEL019539,AAEL027910,	18.2	5.85	6.96	0.0440374	0.169798	1
GO:0016780	phosphotransferase activity, for other substituted phosphate groups	11	2	AAEL008061,AAEL020132,	18.2	5.85	6.96	0.0440374	0.169798	1
GO:0140097	catalytic activity, acting on DNA	84	6	AAEL007692,AAEL008247,AAEL011254,AAEL017186,AAEL019404,AAEL025042,	7.1	2.3	2.42	0.0464344	0.177335	1

## Sheet: 18-24hp_BP
ID	Name	Bgd count	Result count	Result gene list	Pct of bgd	Fold enrichment	Odds ratio	P-value	Benjamini	Bonferroni
GO:0030036	actin cytoskeleton organization	37	13	AAEL001904,AAEL002714,AAEL003855,AAEL004475,AAEL007546,AAEL008303,AAEL009059,AAEL009371,AAEL013461,AAEL013661,AAEL019619,AAEL021429,AAEL027716,	35.1	4.56	6.57	1.92067e-06	0.00145943	0.00206472
GO:0030029	actin filament-based process	38	13	AAEL001904,AAEL002714,AAEL003855,AAEL004475,AAEL007546,AAEL008303,AAEL009059,AAEL009371,AAEL013461,AAEL013661,AAEL019619,AAEL021429,AAEL027716,	34.2	4.44	6.31	2.71522e-06	0.00145943	0.00291886
GO:0045010	actin nucleation	12	7	AAEL001904,AAEL004475,AAEL007546,AAEL009059,AAEL009371,AAEL021429,AAEL027716,	58.3	7.57	16.9	8.83355e-06	0.00316536	0.00949607
GO:0110053	regulation of actin filament organization	14	7	AAEL001904,AAEL004475,AAEL005419,AAEL007546,AAEL009059,AAEL013768,AAEL027716,	50	6.49	12.07	3.33566e-05	0.00662574	0.0358583
GO:1902903	regulation of supramolecular fiber organization	15	7	AAEL001904,AAEL004475,AAEL005419,AAEL007546,AAEL009059,AAEL013768,AAEL027716,	46.7	6.06	10.56	5.83912e-05	0.00662574	0.0627706
GO:0030832	regulation of actin filament length	11	6	AAEL001904,AAEL004475,AAEL005419,AAEL007546,AAEL009059,AAEL027716,	54.5	7.08	14.47	6.77983e-05	0.00662574	0.0728832
GO:0032271	regulation of protein polymerization	11	6	AAEL001904,AAEL004475,AAEL005419,AAEL007546,AAEL009059,AAEL027716,	54.5	7.08	14.47	6.77983e-05	0.00662574	0.0728832
GO:0008064	regulation of actin polymerization or depolymerization	11	6	AAEL001904,AAEL004475,AAEL005419,AAEL007546,AAEL009059,AAEL027716,	54.5	7.08	14.47	6.77983e-05	0.00662574	0.0728832
GO:0030833	regulation of actin filament polymerization	11	6	AAEL001904,AAEL004475,AAEL005419,AAEL007546,AAEL009059,AAEL027716,	54.5	7.08	14.47	6.77983e-05	0.00662574	0.0728832
GO:0032535	regulation of cellular component size	11	6	AAEL001904,AAEL004475,AAEL005419,AAEL007546,AAEL009059,AAEL027716,	54.5	7.08	14.47	6.77983e-05	0.00662574	0.0728832
GO:0090066	regulation of anatomical structure size	11	6	AAEL001904,AAEL004475,AAEL005419,AAEL007546,AAEL009059,AAEL027716,	54.5	7.08	14.47	6.77983e-05	0.00662574	0.0728832
GO:0016197	endosomal transport	16	7	AAEL005655,AAEL010860,AAEL010945,AAEL011134,AAEL011556,AAEL013252,AAEL014771,	43.8	5.68	9.39	9.69229e-05	0.00707893	0.104192
GO:0032970	regulation of actin filament-based process	16	7	AAEL001904,AAEL004475,AAEL005419,AAEL007546,AAEL009059,AAEL013768,AAEL027716,	43.8	5.68	9.39	9.69229e-05	0.00707893	0.104192
GO:0032956	regulation of actin cytoskeleton organization	16	7	AAEL001904,AAEL004475,AAEL005419,AAEL007546,AAEL009059,AAEL013768,AAEL027716,	43.8	5.68	9.39	9.69229e-05	0.00707893	0.104192
GO:0007015	actin filament organization	21	8	AAEL001904,AAEL004475,AAEL007546,AAEL009059,AAEL009371,AAEL013661,AAEL021429,AAEL027716,	38.1	4.94	7.43	9.87757e-05	0.00707893	0.106184
GO:0043254	regulation of protein-containing complex assembly	12	6	AAEL001904,AAEL004475,AAEL005419,AAEL007546,AAEL009059,AAEL027716,	50	6.49	12.06	0.000126763	0.0080159	0.13627
GO:0007034	vacuolar transport	12	6	AAEL000985,AAEL001336,AAEL001698,AAEL009147,AAEL010371,AAEL012313,	50	6.49	12.06	0.000126763	0.0080159	0.13627
GO:0051641	cellular localization	246	36	AAEL000985,AAEL001144,AAEL001336,AAEL001543,AAEL001582,AAEL001698,AAEL002240,AAEL002714,AAEL003837,AAEL004168,AAEL004211,AAEL004237,AAEL005276,AAEL005339,AAEL005655,AAEL007282,AAEL009147,AAEL009169,AAEL009183,AAEL009956,AAEL010368,AAEL010371,AAEL010559,AAEL010860,AAEL010945,AAEL011134,AAEL011239,AAEL011556,AAEL012064,AAEL012313,AAEL012960,AAEL013252,AAEL013803,AAEL014771,AAEL026174,AAEL027393,	14.6	1.9	2.1	0.000135527	0.00806451	0.145691
GO:0006869	lipid transport	60	14	AAEL002163,AAEL004141,AAEL004211,AAEL004981,AAEL009169,AAEL009956,AAEL010434,AAEL011953,AAEL012064,AAEL016972,AAEL018354,AAEL019580,AAEL019883,AAEL026174,	23.3	3.03	3.69	0.000142536	0.00806451	0.153226
GO:0010876	lipid localization	62	14	AAEL002163,AAEL004141,AAEL004211,AAEL004981,AAEL009169,AAEL009956,AAEL010434,AAEL011953,AAEL012064,AAEL016972,AAEL018354,AAEL019580,AAEL019883,AAEL026174,	22.6	2.93	3.54	0.000206794	0.0111152	0.222303
GO:0007010	cytoskeleton organization	93	18	AAEL001904,AAEL002714,AAEL003855,AAEL004475,AAEL005791,AAEL007546,AAEL007810,AAEL008303,AAEL008863,AAEL009059,AAEL009371,AAEL013074,AAEL013461,AAEL013661,AAEL019619,AAEL019939,AAEL021429,AAEL027716,	19.4	2.51	2.92	0.000223394	0.0114357	0.240149
GO:0034314	Arp2/3 complex-mediated actin nucleation	9	5	AAEL001904,AAEL004475,AAEL007546,AAEL009059,AAEL027716,	55.6	7.21	15.06	0.000260121	0.0127105	0.27963
GO:0072384	organelle transport along microtubule	3	3	AAEL001582,AAEL002714,AAEL027393,	100	12.98	inf	0.000455904	0.0184257	0.490097
GO:0047496	vesicle transport along microtubule	3	3	AAEL001582,AAEL002714,AAEL027393,	100	12.98	inf	0.000455904	0.0184257	0.490097
GO:0099518	vesicle cytoskeletal trafficking	3	3	AAEL001582,AAEL002714,AAEL027393,	100	12.98	inf	0.000455904	0.0184257	0.490097
GO:0070848	response to growth factor	6	4	AAEL006792,AAEL008696,AAEL019466,AAEL024053,	66.7	8.65	24.07	0.000462784	0.0184257	0.497493
GO:0071363	cellular response to growth factor stimulus	6	4	AAEL006792,AAEL008696,AAEL019466,AAEL024053,	66.7	8.65	24.07	0.000462784	0.0184257	0.497493
GO:0007167	enzyme linked receptor protein signaling pathway	20	7	AAEL004319,AAEL006792,AAEL008696,AAEL010374,AAEL019466,AAEL024053,AAEL027566,	35	4.54	6.5	0.000499564	0.0191797	0.537032
GO:0071702	organic substance transport	275	37	AAEL001144,AAEL001385,AAEL001543,AAEL002163,AAEL002240,AAEL003416,AAEL003758,AAEL004141,AAEL004168,AAEL004211,AAEL004237,AAEL004981,AAEL005276,AAEL005339,AAEL005655,AAEL006432,AAEL006862,AAEL009147,AAEL009169,AAEL009956,AAEL010368,AAEL010434,AAEL010559,AAEL010731,AAEL010945,AAEL011134,AAEL011953,AAEL012064,AAEL012960,AAEL016972,AAEL018354,AAEL019488,AAEL019580,AAEL019883,AAEL021314,AAEL022990,AAE…	13.5	1.75	1.9	0.000595715	0.021891	0.640393
GO:0046907	intracellular transport	208	30	AAEL000985,AAEL001144,AAEL001336,AAEL001543,AAEL001582,AAEL001698,AAEL002240,AAEL002714,AAEL004168,AAEL004237,AAEL005276,AAEL005339,AAEL005655,AAEL009147,AAEL009956,AAEL010368,AAEL010371,AAEL010559,AAEL010860,AAEL010945,AAEL011134,AAEL011239,AAEL011556,AAEL012064,AAEL012313,AAEL012960,AAEL013252,AAEL014771,AAEL026174,AAEL027393,	14.4	1.87	2.06	0.000610912	0.021891	0.656731
GO:0097435	supramolecular fiber organization	27	8	AAEL001904,AAEL004475,AAEL007546,AAEL009059,AAEL009371,AAEL013661,AAEL021429,AAEL027716,	29.6	3.85	5.08	0.000711136	0.0246604	0.764471
GO:0051649	establishment of localization in cell	220	31	AAEL000985,AAEL001144,AAEL001336,AAEL001543,AAEL001582,AAEL001698,AAEL002240,AAEL002714,AAEL003837,AAEL004168,AAEL004237,AAEL005276,AAEL005339,AAEL005655,AAEL009147,AAEL009956,AAEL010368,AAEL010371,AAEL010559,AAEL010860,AAEL010945,AAEL011134,AAEL011239,AAEL011556,AAEL012064,AAEL012313,AAEL012960,AAEL013252,AAEL014771,AAEL026174,AAEL027393,	14.1	1.83	2	0.000745545	0.0250457	0.801461
GO:0051640	organelle localization	22	7	AAEL001582,AAEL002714,AAEL004211,AAEL007282,AAEL009169,AAEL013803,AAEL027393,	31.8	4.13	5.63	0.000959031	0.0303223	1
GO:0051493	regulation of cytoskeleton organization	22	7	AAEL001904,AAEL004475,AAEL005419,AAEL007546,AAEL009059,AAEL013768,AAEL027716,	31.8	4.13	5.63	0.000959031	0.0303223	1
GO:0033036	macromolecule localization	264	35	AAEL001144,AAEL001385,AAEL001543,AAEL002163,AAEL002240,AAEL003416,AAEL003758,AAEL004141,AAEL004168,AAEL004211,AAEL004237,AAEL004981,AAEL005276,AAEL005339,AAEL005655,AAEL009147,AAEL009169,AAEL009183,AAEL009956,AAEL010368,AAEL010434,AAEL010559,AAEL010731,AAEL010945,AAEL011134,AAEL011953,AAEL012064,AAEL012960,AAEL016972,AAEL018354,AAEL019488,AAEL019580,AAEL019883,AAEL022990,AAEL026174,	13.3	1.72	1.87	0.00108022	0.0331782	1
GO:0070887	cellular response to chemical stimulus	73	14	AAEL002309,AAEL003599,AAEL006271,AAEL006792,AAEL007397,AAEL008696,AAEL009588,AAEL010377,AAEL012069,AAEL012471,AAEL013171,AAEL019466,AAEL019507,AAEL024053,	19.2	2.49	2.87	0.00119039	0.0355463	1
GO:0016482	cytosolic transport	12	5	AAEL005655,AAEL010860,AAEL011134,AAEL013252,AAEL014771,	41.7	5.41	8.6	0.00134403	0.0390496	1
GO:0071559	response to transforming growth factor beta	4	3	AAEL008696,AAEL019466,AAEL024053,	75	9.73	36.06	0.00171858	0.0450603	1
GO:0007179	transforming growth factor beta receptor signaling pathway	4	3	AAEL008696,AAEL019466,AAEL024053,	75	9.73	36.06	0.00171858	0.0450603	1
GO:0071560	cellular response to transforming growth factor beta stimulus	4	3	AAEL008696,AAEL019466,AAEL024053,	75	9.73	36.06	0.00171858	0.0450603	1
GO:0072529	pyrimidine-containing compound catabolic process	4	3	AAEL001925,AAEL006518,AAEL025432,	75	9.73	36.06	0.00171858	0.0450603	1
GO:0016310	phosphorylation	350	42	AAEL000194,AAEL000275,AAEL000343,AAEL002781,AAEL002895,AAEL003013,AAEL003245,AAEL004319,AAEL004351,AAEL004853,AAEL006317,AAEL006834,AAEL007375,AAEL008078,AAEL008306,AAEL008585,AAEL008621,AAEL009294,AAEL009880,AAEL009991,AAEL010206,AAEL010374,AAEL011274,AAEL011594,AAEL012553,AAEL014958,AAEL017338,AAEL019473,AAEL019511,AAEL019631,AAEL019731,AAEL019734,AAEL019843,AAEL020848,AAEL021353,AAEL024053,AAE…	12	1.56	1.67	0.00262437	0.0671715	1
GO:0005975	carbohydrate metabolic process	191	26	AAEL000651,AAEL001396,AAEL001480,AAEL002781,AAEL003066,AAEL004575,AAEL004580,AAEL004582,AAEL004661,AAEL004853,AAEL005460,AAEL006151,AAEL006317,AAEL007088,AAEL007673,AAEL008452,AAEL009176,AAEL010206,AAEL010536,AAEL010590,AAEL010653,AAEL010963,AAEL013877,AAEL014541,AAEL014958,AAEL022879,	13.6	1.77	1.92	0.00313241	0.076917	1
GO:0046835	carbohydrate phosphorylation	9	4	AAEL002781,AAEL006317,AAEL010206,AAEL014958,	44.4	5.77	9.62	0.00321978	0.076917	1
GO:0042147	retrograde transport, endosome to Golgi	9	4	AAEL005655,AAEL010860,AAEL011134,AAEL014771,	44.4	5.77	9.62	0.00321978	0.076917	1
GO:0071310	cellular response to organic substance	34	8	AAEL006792,AAEL007397,AAEL008696,AAEL009588,AAEL010377,AAEL012471,AAEL019466,AAEL024053,	23.5	3.05	3.71	0.00359347	0.081727	1
GO:0006468	protein phosphorylation	244	31	AAEL000343,AAEL002895,AAEL003013,AAEL003245,AAEL004319,AAEL004351,AAEL007375,AAEL008078,AAEL008306,AAEL008585,AAEL008621,AAEL009880,AAEL009991,AAEL010374,AAEL011594,AAEL012553,AAEL017338,AAEL019473,AAEL019511,AAEL019631,AAEL019731,AAEL019734,AAEL019843,AAEL020848,AAEL021353,AAEL024053,AAEL025224,AAEL025514,AAEL025664,AAEL027062,AAEL027566,	12.7	1.65	1.77	0.00392116	0.081727	1
GO:0051648	vesicle localization	5	3	AAEL001582,AAEL002714,AAEL027393,	60	7.79	18.03	0.00404997	0.081727	1
GO:0051650	establishment of vesicle localization	5	3	AAEL001582,AAEL002714,AAEL027393,	60	7.79	18.03	0.00404997	0.081727	1
GO:0044087	regulation of cellular component biogenesis	21	6	AAEL001904,AAEL004475,AAEL005419,AAEL007546,AAEL009059,AAEL027716,	28.6	3.71	4.82	0.0040798	0.081727	1
GO:0044093	positive regulation of molecular function	66	12	AAEL000450,AAEL001252,AAEL002389,AAEL002438,AAEL003487,AAEL003883,AAEL004480,AAEL005303,AAEL008842,AAEL018350,AAEL020851,AAEL026811,	18.2	2.36	2.69	0.00413613	0.081727	1
GO:0007166	cell surface receptor signaling pathway	119	18	AAEL000618,AAEL002346,AAEL002887,AAEL004319,AAEL006792,AAEL006957,AAEL008234,AAEL008696,AAEL010374,AAEL010401,AAEL012466,AAEL012471,AAEL017503,AAEL019466,AAEL020203,AAEL024053,AAEL025606,AAEL027566,	15.1	1.96	2.16	0.00427222	0.081727	1
GO:0033043	regulation of organelle organization	35	8	AAEL001904,AAEL004475,AAEL005419,AAEL007546,AAEL009059,AAEL013768,AAEL025664,AAEL027716,	22.9	2.97	3.57	0.00435	0.081727	1
GO:0009968	negative regulation of signal transduction	10	4	AAEL000450,AAEL006792,AAEL020203,AAEL025498,	40	5.19	8.02	0.00504145	0.081727	1
GO:0010648	negative regulation of cell communication	10	4	AAEL000450,AAEL006792,AAEL020203,AAEL025498,	40	5.19	8.02	0.00504145	0.081727	1
GO:0023057	negative regulation of signaling	10	4	AAEL000450,AAEL006792,AAEL020203,AAEL025498,	40	5.19	8.02	0.00504145	0.081727	1
GO:0007178	transmembrane receptor protein serine/threonine kinase signaling pathway	10	4	AAEL008696,AAEL019466,AAEL024053,AAEL027566,	40	5.19	8.02	0.00504145	0.081727	1
GO:0016485	protein processing	16	5	AAEL001789,AAEL002389,AAEL004633,AAEL017503,AAEL020851,	31.3	4.06	5.47	0.00571903	0.081727	1
GO:0035039	male pronucleus assembly	2	2	AAEL002597,AAEL023576,	100	12.98	inf	0.00592996	0.081727	1
GO:0072383	plus-end-directed vesicle transport along microtubule	2	2	AAEL001582,AAEL002714,	100	12.98	inf	0.00592996	0.081727	1
GO:0007338	single fertilization	2	2	AAEL002597,AAEL023576,	100	12.98	inf	0.00592996	0.081727	1
GO:0001775	cell activation	2	2	AAEL002597,AAEL023576,	100	12.98	inf	0.00592996	0.081727	1
GO:0035038	female pronucleus assembly	2	2	AAEL002597,AAEL023576,	100	12.98	inf	0.00592996	0.081727	1
GO:0007343	egg activation	2	2	AAEL002597,AAEL023576,	100	12.98	inf	0.00592996	0.081727	1
GO:0046131	pyrimidine ribonucleoside metabolic process	2	2	AAEL006518,AAEL025432,	100	12.98	inf	0.00592996	0.081727	1
GO:0006216	cytidine catabolic process	2	2	AAEL006518,AAEL025432,	100	12.98	inf	0.00592996	0.081727	1
GO:0046087	cytidine metabolic process	2	2	AAEL006518,AAEL025432,	100	12.98	inf	0.00592996	0.081727	1
GO:0009566	fertilization	2	2	AAEL002597,AAEL023576,	100	12.98	inf	0.00592996	0.081727	1
GO:0031032	actomyosin structure organization	2	2	AAEL002714,AAEL008303,	100	12.98	inf	0.00592996	0.081727	1
GO:0046133	pyrimidine ribonucleoside catabolic process	2	2	AAEL006518,AAEL025432,	100	12.98	inf	0.00592996	0.081727	1
GO:0072386	plus-end-directed organelle transport along microtubule	2	2	AAEL001582,AAEL002714,	100	12.98	inf	0.00592996	0.081727	1
GO:0034773	histone H4-K20 trimethylation	2	2	AAEL008027,AAEL026494,	100	12.98	inf	0.00592996	0.081727	1
GO:0046135	pyrimidine nucleoside catabolic process	2	2	AAEL006518,AAEL025432,	100	12.98	inf	0.00592996	0.081727	1
GO:0046348	amino sugar catabolic process	2	2	AAEL013262,AAEL013877,	100	12.98	inf	0.00592996	0.081727	1
GO:1901072	glucosamine-containing compound catabolic process	2	2	AAEL013262,AAEL013877,	100	12.98	inf	0.00592996	0.081727	1
GO:0034770	histone H4-K20 methylation	2	2	AAEL008027,AAEL026494,	100	12.98	inf	0.00592996	0.081727	1
GO:0009972	cytidine deamination	2	2	AAEL006518,AAEL025432,	100	12.98	inf	0.00592996	0.081727	1
GO:0006213	pyrimidine nucleoside metabolic process	2	2	AAEL006518,AAEL025432,	100	12.98	inf	0.00592996	0.081727	1
GO:0048585	negative regulation of response to stimulus	11	4	AAEL000450,AAEL006792,AAEL020203,AAEL025498,	36.4	4.72	6.87	0.00744409	0.101296	1
GO:0043085	positive regulation of catalytic activity	55	10	AAEL000450,AAEL001252,AAEL002389,AAEL003487,AAEL003883,AAEL004480,AAEL005303,AAEL018350,AAEL020851,AAEL026811,	18.2	2.36	2.68	0.00851008	0.114354	1
GO:0006796	phosphate-containing compound metabolic process	618	64	AAEL000194,AAEL000258,AAEL000275,AAEL000343,AAEL000575,AAEL000845,AAEL002781,AAEL002895,AAEL003013,AAEL003143,AAEL003245,AAEL003289,AAEL003297,AAEL003298,AAEL003317,AAEL003402,AAEL003903,AAEL003915,AAEL004319,AAEL004351,AAEL004709,AAEL004853,AAEL005177,AAEL006317,AAEL006834,AAEL006990,AAEL007375,AAEL008078,AAEL008306,AAEL008528,AAEL008585,AAEL008621,AAEL009294,AAEL009880,AAEL009991,AAEL010206,AAE…	10.4	1.34	1.41	0.00865058	0.114807	1
GO:0055082	cellular chemical homeostasis	18	5	AAEL003837,AAEL004211,AAEL007383,AAEL007385,AAEL019972,	27.8	3.61	4.63	0.00986224	0.128364	1
GO:0006793	phosphorus metabolic process	622	64	AAEL000194,AAEL000258,AAEL000275,AAEL000343,AAEL000575,AAEL000845,AAEL002781,AAEL002895,AAEL003013,AAEL003143,AAEL003245,AAEL003289,AAEL003297,AAEL003298,AAEL003317,AAEL003402,AAEL003903,AAEL003915,AAEL004319,AAEL004351,AAEL004709,AAEL004853,AAEL005177,AAEL006317,AAEL006834,AAEL006990,AAEL007375,AAEL008078,AAEL008306,AAEL008528,AAEL008585,AAEL008621,AAEL009294,AAEL009880,AAEL009991,AAEL010206,AAE…	10.3	1.34	1.4	0.00991089	0.128364	1
GO:0010033	response to organic substance	48	9	AAEL003705,AAEL006792,AAEL007397,AAEL008696,AAEL009588,AAEL010377,AAEL012471,AAEL019466,AAEL024053,	18.8	2.43	2.78	0.0100465	0.128572	1
GO:0065009	regulation of molecular function	140	19	AAEL000450,AAEL000551,AAEL001252,AAEL002389,AAEL002438,AAEL003487,AAEL003883,AAEL004480,AAEL004492,AAEL005303,AAEL008842,AAEL009668,AAEL013287,AAEL017319,AAEL018350,AAEL020191,AAEL020851,AAEL023279,AAEL026811,	13.6	1.76	1.9	0.0109257	0.138178	1
GO:0048878	chemical homeostasis	27	6	AAEL002051,AAEL003837,AAEL004211,AAEL007383,AAEL007385,AAEL019972,	22.2	2.88	3.44	0.0149822	0.187277	1
GO:0051179	localization	996	95	AAEL000985,AAEL001047,AAEL001144,AAEL001190,AAEL001223,AAEL001336,AAEL001385,AAEL001543,AAEL001582,AAEL001698,AAEL001808,AAEL002051,AAEL002163,AAEL002240,AAEL002714,AAEL003064,AAEL003416,AAEL003518,AAEL003743,AAEL003758,AAEL003837,AAEL004141,AAEL004168,AAEL004211,AAEL004237,AAEL004513,AAEL004905,AAEL004981,AAEL005276,AAEL005339,AAEL005655,AAEL006002,AAEL006139,AAEL006432,AAEL006862,AAEL007282,AAE…	9.5	1.24	1.3	0.0153268	0.187799	1
GO:0051128	regulation of cellular component organization	43	8	AAEL001904,AAEL004475,AAEL005419,AAEL007546,AAEL009059,AAEL013768,AAEL025664,AAEL027716,	18.6	2.41	2.75	0.015548	0.187799	1
GO:0043087	regulation of GTPase activity	43	8	AAEL000450,AAEL001252,AAEL003487,AAEL003883,AAEL005303,AAEL009668,AAEL018350,AAEL026811,	18.6	2.41	2.75	0.015548	0.187799	1
GO:0055114	obsolete oxidation-reduction process	671	67	AAEL000164,AAEL000813,AAEL001667,AAEL001925,AAEL002031,AAEL002039,AAEL002309,AAEL002406,AAEL002581,AAEL003599,AAEL003831,AAEL004137,AAEL005769,AAEL005921,AAEL006224,AAEL006271,AAEL006795,AAEL006834,AAEL007033,AAEL007370,AAEL007383,AAEL007385,AAEL007795,AAEL007798,AAEL007815,AAEL007816,AAEL008006,AAEL009029,AAEL009117,AAEL009120,AAEL009125,AAEL009129,AAEL009132,AAEL009547,AAEL009676,AAEL009948,AAE…	10	1.3	1.36	0.0158832	0.189716	1
GO:0050790	regulation of catalytic activity	126	17	AAEL000450,AAEL000551,AAEL001252,AAEL002389,AAEL003487,AAEL003883,AAEL004480,AAEL004492,AAEL005303,AAEL009668,AAEL013287,AAEL017319,AAEL018350,AAEL020191,AAEL020851,AAEL023279,AAEL026811,	13.5	1.75	1.89	0.0163766	0.190989	1
GO:0006102	isocitrate metabolic process	3	2	AAEL020590,AAEL028182,	66.7	8.65	24.01	0.0168781	0.190989	1
GO:0032456	endocytic recycling	3	2	AAEL010860,AAEL013252,	66.7	8.65	24.01	0.0168781	0.190989	1
GO:0035966	response to topologically incorrect protein	3	2	AAEL003705,AAEL010377,	66.7	8.65	24.01	0.0168781	0.190989	1
GO:0018023	peptidyl-lysine trimethylation	3	2	AAEL008027,AAEL026494,	66.7	8.65	24.01	0.0168781	0.190989	1
GO:0010646	regulation of cell communication	70	11	AAEL000450,AAEL000993,AAEL002438,AAEL002646,AAEL004056,AAEL006792,AAEL010572,AAEL012475,AAEL020203,AAEL021839,AAEL025498,	15.7	2.04	2.25	0.0174323	0.195205	1
GO:0005996	monosaccharide metabolic process	28	6	AAEL002781,AAEL006317,AAEL010206,AAEL010590,AAEL010653,AAEL014958,	21.4	2.78	3.28	0.0178589	0.197921	1
GO:0023051	regulation of signaling	71	11	AAEL000450,AAEL000993,AAEL002438,AAEL002646,AAEL004056,AAEL006792,AAEL010572,AAEL012475,AAEL020203,AAEL021839,AAEL025498,	15.5	2.01	2.21	0.0192427	0.211081	1
GO:0016311	dephosphorylation	110	15	AAEL000258,AAEL000845,AAEL003143,AAEL003289,AAEL003297,AAEL003298,AAEL003317,AAEL003903,AAEL003915,AAEL004709,AAEL008528,AAEL011216,AAEL011510,AAEL029070,AAEL029071,	13.6	1.77	1.91	0.0212768	0.231036	1
GO:0051234	establishment of localization	977	92	AAEL000985,AAEL001047,AAEL001144,AAEL001190,AAEL001336,AAEL001385,AAEL001543,AAEL001582,AAEL001698,AAEL001808,AAEL002051,AAEL002163,AAEL002240,AAEL002714,AAEL003064,AAEL003416,AAEL003518,AAEL003743,AAEL003758,AAEL003837,AAEL004141,AAEL004168,AAEL004211,AAEL004237,AAEL004513,AAEL004905,AAEL004981,AAEL005276,AAEL005339,AAEL005655,AAEL006002,AAEL006139,AAEL006432,AAEL006862,AAEL007282,AAEL007383,AAE…	9.4	1.22	1.27	0.0229279	0.246475	1
GO:1901136	carbohydrate derivative catabolic process	22	5	AAEL006518,AAEL009474,AAEL013262,AAEL013877,AAEL025432,	22.7	2.95	3.54	0.0234703	0.249808	1
GO:0015914	phospholipid transport	15	4	AAEL002163,AAEL004141,AAEL004981,AAEL019580,	26.7	3.46	4.37	0.0240494	0.25226	1
GO:0043547	positive regulation of GTPase activity	38	7	AAEL000450,AAEL001252,AAEL003487,AAEL003883,AAEL005303,AAEL018350,AAEL026811,	18.4	2.39	2.72	0.0241934	0.25226	1
GO:0006810	transport	968	91	AAEL000985,AAEL001047,AAEL001144,AAEL001190,AAEL001336,AAEL001385,AAEL001543,AAEL001582,AAEL001698,AAEL001808,AAEL002051,AAEL002163,AAEL002240,AAEL002714,AAEL003064,AAEL003416,AAEL003518,AAEL003743,AAEL003758,AAEL003837,AAEL004141,AAEL004168,AAEL004211,AAEL004237,AAEL004513,AAEL004905,AAEL004981,AAEL005276,AAEL005339,AAEL005655,AAEL006002,AAEL006139,AAEL006432,AAEL006862,AAEL007282,AAEL007383,AAE…	9.4	1.22	1.27	0.0245381	0.25226	1
GO:0006928	movement of cell or subcellular component	83	12	AAEL000822,AAEL001223,AAEL001582,AAEL002714,AAEL006958,AAEL009227,AAEL010568,AAEL010803,AAEL013969,AAEL014084,AAEL027393,AAEL028163,	14.5	1.88	2.04	0.0246393	0.25226	1
GO:0009966	regulation of signal transduction	65	10	AAEL000450,AAEL000993,AAEL002646,AAEL004056,AAEL006792,AAEL010572,AAEL012475,AAEL020203,AAEL021839,AAEL025498,	15.4	2	2.19	0.0260995	0.264689	1
GO:0051345	positive regulation of hydrolase activity	39	7	AAEL000450,AAEL001252,AAEL003487,AAEL003883,AAEL005303,AAEL018350,AAEL026811,	17.9	2.33	2.63	0.0275924	0.270123	1
GO:0022610	biological adhesion	75	11	AAEL000900,AAEL002887,AAEL003708,AAEL003754,AAEL005432,AAEL006958,AAEL008639,AAEL011343,AAEL012466,AAEL013461,AAEL022058,	14.7	1.9	2.07	0.0278927	0.270123	1
GO:0007155	cell adhesion	75	11	AAEL000900,AAEL002887,AAEL003708,AAEL003754,AAEL005432,AAEL006958,AAEL008639,AAEL011343,AAEL012466,AAEL013461,AAEL022058,	14.7	1.9	2.07	0.0278927	0.270123	1
GO:0050801	ion homeostasis	23	5	AAEL002051,AAEL003837,AAEL004211,AAEL007383,AAEL007385,	21.7	2.82	3.34	0.028143	0.270123	1
GO:0098771	inorganic ion homeostasis	23	5	AAEL002051,AAEL003837,AAEL004211,AAEL007383,AAEL007385,	21.7	2.82	3.34	0.028143	0.270123	1
GO:0055080	cation homeostasis	23	5	AAEL002051,AAEL003837,AAEL004211,AAEL007383,AAEL007385,	21.7	2.82	3.34	0.028143	0.270123	1
GO:0015748	organophosphate ester transport	16	4	AAEL002163,AAEL004141,AAEL004981,AAEL019580,	25	3.24	4.01	0.0301596	0.279496	1
GO:0006875	cellular metal ion homeostasis	16	4	AAEL003837,AAEL004211,AAEL007383,AAEL007385,	25	3.24	4.01	0.0301596	0.279496	1
GO:0006873	cellular ion homeostasis	16	4	AAEL003837,AAEL004211,AAEL007383,AAEL007385,	25	3.24	4.01	0.0301596	0.279496	1
GO:0030003	cellular cation homeostasis	16	4	AAEL003837,AAEL004211,AAEL007383,AAEL007385,	25	3.24	4.01	0.0301596	0.279496	1
GO:0055129	L-proline biosynthetic process	4	2	AAEL006834,AAEL007033,	50	6.49	12	0.0320376	0.28383	1
GO:0019991	septate junction assembly	4	2	AAEL002578,AAEL010558,	50	6.49	12	0.0320376	0.28383	1
GO:0006561	proline biosynthetic process	4	2	AAEL006834,AAEL007033,	50	6.49	12	0.0320376	0.28383	1
GO:0032509	endosome transport via multivesicular body sorting pathway	4	2	AAEL010945,AAEL011556,	50	6.49	12	0.0320376	0.28383	1
GO:1902532	negative regulation of intracellular signal transduction	4	2	AAEL000450,AAEL006792,	50	6.49	12	0.0320376	0.28383	1
GO:0007018	microtubule-based movement	58	9	AAEL000822,AAEL001582,AAEL002714,AAEL009227,AAEL010568,AAEL010803,AAEL014084,AAEL027393,AAEL028163,	15.5	2.01	2.21	0.0322114	0.28383	1
GO:0022406	membrane docking	10	3	AAEL004211,AAEL007282,AAEL009169,	30	3.89	5.15	0.0363068	0.293711	1
GO:0032006	regulation of TOR signaling	10	3	AAEL004056,AAEL006792,AAEL010572,	30	3.89	5.15	0.0363068	0.293711	1
GO:0032367	intracellular cholesterol transport	10	3	AAEL009956,AAEL012064,AAEL026174,	30	3.89	5.15	0.0363068	0.293711	1
GO:0030301	cholesterol transport	10	3	AAEL009956,AAEL012064,AAEL026174,	30	3.89	5.15	0.0363068	0.293711	1
GO:0007169	transmembrane receptor protein tyrosine kinase signaling pathway	10	3	AAEL004319,AAEL006792,AAEL010374,	30	3.89	5.15	0.0363068	0.293711	1
GO:0140056	organelle localization by membrane tethering	10	3	AAEL004211,AAEL007282,AAEL009169,	30	3.89	5.15	0.0363068	0.293711	1
GO:0018212	peptidyl-tyrosine modification	33	6	AAEL004319,AAEL010374,AAEL012553,AAEL019511,AAEL021353,AAEL024410,	18.2	2.36	2.67	0.0379115	0.293711	1
GO:0048583	regulation of response to stimulus	70	10	AAEL000450,AAEL000993,AAEL002646,AAEL004056,AAEL006792,AAEL010572,AAEL012475,AAEL020203,AAEL021839,AAEL025498,	14.3	1.85	2.01	0.0410584	0.293711	1
GO:0051336	regulation of hydrolase activity	80	11	AAEL000450,AAEL000551,AAEL001252,AAEL003487,AAEL003883,AAEL005303,AAEL009668,AAEL013287,AAEL017319,AAEL018350,AAEL026811,	13.8	1.78	1.92	0.0422471	0.293711	1
GO:0045184	establishment of protein localization	183	21	AAEL001144,AAEL001385,AAEL001543,AAEL002240,AAEL003416,AAEL003758,AAEL004168,AAEL004237,AAEL005276,AAEL005339,AAEL005655,AAEL009147,AAEL009183,AAEL010368,AAEL010559,AAEL010731,AAEL010945,AAEL011134,AAEL012960,AAEL019488,AAEL022990,	11.5	1.49	1.57	0.0425838	0.293711	1
GO:0072527	pyrimidine-containing compound metabolic process	18	4	AAEL001925,AAEL006518,AAEL013305,AAEL025432,	22.2	2.88	3.43	0.044885	0.293711	1
GO:0019318	hexose metabolic process	26	5	AAEL002781,AAEL006317,AAEL010590,AAEL010653,AAEL014958,	19.2	2.5	2.86	0.04551	0.293711	1
GO:0010970	transport along microtubule	11	3	AAEL001582,AAEL002714,AAEL027393,	27.3	3.54	4.5	0.0471303	0.293711	1
GO:0051656	establishment of organelle localization	11	3	AAEL001582,AAEL002714,AAEL027393,	27.3	3.54	4.5	0.0471303	0.293711	1
GO:0099111	microtubule-based transport	11	3	AAEL001582,AAEL002714,AAEL027393,	27.3	3.54	4.5	0.0471303	0.293711	1
GO:0032366	intracellular sterol transport	11	3	AAEL009956,AAEL012064,AAEL026174,	27.3	3.54	4.5	0.0471303	0.293711	1
GO:0015918	sterol transport	11	3	AAEL009956,AAEL012064,AAEL026174,	27.3	3.54	4.5	0.0471303	0.293711	1
GO:1902531	regulation of intracellular signal transduction	35	6	AAEL000450,AAEL002646,AAEL004056,AAEL006792,AAEL010572,AAEL012475,	17.1	2.22	2.49	0.0488212	0.293711	1

## Sheet: 18-24hp_MF
ID	Name	Bgd count	Result count	Result gene list	Pct of bgd	Fold enrichment	Odds ratio	P-value	Benjamini	Bonferroni
GO:0008092	cytoskeletal protein binding	147	35	AAEL000822,AAEL000900,AAEL001104,AAEL001582,AAEL001904,AAEL002714,AAEL003754,AAEL003855,AAEL004176,AAEL004475,AAEL005303,AAEL005419,AAEL007546,AAEL008303,AAEL008863,AAEL009227,AAEL009371,AAEL009991,AAEL010568,AAEL010803,AAEL013074,AAEL013461,AAEL013661,AAEL013768,AAEL014084,AAEL019939,AAEL021429,AAEL022058,AAEL022609,AAEL024186,AAEL024528,AAEL026939,AAEL027393,AAEL027716,AAEL028163,	23.8	3.09	3.86	1.09527e-09	5.80493e-07	5.80493e-07
GO:0003779	actin binding	83	21	AAEL000900,AAEL001104,AAEL001904,AAEL003754,AAEL003855,AAEL004475,AAEL005419,AAEL007546,AAEL008303,AAEL009371,AAEL009991,AAEL013074,AAEL013461,AAEL013661,AAEL013768,AAEL019939,AAEL021429,AAEL022058,AAEL024186,AAEL024528,AAEL027716,	25.3	3.28	4.13	8.1353e-07	0.000215585	0.000431171
GO:0004035	alkaline phosphatase activity	9	6	AAEL003289,AAEL003297,AAEL003298,AAEL003317,AAEL029070,AAEL029071,	66.7	8.65	24.12	1.41092e-05	0.00249262	0.00747786
GO:0008017	microtubule binding	48	13	AAEL000822,AAEL001582,AAEL002714,AAEL004176,AAEL008863,AAEL009227,AAEL009371,AAEL010568,AAEL010803,AAEL014084,AAEL026939,AAEL027393,AAEL028163,	27.1	3.52	4.5	4.6929e-05	0.00621809	0.0248724
GO:0015631	tubulin binding	61	14	AAEL000822,AAEL001582,AAEL002714,AAEL004176,AAEL005303,AAEL008863,AAEL009227,AAEL009371,AAEL010568,AAEL010803,AAEL014084,AAEL026939,AAEL027393,AAEL028163,	23	2.98	3.61	0.000172093	0.0182419	0.0912094
GO:0004197	cysteine-type endopeptidase activity	23	8	AAEL003444,AAEL003951,AAEL003952,AAEL005955,AAEL005956,AAEL011562,AAEL017498,AAEL026744,	34.8	4.51	6.44	0.000207148	0.0182981	0.109788
GO:0003824	catalytic activity	3624	324	AAEL000099,AAEL000101,AAEL000164,AAEL000194,AAEL000248,AAEL000258,AAEL000271,AAEL000275,AAEL000343,AAEL000575,AAEL000581,AAEL000651,AAEL000658,AAEL000813,AAEL000845,AAEL001152,AAEL001159,AAEL001334,AAEL001389,AAEL001396,AAEL001480,AAEL001490,AAEL001548,AAEL001565,AAEL001586,AAEL001667,AAEL001789,AAEL001925,AAEL002031,AAEL002039,AAEL002119,AAEL002155,AAEL002219,AAEL002269,AAEL002301,AAEL002309,AAE…	8.9	1.16	1.28	0.000439091	0.0222978	0.232718
GO:0008289	lipid binding	59	13	AAEL001483,AAEL002646,AAEL003416,AAEL003758,AAEL004211,AAEL004791,AAEL005655,AAEL007310,AAEL009169,AAEL010731,AAEL011556,AAEL016972,AAEL024186,	22	2.86	3.42	0.000446033	0.0222978	0.236398
GO:0004565	beta-galactosidase activity	3	3	AAEL004575,AAEL004580,AAEL004582,	100	12.98	inf	0.000455904	0.0222978	0.241629
GO:0015925	galactosidase activity	3	3	AAEL004575,AAEL004580,AAEL004582,	100	12.98	inf	0.000455904	0.0222978	0.241629
GO:0045296	cadherin binding	6	4	AAEL000900,AAEL002887,AAEL003754,AAEL022058,	66.7	8.65	24.07	0.000462784	0.0222978	0.245276
GO:0050839	cell adhesion molecule binding	7	4	AAEL000900,AAEL002887,AAEL003754,AAEL022058,	57.1	7.42	16.04	0.00101391	0.0431703	0.537374
GO:0016773	phosphotransferase activity, alcohol group as acceptor	295	38	AAEL000343,AAEL002781,AAEL002895,AAEL003013,AAEL003245,AAEL004319,AAEL004351,AAEL004853,AAEL006317,AAEL007088,AAEL007375,AAEL008078,AAEL008306,AAEL008585,AAEL008621,AAEL009880,AAEL009991,AAEL010206,AAEL010374,AAEL011274,AAEL011594,AAEL012553,AAEL014958,AAEL017338,AAEL019473,AAEL019511,AAEL019631,AAEL019731,AAEL019734,AAEL019843,AAEL020848,AAEL021353,AAEL024053,AAEL025224,AAEL025514,AAEL025664,AAE…	12.9	1.67	1.81	0.0011631	0.0431703	0.616443
GO:0000166	nucleotide binding	1105	112	AAEL000164,AAEL000248,AAEL000258,AAEL000343,AAEL000575,AAEL000813,AAEL000822,AAEL000874,AAEL001543,AAEL001582,AAEL002119,AAEL002155,AAEL002671,AAEL002714,AAEL002781,AAEL002895,AAEL002938,AAEL003013,AAEL003245,AAEL003449,AAEL003518,AAEL003529,AAEL003599,AAEL003817,AAEL004137,AAEL004319,AAEL004351,AAEL004448,AAEL004668,AAEL004981,AAEL005071,AAEL005177,AAEL005197,AAEL005493,AAEL005662,AAEL005769,AAE…	10.1	1.32	1.4	0.0012218	0.0431703	0.647554
GO:1901265	nucleoside phosphate binding	1105	112	AAEL000164,AAEL000248,AAEL000258,AAEL000343,AAEL000575,AAEL000813,AAEL000822,AAEL000874,AAEL001543,AAEL001582,AAEL002119,AAEL002155,AAEL002671,AAEL002714,AAEL002781,AAEL002895,AAEL002938,AAEL003013,AAEL003245,AAEL003449,AAEL003518,AAEL003529,AAEL003599,AAEL003817,AAEL004137,AAEL004319,AAEL004351,AAEL004448,AAEL004668,AAEL004981,AAEL005071,AAEL005177,AAEL005197,AAEL005493,AAEL005662,AAEL005769,AAE…	10.1	1.32	1.4	0.0012218	0.0431703	0.647554
GO:0000981	DNA-binding transcription factor activity, RNA polymerase II-specific	12	5	AAEL000623,AAEL004802,AAEL007271,AAEL007397,AAEL009588,	41.7	5.41	8.6	0.00134403	0.0445211	0.712338
GO:0030695	GTPase regulator activity	83	15	AAEL000450,AAEL001244,AAEL001252,AAEL003487,AAEL003883,AAEL004819,AAEL005303,AAEL005347,AAEL010572,AAEL018350,AAEL023279,AAEL023547,AAEL025130,AAEL025514,AAEL026811,	18.1	2.35	2.67	0.00151863	0.0447153	0.804875
GO:0060589	nucleoside-triphosphatase regulator activity	83	15	AAEL000450,AAEL001244,AAEL001252,AAEL003487,AAEL003883,AAEL004819,AAEL005303,AAEL005347,AAEL010572,AAEL018350,AAEL023279,AAEL023547,AAEL025130,AAEL025514,AAEL026811,	18.1	2.35	2.67	0.00151863	0.0447153	0.804875
GO:0016787	hydrolase activity	1527	147	AAEL000099,AAEL000248,AAEL000258,AAEL000271,AAEL000575,AAEL000581,AAEL000845,AAEL001159,AAEL001490,AAEL001789,AAEL002119,AAEL002155,AAEL002301,AAEL002385,AAEL002585,AAEL002636,AAEL003066,AAEL003143,AAEL003289,AAEL003297,AAEL003298,AAEL003317,AAEL003402,AAEL003444,AAEL003723,AAEL003817,AAEL003903,AAEL003915,AAEL003951,AAEL003952,AAEL004092,AAEL004138,AAEL004460,AAEL004575,AAEL004580,AAEL004582,AAE…	9.6	1.25	1.33	0.00182796	0.0509906	0.968821
GO:0042578	phosphoric ester hydrolase activity	138	21	AAEL000258,AAEL000845,AAEL003289,AAEL003297,AAEL003298,AAEL003317,AAEL003402,AAEL003903,AAEL003915,AAEL004709,AAEL006990,AAEL008528,AAEL008807,AAEL010541,AAEL011216,AAEL011510,AAEL018273,AAEL019711,AAEL021395,AAEL029070,AAEL029071,	15.2	1.98	2.18	0.0019702	0.0522102	1
GO:0005506	iron ion binding	205	28	AAEL002031,AAEL003831,AAEL006795,AAEL007383,AAEL007385,AAEL007795,AAEL007798,AAEL007815,AAEL007816,AAEL009117,AAEL009120,AAEL009125,AAEL009129,AAEL009132,AAEL010154,AAEL013554,AAEL013556,AAEL013798,AAEL014019,AAEL014493,AAEL014605,AAEL014619,AAEL017061,AAEL018110,AAEL019504,AAEL026582,AAEL026787,AAEL028635,	13.7	1.77	1.93	0.00211128	0.0532846	1
GO:0043167	ion binding	2684	242	AAEL000164,AAEL000248,AAEL000258,AAEL000287,AAEL000343,AAEL000813,AAEL000822,AAEL000857,AAEL000874,AAEL001212,AAEL001334,AAEL001473,AAEL001480,AAEL001543,AAEL001582,AAEL001587,AAEL001667,AAEL001724,AAEL001925,AAEL002031,AAEL002039,AAEL002119,AAEL002155,AAEL002388,AAEL002419,AAEL002671,AAEL002714,AAEL002781,AAEL002816,AAEL002895,AAEL002938,AAEL003013,AAEL003245,AAEL003295,AAEL003402,AAEL003449,AAE…	9	1.17	1.26	0.00222475	0.0535963	1
GO:0005543	phospholipid binding	39	9	AAEL002646,AAEL003416,AAEL003758,AAEL004791,AAEL005655,AAEL007310,AAEL010731,AAEL011556,AAEL024186,	23.1	3	3.62	0.00236384	0.0544712	1
GO:0004553	hydrolase activity, hydrolyzing O-glycosyl compounds	88	15	AAEL003066,AAEL003723,AAEL004575,AAEL004580,AAEL004582,AAEL004661,AAEL005460,AAEL006151,AAEL007673,AAEL008452,AAEL009176,AAEL010653,AAEL013262,AAEL022879,AAEL025658,	17	2.21	2.49	0.00276394	0.060893	1
GO:0016301	kinase activity	353	42	AAEL000194,AAEL000275,AAEL000343,AAEL002781,AAEL002895,AAEL003013,AAEL003245,AAEL004319,AAEL004351,AAEL004853,AAEL006317,AAEL006834,AAEL007375,AAEL008078,AAEL008306,AAEL008585,AAEL008621,AAEL009294,AAEL009880,AAEL009991,AAEL010206,AAEL010374,AAEL011274,AAEL011594,AAEL012553,AAEL014958,AAEL017338,AAEL019473,AAEL019511,AAEL019631,AAEL019731,AAEL019734,AAEL019843,AAEL020848,AAEL021353,AAEL024053,AAE…	11.9	1.54	1.65	0.00307242	0.060893	1
GO:0032555	purine ribonucleotide binding	940	95	AAEL000248,AAEL000343,AAEL000822,AAEL000874,AAEL001543,AAEL001582,AAEL002119,AAEL002155,AAEL002671,AAEL002714,AAEL002781,AAEL002895,AAEL002938,AAEL003013,AAEL003245,AAEL003449,AAEL003518,AAEL003529,AAEL003599,AAEL003817,AAEL004319,AAEL004351,AAEL004448,AAEL004668,AAEL004981,AAEL005071,AAEL005177,AAEL005197,AAEL005493,AAEL005662,AAEL005905,AAEL006834,AAEL007288,AAEL007375,AAEL007525,AAEL008078,AAE…	10.1	1.31	1.39	0.00315994	0.060893	1
GO:0035639	purine ribonucleoside triphosphate binding	930	94	AAEL000248,AAEL000343,AAEL000822,AAEL001543,AAEL001582,AAEL002119,AAEL002155,AAEL002671,AAEL002714,AAEL002781,AAEL002895,AAEL002938,AAEL003013,AAEL003245,AAEL003449,AAEL003518,AAEL003529,AAEL003599,AAEL003817,AAEL004319,AAEL004351,AAEL004448,AAEL004668,AAEL004981,AAEL005071,AAEL005177,AAEL005197,AAEL005493,AAEL005662,AAEL005905,AAEL006834,AAEL007288,AAEL007375,AAEL007525,AAEL008078,AAEL008179,AAE…	10.1	1.31	1.39	0.00330885	0.060893	1
GO:0004497	monooxygenase activity	163	23	AAEL000813,AAEL002031,AAEL006795,AAEL007795,AAEL007798,AAEL007815,AAEL007816,AAEL009117,AAEL009120,AAEL009125,AAEL009129,AAEL009132,AAEL010154,AAEL013554,AAEL013556,AAEL013798,AAEL014019,AAEL014605,AAEL014619,AAEL017061,AAEL019504,AAEL019688,AAEL028635,	14.1	1.83	1.99	0.00335602	0.060893	1
GO:0017076	purine nucleotide binding	942	95	AAEL000248,AAEL000343,AAEL000822,AAEL000874,AAEL001543,AAEL001582,AAEL002119,AAEL002155,AAEL002671,AAEL002714,AAEL002781,AAEL002895,AAEL002938,AAEL003013,AAEL003245,AAEL003449,AAEL003518,AAEL003529,AAEL003599,AAEL003817,AAEL004319,AAEL004351,AAEL004448,AAEL004668,AAEL004981,AAEL005071,AAEL005177,AAEL005197,AAEL005493,AAEL005662,AAEL005905,AAEL006834,AAEL007288,AAEL007375,AAEL007525,AAEL008078,AAE…	10.1	1.31	1.39	0.00336414	0.060893	1
GO:0016798	hydrolase activity, acting on glycosyl bonds	99	16	AAEL003066,AAEL003402,AAEL003723,AAEL004575,AAEL004580,AAEL004582,AAEL004661,AAEL005460,AAEL006151,AAEL007673,AAEL008452,AAEL009176,AAEL010653,AAEL013262,AAEL022879,AAEL025658,	16.2	2.1	2.33	0.00353739	0.060893	1
GO:0043168	anion binding	1083	107	AAEL000164,AAEL000248,AAEL000343,AAEL000813,AAEL000822,AAEL000874,AAEL001543,AAEL001582,AAEL001724,AAEL002119,AAEL002155,AAEL002671,AAEL002714,AAEL002781,AAEL002895,AAEL002938,AAEL003013,AAEL003245,AAEL003449,AAEL003518,AAEL003529,AAEL003599,AAEL003817,AAEL004137,AAEL004319,AAEL004351,AAEL004448,AAEL004668,AAEL004981,AAEL005071,AAEL005177,AAEL005197,AAEL005493,AAEL005662,AAEL005769,AAEL005905,AAE…	9.9	1.28	1.36	0.00362032	0.060893	1
GO:0016705	oxidoreductase activity, acting on paired donors, with incorporation or reduction of molecular oxygen	194	26	AAEL000813,AAEL001925,AAEL002031,AAEL006795,AAEL007795,AAEL007798,AAEL007815,AAEL007816,AAEL009117,AAEL009120,AAEL009125,AAEL009129,AAEL009132,AAEL010154,AAEL013047,AAEL013554,AAEL013556,AAEL013798,AAEL014019,AAEL014605,AAEL014619,AAEL017061,AAEL019504,AAEL019688,AAEL026582,AAEL028635,	13.4	1.74	1.88	0.00387766	0.060893	1
GO:0004672	protein kinase activity	244	31	AAEL000343,AAEL002895,AAEL003013,AAEL003245,AAEL004319,AAEL004351,AAEL007375,AAEL008078,AAEL008306,AAEL008585,AAEL008621,AAEL009880,AAEL009991,AAEL010374,AAEL011594,AAEL012553,AAEL017338,AAEL019473,AAEL019511,AAEL019631,AAEL019731,AAEL019734,AAEL019843,AAEL020848,AAEL021353,AAEL024053,AAEL025224,AAEL025514,AAEL025664,AAEL027062,AAEL027566,	12.7	1.65	1.77	0.00392116	0.060893	1
GO:0003777	microtubule motor activity	42	9	AAEL000822,AAEL001582,AAEL002714,AAEL009227,AAEL010568,AAEL010803,AAEL014084,AAEL027393,AAEL028163,	21.4	2.78	3.29	0.00404015	0.060893	1
GO:0032553	ribonucleotide binding	948	95	AAEL000248,AAEL000343,AAEL000822,AAEL000874,AAEL001543,AAEL001582,AAEL002119,AAEL002155,AAEL002671,AAEL002714,AAEL002781,AAEL002895,AAEL002938,AAEL003013,AAEL003245,AAEL003449,AAEL003518,AAEL003529,AAEL003599,AAEL003817,AAEL004319,AAEL004351,AAEL004448,AAEL004668,AAEL004981,AAEL005071,AAEL005177,AAEL005197,AAEL005493,AAEL005662,AAEL005905,AAEL006834,AAEL007288,AAEL007375,AAEL007525,AAEL008078,AAE…	10	1.3	1.38	0.00404772	0.060893	1
GO:0003774	cytoskeletal motor activity	66	12	AAEL000822,AAEL001582,AAEL002714,AAEL009227,AAEL009991,AAEL010568,AAEL010803,AAEL014084,AAEL019851,AAEL024528,AAEL027393,AAEL028163,	18.2	2.36	2.69	0.00413613	0.060893	1
GO:0097367	carbohydrate derivative binding	1090	107	AAEL000248,AAEL000343,AAEL000585,AAEL000822,AAEL000874,AAEL001543,AAEL001582,AAEL002119,AAEL002155,AAEL002612,AAEL002671,AAEL002714,AAEL002781,AAEL002895,AAEL002938,AAEL003013,AAEL003066,AAEL003245,AAEL003449,AAEL003518,AAEL003529,AAEL003599,AAEL003817,AAEL004319,AAEL004351,AAEL004448,AAEL004668,AAEL004981,AAEL005071,AAEL005177,AAEL005197,AAEL005493,AAEL005662,AAEL005702,AAEL005905,AAEL006151,AAE…	9.8	1.27	1.35	0.00442201	0.0633423	1
GO:0036094	small molecule binding	1176	114	AAEL000164,AAEL000248,AAEL000258,AAEL000343,AAEL000575,AAEL000813,AAEL000822,AAEL000874,AAEL001543,AAEL001582,AAEL001724,AAEL002119,AAEL002155,AAEL002671,AAEL002714,AAEL002781,AAEL002895,AAEL002938,AAEL003013,AAEL003245,AAEL003449,AAEL003518,AAEL003529,AAEL003599,AAEL003817,AAEL004137,AAEL004319,AAEL004351,AAEL004448,AAEL004668,AAEL004981,AAEL005071,AAEL005177,AAEL005197,AAEL005493,AAEL005662,AAE…	9.7	1.26	1.33	0.00496232	0.0668698	1
GO:0019200	carbohydrate kinase activity	10	4	AAEL002781,AAEL006317,AAEL010206,AAEL014958,	40	5.19	8.02	0.00504145	0.0668698	1
GO:0051015	actin filament binding	22	6	AAEL000900,AAEL003754,AAEL003855,AAEL019939,AAEL022058,AAEL024528,	27.3	3.54	4.52	0.00525009	0.0668698	1
GO:0008374	O-acyltransferase activity	16	5	AAEL000658,AAEL007080,AAEL021382,AAEL021734,AAEL022523,	31.3	4.06	5.47	0.00571903	0.0668698	1
GO:0050699	WW domain binding	2	2	AAEL002597,AAEL023576,	100	12.98	inf	0.00592996	0.0668698	1
GO:0004335	galactokinase activity	2	2	AAEL002781,AAEL014958,	100	12.98	inf	0.00592996	0.0668698	1
GO:0005534	galactose binding	2	2	AAEL002781,AAEL014958,	100	12.98	inf	0.00592996	0.0668698	1
GO:0033743	peptide-methionine (R)-S-oxide reductase activity	2	2	AAEL002581,AAEL023523,	100	12.98	inf	0.00592996	0.0668698	1
GO:0042799	histone methyltransferase activity (H4-K20 specific)	2	2	AAEL008027,AAEL026494,	100	12.98	inf	0.00592996	0.0668698	1
GO:0004126	cytidine deaminase activity	2	2	AAEL006518,AAEL025432,	100	12.98	inf	0.00592996	0.0668698	1
GO:0008234	cysteine-type peptidase activity	63	11	AAEL000271,AAEL003444,AAEL003951,AAEL003952,AAEL005955,AAEL005956,AAEL009642,AAEL011562,AAEL017498,AAEL026744,AAEL027340,	17.5	2.27	2.55	0.00808542	0.0892765	1
GO:0035091	phosphatidylinositol binding	25	6	AAEL003416,AAEL003758,AAEL004791,AAEL005655,AAEL010731,AAEL011556,	24	3.11	3.8	0.0102226	0.11057	1
GO:0044877	protein-containing complex binding	59	10	AAEL000900,AAEL003754,AAEL003855,AAEL004480,AAEL008630,AAEL013768,AAEL019939,AAEL022058,AAEL024528,AAEL026939,	16.9	2.2	2.46	0.013854	0.146852	1
GO:0016491	oxidoreductase activity	669	67	AAEL000164,AAEL000813,AAEL001667,AAEL001925,AAEL002031,AAEL002039,AAEL002309,AAEL002581,AAEL003599,AAEL003831,AAEL004137,AAEL005769,AAEL005921,AAEL006224,AAEL006271,AAEL006795,AAEL006834,AAEL007033,AAEL007370,AAEL007383,AAEL007385,AAEL007795,AAEL007798,AAEL007815,AAEL007816,AAEL008006,AAEL009029,AAEL009117,AAEL009120,AAEL009125,AAEL009129,AAEL009132,AAEL009547,AAEL009676,AAEL009948,AAEL010154,AAE…	10	1.3	1.36	0.0149452	0.155313	1
GO:0030234	enzyme regulator activity	156	20	AAEL000450,AAEL000551,AAEL001244,AAEL001252,AAEL003487,AAEL003883,AAEL004480,AAEL004492,AAEL004819,AAEL005303,AAEL005347,AAEL010572,AAEL013287,AAEL018350,AAEL023279,AAEL023547,AAEL025055,AAEL025130,AAEL025514,AAEL026811,	12.8	1.66	1.78	0.0165914	0.156937	1
GO:0032977	membrane insertase activity	3	2	AAEL009183,AAEL027505,	66.7	8.65	24.01	0.0168781	0.156937	1
GO:0004703	G protein-coupled receptor kinase activity	3	2	AAEL019631,AAEL025224,	66.7	8.65	24.01	0.0168781	0.156937	1
GO:0004067	asparaginase activity	3	2	AAEL010938,AAEL020441,	66.7	8.65	24.01	0.0168781	0.156937	1
GO:0140597	protein carrier chaperone	3	2	AAEL009183,AAEL027505,	66.7	8.65	24.01	0.0168781	0.156937	1
GO:0004450	isocitrate dehydrogenase (NADP+) activity	3	2	AAEL020590,AAEL028182,	66.7	8.65	24.01	0.0168781	0.156937	1
GO:0032559	adenyl ribonucleotide binding	767	75	AAEL000343,AAEL000822,AAEL000874,AAEL001543,AAEL001582,AAEL002714,AAEL002781,AAEL002895,AAEL002938,AAEL003013,AAEL003245,AAEL003449,AAEL003518,AAEL003529,AAEL003599,AAEL004319,AAEL004351,AAEL004448,AAEL004981,AAEL005177,AAEL005662,AAEL005905,AAEL006834,AAEL007375,AAEL008078,AAEL008306,AAEL008386,AAEL008585,AAEL008621,AAEL008632,AAEL009154,AAEL009227,AAEL009880,AAEL009991,AAEL010374,AAEL010568,AAE…	9.8	1.27	1.33	0.01759	0.157778	1
GO:0016791	phosphatase activity	108	15	AAEL000258,AAEL000845,AAEL003289,AAEL003297,AAEL003298,AAEL003317,AAEL003903,AAEL003915,AAEL004709,AAEL006990,AAEL008528,AAEL011216,AAEL011510,AAEL029070,AAEL029071,	13.9	1.8	1.95	0.0182644	0.157778	1
GO:0005524	ATP binding	757	74	AAEL000343,AAEL000822,AAEL001543,AAEL001582,AAEL002714,AAEL002781,AAEL002895,AAEL002938,AAEL003013,AAEL003245,AAEL003449,AAEL003518,AAEL003529,AAEL003599,AAEL004319,AAEL004351,AAEL004448,AAEL004981,AAEL005177,AAEL005662,AAEL005905,AAEL006834,AAEL007375,AAEL008078,AAEL008306,AAEL008386,AAEL008585,AAEL008621,AAEL008632,AAEL009154,AAEL009227,AAEL009880,AAEL009991,AAEL010374,AAEL010568,AAEL010803,AAE…	9.8	1.27	1.33	0.018405	0.157778	1
GO:0030554	adenyl nucleotide binding	769	75	AAEL000343,AAEL000822,AAEL000874,AAEL001543,AAEL001582,AAEL002714,AAEL002781,AAEL002895,AAEL002938,AAEL003013,AAEL003245,AAEL003449,AAEL003518,AAEL003529,AAEL003599,AAEL004319,AAEL004351,AAEL004448,AAEL004981,AAEL005177,AAEL005662,AAEL005905,AAEL006834,AAEL007375,AAEL008078,AAEL008306,AAEL008386,AAEL008585,AAEL008621,AAEL008632,AAEL009154,AAEL009227,AAEL009880,AAEL009991,AAEL010374,AAEL010568,AAE…	9.8	1.27	1.32	0.0185944	0.157778	1
GO:0070001	aspartic-type peptidase activity	14	4	AAEL004138,AAEL006169,AAEL017503,AAEL020259,	28.6	3.71	4.81	0.0187547	0.157778	1
GO:0004190	aspartic-type endopeptidase activity	14	4	AAEL004138,AAEL006169,AAEL017503,AAEL020259,	28.6	3.71	4.81	0.0187547	0.157778	1
GO:0005096	GTPase activator activity	38	7	AAEL000450,AAEL001252,AAEL003487,AAEL003883,AAEL005303,AAEL018350,AAEL026811,	18.4	2.39	2.72	0.0241934	0.200351	1
GO:0020037	heme binding	194	23	AAEL002031,AAEL006795,AAEL007795,AAEL007798,AAEL007815,AAEL007816,AAEL009117,AAEL009120,AAEL009125,AAEL009129,AAEL009132,AAEL010154,AAEL013171,AAEL013554,AAEL013556,AAEL013798,AAEL014019,AAEL014605,AAEL014619,AAEL017061,AAEL019504,AAEL026582,AAEL028635,	11.9	1.54	1.63	0.0252077	0.205539	1
GO:0005515	protein binding	2286	199	AAEL000416,AAEL000450,AAEL000618,AAEL000822,AAEL000845,AAEL000874,AAEL000900,AAEL001104,AAEL001144,AAEL001212,AAEL001252,AAEL001399,AAEL001473,AAEL001565,AAEL001582,AAEL001765,AAEL001808,AAEL001876,AAEL001904,AAEL001972,AAEL002240,AAEL002346,AAEL002678,AAEL002714,AAEL002840,AAEL002854,AAEL002887,AAEL002895,AAEL003075,AAEL003127,AAEL003228,AAEL003295,AAEL003331,AAEL003416,AAEL003430,AAEL003449,AAE…	8.7	1.13	1.19	0.0256311	0.205826	1
GO:0046906	tetrapyrrole binding	195	23	AAEL002031,AAEL006795,AAEL007795,AAEL007798,AAEL007815,AAEL007816,AAEL009117,AAEL009120,AAEL009125,AAEL009129,AAEL009132,AAEL010154,AAEL013171,AAEL013554,AAEL013556,AAEL013798,AAEL014019,AAEL014605,AAEL014619,AAEL017061,AAEL019504,AAEL026582,AAEL028635,	11.8	1.53	1.62	0.0265807	0.209874	1
GO:0016646	oxidoreductase activity, acting on the CH-NH group of donors, NAD or NADP as acceptor	9	3	AAEL007033,AAEL007370,AAEL023657,	33.3	4.33	6.01	0.0269272	0.209874	1
GO:0035591	signaling adaptor activity	4	2	AAEL012475,AAEL025498,	50	6.49	12	0.0320376	0.241629	1
GO:0016811	hydrolase activity, acting on carbon-nitrogen (but not peptide) bonds, in linear amides	32	6	AAEL006034,AAEL009474,AAEL010938,AAEL011206,AAEL015411,AAEL020441,	18.8	2.43	2.78	0.0330968	0.241629	1
GO:0000287	magnesium ion binding	41	7	AAEL000258,AAEL001480,AAEL004981,AAEL009154,AAEL019580,AAEL020590,AAEL028182,	17.1	2.22	2.48	0.0353303	0.241629	1
GO:0008484	sulfuric ester hydrolase activity	10	3	AAEL004460,AAEL010437,AAEL024317,	30	3.89	5.15	0.0363068	0.241629	1
GO:0019199	transmembrane receptor protein kinase activity	17	4	AAEL004319,AAEL010374,AAEL024053,AAEL027566,	23.5	3.05	3.7	0.0371022	0.241629	1
GO:0016788	hydrolase activity, acting on ester bonds	334	35	AAEL000258,AAEL000845,AAEL001159,AAEL003289,AAEL003297,AAEL003298,AAEL003317,AAEL003402,AAEL003903,AAEL003915,AAEL004460,AAEL004709,AAEL004995,AAEL005959,AAEL006961,AAEL006966,AAEL006990,AAEL007044,AAEL008528,AAEL008807,AAEL010369,AAEL010437,AAEL010541,AAEL011216,AAEL011510,AAEL011788,AAEL012676,AAEL015038,AAEL018273,AAEL019711,AAEL019842,AAEL021395,AAEL024317,AAEL029070,AAEL029071,	10.5	1.36	1.42	0.0382234	0.241629	1
GO:0003924	GTPase activity	130	16	AAEL000248,AAEL002119,AAEL002155,AAEL003817,AAEL005071,AAEL007288,AAEL007525,AAEL008179,AAEL008630,AAEL008673,AAEL010170,AAEL012071,AAEL013252,AAEL014636,AAEL019455,AAEL026111,	12.3	1.6	1.69	0.0415255	0.241629	1
GO:0008047	enzyme activator activity	52	8	AAEL000450,AAEL001252,AAEL003487,AAEL003883,AAEL004480,AAEL005303,AAEL018350,AAEL026811,	15.4	2	2.19	0.0440439	0.241629	1
GO:0016810	hydrolase activity, acting on carbon-nitrogen (but not peptide) bonds	52	8	AAEL006034,AAEL006518,AAEL009474,AAEL010938,AAEL011206,AAEL015411,AAEL020441,AAEL025432,	15.4	2	2.19	0.0440439	0.241629	1
GO:0019239	deaminase activity	11	3	AAEL006518,AAEL013877,AAEL025432,	27.3	3.54	4.5	0.0471303	0.241629	1
GO:0016645	oxidoreductase activity, acting on the CH-NH group of donors	11	3	AAEL007033,AAEL007370,AAEL023657,	27.3	3.54	4.5	0.0471303	0.241629	1
GO:0005085	guanyl-nucleotide exchange factor activity	44	7	AAEL001244,AAEL004819,AAEL005347,AAEL010572,AAEL023547,AAEL025130,AAEL025514,	15.9	2.06	2.28	0.0494183	0.241629	1

[truncated: 18 more sheets: 24-36hp_BP, 24-36hp_MF, 36hp_BP, 36hp_MF, 48hp_BP, 48hp_MF, up_BP, up_MF, 6hb_BP, 6hb_MF, 18hb_BP, 18hb_MF, 48hb_BP, 48hb_MF, down_BP, down_MF, GeneID, membership]
