# Supplementary material for: An 11-point time course midgut transcriptome across 72 h after blood feeding provides detailed temporal resolution of transcript expression in the arbovirus vector, Aedes aegypti
Source: bioRxiv preprint, doi:10.1101/2023.03.03.531062, version 2 (2023-07-19)
Supplement: Supplemental Table S5 [file 531062_file08.xlsx]

## Sheet: All_TPM
GeneID	0_1	0_2	0_3	0_4	0_avg	1_1	1_2	1_3	1_4	1_avg	4_1	4_2	4_3	4_4	4_avg	6_1	6_2	6_3	6_4	6_avg	8_1	8_2	8_3	8_4	8_avg	12_1	12_2	12_3	12_4	12_avg	18_1	18_2	18_3	18_4	18_avg	24_1	24_2	24_3	24_4	24_avg	36_1	36_2	36_3	36_4	36_avg	48_1	48_2	48_3	48_4
AAEL005211	11.6961	11.9403	11.0716	12.4358	11.786	14.7416	10.682	11.8377	11.2217	12.1207	8.30039	7.70186	9.2074	7.74569	8.23883	8.58195	7.657	4.93996	6.85595	7.00871	9.60105	7.49004	8.23514	10.3952	8.93035	12.433	11.8364	12.2029	11.8297	12.0755	16.1825	12.9258	14.4985	13.3036	14.2276	14.7934	11.9291	12.7186	10.9388	12.595	17.5653	17.5764	20.3301	20.5491	19.0052	27.8024	25.1095	26.7099	22.2828
AAEL028050	0	0.225113	0.043379	0.112337	0.0952072	0.162821	0.117033	0	0	0.0699635	0	0	0	0	0	0.105885	0.110533	0	0	0.0541045	0.045408	0	0	0	0.011352	0	0	0	0	0	0.222297	0	0	0.120197	0.0856235	0.25575	0.127857	0	0.099974	0.120895	0.051117	0	0.224139	0.157972	0.108307	0.506188	0.216948	0.329663	0.118723
AAEL005195	0.071042	0.098955	0.135341	0.133693	0.109758	0.105937	0.189997	0.073479	0.076592	0.111501	0.046458	0.068284	0.099243	0	0.0534962	0.07288	0.043052	0	0.073881	0.0474533	0.174126	0.144428	0.110225	0.062014	0.122698	0.295997	0.296179	0.031112	0.123844	0.186783	0	0	0.314443	0.383702	0.174536	0.042371	0.072197	0.069581	0.135686	0.0799587	0.412524	0.33851	0.506216	0.547431	0.45117	0.75074	0	0.426491	0.326374
AAEL005207	0.021216	0.128865	0.040709	0	0.0476975	0.068355	0.023401	0	0	0.022939	0	0	0.017092	0.05408	0.017793	0.088347	0.09159	0.021933	0.043269	0.0612847	0.047348	0	0	0	0.011837	0.022721	0.043404	0.021466	0.063746	0.0378342	0.161591	0.052434	0.054152	0	0.0670442	0.021854	0	0.053458	0.052645	0.0319892	0.040042	0.026107	0.209931	0	0.06902	0.043484	0.053037	0.024925	0.049217
AAEL020794	3.88801	4.03542	3.57234	3.75022	3.8115	4.67186	3.16058	2.78022	2.87552	3.37204	3.41203	1.75053	3.28283	3.69976	3.03629	3.90529	3.07018	1.89918	2.98469	2.96484	5.19225	4.28248	5.06031	5.50407	5.00978	7.55384	4.44953	7.34177	6.55327	6.4746	6.66513	7.41864	7.38574	6.47038	6.98497	8.14829	5.65793	7.26458	6.90248	6.99332	12.1505	7.50962	14.8562	14.0007	12.1293	10.7984	8.18176	11.1552	7.66314
AAEL005171	7.76414	8.51623	6.41055	8.56125	7.81304	8.19012	7.65609	5.80804	6.93078	7.14626	7.50151	7.54337	7.76398	10.8462	8.41376	13.6183	11.8521	10.1617	11.1104	11.6857	7.73532	9.70225	9.29226	10.2256	9.23887	6.71973	7.62926	6.26245	6.39167	6.75078	2.51279	4.80998	4.38244	3.65233	3.83939	2.84237	6.63119	4.19201	3.18109	4.21166	4.53712	5.08902	6.87545	7.4257	5.98182	15.6879	13.84	18.1742	20.6288
AAEL005208	11.652	16.7216	11.7482	12.2905	13.1031	13.5676	11.4411	13.4165	12.1857	12.6527	16.9669	17.7356	16.0642	19.2583	17.5062	19.276	21.7278	20.6011	20.1683	20.4433	21.461	16.869	22.1474	19.8559	20.0833	12.9631	13.5275	13.5711	10.3806	12.6106	8.66492	11.5386	9.39569	12.4558	10.5138	11.8205	12.5472	10.2164	10.5618	11.2865	15.786	17.2402	18.7384	19.2452	17.7524	34.1062	27.7632	31.2424	29.1583
AAEL005202	1.54934	2.00898	1.56023	1.30046	1.60475	1.76415	1.16507	1.47258	1.62237	1.50604	2.21157	2.26191	2.23144	2.16345	2.21709	1.87362	1.06222	1.84139	2.1126	1.72246	1.97627	1.40505	1.12764	1.23402	1.43575	1.05004	1.57566	1.35687	0.915604	1.22454	1.3423	1.36905	0.996732	0.94266	1.16268	0.991504	1.07727	0.825622	1.30379	1.04955	1.81611	2.06997	2.45759	2.39695	2.18515	3.25715	3.56645	3.55408	3.96753
AAEL005206	0.625288	0.709563	0.467238	0.531102	0.583298	0.862236	0.737408	0.536148	0.452952	0.647186	0.395589	0.040631	0.224655	0.27204	0.233229	0.31055	0.052868	0.062157	0.181395	0.151743	0.073799	0.322288	0.079368	0.295721	0.192794	1.19601	1.72869	1.18772	1.33328	1.36143	1.4735	1.97266	2.76697	1.82064	2.00845	2.9421	4.0215	1.94959	1.9635	2.71917	5.49481	3.20983	4.35827	2.90777	3.99267	3.75684	3.10835	2.50152	1.86632
AAEL005186	0	0	0	0	0	0	0	0	0	0	0	0	0	0	0	0	0	0	0	0	0	0	0	0	0	0	0	0	0	0	0	0.037964	0.045639	0.040055	0.0309145	0	0	0.085251	0	0.0213127	0.019555	0.09995	0.058585	0.222908	0.100249	0.136167	0	0.008232	0
AAEL005187	5.5011	8.33559	5.12165	5.12506	6.02085	6.79537	5.47536	5.29216	4.82638	5.59732	5.62413	4.92096	4.74769	4.40572	4.92462	6.8708	4.51399	3.58395	4.74225	4.92775	5.80597	6.41897	5.03313	5.66941	5.73187	10.4063	11.1158	10.7255	10.1204	10.592	13.0887	13.4188	13.3009	10.6318	12.6101	14.3344	11.8489	13.5941	11.1007	12.7195	23.1027	22.4135	22.7765	24.8257	23.2796	30.3573	31.7575	27.3471	20.6842
AAEL005177	46.6001	43.1182	37.1318	38.5568	41.3517	50.1157	35.9352	39.3411	39.3276	41.1799	13.0539	11.9161	12.1615	11.1157	12.0618	14.403	10.2603	4.19013	9.21053	9.516	18.6603	19.5803	15.505	25.4467	19.798	49.1507	40.3393	43.4453	44.4048	44.335	77.8875	50.6085	68.8124	62.265	64.8934	83.1984	51.2152	66.1321	59.8672	65.1032	84.9217	86.1048	88.5241	81.7881	85.3347	83.1578	77.5589	77.0293	61.4839
AAEL005185	50.465	62.3785	46.5293	48.4277	51.9501	59.3001	46.3544	45.3821	49.8105	50.2118	17.9584	16.1874	15.9701	16.5525	16.6671	14.5725	14.0099	12.4713	13.6227	13.6691	19.0088	23.4991	20.4519	31.849	23.7022	53.5974	49.786	53.0678	51.2939	51.9363	76.127	67.7203	80.007	71.9577	73.953	97.553	73.9257	88.6281	87.7389	86.9614	110.204	111.128	117.046	127.761	116.535	121.929	113.034	123.281	92.6168
AAEL005213	231.422	245.239	223.065	257.559	239.321	228.54	208.953	218.38	230.854	221.682	192.469	209.411	268.111	191.079	215.268	206.175	167.946	158.939	153.882	171.735	188.093	158.302	195.704	214.065	189.041	183.338	188.308	202.222	168.684	185.638	156.541	138.419	164.668	149.131	152.19	165.45	141.672	182.589	174.987	166.174	243.956	223.343	301.716	284.178	263.298	381.33	280.653	461.163	290.392
AAEL005197	9.14715	10.1937	7.86811	7.63042	8.70984	9.06249	6.91446	8.82915	8.73602	8.38553	7.33268	6.27965	7.24717	6.27509	6.78365	9.68407	9.01597	9.0038	9.32443	9.25707	10.7176	8.52903	10.0341	12.0792	10.34	12.44	10.2231	13.3392	10.1867	11.5472	15.8281	11.1734	13.9018	15.206	14.0273	14.5968	12.0015	16.6503	13.5526	14.2003	20.2679	19.8402	19.3995	20.8514	20.0897	26.7169	17.0794	23.4661	17.3497
AAEL005175	7.38159	7.62254	5.72133	6.47152	6.79925	8.04163	7.12805	4.78795	7.43963	6.84932	1.89395	1.81534	2.61533	2.55451	2.21978	5.05126	5.72846	2.62069	4.40602	4.45161	8.86499	7.49477	7.87254	13.5562	9.44713	23.4982	20.4359	27.734	24.9775	24.1614	25.4676	17.3737	21.921	21.6227	21.5963	31.8563	22.9916	30.7899	28.9521	28.6474	45.5008	35.5253	45.4562	38.6195	41.2754	47.0597	35.6735	39.6468	24.8857
AAEL005191	5.37735	7.1569	6.6552	5.70049	6.22248	6.00068	5.8956	7.05323	6.55033	6.37496	11.9542	13.3609	11.6058	15.5867	13.1269	14.159	15.3421	16.3758	12.5664	14.6108	9.89959	11.1777	10.1762	8.14584	9.84984	3.98729	8.04784	4.82676	4.65641	5.37957	3.04271	5.06943	3.34113	5.28749	4.18519	5.6041	5.68773	4.76237	4.06685	5.03026	5.09493	7.05425	6.88596	5.92516	6.24008	12.7429	12.4997	13.9463	18.9465
AAEL005190	21.1658	38.8006	24.9812	27.88	28.2069	36.7622	28.2452	27.2284	20.6312	28.2168	67.0123	82.0379	85.298	65.503	74.9628	68.6451	68.7583	104.944	79.0327	80.345	72.2902	82.7102	96.8204	75.9413	81.9405	47.4592	64.0562	68.8443	43.4797	55.9599	16.3619	38.8521	17.475	23.6329	24.0805	18.1197	31.0848	22.3794	19.7807	22.8412	26.1203	31.3156	28.4059	35.5578	30.3499	78.5865	66.1176	64.1497	87.9247
AAEL005180	6.99748	7.24533	5.31851	6.13654	6.42446	7.40888	6.60324	5.07344	6.04422	6.28245	10.8324	9.5738	9.50498	11.5451	10.3641	11.7707	13.2469	9.60501	9.2961	10.9797	12.8756	9.57848	9.2553	8.9797	10.1723	5.6658	5.23816	4.32313	4.28375	4.87771	5.54394	5.20692	4.6675	5.32502	5.18585	7.04761	4.68665	5.05499	4.56239	5.33791	9.14997	6.70501	9.66859	8.30988	8.45836	12.746	8.51171	8.57088	8.84518
AAEL018333	0.693095	0.780102	0.54147	0.454599	0.617317	0.15039	0.089165	0.194284	0.063989	0.124457	0.265192	0.151471	0.080674	0.141722	0.159765	0.285446	0.216834	0.182644	0.412553	0.274369	0.093701	0.38751	0.296382	0.113866	0.222865	0.438387	0.563363	0.168818	0.773472	0.48601	0.110597	0.645414	0.512621	0.624875	0.473377	0.397225	0.484378	0.141572	0.353773	0.344237	1.51805	1.11688	1.4544	1.94371	1.50826	0.974147	1.08854	0.659183	0.884914
AAEL005201	7.42619	9.85787	8.53027	7.19866	8.25325	8.82733	8.75477	8.38398	9.51385	8.86998	18.8694	17.4917	16.6609	20.9872	18.5023	25.6529	29.4336	24.0457	28.226	26.8396	24.2202	22.2818	29.1193	26.343	25.4911	12.7403	14.2223	15.1766	11.2511	13.3476	17.5592	13.3596	16.5908	18.6776	16.5468	13.7511	10.6588	13.1867	15.74	13.3342	7.97306	11.2667	7.20582	10.5466	9.24804	14.4665	12.6904	16.8109	18.0133
AAEL005188	2.20831	1.89627	2.94424	6.489	3.38446	3.95614	2.18045	2.57984	4.95485	3.41782	15.5511	13.8107	4.37195	20.5364	13.5675	129.798	102.187	84.5507	248.276	141.203	226.824	247.241	186.16	452.648	278.218	424.608	307.031	513.184	632.983	469.452	583.622	569.042	511.744	594.964	564.843	482.558	439.008	512.711	554.099	497.094	144.819	389.305	82.9459	95.928	178.249	1.4149	18.5648	11.8447	6.32738
AAEL022497	146.663	141.859	145.459	161.842	148.956	156.857	150.929	142.477	151.3	150.391	209.356	190.493	199.747	231.602	207.799	278.965	285.061	259.191	278.973	275.548	353.704	291.797	346.351	390.246	345.525	241.594	254.478	286.671	240.76	255.876	120.774	167.824	106.246	114.14	127.246	67.6481	100.154	89.5758	68.1024	81.3702	58.981	72.8261	59.7316	84.4942	69.0082	77.5168	76.5659	78.1583	95.0714
AAEL005203	3.3674	14.6134	3.78087	3.72148	6.37078	8.45731	5.00343	3.20092	3.21953	4.9703	3.63171	6.14626	4.55436	6.50167	5.2085	6.26229	6.79128	5.78311	4.89315	5.93246	5.04386	13.5104	6.37598	5.13887	7.51728	7.49856	19.2881	7.92505	7.67537	10.5968	12.1704	22.5587	14.8205	16.3178	16.4668	22.3226	30.3471	16.794	17.7703	21.8085	40.545	54.1758	54.2981	65.3655	53.5961	78.5502	94.8008	58.7306	91.9324
AAEL021180	0.215196	0.650772	0.301282	0.348436	0.378922	0.339834	0.506493	0.329056	0.123974	0.324839	0.480876	0.113291	0.043633	0.111128	0.187232	0.153206	0.382768	0	0.283823	0.204949	0.118051	0.458092	0.171622	0.27651	0.256069	0.324835	0.474284	0.278197	0.394115	0.367858	0.81362	0.676124	0.65497	0.164679	0.577348	0.423937	0.687137	0.921581	0.503695	0.634088	1.36271	1.89213	1.56178	2.18007	1.74917	1.51689	3.62626	2.24284	2.06191
AAEL005174	52.386	41.5955	51.4903	51.1799	49.1629	47.7145	44.6688	49.2169	47.0378	47.1595	29.3524	21.0513	21.8713	21.0736	23.3372	17.7175	17.6446	10.1466	14.4117	14.9801	20.9892	22.5552	16.4165	13.4228	18.3459	17.3986	20.6544	18.378	17.6654	18.5241	29.4476	28.5714	27.7329	27.045	28.1992	21.1723	23.7611	20.6382	26.2603	22.958	24.9796	29.0268	23.1931	27.9053	26.2762	27.5862	28.142	28.8334	32.7518
AAEL005204	3.6237	2.21308	2.50757	3.02712	2.84287	3.48366	3.27233	3.41093	3.16163	3.33214	2.49063	1.16531	1.02473	2.58082	1.81537	9.5125	9.07452	3.66688	8.7077	7.7404	13.1744	8.66565	11.4537	13.231	11.6312	16.9199	16.9577	18.9515	17.3888	17.5545	13.4236	9.64333	9.69381	10.6282	10.8472	12.3995	6.82795	10.4849	11.1734	10.2215	14.5625	10.0674	11.336	12.5636	12.1324	10.0482	10.3065	8.08836	8.2532
AAEL022684	0.093836	0.302718	0.036636	0	0.108297	0.080324	0.092252	0.082151	0.059633	0.07859	0.074426	0.079468	0.054598	0.055746	0.0660595	0.063105	0.172505	0.090607	0.04163	0.0919617	0.096489	0.303415	0.03895	0.068964	0.126954	0.0641	0.087498	0	0.220788	0.0930965	0.08359	0.416322	0.056314	0.036673	0.148225	0.063045	0.174853	0.060708	0.240074	0.13467	0.115395	0.116493	0.137275	0.345968	0.178783	0.081533	0.166124	0.194407	0.208779
AAEL027409	0	0.020428	0.072097	0	0.0231312	0.050873	0	0	0	0.0127183	0	0	0	0	0	0	0	0	0	0	0	0	0	0	0	0	0	0	0	0	0.047426	0	0	0	0.0118565	0	0	0	0.014666	0.0036665	0	0	0	0	0	0.103564	0	0	0.04215
AAEL026248	0.120065	0.311764	0	0	0.107957	0	0.594517	0.328519	0.134962	0.264499	1.06265	0.404342	0	0.482679	0.487419	0.241784	0.635769	0.565288	0.936475	0.594829	0.644881	0.501532	0.843853	0.503737	0.623501	0.240962	0.14163	0.689875	0.840636	0.478276	0.094569	0.404053	0.117913	0	0.154134	0.46623	0.822943	0.476308	0.151457	0.479234	0.427525	0.516236	0.943576	0.995914	0.720813	1.27656	0.613212	0.979759	0
AAEL002855	0.188818	0.20601	0.236966	0.135798	0.191898	0	0	0.125368	0.060174	0.0463855	0.050857	0.018184	0	0	0.0172602	0.326278	0	0.012814	0.046723	0.0964538	0.307169	0.118768	0.246793	0.075697	0.187107	0.337616	0.466961	0.457282	0.271607	0.383366	0.912912	0.757986	0.831706	0.633052	0.783914	0.762664	0.551203	0.697915	0.65987	0.667913	0.754826	0.597024	0.584854	0.21208	0.537196	0.121077	0.2557	0.441436	0.144614
AAEL024223	0	0.07798	0.017654	0.035461	0.0327737	0	0	0	0	0	0.02773	0	0	0.065566	0.023324	0	0.021264	0	0	0.005316	0.013906	0.040252	0.047059	0.029612	0.0327073	0.091816	0.129056	0.00523	0.079035	0.0762842	0.176366	0.234152	0.123362	0.161078	0.173739	0.157309	0.18797	0.236175	0.19724	0.194673	0.045297	0.097838	0.022528	0.073309	0.059743	0	0.024462	0.017773	0.016903
AAEL005179	218.149	243.392	199.344	208.068	217.238	230.225	218.594	189.903	204.661	210.846	153.795	168.688	144.114	149.386	153.996	138.155	141.672	132.21	125.459	134.374	117.439	133.321	124.596	104.676	120.008	80.6077	113.479	97.2576	81.0717	93.104	145.052	149.878	154.627	146.662	149.055	127.504	157.539	172.443	147.171	151.164	120.308	159.729	136.483	113.963	132.621	175.315	179.527	261.389	263.431
AAEL005200	1.30329	0.930045	1.74292	1.73948	1.42893	1.62575	1.22318	2.06845	1.51125	1.60716	0.999491	0.415125	1.31936	0.768122	0.875525	0.702353	0.827997	0.441916	0.764145	0.684103	1.8411	0.990221	2.22148	1.06581	1.52965	1.41941	1.77102	1.78164	0.762619	1.43367	0.717098	1.07569	0.77905	0.424467	0.749076	0.887193	1.0078	0.488214	1.74911	1.03308	1.02836	1.05176	0.987852	0.75568	0.955912	0.963959	1.27381	1.31303	1.90004
AAEL005199	0.184098	0.087359	0.089897	0.132518	0.123468	0	0	0	0.033029	0.00825725	0	0	0	0	0	0	0	0	0.033296	0.008324	0	0	0	0.069162	0.0172905	0.092917	0.044738	0.152251	0.144161	0.108517	0	0.119833	0.070126	0.097618	0.0718942	0	0.112296	0	0	0.028074	0.021692	0.137382	0	0.269638	0.107178	0	0	0	0
AAEL027175	1.63226	1.73589	1.86477	1.83708	1.7675	2.34246	1.68768	1.50709	1.86218	1.84986	1.4608	1.22816	1.39228	1.43258	1.37846	1.44704	1.39245	1.18216	1.32398	1.33641	1.52533	1.62493	1.41053	1.07624	1.40926	1.29236	1.52724	1.36212	1.33593	1.37941	1.49233	1.78599	1.41917	1.3569	1.5136	1.88552	1.95526	1.57287	1.56947	1.74578	3.30388	2.74169	3.20141	2.7822	3.0073	6.48831	4.69051	4.26267	4.34049
AAEL008683	10.864	13.4289	8.82141	9.66369	10.6945	10.4053	9.89265	7.46535	9.05185	9.2038	7.53446	9.05943	8.20508	7.94837	8.18683	5.44056	7.26979	3.78532	4.87412	5.34245	6.00919	10.0807	4.917	6.1249	6.78296	6.08334	15.7917	5.88541	6.15967	8.48003	7.84761	10.804	6.9816	7.55089	8.29603	8.34585	13.4515	8.37964	7.65799	9.45875	11.652	21.7625	10.9393	15.8662	15.055	16.3449	36.3518	16.0224	25.8119
AAEL008681	0	0.034246	0	0	0.0085615	0	0	0	0	0	0	0	0	0	0	0	0.044304	0	0	0.011076	0	0	0	0	0	0	0	0	0	0	0	0	0	0	0	0	0	0	0	0	0.039066	0	0.048376	0	0.0218605	0	0	0	0
AAEL008684	0.692387	0.440575	0.565697	0.797345	0.624001	0.226207	0.385473	0.29555	0.428198	0.333857	0.212712	0.379441	0.317324	0.358784	0.317065	0.417065	0.381284	0.338829	0.555722	0.423225	0.379474	0.266305	0.29513	0.33353	0.31861	0.271184	0.208506	0.334386	0.493894	0.326993	0.376183	0.447192	0.224279	0.271151	0.329701	0.608832	0.465746	0.239098	0.497861	0.452884	0.820495	0.737805	0.955293	0.887324	0.850229	1.15897	0.84814	0.87842	0.90403
AAEL008679	20.1582	21.9927	20.4726	24.4022	21.7564	22.2676	25.6649	23.3106	26.4838	24.4317	3.19001	3.97616	4.80887	3.38398	3.83976	6.16483	7.10693	3.75665	6.49609	5.88112	11.0132	11.6591	10.0351	14.7549	11.8656	16.3326	18.8432	15.0048	17.6878	16.9671	9.12796	16.9352	11.1033	13.1912	12.5894	12.8569	16.3456	17.0648	15.9598	15.5567	26.7849	16.9218	29.2029	29.3417	25.5628	42.2749	30.7804	41.4154	40.7398
AAEL020915	3.50758	3.60485	2.79591	3.53418	3.36063	3.90339	3.71521	2.08615	2.63449	3.08481	1.17455	0.878108	1.00684	0.822809	0.970576	1.85568	1.72609	0.686862	1.18443	1.36327	1.18059	1.98302	1.43287	1.8361	1.60815	2.12244	2.88735	2.35518	3.00425	2.59231	3.47033	3.14298	3.28903	2.92538	3.20693	3.91466	4.02479	3.57718	4.58829	4.02623	7.0302	6.60114	6.04879	7.52041	6.80014	8.56792	7.74389	6.67443	7.58738
AAEL018954	0	0	0	0	0	0	0	0	0	0	0	0	0	0	0	0	0	0	0	0	0	0	0	0	0	0.010653	0	0	0	0.00266325	0	0	0	0	0	0	0	0	0	0	0	0	0	0	0	0	0	0	0
AAEL008676	9.36973	10.3498	9.27549	8.24239	9.30935	10.5477	9.66865	9.69541	9.98692	9.97468	12.8029	16.0126	14.2108	15.1774	14.551	21.3084	20.2793	21.3249	19.2463	20.5397	16.1852	22.3726	20.746	14.3833	18.4218	6.55708	11.0139	7.45273	6.18387	7.8019	3.12907	6.44773	3.76981	3.40337	4.18749	3.5126	5.64803	3.70912	3.37078	4.06013	7.63198	7.65372	9.061	10.9921	8.8347	27.2345	23.4116	27.6677	38.6096
AAEL008674	53.9328	76.689	52.866	55.5953	59.7708	68.6379	71.7364	58.4958	59.7631	64.6583	68.3427	75.0859	60.0113	74.5293	69.4923	84.7079	96.9075	82.7894	99.5709	90.9939	100.183	127.406	112.167	131.393	117.787	127.403	138.382	145.197	147.277	139.565	132.207	157.14	154.653	158.102	150.525	128.472	148.086	139.531	126.565	135.664	133.669	134.987	143.123	158.436	142.554	143.598	143.061	134.752	135.393
AAEL008680	13.5213	19.381	15.7048	18.8084	16.8539	19.3015	18.22	20.3293	16.4044	18.5638	20.4944	19.6153	18.5662	21.0055	19.9204	24.5613	27.048	35.0931	33.2238	29.9816	25.6893	27.6412	35.8335	24.2384	28.3506	10.169	17.7866	13.7452	10.6585	13.0898	10.5562	11.0858	11.2398	11.2944	11.0441	9.56282	13.7897	10.2082	12.4651	11.5065	21.3633	18.9388	22.4665	24.1507	21.7298	43.7159	30.5122	35.4961	38.7669
AAEL021875	0.088689	0.043016	0.021393	0.00748	0.0401445	0.061978	0.039771	0.033983	0.018684	0.038604	0.058804	0.016237	0.031722	0.03536	0.0355307	0.058902	0.018569	0.026539	0.004928	0.0272345	0.012039	0.027831	0.01561	0	0.01387	0.061092	0.007581	0.012344	0.026285	0.0268255	0.097145	0	0.013341	0.031949	0.0356088	0.025171	0.030144	0.007351	0.028665	0.0228327	0.001669	0.014214	0.042898	0	0.0146952	0.13803	0.011817	0.054778	0.02522
AAEL019300	0	0	0	0	0	0	0	0	0	0	0	0	0	0	0	0	0	0	0	0	0	0	0	0	0	0	0	0	0	0	0	0	0	0	0	0	0	0	0	0	0	0	0	0	0	0	0	0	0
AAEL019299	0	0	0	0	0	0.341367	0	0.162168	0	0.125884	0	0	0	0.299378	0.0748445	0	0	0	0	0	0	0	0	0	0	0	0	0.436706	0	0.109176	0	0	0	0	0	0	0	0	0	0	0	0	0	0	0	0	0	0	0.696057
AAEL009082	5.608	7.53881	4.9339	4.92041	5.75028	6.65523	5.82728	4.37557	5.9251	5.6958	5.69214	6.18569	5.13471	5.45587	5.6171	7.05199	6.12815	5.44651	5.4271	6.01343	6.72536	8.81424	5.70557	5.95487	6.80001	8.49032	9.05299	7.44889	7.15763	8.03746	11.429	10.3617	10.1902	9.76871	10.4374	12.2196	12.335	11.0382	12.2309	11.9559	15.2039	17.2606	14.8481	17.1668	16.1199	19.148	22.3806	18.8276	17.1717
AAEL018169	0.602329	0.381372	0.609089	0.499576	0.523092	0.262768	0.618116	0.283211	0.64457	0.452166	0.069977	0.233238	0.299402	0.365646	0.242066	0.267779	0.695103	0.392428	0.630306	0.496404	0.417485	0.700075	0.424588	0.71612	0.564567	0.46265	0.472619	0.505315	0.492938	0.48338	1.07776	0.621265	0.936823	0.805578	0.860357	0.785885	0.996976	0.63113	0.816532	0.807631	1.14942	0.920753	1.42242	1.31452	1.20178	1.64678	1.35002	1.63173	1.62793
AAEL028181	0	0.057451	0	0	0.0143628	0	0	0	0.128056	0.032014	0	0	0.097355	0	0.0243387	0	0.052412	0	0	0.013103	0	0	0.015267	0	0.00381675	0	0	0.026388	0	0.006597	0	0.035545	0.075791	0.038478	0.0374535	0	0.052261	0	0.134123	0.046596	0.159595	0.23155	0.056089	0	0.111809	0.098871	0	0.043768	0.063658
AAEL009075	1.09144	2.10182	1.784	1.57317	1.63761	1.72266	1.07977	1.33436	1.13014	1.31673	0.601783	0.944868	0.796818	0.93321	0.81917	1.19579	0.601911	0.555609	1.37585	0.932292	1.34939	1.76122	1.06435	1.20706	1.3455	2.11245	1.58055	1.15023	2.16831	1.75288	2.09618	2.34943	2.14135	2.41167	2.24966	2.30811	3.31735	2.78806	2.39944	2.70324	3.57915	4.62986	3.21059	3.90161	3.8303	6.12292	4.91479	4.90416	4.39767
AAEL009086	0.839455	0.867875	0.469166	0.838217	0.753678	0.883788	1.04256	1.80877	0.543845	1.06974	1.58649	1.342	1.83386	2.03739	1.69994	0.736612	1.454	1.07525	1.5682	1.20851	1.50201	0.591346	0.975463	0.50482	0.89341	1.07563	0.814996	1.20578	1.48718	1.1459	0.549789	0.874291	0.280304	0.433412	0.534449	0.225659	0.585237	0.639952	0.663264	0.528528	0.927144	1.05486	0.474288	0.785561	0.810463	0.209708	0.418783	1.06927	0
AAEL009088	36.4308	47.032	32.2056	35.8307	37.8748	43.0242	35.3201	35.5822	36.5964	37.6307	30.7752	29.0533	37.106	29.8692	31.7009	29.5849	24.8323	19.1814	20.9306	23.6323	25.0483	24.7825	22.3838	23.1801	23.8487	29.2179	31.6889	23.5447	26.0621	27.6284	49.8271	41.9181	41.1629	40.7813	43.4224	57.0266	45.6394	49.4965	54.6546	51.7043	86.8004	70.7124	83.5058	87.6153	82.1585	93.8968	82.0747	68.2821	71.3899
AAEL009077	0.101583	0.126449	0.087444	0.056423	0.0929747	0.134028	0.037241	0.190278	0.052664	0.103553	0.035298	0	0.102148	0.081286	0.054683	0.030369	0	0.033192	0.09092	0.0386203	0.034632	0.064046	0.231367	0.097846	0.106973	0.097684	0.215311	0.032956	0.150171	0.124031	0.250496	0.112192	0.078602	0.122042	0.140833	0.033418	0.04114	0.105202	0.102047	0.0704517	0.144324	0.079136	0.108989	0	0.0831122	0.440854	0.116769	0.020092	0.163796
AAEL009080	56.4345	61.898	49.4458	54.464	55.5606	60.2694	55.173	51.3032	55.7768	55.6306	57.6926	66.0897	67.856	65.7511	64.3474	62.3642	65.7039	47.6406	46.9238	55.6582	40.9439	57.398	45.7959	27.8397	42.9944	25.5767	49.4954	23.2609	17.0814	28.8536	16.0269	26.4134	16.0798	15.6441	18.5411	16.465	28.323	15.2034	14.3523	18.5859	26.273	34.093	30.6429	40.6259	32.9087	105.864	104.65	100.168	131.986
AAEL009085	26.8345	36.5567	22.6754	24.4618	27.6321	36.891	31.0488	40.4229	35.9473	36.0775	16.3609	15.6543	16.2435	17.2619	16.3802	18.6218	17.1952	12.15	15.1309	15.7745	17.6016	26.7981	17.9208	22.3674	21.172	31.0856	35.2114	29.1859	29.2902	31.1933	34.4357	32.8368	31.5044	31.0375	32.4536	41.5872	41.6704	43.6341	42.7495	42.4103	60.1821	55.0642	61.8935	60.0142	59.2885	68.2283	69.5073	55.0568	52.0162
AAEL009078	108.103	137.076	120.496	113.087	119.691	132.998	125.048	112.767	116.687	121.875	108.269	122.602	117.585	119.459	116.979	121.876	128.545	137.957	132.636	130.253	149.542	167.585	176.065	161.541	163.683	157.256	191.817	194.032	174.348	179.363	112.091	161.886	108.363	101.046	120.846	72.7516	116.698	96.163	72.4496	89.5155	103.393	100.378	116.243	122.791	110.701	235.179	204.94	224.301	275.321
AAEL009089	5.11511	6.04206	4.90777	4.14045	5.05135	4.5011	3.9294	4.86456	6.03835	4.83335	4.41969	4.0793	4.11202	2.5686	3.7949	4.00546	5.25895	4.51251	4.37342	4.53759	3.76145	3.64658	3.87563	6.56641	4.46252	5.02558	3.71542	5.29247	5.62304	4.91413	9.52304	7.07047	9.001	7.41215	8.25166	9.99328	9.03233	11.2672	10.3919	10.1712	13.5501	11.3106	13.9969	16.5419	13.8499	17.9017	17.7613	17.2685	15.319
AAEL009084	9.36501	12.5478	11.4414	8.81724	10.5429	11.7834	9.75292	11.7413	12.0727	11.3376	13.5432	14.2279	15.4209	15.7045	14.7241	11.5607	9.97685	14.3111	8.06934	10.9795	7.14651	10.0554	7.03804	4.13541	7.09384	3.6951	6.84644	3.00848	1.95359	3.8759	2.63303	3.94498	2.43125	2.60977	2.90476	2.89657	4.20136	3.06234	2.53266	3.17323	7.53222	5.7072	7.93387	9.60893	7.69555	34.1481	20.4275	33.0592	36.4923
AAEL009074	337.437	560.522	298.309	315.713	377.995	517.085	521.646	656.947	543.446	559.781	350.872	392.771	469.513	346.361	389.879	224.499	206.526	170.701	146.269	186.999	164.018	385.999	155.308	138.526	210.963	149.405	281.229	114.096	131.744	169.119	186.503	242.719	197.709	178.915	201.461	249.443	318.653	241	238.337	261.858	605.468	553.757	694.238	755.104	652.142	1161.52	1066.86	1056.08	1040.89
AAEL027276	0	0.173351	0	0	0.0433378	0	0.046209	0	0	0.0115523	0	0	0	0	0	0	0	0	0	0	0	0	0	0	0	0.06625	0	0	0	0.0165625	0	0	0	0.035173	0.00879325	0	0	0.18715	0	0.0467875	0.020772	0	0	0	0.005193	0	0.055117	0	0
AAEL010678	0	0	0.188453	0.11771	0.0765408	0.094672	0	0	0.197241	0.0729782	0	0.465133	0	0.045852	0.127746	0.678392	0.864778	0.191335	0.773614	0.62703	1.63813	2.62833	1.43407	4.03494	2.43387	4.74614	7.50225	7.8427	7.84585	6.98424	6.03715	4.79653	4.86904	5.11296	5.20392	2.11934	4.4804	3.67232	3.71114	3.4958	0.842692	2.28884	0.533799	0.503091	1.04211	0.758374	0.980799	0.351286	0.844533
AAEL010653	2.78423	2.69941	2.98212	4.81556	3.32033	2.18706	3.70411	2.54302	3.48767	2.98046	2.05424	1.91725	1.49505	6.4871	2.98841	47.7644	105.456	38.8302	112.725	76.1939	204.619	177.734	223.256	596.747	300.589	1335.61	1077.47	1212.45	1620	1311.38	1517.49	1606.47	1978.9	1862.67	1741.38	1160.38	1317.3	1584.73	1430	1373.1	273.572	534.032	127.519	204.189	284.828	23.5894	59.4839	82.467	32.2065
AAEL011492	0.172035	0.591037	0.615144	0.355477	0.433423	0.372594	0	0.278658	0.318578	0.242457	0.364126	0.126713	0.020789	0.345046	0.214168	0.270779	0.255825	0.156691	0.231781	0.228769	0.109306	0.064578	0	0.190069	0.0909882	0.230482	0.260353	0.366383	0.262616	0.279958	0.359009	0.486713	0.311425	0.314324	0.367868	0.376933	0.195694	0.214505	0.349047	0.284045	0.940087	0.504031	0.917105	1.2974	0.914655	0.589627	0.483386	0.341799	0.659146
AAEL027317	0.013299	0	0	0	0.00332475	0	0	0	0	0	0	0	0	0	0	0	0.014112	0	0	0.003528	0	0	0	0	0	0	0	0	0	0	0	0	0	0	0	0	0	0	0	0	0.036792	0.033117	0.045611	0.580626	0.174036	0	0	0	0
AAEL019416	1.88541	1.52164	1.62066	1.87306	1.72519	1.82543	1.52812	1.99919	1.98779	1.83513	0.299456	0.252647	0.281441	0.29562	0.282291	0.46179	0.350303	0.321797	0.357487	0.372844	0.658037	0.709897	0.352441	0.825629	0.636501	0.732147	0.926273	0.986427	0.937973	0.895705	2.03755	1.21114	1.58221	1.56345	1.59859	2.94088	1.48754	2.71455	2.6143	2.43932	3.63381	3.08637	4.00323	4.08296	3.70159	4.72453	3.40251	3.93403	4.05478
AAEL008195	31.3624	35.7157	37.0264	37.5956	35.425	33.3868	30.5561	32.0082	36.6377	33.1472	23.3792	22.0434	20.0269	23.9164	22.3414	22.0175	22.4403	23.3499	22.8569	22.6662	24.087	26.5165	27.5807	28.5234	26.6769	27.2848	29.3534	27.0081	26.076	27.4306	34.1808	30.2058	34.5287	28.259	31.7936	39.1069	32.6177	36.4771	35.167	35.8422	56.8739	44.4378	61.6932	49.2768	53.0704	72.4186	58.508	67.6932	56.1972
AAEL008216	70.5654	78.2224	63.3798	67.3271	69.8737	79.0817	68.5136	57.8321	68.7137	68.5353	54.4058	62.932	47.9565	72.4816	59.444	112.743	125.369	84.3384	114.822	109.318	173.082	141.197	161.555	202.672	169.626	178.596	175.278	197.868	170.426	180.542	100.172	113.667	97.2329	101.456	103.132	84.3538	103.319	88.2464	82.0366	89.4889	107.755	112.821	115.433	127.904	115.978	108.441	141.958	114.164	108.93
AAEL008210	13.7859	20.9427	13.4087	15.7683	15.9764	19.2176	18.287	45.232	22.5348	26.3178	11.264	10.4405	10.9564	10.7558	10.8542	11.298	8.87709	6.88682	7.26358	8.58136	10.9767	16.3816	9.43295	9.26795	11.5148	8.11566	16.2474	9.36765	7.90285	10.4084	13.6806	14.2285	10.5288	11.2581	12.424	20.3117	15.1862	14.1442	14.4474	16.0224	22.0167	20.3255	20.0176	22.4093	21.1923	30.4382	31.696	31.2117	31.0874
AAEL027949	14.6426	16.4979	12.1789	13.6056	14.2312	16.3462	12.6987	13.8692	13.3923	14.0766	10.6843	9.71408	9.96283	7.64439	9.50141	11.3417	10.4656	5.82272	8.34827	8.99458	16.7776	15.0938	17.0175	19.2212	17.0275	23.0052	22.3022	21.4469	21.1631	21.9794	28.079	21.1861	21.9872	24.0007	23.8132	32.9625	23.7265	26.4274	30.3925	28.3773	50.6884	38.3089	48.5539	54.382	47.9833	48.1687	43.9535	41.1416	37.7321
AAEL008213	7.42843	10.7136	8.19432	6.02357	8.08997	8.3894	7.96394	6.96356	8.21598	7.88322	5.59253	4.48931	5.22205	5.71682	5.25518	4.76441	3.50721	4.25422	3.84335	4.09229	6.08972	4.08299	7.59114	6.20792	5.99294	5.89957	5.80672	4.99133	5.46868	5.54157	4.44131	5.23156	3.57098	4.097	4.33521	3.43015	4.74249	3.45299	2.9721	3.64943	4.64919	6.33842	5.01188	6.3056	5.57627	8.17923	7.75549	8.40069	7.92413
AAEL008211	6.95219	8.0511	8.61351	5.89667	7.37837	10.7435	10.1763	11.3673	12.2236	11.1277	11.0439	12.3621	8.12462	12.424	10.9887	25.8848	26.8773	24.9315	30.1356	26.9573	35.6845	27.3734	38.3175	32.2389	33.4036	14.7645	20.8768	19.6117	15.245	17.6245	10.0144	10.0901	10.8135	9.6511	10.1422	9.25775	14.2	8.6288	9.4405	10.3818	17.6755	21.8825	17.5835	21.4223	19.6409	20.0463	26.4038	21.1683	23.7064
AAEL008220	18.0124	23.4622	17.295	17.9673	19.1842	19.1098	19.5331	22.5649	18.1506	19.8396	28.0414	32.0276	37.9025	34.7573	33.1822	29.6358	32.7261	39.011	27.8139	32.2967	16.978	24.7718	19.0634	9.44019	17.5634	5.33774	16.8864	6.21522	3.42722	7.96664	2.48191	8.64255	2.08443	3.67723	4.22153	3.22359	8.74361	3.75723	3.73065	4.86377	9.96109	9.75922	12.5752	17.5484	12.461	66.2483	53.7766	78.0365	82.005
AAEL017462	14.6641	15.4223	12.5489	13.4466	14.0205	16.8125	12.5465	15.888	15.5084	15.1888	74.5585	80.16	98.7636	74.6865	82.0421	34.1184	34.8593	27.5181	21.1398	29.4089	20.4817	21.5207	17.851	18.3993	19.5632	16.3954	15.7679	12.4725	12.1221	14.1895	14.7523	14.8847	11.4289	11.7025	13.1921	13.6318	14.812	14.4109	11.8314	13.6715	21.4931	20.6007	18.7534	20.5237	20.3427	24.4552	20.8607	19.2757	21.7864
AAEL008202	0.036046	0.314914	0.033889	0.119115	0.125991	0	0	0.095626	0.123301	0.0547317	0	0	0.053791	0.098283	0.0380185	0.086697	0.128225	0	0.194265	0.102297	0	0	0.0651	0.050359	0.0288648	0.033528	0.141631	0	0.262531	0.109423	0.15821	0.480579	0.259472	0.33933	0.309398	0.114482	0.215265	0.060369	0.303379	0.173374	0.81303	0.784283	0.949678	0.938207	0.8713	0.273121	0	0.082721	0.272499
AAEL015593	36.633	35.3768	27.662	30.8693	32.6353	40.3794	29.2471	39.6189	30.1048	34.8376	64.895	78.6339	75.2504	78.6047	74.346	54.0031	50.9609	26.5099	39.3717	42.7114	46.705	48.6702	49.7335	44.1515	47.3151	87.7061	93.863	80.0597	101.183	90.7029	139.657	129.875	129.568	134.385	133.371	138.378	126.17	117.606	141.54	130.924	145.954	145.146	131.932	172.859	148.973	106.756	114.791	91.7143	88.7027
AAEL026138	0.128098	0.019075	0	0.18832	0.0838732	0.460305	0.163454	0.38791	0.150199	0.290467	0.149576	0.222773	0.305654	0.256311	0.233578	0.364825	0.0887	0.048744	0	0.125567	0.150352	0.281531	0.304976	0.204882	0.235435	0.179375	0.653742	0.366242	0.18729	0.346662	0.615226	0.232791	0.399739	0.871742	0.529875	0.22044	0.443839	0.512764	0.150179	0.331805	0.491179	0.14234	0.237299	0.125839	0.249164	0.291334	0.057738	0.108178	0.116499
AAEL022593	1.25273	0.912103	0.927145	0.775886	0.966966	1.91834	1.50648	1.86905	1.39344	1.67183	0.486376	0.547762	0.427979	0.759093	0.555303	2.01748	2.14652	1.66387	1.74039	1.89206	1.79087	2.19443	1.96131	1.87507	1.95542	1.61226	2.07482	1.59054	1.01874	1.57409	1.03582	0.840252	1.06646	0.741544	0.921019	0.873186	1.17562	1.25092	0.740314	1.01001	1.52774	1.07625	0.980817	1.37234	1.23929	2.45734	2.89484	1.68609	1.948
AAEL017029	1.40972	1.00975	0.837632	1.37149	1.15715	0.06114	0.494727	0.437297	0.791856	0.446255	0.08965	0.319377	0.379169	0.851432	0.409907	0.322974	0.16955	0.269073	0.553425	0.328755	0.02354	1.41813	0.601422	1.04483	0.77198	1.49295	2.20819	3.38912	2.61567	2.42648	0.712799	1.6736	0.595461	1.7761	1.18949	0.738056	0.804517	0.125405	0.317681	0.496415	3.54137	2.24146	2.89842	3.46896	3.03755	0.146608	0.322	0.492046	0.507768
AAEL005978	0.0233	0.018543	0	0.010343	0.0130465	0	0	0	0.010667	0.00266675	0.011422	0	0.009385	0	0.00520175	0	0.011868	0	0	0.002967	0	0	0	0	0	0	0	0	0.01155	0.0028875	0.052235	0	0	0	0.0130587	0.012251	0	0	0	0.00306275	0.042895	0.348744	0.032497	0.015343	0.10987	0	0.058319	0.026532	0.026219
AAEL026163	0.028166	0	0.026216	0.043759	0.0245353	0.041492	0.033008	0.06177	0.038683	0.0437382	0.062572	0	0.022691	0.021672	0.0267338	0	0.058482	0	0.050261	0.0271858	0.015348	0	0.029402	0	0.0111875	0.028812	0	0	0.013962	0.0106935	0	0	0.011702	0.021832	0.0083835	0	0	0	0	0	0.038571	0.03507	0.015885	0.028196	0.0294305	0	0.017249	0.016105	0
AAEL015668	0	0	0	0.066751	0.0166878	0	0	0.022138	0.065536	0.0219185	0	0	0	0.020547	0.00513675	0	0	0	0	0	0	0	0	0.034753	0.00868825	0	0	0	0	0	0	0	0	0	0	0	0	0	0	0	0	0	0	0	0	0.032473	0.030538	0	0
AAEL005985	101.428	105.393	87.5991	102.525	99.2363	79.9425	60.0107	33.8777	48.8828	55.6784	46.7092	56.0109	77.9237	44.4688	56.2782	24.606	23.4476	17.2959	18.6095	20.9897	26.5279	29.3792	21.969	18.0009	23.9693	22.8876	26.2829	16.367	12.2746	19.453	20.1726	24.7541	17.1462	13.1753	18.812	13.6049	17.797	17.2658	11.7747	15.1106	48.9873	36.3009	50.7765	50.8609	46.7314	143.889	68.638	93.0991	86.2547
AAEL019436	0.04927	0.051297	0.161149	0.022508	0.071056	0.069733	0.029811	0	0.023214	0.0306895	0	0.125989	0.04085	0	0.0417097	0	0	0.077238	0.040273	0.0293778	0.081412	0.049976	0	0	0.032847	0.103827	0.077249	0.098623	0.070881	0.087645	0.135003	0.045903	0.062079	0.175928	0.104728	0	0.299559	0.042037	0.020805	0.0906002	0.220488	0.165838	0.057969	0.289486	0.183445	0.10173	0.031054	0	0.028769
AAEL019435	0.017674	0.071425	0.066245	0.062763	0.0545267	0	0.092687	0.015525	0.016183	0.0310988	0	0	0.014239	0.018132	0.00809275	0.016891	0	0	0.01577	0.00816525	0	0	0.018731	0	0.00468275	0	0.014126	0	0.035044	0.0122925	0	0.014284	0.013854	0	0.0070345	0.046466	0	0	0.04351	0.022494	0.032634	0.009756	0.020206	0.022805	0.0213503	0	0.043296	0.02028	0.020056
AAEL026846	7.56075	8.39096	6.17973	6.21357	7.08625	8.04904	6.23679	4.90487	6.60672	6.44936	3.45019	4.8266	4.15438	4.09741	4.13214	4.00027	4.37313	2.65601	3.95496	3.74609	4.60948	5.82865	4.57212	5.40837	5.10466	5.72821	7.53018	4.43516	6.01301	5.92664	6.06145	7.33486	5.6084	5.77697	6.19542	6.67411	6.59904	6.93225	6.91395	6.77984	10.3494	9.46936	10.7139	11.1357	10.4171	14.8942	16.3197	15.6652	17.2524
AAEL022022	1.24042	1.85983	0.738027	0.596674	1.10874	1.80207	1.70018	0.628829	1.30982	1.36022	0.513308	0.574267	0.792923	0.370128	0.562656	0.214616	0.604375	0	0.108506	0.231874	0.92774	0.959145	0	0.270466	0.539338	1.11982	1.17705	0.891762	0.491498	0.920031	0.386876	1.64985	0	0	0.509182	0.752396	0.504498	0.639301	1.32558	0.805445	1.68146	0.926195	0.962082	0.770488	1.08506	1.29238	3.31473	3.7134	2.58835
AAEL005972	1.5755	2.29419	1.09669	0.96763	1.4835	2.43928	2.04033	1.61319	1.84259	1.98385	8.7019	8.91659	8.71906	8.22476	8.64058	2.55223	1.85019	1.59616	2.02245	2.00526	1.17532	2.2225	0.694847	1.0308	1.28087	2.27894	3.91098	2.97757	2.29315	2.86516	4.92266	4.01668	4.6923	3.79132	4.35574	4.41308	4.28329	3.81787	3.64731	4.04039	5.14773	5.47924	4.29019	5.52695	5.11103	5.79221	7.53825	5.09743	4.78742
AAEL005977	11.6144	22.5493	8.46251	9.62632	13.0631	14.3702	12.8408	12.46	11.1188	12.6975	111.444	123.203	124.708	112.915	118.068	23.9642	27.1707	17.7243	13.2831	20.5356	7.70577	25.1408	6.50069	6.92271	11.5675	16.1467	33.095	14.9831	19.4077	20.9082	39.6174	30.906	32.1279	31.366	33.5043	35.6033	36.607	30.8469	27.3373	32.5986	48.8156	45.0955	47.309	45.8841	46.776	49.4774	51.4278	40.8579	36.291
AAEL005976	12.8227	19.202	13.8824	15.7293	15.4091	18.6529	17.3076	16.6695	15.2271	16.9643	25.5783	26.2789	25.785	25.9713	25.9034	23.8533	27.7073	29.363	25.9703	26.7235	29.1442	30.5371	32.4225	28.5212	30.1563	19.9874	26.836	23.7559	20.3042	22.7209	14.6686	19.2784	13.9348	15.1373	15.7548	15.7063	19.3547	15.8703	15.5343	16.6164	23.8316	23.4701	28.8242	29.5366	26.4156	45.761	46.508	51.0388	55.8524
AAEL005980	0.094596	0.180218	0.077754	0.176409	0.132244	0.023489	0.123947	0	0.064416	0.052963	0.110605	0	0	0.033825	0.0361075	0.06344	0	0.069338	0	0.0331945	0	0	0	0	0	0	0	0	0.125921	0.0314803	0.08419	0	0.027581	0	0.0279427	0	0	0	0	0	0.275305	0	0.075892	0	0.0877992	0	0.166664	0.038086	0.181502
AAEL005979	0.128029	0.067984	0.019994	0.056831	0.0682095	0.745869	0	0	0.027972	0.19346	0	0.313862	0.051572	0	0.0913585	0.020392	0	0	0.038078	0.0146175	0	0.021431	0	0.031638	0.0132672	0.042927	0.113469	0.066911	0.057541	0.070212	0.080822	0	0.01726	0.082005	0.0450217	0	0.616089	0.035498	0	0.162897	0.248837	0.062357	0.119777	0.452385	0.220839	0.284545	0.072397	0	0.262393
AAEL019044	23.6387	1.58991	13.6965	1.22384	10.0372	2.81096	0.866099	0	1.67806	1.33878	4.83313	1.31588	1.93463	0.635639	2.17982	7.1513	0.565749	4.97274	18.5928	7.82065	7.75002	1.44695	0.671989	1.55008	2.85476	16.3427	1.66694	0	3.3885	5.34954	3.1644	1.30186	3.51478	1.12153	2.27564	2.38905	1.9154	1.87742	0.804824	1.74667	7.46244	0.226599	2.20135	7.79461	4.42125	2.79241	2.89053	2.60997	2.40064
AAEL019045	23.4936	1.52513	12.2065	1.36715	9.64808	3.13794	1.07001	0.917245	1.33557	1.61519	6.21324	0.972791	1.56381	1.47232	2.55554	9.65614	1.31481	4.56533	15.5726	7.77723	8.11144	1.66501	0.816182	1.80959	3.10056	17.5051	2.15794	0.862741	2.62489	5.78766	3.5681	1.2504	2.88541	0.900597	2.15113	2.34612	1.71596	2.10869	0.87072	1.76037	7.46574	1.85347	2.30268	6.43093	4.51321	3.89531	2.69522	2.36074	2.4286
AAEL001010	0	0	0	0	0	0	0	0	0	0	0	0	0	0	0	0	0	0	0	0	0	0	0	0	0	0	0.018362	0	0	0.0045905	0	0	0	0	0	0	0	0	0	0	0.021281	0	0	0.030768	0.0130122	0	0.028234	0	0
AAEL026320	0.039737	0.012011	0	0.052206	0.0259885	0.039059	0	0	0	0.00976475	0.08201	0	0	0.016142	0.024538	0	0.031379	0	0	0.00784475	0	0	0	0	0	0	0.038984	0	0	0.009746	0.076921	0	0.010158	0.023709	0.027697	0	0.059481	0	0	0.0148702	0.078198	0	0.020258	0	0.024614	0.105096	0.074789	0.057596	0.123482
AAEL018150	17.6256	18.7821	14.3231	16.9206	16.9128	3.58869	8.32094	8.0468	9.35308	7.32738	3.28376	1.37308	2.43101	1.93891	2.25669	3.51214	2.50306	2.0904	3.83378	2.98485	1.90057	3.33545	2.82118	1.8653	2.48063	4.53406	5.5336	2.72134	6.19238	4.74534	12.3995	11.967	10.9814	10.8785	11.5566	4.33862	2.83209	2.8849	8.70414	4.68993	36.0121	23.1282	35.4284	35.9812	32.6375	16.7167	10.107	6.85934	16.1105
AAEL000984	0.992006	1.39946	1.27083	1.80652	1.3672	0.643068	0.908504	1.39411	1.86878	1.20362	0.322081	0.141186	0.203764	0.112187	0.194804	0.203481	0.200511	0.174213	0.183779	0.190496	0.210737	0.245599	0.289855	0.310927	0.26428	0.415471	0.372268	0.231124	0.383362	0.350556	0.412453	0.752045	0.516257	0.405373	0.521532	0.518895	0.567054	0.311725	0.49766	0.473833	0.655342	0.628245	0.69527	0.61939	0.649562	0.881366	0.982244	0.76137	0.683713
AAEL021093	3.2022	4.43813	3.56358	3.13092	3.58371	4.23183	3.39083	2.80622	3.21242	3.41032	7.25995	6.71402	6.48194	7.50624	6.99054	6.29968	6.00017	6.2511	6.43833	6.24732	6.7891	5.60393	6.1405	6.03579	6.14233	5.48733	5.52878	4.0878	4.90571	5.00241	2.30554	4.22794	2.99449	3.62251	3.28762	2.41499	3.45488	2.8572	1.65465	2.59543	2.54383	3.62041	3.85284	3.56824	3.39633	5.24372	6.58799	6.61536	6.61707
AAEL000993	8.05781	6.02316	6.25279	6.77938	6.77829	8.32136	6.20449	7.04604	6.6527	7.05615	2.95052	3.27348	4.63424	3.10205	3.49007	3.30119	2.10812	1.6081	2.37229	2.34743	4.01052	2.94528	2.67166	4.22471	3.46304	6.51636	5.6332	5.50987	6.03354	5.92324	11.2203	9.09497	9.46956	9.59203	9.84421	11.4332	7.86657	10.9908	8.66566	9.73905	17.6225	12.6391	17.5241	16.116	15.9754	20.8572	12.7513	16.89	12.0942
AAEL025753	0	0	0	0	0	0	0	0	0	0	0	0	0	0	0	0	0	0	0	0	0	0	0	0	0	0	0	0	0	0	0	0	0	0	0	0	0	0	0	0	0.020204	0	0	0	0.005051	0	0.065622	0	0
AAEL000999	0.988769	2.75332	0.551599	0.459285	1.18824	1.18081	1.41534	0.938827	0.790107	1.08127	1.79111	1.08116	0.519002	1.0743	1.11639	3.03567	2.51223	1.49725	2.09193	2.28427	2.97949	3.52424	2.0247	1.69108	2.55488	2.46686	3.71772	2.90313	2.43146	2.87979	1.53329	3.60302	1.26941	1.08582	1.87289	2.33473	3.79706	2.48042	1.05334	2.41639	1.94693	4.28011	2.24298	2.29569	2.69143	5.52056	9.80737	3.16832	4.14302
AAEL000985	15.0684	18.7365	12.3608	14.2824	15.112	19.3438	15.1996	14.2102	14.266	15.7549	11.3519	11.8801	8.3989	10.485	10.529	13.9202	10.6391	8.94974	13.6359	11.7862	14.9501	14.2001	13.4782	15.6906	14.5797	26.847	28.9275	29.5949	29.1608	28.6325	45.0039	35.7152	35.977	42.3052	39.7503	45.2442	35.9346	38.9165	39.3966	39.873	64.5888	56.0846	55.4433	64.2058	60.0806	63.9497	64.4774	49.9494	47.3457
AAEL000987	3139.54	3212.49	3212.62	3369.52	3233.54	3249.35	3132.57	3212.22	3348.63	3235.69	2646.8	2752.36	2850.15	2620.71	2717.51	2425.19	2506.91	2759.26	2653.92	2586.32	2269.25	2494.83	2704.53	2252.53	2430.28	2005.8	2292.52	2362.17	2122.18	2195.67	2029.8	2163.13	2256.15	2062.04	2127.78	1922.18	2114.96	2032.66	2058.97	2032.19	1955.06	1834.98	2045.89	2014.65	1962.64	3078.45	2666.61	3149.2	3589.03
AAEL000994	21.862	21.4353	17.8352	21.7189	20.7129	26.2001	22.2452	21.8338	24.7508	23.7575	17.0777	14.8866	16.638	16.428	16.2576	12.6618	11.1352	4.82301	8.54305	9.29076	11.9474	16.9696	8.99499	13.5524	12.8661	15.3385	17.7476	11.8738	15.8615	15.2053	21.5258	17.9377	14.2005	15.2759	17.2349	16.9814	16.6568	18.8837	18.7885	17.8276	26.2459	24.6212	28.9593	31.3094	27.784	41.8108	43.9009	36.7328	40.0934
AAEL007407	3.15754	3.11726	3.03277	3.24401	3.13789	2.41937	2.54056	2.50203	2.122	2.39599	1.99015	2.01492	2.48142	1.92678	2.10332	2.07444	1.40579	1.20103	1.5526	1.55847	1.73223	1.3516	1.5432	1.82379	1.61271	1.98649	1.56937	1.9765	1.59924	1.7829	2.27873	1.8673	1.89273	2.88269	2.23036	2.62308	1.83656	2.38942	2.8035	2.41314	5.13441	3.77495	5.59476	6.16527	5.16735	6.8471	5.26888	6.10457	4.83005
AAEL007410	10.4952	9.77453	8.967	10.1663	9.85076	11.6999	8.56448	10.1584	10.0635	10.1216	14.5909	12.7262	13.2657	14.1374	13.6801	12.5231	9.97211	10.1458	9.64498	10.5715	10.7874	8.84786	9.72277	11.795	10.2883	10.2407	9.58991	10.0766	9.24757	9.7887	12.1316	11.8616	12.5713	11.5231	12.0219	16.7469	10.5321	13.8619	13.6592	13.7	21.8409	17.6828	20.8383	21.7895	20.5379	30.5089	19.8873	22.717	23.6132
AAEL021595	3.71915	5.77342	4.34825	4.41683	4.56441	5.03267	5.54764	5.21508	4.41342	5.0522	5.7823	5.55597	5.57576	5.94268	5.71417	6.13371	5.23315	6.12319	6.48222	5.99307	4.71154	6.84794	6.69066	5.83496	6.02128	5.37404	6.26499	9.96914	4.68437	6.57314	3.96607	4.38215	3.00774	3.657	3.75324	2.60172	3.84257	4.45931	4.38092	3.82113	6.17573	5.05364	7.13131	6.02729	6.09699	11.9534	10.3968	14.1955	12.6465
AAEL007409	3.22111	2.55542	3.19875	3.08779	3.01577	3.99675	2.14899	3.06583	2.94676	3.03958	5.11986	4.63916	3.67184	4.46429	4.47379	3.94759	2.9716	2.19256	2.73548	2.96181	3.6053	3.44573	3.312	3.81653	3.54489	3.32305	3.44358	3.0645	3.62491	3.36401	3.15602	3.51206	3.53753	3.63727	3.46072	3.91047	2.87108	3.44602	2.8785	3.27652	5.95826	4.80064	5.73756	5.56919	5.51641	10.9432	5.87985	8.71783	8.49745
AAEL022559	0.916901	1.21495	1.32008	1.97674	1.35717	1.71061	0.769216	1.38195	2.42587	1.57191	0.699978	1.39675	1.09196	0.862464	1.01279	0.261742	0.750843	0.790218	0.422683	0.556372	1.03072	0.594794	0.568506	0.141464	0.58387	0.967711	0.178375	0.538881	0.632357	0.579331	0.254279	0.320568	0.370627	0.795049	0.435131	0.329417	0.826044	0.889491	0.280596	0.581387	0.952289	0.937927	1.33752	1.09383	1.08039	2.77956	1.7321	4.28071	3.3691
AAEL008911	2.75978	2.86171	2.35215	1.14734	2.28025	2.44874	2.63129	1.936	1.65493	2.16774	1.41386	1.56424	0.625899	1.32132	1.23133	1.55063	1.47829	1.37706	0.955812	1.34045	1.44633	2.52417	1.09178	2.11015	1.79311	2.36897	1.74817	2.47624	1.13572	1.93228	1.69606	2.56817	1.87003	1.77765	1.97798	2.1792	2.74113	3.20165	3.79148	2.97836	4.38587	4.32895	5.07338	5.56745	4.83891	6.41468	6.37328	6.84426	6.32634
AAEL008914	0.424134	0.503104	0.213824	0.341491	0.370638	0.485477	0.251053	0.23396	0.291697	0.315547	0.31791	0.498456	0.203426	0.290044	0.327459	0.069012	0.204092	0.296081	0.156677	0.181466	0.595238	0.335716	0.340948	0.42632	0.424555	0.55212	0.309294	0.451243	0.254868	0.391881	0.684415	0.517185	0.583562	0.40048	0.546411	0.988616	0.766498	0.519782	0.80769	0.770647	1.44526	1.32866	1.42453	1.64712	1.46139	1.7458	1.35241	1.68194	0.986194
AAEL008906	3.7169	3.86685	3.79783	3.07236	3.61348	6.37011	5.45609	4.7297	4.59784	5.28843	4.7208	4.72324	3.21739	4.01658	4.1695	5.09654	4.99364	2.70951	3.02974	3.95736	4.23667	5.50287	6.13496	5.28032	5.28871	6.10015	8.04723	6.48722	7.90941	7.136	6.55806	5.61965	5.20551	7.13079	6.1285	5.16296	6.1425	5.87904	5.65033	5.70871	7.24305	6.19617	6.95295	6.80181	6.79849	10.8365	10.3741	7.42872	11.5397
AAEL021756	0.728847	0.335411	0.598423	0.634034	0.574179	0.325855	0.462545	0.182433	0.180193	0.287756	0.102521	0.245284	0.198623	0.072121	0.154637	0.110723	0.04976	0.02453	0.403793	0.147201	0.115177	0.068238	0.197623	0.20504	0.146519	0.33275	0.121445	0.309743	0.18091	0.236212	0.120343	0.351012	0.075979	0.384653	0.232997	0.297602	0.216466	0.046949	0.49682	0.264459	0.615704	0.502494	0.78733	0.73886	0.661097	0.540705	0.44606	0.520814	0.713605
AAEL002724	0.262933	0.105907	0.080591	0.098573	0.137001	0.363321	0.143435	0.284966	0.229785	0.255377	0.172001	0.174132	0.071444	0.138751	0.139082	0.180825	0.114909	0.014479	0.098149	0.102091	0.104453	0.06981	0.152508	0.062123	0.0972235	0.095663	0.073173	0.041454	0.076892	0.0717955	0.142991	0.115789	0.077585	0.12793	0.116074	0.052061	0.066711	0.10292	0.141807	0.0908748	0.654782	0.161707	0.410739	0.234273	0.365375	0.9572	0.232942	0.48268	0.425182
AAEL002726	0.17455	0.093175	0.054181	0	0.0804765	0.040736	0	0	0	0.010184	0	0	0	0	0	0	0	0	0	0	0	0	0	0	0	0	0	0	0	0	0.068676	0	0	0.128385	0.0492652	0	0	0	0.094316	0.023579	0.103642	0.213831	0.197428	0.103215	0.154529	0	0.057461	0.291507	0
AAEL023060	9.77385	7.1457	6.43502	6.28224	7.4092	8.19623	6.19479	7.01241	6.58614	6.99739	7.00893	6.41329	5.95514	6.69299	6.51759	5.39741	5.24523	2.16436	2.98362	3.94765	5.08797	5.55511	4.35982	4.35257	4.83886	8.62065	10.3833	6.25698	6.82489	8.02145	9.23824	8.02582	6.80712	7.31164	7.8457	8.54327	7.72721	6.93874	8.42173	7.90774	15.6484	10.1365	10.6321	13.3445	12.4404	20.6564	19.5124	15.9027	20.4378
AAEL021259	0	0	0	0	0	0	0	0	0	0	0	0.09205	0	0	0.0230125	0	0	0	0	0	0	0	0	0	0	0	0	0	0	0	0	0	0	0	0	0	0	0	0	0	0	0	0	0	0	0	0	0	0.179316
AAEL025714	1.9797	2.54572	2.70397	2.80298	2.50809	2.43117	1.32281	2.10401	2.08712	1.98628	2.33306	1.58915	2.6344	3.43656	2.49829	1.88411	0.874174	0.649477	1.33759	1.18634	1.47572	2.09362	0.816152	1.74331	1.5322	0.854514	1.2805	0.984749	1.34157	1.11533	3.2802	1.72482	2.20309	1.25838	2.11662	1.62177	1.49548	1.17876	0.949088	1.31127	3.59448	4.21333	3.91754	3.52824	3.8134	7.57711	8.5488	10.0551	4.84266
AAEL002723	98.9971	81.9427	112.008	106.423	99.8428	124.008	103.44	138.511	130.266	124.056	119.332	107.739	104.689	147.685	119.861	198.358	177.905	129.025	193.807	174.774	228.694	175.607	209.862	205.917	205.02	107.577	149.456	114.825	101.519	118.344	126.094	112.706	101.999	112.939	113.435	91.7141	99.8354	100.276	83.4561	93.8205	93.1141	103.304	103.015	100.51	99.9857	119.893	109.508	109.05	109.614
AAEL002728	18.4022	25.9248	22.7746	21.5024	22.151	21.6133	20.626	22.3916	18.2377	20.7172	24.0328	25.5057	25.9727	28.7682	26.0699	30.4209	32.764	32.6896	32.3041	32.0447	23.9105	28.4916	32.2665	23.7981	27.1167	13.6106	15.9758	13.854	10.5521	13.4981	5.91015	11.3498	7.87939	6.93859	8.01949	6.04276	10.8771	6.77675	5.95772	7.41359	11.4353	13.545	16.871	18.4095	15.0652	54.0415	44.1909	55.3056	68.9027
AAEL002722	32.5138	35.3654	31.0395	29.4889	32.1019	31.4958	29.4739	28.5982	33.6024	30.7926	22.5314	24.836	23.3464	20.1912	22.7262	17.8216	14.7309	20.7308	20.6853	18.4921	21.0172	18.724	23.916	17.6555	20.3282	18.2798	21.5744	18.2534	21.4959	19.9009	13.5036	20.7644	17.373	14.7034	16.5861	14.9316	17.4271	15.4377	14.5651	15.5904	22.5604	17.0201	20.35	20.7631	20.1734	40.4512	33.5509	46.4987	43.6123
AAEL002719	7.33771	8.60426	6.53285	6.87184	7.33666	8.55424	6.64889	6.68431	6.13531	7.00569	8.57554	9.44178	9.56793	7.53553	8.78019	10.8243	11.195	14.7748	12.5306	12.3312	7.92117	12.6298	11.9476	8.20153	10.175	4.14748	8.80265	5.20332	3.47449	5.40698	3.16399	6.19947	2.52047	3.06965	3.73839	2.42224	5.03246	2.6296	3.17495	3.31481	5.41025	7.78443	6.11551	6.97403	6.57106	29.0456	21.6509	28.0246	33.6295
AAEL002714	0.135825	0.742835	0.023063	0	0.225431	0.442495	0.441955	0.157055	0.045223	0.271682	0.556719	0.275655	0.019895	0.24812	0.275097	0.410021	0.321023	0.198201	0.284317	0.303391	0.430444	0.641066	0.13187	0	0.300845	0.645726	1.31085	0.435999	0.871516	0.816024	1.11233	2.13551	1.66411	1.42354	1.58387	1.45865	1.64125	1.42663	0.931114	1.36441	0.815379	1.64735	1.40741	0.991197	1.21533	1.20306	1.73384	1.397	1.40751
AAEL019529	48.457	55.835	48.4033	53.7285	51.6059	48.5315	50.4945	50.7697	51.1598	50.2389	64.953	75.1349	75.4109	71.5362	71.7587	57.0692	60.7949	40.0733	50.2086	52.0365	45.0527	57.5641	48.5615	34.2422	46.3551	17.3902	39.2915	14.8718	12.2826	20.959	14.076	20.9233	12.184	12.3058	14.8723	9.28054	18.8591	10.4574	7.05788	11.4137	15.9895	22.4814	18.948	31.737	22.289	90.3644	83.991	91.3788	126.201
AAEL024874	0	0	0	0	0	0	0	0	0	0	0	0	0	0	0	0	0	0	0	0	0	0	0	0	0	0	0	0	0	0	0	0	0	0	0	0	0	0	0	0	0	0	0	0	0	0	0	0	0
AAEL025192	0	0	0	0	0	0	0	0	0	0	0	0	0	0	0	0	0	0	0	0	0.03052	0	0	0	0.00763	0	0	0.037113	0	0.00927825	0	0	0	0.02346	0.005865	0	0	0	0	0	0.045448	0	0	0	0.011362	0	0	0	0
AAEL002721	25.6155	32.4568	20.9581	28.9478	26.9946	36.2992	38.2799	55.829	41.06	42.867	12.696	13.4262	17.4326	13.2378	14.1982	31.3784	39.2127	22.7574	34.0487	31.8493	40.511	36.8032	41.3851	35.2728	38.493	29.755	32.6603	26.5344	37.7338	31.6709	37.8235	37.197	31.434	36.0616	35.629	56.1983	38.3006	35.1481	42.5531	43.05	66.2168	56.347	65.3175	74.5885	65.6175	99.6806	84.3199	77.6067	82.6136
AAEL002720	1.87576	1.34612	0.44938	1.25942	1.23267	0.309145	0.270993	0.225052	0.894685	0.424969	0.1094	0.341806	0.099681	0.634353	0.29631	0.283788	0.207102	0.10339	0.744083	0.334591	0.212877	0.308223	0.514903	0.790571	0.456643	1.08492	0.542848	1.16378	1.84442	1.15899	0.687282	1.12198	0.150659	1.04606	0.751493	0.414812	0.859719	0.343202	0.586322	0.551014	1.0893	0.484578	1.40662	2.41916	1.34992	1.01259	0.722399	1.64917	1.84153
AAEL002725	0	0	0	0	0	0	0	0	0	0	0	0	0	0	0	0	0	0	0	0	0	0	0	0	0	0	0	0	0	0	0	0	0	0	0	0	0	0	0	0	0.058556	0	0	0	0.014639	0	0	0	0
AAEL002704	0	0	0	0	0	0	0	0	0	0	0	0	0	0	0	0	0.048581	0	0	0.0121452	0	0	4.85718	0	1.2143	0	0	0	0	0	0	0.036751	0	0	0.00918775	0.048466	0	0.057504	0	0.0264925	0.042549	0	0	0.061517	0.0260165	0.147532	0	0	0
AAEL021048	0.619059	0.555896	0.254226	0.423589	0.463193	0.107058	0.353493	0.330432	0.296036	0.271755	0	0	0.089708	0.237376	0.081771	0.057395	0.1404	0	0.142614	0.0851023	0	0.143042	0.12671	0.182171	0.112981	0.247261	0.118972	0.349079	0	0.178828	0.178461	0.092898	0.407122	0.246251	0.231183	0.443568	0.308616	0.127597	0.688816	0.392149	0.596359	0.26483	1.47056	0.721144	0.763223	0.832048	0.333172	0.883816	0.887905
AAEL002730	0	0.08541	0	0.034501	0.0299777	0	0.062883	0	0	0.0157207	0	0	0	0	0	0	0	0	0	0	0	0	0	0.099118	0.0247795	0	0	0	0.026068	0.006517	0	0.100562	0	0.072736	0.0433245	0	0	0	0	0	0.144828	0.195774	0.21399	0	0.138648	0	0	0.12273	0.121371
AAEL025259	1.20165	1.29197	1.14929	0.940341	1.14581	0.952532	0.691782	0.792181	0.840944	0.81936	0.617499	0.539754	0.433876	0.560512	0.53791	0.329338	0.426385	0.204193	0.580537	0.385113	0.566723	0.73942	0.599577	0.410122	0.57896	0.783961	0.597906	0.591538	0.58875	0.640539	1.13377	1.09028	0.668616	0.590037	0.870675	0.651715	1.02602	1.22437	1.1731	1.0188	1.43953	2.10984	1.75599	1.82561	1.78274	2.38597	2.99795	3.35524	2.56226
AAEL020341	7.99422	8.41484	7.24766	7.57807	7.8087	9.10462	8.59602	10.0317	8.62235	9.08867	9.72133	9.08685	9.65999	9.24488	9.42826	6.80794	6.15866	5.98026	6.16101	6.27697	6.80179	7.2481	6.72424	6.69553	6.86742	6.79939	8.4372	6.11875	6.37491	6.93256	8.1498	8.04864	6.67781	8.51919	7.84886	10.0857	8.31415	8.31383	10.4392	9.28821	18.9603	14.7923	16.8535	17.9862	17.148	18.8009	21.4846	17.3696	19.9548
AAEL019896	6.89029	6.07331	7.07268	7.64561	6.92047	6.63931	5.68678	5.89545	6.89563	6.27929	5.07784	5.56281	5.35007	6.0905	5.5203	7.41893	7.26696	5.17868	6.01294	6.46938	4.59599	5.88757	5.9287	3.31994	4.93305	1.61726	4.71975	2.06942	1.16243	2.39221	0.812405	1.80613	0.723127	0.671712	1.00334	0.927933	1.74711	0.91152	0.863798	1.11259	1.9608	2.58183	2.10917	3.32999	2.49545	11.0957	9.58365	12.6253	18.2836
AAEL019897	0	0	0.029696	0	0.007424	0.024029	0.115442	0	0	0.0348678	0.05211	0	0	0	0.0130275	0	0	0	0	0	0	0	0	0.037423	0.00935575	0	0.027048	0	0.032204	0.014813	0	0	0	0	0	0	0	0.017652	0	0.004413	0.031348	0.076102	0	0	0.0268625	0	0.124631	0.077923	0.03853
AAEL023825	2.12695	1.61928	1.84162	1.69509	1.82074	2.30988	2.27893	1.58002	1.85481	2.00591	2.95731	2.71339	2.21801	2.39717	2.57147	2.37687	2.51533	1.60118	2.16531	2.16467	1.97043	1.7375	2.78617	2.04758	2.13542	2.4531	2.17294	1.82412	1.79311	2.06082	2.85133	2.27622	1.70913	2.34586	2.29563	2.28335	2.0453	2.30943	2.3595	2.2494	3.70908	3.13049	3.98243	4.28795	3.77749	7.18227	4.08098	6.49622	5.10855
AAEL026964	0.290622	0.078766	1.07279	0.927751	0.592483	0.334021	0.248855	0.165093	0.492848	0.310204	0.446489	0.42199	0.259694	0.439347	0.39188	0.571195	0.129626	0	0.290324	0.247786	0.109567	0.346282	0.354333	0.162603	0.243196	0	0.080673	0	0.153028	0.0584252	0.99955	0.33824	0.266991	0.170171	0.443738	0.405465	0.593846	0.301315	0.103938	0.351141	0.759045	0.944283	0.496033	0.829266	0.757157	0.200622	0.237638	0.501709	0.783631
AAEL014507	7.90352	11.3416	6.68406	7.51624	8.36136	11.3526	10.5411	8.81213	7.82954	9.63384	8.11328	11.0906	8.79242	12.5709	10.1418	14.4723	16.6183	11.7446	12.7132	13.8871	13.6277	18.0989	16.4394	17.4108	16.3942	17.2021	19.2387	17.5384	17.0371	17.7541	15.5759	16.4087	14.981	17.3193	16.0712	16.1183	19.8679	16.0155	15.0272	16.7572	24.1187	21.9016	22.0765	24.8062	23.2258	27.1486	27.5048	23.7532	28.0236
AAEL003452	34.2292	41.0905	43.5525	47.855	41.6818	37.4982	41.6414	31.6053	38.4414	37.2966	7.06967	7.5818	6.40199	7.28707	7.08514	8.23428	7.66896	7.28261	6.30813	7.3735	9.80438	10.4778	8.79385	8.39126	9.36681	9.26073	11.7862	9.39166	10.5956	10.2585	14.1008	13.4995	14.9482	12.803	13.8379	15.2778	12.2803	15.8648	16.8388	15.0654	26.3241	19.9004	33.6895	32.5091	28.1058	43.4714	36.4801	54.2769	47.0947
AAEL003477	13.2903	17.622	10.9314	12.1496	13.4983	15.0977	12.3069	13.8606	12.4937	13.4397	14.5554	12.6085	12.1647	12.2785	12.9018	11.9066	12.2961	15.6507	14.3285	13.5455	11.6933	14.8964	14.0641	11.7415	13.0988	9.32963	13.4849	12.0423	8.96603	10.9557	5.48217	9.81213	5.30696	4.40878	6.25251	6.86277	7.70082	5.38771	5.27787	6.30729	11.074	11.3087	12.3125	13.2903	11.9964	43.9542	25.3672	30.9826	43.7401
AAEL019871	3.96871	5.50907	3.43534	3.93754	4.21267	4.05129	3.88354	3.88058	3.95622	3.94291	3.72053	4.21623	4.31745	4.70611	4.24008	5.76893	7.21501	6.2293	4.90432	6.02939	6.46155	8.30948	5.73149	7.4562	6.98968	3.48819	6.51657	5.32301	2.45833	4.44653	0.799621	1.46802	0.734352	1.00614	1.00203	0.523647	2.19561	1.427	0.600324	1.18665	1.60728	1.39275	2.36746	2.85314	2.05516	11.6545	8.41323	13.4757	18.1134
AAEL003462	2.32113	3.26487	2.83684	2.23827	2.66528	4.84403	6.06902	10.9621	5.33974	6.80373	8.86474	9.29478	8.64544	6.89973	8.42617	3.99912	4.86589	5.77495	3.72419	4.59104	2.02734	6.92561	3.19813	1.93726	3.52208	2.02456	5.35564	1.99329	2.27153	2.91126	2.11697	2.87794	2.20034	3.57484	2.69252	3.39732	5.03657	4.30564	3.85825	4.14944	5.43029	6.50796	5.11019	5.39056	5.60975	6.56065	9.44762	6.15003	6.41861
AAEL003467	1.66592	1.94586	0.500438	1.26757	1.34495	0.161044	0.455082	0.155027	0.842819	0.403493	0.066755	0.365829	0.11975	0.184967	0.184325	0.253472	0.063774	0.125545	0.219383	0.165544	0	0.117086	0.278969	0.150591	0.136661	0.182277	0.11704	0.282675	0.439707	0.255425	0.267921	0.709937	0.17412	0.163474	0.328863	0.063199	0.051696	0.047323	0.048494	0.052678	0.547012	0	0.469035	2.62818	0.911058	0.631799	0.022574	0.13447	0.636952
AAEL019870	0.38292	0.471067	0.062353	0.141878	0.264555	0.345663	0.07495	0.328975	0.254617	0.251051	0	0.369794	0	0	0.0924485	0.030123	0.141724	0.055301	0.031249	0.0645992	0	0.465168	0	0.163684	0.157213	0.033016	0.105997	0.032531	0	0.042886	0.341285	0.272863	0	0	0.153537	0.101898	0.085443	0	0	0.0468352	0.379816	0.554704	0.424433	0.551004	0.477489	0.86041	1.05844	0.751499	0.736823
AAEL003483	1.25514	1.14525	0.728479	0.896004	1.00622	0.603689	0.327932	0.423318	0.955396	0.577584	0.390162	0.762995	0.365797	0.713987	0.558235	0.636893	0.446537	0.317477	0.745061	0.536492	0.327936	0.420319	0.074451	1.12493	0.486909	0.573222	1.60937	2.09222	1.4498	1.43115	0.798852	3.07553	2.134	1.81755	1.95648	1.97717	1.89937	2.16265	2.15505	2.04856	3.65314	1.54125	3.39242	1.60657	2.54834	3.40388	2.7139	1.67343	2.26899
AAEL003457	0.112703	0.118059	0.109725	0.222109	0.140649	0	0.140039	0.150429	0.081968	0.093109	0.066589	0	0	0.243755	0.077586	0.274613	0.12723	0	0.314335	0.179044	0	0.292994	0.349433	0.324284	0.241678	0.061427	0.328688	0.972565	0.8174	0.54502	0.336116	0.377584	0.322467	0.34769	0.345964	0	0.332342	0	0.024597	0.0892348	0.027673	0.221943	0.034268	0.354213	0.159524	0.231725	0	0.403783	0.327206
AAEL003479	0	0	0.039248	0	0.009812	0	0	0	0.038608	0.009652	0	0	0	0	0	0.078445	0	0	0	0.0196113	0	0.084984	0	0	0.021246	0	0.030556	0	0	0.007639	0	0	0	0	0	0	0	0	0	0	0	0	0	0	0	0	0.088834	0.193535	0.046572
AAEL018302	0	0.03158	0	0.023249	0.0137073	0	0	0	0	0	0	0	0	0	0	0	0	0	0	0	0	0.012755	0	0	0.00318875	0	0	0	0.009087	0.00227175	0	0	0.01857	0	0.0046425	0	0	0	0	0	0	0	0	0	0	0	0	0	0.029717
AAEL024690	6.82397	7.21371	4.90103	6.77017	6.42722	6.21626	6.84795	4.4177	6.74545	6.05684	3.69769	4.15163	3.60501	3.76577	3.80503	3.67322	4.79499	3.39265	4.96318	4.20601	3.42768	4.46525	3.91901	3.68879	3.87518	4.16903	4.42906	3.89675	3.53019	4.00626	3.29595	4.16397	3.47667	3.50415	3.61019	4.62812	4.73097	4.14465	4.943	4.61169	7.45403	8.17249	9.1839	9.46373	8.56854	15.3622	15.6974	13.0238	14.7169
AAEL003454	9.27976	10.5341	8.09085	8.04805	8.98819	10.4832	7.86775	10.3463	8.4113	9.27714	11.923	8.58369	9.90301	12.5629	10.7432	11.5792	9.09372	10.183	7.87896	9.68374	12.9548	8.77038	9.93287	10.5831	10.5603	9.43959	10.4331	10.3299	7.13786	9.3351	10.7635	9.57286	9.45699	9.20517	9.74963	12.9636	8.78499	10.5537	9.60206	10.4761	17.2791	14.2451	19.0825	19.5977	17.5511	24.0188	19.2085	22.3636	19.1279
AAEL003466	11.0596	11.5324	10.1006	10.2961	10.7472	10.9782	10.3486	10.2203	9.55309	10.2751	11.4209	11.5685	11.5327	12.3934	11.7289	11.3517	13.1044	8.63266	9.87811	10.7417	11.4716	11.4259	10.1336	10.2039	10.8088	11.4383	16.2118	12.6469	12.6411	13.2345	11.4235	13.9778	12.4071	13.1099	12.7296	11.0373	14.3631	10.2544	11.3616	11.7541	15.2231	13.9489	14.5655	15.8514	14.8972	26.9371	26.1277	24.5296	30.1672
AAEL003487	6.54567	7.422	6.00918	7.10706	6.77098	8.61393	7.37048	6.95917	6.29295	7.30913	6.86202	4.21716	3.13795	5.09313	4.82757	7.00596	5.55186	3.95432	4.24657	5.18968	6.81093	6.44274	4.86667	6.82874	6.23727	13.1913	12.452	9.76358	13.4652	12.218	27.1948	19.2169	20.1779	22.0864	22.169	27.8966	17.0567	20.7397	27.2976	23.2477	28.1165	21.8479	20.811	24.1478	23.7308	21.8713	25.6031	23.4921	21.6142
AAEL024700	15.8716	17.9528	14.7344	14.9717	15.8826	18.5726	16.7715	14.292	15.8292	16.3663	30.1979	34.5025	31.8083	36.9967	33.3763	24.1291	27.4905	20.0449	20.9738	23.1596	21.0844	24.2454	18.4309	16.0867	19.9619	9.57877	18.4943	9.4795	11.2387	12.1978	10.9157	13.7292	8.71617	8.26101	10.4055	9.44385	12.0919	8.10641	9.52055	9.79068	14.4746	14.8483	15.4791	18.4269	15.8072	29.2896	33.2418	24.3261	39.4926
AAEL024259	1.01965	0.691661	0.85925	1.06198	0.908136	0.889422	0.460441	0.609101	0.86479	0.705939	0.466379	0.512829	0.871848	0.487027	0.584521	0.632913	0.269304	0.632334	0.674985	0.552384	0.415576	0.903034	0.225829	0.536614	0.520263	0.540454	0.374003	0.548981	0.547392	0.502707	0.717382	0.582444	0.531285	0.560138	0.597812	0.952922	0.483848	0.606056	1.21745	0.815069	0.940851	0.885465	1.49503	1.80732	1.28217	2.57295	1.4363	2.50998	1.77976
AAEL020104	1.84231	1.61529	1.53936	1.82371	1.70517	1.40095	1.28506	1.1393	1.10397	1.23232	0.93197	0.454544	1.12608	0.729327	0.810481	0.782725	1.07001	0.688767	1.12731	0.917203	0.574031	0.978894	0.923528	0.944995	0.855362	0.76904	1.07691	1.15997	1.15966	1.04139	1.02416	0.906344	0.970657	0.927287	0.957111	1.56545	1.26535	1.47491	1.30931	1.40376	2.53672	2.10706	2.74106	2.22494	2.40245	3.96766	3.61447	4.33372	3.78761
AAEL014863	10.3666	9.40579	9.10232	8.65387	9.38215	11.2672	10.7107	8.76285	8.88304	9.90596	2.25791	1.67778	2.29325	2.5366	2.19138	3.23855	2.90822	2.35225	3.76343	3.06561	5.4189	4.81985	4.97396	6.60297	5.45392	11.5721	9.09396	12.9561	14.4275	12.0124	6.64919	7.21402	5.29549	6.08846	6.31179	3.52733	4.45923	3.98167	5.11647	4.27118	5.56538	4.78359	4.29925	6.39551	5.26094	6.37747	5.61925	5.55117	8.94919
AAEL014864	0.16847	1.00817	0.508575	1.22468	0.727473	1.03652	0.540131	0.620302	0.737458	0.733602	0.530312	0.412536	0.281741	0.602913	0.456875	0.834385	0.394644	1.00566	0.826489	0.765293	0.413109	1.01423	0.551219	0.868124	0.711672	1.0756	0.954437	1.19435	0.47624	0.925156	0.898167	0.678394	0.769215	0.843106	0.79722	1.00999	1.1952	0.716926	1.02487	0.986745	2.98379	1.62274	3.37117	2.81537	2.69827	3.68903	2.79382	2.32197	2.41783
AAEL011142	3.00397	3.46514	3.36152	2.85769	3.17208	3.13568	2.3707	2.83309	2.73312	2.76815	1.76403	1.9147	1.39083	1.72807	1.69941	0.726936	0.539309	0.366792	0.663097	0.574033	0.779323	1.13269	0.799535	0.927841	0.909847	1.32726	1.68652	1.28496	1.75322	1.51299	5.64743	3.72028	4.98305	5.51835	4.96727	10.0668	6.9141	9.18493	12.0072	9.54327	17.4281	13.1362	16.9047	17.1895	16.1646	9.36347	9.10723	8.5872	7.63422
AAEL012731	111.19	117.172	112.789	127.333	117.121	109.587	122.451	109.234	121.862	115.783	70.3669	87.7652	81.5357	88.3538	82.0054	90.6743	124.093	105.66	117.741	109.542	152.74	147.846	186.504	173.498	165.147	92.0407	119.537	122.937	87.8953	105.602	25.4596	44.979	22.6761	19.2037	28.0796	16.3629	28.2588	16.8447	12.5787	18.5113	22.9131	25.3719	29.0177	26.5605	25.9658	86.1569	64.3437	97.0111	146.94
AAEL024536	2634.57	2824.15	2661.31	2789.13	2727.29	2713.78	2706.42	2617.28	2743.63	2695.28	2244.41	2400.51	2371.59	2222.74	2309.81	2090.93	2158.34	2229.01	2176.55	2163.71	1995.35	2176.26	2241.82	1908	2080.36	1823.26	2067.2	2069.44	1880.04	1959.98	1967.55	2056.99	2108.08	1930.18	2015.7	2022.6	2135.34	2073.45	2116.8	2087.05	2286.66	1983.6	2388.59	2345.56	2251.1	3342.76	2875.43	3289.75	3487.94
AAEL022381	0.035695	0.261369	0.041818	0.392142	0.182756	0.568995	0.455747	0.630968	0.121307	0.444254	0.295914	0.978849	0.084083	0.137804	0.374163	0.115136	0.100436	0.714963	0.093059	0.255898	0	0	0.201169	0.404323	0.151373	0	0	0.156512	0	0.039128	0.33792	0.262339	0.422623	0.381134	0.351004	1.00253	0.071014	0.141519	0.644236	0.464826	0.353743	1.40339	0.595478	0.923991	0.81915	1.0571	0.154457	0.777523	0.798283
AAEL021986	6.71376	8.082	6.23884	6.75008	6.94617	6.93071	6.73407	5.88656	6.83978	6.59778	7.14301	9.22358	8.55197	9.58047	8.62476	7.88985	8.72152	7.15855	7.29172	7.76541	6.52627	8.54596	7.41255	7.04021	7.38125	5.28488	7.45371	5.96108	5.54595	6.0614	6.08984	6.33068	5.89107	5.8215	6.03327	6.38678	6.16734	5.83774	6.84306	6.30873	8.9291	8.8364	9.0492	9.28771	9.0256	13.9619	14.6395	13.1102	16.0073
AAEL012047	0.87287	0.700031	0.506135	0.408241	0.621819	0.729978	0.483248	0.431993	0.542468	0.546922	0.170192	0.125559	0.28905	0.349357	0.233539	0.325522	0.353419	0.112858	0.22475	0.254137	0.340056	0.500709	0.372936	0.58353	0.449308	0.986816	1.08647	1.08507	1.0849	1.06082	1.38259	1.05922	1.64736	1.41029	1.37486	1.39358	1.60837	1.21911	1.3229	1.38599	1.0888	1.34548	0.948677	1.25603	1.15975	1.73813	2.16483	1.91964	2.39586
AAEL024411	0.841194	0.593896	0.513398	0.483016	0.607876	0.747824	0.45763	0.493085	0.497856	0.549099	0.303857	0.449321	0.232779	0.394683	0.34516	0.284919	0.633803	0.209035	0.30471	0.358117	0.533475	0.588593	0.425436	0.234121	0.445406	0.47615	0.662444	0.34117	0.530531	0.502574	0.698904	0.980791	0.538316	0.492797	0.677702	0.815138	0.934716	0.803298	0.732858	0.821503	1.49652	1.3618	1.18652	1.28031	1.33129	2.3705	1.90531	1.7083	2.17742
AAEL025998	1.54535	0.72873	1.69905	0.578903	1.13801	1.50175	0.31611	0.897703	2.81417	1.38243	0.724313	0.788172	0.711197	0.806886	0.757642	0.683297	1.21397	0.799595	1.1279	0.956191	0.728318	0.555278	0.569831	0	0.463357	0.85962	0.899097	1.02265	0	0.695341	0.18319	1.01163	0.475308	0.812978	0.620776	0.902279	0.85735	1.14348	2.07545	1.24464	1.57279	0	0.750932	1.14524	0.86724	2.20973	1.50982	3.30867	2.16899
AAEL012051	7.94331	9.61064	8.11653	7.21511	8.2214	8.00548	8.25885	7.52057	6.97783	7.69068	6.89943	6.6133	7.22581	8.38282	7.28034	7.15671	8.32659	6.81941	9.4592	7.94047	9.26041	9.44791	8.30614	8.31425	8.83217	9.88769	9.14993	10.3037	11.0245	10.0914	13.3446	12.4145	12.4278	12.684	12.7177	14.9452	10.6813	11.7844	13.7993	12.8025	20.868	13.3697	21.5409	18.331	18.5274	24.9732	19.0667	22.7578	22.9618
AAEL012052	0.892043	2.84814	3.39951	2.39859	2.38457	1.12209	2.3843	2.51074	2.70128	2.1796	1.07204	2.22663	2.65856	3.61319	2.3926	0.865766	0.854309	1.48504	1.42708	1.15805	0.124101	0.369293	1.11229	0.220329	0.456504	0	0.145322	0.221449	0.05149	0.104565	0.068008	0.274588	0.043893	0.041495	0.106996	0.08374	0.090643	0.142115	0.032672	0.0872925	0.312236	0.197422	0.385492	0.66667	0.390455	0.459755	0.336066	1.0041	0.550549
AAEL021290	0	0.537455	1.18406	0	0.430377	0.272705	0.950363	0.714792	0	0.484465	0.228767	0.661536	0.310456	1.31141	0.628042	0.326285	0	0	0	0.0815712	0.28331	0	0.139206	0	0.105629	0	0	0	0	0	0	0	0	0	0	0	0.177751	0	0	0.0444377	0	0	0	0	0	0	0	0	0.52713
AAEL019592	0.313636	0.55285	0.252065	0.343294	0.365461	0.387413	0.234218	0.165273	0.1712	0.239526	0.101602	0.171325	0.066423	0.127085	0.116609	0.131282	0.14577	0.11772	0.111793	0.126641	0.10711	0.129954	0.119543	0.108167	0.116194	0.228286	0.167352	0.175744	0.175154	0.186634	0.276422	0.270424	0.27013	0.421421	0.309599	0.436797	0.328619	0.207958	0.643163	0.404134	1.8184	0.879643	1.04343	1.57014	1.3279	1.40802	0.629915	0.895439	1.02283
AAEL024975	29.5167	29.3323	28.52	31.3317	29.6752	28.8237	30.819	30.9113	36.4679	31.7555	44.5904	43.7242	40.953	44.5877	43.4638	40.28	50.2726	37.7132	41.4354	42.4253	36.9124	36.7442	39.8369	45.5293	39.7557	25.9258	34.334	32.7445	30.004	30.7521	16.1421	26.1942	17.0384	18.1519	19.3817	14.3135	16.2115	15.1721	15.2099	15.2268	16.4308	13.4437	17.0777	17.0046	15.9892	25.3878	20.7783	26.4076	38.8036
AAEL027018	3.52924	4.01377	3.25699	3.86642	3.66661	3.59629	3.13158	2.97398	2.99562	3.17437	7.16855	6.86047	7.62246	6.38604	7.00938	6.18102	7.16535	6.59886	5.78315	6.4321	4.61486	3.79696	3.90461	3.02799	3.83611	1.59417	2.4256	2.00982	1.41507	1.86116	1.25067	1.92731	1.17819	1.3889	1.43627	1.55005	1.73933	1.55195	0.897249	1.43464	2.18098	2.7765	2.50987	2.23759	2.42624	4.53553	3.38079	4.86514	5.7262
AAEL020466	18.0569	19.8246	19.0903	21.5055	19.6193	18.6033	19.7914	19.8463	24.4976	20.6846	28.0152	29.9413	27.5687	29.3122	28.7094	25.1327	31.9754	27.113	27.1308	27.838	23.5898	23.7219	26.3735	29.1187	25.701	16.6052	20.9742	21.2575	19.5131	19.5875	10.364	16.8778	10.8275	11.9115	12.4952	9.61011	10.6511	10.4795	10.2105	10.2378	10.4982	9.05502	12.334	11.56	10.8618	17.5284	13.7983	17.1632	25.089
AAEL019593	4.238	3.65968	3.54104	5.52192	4.24016	4.49774	3.21425	3.64068	3.17476	3.63186	8.27149	7.00693	8.75259	8.05319	8.02105	6.87041	8.97736	7.56793	6.48337	7.47477	4.70284	4.37538	4.45189	3.34694	4.21926	2.20527	2.28016	2.02863	1.88688	2.10023	1.62427	2.25113	1.92503	1.62596	1.8566	1.59363	2.40838	1.71794	1.12311	1.71077	2.32823	3.48239	3.14005	2.21738	2.79201	4.49535	3.70248	5.60748	4.98493
AAEL023268	0.110642	0.274523	0.215242	0.191694	0.198025	0.092327	0.063473	0.119384	0.208921	0.121026	0	0.119489	0.138794	0.170855	0.107285	0	0	0.238731	0.153716	0.0981117	0.246587	0.22415	0	0	0.117684	0.136908	0.318534	0.027071	0.079892	0.140601	0.138796	0.139235	0.505598	0	0.195907	0.381669	0	0.143303	0	0.131243	0.525226	0.92813	0.05865	0.604018	0.529006	0.451125	1.08932	0.412058	0.730933
AAEL015236	16.5924	24.7832	22.2502	25.0054	22.1578	21.7699	21.1516	23.4981	23.1034	22.3808	39.246	51.0118	39.1055	45.3939	43.6893	44.8164	59.3429	56.771	65.282	56.5531	65.4755	77.169	81.4055	56.8783	70.2321	27.3053	38.1604	34.1837	27.81	31.8648	13.0994	21.8463	14.1279	12.273	15.3367	11.9834	16.0706	12.9531	10.2113	12.8046	19.602	13.5796	19.7437	17.8131	17.6846	39.9282	32.9139	42.8101	43.1712
AAEL025017	4.82936	5.50529	4.49754	4.65375	4.87148	4.34924	4.33577	4.06047	4.32467	4.26754	3.31841	3.16552	2.85945	3.04508	3.09712	3.0771	2.15447	1.87035	2.34915	2.36277	3.55703	3.19717	2.54063	3.09794	3.09819	4.76367	4.20074	3.99242	4.76323	4.43001	5.57314	5.58562	5.30134	5.20691	5.41675	5.53475	5.53073	6.14388	5.17903	5.5971	8.9756	9.31499	9.11651	9.96968	9.34419	14.5185	11.4808	12.9426	10.6453
AAEL026704	0	0	0	0	0	0	0	0	0	0	0	0	0	0	0	0	0	0	0	0	0	0	0	0	0	0	0	0	0	0	0	0	0	0	0	0	0	0	0	0	0	0	0	0	0	0	0	0	0
AAEL014084	0.355436	0.569445	0.054678	0.136649	0.279052	0.398078	0.51643	0.160151	0.212409	0.321767	0.302264	0.312155	0.121811	0.224639	0.240217	0.574771	0.376556	0.245087	0.234227	0.35766	0.512364	0.596518	0.262968	0.157322	0.382293	0.480994	0.8283	0.375739	0.610889	0.573981	1.28344	2.0019	1.35155	1.11226	1.43729	1.39243	1.46825	1.19889	0.991954	1.26288	1.26615	1.2992	1.47665	0.887581	1.2324	1.17789	1.83539	1.05703	1.04187
AAEL019759	0.240188	0.361721	0	0.362587	0.241124	0.683872	0.559956	0.401601	0.831826	0.619314	0.396508	0.328564	0.616508	0.401411	0.435748	0	0	0.374532	0	0.093633	0.10456	0.577659	0.374619	0.443295	0.375033	0.09968	0.431275	0.534388	0.05978	0.281281	0.347604	0.124592	0.250527	0.393918	0.27916	0.343683	0.352727	0	0.48634	0.295687	0.836694	0.258108	0.480556	1.02215	0.649378	0.719215	1.83123	1.2261	1.73764
AAEL019761	0.542267	0.384394	0.22869	0.454627	0.402494	0.589727	0.472778	0.395758	0.619441	0.519426	0.807136	0.227721	0.557826	0.363357	0.48901	0	0.31939	1.17673	0.553663	0.512445	0.17543	0.529178	0.30363	0.626	0.408559	0.163809	0.43448	0.457774	0.18638	0.310611	0.240834	1.10171	0.173575	0.466384	0.495626	0.234603	0.336688	0	0.548668	0.27999	0.946361	0.335114	0.666852	0.899396	0.711931	0.675563	1.81315	1.37458	1.5859
AAEL014089	0.104736	0	0	0	0.026184	0	0	0	0.066117	0.0165292	0	0	0	0	0	0	0.058346	0	0.049058	0.026851	0	0	0	0	0	0	0	0	0	0	0	0.049713	0	0	0.0124283	0.092068	0	0.097771	0.131078	0.0802293	0.077765	0	0.188577	0.07339	0.084933	0	0	0.12604	0.079811
AAEL023538	0	0	0	0	0	0	0	0	0	0	0	0	0	0	0	0	0	0	0	0	0	0	0	0	0	0	0.016894	0	0	0.0042235	0	0	0	0	0	0	0	0	0	0	0	0	0	0	0	0	0	0	0
AAEL024757	2.5447	2.62008	0.640226	3.09712	2.22553	2.84511	3.02461	1.89236	4.16136	2.98086	3.50093	2.66051	2.32912	2.8984	2.84724	3.31442	3.0571	3.84848	3.48848	3.42712	3.86258	2.32925	1.81882	4.49006	3.12518	2.97036	1.36299	1.27627	2.87469	2.12108	4.02136	4.48436	2.21806	2.2513	3.24377	2.44186	2.79575	2.39332	2.93437	2.64132	2.86039	4.19942	2.67331	2.40746	3.03515	3.65491	4.43073	5.88689	9.09537
AAEL007547	40.0334	58.3336	44.8742	41.4211	46.1656	54.7457	54.8355	44.2994	47.9786	50.4648	27.22	35.7153	37.8229	26.5228	31.8202	17.9294	18.9108	14.7833	19.8476	17.8678	19.8175	37.9403	18.2768	20.0199	24.0136	37.8876	52.5005	40.8051	45.0311	44.0561	48.0177	61.1733	45.8894	43.0379	49.5296	50.9531	64.3394	57.4764	51.0837	55.9632	88.8659	90.3248	104.117	108.918	98.0564	132.539	152.708	113.418	104.447
AAEL009295	5.71528	8.28768	5.315	5.53218	6.21253	6.45387	6.47794	11.3432	8.20333	8.11958	5.229	5.37919	4.05942	5.67426	5.08547	5.14924	3.29891	3.3545	3.25617	3.7647	4.45353	6.40728	3.31429	4.58953	4.69116	10.5394	12.2145	9.03013	9.12755	10.2279	7.5891	8.82647	6.5015	6.63766	7.38868	5.76611	11.3503	9.2283	7.03957	8.34607	10.4188	14.043	12.7811	14.5825	12.9563	19.572	21.9861	16.6945	17.6032
AAEL024970	0.525987	0.661361	0.853258	0.652701	0.673327	1.12432	0.179742	0.638899	0.587548	0.632627	0.778504	0.356824	0.363681	0.388644	0.471913	0.551677	0.246381	0.29801	0.260037	0.339026	0.095621	0.190851	0.204607	0.121945	0.153256	0.327281	0.337658	0.212231	0.199645	0.269204	0.499323	0.470132	0.860797	0.416965	0.561804	0.233784	0.260558	0.826995	0.255021	0.394089	0.469922	0.372734	0.502048	0.506428	0.462783	0.539864	0.178866	1.35022	0.626777
AAEL020646	0.21607	0.203474	0.205598	0.263954	0.222274	0.075909	0.110517	0.248945	0.211534	0.161726	0.087665	0	0.050764	0	0.0346072	0.167663	0.031756	0	0.05641	0.0639572	0.058915	0	0.066266	0.092568	0.0544372	0.161306	0.075627	0.181359	0	0.104573	0.100159	0.201997	0	0.084998	0.0967885	0.066485	0.131502	0.192765	0.201641	0.148098	0.397679	0.225153	0.297717	0.829551	0.437525	0.877755	0.339307	0.462598	0.192486
AAEL021394	9.4289	9.24638	8.79891	10.5314	9.50141	10.4887	9.58656	9.80516	9.83376	9.92855	5.11825	4.61862	4.16212	4.56582	4.6162	5.46828	5.52798	2.2857	4.75727	4.50981	6.08922	7.05982	4.89616	6.1103	6.03887	6.43776	10.1268	6.2707	6.3388	7.2935	9.17259	9.13322	6.18462	7.80467	8.07378	7.95057	7.47997	7.76999	8.04189	7.8106	12.5258	12.0412	11.037	13.4341	12.2595	16.638	20.7468	16.418	18.7297
AAEL009291	7.61013	10.9337	2.91602	2.61831	6.01953	9.45343	5.83521	5.21375	4.15896	6.16534	6.57055	3.84786	3.58791	3.80313	4.45236	6.15096	4.39286	3.58333	3.8147	4.48546	6.67619	8.93821	4.97258	4.803	6.3475	10.5333	8.74141	8.92581	9.01527	9.30396	13.4919	24.8925	14.6931	17.7581	17.7089	21.9369	18.081	14.8975	15.7077	17.6558	28.3634	34.9301	26.9046	26.2765	29.1186	27.0525	40.1419	31.6977	26.6223
AAEL009303	4.87816	6.81901	5.81318	4.6041	5.52861	6.66383	5.79922	5.28745	5.23721	5.74693	2.28089	3.47091	2.32748	2.55507	2.65859	2.84423	3.71712	3.28237	2.29698	3.03518	2.21297	2.88296	2.59174	1.52612	2.30345	2.7837	3.52929	2.2005	2.50734	2.75521	2.41767	2.69159	2.11285	2.76458	2.49668	3.82474	3.46657	2.72151	3.1779	3.29768	7.03821	6.21117	8.68128	7.46142	7.34802	24.2495	17.1074	20.7809	17.468
AAEL009288	11.7792	13.4462	10.7388	9.39345	11.3394	15.2434	15.9723	12.6319	15.1657	14.7533	16.1524	19.6521	17.7204	16.8035	17.5821	22.8908	21.9162	25.8688	23.8793	23.6388	31.6496	29.2048	31.7983	30.9322	30.8962	19.6555	24.0854	25.6857	19.956	22.3457	10.2114	17.5626	12.7375	11.1229	12.9086	11.9424	15.7562	9.71344	8.29275	11.4262	15.2703	16.2137	14.4084	15.0025	15.2237	37.6415	29.1607	33.693	34.3782
AAEL009296	0.26724	0.222922	0.284811	0.343221	0.279548	0.362122	0.125885	0.003423	0.34722	0.209662	0.134183	0.199754	0.121941	0.386317	0.210549	0.506471	0.221558	0.064267	0.387768	0.295016	0.365232	0.029968	0.480366	0.430447	0.326503	0.126092	0.139006	0.217001	0.267178	0.187319	0.314236	0.215152	0.23604	0.122318	0.221937	0.129408	0.130635	0.096388	0.085329	0.11044	0.169845	0.29087	0.13834	0.085139	0.171048	0.28968	0.363504	0.584104	0.769876
AAEL009284	1.73261	3.47693	2.13736	1.73396	2.27022	1.5077	2.36855	2.55987	0.585865	1.7555	3.28334	3.49069	2.65857	2.51872	2.98783	2.7318	2.56923	2.9769	3.18132	2.86481	2.28455	2.35584	1.59818	1.31153	1.88753	1.80594	3.22467	2.13298	2.63542	2.44975	4.75897	4.84164	3.13748	2.89911	3.9093	3.21394	4.54783	2.35044	2.88198	3.24855	5.47626	4.98099	3.89242	3.39906	4.43718	7.61558	10.4415	8.46219	5.89234
AAEL015402	1.91723	2.25322	2.17841	1.38041	1.93232	1.61544	1.73521	1.89763	1.47452	1.6807	2.10358	2.27557	1.98489	2.12495	2.12225	1.94555	2.4822	2.72306	2.45828	2.40227	1.39171	2.03316	1.53255	1.70088	1.66457	1.41101	1.51989	1.84049	1.64877	1.60504	2.71698	1.73738	2.58707	2.24793	2.32234	2.4368	2.74533	2.22232	3.05559	2.61501	4.17587	4.23666	4.69623	4.9337	4.51062	6.9368	5.43945	5.77957	5.33617
AAEL023463	1.53033	2.0319	0.889988	0.634011	1.27156	1.96306	1.16375	0.88837	1.19355	1.30218	0.448366	1.90911	0.566408	1.20992	1.03345	0.531472	0.161804	0.781264	0.917209	0.597937	0.690082	1.22645	1.01365	0.655218	0.896348	1.99303	1.23463	1.09663	2.30213	1.65661	2.37099	0.835731	1.34029	2.5241	1.76778	2.12009	2.03525	1.61191	2.24494	2.00305	1.49575	2.97282	1.17142	2.51038	2.03759	2.51923	2.01297	3.14738	3.13771
AAEL025157	1.05144	1.83947	2.2676	1.44908	1.6519	0.813956	1.22999	0.97021	1.52034	1.13363	0.970898	0.842118	0.613246	0.412868	0.709782	0.958623	0.203188	0.237416	0.295891	0.423779	0.47959	0.464105	0.997897	0.281913	0.555876	0.431291	0.487032	0.746737	0.804942	0.617501	0.43507	0.067329	0.400284	0.16925	0.267983	0.211956	0.636677	0.332232	0.367452	0.387079	1.24145	0.609422	1.75084	1.15817	1.18997	4.4692	0.901501	1.99549	0.271024
AAEL020424	0	0.37074	0.837798	0.517132	0.431417	0.755811	0	0.279285	0.497902	0.38325	0.418427	0.177841	0.079964	0	0.169058	0.542927	0	0	0.224662	0.191897	0.090943	0	0.383926	0.105797	0.145167	0.346269	0.23154	0	0.294586	0.218099	0.50931	0.320106	0.397023	0.266941	0.373345	0.22827	0.285813	0.101772	0	0.153964	0.045574	0.434796	0.208573	0.51983	0.302193	0.780362	1.268	0.523584	0.438359
AAEL025860	4.53877	8.09993	8.67816	5.15352	6.61759	5.33414	4.18923	6.75673	6.71149	5.7479	3.12066	2.95925	2.9487	2.93271	2.99033	2.18463	1.83596	2.03475	1.47619	1.88288	2.57111	3.35904	2.37735	2.75696	2.76612	3.9551	2.91733	3.64321	3.48607	3.50043	2.81218	2.17441	3.74213	2.61698	2.83643	2.89923	4.14683	2.75643	3.14739	3.23747	5.75454	4.92459	7.60449	6.63228	6.22898	12.9014	8.11121	9.69875	6.55765
AAEL009285	12.7134	15.2028	11.4851	12.8126	13.0535	16.8562	13.5678	16.797	15.6769	15.7245	29.6397	32.4226	33.6088	35.0355	32.6767	31.638	32.0901	37.5941	26.357	31.9198	15.8057	21.6897	19.2267	9.54862	16.5677	5.62728	11.1009	4.44964	3.03546	6.05332	2.38767	6.32352	2.52863	2.20072	3.36013	2.78995	4.56137	2.93383	3.33707	3.40556	7.32985	6.8673	8.92212	12.8772	8.99911	42.7383	34.0058	50.9768	62.0766
AAEL028148	2.2256	2.84658	2.41551	2.61521	2.52572	2.01794	2.21114	1.94223	2.57924	2.18764	2.31494	2.15368	1.77943	2.32222	2.14257	2.37352	2.61288	1.88945	2.21413	2.2725	1.96552	2.72543	2.29057	2.37283	2.33859	2.12701	2.87095	1.85866	1.82077	2.16935	2.11565	2.0992	2.22256	1.96905	2.10161	2.41148	2.33577	2.12538	2.26198	2.28365	4.74159	4.13679	4.81106	4.65006	4.58488	4.41737	5.0693	4.6551	5.57716
AAEL009294	4.86562	6.33229	5.49545	5.04032	5.43342	5.70662	4.55301	5.81204	5.29357	5.34131	4.47381	3.89668	3.3868	4.37591	4.0333	5.93228	4.96512	2.99655	3.77236	4.41657	5.17879	5.58723	4.7806	5.74887	5.32387	5.07568	6.1668	4.23266	5.28963	5.19119	8.52696	6.07785	6.3387	7.41058	7.08852	9.27825	6.14234	7.5144	8.8967	7.95792	10.5334	8.7758	9.4202	8.18861	9.2295	8.35689	8.23782	6.86008	8.21089
AAEL021377	0	0	0	0	0	0	0	0	0	0	0	0	0	0	0	0.027386	0	0	0	0.0068465	0	0	0	0	0	0	0	0	0	0	0	0	0	0	0	0	0	0	0	0	0	0	0	0	0	0	0	0	0
AAEL020125	0	0.126759	0.029799	0	0.0391395	0.067325	0	0.029609	0	0.0242335	0	0.125633	0.147324	0	0.0682393	0.029957	0	0.036406	0.012468	0.0197077	0	0	0	0	0	0.116313	0.083326	0	0.110639	0.0775695	0	0	0.067921	0.115454	0.0458438	0.074381	0.214885	0.115757	0.063225	0.117062	0.189393	0.139672	0.065653	0	0.0986795	0.204691	0.347008	0.062246	0.044075
AAEL009287	124.686	148.37	121.262	120.196	128.628	150.689	123.351	138.046	127.572	134.915	181.553	194.867	192.888	186.947	189.064	186.835	183.5	189.833	163.807	180.994	144.664	168.431	180.785	129.017	155.724	89.7055	119.171	102.475	72.5808	95.9831	48.9688	76.7329	53.6078	46.5465	56.464	47.1179	71.047	50.231	36.1768	51.1432	71.8483	88.465	93.8505	113.06	91.8061	350.083	269.178	330.191	408.112
AAEL009298	5.68167	6.62413	5.9609	5.64427	5.97774	5.9605	5.65499	5.03206	4.83873	5.37157	6.73625	5.18429	4.85211	5.44568	5.55458	7.60353	5.89208	6.83765	6.90108	6.80858	7.19884	6.84671	6.64118	9.88798	7.64368	29.1285	14.6995	30.3232	22.1668	24.0795	15.2979	15.8196	13.3509	14.9043	14.8432	11.9843	12.077	13.1098	10.3316	11.8757	9.82125	11.7547	8.47224	8.12832	9.54414	10.9404	9.4876	9.97166	7.48733
AAEL009282	4.1714	3.06711	2.87218	2.52727	3.15949	3.3908	3.60814	3.21574	3.66006	3.46868	3.6563	3.45038	3.30134	4.94044	3.83711	4.00544	3.86027	3.62414	3.07991	3.64244	3.21605	3.7356	2.53352	4.01797	3.37578	3.31964	3.78338	3.8312	3.95952	3.72343	4.57808	4.31914	3.80329	3.99152	4.17301	3.42088	3.62273	4.02464	3.70384	3.69302	6.45814	4.98187	6.45303	8.47218	6.5913	10.8255	8.85946	10.8156	8.8387
AAEL009302	6.46574	10.3651	6.19591	5.88108	7.22697	9.29824	8.36332	7.39946	6.71881	7.94496	10.3508	10.6134	9.28308	11.3276	10.3937	11.1404	14.0457	10.496	10.2382	11.4801	10.8224	12.3248	9.55575	11.0671	10.9425	13.8505	14.8344	13.1903	11.0513	13.2316	11.4445	11.5683	11.2135	11.4797	11.4265	10.8862	15.3878	11.9268	10.4496	12.1626	18.8712	21.5875	16.0419	20.6354	19.284	25.2527	26.0122	22.533	26.3886
AAEL025049	9.47101	12.9893	6.80637	7.44095	9.17691	11.6375	11.0125	8.66933	9.92175	10.3103	10.2555	5.50346	7.72039	9.08431	8.14091	10.9003	7.54137	5.79132	6.06219	7.5738	6.84768	9.87856	6.94163	8.69242	8.09007	11.0652	13.4076	10.2553	9.98563	11.1784	14.2723	14.1894	11.7704	11.4157	12.9119	13.3499	14.5409	11.404	10.2242	12.3797	17.9982	19.5756	18.3157	20.0454	18.9837	28.3449	26.7313	24.1452	21.251
AAEL012658	74.2431	83.3258	72.1786	73.5279	75.8188	84.387	81.1995	73.764	70.1272	77.3694	132.643	135.305	130.841	140.89	134.92	116.751	128.04	125.212	126.214	124.054	119.143	111.372	115.022	83.9422	107.37	68.205	73.2694	62.9254	65.1267	67.3816	98.5858	87.0255	78.388	90.5144	88.6284	102.467	99.1422	104.82	109.325	103.939	155.911	143.384	139.881	146.619	146.449	150.641	118.476	116.838	128.55
AAEL012654	0.125368	0.083876	0.11434	0.036507	0.0900227	0	0	0	0.05743	0.0143575	0.023209	0.181149	0.093459	0.021436	0.0798133	0	0.205983	0.021824	0	0.0569518	0	0.04162	0.022144	0.0711	0.033716	0.021124	0.080939	0.021888	0.044248	0.0420497	0.27826	0.082092	0.060248	0.192226	0.153206	0.119533	0.087342	0.05214	0.195791	0.113701	0.231018	0.206139	0.177404	0.427346	0.260477	0.290832	0.253935	0.107569	0.296454
AAEL012659	0	0.044222	0	0	0.0110555	0	0	0.096802	0	0.0242005	0	0	0	0	0	0	0	0	0	0	0	0	0	0	0	0	0	0.086727	0	0.0216817	0	0	0	0	0	0	0	0	0.045291	0.0113227	0.197365	0	0.063099	0.146358	0.101706	0.110239	0	0	0.156417
AAEL012660	3.29975	4.11158	2.19534	4.18047	3.44679	3.49062	4.50489	3.31795	3.37511	3.67214	3.82202	3.85383	3.02062	3.3185	3.50374	2.27928	2.77926	2.65015	2.62658	2.58382	2.46949	2.6935	2.88555	1.50648	2.38875	3.29399	2.60619	2.61771	2.72673	2.81116	2.81216	2.77325	2.71601	2.60659	2.727	3.9251	2.74416	3.66648	2.43111	3.19171	4.99816	4.34737	6.09836	5.09753	5.13535	9.68876	7.64166	8.50753	9.16635
AAEL012656	5.52249	5.98275	4.27542	5.27721	5.26447	5.45243	5.16421	6.13346	5.68541	5.60888	12.42	13.7916	13.2592	10.455	12.4815	13.6208	11.4483	16.6366	12.1075	13.4533	11.1095	8.51039	9.52468	9.03753	9.54552	7.09086	10.4113	8.24551	7.33124	8.26973	4.66256	5.86352	4.69447	6.35684	5.39435	4.24248	5.79094	4.20653	2.72582	4.24144	4.42159	4.69923	3.64711	4.57403	4.33549	15.3901	12.4617	14.8182	15.5534
AAEL012661	177.18	195.18	169.625	162.935	176.23	205.602	167.45	188.635	171.125	183.203	193.102	191.878	198.907	200.802	196.172	202.696	230.24	224.66	208.039	216.409	187.839	212.561	220.298	183.015	200.928	128.308	167.713	142.557	118.133	139.178	139.091	152.356	145.79	139.203	144.11	169.771	168.499	166.741	162.801	166.953	251.589	248.976	268.122	269.932	259.655	397.7	354.435	389.667	408.287
AAEL019597	29.8544	27.2513	25.4571	29.3916	27.9886	32.4184	27.6566	33.0093	30.0933	30.7944	14.8233	13.7561	8.21886	26.9738	15.943	92.7292	100.996	56.4951	88.0345	84.5637	134.371	82.4315	133.292	125.178	118.818	60.3307	82.0641	66.4498	62.4682	67.8282	77.5768	67.0813	81.2993	76.3685	75.5815	95.7774	84.2725	104.386	100.057	96.1231	101.971	87.9168	103.257	95.0599	97.0511	74.076	83.3463	87.7886	65.0698
AAEL020923	0.150128	0.11414	0.162833	0.240654	0.166939	0.159296	0.267041	0.092734	0.097025	0.154024	0.117605	0.090217	0	0	0.0519555	0.050154	0.08732	0	0.11633	0.063451	0.128142	0	0.028875	0.106135	0.065788	0.173337	0.042676	0.119724	0.171496	0.126808	0.115834	0.042193	0	0.094149	0.063044	0.104107	0.092326	0.221357	0.0992	0.129247	0.27239	0.188044	0.315078	0.706117	0.370407	0.418106	0.398007	0.496014	0.472477
AAEL008489	5.06637	6.67237	4.02771	4.03844	4.95122	3.83104	3.59253	4.71264	3.70594	3.96053	4.24093	4.47232	3.85953	4.59546	4.29206	5.01858	3.73406	4.43673	3.61497	4.20109	5.18476	5.3948	3.87884	3.19603	4.41361	6.60981	7.53126	5.58383	5.48684	6.30294	5.25999	10.3391	7.74896	7.19466	7.63567	6.97084	9.21339	6.31233	6.2717	7.19206	15.9313	19.2118	21.1165	20.1353	19.0987	18.2038	16.5206	23.6531	12.1049
AAEL008478	51.8883	53.5641	51.2359	58.9027	53.8977	54.5933	52.3513	41.6825	52.9374	50.3911	45.7965	53.5132	37.0704	46.0079	45.597	76.0781	83.9489	61.1252	89.5402	77.6731	134.475	117.019	149.211	191.97	148.169	180.084	157.006	191.839	154.078	170.751	167.998	138.937	160.661	179.022	161.655	251.742	162.618	228.796	273.097	229.063	188.503	189.068	162.393	164.936	176.225	78.9501	109.079	97.3043	66.415
AAEL008485	0.265379	0.591174	0.242845	0.587813	0.421803	0.094214	0.538505	0.116945	0.181019	0.232671	0	0	0	0.195543	0.0488857	0	0	0	0.086121	0.0215303	0	0	0.300531	0	0.0751327	0	0	0.134585	0.54555	0.170034	0.667422	0.833336	0.772369	1.12787	0.850249	1.35081	0.554026	0.908255	1.34376	1.03921	4.78634	2.40421	2.32642	7.0631	4.14502	0.311617	0.340813	0.188917	0
AAEL027384	2.67134	2.50147	2.18536	2.40452	2.44067	3.03002	1.97909	1.29574	2.13104	2.10897	1.20233	1.0889	1.2758	1.26643	1.20837	1.20352	1.05088	0.695977	0.693709	0.911019	1.21018	1.17524	1.25366	1.54062	1.29493	1.67875	2.22095	1.55468	1.77448	1.80722	3.38734	2.63824	2.1254	2.72975	2.72018	3.08752	2.33286	3.19009	2.76249	2.84324	3.8208	3.59391	3.88212	4.66181	3.98966	5.54561	5.41178	4.96647	5.48752
AAEL008469	20.5739	25.0482	23.3369	21.9556	22.7287	22.706	22.602	21.3822	21.2618	21.988	25.5066	28.5398	28.325	26.5888	27.24	22.5792	24.9929	31.9571	29.2069	27.184	19.1908	28.0243	28.7078	20.383	24.0765	11.2495	19.7132	11.8048	9.66343	13.1078	6.73839	11.9192	9.60056	8.07584	9.0835	8.07028	13.6784	8.74748	6.96644	9.36564	12.6063	14.1061	17.2115	20.94	16.216	69.8088	57.6678	78.5269	103.275
AAEL008490	94.896	101.629	89.3626	85.2113	92.7748	94.7408	91.5581	90.4487	88.3428	91.2726	88.8336	91.3327	84.2872	94.2065	89.665	93.4393	95.4153	100.67	95.9568	96.3705	119.461	120.105	134.457	127.167	125.297	123.577	136.993	143.162	128.519	133.063	99.6495	131.314	93.9106	95.6664	105.135	73.4431	98.7881	78.9974	60.7031	77.9829	84.082	86.2298	91.4236	85.8578	86.8983	138.378	134.82	144.516	173.746
AAEL008475	5.6829	6.27014	5.3475	5.41894	5.67987	5.924	6.11673	5.07221	5.63931	5.68806	5.68698	5.87983	5.9204	6.32651	5.95343	4.58091	4.27717	2.6785	3.61497	3.78789	5.14531	5.23401	4.97573	4.82545	5.04513	3.76987	4.88235	3.59465	3.06154	3.82711	4.69939	4.68242	4.23924	3.9792	4.40006	3.97731	4.61952	3.98481	4.33361	4.22881	5.69786	6.5104	6.29381	7.62592	6.532	10.2199	9.84014	9.64837	11.7673
AAEL008480	0.407133	2.92658	1.95529	1.88173	1.79268	2.17198	1.89902	1.94838	1.89173	1.97778	3.36136	3.00419	2.94491	2.82514	3.0339	1.92283	2.21037	1.41476	1.8453	1.84831	1.7468	2.2392	1.94392	1.23988	1.79245	2.42412	2.30364	1.91972	1.64289	2.07259	2.25529	1.96814	1.70173	2.03876	1.99098	1.68722	2.62041	1.70054	1.48199	1.87254	3.70628	2.98479	3.71954	3.72347	3.53352	1.3686	4.70984	1.37891	5.07465
AAEL008486	16.9649	22.4697	16.1977	16.3716	18.001	20.9235	18.7364	15.9271	16.626	18.0532	16.602	17.3548	15.0502	17.6468	16.6634	18.0436	17.6482	16.7788	15.7253	17.049	20.4203	24.7307	20.5271	21.518	21.799	24.7434	27.3995	26.9452	31.5708	27.6647	22.7822	25.082	23.0824	25.328	24.0687	21.3892	26.3977	22.8301	21.4022	23.0048	22.4219	23.2689	19.2161	20.1315	21.2596	22.6014	24.5106	28.1899	24.9233
AAEL008491	9.23857	11.039	10.1076	9.10835	9.87338	11.247	12.6904	8.22517	9.40893	10.3929	6.18482	6.60899	6.06391	7.4589	6.57915	6.75113	9.46973	6.72671	6.87183	7.45485	7.51773	10.2295	7.58084	8.94056	8.56715	14.9182	14.005	15.0131	15.4578	14.8485	15.5002	14.6865	12.4988	13.9326	14.1545	12.0075	13.9559	13.5385	13.219	13.1802	17.9125	20.8045	19.1706	21.9017	19.9473	23.658	31.7251	24.851	22.5577
AAEL008476	2.62407	2.69889	2.79076	2.31962	2.60834	2.7962	3.30992	1.41432	2.11654	2.40925	1.61919	2.01862	1.67395	1.97239	1.82104	1.78008	2.50274	1.53819	2.19984	2.00521	3.23661	1.45791	2.07441	1.8849	2.16346	2.97285	2.58841	2.36759	2.54905	2.61948	2.53663	2.61393	2.0599	2.11804	2.33213	2.93013	2.30923	2.69065	3.74299	2.91825	4.20764	3.95824	4.29624	4.59201	4.26353	5.29886	4.64708	7.08981	3.90603
AAEL008481	3109.95	3466.26	3362.43	3517.66	3364.08	3337.02	3519.79	3444.5	3468.41	3442.43	2756.5	3052.16	3097.03	2817.79	2930.87	2598.69	2818.88	3141.26	2817.27	2844.02	2451.45	2864.58	3003.5	2564.32	2720.96	2204.87	2652.58	2630.77	2406.04	2473.57	2299.58	2500.39	2588.4	2415.11	2450.87	2354.27	2637.46	2479.04	2588.94	2514.93	2347.6	2301.64	2666.9	2497.8	2453.49	3665.53	3299.59	3749.33	4163.94
AAEL008472	0.845364	1.22718	0.930303	1.34418	1.08676	1.35536	1.11824	0.808753	0.691529	0.99347	0.679585	0.581014	0.856065	0.399031	0.628924	0.860305	0.167403	0.331506	0.757574	0.529197	0.165296	0.546472	0.356236	0.46941	0.384354	0.814985	0.786347	0.854954	0.893022	0.837327	1.57421	1.56564	1.88818	1.43955	1.61689	1.45215	1.72903	1.93128	1.92538	1.75946	3.76381	2.52505	3.293	4.90309	3.62124	5.50179	4.99967	4.09433	5.36536
AAEL023300	0.081618	0.032918	0.035241	0.095928	0.0614263	0.015756	0	0	0.020803	0.00913975	0.090508	0	0	0	0.022627	0	0	0	0	0	0	0	0.043105	0.030153	0.0183145	0	0.095249	0	0.040323	0.033893	0.052105	0	0.06354	0.031792	0.0368592	0	0.035104	0	0.167328	0.050608	0	0.050644	0	0.042533	0.0232942	0.081601	0.10322	0.255048	0
AAEL027779	6.51227	6.67569	5.90759	5.70386	6.19985	7.2645	6.12221	6.27085	6.22014	6.46942	10.225	11.9248	11.7383	10.834	11.1805	11.3387	8.53112	11.793	10.7427	10.6014	11.4285	9.33764	13.0633	13.1593	11.7472	8.04221	8.71939	12.0038	6.61513	8.84513	1.75634	5.31259	2.57541	3.13975	3.19602	1.76128	3.79313	2.06821	1.46756	2.27255	2.88875	4.15446	3.26175	4.15731	3.61557	10.0532	10.1227	12.4831	10.6703
AAEL008482	2.88714	3.54885	2.66455	2.41627	2.8792	4.08117	2.9588	3.14509	2.61776	3.20071	4.62525	4.52305	4.73236	4.39431	4.56874	3.50885	4.20765	3.16636	3.83319	3.67901	3.42222	4.94876	4.40419	3.75082	4.1315	3.01069	5.09726	4.09316	2.26402	3.61629	1.18167	2.49444	1.16863	0.889316	1.43351	1.04521	2.4613	0.687721	0.891397	1.27141	1.28271	3.09018	1.30839	2.24014	1.98036	5.32306	6.71514	4.59552	6.66537
AAEL008473	10.0364	31.9893	6.02055	5.79843	13.4612	20.3306	19.3534	12.7836	12.5448	16.2531	11.2113	12.4541	11.6312	9.11334	11.1025	17.7458	6.12181	3.66771	11.2936	9.70725	3.97558	30.2651	7.10642	7.61109	12.2395	29.6818	37.5747	26.584	29.6684	30.8772	56.7354	61.8293	48.1403	49.7019	54.1017	61.4211	89.143	68.1592	57.6986	69.1055	129.76	138.984	107.997	138.133	128.718	219.749	162.163	96.3108	63.0726
AAEL008488	0.749168	0.779362	0.355664	0.261752	0.536486	0.404682	0.391211	0.474582	0.487112	0.439397	0.095873	0.124984	0.082384	0.137298	0.110135	0.129332	0.214937	0.092981	0.21574	0.163247	0.048999	0.450348	0.094979	0.083719	0.169511	0.690885	0.939987	0.606061	1.31888	0.888952	1.56613	1.67332	1.73522	2.0831	1.76444	1.27184	2.45022	1.45415	1.54093	1.67929	3.70603	3.16608	4.71837	5.3451	4.2339	5.2569	4.65867	8.24486	2.99577
AAEL008471	7.53904	6.69639	6.69015	8.43506	7.34016	8.83632	7.29294	10.9568	8.92201	9.00202	19.0078	18.3626	19.2174	19.7515	19.0848	13.2166	11.8556	9.39907	13.1348	11.9015	23.1787	14.7484	19.805	29.171	21.7258	23.2196	19.0145	21.1656	22.1231	21.3807	15.9113	14.675	15.0271	14.4199	15.0083	15.8822	14.5573	15.1805	17.1639	15.696	16.7193	17.3921	15.8734	21.8118	17.9492	20.6698	16.0152	23.5209	16.6346
AAEL008916	0.712757	0.209031	0.281929	0.58709	0.447702	0.643945	0.365811	0.443232	0.374888	0.456969	0.335207	0.521842	0.366193	0.232423	0.363916	0.426888	0.305455	0.073093	0.226793	0.258057	0.204355	0.212369	0.031354	0.105045	0.138281	0.081374	0.182351	0.075065	0.283268	0.155514	0.858619	0.373186	0.319459	0.419586	0.492712	0.863476	0.20558	0.631067	0.686125	0.596562	1.27349	0.621469	1.11105	1.03743	1.01086	1.91777	1.08483	1.18592	1.41323
AAEL001543	4.6347	4.16108	3.77661	3.5833	4.03892	5.35915	3.37075	2.87381	3.55618	3.78997	2.13472	1.08886	1.41381	1.58145	1.55471	1.87867	2.00448	2.15119	1.95096	1.99633	1.87064	1.95919	2.23406	3.14491	2.3022	6.52793	4.40459	5.9299	3.82409	5.17163	8.04391	5.57439	6.85374	5.94783	6.60497	8.33872	4.88905	7.83506	7.69885	7.19042	1.05038	8.30383	12.22	13.1986	8.69319	11.735	10.277	10.7495	8.2758
AAEL001541	10.4568	12.6072	10.0131	12.0376	11.2787	11.6794	12.0966	9.12219	10.7152	10.9034	14.4236	14.6996	13.6371	18.6552	15.3539	17.5514	19.1454	15.0214	15.4093	16.7819	13.6399	13.4605	13.0705	12.8187	13.2474	7.46709	9.68965	7.72966	8.99374	8.47003	7.76352	10.4494	8.21234	8.72829	8.78839	8.60878	10.4679	9.69534	9.31085	9.52073	12.7435	12.5431	12.4506	13.62	12.8393	20.8022	19.7768	19.9243	19.3186
AAEL001549	22.0942	25.8476	20.3733	23.9908	23.0765	26.0325	23.6565	22.1562	19.6742	22.8799	14.7331	14.2898	15.0009	14.1576	14.5454	16.319	13.6451	8.72911	11.0981	12.4478	14.9439	19.6353	14.1762	11.8967	15.163	14.0362	19.7522	10.6086	10.3524	13.6873	17.5193	17.8799	14.9338	16.5075	16.7101	22.531	21.0306	19.086	20.4606	20.7771	43.2496	39.6289	37.4144	45.6663	41.4898	65.357	64.349	48.366	50.1314
AAEL001548	49.5285	66.4995	39.9425	46.568	50.6346	67.8324	53.0442	50.3271	48.9704	55.0435	47.7128	72.5424	90.9313	56.7241	66.9776	56.0759	70.781	61.362	57.3376	61.3891	74.8043	92.9533	81.7101	92.3486	85.4541	115.339	191.326	163.935	190.363	165.241	138.324	193.468	194.985	162.023	172.2	177.596	184.695	178.447	188.477	182.304	241.67	180.915	251.124	287.895	240.401	163.651	179.278	126.542	130.756
AAEL001586	11.5094	17.445	10.4809	12.039	12.8686	14.0835	14.9931	9.80625	11.2893	12.543	5.60694	8.533	10.3924	9.26715	8.44988	9.70954	15.8678	10.4811	16.0856	13.036	19.0721	19.6752	24.3812	33.6203	24.1872	37.8364	68.5198	68.8493	72.5346	61.935	46.2831	66.6916	68.1393	53.9929	58.7767	50.1472	64.3158	54.8829	57.0421	56.597	56.5521	51.7489	69.0606	79.9624	64.331	18.5683	39.7445	29.1549	25.027
AAEL020603	0.22163	0.1781	0.168488	0.081156	0.162344	0.187828	0.160619	0.345538	0.191356	0.221335	0.196879	0.125248	0.168433	0.11324	0.15095	0.077671	0.096332	0.072603	0.140545	0.0967878	0.025307	0.136474	0.069892	0.029253	0.0652315	0.151924	0.14123	0.070626	0.179569	0.135837	0.073874	0.120986	0.181711	0.374211	0.187695	0.187252	0.246379	0.293718	0.322765	0.262528	0.299208	0.259531	0.490246	0.633391	0.420594	0.576962	0.605831	0.4011	0.493496
AAEL027353	1.00518	0.822917	0.519762	0.85841	0.801567	0.445498	0.312404	0.366719	0.487024	0.402911	0.525495	0.463838	0.609871	0.673366	0.568142	0.712514	0.53314	0.522903	0.635239	0.600949	0.979147	0.737451	0.508957	0.930491	0.789011	0.861025	1.09919	1.01741	0.936088	0.978427	0.768674	0.884478	0.665298	0.80498	0.780857	0.86847	1.02617	0.74643	0.916869	0.889486	1.44993	0.582161	1.32331	1.21162	1.14176	0.797767	1.50319	2.18368	2.04793
AAEL001556	0.132453	0.224851	0.067237	0.444306	0.217212	0.31059	0.151409	0.46704	0.165993	0.273758	6.2461	5.9815	0.115518	0.1411	3.12105	0.020079	5.1582	0.251083	4.52946	2.48971	5.89787	6.68277	0.448955	0.173071	3.30067	5.3079	7.15141	0.579111	4.77174	4.45254	0.493693	0.135982	0.525012	9.19524	2.58748	0.436856	0.436538	12.4037	0.277449	3.38865	19.5904	0.104186	0.605092	0.172368	5.11801	21.4602	0.456625	0.682539	0.738611
AAEL001582	3.45439	2.48205	1.95254	2.41699	2.57649	3.54214	1.93956	2.1057	2.21998	2.45185	1.85462	1.99393	1.61075	1.80808	1.81685	2.75118	2.25778	0.805389	2.06967	1.971	3.36069	3.30504	2.6952	2.21821	2.89478	3.84231	4.61488	2.53753	2.96385	3.48964	5.96671	3.64327	3.86389	4.39219	4.46651	5.24877	3.26318	3.43501	3.99935	3.98658	6.73629	5.2863	4.85909	4.88919	5.44272	6.03569	5.50816	3.29681	5.16527
AAEL001593	51.838	51.0211	47.4089	51.9337	50.5505	54.603	48.3099	49.4669	46.0433	49.6058	21.5411	22.7366	22.7964	23.0293	22.5259	37.9524	41.7259	21.7774	51.6162	38.268	72.2861	73.4589	86.7574	136.55	92.263	117.421	107.546	99.7048	125.575	112.562	112.173	130.323	82.4574	96.446	105.35	66.4836	73.3217	85.2641	69.2783	73.5869	91.6094	76.6917	114.717	126.288	102.327	210.208	149.531	206.297	178.302
AAEL001562	5.36055	5.25163	5.60647	4.99112	5.30244	6.46932	4.97238	4.47919	5.12966	5.26264	4.16548	4.66063	6.2308	5.52213	5.14476	5.1424	4.82491	4.32791	5.02544	4.83017	2.3191	4.76074	3.9652	3.81846	3.71587	6.74128	6.46403	7.28169	6.17355	6.66514	7.41822	6.20306	6.96719	5.84383	6.60807	8.21969	6.72088	7.6071	7.1716	7.42982	10.5236	8.8982	10.4043	11.3505	10.2942	11.3343	11.1343	13.1932	10.1792
AAEL019546	20.0602	24.6959	18.7892	19.7378	20.8208	25.6493	21.9468	28.5215	23.7365	24.9635	15.2838	16.459	20.3968	15.2185	16.8395	15.4345	14.3482	12.2335	11.7754	13.4479	14.9573	16.2478	14.6018	14.9776	15.1961	21.434	23.7845	19.9453	21.1907	21.5886	28.8597	25.1152	25.5628	22.9478	25.6214	30.5353	29.2394	28.1184	27.825	28.9295	58.6639	49.9699	58.3943	77.3013	61.0823	87.3989	75.2893	63.321	67.5594
AAEL001564	1.92491	1.59114	1.51015	1.38937	1.60389	2.23899	1.46233	1.66573	2.66677	2.00846	1.18394	1.04394	1.10192	1.07682	1.10166	1.09586	2.34425	1.8987	1.826	1.7912	1.19373	1.34818	1.94859	1.12326	1.40344	1.24768	1.32108	1.27753	1.05774	1.22601	2.61941	1.74834	1.56316	2.34762	2.06963	3.14275	2.24666	2.52228	4.65428	3.14149	7.24398	6.26441	8.48046	10.6056	8.14861	14.2879	5.18452	6.75312	6.45932
AAEL001540	13.397	14.9146	11.4715	13.017	13.2	14.6016	14.8927	16.9233	14.4014	15.2047	7.71185	5.45395	7.98527	6.012	6.79077	6.13535	6.00053	4.38576	4.87765	5.34982	5.60755	9.10767	5.65638	7.40426	6.94397	9.8329	13.2978	8.52369	7.91203	9.8916	9.53066	9.63968	7.50191	8.73738	8.85241	10.3235	9.91267	8.73944	8.90912	9.47119	12.3027	13.6246	12.2024	11.9617	12.5229	18.0313	19.2631	17.5899	20.9459
AAEL001580	2.39246	4.51229	1.91662	2.18461	2.75149	5.33755	3.3747	1.80078	2.13918	3.16305	14.1159	16.4849	22.044	15.0754	16.93	10.0857	9.02006	11.599	7.64101	9.58643	6.47332	8.92777	6.17129	8.12895	7.42533	10.9796	13.6218	21.1207	7.79073	13.3782	3.84984	6.70414	4.79509	3.99073	4.83495	2.11102	5.72839	3.36098	2.81441	3.5037	3.22885	4.0161	3.55249	6.07435	4.21795	7.20466	7.83296	6.82368	6.90192
AAEL001583	4.85029	5.5292	3.99574	4.58176	4.73925	6.04707	4.06901	4.34834	5.70964	5.04352	2.64575	3.2638	3.30507	3.779	3.2484	3.77391	3.70072	1.6311	3.77905	3.2212	3.79374	4.28597	3.24576	4.12389	3.86234	5.58684	7.03672	5.87982	5.3703	5.96842	9.21766	7.1351	7.67034	7.68193	7.92626	10.4564	10.0208	10.7151	11.9983	10.7977	19.5996	18.0126	17.3196	18.2872	18.3047	21.1318	26.9927	15.9736	17.8087
AAEL009190	1.7076	2.16448	1.72111	2.13837	1.93289	1.95378	1.41441	1.39047	1.65738	1.60401	1.16942	1.76485	1.0618	1.15228	1.28709	1.66772	1.28475	1.05688	1.05162	1.26524	1.46907	1.71182	1.21438	1.78018	1.54386	1.93546	1.3722	2.17423	1.53049	1.7531	2.18373	1.75452	1.86825	1.36004	1.79163	2.57045	1.89309	2.01692	2.34244	2.20572	4.22386	4.26198	4.87241	4.66244	4.50517	6.18427	5.87346	4.4231	4.69544
AAEL001565	7.63145	10.711	4.18919	5.55247	7.02102	9.08515	7.03225	6.19285	6.13265	7.11073	5.85408	6.60441	6.8557	7.09869	6.60322	8.51118	6.75383	5.62181	5.76753	6.66359	5.94113	8.4104	6.54978	7.64069	7.1355	17.298	13.2853	15.1321	18.4611	16.0441	14.7482	14.0659	12.7966	10.9112	13.1305	13.0278	16.5745	15.4604	12.475	14.3844	20.1304	18.8239	16.8039	20.1183	18.9691	32.4406	31.2563	25.5075	25.3939
AAEL024628	1.30122	0.846168	1.73343	1.0162	1.22425	1.17032	1.20043	1.50091	1.00695	1.21966	1.0852	1.17701	1.12719	1.1295	1.12972	0.839632	1.06627	1.1701	0.913286	0.997324	1.06371	0.993937	1.57746	1.0892	1.18108	0.783734	1.04925	1.44406	1.34167	1.15468	1.4347	1.18171	1.33529	1.23839	1.29752	1.86513	1.29949	1.47567	1.6971	1.58435	3.45851	2.12093	3.08425	2.80517	2.86721	3.63624	3.32019	5.51949	3.95523
AAEL019617	3.60246	2.77902	2.12875	3.26343	2.94342	3.24834	2.68957	3.54549	3.24911	3.18313	1.09201	1.56813	0.898185	1.52089	1.26981	2.78364	2.76346	1.74248	2.62482	2.4786	3.66237	2.59445	3.33044	3.22586	3.20328	2.20951	1.92052	2.66265	2.71638	2.37726	6.26619	3.89678	3.69305	5.14831	4.75108	3.90454	3.09346	6.67729	4.74625	4.60538	5.44233	6.94055	7.63614	7.22533	6.81109	6.82582	5.60288	6.95521	5.11952
AAEL025434	0	0	0	0	0	0	0	0	0	0	0	0	0	0	0	0	0	0	0	0	0	0	0	0	0	0	0	0.166965	0.063276	0.0575603	0	0.063764	0	0.061877	0.0314103	0	0	0	0	0	0	0	0	0	0	0.068344	0	0	0
AAEL020046	0	0	0.097128	0	0.024282	0	0	0	0	0	0	0	0	0	0	0	0	0	0	0	0	0	0	0	0	0	0	0	0	0	0	0	0	0	0	0	0	0	0	0	0	0	0	0	0	0	0	0	0
AAEL001561	17.435	20.0103	13.4948	14.9604	16.4751	23.2451	18.0758	24.424	19.6537	21.3497	34.6929	32.3991	35.3948	32.6363	33.7808	28.7577	24.7392	18.2308	24.7651	24.1232	35.2166	34.5892	23.5906	42.7095	34.0264	66.1421	63.918	63.7377	71.8403	66.4095	65.3446	63.5587	59.5509	60.5344	62.2471	51.4884	52.6205	53.4458	55.0971	53.163	35.5134	43.7072	30.4844	34.8856	36.1476	26.8881	32.4926	27.7504	29.2168
AAEL001570	3.09559	1.86322	2.48268	2.64738	2.52222	3.56862	1.36591	2.28311	2.07212	2.32244	0.773533	0.737989	0.879337	0.829176	0.805009	0.831368	0.641407	0.46384	0.661544	0.64954	1.19528	1.09058	1.03704	1.19949	1.1306	1.87762	1.79095	1.98952	1.76277	1.85522	2.91658	2.60499	2.03336	2.05491	2.40246	3.28577	2.66084	2.7193	2.7809	2.8617	4.64091	4.19699	5.04626	5.21133	4.77387	5.94162	5.66294	5.41878	4.00036
AAEL001577	275.056	362.5	191.914	291.141	280.153	229.751	260.906	222.764	278.027	247.862	161.58	212.127	156.449	189.788	179.986	179.112	249.566	123.356	252.755	201.197	217.174	359.063	215.76	333.901	281.475	594.046	656.243	484.61	679.006	603.476	844.971	936.517	874.608	869.117	881.303	1096.69	1131.68	1260.8	1214.69	1175.97	1894.27	1968.03	2138.32	2428.75	2107.34	1861.83	2445.32	1857.06	1447.23
AAEL001544	6.61575	10.6869	6.14437	7.23689	7.67098	10.7661	8.78869	9.92671	8.89101	9.59313	9.38386	9.14913	10.1004	7.78546	9.10472	8.58318	9.67223	7.63248	7.89812	8.4465	8.78079	10.3915	9.35387	8.46329	9.24736	10.229	11.9096	12.2773	12.7211	11.7842	14.7532	13.7861	11.8881	9.78626	12.5534	11.7546	13.6802	10.7378	10.2495	11.6055	17.1542	12.943	6.94158	21.6534	14.673	20.3187	18.8946	21.9631	27.8029
AAEL001596	28.2519	35.9349	28.3561	30.868	30.8527	33.9034	31.2672	27.7616	29.3533	30.5714	33.3426	28.7593	29.5777	31.2479	30.7319	32.3241	35.4776	31.6204	32.0052	32.8568	36.3288	33.3388	39.6974	43.4594	38.2061	33.5308	31.5988	28.3864	30.7169	31.0582	29.5834	33.6443	26.0895	27.5709	29.222	27.5006	31.5182	30.6239	28.8279	29.6177	41.5483	34.7914	44.8631	45.9909	41.7984	65.2118	47.1135	60.4519	54.0793
AAEL001584	0.119481	0.127573	0	0.021618	0.067168	0.097706	0.119445	0.034437	0.055739	0.0768318	0	0	0.009809	0.035724	0.0113832	0.046542	0	0	0	0.0116355	0	0.036808	0	0.009056	0.011466	0	0.053164	0.012584	0	0.016437	0.031194	0	0.07082	0.055737	0.0394378	0	0.010508	0	0	0.002627	0.038667	0.03032	0	0.048537	0.029381	0.081043	0	0.041912	0.068619
AAEL001573	8.96418	23.7295	10.5856	9.22405	13.1258	17.3712	15.0164	9.27106	10.6366	13.0738	15.772	19.1738	15.7178	15.1917	16.4638	18.5246	17.8206	19.7988	19.8805	19.0061	18.867	26.1183	22.1539	19.9533	21.7731	14.8814	28.0622	14.7169	16.5426	18.5508	8.54524	23.3232	11.4412	12.1661	13.869	7.23972	19.211	7.72473	5.72926	9.97619	8.53267	14.1781	11.4629	18.489	13.1657	23.7941	24.2356	19.7407	31.9275
AAEL001554	2.47997	2.38922	1.71949	2.30931	2.2245	2.32376	1.93565	1.1609	1.96836	1.84717	1.72443	1.87524	1.3967	1.77573	1.69302	1.29127	1.97119	1.37976	1.31614	1.48959	1.6868	1.84312	1.2208	1.74578	1.62413	1.79114	2.22242	1.37623	1.5793	1.74228	1.52103	1.86469	1.2465	1.75691	1.59728	1.61972	1.99523	1.47443	1.97376	1.76579	2.64159	2.66787	2.95107	3.51492	2.94386	4.75172	5.16638	4.88587	6.10329
AAEL001588	64.5119	78.7851	57.2762	69.713	67.5715	69.156	79.7457	69.8452	75.7954	73.6356	436.318	455.601	403.724	491.134	446.694	619.136	708.84	701.372	806.881	709.057	773.366	704.978	840.902	889.186	802.108	892.747	868.002	1005.82	931.313	924.47	596.333	629.719	616.865	639.013	620.482	305.945	400.013	363.24	342.667	352.966	161.728	221.04	154.148	237.016	193.483	109.447	205.833	133.529	162.558
AAEL001569	38.6521	56.5336	33.9592	35.253	41.0995	55.3634	41.6838	42.7073	38.1965	44.4877	60.8895	53.0681	46.241	46.6074	51.7015	52.8719	48.8248	45.6276	40.0508	46.8438	39.9562	46.7585	42.7162	41.2105	42.6603	48.4515	61.2964	51.3885	49.6826	52.7047	63.3807	60.839	61.1564	57.7272	60.7758	59.4036	65.4262	58.971	57.0962	60.2242	83.9583	80.4364	83.9333	86.3542	83.6705	111.694	123.683	114.988	113.434
AAEL001545	1.04677	1.73184	0.956231	1.53097	1.31645	1.40275	1.06337	1.17968	1.11051	1.18908	0.648405	0.305584	0.327611	0.538621	0.455055	0.774072	0.553291	0.268868	0.467963	0.516049	0.943444	1.04158	0.669691	1.17896	0.958418	1.09681	1.65392	1.30521	1.40295	1.36472	1.8868	1.70091	1.37088	1.49035	1.61223	1.54376	1.4327	1.2753	1.44166	1.42336	2.65539	1.94174	1.61135	2.39294	2.15036	2.85758	2.78385	3.5204	2.62044
AAEL001595	1.76775	1.78181	2.39243	2.24522	2.0468	2.52266	2.07942	1.71881	1.82371	2.03615	0.932913	0.651706	0.607361	0.796724	0.747176	1.02582	0.423011	0.892877	0.733227	0.768735	1.07541	0.743378	1.04788	1.31669	1.04584	1.56715	1.16512	1.38182	1.886	1.50002	1.75581	1.73209	1.73136	1.56143	1.69517	2.59846	2.05402	2.15136	1.79256	2.1491	3.92444	3.5058	4.38169	3.77251	3.89611	4.51041	3.04398	5.26491	3.29015
AAEL001581	28.3119	29.4411	23.4598	27.5711	27.196	28.4783	28.7006	24.0921	24.7479	26.5047	11.4049	13.8817	13.5303	13.1822	12.9998	12.9596	12.6603	8.78628	12.1031	11.6273	13.5889	15.6022	12.6883	14.7286	14.152	15.5622	19.5588	16.1264	15.1183	16.5914	24.5542	27.0083	22.7771	20.922	23.8154	27.6868	25.1079	27.2233	26.4862	26.6261	40.8478	41.2536	38.1918	44.64	41.2333	48.244	61.0546	52.5024	53.7755
AAEL001568	0.110956	0.363208	0.053136	0.037757	0.141264	0.096712	0.098664	0.104472	0.109727	0.102394	0.031734	0.062552	0.044238	0	0.034631	0.027386	0.073388	0	0.073786	0.04364	0	0.138959	0	0.02102	0.0399948	0	0.156757	0.029603	0	0.04659	0	0.044608	0.023482	0	0.0170225	0.208289	0.108977	0.1169	0.185669	0.154959	0.152102	0.278876	0.087529	0.174334	0.17321	0.127674	0.168319	0.29107	0.321587
AAEL017133	23.2033	22.2773	19.5363	21.4675	21.6211	25.6855	23.0288	21.2561	23.7605	23.4327	19.9299	17.4181	12.1186	21.8952	17.8405	41.1435	42.5779	32.9208	57.1024	43.4362	65.2831	58.1505	71.4225	83.7426	69.6497	72.5036	68.9326	81.164	60.597	70.7993	22.5374	37.2363	21.4776	20.2093	25.3651	13.4976	22.6306	18.4001	14.4787	17.2518	16.65	17.8385	18.206	25.3441	19.5097	44.3442	41.2599	44.1334	51.9577
AAEL019443	0.064519	0.107406	0.018748	0.00914	0.0499532	0.014572	0.077542	0.044288	0.028154	0.041139	0.011246	0.005697	0	0.045524	0.0156168	0.01958	0.02633	0.010754	0.02685	0.0208785	0.00561	0.009718	0	0	0.003832	0.073093	0.06134	0.010785	0.03072	0.0439845	0.092193	0.064598	0.007899	0.015907	0.0451493	0.074304	0.083659	0.083735	0.048842	0.072635	0.064579	0.025639	0.101001	0.075769	0.066747	0.067476	0.006305	0.110379	0.034465
AAEL001566	0.30685	0.077538	0.065053	0.137697	0.146784	0.196811	0.031157	0.061346	0.104381	0.0984237	0.057232	0.065498	0.069641	0.05437	0.0616852	0.050647	0.111851	0.045945	0.124992	0.0833587	0.197782	0.123901	0.130803	0.123978	0.144116	0.081335	0.125283	0.071679	0.20952	0.121954	0.134802	0.140629	0.102461	0.096151	0.118511	0.018391	0.066119	0.057013	0.063687	0.0513025	0.170919	0.069288	0.058164	0.255209	0.138395	0.174688	0.138048	0.130743	0.080183
AAEL001557	12.6042	15.9188	10.5525	13.2042	13.0699	12.5066	13.3986	9.3795	12.6695	11.9885	9.74941	7.32916	7.36782	8.98407	8.35762	10.4097	11.5457	9.30625	11.9115	10.7933	13.1713	16.3799	16.0653	17.1588	15.6938	17.5107	18.8103	16.3406	17.6205	17.5706	26.518	26.2547	24.6859	24.3376	25.449	31.2944	27.722	31.5095	37.2359	31.9404	56.0209	42.2549	51.8008	56.6022	51.6697	51.6801	57.424	52.1624	51.9682
AAEL013484	28.8763	17.6297	27.6462	21.9503	24.0256	29.3598	18.6394	22.7457	21.9391	23.171	4.67263	4.49303	4.37342	4.74579	4.57122	9.0058	7.05968	3.31441	8.30002	6.91998	10.2904	6.40378	8.81152	10.2835	8.94731	20.9953	13.2257	16.3733	39.7123	22.5767	90.7844	44.4716	68.8015	69.2336	68.3228	107.785	49.6018	93.0846	99.3551	87.4566	96.7475	69.2282	98.7674	83.7142	87.1143	73.2971	31.8685	51.5686	44.0401
AAEL013487	2.58276	1.66989	1.36855	1.66913	1.82258	2.1576	1.87103	1.65161	1.84063	1.88022	2.54896	1.66064	1.88646	2.21164	2.07692	2.33288	2.21693	1.10526	1.44198	1.77426	2.60098	2.8877	1.67511	1.99086	2.28866	1.81637	2.75046	1.38423	1.80513	1.93905	2.31636	1.99805	1.28775	1.88003	1.87055	1.88551	1.33781	1.45127	1.43584	1.52761	2.27917	1.92485	1.51491	1.81188	1.8827	2.28995	3.54332	1.75664	2.61574
AAEL013490	29.2673	50.4039	46.833	51.7483	44.5631	48.3068	50.8382	48.5668	48.2087	48.9801	22.7383	37.4522	23.2452	47.2884	32.681	51.4865	51.0052	46.6067	53.8722	50.7426	33.9362	27.0978	34.0167	73.6412	42.173	66.1957	34.1649	71.1443	79.1646	62.6674	58.5768	35.8747	31.449	53.9943	44.9737	47.9442	25.4139	51.687	28.1291	38.2936	42.8537	25.787	43.3969	43.3552	38.8482	46.9072	39.9545	52.3988	46.7319
AAEL013491	17.7534	15.0794	19.597	22.3016	18.6828	20.9086	17.326	21.0868	21.4012	20.1806	28.1523	21.9462	26.0196	27.6249	25.9358	44.0758	45.7735	54.3654	43.2659	46.8701	49.2566	38.0125	50.3711	41.2224	44.7156	11.2109	14.7225	12.5808	8.10591	11.655	2.00507	3.43959	1.77689	2.06078	2.32058	0.974202	3.31975	1.62515	1.78452	1.92591	2.79909	2.61182	4.67439	5.0214	3.77668	14.4591	7.44797	15.5752	35.6112
AAEL013483	0.355504	0.942633	1.10424	0.794638	0.799254	0.551954	0.813303	0.274574	0.625394	0.566306	0.620491	1.16697	0.395054	0.51833	0.675211	0.35586	0.347994	0.45472	0.643533	0.450527	0.437986	0.446151	0.591029	0.637924	0.528272	0.530294	0.640887	0.715282	0.642114	0.632144	0.661848	0.683802	0.690599	0.77907	0.70383	1.2807	0.514316	0.33629	0.761069	0.723093	1.41897	1.35005	1.01577	1.01452	1.19983	0.741675	0.819831	1.24745	1.16674
AAEL013488	1.53832	1.76702	1.86605	1.47983	1.66281	2.46138	1.74951	1.54629	1.76585	1.88076	2.38458	2.0538	1.44806	2.37526	2.06543	3.00784	3.15647	1.94174	3.03924	2.78632	1.84681	3.18963	2.64027	1.40683	2.27088	1.60567	2.16039	1.67862	1.07794	1.63065	0.891307	1.59501	0.805408	0.750771	1.01062	0.512321	1.13912	0.490945	0.799471	0.735463	1.77965	1.20206	1.80417	2.17611	1.7405	6.31414	5.74519	8.02829	7.17323
AAEL013489	0.158038	0.092558	0.036592	0.087922	0.0937775	0.126198	0.208519	0	0.030293	0.0912525	0.054881	0.029706	0.105066	0.083839	0.068373	0.031618	0.210303	0	0.058844	0.0751913	0	0.033341	0	0.121576	0.0387292	0.097523	0	0.034498	0.113054	0.0612687	0	0	0	0	0	0	0.142775	0.148978	0.095025	0.0966945	0.060988	0.326273	0.35623	0.347847	0.272834	0.130986	0.27648	0.339395	0.356539
AAEL013971	0.211855	0.082759	0.043505	0.037808	0.0939818	0	0.020636	0	0	0.005159	0.087268	0	0	0	0.021817	0	0	0	0.023232	0.005808	0	0	0	0.066874	0.0167185	0.025955	0	0	0.034566	0.0151302	0	0.008903	0.049184	0.038151	0.0240595	0	0	0	0.013105	0.00327625	0	0	0.019863	0.180529	0.050098	0	0	0.061017	0.029673
AAEL013970	5.63793	7.36157	5.12646	5.42137	5.88683	6.82428	6.13404	5.85008	6.40753	6.30398	4.31126	3.17478	3.81536	3.18403	3.62136	4.9475	3.37918	2.51318	3.26888	3.52718	4.52544	4.2858	4.7583	4.54014	4.52742	6.36132	6.00725	6.03828	5.46995	5.9692	6.4499	6.40767	5.80558	6.40429	6.26686	6.52713	6.5508	5.72827	6.90064	6.42671	9.97678	8.7634	9.76074	9.81031	9.57781	15.2293	12.0704	14.1084	12.7817
AAEL013969	13.654	7.52216	10.8403	7.59411	9.90265	8.51562	10.1496	12.9634	10.8329	10.6154	9.78933	7.33871	7.88356	8.9832	8.4987	10.8576	6.32592	4.3306	7.31737	7.20788	10.5716	9.55412	4.72753	9.58206	8.60882	14.1724	14.2453	12.7544	12.9572	13.5323	20.4767	9.7345	15.1789	17.5034	15.7234	19.4017	17.6816	15.4189	13.8543	16.5891	31.29	25.5594	28.714	19.053	26.1541	45.7885	30.0308	31.3679	29.7427
AAEL006880	9.69346	15.2854	9.74595	10.5327	11.3144	13.7983	11.7708	12.814	12.192	12.6438	7.4399	9.76794	6.45386	7.9776	7.90983	8.86208	8.9766	8.51815	7.79735	8.53854	9.56427	12.1054	9.72566	11.5245	10.73	14.2472	19.7252	12.8549	13.5182	15.0864	17.3473	16.8756	13.4218	13.3625	15.2518	13.9618	17.8826	14.3035	14.5669	15.1787	16.9986	20.3059	16.504	12.1733	16.4955	27.9283	29.7809	28.3284	27.3574
AAEL006879	256.233	278.721	260.252	275.543	267.687	264.547	269.046	200.116	249.008	245.679	64.6106	77.5236	77.6161	59.6085	69.8397	41.4374	37.6031	28.2742	30.36	34.4187	33.5223	55.1901	35.8384	35.1639	39.9287	50.7521	74.5962	54.1742	59.3553	59.7194	88.7615	86.9205	81.354	72.818	82.4635	83.2019	87.1181	76.1112	83.7393	82.5426	124.764	126.884	135.213	135.809	130.668	192.159	199.858	204.216	207.729
AAEL006882	0.384143	0.3438	0.305476	0.358184	0.347901	0.097645	0.342875	0.261154	0.258066	0.239935	0.389707	0.303596	0	0.104942	0.199561	0.437086	0.718443	0.50347	0.991312	0.662578	0.531935	0.987234	0.562315	0.654811	0.684074	1.04022	0.662132	1.22613	0.908251	0.959183	0.682304	0.804548	0.37256	0.906439	0.691463	0.490256	0.813453	1.09699	0.606148	0.75171	0.677531	0.134926	0.565785	0.932173	0.577604	0.798714	0.667849	0.531345	0.18789
AAEL006883	42.2744	52.3921	40.0247	44.9529	44.911	6.3026	3.18658	3.1868	3.06432	3.93507	3.93221	6.82867	6.18432	6.75763	5.92571	14.6843	19.1237	14.0781	11.5719	14.8645	11.723	20.4894	19.1814	8.58497	14.9947	9.66656	15.2689	13.0916	10.688	12.1788	7.66243	12.44	12.5144	6.59199	9.80219	10.0495	11.3612	12.0514	7.61242	10.2686	8.02424	10.3166	10.8812	10.2747	9.87418	37.201	23.2047	31.8979	34.2174
AAEL006886	36.8136	53.5614	32.0307	37.3455	39.9378	36.4659	27.5186	20.0047	24.6604	27.1624	4.86153	10.688	9.72714	6.92639	8.05076	8.36985	7.78027	3.64576	5.05746	6.21334	4.72291	16.9639	5.14832	4.17817	7.75333	8.22669	19.5035	9.99079	6.95586	11.1692	8.74334	15.6802	10.9923	8.43742	10.9633	8.74358	19.7282	11.4577	7.36988	11.8248	19.1925	15.1446	23.8853	26.6095	21.208	52.8958	46.7302	34.8707	57.0223
AAEL022496	0.177082	0.195902	0.185224	0.120121	0.169582	0.118632	0.053863	0.159479	0.170369	0.125586	0.058394	0.084405	0.093581	0.077301	0.0784202	0.058305	0.032371	0	0.125421	0.0540242	0.065216	0.280082	0	0.2231	0.142099	0.220749	0.204379	0.171169	0.272133	0.217108	0.058683	0.218197	0.076045	0.231334	0.146065	0.11463	0.04221	0.168484	0.225166	0.137622	0.242715	0.234611	0.371414	0.386	0.308685	0.223044	0.083135	0.148645	0.314129
AAEL006890	2.0979	1.23214	0.353997	0.993265	1.16933	0.08509	0.140365	0.19621	0.45684	0.219626	0	0.115895	0.055491	0.105042	0.069107	0.303107	0	0.091146	0.093431	0.121921	0.036138	0.131083	0.109373	0.141804	0.104599	0.088606	0.281248	0.255591	0.427483	0.263232	0.083203	0	0.200711	0.185872	0.117446	0.142665	0.030125	0	0.056713	0.0573758	1.01658	0.243915	0.661619	1.68657	0.902171	0.446626	0	0.2594	0.39991
AAEL006881	0.882284	0.722149	0.788248	0.657943	0.762656	0.728783	0.359702	0.702851	0.470163	0.565375	0.596656	0.479048	0.808341	0.904674	0.69718	0.648829	0.61245	0.688048	0.684949	0.658569	0.497853	0.738503	0.782316	0.546425	0.641274	0.374462	0.330167	0.235021	0.164577	0.276057	0.36745	0.288303	0.409566	0.316761	0.34552	0.445279	0.309074	0.68487	0.590461	0.507421	1.13338	0.74614	1.30125	1.32003	1.1252	3.08826	1.51701	2.01048	0.984683
AAEL024836	0	0	0	0	0	0	0	0	0	0	0.087035	0	0	0	0.0217588	0	0.153669	0	0	0.0384173	0	0	0	0	0	0	0	0	0	0	0	0.039012	0	0	0.009753	0	0	0	0	0	0.044564	0	0	0	0.011141	0	0	0	0
AAEL006887	17.815	16.8222	15.7148	15.3274	16.4198	17.9664	17.2237	19.384	20.3044	18.7196	31.1625	37.1373	38.0062	37.8222	36.032	34.9804	41.5657	53.4201	39.9984	42.4911	18.5389	33.5468	33.7859	16.4597	25.5828	4.77911	16.1694	7.5379	3.18686	7.91833	1.51975	6.21045	1.97799	2.84171	3.13747	2.3561	4.28008	2.1195	1.65273	2.6021	4.27765	8.60375	6.45457	10.0708	7.35169	61.8275	47.573	67.051	89.9947
AAEL006885	327.267	423.18	313.782	353.356	354.396	394.577	340.513	366.167	350.183	362.86	422.183	387.45	419.307	431.819	415.19	463.466	430.851	416.203	392.699	425.805	465.098	430.29	479.362	462.86	459.402	387.935	459.629	430.956	356.169	408.672	314.806	346.536	283.719	295.593	310.163	299.323	336.264	294.842	251.94	295.592	388.112	381.361	419.112	442.385	407.742	768.625	625.701	693.755	666.74
AAEL006895	29.9035	30.4429	28.1526	26.3188	28.7044	32.82	33.0462	33.3925	33.1989	33.1144	9.08541	11.0938	11.0536	11.2603	10.6233	5.88998	5.58861	5.23091	5.36898	5.51962	6.18193	6.23828	5.09088	4.19184	5.42573	9.81478	9.94991	10.6858	13.1045	10.8887	14.8113	21.0515	13.8544	16.1163	16.4584	16.9231	21.7914	17.0572	19.8875	18.9148	21.8366	19.2095	28.9479	32.6005	25.6486	34.8626	26.084	27.63	47.9157
AAEL006892	0	0	0	0	0	0	0	0.062009	0	0.0155023	0	0	0	0	0	0	0	0	0	0	0	0	0	0	0	0	0	0	0	0	0	0	0	0	0	0	0	0.027729	0	0.00693225	0.219753	0	0	0.231482	0.112809	0	0	0	0
AAEL020955	9.49897	10.1454	7.95784	7.94673	8.88724	10.0352	8.35784	14.7379	9.60955	10.6851	2.83516	3.08071	3.5057	3.08218	3.12594	5.10526	5.43168	2.27931	3.71574	4.133	5.33696	10.4308	5.23993	4.57278	6.39513	5.69418	11.7327	4.24117	7.15431	7.2056	9.00509	9.21114	5.9617	6.92849	7.77661	9.91497	11.1151	9.98802	9.42226	10.1101	16.2159	17.8146	16.3008	17.0524	16.8459	22.0324	27.5124	17.7807	20.7821
AAEL023188	49.1623	55.4325	43.4054	46.821	48.7053	55.9296	53.8194	47.8943	44.6006	50.5609	146.946	141.429	120.493	166.318	143.796	195.817	205.08	191.667	187.383	194.987	170.975	165.791	197.012	166.117	174.974	63.3316	80.0658	66.5955	61.1339	67.7817	32.8405	51.2653	35.5693	27.9652	36.91	27.4926	40.3542	27.5469	20.145	28.8847	37.9514	40.7435	35.6763	42.7818	39.2883	74.9643	69.7032	68.6924	78.8077
AAEL023873	0.101959	0	0	0	0.0254897	0	0	0	0.142207	0.0355518	0	0	0	0.244071	0.0610178	0.13632	0	0	0	0.03408	0	0	0	0.13957	0.0348925	0	0	0	0.285492	0.071373	0	0	0	0	0	0	0	0	0	0	0	0	0	0	0	0	0	0	0.121296
AAEL010520	33.3565	34.4112	29.2462	31.9784	32.2481	37.1142	32.9018	32.4449	33.2354	33.9241	37.2418	40.3443	35.1039	44.1683	39.2146	42.8293	49.1712	37.0186	42.7704	42.9474	41.9249	50.4169	46.8019	48.5182	46.9155	37.4166	43.0856	39.2579	33.3691	38.2823	22.5562	29.4956	20.7835	24.3084	24.2859	20.0763	24.8578	21.1795	20.6912	21.7012	31.0896	31.1375	33.3576	39.0976	33.6705	71.6035	62.868	68.1263	80.26
AAEL027801	4.85859	4.09931	4.21676	4.34916	4.38096	5.38425	3.82179	3.65831	4.01516	4.21988	3.38391	3.44955	3.81994	3.532	3.54635	3.17581	2.56011	3.33422	2.92344	2.9984	3.10307	3.96469	2.88798	2.81578	3.19288	3.19178	3.45984	3.67782	3.44772	3.44429	4.46694	4.38225	4.29201	4.93156	4.51819	4.69241	4.97581	5.14538	5.72244	5.13401	8.12393	7.97251	8.70672	9.04947	8.46316	13.7423	10.7792	13.1468	12.2976
AAEL026415	31.1884	38.5287	27.5475	31.1147	32.0948	34.9323	33.2338	34.9312	32.8671	33.9911	35.4201	30.7764	32.7069	41.8739	35.1943	39.7066	36.9855	35.8237	36.6851	37.3002	50.0482	46.005	44.8563	44.6972	46.4017	57.0958	54.7186	59.2362	56.6198	56.9176	65.4645	59.4264	62.9444	63.593	62.8571	67.4352	62.1302	60.1258	68.7699	64.6153	69.2804	60.8803	68.3431	66.7002	66.301	65.924	68.3712	75.4939	62.3059
AAEL021954	0.133605	0.264508	0	0	0.0995282	0	0	0.248811	0	0.0622028	0	0	0	0	0	0.180035	0	0	0	0.0450088	0	0	0	0	0	0.084991	0	0	0	0.0212477	0.32935	0	0.524238	0	0.213397	0	0	0.169812	0	0.042453	0	0	0	0	0	0	0	0	0.401363
AAEL010523	2.63856	2.31929	2.42876	1.99911	2.34643	2.28322	1.97891	1.80396	1.92543	1.99788	1.76373	1.35468	1.46707	1.5158	1.52532	1.39468	1.43335	1.12848	1.19544	1.28799	1.61057	1.35841	1.50368	1.27549	1.43704	1.87164	1.73644	1.37209	1.7668	1.68674	2.69213	1.93604	2.0263	1.9976	2.16301	2.02925	1.71691	2.08059	2.26083	2.0219	5.46797	3.46601	5.90736	5.33814	5.04487	8.28939	4.62302	7.26607	4.61445
AAEL010524	7.03615	10.0066	7.8832	7.04994	7.99397	6.41463	6.6396	6.21826	6.01861	6.32277	5.59381	4.79753	5.08165	4.47646	4.98736	4.65092	3.14472	3.79605	4.28728	3.96974	3.24426	6.12164	5.06827	4.29519	4.68234	5.84108	6.21701	5.50365	6.07189	5.90841	8.03903	10.8259	8.49324	13.0565	10.1037	13.1582	12.0251	14.0638	18.6257	14.4682	29.5549	24.7603	28.0875	38.2873	30.1725	32.5833	29.7676	31.8876	31.9793
AAEL022354	0	0	0	0	0	0	0.107019	0	0	0.0267548	0	0	0	0	0	0	0	0	0	0	0	0	0	0	0	0	0	0	0	0	0	0.132895	0	0	0.0332238	0	0	0	0	0	0	0	0	0	0	0	0	0	0
AAEL010522	7.66186	9.21127	6.15525	7.80122	7.7074	8.64564	6.91022	8.23916	7.99221	7.94681	5.0552	5.37093	4.99331	6.06622	5.37141	4.53833	4.21739	4.45076	4.64215	4.46216	4.09835	5.30289	4.61811	2.69905	4.1796	3.28496	4.67834	3.21439	3.07549	3.56329	4.03649	3.98392	3.42548	3.50156	3.73686	5.07302	4.71023	4.794	5.54946	5.03168	9.90993	8.79145	11.0849	11.2274	10.2534	20.9975	12.8016	21.1075	17.1586
AAEL013384	4.68663	4.31351	5.13592	4.92521	4.76532	5.40793	4.44887	3.87921	4.11267	4.46217	1.91444	1.09996	1.82997	1.17205	1.5041	1.67284	1.35568	0.703985	0.996066	1.18214	1.60577	1.83241	1.46133	2.3121	1.80291	3.23324	2.03327	2.37857	2.22626	2.46783	3.74976	2.41862	3.0069	2.6269	2.95055	3.72628	2.45518	3.16754	2.81847	3.04187	5.59965	3.85892	6.41348	5.77203	5.41102	7.91365	4.89143	5.95134	4.59489
AAEL013382	2.33508	1.9822	2.06349	1.38532	1.94152	2.41573	0.985887	1.33355	1.86516	1.65008	1.29432	1.25453	1.28228	3.12019	1.73783	2.11078	1.0857	1.55438	1.34855	1.52485	2.06087	1.9675	0.813784	2.12525	1.74185	2.21918	2.50444	3.70106	2.39952	2.70605	2.80328	2.32161	2.97341	2.29707	2.59884	3.02801	2.38004	2.31615	3.19732	2.73038	4.11402	3.06108	2.6266	4.96502	3.69168	4.60193	3.16175	4.04559	3.93341
AAEL013385	2.86139	4.12208	1.61981	3.66675	3.06751	0.442023	0.783385	0.995147	2.06715	1.07193	0.564791	0.293762	1.31816	0.471316	0.662007	0.88028	0.800554	0.592145	1.44932	0.930574	0.419487	1.03596	1.13302	1.1351	0.930893	1.54084	1.76437	1.5313	1.96319	1.69993	0.53469	2.21074	1.26416	1.17222	1.29545	0.492109	0.556654	0.541563	0.967908	0.639559	2.22485	1.97603	1.97438	3.70007	2.46883	1.10262	0.597648	0.938506	0.927909
AAEL028107	12.1181	15.374	11.5829	11.9537	12.7572	13.6326	12.8828	12.4171	12.3166	12.8123	15.6216	13.6344	12.9709	14.1102	14.0843	12.1713	13.4169	11.3971	12.0255	12.2527	11.4893	11.5365	12.3229	11.5846	11.7333	12.1285	14.5866	11.8337	10.7667	12.3289	12.9401	15.2368	11.9854	13.5835	13.4364	14.8379	17.0862	11.903	12.0221	13.9623	20.0212	22.4523	21.0253	22.6274	21.5316	32.9415	32.4943	32.6135	30.5222
AAEL011592	6.3439	5.15493	5.28429	5.05801	5.46028	4.69664	3.95915	4.67408	5.11981	4.61242	3.41092	4.13574	5.57232	5.06162	4.54515	4.22454	3.67473	4.69701	4.47468	4.26774	4.61816	4.66089	5.52853	4.45733	4.81623	4.07845	3.90776	5.38354	4.3615	4.43281	4.30569	4.22461	3.47555	4.15358	4.03986	5.02165	3.8779	5.76068	6.47792	5.28454	11.4646	9.1303	14.6749	16.7624	13.008	16.7876	14.0125	14.2969	11.155
AAEL025591	7.83148	10.1487	7.0434	8.455	8.36965	7.66448	7.33149	5.91394	6.87787	6.94695	7.03476	7.06777	7.89676	7.9135	7.4782	5.00877	5.41882	3.82278	4.37368	4.65601	5.24032	7.80467	4.95268	4.49977	5.62436	5.41674	10.0263	5.01085	5.43403	6.47197	8.8692	10.0382	8.09858	9.7637	9.19242	13.7759	11.4795	11.6546	15.1563	13.0166	25.2102	27.7236	23.9214	28.2151	26.2676	26.9678	42.098	23.7034	29.0618
AAEL011588	130.942	130.665	120.5	118.102	125.052	142.959	111.906	124.692	134.696	128.564	130.975	129.376	123.059	133.703	129.278	136.048	139.171	125.117	138.95	134.821	184.674	160.73	165.525	185.967	174.224	241.629	230.108	230.122	221.213	230.768	353.395	289.996	335.525	339.853	329.692	383.803	382.348	398.513	375.367	385.008	400.88	349.02	373.311	364.159	371.842	229.626	284.976	263.494	208.72
AAEL011591	0.058759	0.058159	0.065079	0.164469	0.0866165	0.040575	0.038819	0.033576	0.017499	0.0326173	0.511865	0.107173	0.295673	0.757897	0.418152	0.557557	0.37601	0.436734	0.58121	0.487878	0.49515	0.317618	0.34702	0.315299	0.368772	0.148963	0.268028	0.139532	0.131496	0.172005	0.048967	0.209242	0.093699	0.169107	0.130254	0.26436	0.145995	0.170047	0.083875	0.166069	0.291722	0.665553	0.473188	0.385869	0.454083	0.300827	0.360707	0.123849	0.153993
AAEL012157	2.78453	2.87896	1.6935	2.65131	2.50207	2.43712	2.35215	1.77652	2.19832	2.19103	4.02895	4.30668	3.6419	4.42786	4.10135	5.22303	5.92828	3.32569	3.74246	4.55486	3.2316	4.26027	4.04214	3.16102	3.67376	2.7935	3.43771	2.55175	2.60235	2.84633	4.05932	3.13944	3.32708	3.39329	3.47978	5.54108	4.5934	4.52158	5.58352	5.0599	21.4997	13.7682	22.5856	25.0422	20.7239	21.1961	21.9591	21.348	12.8524
AAEL012153	0.105622	0.213848	0.11184	0.094398	0.131427	0.093681	0.093353	0.044832	0.238607	0.117618	0.315844	0.286951	0.280608	0.268626	0.288007	0.257107	0.451648	0.265867	0.261925	0.309137	0.230799	0.224392	0.246131	0.191815	0.223284	0.187217	0.304084	0.083541	0.077656	0.163124	0.136215	0.180893	0.108164	0.416187	0.210365	0.235191	0.156775	0.311182	0.277397	0.245136	0.580185	0.240079	0.347146	1.50904	0.669113	0.21309	0.522042	0.388799	1.155
AAEL021400	8.3698	8.35023	7.27818	7.42139	7.8549	9.2441	7.48358	7.15622	6.75824	7.66053	10.1119	11.255	10.1995	10.8576	10.606	7.81913	7.94479	6.60224	6.45917	7.20633	7.29205	7.80089	6.54594	7.99477	7.40841	6.68725	9.23094	7.06102	8.03524	7.75361	8.10794	7.97483	7.0118	6.88792	7.49562	7.16579	7.28022	6.95344	7.41829	7.20443	11.3488	9.93861	9.79895	11.0566	10.5357	16.2636	16.1638	13.2138	16.7719
AAEL012154	10.9943	9.0023	11.6584	10.3819	10.5092	7.71697	6.8479	5.59788	8.2223	7.09626	11.4845	7.92082	8.85229	8.98166	9.30981	9.88247	8.83403	7.27637	7.90999	8.47571	6.19367	7.97297	5.51511	3.51473	5.79912	1.62724	3.89171	1.72953	1.64496	2.22336	1.10393	2.93054	1.6543	1.47399	1.79069	2.16296	2.10046	1.87721	2.17647	2.07928	2.99645	3.06039	3.55583	4.05461	3.41682	8.38344	6.86718	9.3098	16.8663
AAEL015124	0.56766	0.701689	0.657841	0.862946	0.697534	0.869745	0.4132	0.339004	0.42273	0.51117	0.433704	0.454911	0.349065	0.433761	0.41786	0.635082	0.891391	0.47963	0.713523	0.679906	0.910806	0.507562	0.428043	1.04701	0.723356	1.65248	0.970232	1.94533	1.76273	1.58269	1.72377	1.11133	1.72275	1.96383	1.63042	2.70662	2.30235	2.2222	3.24835	2.61988	2.67976	2.20812	2.3487	2.23833	2.36873	0.41995	0.435272	1.26341	0.405275
AAEL012156	2.65938	3.68736	2.81479	2.24769	2.8523	3.68604	2.80562	2.29339	2.50344	2.82212	4.09629	4.59855	3.85305	4.77618	4.33102	3.98959	3.98711	4.91357	4.94541	4.45892	4.55048	4.55301	4.77847	4.39412	4.56902	2.69739	3.74936	3.11318	3.30387	3.21595	3.88392	3.74002	3.0171	2.7812	3.35556	3.26557	3.35389	3.58213	3.29708	3.37467	5.37658	5.43806	5.7055	4.88755	5.35192	9.80341	9.31204	7.71106	9.4178
AAEL012152	13.532	12.8517	14.4593	16.0713	14.2286	15.859	12.9839	12.2086	12.4231	13.3686	8.42477	8.10829	7.41409	8.81266	8.18995	7.78851	9.08684	6.61446	8.30739	7.9493	7.59631	10.3162	8.15219	8.67581	8.68513	11.8569	9.00506	11.1665	12.9553	11.2459	17.1029	17.4728	15.3091	20.2343	17.5298	22.8593	20.4088	19.2668	26.4554	22.2476	39.589	31.9858	47.1321	38.4484	39.2888	39.7033	29.4688	35.2111	26.6371
AAEL025708	0.110192	0.100958	0.027928	0.332127	0.142801	0.307628	0	0.082667	0.322494	0.178197	0	0	0.041267	0.030645	0.017978	0.064465	0.03146	0.090569	0.173719	0.0900533	0.024086	0.234959	0.073166	0.109013	0.110306	0	0.07996	0	0.163657	0.0609043	0	0.087008	0	0.025002	0.0280025	0	0.040735	0.077785	0.093915	0.0531088	0.08905	0.113986	0.258081	0.249475	0.177648	0.512324	0.372826	0.247697	0.195058
AAEL028840	0	0	0	0	0	0	0	0	0	0	0	0	0.076506	0	0.0191265	0.064028	0	0	0.067959	0.0329967	0	0	0	0.055953	0.0139882	0	0	0	0.130251	0.0325628	0	0	0	0	0	0	0	0	0	0	0.143711	0	0.171002	0.362399	0.169278	0	0	0	0.133509
AAEL028891	0.67383	0.091712	0	0.09078	0.214081	0.087276	0.325327	0.293187	0.12069	0.20662	0.338738	0.17735	0.302412	0.220682	0.259796	0.180207	0.248538	0.065805	0.127425	0.155494	0.078803	0.05343	0.224766	0.043217	0.100054	0	0.639233	0	0.109739	0.187243	0.248605	0.065574	0	0.076209	0.097597	0.199123	0.426482	0.382294	0.098449	0.276587	0.437242	0.092167	0.074744	0.101392	0.176386	0.182637	0.123739	0.117015	0.953441
AAEL027135	0.757638	0.600614	1.02581	1.15389	0.884489	1.2012	0.457085	0.972292	1.2401	0.967669	0.569162	0.20305	0.640328	0.342575	0.438779	0.468579	0.562369	0.684928	0.539382	0.563814	0.826128	0.607852	0.44166	0.845051	0.680173	1.21107	1.18827	1.03584	1.57346	1.25216	1.78239	1.39413	1.67092	2.25245	1.77498	2.61009	1.69218	2.00325	3.20797	2.37837	6.95083	4.06242	6.36892	7.58859	6.24269	7.15001	5.23888	4.21711	4.09338
AAEL023034	0	0	0	0	0	0.049846	0	0	0	0.0124615	0	0	0	0	0	0	0	0	0	0	0	0	0	0	0	0	0	0	0	0	0	0	0	0	0	0	0	0	0.058384	0.014596	0	0	0	0	0	0	0	0	0
AAEL025767	0.168496	0.076151	0	0.048166	0.0732032	0.052892	0	0.034732	0	0.021906	0.040448	0	0.048487	0.045122	0.0335143	0.172481	0.083916	0	0	0.0640992	0	0	0	0.029215	0.00730375	0	0.065089	0	0.024342	0.0223577	0.068972	0.063379	0	0.092981	0.056333	0.154142	0.061881	0.11346	0.071712	0.100299	0.152723	0.22003	0.158061	0.202037	0.183213	0.400574	0.129471	0.016826	0.04423
AAEL010330	110.289	121.139	106.164	112.343	112.484	115.119	117.705	108.726	112.042	113.398	87.9485	103.738	94.2903	97.9762	95.9883	99.845	110.722	110.192	118.056	109.704	127.564	134.458	148.162	141.914	138.024	102.586	122.205	129.454	98.0021	113.062	53.8933	83.522	57.4276	52.4433	61.8216	48.9459	68.7486	54.6186	42.981	53.8235	64.7534	61.056	66.2305	82.8083	68.7121	132.213	118.885	134.271	154.353
AAEL011858	0.563966	1.28625	0.461927	0.638525	0.737668	1.08019	0.403977	0.686601	0.455385	0.656539	0.25145	0.587612	0.619955	0.45564	0.478664	0.818675	0.591161	0.848497	0.80104	0.764843	0.139752	0.636056	0.444242	0.67521	0.473815	1.19027	0.431351	1.27141	0.936833	0.957467	0.746592	1.12708	1.19964	0.558963	0.908068	1.40534	0.683608	1.0962	0.861787	1.01173	1.17033	1.65798	1.68487	0.940733	1.36348	1.99759	1.97259	2.1086	1.43538
AAEL028231	0.762408	1.41321	0.735642	0.406362	0.829406	0.853518	1.05844	0.808123	1.02738	0.936865	0.555341	1.43918	0.809214	1.32824	1.03299	0.998107	0.446221	0.346955	1.12609	0.729342	0.277995	0.085683	0.896907	0.682454	0.48576	0.468435	2.17713	0.96019	1.00494	1.15267	1.2197	0.809265	0.309464	0.658406	0.74921	0.432173	0.507819	0.764071	0.487946	0.548002	1.8086	2.2621	1.69787	1.22306	1.74791	3.10733	2.22246	1.83289	1.89526
AAEL010332	2.73621	3.84564	2.02696	2.54739	2.78905	3.55085	2.35846	1.73738	2.58877	2.55887	2.52282	3.94679	2.81107	2.46164	2.93558	2.57851	3.61981	2.26562	2.16771	2.65791	2.54409	3.31953	1.52123	2.07066	2.36388	1.41554	1.8394	1.2142	1.50821	1.49434	1.38381	2.01407	1.89212	1.53762	1.7069	1.53635	1.29675	1.73786	1.36353	1.48362	1.85423	1.82036	2.53031	2.39758	2.15062	4.49695	2.54856	4.60503	3.67485
AAEL011868	1.47969	1.78374	1.41706	1.58191	1.5656	1.47755	1.23814	0.900348	1.41441	1.25761	1.07257	1.9071	1.88611	2.31952	1.79632	1.14359	1.1427	1.21803	1.45851	1.24071	1.10894	1.89683	1.41522	1.272	1.42324	1.3574	1.15306	1.60098	1.34343	1.36372	1.16515	1.08922	2.02316	1.68593	1.49087	1.05123	1.68632	1.24198	2.07298	1.51313	2.72286	2.2155	3.25307	3.12052	2.82798	3.2715	3.34535	3.73804	4.44957
AAEL011862	1.55585	1.35964	1.13187	1.42684	1.36855	2.05412	1.79429	0.222321	1.68103	1.43794	0.134428	0.102189	0.688066	0.703429	0.407028	0.450894	0.703866	0.05984	0.545276	0.439969	0.208824	0.28366	0.082034	0.196458	0.192744	0.671331	1.29782	0.467789	0.801415	0.809589	1.70305	1.27324	0.142501	1.31984	1.10966	1.88212	0.231609	1.08149	1.14559	1.0852	1.74272	0.988927	1.24663	1.62171	1.39999	2.60413	2.70233	1.14443	2.38261
AAEL025514	0.826894	0.726971	0.74931	0.571293	0.718617	0.419528	0.403913	0.348942	0.379521	0.387976	0.325456	0.307115	0.333368	0.313907	0.319962	0.425439	0.273251	0.197961	0.375397	0.318012	0.346363	0.377747	0.516933	0.461869	0.425728	0.714542	0.746943	0.476122	0.678065	0.653918	0.972044	0.935175	0.499097	1.28523	0.922886	0.657597	0.701968	0.914863	1.22084	0.873818	1.5997	1.29154	1.36737	2.12116	1.59494	0.966731	1.11465	0.957617	1.13447
AAEL011867	0.240634	0.043472	0.089444	0.153261	0.131703	0.201155	0.14044	0.155954	0.095914	0.148366	0.032713	0.077822	0.047035	0.089414	0.061746	0.437582	0.24646	0.216164	0.384011	0.321054	0.732823	0.430372	0.635529	1.06498	0.715925	1.00341	0.607087	1.40906	1.22779	1.06184	0.928784	0.934267	0.882431	1.87152	1.15425	1.06496	0.544043	1.2944	1.28607	1.04737	0.482299	0.524963	0.331492	0.396404	0.433789	0.078515	0.101229	0.033656	0.214145
AAEL013561	4.38735	4.05958	3.79996	4.18984	4.10918	5.03592	4.31684	4.39278	4.40832	4.53847	4.24372	4.12853	3.42	4.15425	3.98662	4.85018	4.47454	2.33482	4.45996	4.02988	5.81298	4.76448	5.39553	5.85005	5.45576	7.34984	6.63671	6.25944	6.75992	6.75148	7.85246	7.38999	5.99485	6.03348	6.81769	5.08811	5.10314	4.91773	5.12268	5.05792	5.4286	5.55833	4.72676	4.73522	5.11223	6.53934	7.7689	6.22034	7.21097
AAEL013549	2.11414	1.52734	1.61875	2.01798	1.81955	2.09681	1.40618	1.00688	1.2375	1.43684	1.32338	1.62745	1.49435	0.899827	1.33625	0.988781	0.561011	1.30858	1.40661	1.06625	1.22485	1.70845	1.18436	1.17	1.32192	1.1979	1.5207	1.35891	1.31515	1.34817	1.78266	1.81947	1.43277	1.57475	1.65242	1.53326	1.49364	1.53179	1.7812	1.58497	2.68821	2.70014	4.02246	4.00815	3.35474	5.07269	3.92744	5.03421	4.1643
AAEL021055	0.668364	0.18324	0.24745	0.519886	0.404735	0	0	0	0.052438	0.0131095	0.150979	0	0	0	0.0377448	0	0	0	0	0	0	0	0	0	0	0	0	0	0	0	0	0.542102	0.423425	0.112131	0.269415	0.165391	0.37273	0	0	0.13453	0.465121	0.500129	0.083017	0.877694	0.48149	0.394443	0.57971	0.477108	0
AAEL013558	0.52206	0.632289	0.996577	0.777356	0.73207	0.795126	0.564597	0.464136	0.688479	0.628085	0.388322	0.42179	0.22477	0.587522	0.405601	0.403457	0.294766	0.181602	0.219977	0.27495	0.303427	0.570772	0.325865	0.301729	0.375448	0.892287	0.591837	0.309629	0.467942	0.565424	0.68939	0.786376	0.333357	0.829144	0.659567	0.543116	0.351886	0.806186	0.389186	0.522593	1.03868	1.2059	1.14704	1.61785	1.25237	1.07287	1.2979	1.58363	1.16309
AAEL020464	0.747792	0.790891	0.54655	0.985793	0.767756	0.440713	0	0.455386	0.241257	0.284339	0.082282	0.217326	0.24299	0.216404	0.18975	0.567176	0.098941	0.248338	0.454973	0.342357	0.315194	0.252014	0.246992	0.198206	0.253101	1.06215	0.578242	0.220994	0.374854	0.55906	0.451248	0.502284	0.298324	0.337656	0.397378	0.758778	0.434874	0.228166	0.286963	0.427195	0.679228	0.765634	0.799678	0.815836	0.765094	1.20656	0.850854	1.79372	0.906286
AAEL013562	1.12109	1.25303	0.908109	1.14376	1.1065	1.51598	1.03767	0.703566	1.98117	1.3096	1.20448	0.934939	1.02443	0.994581	1.03961	0.956884	0.724792	0.418683	0.487106	0.646866	0.373036	0.740231	0.531072	0.623785	0.567031	0.765661	1.05455	1.40198	1.103	1.0813	1.29468	0.883864	0.946621	0.874185	0.999838	1.0152	1.22315	0.749985	1.2157	1.05101	2.18852	2.23834	2.06027	2.28106	2.19205	3.01397	3.36166	2.9036	3.11705
AAEL013557	2.09328	3.44783	2.48243	2.93928	2.74071	2.98657	2.47512	1.75994	1.94313	2.29119	1.22076	1.12269	1.77001	1.18703	1.32512	1.27143	1.2994	1.47845	1.32024	1.34238	1.18301	2.01707	1.49732	1.58863	1.57151	1.49909	2.49095	1.90539	3.00469	2.22503	3.03367	2.20995	2.80876	2.47176	2.63103	3.06035	2.40962	3.25562	3.09811	2.95593	4.43832	3.38314	4.54532	5.11496	4.37043	6.58561	6.38508	8.24066	7.3972
AAEL023697	0	0	0.092454	0.037884	0.0325845	0.033728	0	0	0	0.008432	0.038364	0	0	0	0.009591	0	0	0	0	0	0.235242	0	0	0	0.0588105	0	0	0	0.117477	0.0293692	0	0	0	0.082039	0.0205098	0.072642	0	0	0.059685	0.0330818	0.054568	0.081238	0.11793	0.046101	0.0749593	0.137979	0.095749	0	0
AAEL021876	1.02877	1.5075	1.57594	1.46178	1.3935	1.31683	1.11628	1.61461	0.701582	1.18733	1.2506	0.985381	1.03113	1.05703	1.08104	1.27222	1.91389	1.3067	1.01114	1.37599	1.63437	2.34433	1.06453	1.34364	1.59672	1.74783	2.06952	1.12736	1.35572	1.57511	0.854861	3.09652	1.1678	1.50788	1.65677	0.756661	2.58074	0.940473	0.994257	1.31803	2.01115	2.31488	2.42911	1.47367	2.0572	4.2852	3.04925	6.59067	1.86706
AAEL013552	1.62143	1.49733	1.51029	1.05983	1.42222	1.31373	1.45608	0.396727	0.931055	1.0244	0.90348	0.19113	0.583051	0.770682	0.612086	0.608704	0.90712	0.766303	0.341166	0.655823	0.747958	0.609086	0.533651	0.573978	0.616168	0.682734	0.699088	0.698751	0.828211	0.727196	1.92597	0.880671	2.03327	1.23994	1.51996	1.77306	1.20354	1.37528	0.939306	1.3228	2.49298	1.82145	3.84557	2.74723	2.72681	4.15432	2.27915	3.78062	2.82854
AAEL013550	2.87036	3.57556	1.95952	3.1727	2.89454	3.49817	2.45198	3.05259	2.68291	2.92141	2.19874	2.88794	2.79928	2.34757	2.55838	2.0172	2.01511	1.88729	2.13255	2.01304	2.71184	2.20645	2.14422	2.81295	2.46886	2.98805	3.3873	3.43615	2.86494	3.16911	3.8858	3.33437	4.25596	3.293	3.69228	4.302	3.84226	2.50692	4.12591	3.69427	6.41908	4.79949	6.49333	5.85567	5.89189	8.40818	8.07128	10.2114	5.75878
AAEL021308	1.75851	1.55896	1.3433	1.29021	1.48775	1.52462	1.40331	0.922641	1.22259	1.26829	0.78234	1.1585	1.38309	1.02775	1.08792	1.11699	0.817417	1.21665	0.713943	0.966251	1.54009	0.8792	0.700823	1.32951	1.11241	1.69382	1.57964	1.04808	1.56758	1.47228	1.91594	1.69974	2.49078	1.72947	1.95898	2.5612	1.24567	2.26986	2.14432	2.05526	2.77853	2.98327	3.19602	2.77405	2.93297	3.88971	3.85804	3.56781	2.86696
AAEL013553	3.59933	4.8328	3.81666	3.73453	3.99583	3.69652	3.10957	2.57805	3.60264	3.24669	3.05224	3.63948	3.25382	3.11234	3.26447	2.51356	2.64361	3.08446	2.60452	2.71154	2.65226	2.84217	3.0718	2.59138	2.7894	3.05837	3.57789	2.95562	2.89083	3.12068	4.38209	3.40099	4.31925	2.95814	3.76512	5.09174	4.14294	4.09156	4.88455	4.5527	7.88828	6.60324	7.59137	6.90621	7.24728	12.0087	9.37122	11.4044	8.71169
AAEL013548	1.1587	0.748918	1.05576	0.694264	0.91441	1.37064	0.66842	0.904436	0.758088	0.925395	0.238894	0.691434	0.553062	0.665115	0.537126	0.787124	0.690312	0.189148	0.543845	0.552607	0.465885	0.458334	0.711008	0.670099	0.576331	1.38394	1.03375	0.674046	1.15652	1.06207	0.623209	0.839206	1.0481	0.822634	0.833286	1.06008	0.563454	0.569649	0.88511	0.769572	1.81971	2.03608	1.60434	1.69583	1.78899	2.85305	1.61271	2.08449	2.02349
AAEL013547	2.98064	3.36243	2.46376	2.40943	2.80407	3.13596	2.37107	2.2606	2.64546	2.60327	2.02858	1.86891	2.25434	2.38272	2.13364	1.78114	1.76609	1.67876	1.90433	1.78258	2.54019	1.95731	1.81394	2.31191	2.15583	3.5243	2.72988	3.76878	2.60925	3.15805	4.45734	3.92592	3.78283	4.08812	4.06355	3.90878	3.63852	4.03227	5.07585	4.16385	6.87514	5.81334	8.88761	7.05798	7.15852	9.48275	7.65208	7.50463	7.44141
AAEL013790	16.441	18.0051	13.7057	12.9542	15.2765	19.6048	14.0678	13.9525	13.4006	15.2565	20.125	23.1741	21.9747	22.3961	21.9175	23.4595	28.1855	25.244	24.2855	25.2936	27.4482	28.9298	29.7239	24.7053	27.7018	11.6501	19.0165	16.6196	12.4002	14.9216	6.86845	10.2966	8.13103	6.75491	8.01276	7.87818	10.3788	7.55818	7.06201	8.21929	10.397	11.0266	15.7414	16.528	13.4233	40.1322	34.2202	44.274	55.5127
AAEL013796	1.27928	1.53587	1.72348	1.46769	1.50158	1.41152	0.835504	1.17504	1.42539	1.21186	1.64232	0.854446	1.23064	1.43824	1.29141	0.836042	1.17922	1.25858	1.20464	1.11962	0.664217	0.790072	1.03993	1.24844	0.935666	1.15332	0.889435	1.0661	0.900994	1.00246	1.58547	1.16268	1.70538	2.00666	1.61505	1.88968	1.36506	1.5801	1.76267	1.64938	2.71119	2.3426	4.60362	4.19775	3.46379	6.24811	3.78527	4.97645	3.16256
AAEL027616	2.65613	2.40431	2.294	2.71326	2.51693	3.07622	2.37599	2.53711	2.52553	2.62871	1.24258	1.05323	1.24255	1.42915	1.24188	1.94719	1.64493	1.24113	1.53708	1.59258	1.96655	1.94933	1.88691	2.0223	1.95627	2.52866	2.39614	1.99192	2.01823	2.23374	4.09626	2.90821	2.76957	3.0946	3.21716	3.65662	2.37122	3.61039	3.21138	3.2124	4.78902	4.50173	4.78725	4.69739	4.69385	6.15984	5.97117	5.199	5.34844
AAEL002249	6.42793	4.72637	4.76203	4.60261	5.12974	4.32043	3.98982	4.70758	4.85318	4.46775	11.8938	12.904	11.1813	13.0723	12.2628	13.3145	12.5878	13.6373	11.172	12.6779	4.62051	5.64049	5.03131	3.0019	4.57355	2.12946	3.24199	2.1916	0.774182	2.08431	0.493901	1.78112	0.793312	0.993272	1.0154	0.883682	1.82617	0.612868	0.412276	0.93375	2.46173	1.98801	3.12277	3.14986	2.68059	15.2586	12.9312	20.189	22.8874
AAEL002253	0.154391	0.195943	0.104177	0	0.113628	0.0647	0.321231	0.034468	0.095729	0.129032	0.058115	0.170966	0.087443	0.25988	0.144101	0.212332	0.01388	0.054648	0.104334	0.0962985	0.069849	0.109049	0.013862	0.037753	0.0576282	0.026805	0.236122	0.091164	0.025935	0.0950065	0.325514	0.299801	0.259991	0.157482	0.260697	0.161941	0.206436	0.56481	0.218101	0.287822	0.616779	0.88934	0.425874	0.486656	0.604662	0.340267	0.917037	0.580985	0.615561
AAEL002276	0.257788	0.269022	0.034959	0.066464	0.157058	0	0.086562	0	0.137096	0.0559145	0	0	0	0	0	0	0	0	0.050099	0.0125247	0	0	0	0.083253	0.0208132	0	0.059214	0.039083	0.201141	0.0748595	0	0.060506	0.088028	0.058519	0.0517632	0	0.047599	0	0	0.0118998	0.084784	0.186437	0.085162	0.34409	0.175118	0.150201	0.13755	0.274666	0.062866
AAEL002261	0.792728	1.08327	0.693815	0.895017	0.866207	0.64413	0.579101	1.23402	0.69066	0.786978	1.72006	6.54767	2.59937	1.40305	3.06754	1.63785	2.84109	0.64936	1.51617	1.66112	1.50818	1.41162	0.618678	1.09715	1.15891	1.10446	1.32442	2.30539	1.24007	1.49358	1.53068	3.08354	1.65756	0.904079	1.79396	2.1492	1.82896	1.8615	1.42534	1.81625	3.59501	2.45271	2.51743	2.41431	2.74486	2.42277	4.20091	4.71318	1.69981
AAEL021693	0.043278	0.026313	0.019765	0	0.022339	0.045914	0	0	0	0.0114785	0	0.071003	0.017404	0	0.0221017	0.15501	0.227232	0	0	0.0955605	0	0.032691	0	0	0.00817275	0.02221	0	0	0	0.0055525	0	0	0.026594	0	0.0066485	0.114123	0.027182	0.018151	0	0.039864	0	0	0	0.072427	0.0181067	0	0	0	0
AAEL024257	1.0266	1.12802	0.48097	0	0.658899	16.3388	12.8223	2.31234	7.56184	9.75883	25.5361	0.551924	0.282422	22.3561	12.1816	24.8275	18.0642	15.0112	15.4746	18.3444	28.05	19.5284	0.661024	18.6467	16.7215	21.9446	22.2369	21.9582	1.21364	16.8383	3.45126	2.8477	2.16819	2.96437	2.85788	4.17485	3.07072	5.35079	2.07293	3.66732	2.03308	2.15838	47.9512	1.375	13.3794	1.35956	1.28254	2.33794	0.607475
AAEL002263	974.879	1663.9	568.808	866.641	1018.56	1279.46	1146.67	917.564	799.42	1035.78	1955.38	2023.25	1176.83	1780.25	1733.93	2351.9	1817.4	1378.52	1667.86	1803.92	2100.27	2607.01	1518.62	1674.15	1975.01	1813.59	2348.68	1687.72	2324.66	2043.66	3703.81	3895.69	3690.61	4296.89	3896.75	4920.5	5569.55	4220.06	3905.1	4653.8	4473.82	5001.86	4187.59	3918.23	4395.38	3155.08	5190.99	3707.78	3447.47
AAEL002254	0.284475	0.187751	0.133038	0.137505	0.185692	0.054652	0.030353	0	0.234233	0.0798095	0.129033	0.081807	0	0.079009	0.0724622	0.120636	0	0	0.092131	0.0531917	0	0.024886	0.135149	0	0.0400087	0.079353	0	0.079775	0	0.039782	0.03307	0.138391	0	0.116722	0.0720458	0.0352	0.131302	0	0.06355	0.057513	0.188831	0.109821	0.029512	0.270024	0.149547	0.017264	0.093276	0.044431	0.129638
AAEL002255	0.172281	0.13943	0	0.069081	0.095198	0.060958	0.101286	0.225232	0.236087	0.155891	1.46937	1.42243	2.54664	2.98201	2.10511	4.09191	4.6323	5.23858	5.08673	4.76238	4.48457	7.49533	6.48837	10.8134	7.32042	8.76879	8.4517	10.7248	10.5209	9.61654	2.66202	2.18622	2.84383	0.939495	2.15789	0.497921	0.946166	2.05688	1.15384	1.1637	0.621364	0.85591	0.486486	0.767287	0.682762	0	0.61758	1.06287	0.293242
AAEL002248	5.59219	5.86394	4.38223	4.87592	5.17857	5.42847	5.31961	5.10096	5.13245	5.24537	4.21236	3.05214	2.76583	2.79501	3.20634	1.83749	2.10477	2.67466	2.10167	2.17965	2.59442	2.91406	2.6853	3.50312	2.92422	4.99953	3.4363	4.23085	3.15796	3.95616	6.25422	5.79419	6.44378	6.25631	6.18713	8.73767	7.82789	7.14974	8.5518	8.06677	12.6909	12.5393	13.5788	14.6161	13.3563	14.8265	15.8598	13.9271	16.1048
AAEL002271	10.8751	12.658	10.3361	10.2662	11.0338	12.0841	11.3744	9.70139	10.4862	10.9115	15.1683	15.1561	15.5872	15.5733	15.3712	15.4739	14.8129	14.3521	13.7872	14.6065	12.8856	15.2384	13.8429	12.8352	13.7005	10.1468	12.8161	9.84253	10.1474	10.7382	9.96014	11.9628	9.75854	10.8534	10.6337	10.9508	12.8228	8.92223	10.2932	10.7472	15.8732	14.1292	15.607	20.4307	16.51	27.8953	29.2903	29.3079	32.3394
AAEL019956	9.28062	5.6193	6.26665	6.32744	6.8735	8.92122	5.72483	4.94338	6.2988	6.47206	12.9956	8.50279	6.77128	10.1729	9.61062	19.0806	14.9832	8.01442	12.4986	13.6442	23.049	15.3938	19.2111	15.5782	18.308	13.825	13.7984	12.7796	7.98194	12.0962	11.4139	8.79029	6.34663	7.84671	8.59937	10.9503	5.65236	7.49503	7.88362	7.99534	14.1347	11.6026	11.9245	10.5994	12.0653	15.3855	12.0834	10.4586	8.12725
AAEL022692	2.72056	2.6612	1.95629	2.23921	2.39431	1.48174	1.69354	0.801877	1.23816	1.30383	1.07589	1.12431	0.856246	0.960318	1.00419	1.19149	0.562645	0.417664	1.04285	0.803662	1.00023	1.47454	0.978832	1.1062	1.13995	1.321	1.96954	1.25924	1.16271	1.42812	1.79684	1.72631	1.96072	1.73445	1.80458	2.82034	2.09484	2.28364	3.59415	2.69824	6.46113	5.74726	6.42673	7.09502	6.43253	9.97641	8.16326	8.05302	6.53881
AAEL002269	5.6518	10.7041	4.86361	8.0152	7.30868	8.87246	12.1513	7.18609	7.62176	8.9579	6.694	9.64429	8.95192	12.6093	9.47487	5.41441	2.98757	2.34384	5.06498	3.9527	4.58782	11.6949	8.8032	11.4315	9.12935	46.622	28.2099	22.7241	29.3797	31.7339	47.8811	33.727	42.4522	45.7569	42.4543	61.5878	41.9114	49.9687	35.3788	47.2117	67.2788	49.7787	55.1032	50.799	55.7399	17.688	34.2381	13.1696	21.256
AAEL019776	11.9273	16.154	11.1933	11.3927	12.6668	15.0797	14.0126	12.6937	14.3196	14.0264	14.7873	12.5754	12.3957	9.89592	12.4136	12.4121	10.444	5.32634	8.63583	9.20455	11.5871	16.4933	9.97941	10.8677	12.2319	18.6581	21.4732	14.6825	18.388	18.3005	21.4217	20.3363	15.2893	16.3536	18.3502	19.025	18.2783	19.1432	16.3783	18.2062	21.2082	23.7815	19.4033	21.948	21.5853	24.1117	30.1944	17.1381	22.6642
AAEL026523	0	0	0	0	0	0	0	0	0	0	0	0	0	0	0	0	0	0	0	0	0	0	0	0	0	0	0	0	0	0	0	0	0	0	0	0	0	0	0	0	0	0	0	0	0	0.093557	0	0	0
AAEL002267	234.239	274.933	225.256	233.236	241.916	286.914	249.865	273.377	263.069	268.306	191.234	169.858	165.765	179.06	176.479	231.092	200.399	176.824	210.349	204.666	291.235	305.272	282.065	338.36	304.233	429.819	461.677	451.169	489.271	457.984	546.068	573.988	590.61	650.386	590.263	649.193	609.437	648.805	658.218	641.413	554.48	601.102	615.599	602.884	593.516	619.787	616.937	634.751	620.94
AAEL002257	3.70304	4.12679	2.83406	3.0294	3.42332	2.14567	2.61786	2.51088	2.39765	2.41802	1.91495	1.3904	1.00585	1.46669	1.44447	1.32828	1.63109	1.70868	1.88462	1.63817	1.15105	1.49354	1.64118	1.12272	1.35212	3.20828	4.15721	2.8684	3.38512	3.40475	4.28199	5.80271	5.32899	5.52628	5.23499	2.6822	4.27758	3.22987	4.58024	3.69247	7.47484	8.04697	7.91048	8.60924	8.01038	7.23295	5.70148	4.7947	8.70985
AAEL002270	0	0	0	0.048118	0.0120295	0.076362	0	0	0	0.0190905	0	0	0	0	0	0	0	0	0	0	0	0	0	0	0	0	0	0	0	0	0.277736	0	0	0	0.069434	0	0	0	0	0	0	0	0	0	0	0	0	0	0
AAEL002272	9.94624	14.9137	10.1817	11.1222	11.541	14.0728	13.23	12.8649	12.0248	13.0481	10.4053	9.24592	10.8009	10.7187	10.2927	9.8057	9.42813	7.67696	8.35392	8.81618	10.3442	12.905	9.15124	10.3235	10.681	10.6816	16.0163	10.4927	10.3006	11.8728	14.4808	16.0011	14.3125	13.0791	14.4684	16.0476	16.1722	13.3615	12.3123	14.4734	13.4929	20.0558	14.2735	16.3481	16.0426	21.105	25.4958	18.4535	22.6653
AAEL002250	0.869837	0.932447	0.966227	1.1038	0.968078	1.20766	0.707658	1.28705	0.879032	1.02035	0.522257	0.379087	0.628366	0.450633	0.495086	0.941309	0.385649	0.592787	0.54535	0.616274	0.577489	0.618737	0.805413	0.399369	0.600252	0.276815	0.6109	0.470193	0.229341	0.396812	0.30391	0.459737	0.273696	0.2184	0.313936	0.145237	0.568277	0.259027	0.401886	0.343607	0.467722	0.895856	0.594118	0.952189	0.727471	4.35828	2.18605	4.9129	5.05791
AAEL002258	4.75288	5.79297	5.67754	5.1335	5.33923	6.34528	5.99698	6.39344	5.51318	6.06222	4.29545	5.00038	4.51731	4.14445	4.4894	5.20198	6.2146	6.14883	5.16331	5.68218	4.42993	5.67316	6.258	4.63557	5.24916	4.6007	5.57081	4.91313	5.02119	5.02646	4.13005	4.42378	4.33269	3.51441	4.10023	5.40153	3.86973	4.45344	4.72192	4.61166	9.06561	7.00054	7.84494	9.06288	8.24349	14.7913	11.9008	14.1457	12.9327
AAEL002279	6.74648	7.97497	7.15286	6.96022	7.20863	7.47488	7.88046	6.03007	7.16643	7.13796	4.11375	5.18326	4.41857	4.39796	4.52838	5.00265	5.17007	4.46184	4.42221	4.76419	5.02547	5.3713	4.05543	4.87718	4.83235	4.17611	4.8671	3.29481	3.86358	4.0504	2.62102	4.75684	3.71669	4.12468	3.80481	4.71922	4.12759	5.18221	5.42397	4.86325	9.51753	7.83996	8.73449	7.3935	8.37137	14.2248	11.6302	14.4335	12.9145
AAEL025426	0	0.152359	0	0.037834	0.0475483	0	0	0.026541	0	0.00663525	0	0	0	0.173332	0.043333	0.009336	0	0	0	0.002334	0.012042	0	0	0	0.0030105	0.045511	0	0.210019	0	0.0638825	0.099616	0	0.007136	0	0.026688	0.335747	0	0.212694	0	0.13711	1.10119	0.43145	0.8399	0.360398	0.683235	0.65742	0.786952	3.39351	0.199416
AAEL021775	0.677786	1.54625	0.613892	1.38431	1.05556	0.909575	1.15276	1.0095	0.900746	0.993146	0.397965	0.918323	0.531999	1.04023	0.722129	1.33252	0.811735	0.40466	1.03539	0.896075	0.382238	1.16283	1.23506	0.852183	0.908079	0.630249	0.82495	1.30312	1.03515	0.948367	1.09027	1.51612	0.698123	1.917	1.30538	1.14152	1.66511	0.953345	0.936449	1.17411	3.15994	3.2384	1.12319	3.26766	2.6973	3.45531	2.23115	2.70934	3.69677
AAEL002260	6.95383	8.59824	6.35483	7.10696	7.25347	7.67476	7.05464	6.72463	6.75472	7.05219	8.573	8.64619	8.84396	8.52426	8.64685	7.23778	7.01575	4.38711	5.73048	6.09278	6.56675	8.181	6.74671	7.09794	7.1481	6.34488	10.1801	5.98283	5.40272	6.97763	6.13108	8.33653	6.06694	5.84244	6.59425	5.94269	7.37801	5.65052	5.47306	6.11107	9.36973	11.02	8.08514	11.4013	9.96904	14.5251	18.403	13.0426	16.8751
AAEL019726	0.135457	0.164407	0.26068	0.063313	0.155964	0.095411	0.102361	0.029391	0.034545	0.065427	0.015893	0.03153	0.033344	0.122137	0.050726	0.03058	0	0.091849	0.059923	0.045588	0.057371	0.048168	0.023646	0.059465	0.0471625	0.097686	0.05219	0.056007	0.043506	0.0623472	0.12578	0.116583	0.192961	0.142459	0.144446	0.327966	0.044994	0.149187	0.182818	0.176241	0.500118	0.497897	0.456191	0.630779	0.521246	0.2876	0.165252	0.275585	0.285914
AAEL004591	0.008319	0.047219	0.058358	0	0.028474	0.011814	0.014771	0	0	0.00664625	0.036993	0.087499	0.013314	0.020964	0.0396925	0.012005	0.003969	0	0.128399	0.0360933	0	0.007849	0.034496	0.012417	0.0136905	0	0.013164	0.025979	0	0.00978575	0	0.040362	0.006959	0	0.0118303	0	0	0.01651	0	0.0041275	0.027035	0.031283	0.013659	0.011178	0.0207888	0	0.040869	0.038374	0
AAEL023691	0.334361	0	0	0.342834	0.169299	0.179002	0	0	0.332056	0.127765	0	0	0	0	0	0	0.344648	0	0	0.086162	0.204499	0	0	0	0.0511247	0	0.626337	1.6364	1.03416	0.824225	0.669273	1.31067	1.93548	0.30457	1.055	1.02235	1.78445	3.57992	0.506953	1.72342	3.89035	2.21282	3.11528	0.750221	2.49217	2.86553	2.46526	2.21154	1.324
AAEL022454	1.69437	1.18973	0.392947	1.00633	1.07084	0.956055	0.303326	0.345815	0.857292	0.615622	0.248714	0.59071	0.617129	0.576502	0.508264	0.606001	0.608982	0.171491	0.477346	0.465955	0.041548	0.61263	0.549749	0.139429	0.335839	0.171098	0.412359	0.388717	0.852788	0.45624	0.873873	2.06165	2.63399	1.21798	1.69687	3.68995	3.0749	4.27696	1.26053	3.07558	5.98378	5.47917	5.97827	6.54003	5.99531	7.40593	5.82467	6.39599	2.65031
AAEL004583	26.2547	20.9823	19.4319	23.4025	22.5178	26.7983	25.2716	20.1779	22.9983	23.8115	5.38855	6.77075	6.60125	5.82613	6.14667	3.07311	2.52697	1.60957	2.53222	2.43547	2.91816	3.43093	2.91931	2.95698	3.05635	1.92424	3.59952	1.60205	2.87003	2.49896	9.70363	7.76808	8.00819	7.02702	8.12673	13.1335	10.5276	11.2939	14.6274	12.3956	32.3282	18.9709	37.2546	40.597	32.2877	56.8491	38.7218	51.0509	56.5732
AAEL004586	56.3633	73.9779	43.1573	47.8191	55.3294	69.8147	54.9302	38.2568	49.9765	53.2446	38.7478	36.9499	34.4059	39.0145	37.2795	42.3584	42.4087	31.4349	33.0723	37.3186	36.1526	52.9448	37.5064	35.9102	40.6285	38.4607	63.1561	35.2538	38.768	43.9097	39.7762	51.7684	36.2943	33.0664	40.2263	45.3552	47.6323	36.4271	37.9579	41.8431	76.0138	72.5634	78.9635	80.1619	76.9256	129.944	114.013	98.9818	106.929
AAEL004592	0.455928	1.23357	0.142055	0.414528	0.56152	1.23725	1.04768	0.959254	0.380249	0.906107	3.72202	2.78618	2.52425	2.21217	2.81116	1.92899	1.08522	0.566713	0.913558	1.12362	1.10911	0.802806	0.745337	0.521117	0.794592	0.702874	1.26841	0.568931	0.404873	0.736272	1.49092	1.46638	1.1637	0.982715	1.27593	1.5593	1.63684	1.30042	1.17989	1.41911	3.60442	3.0115	3.47035	3.00631	3.27315	5.73958	5.0051	4.0923	2.7904
AAEL026050	0.282131	0.167546	0.153204	0.121095	0.180994	0.215558	0.111927	0.140001	0.120553	0.14701	0.038956	0	0.050886	0.023338	0.028295	0.034902	0.03784	0.034692	0.072623	0.0450142	0.040155	0.081864	0.070957	0.019927	0.0532257	0.064817	0.09655	0.122172	0	0.0708847	0.048684	0.049135	0.152131	0.050022	0.074993	0.222031	0.049109	0.057092	0.131889	0.11503	0.286751	0.208584	0.32814	0.214355	0.259458	0.359384	0.29916	0.186402	0.136221
AAEL024992	0.230299	0.225118	0.126607	0.338285	0.230077	0.499913	0.310704	0.320975	0.117176	0.312192	0.239586	0.042521	0.125471	0.0717	0.119819	0	0.070599	0.132322	0.117029	0.0799875	0.144098	0.218517	0.1541	0.092017	0.152183	0.185933	0.099027	0.167446	0	0.113101	0.608693	0.270269	0.242092	0.339697	0.365188	0.418419	0.133412	0.178609	0.296838	0.256819	0.579904	0.424815	0.324817	0.290979	0.405129	0.749455	0.502002	0.323527	0.200083
AAEL028921	10.4574	0	0	0	2.61434	0	0	0	0	0	0	0	0.174532	0	0.043633	0	0.509336	0	0	0.127334	0	0.581196	0.229595	0.428283	0.309769	0	0	0	0	0	0	0	0	0.169336	0.042334	0	0.890005	0	0	0.222501	0	0	1.98908	0	0.49727	0	0.462893	0	1.4433
AAEL019313	0.028392	0.036394	0.59412	0.1488	0.201927	0.102699	0.052875	0.025136	0.149721	0.0826077	0.624369	0.153832	0	0.01342	0.197905	0.189478	0	0.4334	0.39393	0.254202	0.358647	0	0	0	0.0896617	0.873788	0.133961	0.036401	0.127665	0.292954	0.070699	0.026431	0.086623	0	0.0459382	0.150465	0	0.066308	0.065415	0.070547	0.309478	0.262143	0	0.532017	0.275909	0.230193	0	0.147759	0
AAEL028047	13.6436	16.712	14.2194	13.5114	14.5216	15.2258	15.4771	14.5953	14.3958	14.9235	12.8492	12.9172	11.7312	13.2886	12.6966	11.1966	13.12	9.57944	12.8615	11.6894	11.728	11.8995	12.2147	12.5055	12.0869	8.03671	8.81365	8.67612	7.8963	8.35569	7.82945	8.87479	6.8088	8.64348	8.03913	9.25559	9.22981	6.72163	8.87787	8.52122	15.3463	10.8192	15.7025	16.9201	14.697	24.6018	20.5042	24.5711	25.3088
AAEL004589	18.1324	22.7103	14.5854	16.8183	18.0616	62.0076	67.0156	88.7394	82.4787	75.0603	27.4665	26.3981	28.3635	26.5005	27.1822	31.6661	28.1075	20.4996	19.0589	24.833	20.036	31.3388	21.8675	17.7935	22.7589	16.1173	25.9082	14.1825	16.0155	18.0559	20.2133	19.1037	16.4411	18.0813	18.4599	32.915	32.2864	33.9164	29.205	32.0807	65.2462	50.7838	62.559	62.3856	60.2437	62.9123	65.5715	51.484	54.957
AAEL004588	0.35166	0.349593	0.242078	0.527767	0.367775	0.092929	0.140497	0.116909	0.180489	0.132706	0.284771	0	0.036218	0	0.0802472	0	0	0	0	0	0	0	0.133842	0.032889	0.0416827	0.068187	0.264279	0.139423	0.131948	0.150959	0.225248	0.107086	0.036865	0.12137	0.122642	0	0.038289	0.145886	0.107986	0.0730402	0.733551	0.128708	0.380391	0.501166	0.435954	0.235372	0.326037	0.527888	0.402903
AAEL010107	5.22617	6.21705	4.86464	5.25363	5.39037	6.20864	4.71352	6.46117	5.42434	5.70192	8.05957	9.19416	9.67895	9.60188	9.13364	7.00328	7.52319	8.7415	7.42021	7.67205	6.08033	5.83944	7.01093	6.25483	6.29638	5.73905	6.90832	5.65109	5.56593	5.9661	4.90759	4.39367	4.50283	5.19114	4.74881	5.27441	5.11929	5.78148	6.72621	5.72535	9.05404	8.64425	9.27853	10.6462	9.40576	16.0571	14.1751	15.6677	18.3134
AAEL014649	5.3197	7.69366	6.19228	5.63273	6.20959	7.32637	5.56454	6.30855	5.75501	6.23862	11.1159	10.8458	9.53643	11.0687	10.6417	10.1876	10.2835	12.7747	9.88242	10.7821	9.55106	9.50512	8.41553	8.68557	9.03932	6.0079	6.44696	6.44621	5.83288	6.18349	3.69318	4.9702	4.69376	4.03955	4.34917	4.31983	4.92562	4.21643	4.32929	4.44779	7.36329	7.68011	8.30818	8.39532	7.93673	16.8228	14.0893	17.9675	20.4152
AAEL026531	0.017485	0.214597	0.01743	0.073706	0.0808045	0.077795	0	0.065248	0.101677	0.06118	0	0.020587	0.035466	0.095416	0.0378672	0	0	0.019429	0.111916	0.0328362	0.079871	0	0.019713	0.01379	0.0283435	0	0.042172	0.164265	0.063867	0.067576	0	0.07271	0	0.043618	0.029082	0.103282	0.032108	0.015472	0.074946	0.056452	0.298889	0.138965	0.138012	0.29711	0.218244	0.141313	0.245682	0.434129	0.302821
AAEL010110	0	0	0	0	0	0	0	0	0	0	0	0	0	0	0	0	0	0	0	0	0	0	0	0	0	0.167364	0	0	0	0.041841	0	0	0	0	0	0.257648	0.070485	0	0.06657	0.0986758	0	0	0	0	0	0	0	0	0.278017
AAEL015404	154.019	181.441	156.613	158.648	162.68	65.829	96.7495	80.7623	127.824	92.7912	53.4686	44.5727	55.7905	43.1535	49.2463	62.146	48.9823	53.447	71.7819	59.0893	43.3193	49.28	49.5197	47.3097	47.3572	65.7995	81.7204	66.605	87.5469	75.4179	113.694	123.989	147.822	121.101	126.651	62.0103	44.6372	54.0242	97.262	64.4834	348.08	223.853	348.092	339.366	314.848	176.87	99.9938	150.609	175.033
AAEL017132	8.49359	24.7247	7.51564	5.9416	11.6689	11.9753	9.9354	5.17559	5.93246	8.25469	14.934	12.4795	5.87645	6.15823	9.86204	11.4566	2.70784	7.59275	10.1848	7.9855	9.21522	9.92708	3.80803	3.46207	6.6031	5.41869	7.04547	2.56408	6.38612	5.35359	17.5818	19.2148	18.2543	12.4672	16.8795	27.9769	26.9124	25.0056	19.0743	24.7423	27.3521	36.9881	28.2187	39.0444	32.9008	40.5315	53.1987	44.0012	25.3685
AAEL025559	0	0	0	0	0	0	0	0	0	0	0	0	0	0	0	0	0	0	0	0	0	0	0	0	0	0	0	0	0	0	0	0	0	0	0	0	0	0.042148	0	0.010537	0	0	0	0	0	0	0	0	0
AAEL010109	6.29094	5.85942	3.91887	6.97286	5.76052	5.53932	6.08308	19.5531	6.47627	9.41293	145.352	149.158	122.74	175.937	148.297	164.911	139.998	145.419	145.746	149.018	141.241	105.207	151.018	100.139	124.401	47.8551	76.2989	79.3271	46.8158	62.5742	23.813	30.0422	20.6785	30.962	26.3739	24.5456	21.5217	23.787	36.0097	26.466	29.0208	26.6661	23.3748	27.0444	26.5265	16.8523	16.641	15.4023	11.3211
AAEL010108	4.28715	5.42907	4.06604	3.63808	4.35508	4.12916	3.97171	2.99471	3.70033	3.69898	2.38755	2.19874	2.54644	2.35109	2.37096	2.44364	2.17667	1.89546	1.94442	2.11505	1.67297	3.24806	1.81129	2.07836	2.20267	3.06458	3.43354	2.91892	3.11119	3.13206	3.32723	3.7605	3.4547	4.4271	3.74238	4.76718	4.66839	4.73173	5.62614	4.94836	9.05327	8.22653	8.86374	8.67999	8.70589	11.0375	10.9927	10.0014	9.86492
AAEL025513	0.339092	0.441617	0.16005	0	0.23519	0.097348	0.402893	0.08962	0.187515	0.194344	0.09983	0.190312	0	0	0.0725355	0.065732	0	0.108003	0.121921	0.073914	0.14992	0	0	0.251895	0.100454	0	0.200469	0	0.034095	0.058641	0.165113	0.222353	0.141457	0.053763	0.145672	0.26015	0.059363	0.190517	0.215796	0.181456	0.376343	0.141025	0.039317	0.453835	0.25263	0.457831	0.335584	0.314112	0.353563
AAEL022847	0	0	0	0	0	0	0	0	0	0	0	0	0	0	0	0	0	0	0	0	0	0	0	0	0	0	0	0	0	0	0	0	0	0	0	0	0	0	0	0	0	0	0.063633	0	0.0159082	0	0	0	0
AAEL010112	9.12114	11.2131	10.0227	10.2412	10.1495	10.8788	7.72045	11.4869	12.9331	10.7548	8.74408	11.6432	9.09749	11.5795	10.2661	7.96838	13.0428	11.5023	12.7096	11.3058	11.0942	17.0069	14.9529	13.5924	14.1616	12.0722	14.7914	12.0528	12.257	12.7933	9.75598	11.0532	8.78952	11.2886	10.2218	11.8511	9.97457	10.6699	10.3247	10.705	20.225	13.7576	19.1035	17.1931	17.5698	26.6505	21.1333	24.3876	28.5114
AAEL010097	0	0.34358	0.045674	0.065018	0.113568	0	0	0.040268	0.021756	0.015506	0.101366	0.013689	0.078514	0.001419	0.048747	0.046349	0.051552	0.075986	0.021782	0.0489173	0.012771	0.046003	0.102626	0.114428	0.068957	0.123237	0.124678	0.024636	0.047517	0.080017	0.045943	0.094637	0.050849	0.147311	0.084685	0.051344	0.103521	0.040612	0.514572	0.177512	3.19863	0.613608	0.164105	3.86098	1.95933	0.368419	0.058308	0.108965	0.103881
AAEL010095	42.8612	39.6499	35.7522	40.5049	39.692	41.3802	32.4862	38.4083	35.1038	36.8446	155.208	83.8937	126.707	132.524	124.583	110.635	85.4908	115.973	97.044	102.286	77.1204	60.5084	57.6187	65.7741	65.2554	64.0012	46.3408	60.8379	62.2264	58.3515	65.7325	60.0257	61.2514	53.0827	60.0231	68.7678	49.278	67.3658	68.1818	63.3983	124.713	90.9814	132.208	122.628	117.633	112.31	72.914	100.115	63.381
AAEL010099	75.3665	151.473	70.6964	64.0302	90.3915	113.985	92.5927	75.3598	77.2323	89.7926	62.6709	57.2584	46.5155	48.446	53.7227	69.1877	63.0443	48.2797	58.5711	59.7707	68.1995	118.39	66.8305	84.0431	84.3657	111.77	129.201	102.077	111.952	113.75	132.896	147.347	148.808	146.069	143.78	122.504	150.383	145.409	138.232	139.132	195.782	217.141	245.374	227.614	221.478	398.574	363.338	357.5	305.252
AAEL024732	0	0.00945	0.033689	0	0.0107847	0.0127	0	0	0	0.003175	0	0	0	0	0	0.034532	0.019172	0	0.047178	0.0252205	0	0.018206	0.020256	0.033485	0.0179867	0.138596	0	0.180683	0.034151	0.0883575	0.045749	0.089215	0.155523	0.028244	0.0796827	0.150538	0.061228	0.090768	0.102373	0.101227	0.107417	0	0.079086	0.097212	0.0709287	0.072494	0	0	0.039067
AAEL027693	0	0	0	0	0	0	0	0	0	0	0	0	0	0	0	0	0	0	0.148758	0.0371895	0	0	0	0.1236	0.0309	0	0.136746	0.160682	1.08044	0.344467	0.320372	0.345842	1.14757	0.34795	0.540434	0.974237	0.883988	0.606496	1.25594	0.930166	0.461765	0.624166	0	0	0.271483	0	0	0.139653	0.360088
AAEL010105	1.58419	1.17057	1.10145	1.1433	1.24988	1.33735	0.669729	1.04796	0.789322	0.961089	1.7915	1.07552	1.93429	1.61428	1.6039	1.56694	1.10363	0.384992	0.459971	0.878883	0.508454	0.451786	0.706028	0.371122	0.509347	0.725596	0.814034	0.77487	0.896268	0.802692	1.09691	1.56231	1.01867	0.999701	1.1694	1.13312	1.2776	0.884527	1.06653	1.09044	2.78811	2.18081	2.32184	1.53773	2.20712	4.85786	2.83266	3.054	2.51357
AAEL010102	0.605337	0.482142	0.262903	0.217725	0.392027	0.691196	0.46606	0.314607	0.338401	0.452566	0	0.20457	0.103449	0.130858	0.109719	0.188789	0	0.032636	0.028452	0.0624692	0.279769	0.03235	0.204414	0.258772	0.193826	0.163701	0.302928	0.30027	0.125071	0.222993	0.378756	0.592484	0.273698	0.235534	0.370118	0.224091	0.484691	0.051714	0.394257	0.288688	0.686389	0.374504	0.578641	0.58737	0.556726	0.422793	0.640002	0.700381	0.784093
AAEL014246	2.56493	2.76043	3.32722	4.59896	3.31289	1.92458	2.37136	1.4027	2.48031	2.04474	1.648	2.45458	2.42277	1.91726	2.11065	0.441476	2.20424	2.11533	1.51157	1.56816	0.46722	1.85556	1.94339	1.21698	1.37079	1.22762	1.20517	0.817179	1.37647	1.15661	1.24188	1.36428	2.00503	1.2284	1.4599	2.35077	1.61961	2.28738	3.83082	2.52215	9.82025	5.09683	13.5287	16.649	11.2737	10.9715	10.5401	22.6574	27.8154
AAEL027567	1.27123	1.55255	1.20564	0.980738	1.25254	2.11487	1.36001	1.43352	1.61585	1.63106	3.64828	2.85854	4.39011	3.45197	3.58723	2.37794	2.44365	1.8272	1.91168	2.14012	1.91946	2.40123	2.1963	2.2169	2.18347	2.26403	2.97785	2.08529	2.35953	2.42168	2.10231	2.16518	2.48889	2.06412	2.20513	2.26884	2.61487	1.46949	1.70514	2.01459	2.79597	2.27192	1.97464	2.53426	2.3942	2.86829	2.76463	2.71147	3.61322
AAEL007988	10.5346	16.3338	12.7687	14.8489	13.6215	13.7202	13.0977	12.4344	17.337	14.1473	16.8217	16.4291	15.6262	20.6112	17.372	17.5934	19.6293	18.1346	17.2906	18.162	17.0919	16.2841	14.8468	17.9142	16.5342	16.5645	16.496	17.1014	14.704	16.2165	11.5028	17.5274	11.538	13.8646	13.6082	14.6369	17.8233	16.6738	14.3898	15.881	24.1388	21.2805	27.117	26.0818	24.6545	37.111	34.6124	31.8951	37.5455
AAEL008005	7.03594	8.9349	6.78419	6.77886	7.38347	7.78635	6.68621	5.13134	7.17077	6.69367	4.59739	4.85476	5.68831	4.3282	4.86717	4.65853	5.23975	3.18131	4.33666	4.35406	5.15154	5.93321	5.20142	6.29846	5.64615	6.22243	8.21578	7.61463	6.11467	7.04187	7.82692	7.57378	6.0777	6.91614	7.09863	8.03141	8.16604	7.47582	7.43491	7.77705	10.0417	8.41473	10.0876	12.4083	10.2381	14.171	11.7564	13.3048	16.0682
AAEL007994	1.74565	1.75987	1.54006	1.85295	1.72463	2.54715	1.58423	2.06414	1.43058	1.90653	1.90984	0.538314	1.2442	1.2652	1.23939	1.01549	2.0019	2.3656	1.38372	1.69168	1.56189	2.14573	2.95602	1.15377	1.95435	1.15725	1.62657	2.96909	2.24211	1.99875	2.7366	3.03273	1.54245	2.03469	2.33662	1.3555	1.02957	1.17554	1.18815	1.18719	2.44201	2.16517	2.97938	1.7634	2.33749	4.62848	3.62663	4.49268	4.26495
AAEL008006	88.2602	127.768	62.1601	77.2073	88.8489	110.115	93.69	72.6146	80.8833	89.3258	138.909	142.305	88.5696	120.39	122.543	140.36	191.787	117.413	142.884	148.111	149.124	262.685	145.184	191.745	187.185	236.548	312.864	259.363	365.977	293.688	768.478	667.335	786.088	801.657	755.889	922.932	737.401	853.993	882.559	849.221	885.966	837.212	887.524	837.706	862.102	725.576	776.676	607.668	468.084
AAEL007996	2.03855	2.65355	1.68341	2.31171	2.17181	2.51121	2.55076	1.89339	1.8671	2.20562	0.620921	0.874577	1.55415	0.896773	0.986605	1.18893	0.827408	0.540123	1.01572	0.893044	1.13786	1.45146	1.27176	1.52479	1.34647	2.34599	2.73698	2.05701	1.95244	2.27311	3.87377	2.9547	3.12533	2.51731	3.11778	3.41657	3.17611	3.97782	3.07974	3.41256	5.65583	4.44278	5.90077	5.41273	5.35303	7.91076	5.77785	7.08793	4.92991
AAEL008000	29.2372	29.8158	26.9592	30.2395	29.063	31.7515	29.7736	29.1101	27.8812	29.6291	47.3451	50.7	49.4055	54.6256	50.519	47.583	58.7641	46.4833	50.5707	50.8503	48.0327	45.7617	48.329	48.0576	47.5452	24.0486	27.9397	26.556	23.0846	25.4072	20.3574	26.3427	18.6414	18.1415	20.8707	19.215	21.5789	18.6116	18.4688	19.4686	29.083	25.0279	26.989	31.3479	28.1119	46.0519	39.8025	41.8345	45.188
AAEL008002	106.743	131.94	108.823	106.517	113.506	116.467	110.994	106.924	117.509	112.973	103.296	102.281	104.808	113.149	105.884	124.967	116.155	132.035	134.849	127.002	160.445	164.201	176.137	169.991	167.694	183.158	196.916	205.775	182.801	192.162	120.713	162.68	116.162	106.973	126.632	70.5735	121.457	83.8938	59.9989	83.9809	85.9581	91.6197	91.5747	107.447	94.15	190.573	171.582	196.604	230.624
AAEL007990	17.7703	16.5275	12.5564	13.1019	14.989	19.9361	14.833	13.4591	14.4909	15.6798	11.9479	9.12752	10.8402	11.556	10.8679	14.2641	11.3729	6.72352	9.29928	10.415	12.4954	12.3518	9.32753	9.03378	10.8021	5.8315	7.01416	9.47117	6.89861	7.30386	5.52131	12.2703	5.17461	10.5681	8.38359	11.352	12.0637	8.66093	8.01923	10.024	15.3134	15.1338	11.7039	11.24	13.3478	18.5321	18.5853	16.2437	19.9047
AAEL007987	22.8849	20.4439	19.0178	21.5175	20.966	24.9095	20.0842	22.0068	20.7124	21.9282	31.8326	32.0332	28.3781	37.1136	32.3394	42.347	48.1253	33.5259	36.0439	40.0105	41.7587	41.2473	41.111	43.6328	41.9374	26.4272	26.9747	28.5121	23.3312	26.3113	15.8159	13.2711	12.6642	13.4221	13.7934	15.1716	11.8243	12.8198	13.4456	13.3153	21.4709	15.8018	17.4928	17.9254	18.1727	32.5864	23.611	25.307	28.3579
AAEL007989	0	0.038015	0.032363	0.045942	0.02908	0.042569	0.059495	0.075846	0.107363	0.0713182	0.057581	0.038162	0	0.05315	0.0372232	0.066014	0.055257	0.090189	0	0.052865	0.038216	0.137401	0	0	0.0439042	0	0	0.068986	0.033785	0.0256928	0.044245	0.106211	0.027361	0.026862	0.0511697	0.05436	0.047992	0	0.014077	0.0291073	0.04783	0	0	0.1141	0.0404825	0.092391	0.149968	0.029723	0.205367
AAEL007997	0.49587	0.315556	0.300981	0.310235	0.35566	0.499987	0.224369	0	0	0.181089	0.211955	0.084335	0.212862	0.193675	0.175707	0	0	0.199309	0.347775	0.136771	0	0.222543	0.040446	0	0.0657472	0.192394	0.297801	0.114073	0.183626	0.196973	0.068282	0.334135	0.28541	0.192107	0.219983	0.099931	0.229576	0.183694	0.059606	0.143202	0.685518	0.97192	1.14732	0.757812	0.890643	0.356117	0.091619	0.928794	0.52732
AAEL008001	1.33829	1.30535	1.00712	0.489974	1.03518	0.57587	0.955725	0.526408	0.450962	0.627241	0.521145	0.091782	0.635832	0.174633	0.355848	0.640514	0	0.332604	0.655512	0.407158	0.187452	0.817044	0.479254	0.256433	0.435046	0.755033	0.444301	0.119276	0.253981	0.393148	0.326732	1.33138	0.678846	0.995136	0.833023	0.239272	0.73028	0.467017	1.3255	0.690519	2.55559	1.85391	1.77158	2.61578	2.19921	2.54664	3.09972	1.625	2.35086
AAEL008007	2.76702	2.30644	1.80106	2.91323	2.44694	1.72543	2.10592	2.51726	3.0539	2.35063	0.808691	0.81547	1.39574	0.697561	0.929366	1.16956	0.696964	0.694829	0.470378	0.757932	0.243222	1.15563	0.48793	0.412398	0.574796	0.55577	1.4382	0.308948	0.833062	0.783994	1.53961	1.38548	1.6384	2.29554	1.71476	2.579	1.96767	1.60692	3.02161	2.2938	7.27068	6.72065	6.82304	8.00235	7.20418	5.79925	5.04613	7.24875	4.52446
AAEL026740	0	0.107156	0.179032	0.223613	0.12745	0.046536	0	0	0.086679	0.0333038	0	0	0.100593	0	0.0251483	0.063055	0	0	0	0.0157637	0	0	0.132329	0	0.0330823	0	0	0	0	0	0.083959	0	0.110021	0	0.048495	0	0	0.133627	0	0.0334067	0.122236	0.16486	0.151368	0.088364	0.131707	0	0	0	0.150243
AAEL011452	0.066973	0.088897	0	0.119185	0.0687637	0	0.075161	0.040202	0.041905	0.039317	0	0.101307	0.144536	0.07043	0.0790683	0.043301	0	0	0	0.0108252	0	0.04612	0	0.07749	0.0309025	0.2548	0.03597	0.047944	0.110106	0.112205	0.05863	0	0	0.125208	0.0459595	0	0	0	0	0	0.246194	0.056986	0	0.060885	0.0910163	0.122428	0	0	0.207736
AAEL011448	0.077589	0.101295	0.121062	0.138543	0.109622	0	0	0	0.165549	0.0413873	0	0.052651	0.04186	0	0.0236277	0	0	0	0.164613	0.0411533	0	0	0.054323	0	0.0135808	0	0	0.082015	0	0.0205038	0.033731	0	0	0	0.00843275	0	0	0	0	0	0.048619	0	0	0	0.0121548	0	0	0	0
AAEL011460	0	0.038722	0	0	0.0096805	0	0	0.107947	0	0.0269868	0	0	0.25543	0	0.0638575	0	0	0.100292	0	0.025073	0	0.172879	0.124161	0	0.07426	0	0	0	0	0	0	0	0	0	0	0	0	0	0	0	0	0	0	0.324344	0.081086	0	0	0	0.137962
AAEL011447	3419.4	3526.1	3315.09	3456.06	3429.16	3626.32	3444.86	3316.42	3447.71	3458.82	2997.89	3119.6	2970.62	2732.82	2955.23	2838.93	2786.86	3022.08	2832.12	2870	2731.83	3036.51	2884.97	2411.31	2766.16	2456.01	2709.56	2630.86	2340.4	2534.21	2443.44	2605.86	2583.1	2294.63	2481.76	2481.74	2626.94	2470.49	2309.46	2472.16	2537.22	2219.39	2495.56	2346.56	2399.68	3772.46	3100.52	3569.17	3783.31
AAEL011462	5.76807	7.4534	5.4255	5.36723	6.00355	5.51462	5.20407	5.55119	5.72553	5.49885	8.68926	10.1185	7.17918	9.74946	8.93411	9.72927	9.14197	10.8488	10.0906	9.95266	8.48644	9.33126	8.92657	8.19102	8.73382	7.70087	7.98243	8.02539	7.1402	7.71222	9.69696	7.34672	9.42034	7.17392	8.40948	9.15404	9.44958	8.55167	9.27846	9.10844	11.6425	12.3451	16.5633	14.0283	13.6448	22.0218	16.4192	18.7029	17.5873
AAEL011463	0.082014	0.19823	0	0	0.070061	0.139311	0.29191	0	0	0.107805	0	0.08893	0	0	0.0222325	0.076789	0.044103	0.085664	0.036588	0.060786	0	0	0.043899	0	0.0109748	0.042586	0.162987	0.108845	0.197914	0.128083	0.102402	0.099088	0.032924	0.140123	0.0936343	0.186042	0.03587	0.134019	0.083898	0.109957	0.282658	0.072449	0.092653	0	0.11194	0.138971	0.150513	0.047689	0
AAEL011459	0.181147	0.103894	0.125159	0.114286	0.131122	0.131202	0.076192	0.035781	0.079238	0.0806032	0.05934	0.191563	0.181029	0.098387	0.13258	0.103277	0.181377	0.159449	0.086017	0.13253	0.057201	0.084017	0.089046	0.148918	0.0947955	0.044116	0.117908	0.134479	0.101429	0.099483	0.124515	0.136276	0.117748	0.157234	0.133943	0.108422	0.064314	0.059593	0.138959	0.092822	0.511218	0.388443	0.240453	1.04423	0.546087	1.3889	0.69941	1.91341	0.791094
AAEL025322	0	0.10821	0	0	0.0270525	0	0	0	0.141889	0.0354722	0	0	0	0	0	0	0	0	0	0	0	0	0	0	0	0	0	0	0	0	0	0	0	0	0	0	0	0	0	0	0	0	0	0	0	0	0	0	0
AAEL024835	0.517458	0.208231	0	0	0.181422	0.694737	0	0.136361	0	0.207774	0.517578	0.283171	0	0	0.200187	0.158245	0.225439	0.429387	0.07695	0.222505	0	0.224514	0	0.19053	0.103761	0	0.280358	0.406554	0.100225	0.196784	0.220964	0.348503	0	0.193471	0.190734	0.598277	0	0.209472	0.141542	0.237323	0.477194	0	0	0.110127	0.14683	0.346053	0.630641	0.849068	0.071027
AAEL013517	0	0	0	0	0	0	0	0.135618	0	0.0339045	0	0	0	0.511506	0.127877	0.185367	0.30546	0.640719	0	0.282886	0.105069	0	0	0.215943	0.080253	0	0.490366	0.631708	0.253064	0.343784	0	0.152782	0.256585	0.514093	0.230865	0.31875	0	0.441203	0.253386	0.253335	0	0.511782	0.353012	0.403454	0.317062	0.546535	0.126071	0.482259	0.233592
AAEL020725	0.085282	0	0	0	0.0213205	0.066997	0	0.080898	0.17158	0.0798687	0	0	0.1362	0.346885	0.120771	0.10771	0	0.117723	0	0.0563582	0	0	0	0	0	0.092004	0	0	0	0.023001	0.144384	0	0.096224	0	0.060152	0	0	0	0	0	0	0.229216	0	0.008475	0.0594227	0	0	0.171874	0.249393
AAEL001740	5.46991	6.08132	5.59992	6.0787	5.80746	7.17637	6.91057	6.6672	7.26617	7.00508	7.18184	6.27672	6.69873	7.33434	6.87291	7.74467	7.54674	6.63926	7.18329	7.27849	7.13356	7.33566	8.85649	7.99848	7.83105	6.97036	7.68417	8.37504	7.32449	7.58851	7.4153	7.08495	6.30528	6.12023	6.73144	7.3388	7.02952	7.60853	6.26927	7.06153	9.93996	7.19635	11.3688	12.0401	10.1363	16.8469	14.6489	16.5598	17.696
AAEL001732	0	0	0	0	0	0.000936	0	0.000471	0.026781	0.007047	0	0.004257	0	0.004455	0.002178	0	0	0	0	0	0	0	0.005326	0	0.0013315	0	0	0	0.001927	0.00048175	0	0	0	0.009163	0.00229075	0	0	0	0	0	0	0	0	0	0	0	0	0.008707	0
AAEL001742	16.0998	14.957	12.5681	13.0266	14.1629	18.1351	12.7418	13.7838	13.3405	14.5003	15.8156	13.6688	15.5134	15.7053	15.1758	16.297	13.5518	9.1874	11.6895	12.6814	17.9398	13.7162	13.8648	14.6333	15.0385	15.0675	17.0509	15.2932	14.0268	15.3596	24.1762	19.4755	18.9549	18.6247	20.3078	27.7725	17.6915	21.331	20.5402	21.8338	43.2787	34.5882	38.2004	36.337	38.101	38.0465	31.3099	30.5025	29.4879
AAEL011192	21.4627	27.623	19.3762	18.4823	21.736	23.6311	25.3111	26.5676	21.4685	24.2446	18.3811	21.5555	21.5302	22.3436	20.9526	19.68	25.0843	23.4682	23.9006	23.0333	25.3777	26.245	23.9728	24.0035	24.8998	24.7878	26.6878	31.2404	25.3341	27.0125	22.7424	26.2161	23.9042	27.3746	25.0593	27.8338	30.1195	25.93	23.0743	26.7394	35.1949	34.8666	43.0583	38.4846	37.9011	53.7409	49.5907	55.8917	52.3593
AAEL001734	0.390846	0.246634	0.408882	0.322447	0.342202	0.197329	0.174842	0.205254	0.226927	0.201088	0.307719	0.140151	0.250668	0.109887	0.202106	0.086049	0.109659	0.068936	0.138169	0.100703	0.330598	0.334263	0.314245	0.345581	0.331172	0.381384	0.240179	0.231588	0.307609	0.29019	0.268663	0.141492	0.244429	0.262155	0.229185	0.241465	0.091265	0.254645	0.316555	0.225983	0.916172	0.45447	0.859911	1.10122	0.832943	1.21616	0.821128	0.533914	0.630776
AAEL017687	0	0	0	0	0	0	0	0	0	0	0	0	0	0	0	0	0	0	0	0	0	0	0	0	0	0	0	0	0	0	0	0	0	0	0	0	0	0	0	0	0	0	0	0	0	0	0	0	0.273692
AAEL001748	2.12024	2.93535	2.44591	2.43948	2.48524	2.78081	3.1677	2.43242	2.88655	2.81687	1.42042	1.61168	1.92794	1.62283	1.64571	0.81545	1.49804	1.25832	1.33801	1.22746	1.36728	1.95925	1.41008	1.20253	1.48478	1.64059	2.89033	1.56304	1.63491	1.93222	1.66214	1.64268	1.43583	1.74103	1.62042	2.25397	2.5354	1.86994	1.82017	2.11987	3.31058	2.40388	3.11753	4.83159	3.4159	6.33796	6.76848	8.02064	7.48941
AAEL001744	0	0	0.073689	0	0.0184223	0.072458	0.024143	0	0.053142	0.0374357	0.11016	0	0	0.04213	0.0380725	0.019623	0	0	0	0.00490575	0	0.041383	0.108513	0	0.037474	0.042078	0.016411	0.043019	0.058965	0.0401183	0.052607	0	0	0.044885	0.024373	0.021521	0.026582	0.108115	0.067397	0.0559038	0.084987	0.102265	0.159545	0.185818	0.133154	0.027463	0.02515	0.128482	0.198047
AAEL025915	43.2703	42.8091	39.8809	48.2394	43.5499	48.872	49.7175	44.7452	48.8683	48.0508	3.36516	3.74024	2.26437	3.18881	3.13965	5.39511	8.24187	3.28266	6.27585	5.79887	10.1639	12.766	10.7583	11.5749	11.3158	10.4123	13.1386	8.52282	9.65055	10.4311	18.5086	16.4985	16.4889	15.9746	16.8676	23.8704	21.9099	24.8649	26.6295	24.3187	63.1569	44.6811	74.89	80.5091	65.8092	145.794	98.8321	132.81	111.354
AAEL026379	0	0.038891	0	0.06782	0.0266778	0.130574	0	0.15856	0.08297	0.093026	0.109045	0	0.186122	0.074211	0.0923445	0.078011	0	0	0	0.0195027	0	0	0	0.12909	0.0322725	0	0	0	0	0	0	0.137329	0	0	0.0343323	0	0	0	0	0	0	0	0.083897	0	0.0209742	0.043736	0.1313	0.345184	0.298642
AAEL017098	0.034265	0.124124	0.033841	0	0.0480575	0.024701	0	0	0	0.00617525	0	0	0.120465	0	0.0301163	0.056469	0	0	0	0.0141172	0	0	0	0	0	0.017913	0.013892	0.034552	0.096465	0.0407055	0.088611	0.127735	0	0.080844	0.0742975	0.050986	0.17799	0.042952	0.236974	0.127225	2.84877	0.758818	0.018854	5.9187	2.38629	1.2038	1.08342	0.197307	0.093394
AAEL022798	0	0	0	0	0	0	0	0	0	0	0	0	0	0	0	0	0	0	0	0	0	0	0	0	0	0	0	0.032076	0	0.008019	0	0	0	0	0	0	0	0	0	0	0	0	0	0	0	0	0	0	0
AAEL001738	1.09614	1.71309	1.44724	0.985732	1.31055	1.20634	1.40908	1.35851	1.22653	1.30012	1.83093	2.56665	1.8299	2.13016	2.08941	2.66804	2.86394	1.74293	2.15504	2.35749	2.00065	2.04107	2.37026	2.15476	2.14169	2.00611	1.65399	1.88706	1.7288	1.81899	2.23568	2.04787	2.4472	3.00084	2.4329	3.11901	2.53277	2.78576	3.75394	3.04787	4.19764	3.369	3.37298	4.00433	3.73599	2.31558	2.97502	2.89995	2.30317
AAEL001747	0	0	0	0	0	0	0	0	0	0	0	0	0	0	0	0	0	0.060917	0.069383	0.032575	0	0	0.164825	0	0.0412062	0	0	0.040731	0	0.0101828	0	0	0	0	0	0	0	0	0	0	0	0	0	0.051898	0.0129745	0	0	0	0.043973
AAEL007956	0.150746	0.057544	0.141253	0	0.0873857	0	0	0	0	0	0	0.08342	0	0	0.020855	0.105645	0	0	0	0.0264113	0.205359	0	0	0	0.0513398	0.077231	0	0	0	0.0193077	0	0	0.24322	0	0.060805	0.394993	0.097144	0.120375	0.407391	0.254976	0.069585	0.469249	0	0.240783	0.194904	0	0.132942	0	0
AAEL028043	541.383	516.964	501.356	552.537	528.06	549.992	551.908	538.035	566.947	551.721	564.238	1485.84	502.288	1234.91	946.819	457.552	466.055	631.849	485.032	510.122	511.784	518.936	517.773	387.659	484.038	388.598	568.627	458.493	431.564	461.821	1153.67	480.241	468.213	422.367	631.124	440.734	483.96	1183.86	409.384	629.485	457.215	465.951	608.342	442.516	493.506	876.121	602.877	662.043	724.61
AAEL022661	21.8543	18.3521	17.746	17.9331	18.9714	21.4716	17.5546	23.9792	18.6051	20.4026	17.8368	16.7022	17.2912	20.0124	17.9607	24.2094	20.9448	14.0361	17.7988	19.2473	20.9422	18.0143	20.912	16.6334	19.1255	13.9098	16.0769	11.9565	12.273	13.5541	19.7635	15.7272	15.8974	16.2414	16.9074	13.8959	15.0608	16.7209	13.3859	14.7659	19.5737	18.6339	21.0353	20.5345	19.9444	35.9506	23.039	28.9242	27.9566
AAEL008359	0.630055	1.93102	0.151787	0.178011	0.722718	1.98028	1.60059	0.486661	0.489914	1.13936	0.754277	0.611892	0.277048	0.193962	0.459295	0.431918	1.52404	0.497077	0.35125	0.701071	2.22138	9.76478	1.06064	1.77448	3.70532	6.58797	5.63439	8.4847	8.13423	7.21032	22.1217	22.8152	26.8618	23.9937	23.9481	22.3983	31.0708	11.3425	18.4795	20.8228	20.8724	73.7858	25.9458	12.2053	33.2023	20.3551	51.2279	12.9153	28.3592
AAEL008356	15.7559	18.9659	13.5109	15.1604	15.8483	17.5528	15.9424	23.9017	17.0044	18.6003	8.20007	8.34879	5.32444	8.70273	7.64401	15.8507	11.7295	8.93052	11.1778	11.9221	10.6403	15.6748	12.3157	13.5802	13.0528	13.7064	17.9401	17.2549	18.3521	16.8134	12.6602	16.4195	13.1124	11.6167	13.4522	11.2006	15.7031	13.7447	13.6192	13.5669	17.1103	15.1692	15.7524	21.4911	17.3808	32.4433	35.7539	26.5736	30.7572
AAEL022431	0.140085	0.147084	0.044626	0.078652	0.102612	0.201791	0.042175	0.051461	0.078892	0.0935797	0.119347	0.142351	0.040487	0.072107	0.093573	0.179425	0.049734	0.062149	0.020589	0.0779742	0.159184	0.109318	0.048868	0.069875	0.0968113	0.048187	0.023109	0.027412	0.011853	0.0276402	0.076208	0.106161	0	0.136611	0.079745	0.048713	0.13065	0.029802	0.097555	0.07668	0.357884	0.317241	0.153726	0.184361	0.253303	0.360976	0.350326	0.135359	0.233991
AAEL008360	0	0	0	0	0	0	0	0	0	0	0	0	0	0	0	0	0	0	0	0	0	0	0	0.063608	0.015902	0	0	0.031557	0.056365	0.0219805	0	0	0	0	0	0	0	0	0	0	0	0	0	0	0	0	0	0	0
AAEL003104	3.09125	3.68569	3.73589	3.70566	3.55462	2.46679	3.15607	2.80824	2.58926	2.75509	2.62587	2.05948	2.65177	2.03632	2.34336	1.68713	1.49756	1.58893	1.16947	1.48577	1.11573	1.55942	1.43219	1.03162	1.28474	1.10998	1.37826	1.24214	1.43694	1.29183	1.92677	2.27413	1.62099	2.76317	2.14626	3.0827	2.3209	2.5619	4.33033	3.07396	7.2744	5.08523	6.37946	9.65471	7.09845	11.6358	10.5661	9.10661	9.5276
AAEL003093	0	0	0	0.023325	0.00583125	0.035946	0	0	0	0.0089865	0	0	0	0	0	0	0	0	0.046885	0.0117213	0	0	0	0.038956	0.009739	0	0.031499	0.027523	0.026048	0.0212675	0	0	0	0.020537	0.00513425	0	0	0	0.04312	0.01078	0.142951	0	0.135267	0	0.0695545	0.035141	0	0	0
AAEL003097	3.75902	2.78803	3.35005	3.85898	3.43902	3.60303	3.04301	3.44097	3.59767	3.42117	1.3294	1.39791	1.80134	1.31032	1.45974	0.648223	0.712424	0.244802	0.584964	0.547603	0.955432	1.26025	0.841608	0.797128	0.963606	0.968933	1.454	0.730393	0.971578	1.03123	1.97675	1.4335	0.991751	1.37819	1.44505	1.37247	1.25797	1.40363	1.25622	1.32257	2.33317	2.5689	2.71379	2.26239	2.46956	4.89935	4.04709	4.18045	4.74128
AAEL003098	9.38716	9.71253	8.36646	9.95953	9.35642	7.31168	6.89787	6.58323	9.02505	7.45446	3.49523	4.062	3.35202	4.88086	3.94752	7.19873	12.6719	7.58328	9.73497	9.29722	16.0097	18.396	14.7674	24.8472	18.5051	30.6397	34.3042	42.3952	42.1271	37.3665	41.1863	32.0405	36.005	33.2478	35.6199	34.4847	33.9202	38.4191	36.9784	35.9506	25.7332	24.5568	20.1489	19.0492	22.372	7.96478	17.7469	15.4468	11.6423
AAEL029008	3.00476	4.35435	2.51297	3.54378	3.35396	1.02139	3.74168	4.85255	4.25397	3.46739	1.92136	7.7107	7.48102	5.24548	5.58964	0.919274	5.40231	2.76253	2.56234	2.91161	2.07838	2.99925	1.91325	2.4155	2.3516	1.98437	3.8124	2.68029	2.60935	2.7716	1.65325	2.62381	2.93117	2.06977	2.3195	1.50893	1.83172	1.2277	3.0101	1.89462	10.0112	7.4201	13.6743	13.6073	11.1782	7.14071	11.9	14.2161	12.1369
AAEL003106	16.813	19.0271	13.9468	14.3557	16.0357	16.1532	13.699	12.75	13.819	14.1053	16.0028	16.1647	16.4658	17.569	16.5506	16.5673	13.8827	10.9254	12.1453	13.3802	16.5943	18.3359	15.7667	17.0393	16.9341	16.0494	19.5812	15.0233	13.7631	16.1042	19.012	19.4291	18.0373	15.6449	18.0308	21.6774	20.03	18.1523	17.6595	19.3798	26.8727	27.1781	25.288	26.3465	26.4213	33.0349	35.7072	31.1306	32.4239
AAEL003108	23.0407	25.7924	19.9882	22.6868	22.877	22.1587	25.1995	22.1797	24.1497	23.4219	14.2005	14.1336	13.8751	12.8812	13.7726	17.4693	17.0376	9.56523	14.1019	14.5435	19.0605	21.3018	15.6946	19.2838	18.8352	16.6352	21.4034	13.7099	14.3377	16.5216	14.1845	15.646	13.4206	14.1366	14.3469	16.1333	14.3784	14.3624	14.7015	14.8939	25.197	21.4633	24.7982	27.4865	24.7363	37.8081	37.5799	33.7225	36.3594
AAEL026629	0.827988	0.536479	0.830072	0.405978	0.650129	1.0997	0.139967	0.247561	0.247517	0.433687	0	0.253507	0.09683	0.117495	0.116958	0.339174	0	0	0.378771	0.179486	0.130548	0	0.320806	0	0.112838	0.245067	0	0.756726	0.059378	0.265293	0.381042	0.483725	0.133838	0	0.249651	0.437062	0.359402	0.593795	0.429386	0.454911	0.434138	0.57494	1.12795	0.614708	0.687933	1.61894	0.852075	2.37703	1.18294
AAEL023076	1.10511	1.32153	1.13709	1.41087	1.24365	1.32626	0.950815	0.693582	0.943045	0.978425	1.24717	1.30732	1.25291	1.04801	1.21386	1.02767	1.34628	1.3537	1.15217	1.21995	1.59688	1.7903	1.62864	1.31895	1.58369	1.43139	2.4049	1.32329	1.04366	1.55081	1.27881	1.30582	1.2972	1.34139	1.30581	1.45273	1.3801	1.35142	1.56732	1.43789	1.492	1.81219	1.84326	2.38286	1.88258	1.91951	3.00025	2.08574	2.56998
AAEL019939	22.5524	32.1832	16.204	18.9842	22.481	26.4459	24.105	20.2794	20.6626	22.8732	9.6632	11.2742	10.0094	10.0388	10.2464	11.6071	9.96059	4.89844	7.80907	8.5688	12.1315	23.4894	11.0113	13.6682	15.0751	22.1505	31.3723	16.3696	22.4384	23.0827	43.4723	39.2021	32.369	38.0988	38.2855	47.8552	48.2903	43.7882	47.5215	46.8638	59.3685	80.8126	56.1318	62.0207	64.5834	73.4293	101.558	60.07	67.3324
AAEL021723	0.102052	0.313547	0	0	0.1039	0.147112	0	0	0.193802	0.0852285	0.172141	0	0	0	0.0430352	0.202956	0.144894	0	0.063233	0.102771	0.308686	0	0.148713	0.157092	0.153623	0	0.141511	0.036644	0	0.0445388	0	0	0	0.108475	0.0271188	0.29314	0.361251	0	0.174467	0.207214	0.348513	0.304732	0.296318	0.223087	0.293162	0.478418	0.37818	0.162638	0.25466
AAEL009351	72.9481	91.7668	70.822	81.5212	79.2645	74.9331	82.0224	73.9767	77.7469	77.1698	56.6772	71.3481	75.7424	62.1015	66.4673	51.1691	64.3257	78.8545	60.8042	63.7884	62.0077	71.7665	68.2815	54.6384	64.1735	55.9634	76.9874	62.3949	57.6276	63.2433	49.3873	60.198	53.9169	52.5085	54.0027	48.1324	65.0257	45.6215	58.9196	54.4248	68.8922	70.88	73.1701	93.8368	76.6948	106.899	108.078	112.826	124.25
AAEL009356	3.80154	3.65864	3.49104	2.24948	3.30017	3.23631	2.76288	2.80977	2.98811	2.94927	6.2507	5.97036	5.60097	5.93702	5.93976	5.83834	5.61543	6.6768	5.01005	5.78516	3.47216	4.28842	4.33383	2.7915	3.72148	1.65094	3.15977	2.31732	1.69457	2.20565	1.73043	2.15789	1.56181	1.48144	1.73289	2.05569	2.35585	2.2543	2.78343	2.36232	3.69121	3.75039	4.64675	4.08926	4.0444	9.07938	8.54426	8.77366	11.5348
AAEL014578	15.8667	16.019	14.7389	16.0961	15.6802	15.701	14.6431	15.8047	15.786	15.4837	15.5199	14.016	14.4888	15.7861	14.9527	16.0616	13.9183	10.9996	12.7769	13.4391	14.5667	15.4764	12.9328	15.6151	14.6478	13.668	13.726	13.0459	13.8707	13.5777	15.896	13.6296	11.5809	13.0632	13.5424	14.2531	12.982	13.1271	14.2447	13.6517	22.3656	15.8443	20.2745	22.2934	20.1945	30.2253	23.6682	26.1279	31.6763
AAEL014577	0.885748	1.07941	1.19634	0.847914	1.00236	1.19605	0.864291	1.02532	1.04595	1.0329	0.74203	0.973177	0.804532	0.96533	0.871267	0.789793	0.899231	0.649845	1.07394	0.853201	0.771003	1.52947	0.84129	0.584779	0.931636	0.874357	0.873348	1.29092	1.10854	1.03679	0.942783	0.795213	0.856779	0.660406	0.813795	1.28309	1.48903	1.53241	1.34708	1.4129	2.43518	2.39631	3.24273	2.41119	2.62135	3.81773	5.35827	5.0881	4.17025
AAEL014576	9.97609	9.42538	8.38087	8.23413	9.00412	8.53305	10.0348	11.1171	12.7947	10.6199	17.1591	17.4991	17.9422	19.4843	18.0212	24.4079	27.3951	30.2928	26.7028	27.1996	20.9578	23.2881	25.6798	16.332	21.5644	7.35932	10.8085	9.2951	4.29694	7.93998	2.13999	4.22227	3.02718	1.34457	2.68351	2.00644	3.75753	2.31939	1.96631	2.51242	5.82966	4.87314	5.91024	6.97785	5.89772	32.9483	21.2525	29.1535	41.3962
AAEL024528	9.11354	9.87057	7.8058	9.69525	9.12129	10.3061	9.33141	7.95583	9.20176	9.19877	5.04025	6.03086	5.7827	6.01753	5.71784	9.20822	9.40784	4.72336	8.11065	7.86252	11.5921	12.1513	11.0365	9.92897	11.1772	10.0193	11.8636	9.00825	8.58921	9.87008	11.7695	10.4266	8.54166	10.2157	10.2384	11.5226	10.3299	11.0821	12.4091	11.3359	21.8715	16.8174	20.1521	20.7751	19.904	25.1701	25.0502	22.3221	22.9699
AAEL023854	0	0	0.388366	0.278696	0.166766	0.053741	0	0	0	0.0134352	0	0	0.391982	0	0.0979955	0	0	0	0	0	0	0	0.126674	0	0.0316685	0	0	0	0.231695	0.0579237	0	1.03732	0.066659	0	0.275994	0	0.480722	0	0	0.12018	0.073813	0.138839	0.09171	0	0.0760905	0	0	0	0
AAEL018709	0.056433	0.623144	0.053595	0.033551	0.191681	0.213095	0.390206	0.184145	0.052428	0.209969	0.268264	0.466575	0.076474	0.308865	0.280044	0.288443	0.460612	0.248405	0.196588	0.298512	0.289971	0.472132	0.019666	0.225456	0.251806	0.29322	1.00097	0.497001	0.448023	0.559802	1.27684	1.94838	1.22859	1.3689	1.45568	1.02035	1.38924	1.27356	0.930774	1.15348	1.06522	1.2508	0.999826	0.609971	0.981455	0.975244	1.09754	0.94752	0.85145
AAEL024647	0.034996	0.078263	0.016698	0.064281	0.0485595	0.040406	0	0.058193	0.021067	0.0299165	0	0.184106	0	0	0.0460265	0.35601	0.053558	0	0	0.102392	0.03285	0.04886	0	0	0.0204275	0.188335	0	0	0.035216	0.0558877	0.036556	0.096744	0.116088	0	0.062347	0.108454	0.055502	0.020076	0	0.046008	0.106718	0.049057	0	0.061209	0.054246	0.236077	0.059124	0.107604	0.04805
AAEL017096	4530.5	4511.76	4444.37	4515.73	4500.59	4681.21	4440.55	4872.64	4601.74	4649.03	4054.83	4326.76	4531.88	4199.36	4278.21	4339.33	4402.58	4172.5	4102.91	4254.33	3903.4	4410.95	4657.23	3805.03	4194.15	2976.03	4139.78	3695.06	3216.5	3506.84	3000.85	3378.86	3063.35	2777.47	3055.13	2671.09	3344.32	2930.05	2631.92	2894.34	3066.14	3205.99	3347.46	3659.89	3319.87	5792.82	5910.83	5951.37	7009.44
AAEL001425	2.13105	3.9045	1.52429	2.14792	2.42694	2.7547	2.35399	1.52621	3.07853	2.42836	4.37691	3.15572	3.54971	5.45518	4.13438	4.58849	5.0762	6.25208	4.5569	5.11842	3.33066	3.82286	6.62483	3.61443	4.3482	3.13832	4.05011	4.90154	3.19411	3.82102	1.89727	2.46589	2.87117	2.27166	2.37649	2.15609	3.26886	2.87269	2.83469	2.78308	3.18917	4.72631	5.64905	4.44712	4.50291	9.72824	8.72441	7.95679	8.62052
AAEL001423	23.2709	35.1757	28.016	28.1051	28.6419	30.6082	30.4889	26.2637	23.1191	27.62	19.8987	25.1785	21.9391	22.2687	22.3213	19.7599	22.6047	23.0559	16.3769	20.4493	9.99556	25.2459	13.5594	8.77216	14.3933	10.9036	20.6854	9.83073	10.9842	13.101	8.1318	14.5661	8.42764	7.86595	9.74786	9.04498	14.6711	10.2067	9.7417	10.9161	13.5	17.029	17.2885	16.0697	15.9718	39.6146	41.2563	45.7584	61.2002
AAEL001426	3.39129	2.95824	2.90251	2.26074	2.87819	2.73033	2.94308	3.49786	2.24838	2.85491	2.47226	2.32513	2.20187	2.99341	2.49817	3.72035	2.89826	3.30235	3.19398	3.27874	3.49329	3.31063	2.92116	2.9533	3.1696	3.70238	2.87128	3.74019	2.28449	3.14958	1.91789	2.79901	2.4971	1.96623	2.29506	2.66363	2.04673	2.94766	2.47809	2.53403	5.24772	3.6436	5.61281	5.60585	5.02749	10.114	8.30705	8.95959	6.49137
AAEL001424	8.69004	10.6816	7.67583	7.92621	8.74342	8.33133	8.9087	8.58227	7.41941	8.31043	4.81427	3.22345	5.90383	4.13333	4.51872	4.27588	4.97423	4.36658	5.26475	4.72036	6.80391	8.55917	8.51167	8.85592	8.18267	9.29276	11.2101	11.1788	7.91639	9.89952	7.80405	10.6468	6.7014	6.87068	8.00572	7.41316	7.80089	7.48341	7.11812	7.45389	10.1019	10.5023	13.7389	12.7615	11.7762	21.4771	15.2114	21.359	18.2061
AAEL001412	8.02609	9.96308	12.3495	14.293	11.1579	15.3006	12.6257	11.4157	12.3647	12.9267	27.5842	27.4729	27.7119	32.307	28.769	34.0113	30.8242	36.9166	29.5101	32.8155	19.3756	20.9334	26.0765	13.4248	19.9526	7.59086	10.7313	7.2919	6.72157	8.0839	1.52726	4.92845	2.42868	2.84257	2.93174	2.23823	3.16743	3.42328	4.28856	3.27938	3.80886	6.7712	3.80056	5.93229	5.07823	24.3079	19.1962	26.3037	34.8122
AAEL001400	16.2281	14.5848	5.56567	6.30629	10.6712	4.2244	4.11762	3.53248	5.16397	4.25962	13.1365	9.39788	14.2529	12.5229	12.3275	13.617	11.721	12.6216	10.1982	12.0394	21.1516	9.45365	10.4865	11.5706	13.1656	3.55996	2.73788	4.2184	2.73419	3.31261	3.22421	2.49697	1.72102	3.74634	2.79713	3.31232	6.11664	0.165902	0.190828	2.44642	8.08051	0.344239	8.21471	10.0024	6.66048	13.402	8.4415	11.7553	17.9976
AAEL001432	144.884	150.144	130.766	142.974	142.192	153.987	141.99	145.796	142.169	145.985	431.939	392.982	378.833	460.068	415.956	538.38	510.031	500.983	491.401	510.199	486.947	432.256	503.226	496.473	479.725	200.652	224.757	207.96	208.128	210.374	109.497	157.265	115.277	97.0873	119.782	84.337	127.914	103.21	66.6502	95.5277	115.01	131.411	124.065	123.194	123.42	211.845	167.331	166.105	183.966
AAEL001397	8.64823	12.9311	6.55559	8.06958	9.05112	10.2302	8.65396	6.55587	8.31495	8.43875	6.9673	6.47523	6.26064	7.67282	6.844	7.00037	7.90312	5.39126	6.60912	6.72597	7.60034	10.9513	7.43396	6.86646	8.21302	7.1841	12.9097	6.94697	7.47518	8.62899	8.69008	12.2567	8.63568	7.97629	9.38969	11.4249	12.4882	9.24563	10.2458	10.8511	18.4918	20.2965	20.0757	21.4904	20.0886	24.2667	30.7743	19.4924	26.0718
AAEL001407	3.04498	3.55696	2.31422	3.53968	3.11396	2.76402	2.09147	2.27566	2.8523	2.49586	1.9363	2.82742	1.42833	1.94261	2.03366	2.3743	2.77841	2.74877	1.66384	2.39133	2.80485	2.68126	2.19742	1.87797	2.39038	3.43881	3.23977	1.78181	2.14928	2.65242	3.4225	2.85144	2.47658	2.37428	2.7812	3.15261	2.58797	3.3617	2.16915	2.81786	4.19998	3.56413	4.37239	4.58321	4.17993	5.65916	5.5366	4.35302	5.5344
AAEL022507	0.773186	0.759308	0.161862	0.185525	0.46997	0.388662	0.88634	0.150259	0.148792	0.393513	0	0.047331	0	0.278449	0.081445	0.525512	0.48577	0.349778	0.152626	0.378422	0	0.086189	0.423307	0.318515	0.207003	0.597524	0.259309	0	0	0.214208	0.346378	0.1372	0.1687	0.275883	0.23204	0.134915	0.112695	0.346657	0.044275	0.159635	0.236886	1.32517	0.420257	0	0.495578	0.685259	0.982216	1.22512	0.18505
AAEL001405	9.45057	12.6136	9.67022	10.7284	10.6157	11.469	8.22614	11.3649	10.7664	10.4566	16.6879	14.5348	15.7601	16.5723	15.8888	17.3796	16.1181	17.2379	17.7436	17.1198	14.2249	12.5503	14.5679	13.8128	13.789	11.0068	10.703	10.3529	9.01514	10.2695	9.9877	11.6046	9.58583	9.70733	10.2214	9.89155	10.1769	10.5568	9.80328	10.1071	14.9876	15.5524	15.5077	14.5196	15.1418	23.3342	19.5393	20.7304	19.5305
AAEL001411	63.0354	66.007	50.5051	53.1417	58.1723	74.4114	55.6639	52.7943	53.4312	59.0752	101.883	106.882	98.4099	107.751	103.732	100.553	87.5756	47.832	69.834	76.4487	106.457	102.328	89.0696	94.5241	98.0946	101.606	124.837	83.8267	90.3605	100.158	81.03	95.985	66.2964	73.1587	79.1175	57.5368	71.4148	56.7377	50.1058	58.9488	68.2594	84.722	62.8439	76.5804	73.1014	119.542	120.12	110.402	130.221
AAEL001395	3.77035	3.91196	3.15824	4.14923	3.74745	4.35384	3.29332	3.03297	3.64346	3.5809	6.02309	7.05261	4.97181	5.07046	5.77949	5.98393	6.35858	4.707	4.63662	5.42153	4.78831	4.72398	4.87386	4.80233	4.79712	3.79772	4.22931	3.41	2.76289	3.54998	2.90313	3.70773	2.07367	3.04824	2.93319	3.37207	2.76869	3.46956	2.42235	3.00817	4.46239	3.4068	4.90781	5.60515	4.59554	9.63533	11.4349	9.99287	11.6431
AAEL001434	23.9332	23.0205	21.8146	23.6173	23.0964	23.2685	19.2331	23.5287	20.9206	21.7377	5.06553	4.56269	5.15334	4.36048	4.78551	5.64055	4.45557	2.83474	3.78698	4.17946	5.50957	5.3195	4.75229	5.61725	5.29965	9.15412	6.31183	7.01563	8.24819	7.68244	17.9564	12.0484	15.0834	14.4494	14.8844	20.7405	12.5203	17.7894	17.9131	17.2408	29.6842	18.8116	27.7602	26.2129	25.6173	40.0796	25.2831	40.3314	32.7333
AAEL027032	0	0.062035	0.071823	0	0.0334645	0	0	0.066208	0	0.016552	0	0.084834	0	0	0.0212085	0	0	0	0.260872	0.065218	0.083536	0	0	0	0.020884	0	0	0	0	0	0	0.123896	0.091506	0.111838	0.08181	0.321081	0.132309	0.190423	0.179262	0.205769	0	0.095441	0	0	0.0238602	0.086459	0	0.357085	0
AAEL016131	0	0	0	0	0	0	0	0	0	0	0	0	0	0	0	0	0	0	0	0	0	0	0	0	0	0	0	0	0	0	0	0	0	0	0	0	0.150342	0	0	0.0375855	0	0	0	0	0	0	0	0	0
AAEL001403	2.02403	1.65351	1.44281	1.1079	1.55706	1.52065	1.4319	1.36784	1.04214	1.34063	0.818924	0.23071	1.36827	1.25955	0.919362	0.967541	0.956276	0.529488	1.1117	0.89125	0.390676	0.715381	0.669656	0.435345	0.552764	2.2918	1.5634	2.0337	1.55278	1.86042	2.43973	3.2803	2.58871	1.10822	2.35424	1.54102	2.91259	0.848001	1.17884	1.62011	1.83078	2.5008	2.90073	3.32117	2.63837	6.28073	4.46125	3.30466	2.55917
AAEL028185	4.66198	4.50495	3.85365	4.17022	4.2977	5.09202	4.65966	4.41423	5.13827	4.82605	1.95942	2.25804	1.85572	2.42136	2.12363	3.36659	3.34259	1.46321	2.69655	2.71724	3.20167	3.5163	3.14794	3.90134	3.44181	4.19293	4.95364	3.3121	3.86594	4.08115	6.80241	6.01025	5.62693	5.73371	6.04332	8.01427	5.97999	7.38769	7.6672	7.26229	11.1835	10.295	9.53887	11.5193	10.6342	11.2712	12.1121	9.6453	9.40562
AAEL017059	13.9469	13.103	11.3149	12.7465	12.7778	16.5141	17.7487	17.282	15.5815	16.7815	18.2571	16.1611	13.7558	19.8354	17.0023	30.3703	31.6829	31.224	35.3158	32.1482	35.9954	33.5579	40.3604	32.048	35.4904	19.0398	17.5488	19.2057	13.6504	17.3612	7.38204	11.191	7.44904	6.49293	8.12874	7.75712	8.96035	7.10276	8.4049	8.05628	15.4343	12.4049	17.1006	15.6166	15.1391	44.2584	31.961	40.2084	45.6746
AAEL001421	142.861	141.789	128.671	143.525	139.211	143.345	139.266	124.052	139.396	136.515	132.765	169.526	130.394	172.461	151.287	175.327	210.826	124.409	184.414	173.744	182.108	203.749	196.841	178.868	190.392	76.0118	136.07	89.6354	83.5803	96.3244	71.1262	91.1407	66.9047	63.4153	73.1467	62.1849	80.5003	61.2999	56.8413	65.2066	77.1209	93.1146	81.9626	80.8052	83.2508	132.6	159.744	120.364	164.617
AAEL017300	0.176557	0.143738	0.126312	0.100038	0.136661	0.067734	0.020088	0.04512	0.013827	0.0366923	0.012707	0.055752	0.064084	0.064512	0.0492637	0.087098	0.042368	0.14335	0.035657	0.0771182	0.031128	0.023057	0.03613	0.058576	0.0372227	0.109914	0.07272	0.041905	0	0.0561347	0.086222	0.188827	0.070345	0.214191	0.139896	0.065766	0.106972	0.070131	0.077698	0.0801417	0.324064	0.162101	0.316721	0.211029	0.253479	0.377886	0.089772	0.404486	0.40381
AAEL001435	0.078671	0	0.041372	0	0.0300107	0	0	0	0	0	0	0	0.035077	0	0.00876925	0	0	0	0	0	0	0	0	0.016695	0.00417375	0	0	0	0	0	0	0.018201	0	0	0.00455025	0	0	0	0	0	0.051908	0	0.102641	0	0.0386372	0	0	0	0
AAEL001437	0.037444	0.093448	0	0.034233	0.0412812	0.01647	0	0	0.047061	0.0158828	0	0.056934	0.029335	0.03956	0.0314572	0.03685	0.02538	0	0	0.0155575	0.01415	0.025616	0	0.052483	0.0230622	0	0.043723	0.026629	0.025542	0.0239735	0.015897	0	0	0.010069	0.0064915	0.033867	0.03958	0	0	0.0183617	0	0.030903	0	0.051584	0.0206218	0.089595	0.068741	0.112266	0.086927
AAEL001410	2.19577	2.47875	2.34718	2.27475	2.32411	2.62691	2.11293	1.99557	2.04265	2.19451	1.80667	1.89797	2.08229	2.02588	1.9532	1.587	1.59197	1.03617	1.71388	1.48225	1.54153	1.71834	1.86724	1.59724	1.68109	2.13855	2.15414	1.82286	1.44896	1.89113	3.10983	2.4974	2.56657	2.78579	2.7399	2.73627	2.65588	2.9497	3.29186	2.90843	4.73252	4.48757	5.37333	4.88958	4.87075	7.13023	6.31784	6.86433	6.99519
AAEL001422	12.3708	14.5715	12.2542	12.3162	12.8782	13.7641	14.2342	11.2794	12.9138	13.0478	10.1103	12.7293	11.741	11.4485	11.5073	14.5361	13.4367	15.3771	15.8705	14.8051	16.945	16.5637	14.6937	19.7104	16.9782	14.939	15.4953	16.0554	15.8168	15.5766	21.4981	21.3471	25.3987	27.3991	23.9108	29.5064	25.5355	26.6668	26.7979	27.1266	42.8793	41.6963	44.0787	43.111	42.9413	52.6105	47.332	45.1944	38.3444
AAEL026908	0.293476	0	0	0	0.073369	0.116581	0	0	0	0.0291452	0	0	0	0	0	0	0	0	0	0	0	0	0	0	0	0	0	0	0	0	0	0	0	0.346597	0.0866492	0.301879	0	0	0	0.0754698	0.459463	0	0	0	0.114866	0	0	0	0
AAEL015651	9.00505	11.5073	9.03282	10.3115	9.96416	11.8691	10.5718	7.37023	7.86348	9.41866	49.4366	35.3245	36.1317	51.0224	42.9788	28.0805	33.8858	42.2391	27.9475	33.0382	18.2125	16.7744	16.2659	20.4215	17.9186	16.8265	13.6166	18.9142	21.304	17.6653	19.0667	20.5405	17.6984	17.4561	18.6904	19.0334	19.4295	20.0371	21.4599	19.99	24.1989	22.2171	25.6841	28.5277	25.1569	34.1756	22.0478	24.4225	21.643
AAEL001438	1.59328	1.23482	1.3388	1.15677	1.33092	1.65848	0.829669	0.82092	1.04573	1.0887	0.924936	0.902762	1.06227	1.05673	0.986673	0.831144	0.654267	0.613987	0.929775	0.757293	0.83912	0.617125	0.973036	0.871754	0.825259	1.01798	1.08138	1.18732	1.01668	1.07584	1.46397	0.900149	1.09508	1.15584	1.15376	1.35759	0.747183	0.992358	1.10506	1.05055	1.79631	1.40185	2.09615	1.50276	1.69927	3.1705	2.03646	2.3068	2.82486
AAEL001394	5.46584	3.95084	2.75235	2.73603	3.72626	4.31803	3.11485	3.01798	3.23271	3.42089	1.97874	1.94589	1.53545	1.51974	1.74496	2.03464	1.60654	1.31615	2.05039	1.75193	2.40331	1.83645	1.41619	1.70793	1.84097	3.01227	2.84636	2.57156	2.72664	2.78921	3.42926	3.03656	3.42158	2.05685	2.98606	4.04795	2.92282	3.06387	2.68572	3.18009	7.67451	4.83841	7.82206	5.72562	6.51515	9.81729	6.82781	7.92912	6.66228
AAEL001396	1.88053	1.62152	1.94503	2.46202	1.97727	2.17186	1.82356	1.70263	2.12495	1.95575	1.04323	1.58682	1.01046	0.820271	1.11519	1.09971	0.526745	0.624851	1.13166	0.845742	1.51297	1.84392	1.56238	2.5439	1.86579	15.1198	6.62473	9.84011	11.7491	10.8334	19.8329	10.9416	19.554	17.2109	16.8849	14.1795	11.0077	16.9017	16.6887	14.6944	7.81979	12.437	8.32319	8.71708	9.32426	4.12315	6.9618	5.989	4.62676
AAEL001416	7.465	8.31898	6.47649	6.57071	7.20779	8.92577	6.71607	8.14009	7.72474	7.87667	10.6738	9.83389	11.2197	11.0802	10.7019	8.95106	8.9462	7.12094	7.44975	8.11698	7.45335	8.30865	8.05131	7.29155	7.77622	5.70172	8.59469	7.11487	5.49374	6.72625	6.84541	7.93744	6.51706	6.12729	6.8568	7.86778	8.28749	7.46922	5.67006	7.32364	13.0513	9.82474	13.0602	14.7054	12.6604	23.2466	19.5128	22.9864	19.8267
AAEL021546	0.405137	0.455187	0.233735	0.700262	0.44858	0.236068	0.527892	0.331345	0.24363	0.334734	0.186191	0	0.186145	0.167635	0.134993	0.313451	0.227778	0	0	0.135307	0.240628	0.172918	0	0	0.103387	0.392231	0.136932	0.712977	0.565056	0.451799	1.00306	0.945801	1.23001	1.20597	1.09621	1.05055	0.71691	1.93362	0.851462	1.13813	1.31196	0.850235	1.88451	1.21384	1.31514	0.818399	0.927041	0.992129	0.547261
AAEL001399	0.080961	0.446349	0.046963	0	0.143568	0.193515	0.197122	0.123162	0.043412	0.139303	0.235561	0.154807	0.069884	0.133797	0.148512	0.317308	0.447366	0.248038	0.421474	0.358546	0.551961	0.94918	0.526868	0.386548	0.603639	0.714879	0.92986	0.4388	0.667466	0.687751	0.654354	0.764083	0.845917	0.702088	0.74161	0.689198	1.12419	0.830853	0.794133	0.859594	0.588341	1.06649	0.486375	0.575098	0.679077	0.624299	1.46578	0.332013	0.738417
AAEL023787	0	0.025264	0.021829	0	0.0117732	0.016376	0	0	0.083686	0.0250155	0	0	0	0	0	0	0	0	0	0	0	0	0	0	0	0	0	0	0	0	0	0.046818	0	0	0.0117045	0.114489	0	0	0.038106	0.0381488	0.032261	0.087118	0.099874	0	0.0548133	0.152679	0.139153	0.076985	0.16989
AAEL021977	7.92441	8.08061	6.95044	7.71634	7.66795	8.07279	8.09507	7.36534	8.25698	7.94755	13.1663	16.2405	14.5977	15.7273	14.933	10.9786	12.657	9.14495	9.12101	10.4754	10.9438	12.0247	10.7562	11.8705	11.3988	6.17251	8.8624	6.48019	5.73158	6.81167	7.35141	7.94877	5.94494	6.33837	6.89587	7.6661	7.47885	6.5924	6.77309	7.12761	10.4242	10.974	10.8317	11.5804	10.9526	18.3194	18.105	15.6575	17.7305
AAEL026079	0	0	0.09837	0.011258	0.027407	0.097985	0.009055	0	0.021858	0.0322245	0	0	0.006204	0.02174	0.006986	0.007359	0.026858	0.087944	0	0.0305403	0	0	0	0	0	0.031458	0	0.008014	0	0.009868	0.03933	0.015559	0	0	0.0137223	0	0.055316	0	0	0.013829	0.063394	0.038099	0	0	0.0253732	0.0206	0.028297	0.017673	0
AAEL001428	0.161103	0.030611	0.072381	0.100916	0.0912527	0.186749	0.118406	0	0.139816	0.111243	0.044381	0.088441	0	0	0.0332055	0	0	0	0	0	0	0	0	0	0	0.104197	0	0	0	0.0260492	0.033166	0	0.062539	0.093379	0.047271	0.184022	0	0.199406	0.079873	0.115825	0.15816	0	0.124817	0	0.0707442	0.10688	0.074394	0.218073	0.137632
AAEL019542	4.6147	4.78342	3.94139	4.74558	4.52127	5.20571	4.80598	4.45072	4.57783	4.76006	2.3248	3.02725	3.1156	2.0831	2.63769	2.20088	2.8008	1.58594	2.07079	2.1646	2.06724	3.66518	1.98848	1.65866	2.34489	2.68969	4.74154	2.34804	3.29188	3.26779	4.75317	5.03164	3.1671	3.96539	4.22933	4.57455	5.12247	4.94882	5.53034	5.04405	6.90008	9.08104	6.97083	8.15265	7.77615	9.6582	12.6361	10.2001	11.4638
AAEL001414	4.74848	2.61094	1.95861	3.71802	3.25901	0.439752	0.380731	1.02179	1.87128	0.928387	0.349805	0.339922	0.140855	1.74493	0.643877	1.18312	0.211558	0.390856	1.89708	0.920655	0.291064	1.7637	2.00209	3.92188	1.99468	3.54014	1.89658	7.39657	8.41853	5.31296	3.64744	3.18733	2.12874	7.08136	4.01122	2.52867	1.47548	0.291488	0.597225	1.22321	10.6232	4.16494	4.14412	10.5671	7.37484	0.234855	0.158125	0.361871	1.17428
AAEL001420	7.75157	4.67734	1.41168	3.83996	4.42014	0.82855	0.732482	0.799626	3.9989	1.58989	0.275814	0.475711	0.326739	3.82579	1.22601	1.31735	0.323437	0.244647	2.87201	1.18936	0.471913	4.00491	2.99167	5.06013	3.13215	5.7137	3.36116	11.1324	8.98039	7.2969	3.60528	3.75365	1.62883	5.43915	3.60673	1.16788	1.24298	0.217414	0.696364	0.83116	8.11905	3.13916	2.01618	3.80221	4.26915	0.282977	0	0.074979	0.58001
AAEL001417	0.080213	0.015799	0.045352	0.085364	0.056682	0.04914	0	0	0.17416	0.055825	0	0	0	0.084624	0.021156	0.042554	0	0	0	0.0106385	0	0	0	0	0	0	0.038555	0.050702	0	0.0223143	0	0.033249	0	0.03086	0.0160272	0	0.041773	0	0	0.0104432	0.064344	0.258536	0.165998	0	0.122219	0	0	0.055536	0.164765
AAEL001401	2.19454	1.0347	0.17887	0.965822	1.09348	0.268858	0.224456	0.397664	0.73458	0.406389	0.185423	0.158059	0.055737	0.206258	0.151369	0.363188	0.15222	0.049722	0.670668	0.308949	0.28292	0.609715	0.444132	1.20307	0.63496	1.13587	1.50109	3.34766	2.86407	2.21217	1.12006	1.67921	0.904533	3.22407	1.73197	1.60912	0.777334	0.216991	0.350531	0.738493	4.0487	1.95978	3.76078	5.11607	3.72133	0.760015	0.16676	0.401295	0.82792
AAEL001402	1.64509	1.04482	0.530734	1.49651	1.17929	0.276965	0.234109	0.561244	0.810864	0.470795	0.497045	0.15658	0.274512	1.58166	0.627449	0.190593	0	0.052339	0.483014	0.181486	0	0.920038	1.08477	1.42588	0.857673	1.51588	1.17973	2.36761	2.27212	1.83383	0.926516	0.700467	0.752829	1.85577	1.05889	1.2812	1.18551	0.329697	0.189013	0.746355	4.23356	2.53608	4.23083	7.66298	4.66586	0.134043	0.212567	0.143744	0.441812
AAEL016108	0	0	0	0	0	0	0	0	0	0	0	0	0	0.154653	0.0386632	0	0	0	0	0	0	0	0	0	0	0	0	0	0	0	0	0	0	0	0	0	0	0	0	0	0	0	0	0	0	0	0	0	0
AAEL027950	0	0	0.126025	0.038502	0.0411318	0.062158	0.078544	0.05336	0.057878	0.062985	0.037348	0.014885	0	0.004921	0.0142885	0	0	0.14048	0	0.03512	0	0	0	0	0	0	0	0	0.165783	0.0414457	0.016942	0.053261	0.055879	0	0.0315205	0	0.00948	0	0	0.00237	0.124167	0.028242	0.153759	0	0.076542	0.044972	0.072758	0.095681	0.270408
AAEL023677	0.152018	0.053546	0.062203	0.019645	0.071853	0.253833	0	0.029156	0.060781	0.0859425	0.23731	0.073471	0	0.068104	0.0947212	0.217811	0	0	0.029615	0.0618565	0	0.325113	0.140471	0.09777	0.140839	0	0.195249	0.034771	0.065812	0.073958	0.085041	0.172754	0.091936	0.060744	0.102619	0.092924	0.00466	0.317349	0.01262	0.106888	0.211846	0	0.022936	0.258437	0.123305	0.210355	0.299695	0.137362	0.035404
AAEL009214	344.515	469.01	301.567	313.786	357.22	452.611	371.198	309.84	296.327	357.494	351.476	349.923	289.82	315.252	326.618	497.178	567.021	444.469	567.274	518.985	827.984	908.542	845.396	982.46	891.095	1477.34	1633.07	1691.86	1687.37	1622.41	1642	2091.47	1653.92	1908.97	1824.09	1202.06	1604.64	1480.13	1204.63	1372.87	703.167	1084.16	640.568	691.582	779.869	287.302	535.532	564.472	477.106
AAEL009213	3.91636	5.22158	3.69755	3.90583	4.18533	4.72382	3.91939	2.96711	3.84687	3.8643	2.25444	2.4144	2.15833	2.40122	2.3071	2.39973	2.64577	1.47611	2.52694	2.26214	3.26109	4.28401	3.2624	3.29172	3.5248	3.52963	5.24702	2.86151	3.62609	3.81606	2.26123	4.37481	3.28707	3.18481	3.27698	2.96848	4.13416	3.31552	3.3211	3.43481	5.33945	5.25235	4.88598	6.26981	5.4369	6.91915	8.80824	7.28826	9.04966
AAEL024235	27.81	27.2693	24.1819	29.2379	27.1248	28.8471	25.3304	23.7637	25.2624	25.8009	13.2889	14.0313	15.4729	13.4299	14.0557	15.4135	11.6871	6.24461	10.6676	11.0032	15.6502	16.9181	12.1934	13.57	14.5829	13.9301	20.6823	11.6423	13.8432	15.0245	28.2732	23.1266	18.586	23.071	23.2642	26.6291	22.9437	24.6182	26.6546	25.2114	39.7988	43.6255	38.9514	42.7422	41.2795	59.615	60.7949	47.6436	53.6065
AAEL018733	0	0	0	0	0	0	0	0	0	0	0	0	0	0	0	0.211755	0	0	0	0.0529387	0	0	0	0.328142	0.0820355	0	0	0	0	0	0	0	0	0	0	0	0.236196	0	0	0.059049	0.890692	0	0	0	0.222673	0	0.509691	0.787688	0
AAEL020128	2.76016	2.42334	3.49399	3.17745	2.96373	3.17042	2.21518	3.3726	3.79317	3.13784	0.350644	0.382505	0.519155	0.360847	0.403288	0.969648	1.02657	0.317715	0.852448	0.791594	2.74205	1.36923	2.322	2.20082	2.15852	1.69804	1.73306	1.81716	1.48774	1.684	2.01774	1.3738	1.86335	1.02205	1.56923	1.33326	0.668236	0.688049	0.840351	0.882473	0.573585	0.579788	0.355606	0.465393	0.493593	0.524013	0.470691	0.73333	0.769246
AAEL006224	34.2521	44.7282	36.0087	38.2516	38.3102	37.8868	39.3906	32.5989	34.265	36.0353	24.3904	27.8601	27.8363	24.5795	26.1666	24.5456	40.043	33.7191	36.6777	33.7463	39.7366	46.0807	58.074	59.9513	50.9606	80.1472	89.9173	87.9569	93.2238	87.8113	77.7695	76.3039	70.4729	88.168	78.1786	86.1294	76.0064	90.0376	111.9	91.0183	130.772	108.714	143.56	145.983	132.257	84.1269	112.431	128.032	100.215
AAEL006221	9.90244	12.0139	10.0706	11.5119	10.8747	10.9993	10.416	10.1232	11.1443	10.6707	9.54334	8.2145	8.47724	11.2132	9.36206	12.5493	11.8859	11.2226	10.8402	11.6245	10.915	12.423	13.6134	11.3848	12.0841	8.21927	13.2684	8.77305	8.42057	9.67033	5.58782	10.8159	7.42958	7.09976	7.73326	7.48153	9.95627	8.16707	8.89361	8.62462	14.4687	13.2608	16.9871	14.6327	14.8373	28.6503	30.1453	26.9111	30.5984
AAEL006211	0.509942	0.576936	0.176123	0.177883	0.360221	0.542955	0.424042	0.405049	0.363659	0.433926	0.471853	0.272856	0.237468	0.394477	0.344164	0.451553	0.432693	0.298206	0.509633	0.423021	0.719707	0.787811	0.585659	0.426541	0.629929	0.430189	0.917892	0.819107	0.529048	0.674059	0.69078	0.581493	0.387054	0.254031	0.478339	0.330815	0.57952	0.32013	0.225415	0.36397	0.387425	0.946837	0.37409	0.410079	0.529608	1.68391	1.55351	1.37596	1.63541
AAEL025439	0	0.052656	0	0	0.013164	0	0	0	0	0	0.058073	0	0	0.035758	0.0234577	0	0	0	0	0	0	0	0	0	0	0	0.148387	0	0	0.0370967	0	0.1115	0	0	0.027875	0.067332	0	0	0	0.016833	0	0	0	0	0	0.043418	0	0	0.158204
AAEL006227	4.09035	4.43093	3.91622	3.5582	3.99893	4.88289	3.33442	2.92504	3.89424	3.75915	6.43682	7.98085	7.3648	9.16521	7.73692	6.37277	7.06347	7.94134	7.01586	7.09836	5.18624	5.97409	4.79205	3.05582	4.75205	2.16254	3.13078	1.53986	1.29139	2.03114	1.22541	2.17214	0.94765	0.847698	1.29823	0.742188	1.80287	1.06679	1.25841	1.21757	2.6957	1.85152	2.37133	3.64378	2.64058	11.7169	9.31332	11.7749	13.5032
AAEL006216	6.05079	5.30012	7.09525	3.12758	5.39344	6.37348	6.15134	4.7675	7.62853	6.23021	1.16756	0.441032	0.610706	0.460874	0.670044	2.18097	2.40205	1.33761	2.3044	2.05626	5.0402	3.23497	4.54982	5.75864	4.64591	3.2953	4.17986	3.11067	4.01466	3.65012	3.58222	3.11413	4.27652	2.64263	3.40387	1.55214	2.07718	2.50938	1.7919	1.98265	0.828424	0.688328	1.02546	0.710535	0.813188	0.382853	0.446531	0.709653	1.04168
AAEL006214	0	0	0	0	0	0	0	0	0	0	0	0.115394	0	0.035655	0.0377622	0	0	0.036301	0	0.00907525	0.037876	0	0	0	0.009469	0	0	0.034587	0	0.00864675	0	0	0	0.027165	0.00679125	0	0	0	0	0	0	0	0	0	0	0	0	0	0
AAEL020929	3.08985	3.44103	2.66106	2.53773	2.93242	2.62502	2.3464	1.60745	2.50953	2.2721	5.17187	4.11237	3.44373	4.44968	4.29441	6.79261	7.27234	6.36604	7.06564	6.87416	3.63312	5.56957	4.38661	3.49518	4.27112	3.19737	6.13608	5.2435	3.97327	4.63756	1.82348	4.53881	3.11781	3.31037	3.19762	3.58609	3.88468	3.33264	3.68707	3.62262	4.59739	5.50519	5.39869	6.45273	5.4885	8.05365	10.5396	9.37575	8.02793
AAEL006226	33.4506	40.7378	28.3871	29.5645	33.035	43.4272	43.0727	117.016	47.4184	62.7335	385.93	447.931	508.73	397.003	434.898	192.34	130.01	164.639	110.368	149.339	108.78	90.8177	84.3968	79.4529	90.8618	65.3103	85.548	70.1097	39.601	65.1422	68.6671	53.1916	53.6196	62.0123	59.3726	110.354	77.5149	88.932	96.0454	93.2116	163.727	144.89	148.273	153.018	152.477	99.7636	153.351	77.8871	102.65
AAEL006219	0.146898	0.072065	0	0.03881	0.0644432	0.117309	0.035569	0.066429	0	0.0548267	0	0.03348	0.085296	0	0.029694	0	0	0.030754	0.080251	0.0277513	0.064616	0	0	0.067277	0.0329732	0.016864	0	0.03833	0.089269	0.0361158	0.11138	0.021364	0.247417	0.408411	0.197143	0.407247	0.168918	0.28466	0.520739	0.345391	0.402836	0.397241	0.679152	0.401911	0.470285	0.565901	0.12266	0.572024	0.034326
AAEL011305	0.477584	0.671927	0.325776	0.188738	0.416006	0.587598	0.14656	0.257366	0.297755	0.32232	0	0.458338	0.438739	0.163856	0.265233	0.209701	0.140856	0	0.367644	0.17955	0.246947	0.247304	0.371048	0.154674	0.254993	0.612332	0.253005	0.376267	0.345215	0.396705	1.0349	0.672752	0.529848	0.382313	0.654954	0.365424	0.504526	0.439549	0.460757	0.442564	1.37207	0.326522	0.799876	1.351	0.962366	1.36611	0.813548	0.491184	1.05591
AAEL024532	0.372414	0.605086	0.223834	0.198838	0.350043	0.434869	0.176437	0.235749	0.274781	0.280459	0.129761	0.198732	0.289561	0.184525	0.200645	0.086329	0.07876	0.062693	0.133614	0.090349	0.098778	0.388481	0.095843	0.156336	0.18486	0.828412	0.752336	0.922995	1.21586	0.9299	3.73997	2.69845	0.691181	1.03196	2.04039	6.62097	5.15232	3.75815	2.90802	4.60987	12.1139	14.0142	9.02675	10.8712	11.5065	17.0845	12.9439	9.68885	6.579
AAEL021586	0	0	0	0	0	0	0	0	0	0	0	0	0	0	0	0	0	0	0	0	0	0	0	0	0	0	0	0	0	0	0	0	0	0	0	0	0	0	0	0	0	0	0	0	0	0	0	0	0.017134
AAEL027202	1.90713	1.20953	0.752832	1.29595	1.29136	1.46097	0.530128	0.593153	0.287819	0.718018	0.191504	0.215939	0.147493	0.231918	0.196713	0.291693	0.059199	0	0.29493	0.161456	0.623948	0.233864	0.227648	0.479243	0.391176	2.06282	0.962079	1.03282	1.2408	1.32463	4.82662	3.71824	3.55736	5.96917	4.51785	5.56601	3.28662	5.11536	7.15173	5.27993	3.48278	4.00804	3.79749	4.07823	3.84164	3.96759	3.49555	4.11882	1.66582
AAEL020710	0	0.085192	0.025237	0	0.0276072	0	0	0	0	0	0.030842	0	0	0	0.0077105	0	0	0	0	0	0.03026	0.079837	0	0.020584	0.0326702	0.027692	0.066575	0.058173	0	0.03811	0.106709	0.03366	0.046145	0	0.0466285	0.0729	0.023964	0	0	0.024216	0.02432	0	0	0.200625	0.0562363	0	0	0.070092	0.078663
AAEL012633	0.020776	0.037092	0.036067	0.040825	0.03369	0.025329	0.000374	0.005104	0	0.00770175	0.000796	0	0.001058	0.011515	0.00334225	0	0	0	0.004439	0.00110975	0.006506	0	0.051347	0.006757	0.0161525	0.034044	0.015889	0.07257	0.055332	0.0444587	0.25573	0.095211	0.112914	0.090714	0.138642	0.196634	0.168637	0.092999	0.142132	0.1501	0.158661	0.201631	0.209258	0.087552	0.164275	0.109185	0.13854	0.068254	0.087723
AAEL020890	6.13444	4.2968	2.94305	2.6998	4.01852	3.47193	2.56267	0.68622	0	1.68021	1.12598	0.370176	0.305124	1.30729	0.777141	4.08927	1.20366	0.513749	1.06132	1.717	7.13521	1.34851	2.39037	6.58322	4.36433	14.7704	7.71129	7.53178	10.8789	10.2231	25.4637	22.1397	26.1176	29.8657	25.8967	15.7629	10.7181	13.211	21.3915	15.2709	6.61715	13.8177	13.1979	6.66115	10.0735	6.87173	7.21539	10.5117	3.17439
AAEL024237	8.90531	8.1074	5.3703	3.61627	6.49982	7.48241	4.5187	4.26619	4.37819	5.16137	4.33037	2.46024	2.65356	2.51074	2.98873	4.65331	1.52312	1.8463	1.99697	2.50493	5.70504	2.08046	2.80332	5.80837	4.0993	16.7523	9.15527	10.1492	10.524	11.6452	46.1274	29.0024	40.1055	39.5007	38.684	51.6855	31.796	43.8285	46.2653	43.3938	32.5937	44.7607	47.2096	30.1123	38.6691	22.152	21.5719	22.2263	14.6207
AAEL026985	0.141781	0.014367	0.121319	0	0.0693668	0.100501	0	0	0	0.0251252	0.078086	0	0.114413	0.072849	0.066337	0	0	0	0	0	0.154775	0	0	0	0.0386937	0.07276	0	0.072403	0.140796	0.0714897	0	0	0	0	0	0.036839	0.030643	0.025004	0.170342	0.065707	0.218521	0	0	0	0.0546302	0.094975	0	0.160513	0.159811
AAEL012635	15.8189	21.8514	9.97218	13.8964	15.3847	20.5416	14.1857	14.382	9.96411	14.7684	11.9083	10.4348	8.38808	9.99611	10.1818	13.2429	9.29222	7.79664	8.95094	9.82067	22.5634	19.459	20.2397	29.538	22.95	68.6726	53.1231	57.6352	58.6126	59.5109	73.2938	62.3318	72.0724	64.8537	68.1379	82.3391	66.7488	73.0446	73.4482	73.8952	111.611	103.021	122.27	116.786	113.422	105.868	108.417	79.6451	64.3167
AAEL012634	1.95739	1.29466	1.1021	1.15855	1.37818	2.58329	1.48423	0.814999	0.807442	1.42249	1.64119	0.692271	0.756247	0.768657	0.964591	1.25264	0.362589	0.157281	0.335507	0.527004	1.90516	0.705427	0.526659	0.741075	0.96958	1.37998	1.36238	0.83235	1.04469	1.15485	2.43417	1.4376	1.51403	2.14352	1.88233	2.67203	1.51653	1.08724	1.07397	1.58744	3.50459	2.40242	2.6357	1.98934	2.63301	4.62684	2.90989	2.11158	1.803
AAEL012636	12.5568	14.3367	8.96758	9.06426	11.2313	26.4958	16.1508	19.4591	16.2637	19.5924	6.67353	4.94685	5.5542	5.3831	5.63942	15.7621	18.8166	12.778	21.7923	17.2873	73.6962	61.3089	81.8642	91.2811	77.0376	106.109	150.207	113.347	113.26	120.731	149.996	103.81	159.19	106.449	129.861	138.048	152.1	162.142	163.062	153.838	405.242	302.874	451.603	561.072	430.197	116.617	195.596	173.052	115.963
AAEL012632	18.9783	29.3674	13.7633	19.4204	20.3824	22.5313	24.9968	18.9892	21.5747	22.023	38.7845	48.2568	43.5926	51.6775	45.5779	27.5283	34.0215	26.0339	25.9726	28.3891	29.9269	35.9064	28.5409	30.752	31.2815	36.478	44.5069	33.8858	37.2665	38.0343	43.9257	43.4808	44.1201	47.344	44.7177	49.7918	55.8138	53.4917	62.7813	55.4696	72.2516	64.26	74.5912	88.5548	74.9144	66.9359	100.048	51.3347	77.3078
AAEL012637	2.77529	3.91459	2.47626	2.95239	3.02963	3.08388	3.95299	3.27861	3.13269	3.36204	2.12118	3.1163	3.39845	2.6839	2.82996	2.65355	2.3546	2.3446	1.91333	2.31652	2.64397	3.49151	2.43165	1.98438	2.63788	2.62254	3.77753	1.89975	2.62928	2.73227	2.96397	3.72124	2.26364	2.36085	2.82742	3.34621	3.73448	2.9138	3.82553	3.45501	4.18592	5.25716	4.46852	4.58726	4.62471	8.71351	9.19	8.21063	8.74415
AAEL014318	5.09226	5.1992	5.90391	4.6272	5.20564	6.03105	2.16583	2.04299	2.03622	3.06903	1.6103	3.67869	1.73423	1.20828	2.05788	1.57143	1.20151	1.05587	1.76516	1.39849	0.51673	0.922414	4.05044	0.990269	1.61996	1.63209	2.10585	1.30877	2.63651	1.9208	2.69421	3.23238	1.90388	3.1872	2.75442	2.28311	2.13891	1.09889	1.96633	1.87181	8.55263	4.72341	7.37645	11.1914	7.96097	8.8938	6.29277	9.20968	12.1347
AAEL024066	3.66693	3.94942	3.46543	3.59096	3.66818	3.63274	1.58556	1.16388	1.41884	1.95026	1.06704	2.32379	1.17282	1.33176	1.47385	1.15941	0.772267	0.879015	1.14038	0.987768	0.425206	0.676362	2.94302	0.616028	1.16515	0.907506	1.19981	0.944318	1.45535	1.12675	1.82029	2.4532	1.39653	1.56067	1.80767	1.50225	1.85571	0.87727	1.35011	1.39634	5.80864	2.67964	5.91278	7.66541	5.51662	5.95259	4.38851	7.04599	7.6642
AAEL014317	12.7342	12.8412	10.3909	12.6642	12.1576	12.8314	8.39682	11.5831	11.5884	11.0999	10.6899	8.99686	8.83137	8.61039	9.28212	7.88605	5.36004	5.63865	6.55595	6.36018	7.64415	5.58839	6.03906	7.39456	6.66654	10.0918	7.96066	9.1183	8.28583	8.86414	12.7892	11.1476	11.1563	12.3826	11.869	13.8091	10.962	12.2428	11.2246	12.0596	21.6224	16.5176	23.6272	19.4921	20.3148	29.4448	20.2508	24.2779	17.3775
AAEL024639	0.059593	0.021572	0.011202	0.015521	0.026972	0.03112	0.030735	0.031828	0.014645	0.027082	0.075234	0.019415	0.032208	0.011466	0.0345808	0.027799	0.031514	0.025633	0.020033	0.0262448	0	0.007542	0	0.00345	0.002748	0.00536	0.010273	0.010245	0.00742	0.0083245	0.08418	0	0.019735	0.01755	0.0303662	0.009878	0.030797	0.00246	0.031468	0.0186508	0.002261	0.012425	0.029462	0	0.011037	0.012012	0.01611	0.045487	0.047422
AAEL014314	0.562839	0.70442	0.274811	0.351085	0.473289	0.919859	0.49172	0.567255	0.373482	0.588079	0.832109	0.638537	0.320735	0.346321	0.534425	1.55119	0.8474	0.766177	1.06699	1.05794	0.449247	1.24486	0.685626	0.546139	0.731468	0.846975	1.51262	0.888153	1.22009	1.11696	0.615412	1.92784	0.636413	0.579456	0.939781	0.87117	0.929734	0.536885	0.081674	0.604866	0.519468	1.43529	0.898719	1.25233	1.02645	1.82842	2.93028	1.85868	1.89477
AAEL014315	0.072883	0.090531	0	0.077404	0.0602045	0.096661	0.076129	0.067782	0.046398	0.0717425	0	0.068103	0	0.054597	0.030675	0	0	0	0.026793	0.00669825	0	0.017518	0.0752	0.013151	0.0264673	0.018116	0.049161	0.049099	0.035173	0.0378872	0	0.057251	0.035091	0.039298	0.03291	0.044682	0.125113	0.067446	0	0.0593103	0.196068	0.12274	0.184961	0.273712	0.19437	0.168086	0.332792	0.07351	0.058733
AAEL014316	0.202635	0.13462	0.157081	0.120962	0.153825	0.08364	0	0	0	0.02091	0	0	0	0.10737	0.0268425	0.070561	0.027106	0.068091	0	0.0414395	0	0.042352	0.014698	0	0.0142625	0.087808	0.078378	0.029205	0	0.0488478	0.078606	0.056611	0.080906	0.085412	0.0753837	0.137108	0.093584	0.134009	0.0228	0.0968752	0.135328	0.076764	0.092764	0.215041	0.129974	0.199021	0.128787	0.111185	0
AAEL000722	3.9076	6.11224	4.61468	5.60726	5.06044	7.85382	4.9687	5.12954	5.69901	5.91277	6.14381	5.91809	3.4991	5.87802	5.35975	7.14665	9.0022	6.50914	11.2418	8.47494	13.9005	13.4104	15.7484	12.757	13.9541	16.1583	14.6056	17.5874	7.94252	14.0734	3.84639	11.5705	5.22649	7.72017	7.0909	6.07099	7.24233	6.18485	6.34479	6.46074	6.97586	5.30866	6.80193	13.178	8.06612	14.7138	11.2611	14.5167	15.9394
AAEL000746	76.8888	79.1775	66.7413	80.6765	75.871	76.4109	99.8786	64.5641	69.9239	77.6944	138.55	177.489	117.942	197.346	157.832	319.268	384.114	324.851	404.564	358.199	462.725	452.239	506.105	558.887	494.989	522.463	513.64	579.164	562.464	544.433	322.419	356.006	281.689	322.705	320.704	171.142	216.61	219.367	211.941	204.765	48.7827	90.5277	41.3302	39.407	55.0119	12.0123	50.2627	34.2512	40.8067
AAEL000721	2.47871	3.87926	2.44276	2.6186	2.85483	3.39529	3.44162	2.66412	3.24146	3.18562	1.73307	1.39428	1.91622	1.10503	1.53715	0.536598	0.469449	0.676451	0.68036	0.590715	0.429751	1.33481	0.371793	0.417218	0.638392	1.20109	1.40037	0.988838	1.16775	1.18951	1.38576	2.54505	1.40581	1.90843	1.81126	1.36561	1.47128	1.06014	0.947905	1.21123	0.692966	1.58771	1.28996	2.38024	1.48772	4.12962	4.48539	5.29181	4.15261
AAEL020731	0.424213	0.404516	0.171273	0.265373	0.316344	0.63335	0.406151	0.504088	0.282881	0.456617	0.351109	0	0.152094	0.215586	0.179697	0.049914	0.092763	0.048538	0.42714	0.154589	0.417624	0.360377	0.193547	0.249596	0.305286	0.97961	0.581281	1.21707	0.922369	0.925082	1.08179	1.03693	0.696274	0.770876	0.896466	0.492173	0.706876	0.585079	0.333801	0.529482	0.708063	0.570058	0.566737	0.390445	0.558826	1.28277	0.791932	1.02857	1.60084
AAEL024347	0	0.044371	0	0	0.0110928	0.050292	0	0	0	0.012573	0	0	0	0	0	0.099579	0	0	0	0.0248948	0.050246	0	0.049999	0.034008	0.0335633	0.056341	0.032627	0	0	0.022242	0	0.072892	0	0	0.018223	0.038786	0	0	0	0.0096965	0	0	0.04486	0	0.011215	0.184659	0	0.163133	0
AAEL000750	7.38167	6.77689	7.22535	7.03784	7.10544	7.6563	7.58162	7.19498	6.60538	7.25957	9.80944	12.9145	10.4712	12.4687	11.416	10.229	13.916	10.2529	10.3624	11.1901	10.4673	11.0768	11.1153	11.4802	11.0349	7.19769	9.84468	8.27817	7.64622	8.24169	8.00073	8.12301	7.41804	7.85313	7.84873	9.95277	9.15836	9.53747	9.29048	9.48477	13.3121	11.9991	14.2218	13.2672	13.2	22.8102	20.1464	19.0394	19.1075
AAEL000724	3.19934	3.61111	3.79699	2.96289	3.39258	3.27578	2.91729	2.54083	2.61248	2.83659	1.96177	1.47441	1.29132	1.80335	1.63271	2.07893	1.93286	1.26181	2.29798	1.8929	2.39685	2.847	2.48035	2.38561	2.52745	3.28365	2.9567	2.52263	2.65144	2.85361	4.00073	4.10401	4.60289	4.41372	4.28034	5.70152	3.92901	5.41926	6.34826	5.34951	9.61196	5.95008	11.1459	12.3308	9.75969	10.818	10.4444	12.1782	9.90424
AAEL000729	0.068248	0.168506	0.172341	0.105503	0.128649	0.164524	0.031634	0.037447	0.114834	0.0871097	0.015546	0.00821	0.034539	0.052208	0.0276258	0.06794	0.015744	0.029651	0.086002	0.0498342	0.016169	0.089407	0.075788	0.054739	0.0590258	0.089593	0.04516	0.077459	0.029173	0.0603462	0.186095	0.023022	0.091231	0.067326	0.0919185	0.046807	0.132654	0.060249	0.072724	0.0781085	0.470427	0.271069	0.133624	0.533954	0.352268	0.149095	0.140339	0.142265	0.20914
AAEL028175	0	0	0	0	0	0	0	0	0	0	0	0	0	0	0	0	0.278964	0	0	0.069741	0	0	0.230163	0	0.0575408	0	0	0	0	0	0	0	0	0	0	0	0	0	0	0	0	0	0	0	0	0	0	0	0
AAEL000726	0	0	0	0	0	0	0	0	0	0	0	0	0	0	0	0	0.944854	0	0	0.236213	0	0	2.07036	0	0.51759	0	0	0	0	0	0	0	0	0	0	0.182172	0	0	0	0.045543	0	0	0	0	0	0	0	0	0
AAEL018813	0	0	0	0	0	0	0.118168	0	0	0.029542	0	0	0	0	0	0	0	0.209939	0	0.0524847	0	0	0	0	0	0	0	0	0	0	0	0	0	0	0	0	0	0	0	0	0	0	0	0	0	0	0	0	0
AAEL000733	0	0	0	0	0	0.08675	0.145271	0.036175	0	0.067049	0	0.04558	0	0	0.011395	0	0	0	0	0	0	0	0	0	0	0	0	0	0	0	0.052757	0	0	0	0.0131892	0.043308	0	0	0.033794	0.0192755	0.038021	0	0.051633	0.05497	0.036156	0	0	0	0.093463
AAEL019582	9.55424	9.08119	8.54053	10.0752	9.31279	10.3441	10.6856	17.5068	11.0624	12.3997	64.4439	58.4515	72.736	68.3024	65.9835	57.0182	65.8997	47.3589	62.6315	58.2271	48.9165	48.6229	51.8685	38.988	47.099	16.3559	27.4763	17.2659	15.6166	19.1787	16.2292	16.5065	12.4182	13.9429	14.7742	16.2632	15.3468	16.1115	14.1571	15.4696	20.8142	17.898	18.5734	20.1708	19.3641	29.5892	25.3221	19.7554	19.1619
AAEL000744	16.4997	25.9557	18.1506	16.0778	19.1709	15.121	17.3456	14.6165	15.9686	15.7629	10.5436	11.2169	12.3633	10.9598	11.2709	10.1495	7.33807	9.33042	10.8341	9.41302	9.84024	11.8294	10.1389	10.0817	10.4726	12.8632	11.4999	12.7848	13.4926	12.6601	18.3986	21.7422	17.2278	20.704	19.5181	28.9257	25.0907	24.3192	32.4714	27.7018	75.7044	61.8666	88.1259	85.3675	77.7661	82.9497	70.0858	76.5885	61.8212
AAEL000735	3.47397	1.83866	2.18031	2.85654	2.58737	2.04442	3.34111	1.91789	2.00411	2.32688	2.24452	2.39022	1.48934	2.34376	2.11696	3.33057	5.31007	2.74989	6.63364	4.50605	7.55237	9.35888	11.0104	17.7218	11.4109	25.7197	31.5099	31.576	40.351	32.2892	16.9116	19.4653	19.4626	22.8046	19.661	17.1392	12.8531	19.4142	24.8832	18.5724	7.7507	9.7058	9.40439	6.89678	8.43942	4.36477	5.82519	6.26832	4.29838
AAEL000751	0.005423	0.002387	0	0	0.0019525	0.023496	0	0.033262	0	0.0141895	0.014714	0	0	0.023862	0.009644	0.038079	0	0.065989	0.010387	0.0286138	0.001761	0.020952	0	0.030572	0.0133212	0.086653	0.064675	0.018578	0.060597	0.0576258	0	0.01179	0.046231	0.026945	0.0212415	0	0.016957	0.025663	0.015429	0.0145122	0.047587	0.010247	0.032044	0	0.0224695	0.029516	0	0.007532	0
AAEL000747	7.74557	5.87754	6.92448	7.06822	6.90395	8.34746	7.50221	5.60543	7.4722	7.23182	2.50537	2.53098	2.38158	2.49154	2.47737	3.92785	3.44874	1.78777	2.99222	3.03914	5.08865	3.88501	3.39405	3.87196	4.05992	4.00773	4.90264	2.67415	3.59606	3.79515	7.09822	5.39116	4.55495	5.28794	5.58307	7.55123	5.02192	5.35132	6.02936	5.98846	10.1932	8.37228	7.79869	9.75977	9.03099	11.0688	10.923	8.41318	10.1686
AAEL028934	0	0	0	0	0	0	0	0	0	0	0	0	0	0	0	0	0	0	0	0	0	0	0	0	0	0	0	0	0	0	0	0.037903	0	0	0.00947575	0	0	0	0	0	0	0	0	0	0	0	0	0	0
AAEL000725	0	0	0	0	0	0	0	0.153116	0	0.038279	0	0	0	0	0	0	0.051931	0	0	0.0129827	0	0	0	0	0	0	0.046113	0	0	0.0115283	0	0	0	0	0	0	0	0	0	0	0	0	0.199813	0	0.0499532	0	0	0	0
AAEL000730	9.17814	10.9191	9.03954	8.17536	9.32804	9.57522	9.6344	8.87085	8.85513	9.2339	11.206	11.1657	10.2691	11.3337	10.9936	8.99102	8.61648	5.76772	8.8263	8.05038	8.04391	11.0057	7.70979	7.76664	8.63152	7.85768	10.0554	7.16744	6.92307	8.0009	9.33776	8.92794	7.69184	7.5768	8.38358	9.42409	9.44443	8.11864	7.48348	8.61766	13.9502	13.787	13.4433	12.4797	13.4151	19.2674	21.1884	17.0441	19.4038
AAEL020423	0	0	0	0	0	0	0	0	0	0	0	0	0	0	0	0	0	0	0	0	0	0	0	0	0	0	0	0	0	0	0	0	0	0	0	0	0	0	0	0	0	0.057717	0	0	0.0144292	0	0	0	0
AAEL018120	18.7642	8.73474	11.6051	12.0278	12.783	16.0935	11.0078	15.8823	16.2221	14.8014	2.68536	2.12699	2.27862	1.62594	2.17923	2.23941	1.9026	0.641977	1.47558	1.56489	2.77109	3.97354	1.44954	1.50901	2.4258	2.44197	4.44331	1.08023	1.31813	2.32091	5.06326	4.99832	4.38634	2.90359	4.33788	8.23152	4.44435	5.31797	5.24836	5.81055	15.9355	9.4169	11.7613	11.1789	12.0731	23.8876	16.8731	14.2101	19.6815
AAEL019423	1.8265	1.64248	1.21574	1.35773	1.51061	1.90205	1.17745	0.996884	1.37318	1.36239	0.683392	0.60277	0.696931	0.838146	0.70531	0.804627	0.936168	0.140344	0.809095	0.672558	0.9336	0.846179	0.990451	1.11267	0.970725	1.4234	1.38546	0.676891	1.4495	1.23381	2.56024	1.76067	1.59162	1.99133	1.97597	2.45795	1.83745	1.77548	1.90298	1.99347	4.98734	4.23107	4.15347	3.81523	4.29678	7.44672	7.669	4.65547	6.68029
AAEL023348	8.53525	5.18237	9.26907	10.726	8.42817	11.4931	8.66881	12.7102	12.4111	11.3208	16.8834	14.7944	20.8287	13.8354	16.5855	9.48474	6.09183	3.45489	5.32854	6.09	7.52045	5.72919	5.36889	5.43205	6.01264	4.11451	4.89619	3.2402	2.95458	3.80137	4.56857	2.93131	2.75589	3.19493	3.36267	4.37041	2.49372	3.70673	3.8946	3.61637	7.89836	5.46568	7.92415	8.08736	7.34389	10.8579	7.25408	8.59722	11.176
AAEL022338	0	0	0	0	0	0	0	0	0	0	0	0	0.045119	0	0.0112797	0	0	0	0	0	0	0	0	0	0	0	0.044761	0	0.027761	0.0181305	0	0	0	0	0	0	0	0.023292	0	0.005823	0	0	0	0	0	0	0	0.223739	0
AAEL016102	0	0	0	0	0	0.064583	0	0	0.179059	0.0609105	0.242568	0	0	0	0.060642	0	0	0	0	0	0	0	0	0	0	0	0	0	0	0	0	0	0	0	0	0	0	0	0	0	0	0	0	0	0	0	0.131744	0.388953	0
AAEL023481	0	0	0	0	0	0	0	0	0	0	0	0	0	0	0	0	0	0	0	0	0	0	0	0	0	0	0	0	0	0	0	0	0	0	0	0	0	0	0.058061	0.0145153	0	0	0	0	0	0	0	0	0
AAEL025731	0	0	0	0	0	0	0	0	0	0	0	0	0.070333	0	0.0175833	0	0	0	0	0	0	0	0	0	0	0	0	0.17642	0	0.044105	0	0	0	0	0	0	0	0	0	0	0	0	0	0	0	0	0	0	0
AAEL021336	0	0.020038	0	0	0.0050095	0.169087	0.441595	0	0.255097	0.216445	0	0	0.117663	0	0.0294158	0.443451	0	0	0	0.110863	0	0	0.132672	0.175405	0.0770192	0	0	0	0.051148	0.012787	0	0.09551	0	0.146255	0.0604413	0	0	0	0	0	0.094056	0	0	0.118317	0.0530933	0.101641	0.09403	0	0.147103
AAEL001333	0	0	0	0	0	0	0	0	0	0	0	0.199378	0	0.184814	0.096048	0	0.189888	0.250255	0.21431	0.163613	0.255225	0.35843	0.19028	0	0.200984	0	0.186373	0	0	0.0465933	0	0	0	0	0	0	0	0	0	0	0	0	0	0	0	0	0	0.068902	0
AAEL001326	0.662923	1.0798	1.99689	0.367831	1.02686	1.87059	1.44047	0.910599	1.15951	1.34529	2.41703	2.20427	1.63684	2.42006	2.16955	2.28171	2.77891	2.16957	2.44713	2.41933	2.49378	2.07703	2.46378	1.7424	2.19425	3.07042	1.64964	2.60271	1.6485	2.24281	0.977727	1.68083	1.17316	1.04567	1.21935	0.510044	0.647789	0.409592	0.465804	0.508307	0.231492	0.682111	0	0.818553	0.433039	0.668832	0.342811	0.548852	0.276131
AAEL026598	0.110752	0.523195	0	0	0.158487	0.080117	0	0.19457	0.156991	0.10792	0.022022	0.066736	0	0.06144	0.0375495	0.102248	0.08517	0.064267	0	0.0629212	0	0.114087	0.021012	0.045614	0.0451783	0	0.024097	0	0.060186	0.0210707	0	0	0.093394	0	0.0233485	0.06341	0	0	0	0.0158525	0.018935	0	0.122864	0	0.0354498	0.143743	0	0	0.122417
AAEL023792	0.055086	0	0	0	0.0137715	0	0	0	0	0	0	0	0	0	0	0	0	0	0	0	0	0	0	0	0	0	0	0	0	0	0	0	0	0	0	0	0	0	0	0	0	0	0.073261	0	0.0183153	0.217565	0	0	0
AAEL022382	0.629684	0.806712	0.293606	0.489005	0.554752	0.557975	0.735619	0.551097	0.523618	0.592077	0.526001	0	0.288334	0	0.203584	0.399149	0.073744	0.05504	0.412393	0.235081	0.33185	0.187102	0.224882	0.233604	0.24436	0.632255	0.535212	0.852655	0.472802	0.623231	1.10409	0.550203	0.829444	1.18724	0.917744	1.48967	0.58378	0.814412	1.43871	1.08164	2.14511	1.47009	1.15876	1.55682	1.58269	2.50179	1.64455	2.19984	1.44973
AAEL001356	62.0381	71.833	56.5707	57.4482	61.9725	68.2626	62.5336	55.9447	49.6982	59.1098	98.8051	104.561	113.681	101.223	104.568	57.7021	62.1918	55.8478	47.4634	55.8013	51.8811	65.4568	52.9288	62.4443	58.1778	52.2897	58.9475	54.2731	50.4668	53.9943	64.767	65.2406	60.5866	61.9677	63.1405	58.9624	63.6191	59.7977	49.4105	57.9474	87.6138	82.8936	95.4316	109.175	93.7786	168.082	154.339	170.358	169.233
AAEL001341	5.36707	7.29995	7.60805	6.49296	6.69201	7.91204	6.59363	4.93091	5.8339	6.31762	3.39082	3.26119	4.278	4.21647	3.78662	3.95432	3.65259	3.92718	2.81971	3.58845	4.61961	5.05071	3.18869	3.6356	4.12365	4.24114	6.18528	5.01293	4.88946	5.0822	4.22137	8.16065	6.30617	6.22377	6.22799	5.49383	6.72349	6.79796	5.4936	6.12722	8.21219	7.21451	11.4889	10.8954	9.45276	18.1675	14.7337	18.0278	15.3224
AAEL026336	0.057757	0.016145	0.018205	0.01018	0.0255717	0.025188	0.042649	0.032764	0.011591	0.028048	0.042128	0.015366	0.015946	0	0.01836	0.061625	0.025092	0.037609	0.005285	0.0324028	0.021518	0.005969	0.01674	0	0.0110568	0.01537	0.00736	0.016381	0.017617	0.014182	0.054083	0	0.007875	0.00463	0.016647	0.019517	0.021999	0	0.014976	0.014123	0	0.025076	0.02975	0	0.0137065	0.030633	0.01095	0.02039	0.038509
AAEL001343	0.01852	0.044966	0	0.032938	0.024106	0	0	0.016268	0	0.004067	0	0.019883	0	0	0.00497075	0	0.036994	0	0	0.0092485	0	0.053438	0	0.01373	0.016792	0	0.042445	0	0	0.0106112	0	0	0.046168	0	0.011542	0	0.015984	0.012702	0	0.0071715	0.048486	0	0	0	0.0121215	0.024771	0.027112	0	0
AAEL027407	0	0	0	0	0	0	0	0	0	0	0	0	0	0	0	0	0	0	0	0	0	0	0	0	0	0	0	0	0	0	0	0	0	0	0	0	0	0	0	0	0	0	0	0	0	0	0	0	0.096978
AAEL023709	0	0	0	0	0	0	0	0.0783	0.289508	0.091952	0	0	0	0.108731	0.0271827	0.400092	0.207745	0	0	0.151959	0	0.424015	0	0	0.106004	0.408053	0.293239	0.158608	0	0.214975	0.264551	0	0.933934	0	0.299621	0	0.091168	0	0.675248	0.191604	0	0	0	0	0	0	0.631392	0.114338	0
AAEL001355	0	0.231394	0.115749	0.275555	0.155674	0.476788	0.146304	0.130938	0.132314	0.221586	0	0	0	0	0	0	0.063053	0	0	0.0157632	0.067915	0.156473	0	0.09209	0.0791195	0.124737	0	0	0.40648	0.132804	0	0.236428	0.09806	0.283609	0.154524	0.325269	0.260048	0	0	0.146329	0.227834	0.232522	0.416484	0.667351	0.386048	1.11593	0.37353	0.598916	0.265
AAEL001328	0.323374	0.151496	0	0.050955	0.131456	0.073871	0	0	0.179155	0.0632565	0.043469	0.043312	0	0.120176	0.0517393	0	0	0	0.10056	0.02514	0	0.118307	0	0.080478	0.0496962	0.060148	0.170566	0.223286	0.414761	0.21719	0.098259	0.185441	0.16064	0.317917	0.190564	0.060358	0.168875	0	0	0.0573082	0.243507	0.238761	0.508981	0.180209	0.292865	0.094913	0	0	0.254005
AAEL023926	0	0	0	0	0	0	0	0	0	0	0	0	0	0	0	0	0	0	0	0	0	0	0	0	0	0	0	0	0	0	0	0	0	0	0	0	0	0	0	0	0	0	0	0	0	0.048898	0	0	0
AAEL001358	1.27479	0.658996	0.753904	1.02274	0.927608	0.959162	0.966543	1.55903	0.730216	1.05374	0.553901	0.163495	0.473666	0.697649	0.472178	0.9137	0.147711	0.097144	0.300952	0.364877	0.297491	0.485328	0.238409	0.677425	0.424663	1.03446	0.695641	1.00774	0.727651	0.866374	1.14538	1.57948	1.3893	1.65095	1.44127	1.68485	0.572458	1.54272	1.17062	1.24266	2.08176	2.0204	1.93763	2.30861	2.0871	4.43842	2.91742	3.23676	3.02891
AAEL001346	0	0	0	0	0	0	0	0	0	0	0	0	0	0	0	0	0	0	0	0	0	0	0	0	0	0	0	0	0	0	0	0	0	0	0	0	0	0	0	0	0	0	0	0.120878	0.0302195	0	0	0	0
AAEL001325	0.268276	0.164288	0.135986	0.714964	0.320879	0	0.180255	0.133089	0.276113	0.147364	0	0.254502	0	0.078637	0.0832848	0.061043	0	0	0	0.0152607	0	0	0.081234	0	0.0203085	0	0	0.213588	0.151982	0.0913925	0.290652	0.649007	0.190655	0.248641	0.344739	0	0.065934	0	0.062899	0.0322083	0.752701	0.828741	0.611655	1.54592	0.934754	0.392995	0.093885	0.253894	0.599572
AAEL019936	2.7163	3.32939	2.15655	2.47407	2.66908	2.70279	2.10839	1.61951	2.41331	2.211	1.96808	1.32788	1.27903	1.599	1.5435	2.26879	1.21013	1.01416	1.66507	1.53954	1.835	2.32614	1.71526	1.77288	1.91232	2.64216	2.8143	3.07844	2.63503	2.79248	3.22738	3.34409	3.05124	3.85665	3.36984	2.87984	3.62856	3.82362	2.82341	3.28886	2.54873	3.21113	3.04544	3.844	3.16232	6.80437	5.82794	5.70999	5.86575
AAEL007466	4.66117	6.28883	4.90279	4.10501	4.98945	5.02852	5.1152	4.88763	4.87929	4.97766	3.28317	3.31099	3.89517	4.60428	3.77341	4.16882	3.69974	4.56766	2.86032	3.82414	3.15648	3.93473	2.73069	2.3962	3.05452	5.35462	4.04072	3.64995	2.62579	3.91777	3.69065	5.22079	5.09609	3.66917	4.41918	6.19445	6.49759	6.1304	6.24647	6.26723	11.0294	8.51767	10.5078	11.7762	10.4578	17.5158	17.3765	19.2338	15.5811
AAEL027014	0.328337	0	0	0	0.0820842	0	0	0	0	0	0	0	0	0	0	0	0	0	0	0	0	0	0	0	0	0	0	0	0	0	0	0	0	0	0	0	0	0	0	0	0.154158	0	0.080091	0	0.0585622	0	0	0	0.095264
AAEL007462	4.27957	5.2863	3.62819	4.58142	4.44387	4.71632	4.67508	3.1336	4.80347	4.33212	6.09568	7.35648	7.99109	7.05198	7.12381	5.59858	7.57693	5.0481	6.96248	6.29652	5.62337	5.70236	6.18542	6.28014	5.94782	5.01113	4.67967	3.59809	3.84056	4.28236	5.30505	4.86623	4.2979	3.98395	4.61328	5.30158	4.43484	4.59914	5.98968	5.08131	8.43687	6.62011	8.32521	7.49371	7.71897	11.896	9.48569	9.9996	10.4236
AAEL007473	44.2131	40.7896	35.1178	37.1517	39.3181	34.1902	36.5808	24.6269	32.7501	32.037	10.4606	13.7939	14.427	11.0224	12.426	9.36168	14.671	13.9252	14.444	13.1005	11.7126	13.6227	13.7422	14.4045	13.3705	21.3649	20.0667	18.4756	21.6557	20.3907	36.3954	29.1023	28.5542	28.0649	30.5292	32.1292	32.0887	26.9463	49.5621	35.1816	102.845	61.1321	111.151	146.215	105.336	117.477	77.622	131.277	141.376
AAEL019884	0.152733	0.203872	0.38725	0	0.185964	0.109795	0.636304	0	0.142375	0.222118	0	0	0	0	0	0	0.087248	0	0.285807	0.0932638	0	0	0	0	0	0	0	0	0	0	0.131915	0	0	0	0.0329788	0	0	0	0.136895	0.0342237	0.316273	0	0	0.476912	0.198296	0.600238	0	0.57849	1.27427
AAEL023657	3.98812	4.56783	3.14698	2.59657	3.57488	4.29295	5.3403	4.636	5.62251	4.97294	1.15749	1.61975	0.882999	1.6935	1.33843	2.02331	2.05554	1.27602	1.45248	1.70184	2.0186	3.91722	3.44939	2.29345	2.91966	6.68023	9.36961	9.01019	12.7113	9.44285	13.5449	12.6584	13.2639	11.9961	12.8659	11.079	14.4422	14.1885	11.8565	12.8915	13.7324	12.0704	16.7384	17.0009	14.8855	11.8658	15.5257	16.8284	14.6241
AAEL019885	9.75738	5.66771	5.92153	9.40284	7.68736	9.09249	5.68157	5.97775	5.21586	6.49192	4.57306	4.34409	3.01825	4.67444	4.15246	4.49174	3.75128	2.44123	3.57459	3.56471	4.47731	4.81679	4.1333	3.62372	4.26278	5.57487	6.43974	4.26689	4.92768	5.3023	8.02204	6.96188	6.01229	5.17533	6.54289	8.53084	6.71112	4.87909	7.60993	6.93275	16.0685	7.69764	15.7074	9.49298	12.2416	26.4881	19.7331	13.8055	13.946
AAEL020883	0.135558	0	0	0	0.0338895	0.076596	0	0	0	0.019149	0	0	0	0	0	0	0	0	0	0	0	0	0	0	0	0	0.271766	0	0	0.0679415	0	0.140859	0	0	0.0352147	0.3776	0	0.226268	0.439745	0.260903	0.15872	0	0.253972	0	0.103173	0	0	0.437355	0
AAEL007472	6.88962	8.42188	7.41624	8.0834	7.70279	7.45851	6.83926	5.08052	5.89288	6.31779	10.1314	11.5163	9.78931	13.9293	11.3416	15.6234	19.7151	16.2931	18.9615	17.6483	13.8861	19.5017	18.4346	17.3244	17.2867	7.7078	11.7722	11.1734	8.865	9.8796	4.80068	7.98261	5.06739	4.38179	5.55812	4.57748	4.64788	5.07725	3.95815	4.56519	6.69365	7.5798	7.27488	7.24617	7.19862	12.2224	13.4755	10.1994	13.5647
AAEL014830	1.98799	1.3157	0.309329	1.08883	1.17546	0.045989	0.297791	0	0.973741	0.32938	0	0.096544	0	0	0.024136	0.041682	0	0	0.249967	0.0729122	0.1426	0.087904	0.323564	0	0.138517	0.111578	0.034743	0.043101	0.06241	0.062958	0.055874	0.18576	0.036243	0.353077	0.157739	0	0	0	0	0	0.160663	0	0	0.058217	0.05472	0	0	0	0.247461
AAEL013554	0.11939	0.049857	0	0.056714	0.0564902	0	0	0.07482	0.038865	0.0284212	0.094297	0	0	0.085491	0.044947	0.506162	0.567629	0.418	1.47526	0.741763	4.12422	4.07198	4.94381	9.39105	5.63276	29.2416	23.7782	30.3196	41.7548	31.2735	55.2202	43.7562	60.9794	79.0977	59.7634	132.809	67.1339	111.883	117.066	107.223	70.109	73.848	75.9421	40.9944	65.2234	5.23049	17.0196	9.14856	4.99315
AAEL014019	1.79664	1.03384	0.789198	1.311	1.23267	1.26926	1.35517	2.00434	1.11901	1.43694	1.14404	1.42169	0.439852	0.988316	0.998474	3.79371	1.96015	1.93067	3.43135	2.77897	3.90959	7.14706	6.75701	7.58664	6.35008	11.9067	11.7943	13.5828	17.233	13.6292	23.5995	19.8929	24.6127	28.0812	24.0466	39.8771	25.8554	40.0917	44.3415	37.5414	30.5599	29.4936	30.9236	16.8588	26.959	8.24696	10.8373	7.4003	5.12204
AAEL014021	2.12199	1.73421	1.51843	1.86002	1.80866	1.98672	1.86576	1.7842	1.86905	1.87643	2.27416	1.49888	1.20453	1.80661	1.69604	2.70487	2.47899	1.4842	2.3145	2.24564	2.17672	2.66339	2.33373	2.04777	2.3054	2.15802	2.60992	1.87325	1.84021	2.12035	1.85319	2.22174	1.34805	1.36103	1.696	1.32474	1.83382	1.59122	1.54937	1.57479	2.36452	2.6809	2.27592	3.1887	2.62751	4.90082	7.10623	4.66553	5.54833
AAEL014022	42.6419	31.732	37.8895	42.4876	38.6878	47.4092	37.7232	39.0237	42.311	41.6168	62.5879	53.4649	54.4802	69.1495	59.9206	73.2484	62.2225	26.2701	50.0567	52.9494	60.0429	51.2523	47.0792	37.7921	49.0416	28.0287	46.8643	26.2202	20.0948	30.302	18.6257	17.8228	13.8456	15.6995	16.4984	14.4564	18.6863	14.5778	12.2635	14.996	26.9118	20.5348	21.3078	27.3247	24.0198	48.6273	33.4415	32.7289	37.9051
AAEL025392	0	0	0	0	0	0	0	0	0	0	0	0	0	0.005489	0.00137225	0	0	0	0	0	0	0	0	0	0	0	0	0.004204	0.007956	0.00304	0.082249	0.024474	0	0	0.0266807	0.025319	0	0	0.019011	0.0110825	0	0	0	0.037493	0.00937325	0	0	0.014284	0
AAEL014020	0.05045	0.011476	0.064468	0.022055	0.0371122	0	0	0.071919	0.048055	0.0299935	0	0.019363	0	0	0.00484075	0.050157	0.030941	0.013644	0	0.0236855	0.050843	0.07522	0.061802	0.012122	0.0499967	0.080802	0.125703	0	0.081317	0.0719555	0.316975	0.198787	0.180484	0.151059	0.211826	0.270705	0.192102	0.240142	0.354611	0.26439	0.298988	0.206869	0.149804	0.092316	0.186994	0.06039	0	0.098125	0.019786
AAEL006539	5.89916	6.04103	4.5414	5.37188	5.46337	5.58455	5.07071	6.23701	4.4469	5.33479	7.13096	5.43905	5.41057	6.46425	6.11121	5.78205	5.18612	4.82045	3.83174	4.90509	5.53202	4.6039	5.04485	4.73255	4.97833	5.48717	7.13886	5.78562	4.51897	5.73266	6.22908	5.13551	4.71704	5.56698	5.41215	4.38878	4.71447	4.80786	4.66901	4.64503	7.29346	4.43059	6.89444	7.77756	6.59901	9.68135	9.74601	9.07873	10.2184
AAEL006560	25.8553	28.0916	23.8963	27.0575	26.2252	25.8863	28.0006	21.8232	25.3451	25.2638	39.7186	38.6616	35.2975	44.8428	39.6301	43.6954	53.1917	48.4951	46.9172	48.0748	36.5369	41.4477	41.0194	38.6099	39.4035	17.3771	24.0958	17.2026	17.3088	18.9961	16.8224	19.9454	15.7714	17.0088	17.387	11.219	15.9917	16.58	16.3474	15.0345	22.648	16.9604	21.6549	24.4709	21.4335	38.5084	26.1601	32.7182	39.1252
AAEL006552	16.9095	15.2793	14.1234	16.9931	15.8263	18.0736	15.6687	16.5956	15.4284	16.4416	11.3936	10.0722	9.494	11.4675	10.6068	21.7896	23.0122	13.382	22.1717	20.0889	34.8171	26.4709	33.0445	40.3365	33.6673	39.0275	36.827	39.1624	39.2558	38.5682	72.0303	48.6681	59.2777	63.0401	60.7541	87.9874	47.5685	74.9014	84.3336	73.6977	102.869	74.9983	91.5692	81.4378	87.7185	49.7111	54.2904	43.999	40.3938
AAEL006550	29.1237	32.0063	28.3105	34.2451	30.9214	33.9019	25.3007	29.3346	31.2871	29.9561	56.4622	42.7143	47.4125	60.8864	51.8689	66.6548	70.5835	69.0737	60.5482	66.7151	45.8706	36.2932	45.0676	43.7625	42.7485	40.5254	39.7888	48.6519	37.8152	41.6953	38.8818	35.0134	37.0633	34.8389	36.4493	44.1552	31.7004	41.5859	44.7152	40.5392	61.4501	44.3399	58.0588	62.4591	56.577	82.32	57.6441	71.4082	57.2027
AAEL006538	47.2976	50.2788	42.7165	50.7157	47.7521	46.2577	44.9926	48.7984	46.2594	46.577	31.3554	30.915	28.0275	31.1042	30.3505	30.0644	30.6872	27.2077	29.6346	29.3985	35.2791	35.8781	35.3971	40.62	36.7936	58.8509	63.8488	61.8948	54.5725	59.7918	66.9876	69.1102	62.9365	63.6778	65.678	84.6694	69.5568	77.7877	77.4406	77.3636	93.7045	87.5059	100.521	78.0948	89.9566	96.4247	83.9237	99.0534	78.1798
AAEL025065	11.6606	11.5593	9.73626	10.2377	10.7984	12.3841	9.88797	10.1699	9.87477	10.5792	7.2779	7.98202	8.02429	8.17466	7.86472	7.97307	7.8626	6.08289	6.5929	7.12786	7.82997	8.60798	6.6101	6.71402	7.44052	7.15385	10.9112	6.4613	7.46608	7.99811	8.24519	8.88193	6.55466	7.53346	7.80381	8.92242	8.91369	7.12247	9.37162	8.58255	13.5022	12.7084	13.975	16.8713	14.2642	23.6573	26.5078	22.8147	24.0716
AAEL006548	0.460667	0.824026	0.866833	0.451883	0.650852	0.779227	0.336405	0.514672	0.175983	0.451572	1.23453	0.405929	0.507421	0.476294	0.656044	0.507816	0.181432	0.449102	0.211123	0.337368	0.23919	0.656428	0.205946	0.642353	0.435979	0.793293	0.594763	0.860125	1.27459	0.880694	2.07145	1.8837	2.22146	1.90953	2.02153	2.95954	2.10717	1.55039	2.66318	2.32007	2.05532	1.29257	1.6061	1.7093	1.66582	1.35046	1.40032	2.0855	2.15952
AAEL006556	0.168667	0.09635	0	0.106439	0.092864	0.051125	0	0.074078	0	0.0313007	0.042154	0.023179	0.01121	0.086087	0.0406575	0.161188	0	0.088086	0.111865	0.0902847	0.137864	0.084984	0.148066	0.208193	0.144777	0.172538	0.231631	0.132223	0.130086	0.166619	0.108035	0.067021	0.240365	0.060755	0.119044	0.10657	0.121552	0.068044	0.103459	0.0999063	0.303645	0.410226	0.188487	0.510111	0.353117	0.532212	0.249631	0.288206	0.215317
AAEL017516	3744.31	3263.47	3303.29	3681.39	3498.11	3879.62	3364.04	3610.44	3550.46	3601.14	3112.33	2880.8	2971.54	2807.56	2943.06	2971.69	2638.06	2948.33	2751.11	2827.3	2786.24	2656.46	2863.37	2482.53	2697.15	2580.69	2598.99	2470.33	2367.84	2504.46	2670.64	2454.06	2487.01	2405.33	2504.26	2601.29	2376.89	2396.13	2532.2	2476.63	2768.19	2163.41	2576.96	2526.84	2508.85	3982.91	3141.69	3571.2	3834.6
AAEL006540	0.186462	0.176507	0	0	0.0907422	0.193428	0.457091	0	0.30563	0.239037	0	0	0	0.090096	0.022524	0	0.165625	0	0	0.0414062	0	0	0	0	0	0	0	0	0	0	0	0	0.051878	0	0.0129695	0	0	0.077549	0	0.0193873	0.115275	0.155472	0	0.166664	0.109353	0	0.111645	0.451787	0.282902
AAEL006541	0	0	0	0	0	0	0	0	0	0	0	0	0	0	0	0	0	0	0	0	0	0	0	0	0	0	0	0	0	0	0	0	0	0	0	0	0	0	0	0	0	0	0	0	0	0	0	0.033318	0
AAEL006536	0	0	0	0	0	0	0	0	0	0	0.088299	0	0	0	0.0220748	0	0	0	0	0	0	0	0	0	0	0	0	0	0	0	0	0	0	0	0	0	0	0	0	0	0	0	0	0	0	0.148671	0	0	0
AAEL026791	2.91034	3.32217	2.92418	4.06409	3.30519	3.23984	3.19526	4.07844	4.32614	3.70992	2.72577	3.76997	4.41903	4.1671	3.77047	5.20042	4.29322	5.07145	4.05637	4.65536	2.58671	3.52891	3.62173	2.74222	3.11989	2.63156	3.51718	2.50176	2.15711	2.7019	2.49842	3.27854	2.60161	2.60636	2.74623	2.2424	2.15395	2.18426	2.56204	2.28566	3.83186	2.87071	4.00181	4.14303	3.71185	11.4171	9.49671	11.1523	13.0452
AAEL006564	33.552	32.0921	26.1432	34.4897	31.5692	28.3454	27.6227	27.6649	27.493	27.7815	24.5117	29.1525	31.0471	29.2101	28.4804	25.3736	23.5732	21.4632	20.836	22.8115	20.7294	22.2089	22.3872	18.331	20.9141	17.1433	20.157	14.5928	16.4006	17.0734	18.5378	19.8869	17.3338	18.4883	18.5617	20.2558	17.8508	17.6942	21.9321	19.4332	49.3114	37.266	52.4766	59.539	49.6483	71.4454	59.0494	62.1266	69.627
AAEL006547	5.53937	5.46952	3.96941	4.22009	4.7996	4.98832	5.39087	5.50666	4.19802	5.02097	6.59622	6.00213	5.25142	5.55329	5.85076	7.69859	7.14144	5.61759	8.46784	7.23136	7.78118	10.2262	9.3087	7.16259	8.61967	4.73785	7.65568	5.51076	4.61912	5.63085	3.97118	5.39817	4.15023	3.22437	4.18599	4.13569	6.65847	4.90997	3.318	4.75553	7.11446	8.11867	7.71366	8.68047	7.90681	10.0692	11.0293	14.2306	13.3098
AAEL006566	17.3697	18.3972	14.5779	18.4346	17.1948	15.3527	16.3831	17.2553	18.7026	16.9234	15.3775	17.8804	17.2796	16.9311	16.8671	17.5941	19.6017	19.2314	19.6013	19.0071	15.7713	17.7251	16.7271	17.7877	17.0028	13.9801	12.7475	15.5757	15.9879	14.5728	10.5241	10.4842	13.0302	11.9574	11.499	12.5606	12.2055	12.7713	11.1208	12.1646	18.3822	22.4725	22.7578	22.1865	21.4498	42.0313	31.1375	38.1451	35.1795
AAEL006557	24.5168	31.78	21.12	25.7478	25.7912	21.3731	25.5351	24.0982	23.8112	23.7044	38.1181	43.1108	31.7348	33.229	36.5482	31.9494	31.3902	46.5042	37.6989	36.8857	34.2924	43.5366	41.1595	30.0707	37.2648	28.8131	37.0689	29.3092	26.7885	30.495	24.0633	33.3136	25.3581	23.9006	26.6589	26.2615	34.5455	22.1385	17.4774	25.1057	31.3239	41.3964	37.824	36.0286	36.6432	70.4275	74.1456	66.5534	75.4848
AAEL006551	22.657	23.9634	23.5229	22.7691	23.2281	25.3346	24.4708	23.503	19.9609	23.3173	14.8618	14.7747	14.9711	16.6822	15.3224	16.9952	14.546	18.2544	16.1735	16.4923	15.3026	15.2362	16.0592	16.8935	15.8729	14.6323	14.8035	14.3689	13.984	14.4472	13.6549	14.2493	12.0231	12.0173	12.9862	13.7598	13.916	14.3701	11.2868	13.3332	20.8212	21.7155	22.1006	22.2247	21.7155	40.6107	28.4441	42.275	33.3055
AAEL006553	1.49872	2.02485	1.67818	1.49551	1.67431	2.15115	2.12555	1.54845	1.44454	1.81742	2.20916	2.17957	1.618	2.11452	2.03031	1.89894	2.10928	1.23688	1.70483	1.73748	2.06258	2.19481	1.74709	1.89693	1.97535	1.42349	2.16547	1.23015	1.42672	1.56146	1.128	1.71159	1.11421	1.43889	1.34818	1.48578	1.60712	1.72992	1.65404	1.61922	3.30326	2.35082	2.43554	2.80814	2.72444	5.43192	3.68603	3.38802	3.21029
AAEL006543	1.92471	1.53553	1.54441	1.68441	1.67227	1.87696	1.21195	1.78201	1.30895	1.54497	1.50737	0.98819	1.17397	1.58641	1.31399	1.21555	1.15454	0.828339	1.22668	1.10628	1.22794	0.934599	0.950311	1.0311	1.03599	1.22009	1.31233	1.64016	0.915504	1.27202	1.18575	1.13141	0.886301	0.768913	0.993093	1.20357	1.47247	1.25077	1.20194	1.28219	2.53903	2.25032	2.36889	3.06695	2.5563	3.34172	2.53793	2.42532	2.04229
AAEL006542	0.042564	0.034448	0.018479	0	0.0238727	0.029719	0	0.069417	0.051702	0.0377095	0.047279	0	0	0.0655	0.0281948	0	0.02153	0	0.13254	0.0385175	0	0.733595	0.732263	1.01069	0.619136	1.42193	0.821098	2.17322	3.72391	2.03504	0.819709	1.65415	1.22788	3.62926	1.83275	1.502	1.39582	0.525754	1.76372	1.29682	2.16216	2.35026	1.39249	2.3992	2.07603	0	0.103225	0.048839	0.144735
AAEL006563	0	0	0	0	0	0.033533	0	0	0	0.00838325	0	0.156985	0.07635	0.145842	0.0947942	0.362277	0.150852	0.378798	0.902527	0.448613	0.304346	2.05538	1.72402	3.55192	1.90892	9.0246	3.53946	9.94596	14.5236	9.2584	6.18671	10.3324	8.85542	34.7469	15.0304	21.0935	15.3505	2.15681	7.27051	11.4678	98.4095	54.9164	92.825	159.208	101.34	0.530481	3.35686	0.561666	2.29583
AAEL006549	4.60728	4.71139	4.65393	4.42521	4.59945	6.20757	5.16623	6.41519	5.37513	5.79103	11.2065	15.5371	13.9771	15.292	14.0032	9.81704	10.563	12.1331	8.78924	10.3256	6.48066	6.27391	6.92783	3.36887	5.76282	2.00461	3.83578	2.08065	0.949395	2.21761	1.2092	1.67389	1.07485	1.3423	1.32506	1.43989	2.30679	1.53503	1.13165	1.60334	3.9965	2.67483	3.88537	6.51951	4.26905	21.9136	14.042	22.4899	27.2848
AAEL018119	9.50105	12.7754	7.93225	8.33533	9.636	11.9832	7.77123	9.2553	8.42804	9.35944	19.2765	12.9239	18.5781	15.3513	16.5324	14.1958	10.4481	9.16976	9.08862	10.7256	13.6271	11.2483	10.6215	10.706	11.5507	12.0122	11.6077	9.73284	9.61539	10.742	12.294	11.0764	9.55045	9.69885	10.6549	15.1428	12.0772	13.2163	13.7313	13.5419	22.0176	19.4613	21.977	19.3219	20.6944	32.3523	22.7551	22.5305	20.2247
AAEL019934	0.245002	0.208055	0.217869	0.135103	0.201507	0.333682	0.0465	0.141311	0.17229	0.173446	0.151793	0.131401	0.078834	0.161099	0.130782	0.082855	0.12372	0	0.02098	0.0568888	0.106366	0.178951	0.039931	0.145806	0.117763	0.145119	0.243923	0.178234	0.154796	0.180518	0.175918	0.180051	0.152959	0.197388	0.176579	0.383039	0.094331	0.17402	0.196342	0.211933	0.555092	0.179017	0.205863	0.413633	0.338401	0.808813	0.337953	0.455443	0.299133
AAEL001241	0.55706	0.817344	0.43359	0.441072	0.562267	0.12097	0.132317	0.063879	0.208332	0.131375	0	0.215542	0.10837	0	0.080978	0.203645	0.165209	0.199476	0	0.142083	0.210543	0.353569	0.142422	0.24005	0.236646	0.079981	0.369117	0.040884	0.304234	0.198554	0	0.368305	0.194584	0.060759	0.155912	0.081811	0.064561	0.064927	0.096293	0.076898	0.527137	0.145462	0.618113	0.247271	0.384496	0.516087	0.432463	0.044782	0.507674
AAEL001232	2.70038	6.21531	1.96122	2.80859	3.42137	2.33395	4.34344	2.55791	3.72601	3.24033	6.42157	13.7079	10.0259	9.13742	9.82319	8.20943	10.2346	6.85355	6.68338	7.99523	4.37717	12.2712	5.95954	4.78754	6.84887	5.77967	8.98265	4.2664	4.66299	5.92293	3.39124	8.06057	3.8178	3.97003	4.80991	3.86856	7.73031	3.5046	4.25957	4.84076	5.96157	14.6752	5.83965	7.64731	8.53092	6.53934	12.0806	7.07197	8.26585
AAEL001244	10.5829	14.2044	7.85117	9.23408	10.4681	11.8766	10.2239	9.69063	9.57613	10.3418	6.68929	6.77439	6.44583	6.03554	6.48626	5.85824	5.36924	3.0835	3.90822	4.5548	5.95889	10.3261	5.58183	8.60209	7.61723	12.2865	16.8039	10.326	12.3184	12.9337	18.3033	18.1061	15.3144	15.4261	16.7875	17.3319	17.7577	15.0927	16.0867	16.5673	29.2117	28.3135	27.0979	26.8318	27.8637	41.0479	44.3355	32.8185	32.5672
AAEL019705	0.119912	0.173602	0	0.157834	0.112837	0.02327	0.038535	0.185339	0.177183	0.106082	0	0.05368	0	0	0.01342	0	0	0.017173	0	0.00429325	0.017918	0.016568	0.026136	0	0.0151555	0	0.026281	0.060224	0	0.0216262	0	0	0	0.063956	0.015989	0	0	0.054703	0	0.0136757	0.067799	0	0	0.043598	0.0278492	0	0.180974	0.066029	0
AAEL013571	137.619	200.448	133.22	150.078	155.341	166.413	165.547	163.41	152.815	162.046	158.331	153.089	147.606	162.704	155.433	164.458	120.369	132.361	150.998	142.046	144.189	138.521	140.155	118.033	135.224	142.376	143.741	153.442	159.122	149.67	230.662	195.632	194.345	201.075	205.428	273.322	195.375	243.067	257.269	242.258	352.567	249.44	350.038	418.16	342.551	380.394	356.136	387.588	301.109
AAEL027126	0.08271	0.080275	0.265533	0.068314	0.124208	0.184757	0.378833	0.275436	0.200966	0.259998	0.070973	0.097014	0.334097	0.210144	0.178057	0.147073	0.080393	0.013924	0.158232	0.0999055	0	0.469437	0.334675	0.090791	0.223726	0.172412	0.199735	0.173179	0.122067	0.166848	0.226121	0.240077	0.110316	0.12011	0.174156	0.324708	0.196518	0.365184	0.24357	0.282495	0.305737	0.569342	0.450391	0.350373	0.418961	0.240581	0.460934	0.419699	0.190328
AAEL021945	0	0	0.024655	0	0.00616375	0	0	0.077996	0	0.019499	0	0	0	0	0	0	0	0	0	0	0	0	0	0	0	0	0	0	0	0	0	0	0.037664	0	0.009416	0	0	0	0	0	0	0	0	0	0	0	0.032228	0	0
AAEL013267	83.9491	107.318	88.7658	95.9452	93.9946	79.6433	88.5204	73.7935	86.6471	82.1511	33.1125	35.8936	31.1078	31.3341	32.862	24.3104	26.33	20.2891	21.0111	22.9852	19.5003	30.8456	20.1966	24.4449	23.7469	21.4283	27.9985	20.9847	26.559	24.2427	29.4089	30.725	30.3808	33.0891	30.9009	45.0964	46.5789	39.2948	50.3127	45.3207	95.0718	73.7591	109.206	124.363	100.6	131.149	128.165	158.893	142.926
AAEL020445	0.242439	0.188673	0.248254	0.338689	0.254514	0.343654	0.173385	0.318402	0.299457	0.283724	0	0.130024	0.229295	0.117229	0.119137	0.037299	0	0.034805	0.034589	0.0266732	0	0.01983	0.039972	0.029129	0.0222327	0.039655	0.046529	0.041229	0.097416	0.0562073	0.050335	0.045391	0.086775	0.074293	0.0641985	0.109541	0.033968	0.157144	0.077027	0.09442	0.296009	0.145953	0.267417	0.236222	0.2364	0.184242	0.071667	0.282099	0.166806
AAEL018699	24.9461	27.3713	19.7667	23.1859	23.8175	22.7466	26.1055	28.4922	19.6501	24.2486	8.43796	10.3565	10.742	8.42541	9.49045	8.25774	5.59921	4.45976	4.35287	5.66739	7.54504	12.1519	6.07121	5.65828	7.85662	11.5819	16.8564	10.7743	11.1882	12.6002	22.9099	18.4462	16.784	17.5951	18.9338	27.6821	26.8592	28.1569	28.2792	27.7444	62.3571	46.3702	62.5741	58.7162	57.5044	83.6143	68.3255	53.8467	54.8257
AAEL020827	0.744236	0.713269	0.802511	0.757979	0.754499	0.63809	0.680991	0.635202	0.636372	0.647664	0.454051	0.760763	0.324895	0.36746	0.476792	0.469781	0.473541	0.413354	0.231194	0.396967	0.537	0.845565	0.442292	0.405873	0.557682	0.254565	0.787659	0.406247	0.407598	0.464017	0.708085	0.797565	0.664846	0.745635	0.729033	0.652822	0.678216	0.769079	0.911923	0.75301	2.1025	1.56426	2.29499	2.99294	2.23867	3.13378	2.55271	2.14068	2.13577
AAEL022320	0.672755	1.0368	0.585823	0.722314	0.754422	0.86434	0.576648	0.660782	0.549454	0.662806	0.329801	0.423958	0.431439	0.445581	0.407695	0.356362	0.451167	0.209983	0.392225	0.352434	0.284714	0.516143	0.36394	0.379153	0.385987	0.297932	0.987533	0.420262	0.379205	0.521233	0.707747	0.588591	0.443179	0.583287	0.580701	0.68867	1.0072	0.917946	1.1431	0.93923	2.39698	1.37261	2.40119	3.39987	2.39266	2.97052	2.66152	2.31361	2.32461
AAEL011050	24.1078	31.9347	25.9142	29.6673	27.906	31.9388	33.1788	29.7648	27.3441	30.5566	15.3243	16.0882	15.3805	14.7934	15.3966	10.8621	12.0552	14.9597	11.8503	12.4318	12.3718	15.2934	12.111	12.2349	13.0028	12.6373	13.918	14.2497	13.7187	13.6309	15.629	16.1605	15.6195	14.4466	15.4639	17.0118	17.3848	16.128	18.8946	17.3548	28.1886	21.1436	31.1663	28.4893	27.247	55.9294	40.0832	49.2225	40.8392
AAEL011048	6.46032	7.77083	6.54821	6.17179	6.73779	8.0429	7.4755	6.59848	6.80471	7.2304	6.30434	5.02297	5.98514	5.81704	5.78237	8.81187	7.90029	7.28298	9.24823	8.31084	10.3419	10.3017	11.3128	11.7462	10.9257	9.19117	9.47527	9.04868	7.53158	8.81168	5.52328	6.36884	3.82438	4.233	4.98737	4.39187	5.12684	4.42793	5.24678	4.79836	8.13507	6.67126	9.64709	9.01076	8.36604	17.4319	14.0128	15.6841	17.8701
AAEL027426	0.839819	1.74781	0.725424	0.99307	1.07653	1.3663	1.12651	0.857696	0.978692	1.0823	1.2219	0.843006	0.450187	0.892881	0.851994	1.45022	0.820712	1.6564	2.05026	1.4944	1.34229	0.726828	0.900417	0.981528	0.987766	0.58539	0.76095	1.41065	1.21653	0.993382	1.16639	1.89848	1.39732	0.685701	1.28697	1.81698	0.56112	1.57811	1.07416	1.25759	2.18667	2.05663	1.85862	2.62546	2.18184	3.06768	2.59609	2.46402	2.10097
AAEL011054	2.27809	2.31832	2.48206	1.03746	2.02898	3.15162	1.88512	1.5462	2.66955	2.31312	3.04368	4.06907	2.16981	2.85435	3.03423	3.70019	3.39303	3.77743	2.25499	3.28141	3.10277	4.68856	2.284	3.47904	3.3886	3.25887	2.90557	1.39561	2.66031	2.55509	2.97228	3.79768	3.37454	1.84646	2.99774	3.67729	4.7715	2.5322	3.13028	3.52782	3.7396	4.15324	4.97037	7.52831	5.09788	9.88731	6.31226	6.43863	6.0266
AAEL011052	2.70156	4.04477	3.15483	2.64415	3.13632	3.49779	3.04143	4.10792	2.55415	3.30033	5.58017	5.11556	5.29324	6.07074	5.51493	5.46074	5.59403	5.91266	4.86938	5.4592	4.02467	4.84669	4.49615	2.47105	3.95964	1.62551	2.99132	2.2979	2.11397	2.25718	1.42628	1.64913	1.58045	1.55878	1.55366	1.584	2.87451	1.18271	1.53825	1.79487	2.68451	2.23795	3.03034	3.8523	2.95128	9.34436	8.58102	9.53082	13.1205
AAEL011049	1.12211	1.25185	0.677496	0.996143	1.0119	1.25405	1.13146	0.56726	0.805866	0.939661	0.628464	0.669384	0.582249	0.802256	0.670588	0.968718	0.521033	0.263647	0.426473	0.544968	0.839731	0.816491	0.500561	0.524578	0.67034	0.756974	1.08049	0.706377	0.641224	0.796265	1.27391	1.15921	0.999861	0.946435	1.09486	1.27574	0.635368	0.615874	0.746228	0.818301	1.69102	1.03818	1.35591	1.47477	1.38997	2.87196	2.84161	2.49321	2.89966
AAEL011051	36.8738	41.5083	30.7802	33.2427	35.6012	36.9573	31.6527	35.7066	35.1166	34.8583	20.6522	21.1156	18.843	22.1202	20.6828	19.7428	15.9394	12.0105	14.0504	15.4358	15.6808	21.0094	15.1074	17.0363	17.2085	30.3653	30.8258	28.8899	25.9664	29.0119	40.8596	42.1461	35.4603	35.2975	38.4409	40.804	35.7429	32.8264	34.6479	36.0053	67.9201	48.781	63.758	66.9098	61.8422	74.8111	63.3518	62.8581	61.3696
AAEL021818	0.085407	0.030066	0.01215	0.011316	0.0347348	0.050994	0	0.033679	0.103286	0.0469897	0	0	0.01187	0	0.0029675	0	0	0	0	0	0	0	0	0.040485	0.0101213	0	0.018713	0	0.056041	0.0186885	0.041322	0.041242	0	0	0.020641	0	0	0	0.069972	0.017493	0.065488	0	0.089727	0.018494	0.0434273	0.109738	0	0.067849	0
AAEL011057	3.28801	5.15266	3.73979	2.9489	3.78234	3.13521	3.9439	3.28058	3.50752	3.4668	3.64144	3.81321	4.4173	2.93569	3.70191	2.81611	3.05674	3.99842	2.11769	2.99724	1.95568	3.24346	1.94626	2.26664	2.35301	2.87223	2.39319	2.39204	2.28138	2.48471	1.81579	3.82581	1.89886	1.92746	2.36698	1.86558	2.65388	2.42849	2.4121	2.34002	3.97991	3.37492	3.29897	5.52609	4.04497	5.84981	6.70947	8.76901	7.85761
AAEL011055	42.3209	43.7589	43.8242	42.3628	43.0667	43.334	44.1895	37.4445	41.7405	41.6771	20.7463	24.6166	28.3752	20.7496	23.6219	21.4506	18.4406	19.6162	19.0892	19.6491	17.6475	25.8004	21.5409	19.2514	21.0601	16.0766	24.2081	14.682	17.3609	18.0819	13.6094	17.0862	12.7216	14.4844	14.4754	14.3009	16.4618	14.0423	15.3773	15.0456	28.0802	23.9937	33.9922	30.9955	29.2654	73.4391	56.7936	64.2476	70.1275
AAEL025376	1.02544	1.17332	0.909343	0.778546	0.971661	0.704303	0.927785	0.499123	0.615675	0.686721	0.833453	0.831964	0.702317	0.72303	0.772691	0.555033	0.667267	0.652083	0.578276	0.613165	0.473275	0.347249	1.24297	0.813028	0.719131	0.945281	0.964568	0.471657	0.757871	0.784844	1.0825	0.888627	0.815663	1.03732	0.956028	1.5539	1.32606	1.19388	0.986155	1.265	1.9894	2.27406	2.28066	2.16422	2.17709	3.90421	2.65115	3.19714	2.56977
AAEL011053	0.496496	0.665972	0.427063	0.543253	0.533196	0.78456	0.350276	0.192689	0.597435	0.48124	0.753611	0.937988	0.542615	0.761726	0.748985	0.604869	0.73224	1.22988	0.305821	0.718203	0.947861	0.51535	0.564555	0.611815	0.659895	0.961148	0.909818	0.930206	1.15627	0.989359	0.822079	0.598342	0.592526	0.592842	0.651447	0.787938	0.610025	0.570761	0.89229	0.715253	0.811061	1.2515	1.3396	1.12433	1.13162	2.19516	2.04467	1.94324	1.53627
AAEL005316	0	0.564018	0.180196	0.26952	0.253433	0.403003	0.202787	0.075041	0.810845	0.372919	0.27091	0.280397	0.110196	0.37757	0.259768	0.481376	0.663313	0.767979	0.579371	0.62301	0.510911	0.772685	0.637278	0.960276	0.720287	0.689849	0.719464	0.872168	0	0.57037	0.458285	0.522787	0.338985	0.517645	0.459425	0.489002	0.279589	0.562328	0.329264	0.415046	0.488516	0.334537	1.42991	0.39442	0.661847	0.91876	1.06397	1.66509	0.840139
AAEL027634	0	0	0	0	0	0	0	0	0.212281	0.0530702	0	0	0	0	0	0	0	0	0	0	0	0.197143	0	0	0.0492858	0.103841	0	0	0	0.0259603	0	0	0.588352	0	0.147088	0.211722	0	0	0	0.0529305	0.362925	0.47992	0.45944	0.427674	0.43249	0.873159	0	0.907911	0
AAEL020452	2.98793	3.76994	4.62318	4.67404	4.01377	2.87736	3.41752	3.31448	3.81498	3.35609	2.06825	2.17124	3.16247	3.30322	2.6763	2.5066	1.97585	2.45801	2.40045	2.33523	2.10576	2.16689	2.42908	2.73126	2.35825	1.47242	1.63175	2.07201	2.10346	1.81991	1.85806	2.15772	1.64021	3.05972	2.17893	3.45436	2.57288	4.41609	5.86891	4.07806	5.58213	4.39532	6.75039	11.4509	7.04469	10.7348	8.78233	8.65631	6.72336
AAEL024193	0.667276	0.06788	0.577354	0.489675	0.450546	0.554816	0.209832	0	0	0.191162	0	0.77101	0.284069	0.783545	0.459656	0.162171	0	0	0.657592	0.204941	0.386678	0	0.156098	0.334494	0.219317	0.145254	0	0	0	0.0363135	0.311938	0	0	0	0.0779845	0.593595	0	0.14676	0.449642	0.297499	0.513703	0.311931	0.250179	0	0.268953	0.577546	0	0.393774	0.912992
AAEL026594	0	0.354541	0.279569	0.692817	0.331732	0.520112	0.743432	0.441412	0.539622	0.561144	0.469161	0.23812	0	0	0.17682	0.455079	0.240629	0.551462	0.231474	0.369661	0.451584	0.12106	0	0.082662	0.163827	0.676492	0.051284	0.165656	0.591746	0.371294	0	0.464292	0	0.533272	0.249391	0.638002	0	0.469676	0	0.276919	0	0.406053	0.262149	0.776709	0.361228	0	0.905908	0.224144	0.419595
AAEL022962	0.540504	0.664694	0.260521	1.17665	0.660591	0.165857	0.406018	0.527675	0.55855	0.414525	0.531603	0	0.316017	1.18754	0.50879	0.670029	0.182778	0.061494	0.597766	0.378017	0.266951	1.4344	0.149747	0.244693	0.523949	0.571917	0.314842	0	0.128496	0.253814	0.171037	0.144477	0	1.21221	0.381931	0	0.325384	0.148896	0.965125	0.359851	0	0.910982	0.483922	2.65004	1.01124	0.196783	0.681419	0.300274	0.490799
AAEL019618	1.31783	1.48828	1.54178	2.8436	1.79787	1.96252	1.23285	1.87569	2.30528	1.84409	1.88854	1.4022	2.31665	1.45553	1.76573	1.98992	1.0309	0.67662	1.72089	1.35458	0.987123	1.15517	1.03712	1.12153	1.07524	1.24265	0.735872	0.704434	0.731554	0.853628	0.569053	0.738911	0.470352	0.697109	0.618856	0.54111	0.50326	0.65529	0.934359	0.658505	1.21495	1.0436	1.07997	2.09343	1.35799	4.39073	3.05719	1.54743	2.42882
AAEL019451	1.00415	0.659591	0.686896	0.971989	0.830657	0.60811	0.61854	0.504785	0.587699	0.579784	0.594129	0.52338	0.58144	0.595669	0.573654	0.519329	0.484675	0.332748	0.461361	0.449528	0.540763	0.68424	0.75954	0.638888	0.655858	0.690974	0.652902	0.873512	0.719052	0.73411	0.84249	0.682093	0.532202	0.974221	0.757752	0.776667	0.471691	0.749666	1.18684	0.796216	2.10132	1.2438	1.37768	2.39901	1.78045	1.86955	2.12002	1.71088	1.76422
AAEL018703	0.302437	0.407065	0.439324	0.388096	0.38423	0.431317	0.268563	0.36411	0.309739	0.343432	0.152907	0.139336	0.192356	0.126524	0.152781	0.177815	0.078909	0.103852	0.141192	0.125442	0.106324	0.221569	0.220442	0.237534	0.196467	0.26192	0.181282	0.404842	0.247263	0.273827	0.366628	0.385067	0.212329	0.391795	0.338955	0.255751	0.24221	0.250946	0.513059	0.315491	0.868972	0.610578	0.710673	0.873789	0.766003	0.850168	0.766952	0.949388	0.812973
AAEL005329	10.2701	10.8513	12.6097	12.1882	11.4798	11.1847	11.4943	8.42412	10.2852	10.3471	2.19735	2.85201	2.05415	3.42069	2.63105	6.566	6.95062	4.08751	6.37324	5.99434	7.46742	5.68981	9.87145	10.7696	8.44958	11.7743	9.64622	11.3672	14.6748	11.8656	27.6647	18.5092	24.479	28.6651	24.8295	36.5429	18.271	34.8967	39.6205	32.3328	33.7728	28.3317	30.5833	29.1652	30.4633	20.5967	18.6809	22.1214	16.5294
AAEL005312	1.86852	1.51795	1.72867	1.37104	1.62155	0.99982	0.776616	0.766692	1.31488	0.964502	0.331152	0.555776	0.888185	0.325302	0.525104	0.460628	0.949706	0.462299	0.532007	0.60116	0.084313	0.583706	0.592197	0.398849	0.414766	1.18721	0.349888	0.926497	0.737295	0.800223	1.13708	1.49425	0.635253	0.906584	1.04329	1.56262	1.18714	1.22329	2.3992	1.59307	4.55603	2.89079	4.19853	4.32455	3.99248	5.71158	3.13866	4.09485	3.18477
AAEL005326	0.572736	0.68441	0.605509	0.393004	0.563915	0.889257	0.578599	0.594814	0.736511	0.699795	0.983614	1.03664	0.823212	1.58666	1.10753	1.10574	1.02478	0.621573	1.00056	0.938162	0.661138	1.24819	0.750446	0.397364	0.764285	0.804369	0.773589	1.50126	0.407105	0.87158	0.350044	0.787423	0.695175	0.722831	0.638868	0.788867	0.734452	1.05877	0.758468	0.83514	1.18824	1.73593	1.83816	1.2429	1.50131	1.96005	2.07621	1.86841	1.94157
AAEL020936	9.84633	11.1507	4.96369	3.82849	7.44731	12.5336	5.21075	5.55019	3.05792	6.58812	13.8301	9.50541	7.3476	9.69192	10.0937	39.7068	31.0448	21.0957	29.7005	30.387	55.434	66.2398	60.0795	73.2404	63.7484	75.2414	69.8108	70.1923	79.9911	73.8089	67.4221	74.9166	59.0367	47.6982	62.2684	12.6043	31.3252	25.1695	9.03058	19.5324	10.0678	13.7236	10.7224	10.281	11.1987	10.4774	10.0616	12.0496	8.29524
AAEL024460	0	0.424743	0	0.086925	0.127917	0.238356	0	0	0	0.059589	0	0.206981	0	0	0.0517452	0	0.412491	0	0.167153	0.144911	0	0.379424	0	0.103559	0.120746	0.099993	0.340156	0.102571	0.469176	0.252974	0.677752	0.333938	0.190929	1.18372	0.596584	0.385114	0.660274	0.051797	0	0.274296	0.354047	0.556749	0.462023	0.913975	0.571698	0.64345	0.137954	0	0.268784
AAEL024562	0.193709	1.00014	0.203708	0.264046	0.415401	0.4546	0.291926	0.580257	0.22105	0.386958	0	0.134574	0.066572	0.079793	0.0702347	0.378956	0.294765	0.242898	0.050317	0.241734	0.286735	0.903033	0.163523	0.02339	0.34417	0.264868	0.588903	0.37005	0.185756	0.352394	0.359303	0.589093	0.796324	0.652519	0.59931	0.698394	0.87641	0.625215	0.64232	0.710585	0.691129	0.911577	0.670313	1.06556	0.834645	1.94251	2.7771	2.01837	0.888443
AAEL021795	186.324	224.855	146.993	187.485	186.414	341.869	276.815	342.868	324.312	321.466	136.776	278.799	332.792	208.016	239.096	271.577	200.258	116.816	123.631	178.07	79.275	267.483	185.017	94.3495	156.531	592.609	672.385	679.99	776.789	680.443	255.372	521.501	347.783	250.553	343.802	147.528	440.768	204.934	140.846	233.519	171.639	263.727	140.476	310.854	221.674	181.843	532.802	248.028	539.053
AAEL026008	150.687	320.478	118.477	139.762	182.351	623.385	504.595	469.467	520.281	529.432	89.228	139.24	109.974	121.684	115.032	282.651	212.082	130.794	188.601	203.532	157.897	398.82	282.994	234.111	268.456	556.524	747.736	674.122	625.32	650.925	387.355	630.221	417.17	392.519	456.816	304.788	691.649	654.328	302.744	488.377	282.064	518.888	261.456	365.984	357.098	578.165	845.626	468.82	670.686
AAEL026833	43.0622	94.8209	42.1312	52.1116	58.0314	138.587	104.538	54.0823	104.4	100.402	14.6572	25.2501	15.3259	16.8369	18.0175	56.8936	47.0786	20.6557	25.6373	37.5663	26.1986	77.2369	36.832	41.2235	45.3727	96.0688	109.494	125.819	133.519	116.225	104.924	125.032	98.3864	84.2115	103.138	85.8338	148.476	148.603	84.1715	116.771	98.9047	146.418	93.6138	125.977	116.228	153.325	234.925	154.009	254.568
AAEL022334	193.464	562.274	202.14	297.219	313.774	484.041	395.575	277.976	386.377	385.992	208.449	289.64	157.802	244.205	225.024	284.898	213.082	191.789	184.112	218.47	225.071	547.025	174.329	154.111	275.134	325.183	481.57	365.46	368.28	385.123	621.442	1068.1	868.69	572.267	782.624	882.3	1951.96	848.196	589.517	1067.99	779.635	2296.35	862.193	1090.76	1257.23	434.044	1906.1	551.159	1909.01
AAEL005315	30.2658	38.5969	30.913	35.4985	33.8185	36.7082	36.4414	39.1714	43.4972	38.9545	7.24971	8.89284	7.10531	7.61387	7.71543	15.8672	14.5413	9.95329	12.2516	13.1534	20.2618	23.4495	19.6596	22.4974	21.4671	23.0173	26.5512	28.8944	23.0727	25.3839	22.4529	25.9078	23.7656	20.5794	23.1764	19.2553	25.0744	23.0949	18.1484	21.3932	30.9608	33.6149	32.145	28.2396	31.2401	47.6101	54.0671	49.7382	51.8545
AAEL028119	0.958486	1.22703	0.793196	1.27454	1.06331	0.881774	0.817776	0.754757	0.66322	0.779382	0.961343	0.824376	0.783823	0.606272	0.793953	0.673442	0.571151	0.568855	0.764756	0.644551	0.40883	0.572537	0.574079	0.515101	0.517637	1.41303	1.08615	0.93174	1.31579	1.18668	1.45358	1.3657	1.13008	1.35163	1.32525	1.21074	1.19156	1.24236	1.33963	1.24607	3.11246	2.63699	3.65796	3.50166	3.22727	4.3879	4.03727	3.39214	3.84144
AAEL013942	5.05564	4.58544	3.47489	4.67639	4.44809	4.64283	3.90903	3.40187	4.12657	4.02007	4.44585	4.02785	4.8909	3.56128	4.23147	5.52829	5.29718	7.26543	6.34495	6.10896	8.58573	7.85451	11.1414	11.396	9.7444	9.65822	8.96179	11.4224	9.99289	10.0088	9.97513	9.07121	12.7421	11.9276	10.929	9.9424	9.1451	10.5672	11.0726	10.1818	12.3654	8.60054	11.9993	14.3844	11.8374	10.4436	8.52042	10.8337	9.37475
AAEL013940	0.218322	0.720781	0.151295	0.14205	0.308112	0.346423	0.390743	0.295022	0.150174	0.29559	0.476005	0.720841	0.238357	0.265674	0.425219	0.726677	0.617962	0.256591	0.574714	0.543986	0.779602	1.46503	0.457926	0.459551	0.790527	0.524719	1.33841	0.733338	0.87832	0.868697	0.418473	0.94298	0.428101	0.537449	0.581751	0.672287	1.15769	0.456199	0.324138	0.652578	0.362569	1.42161	0.603239	0.440522	0.706985	1.57241	2.74165	1.14236	1.00264
AAEL014549	13.0786	18.4088	14.0183	13.5877	14.7733	16.5966	16.766	18.4942	16.6757	17.1331	18.1225	22.1396	20.1775	16.5438	19.2459	16.9828	14.4481	15.8895	13.1388	15.1148	15.7089	18.5035	17.4514	16.0768	16.9352	21.0451	21.9326	23.5779	20.3764	21.733	23.354	27.8878	23.0005	28.3787	25.6553	28.1807	27.3171	25.3835	26.5159	26.8493	41.7577	38.7633	44.9881	52.0365	44.3864	65.7003	68.2116	54.2722	46.3931
AAEL025567	105.016	110.84	107.002	110.575	108.358	106.28	114.565	113.135	102.644	109.156	101.11	109.526	106.299	113.888	107.706	110.531	115.823	112.369	104.664	110.847	112.379	110.759	121.339	124.925	117.35	83.6838	97.6022	79.6266	77.373	84.5714	53.1612	72.6261	52.5647	50.4563	57.2021	50.4962	69.4421	49.4769	41.0281	52.6108	54.4911	59.5078	63.145	53.6159	57.6899	91.0312	91.5212	91.2048	69.2583
AAEL014546	2.83417	4.49896	2.78164	4.0432	3.5395	4.35159	2.84249	4.88717	2.94028	3.75538	4.10825	4.91446	3.27238	5.18121	4.36907	5.33207	4.97415	4.98578	6.02813	5.33003	7.1092	6.22239	6.07448	5.7961	6.30054	4.6885	4.42328	4.12517	3.59818	4.20878	2.88367	4.60979	3.58867	4.61565	3.92444	2.89024	3.49804	3.86543	3.02671	3.3201	5.68746	4.29601	5.50339	5.01617	5.12576	8.70245	8.47867	8.42432	9.35492
AAEL021473	27.5485	33.8412	26.9973	29.2618	29.4122	29.0661	27.8869	29.3253	30.3664	29.1612	35.9665	44.0415	39.7831	47.9828	41.9435	33.5195	32.3933	34.529	27.7776	32.0549	20.0253	34.8887	23.2848	13.0425	22.8103	11.0304	32.6779	10.2049	9.10955	15.7557	12.0689	18.3915	10.8603	11.7475	13.267	12.9092	19.1635	12.6771	13.0804	14.4575	23.5908	29.6419	29.6189	32.0684	28.73	77.5803	82.9206	79.4641	95.2184
AAEL014550	0.021455	0.075844	0	0.020181	0.02937	0.011555	0	0	0	0.00288875	0	0	0	0	0	0	0	0	0	0	0	0	0	0	0	0	0	0	0.023314	0.0058285	0	0	0	0	0	0	0	0	0	0	0	0	0	0	0	0	0	0	0
AAEL005874	26.5692	35.6807	23.7269	23.6311	27.402	33.8854	26.1565	24.236	25.7892	27.5168	9.07403	11.7384	7.42777	10.4616	9.67545	8.3111	6.42767	6.70547	6.35167	6.94898	7.13905	17.8096	7.0933	8.29817	10.085	15.8146	25.0087	15.727	24.6873	20.3094	28.876	32.4615	30.4605	28.3829	30.0452	27.2318	34.024	24.1462	26.2769	27.9197	35.5418	40.3482	32.7042	41.382	37.4941	41.4941	46.8929	39.6337	40.9615
AAEL024796	5.65917	7.15885	5.42497	6.66889	6.22797	6.86796	5.18847	6.19991	4.9845	5.81021	2.77539	3.03964	3.00661	4.01491	3.20914	5.55021	5.47989	3.36933	4.42798	4.70685	4.28815	6.126	5.14714	4.00565	4.89174	4.17654	7.62834	3.8408	3.89064	4.88408	7.12564	6.99131	5.31752	6.25964	6.42353	7.24757	7.18554	5.67431	6.02602	6.53336	9.58122	15.6829	8.33314	11.0361	11.1584	10.2799	20.2324	8.81252	14.0586
AAEL027832	5.30694	4.10066	3.81614	4.97836	4.55053	4.97457	4.17668	4.128	4.57659	4.46396	2.90817	2.77037	2.32039	2.75546	2.68859	4.92912	5.3826	1.5321	2.66022	3.62601	3.87576	4.71378	3.70052	3.01793	3.827	3.25794	6.12547	2.22131	2.5939	3.54965	5.92972	4.24076	3.66803	4.97217	4.70267	5.42015	3.27014	4.7649	4.34859	4.45094	7.09437	6.61634	6.30326	7.08079	6.77369	7.13044	10.1419	6.52132	9.96371
AAEL027728	3.3217	1.54224	0.922285	2.55976	2.08649	1.79515	1.18642	2.7023	2.33316	2.00426	0.668561	1.09961	0.929493	0.581988	0.819913	1.3883	2.79411	1.23226	1.42965	1.71108	3.28188	3.06988	2.60979	0.869672	2.4578	1.78528	3.5395	1.13508	0.798791	1.81466	1.56932	2.94763	2.43566	1.82579	2.1946	1.44668	2.59969	2.13857	1.84389	2.00721	2.36519	5.07624	1.22771	1.72619	2.59883	3.84215	2.93723	2.8125	2.11881
AAEL023898	0.98151	0.340041	1.20356	1.47064	0.998938	2.0294	1.32317	0.949585	0.535128	1.20932	0.374731	0.111698	0.244031	0.744021	0.36862	2.08096	0.650644	0.027021	0.622763	0.845347	0.724767	1.17565	0.18996	1.20293	0.823326	0.168647	0.959286	0.235085	1.10896	0.617994	1.6506	0.796109	0.828051	1.46973	1.18612	1.50246	0.068129	0.553392	0.497792	0.655443	2.35168	1.50433	0.978001	1.74595	1.64499	0.770914	3.14404	0.820392	2.44117
AAEL027381	0.238773	0.383462	0.169426	0.122461	0.22853	0.144019	0.201159	0.152957	0.266721	0.191214	0.095023	0.094079	0.129541	0.058392	0.0942588	0.150618	0.282672	0.070219	0.128225	0.157934	0.194825	0.19242	0.133802	0.082113	0.15079	0.08442	0.201774	0.202824	0.116124	0.151285	0.198752	0.082961	0.090079	0.141986	0.128444	0.11206	0.136612	0.092316	0.120424	0.115353	0.119362	0.114769	0.043254	0.128893	0.101569	0.41376	0.232467	0.289211	0.177194
AAEL019742	3.01333	2.98848	2.30565	2.7346	2.76052	3.76002	3.79411	5.19278	4.26256	4.25237	7.49205	5.8991	7.34537	5.46877	6.55132	8.2704	6.40201	2.832	5.67302	5.79436	3.70987	5.33906	3.68482	3.52743	4.0653	2.63626	3.21355	2.4939	2.3882	2.68298	2.4366	2.58587	1.47145	1.62693	2.03021	2.16026	1.65602	1.75942	2.30507	1.97019	3.67004	2.96803	2.68756	3.13152	3.11429	5.06282	5.52019	3.75385	5.08873
AAEL026695	7.90422	8.07144	6.37658	4.22801	6.64506	5.24539	6.87245	3.22405	8.676	6.00447	5.76036	8.82788	3.41072	7.41027	6.35231	2.77934	4.61404	4.88877	3.64904	3.9828	5.17144	4.58901	5.68121	4.92431	5.09149	4.17251	3.01325	2.67918	0.921966	2.69673	3.5156	5.40493	2.66169	2.16002	3.43556	2.44438	4.16354	2.72515	3.02134	3.0886	2.82007	8.20171	6.87742	3.12418	5.25584	9.98152	10.1664	14.8663	7.19027
AAEL005884	10.5351	9.08991	9.49737	9.77701	9.72483	8.79161	9.88849	8.66588	9.9993	9.33632	6.99582	9.21139	6.97667	9.81644	8.25008	10.7192	13.2047	13.9542	11.319	12.2993	13.397	13.3405	14.7552	10.9798	13.1181	17.9884	18.1329	20.304	17.7939	18.5548	11.4061	14.1116	13.7013	12.404	12.9057	14.6979	11.4408	12.2393	15.3814	13.4398	12.1733	10.4432	13.095	11.4653	11.7942	8.88375	12.8618	11.7665	10.4908
AAEL005890	17.4647	17.8785	12.8393	14.3242	15.6267	16.1453	14.6639	13.6156	14.9972	14.8555	5.43987	8.91008	7.56085	7.34217	7.31324	7.31762	7.33802	7.04997	5.49403	6.79991	7.33052	6.90813	8.71243	7.54954	7.62515	6.8864	9.08278	11.3872	9.69434	9.26268	5.88582	9.27869	6.85137	4.86435	6.72006	4.84536	8.25854	4.40672	3.70318	5.30345	5.47691	6.06165	7.00419	6.59987	6.28566	10.5369	10.7999	14.0876	14.7263
AAEL005888	0.13486	0.182076	0.250566	0.262137	0.20741	0.149877	0.090014	0.13653	0.262607	0.159757	0.064617	0.152073	0.032375	0.060044	0.0772772	0.044008	0.01253	0.042403	0.035434	0.0335937	0.089908	0.076153	0.024944	0.033847	0.056213	0.134943	0.146781	0.080071	0.136884	0.12467	0.222559	0.169991	0.149738	0.222492	0.191195	0.092301	0.17739	0.141119	0.204834	0.153911	0.172165	0.216467	0.281554	0.286687	0.239218	0.34534	0.392808	0.305885	0.320052
AAEL017042	17.1622	25.3028	15.99	19.0932	19.3871	20.7778	19.1908	15.6412	17.5748	18.2961	11.629	9.70531	8.72531	9.21022	9.81746	11.4917	10.9893	9.34077	11.5084	10.8325	10.442	15.2554	9.61478	13.8703	12.2956	32.5095	31.2211	26.647	32.5556	30.7333	49.7775	50.9377	52.4256	52.6071	51.437	61.8584	56.7166	54.8879	62.3269	58.9475	73.6046	70.5134	74.5337	71.9012	72.6382	59.611	69.8834	62.6611	52.2098
AAEL005879	42.879	61.2223	42.5184	38.0794	46.1748	63.002	52.7093	45.6166	43.1554	51.1208	45.5452	42.2173	42.6081	39.4613	42.458	28.4752	20.1047	16.3216	15.1644	20.0165	16.0987	33.1033	15.7205	14.5451	19.8669	26.4549	33.3701	20.0865	23.6315	25.8857	45.362	43.8847	43.0931	39.2949	42.9087	47.914	51.6625	45.2678	40.6848	46.3823	77.0494	83.1345	76.0848	88.4122	81.1702	172.035	131.111	134.962	132.421
AAEL005882	11.6404	13.7841	8.7673	8.83738	10.7573	16.0745	10.2537	12.1158	12.0687	12.6282	13.2905	10.0679	10.8172	9.98472	11.0401	11.4237	10.7183	9.12492	9.94549	10.3031	11.2988	13.624	12.6983	13.7722	12.8483	22.4999	21.4522	21.5425	20.4792	21.4934	22.4494	19.7848	19.7807	19.1429	20.2895	18.0023	15.7812	18.3778	18.6189	17.6951	24.8044	21.4789	23.9781	28.7254	24.7467	37.4238	35.8527	33.7711	32.8404
AAEL023543	20.6878	25.297	15.7912	15.7086	19.3712	25.0309	21.386	25.0448	24.5363	23.9995	20.4452	16.7321	16.5846	19.5641	18.3315	17.6214	17.4945	17.2013	14.4792	16.6991	20.1783	23.1426	21.1182	23.7532	22.0481	31.0375	33.4363	34.7017	34.4897	33.4163	32.5702	31.3726	29.5312	34.5653	32.0098	28.8325	33.2812	29.3867	29.9361	30.3591	46.4058	39.2904	43.7561	45.4292	43.7204	60.6637	61.8609	50.0105	50.9436
AAEL024750	0.059843	0	0	0	0.0149607	0	0	0	0	0	0	0	0	0	0	0	0	0	0	0	0	0	0	0	0	0	0	0	0	0	0	0	0	0	0	0	0	0	0	0	0	0	0	0	0	0	0	0	0
AAEL019757	0	0.029562	0.084713	0	0.0285688	0	0.056811	0	0.017695	0.0186265	0.026423	0	0	0.033017	0.01486	0.018408	0	0	0	0.004602	0	0.018747	0	0	0.00468675	0.019803	0.085368	0.039884	0	0.0362637	0.073614	0	0.015952	0.015106	0.026168	0	0	0.075204	0.046481	0.0304212	0.151601	0.135431	0.194065	0.190127	0.167806	0.215528	0	0.471643	0.021784
AAEL008292	0.07724	0.073332	0.110696	0.268485	0.132438	0.129203	0.212185	0.040266	0.149348	0.13275	0.024865	0.033231	0.071951	0	0.0325117	0.108934	0.081819	0.178432	0.030675	0.099965	0.086593	0.023097	0.072871	0	0.0456402	0.105683	0.33981	0.090118	0.253585	0.197299	0.306339	0.347254	0.260351	0.201068	0.278753	0.383956	0.073392	0.361941	0.280054	0.274836	1.02703	0.350832	0.851511	0.744396	0.743443	1.50865	1.62785	1.28498	0.540428
AAEL020419	0	0	0	0	0	0	0	0	0	0	0	0	0	0	0	0	0	0	0	0	0	0	0	0	0	0	0	0	0	0	0	0.03267	0	0.063194	0.023966	0	0	0.033624	0	0.008406	0	0	0.046214	0	0.0115535	0	0	0	0
AAEL008291	32.8885	48.5214	31.5857	29.1409	35.5341	43.201	37.4449	38.0505	37.7453	39.1104	68.5997	70.8949	63.987	72.8807	69.0906	102.585	104.894	94.3873	98.5865	100.113	125.147	133.9	130.903	138.544	132.123	93.0172	104.694	100.97	77.9653	94.1617	65.4063	80.0085	68.5616	75.7659	72.4356	69.7774	90.9991	67.0887	56.2775	71.0357	88.1847	87.3992	85.4287	114.452	93.8662	108.237	117.81	95.6376	123.858
AAEL008289	1.55496	1.97036	1.31973	1.34088	1.54648	0.576832	0.501245	0.336095	0.141538	0.388927	0.48021	0.303346	0.397161	0	0.295179	0.355702	0	0.416252	0.651804	0.35594	0.179222	0.276198	1.01414	0.43835	0.476976	0.446351	1.63973	0.482936	0.371539	0.73514	0.8188	1.16707	0.449331	0.662417	0.774403	0.460973	0.985479	0.866941	0.754205	0.766899	1.98651	4.24383	2.26358	2.9894	2.87083	1.80777	2.65279	1.51733	3.27664
AAEL008285	0.076966	0	0	0.10055	0.044379	0	0	0	0.104409	0.0261022	0.085777	0	0	0	0.0214442	0	0	0	0	0	0	0	0.081841	0	0.0204602	0	0	0	0	0	0	0	0	0	0	0	0	0	0.125259	0.0313147	0	0	0	0	0	0	0	0	0
AAEL014520	0.050833	0	0	0.093369	0.0360505	0.014885	0	0	0	0.00372125	0	0	0	0	0	0	0	0	0	0	0	0	0	0	0	0	0	0.022035	0	0.00550875	0	0	0	0	0	0.02212	0	0	0	0.00553	0.019419	0	0	0	0.00485475	0	0	0	0
AAEL026277	0	0	0	0	0	0	0	0	0	0	0	0	0	0	0	0	0	0	0	0	0	0	0	0	0	0	0	0	0	0	0	0	0	0	0	0	0	0	0	0	0	0	0	0	0	0	0	0	0
AAEL014519	1.70517	1.44155	1.79139	1.9088	1.71173	1.76116	1.64573	1.73577	1.89384	1.75912	0.778789	0.783795	0.678535	0.903385	0.786126	1.02008	1.2552	0.58013	0.969214	0.956155	1.14981	1.14683	1.30144	0.680425	1.06963	1.01425	1.08643	1.43206	1.12531	1.16451	1.46106	1.85296	1.38289	1.79319	1.62252	2.16144	2.01861	1.67728	1.94369	1.95026	2.1762	3.24075	3.10208	2.74213	2.81529	3.88684	3.05728	3.3683	2.03145
AAEL009731	1.8419	2.02386	1.81071	1.9784	1.91372	1.65969	2.05287	1.63657	1.79035	1.78487	2.00083	1.26336	1.90145	1.75692	1.73064	1.28734	1.29781	1.44762	2.04816	1.52023	1.29439	1.45997	1.13502	1.16914	1.26463	1.49403	2.41765	1.12449	1.33417	1.59258	1.60882	2.22338	1.8416	1.56101	1.8087	2.15219	2.063	1.11863	2.06404	1.84946	3.16273	2.58092	3.82294	3.63652	3.30077	4.79598	4.8714	5.39884	4.65115
AAEL009733	73.8142	83.0892	65.3297	69.2063	72.8598	86.3164	60.9497	69.1911	67.0548	70.878	77.1662	64.3597	71.4065	79.437	73.0924	91.3501	68.7837	57.8796	63.1992	70.3031	79.3232	64.593	71.864	81.2544	74.2587	87.9465	83.3464	89.8876	73.9579	83.7846	95.046	90.633	88.3632	89.1979	90.81	90.2647	81.3562	85.4323	70.1263	81.7949	114.705	104.939	119.002	125.744	116.097	182.938	139.986	163.542	131.943
AAEL009736	0.350593	0.56998	0.102576	0.142143	0.291323	0.27542	0.403441	0.127886	0.065539	0.218071	0.197712	0.465587	0.298348	0.6936	0.413812	0.541765	0.816623	0.581403	1.32872	0.817128	1.14866	1.05754	0.320217	0.798999	0.831354	0.825954	0.947879	0.921423	1.05634	0.937899	1.10017	1.10947	1.4752	1.13851	1.20584	1.54638	1.55908	0.819511	1.9111	1.45902	2.31418	3.57618	1.07633	1.17892	2.0364	2.30584	2.13497	1.73032	0.827133
AAEL016712	0	0	0	0	0	0	0	0	0	0	0	0	0	0	0	0	0	0	0.297746	0.0744365	0	0	0	0	0	0	0	0	0	0	0	0	0	0	0	0	0	0	0	0	0	0	0	0	0	0	0	0	0
AAEL023151	11.5845	13.7246	11.4747	13.2747	12.5146	13.8577	12.7386	13.9063	13.9045	13.6018	17.1837	19.4463	19.1209	20.6934	19.1111	18.7995	21.8903	20.043	17.6881	19.6052	10.3359	17.0482	14.423	7.18343	12.2476	5.38686	11.436	5.9042	4.30874	6.75894	4.29792	6.49268	4.30791	4.28801	4.84663	4.56279	7.28874	4.82982	5.10993	5.44782	11.3618	10.2014	13.1635	16.2956	12.7556	44.0272	36.3969	48.3603	50.6995
AAEL009734	10.2078	15.8538	6.21672	6.66611	9.7361	15.5504	11.4228	8.54169	8.99034	11.1263	14.7713	14.6197	25.5565	11.8324	16.695	9.8688	9.62299	8.6099	7.20929	8.82775	8.25856	9.05961	6.86569	8.95026	8.28353	14.0923	21.431	15.4378	14.5981	16.3898	14.4265	21.6902	19.0104	18.573	18.425	18.0527	22.7735	21.7196	22.0117	21.1394	26.571	25.7484	32.9187	31.5907	29.2072	33.2506	28.6389	30.5179	29.2038
AAEL009735	1.64723	3.27631	1.45891	1.8934	2.06896	1.9606	1.73805	1.6084	1.13316	1.61005	1.86677	1.17331	1.59176	1.04088	1.41818	2.33983	0.949583	0.944342	1.18032	1.35352	1.56797	2.46979	1.65212	1.17563	1.71638	2.32478	2.50333	1.14078	2.26299	2.05797	2.27353	2.17195	1.21393	1.99613	1.91389	1.31348	3.25966	1.63037	1.22116	1.85617	2.76363	2.68515	3.43827	1.36	2.56176	1.8382	2.34412	3.70961	2.81619
AAEL027226	0	0	0	0	0	0	0	0	0	0	0	0	0	0	0	0	0	0	0	0	0	0	0	0	0	0	0	0	0	0	0	0	0	0	0	0	0	0	0	0	0	0	0	0	0	0	0	0	0
AAEL019668	2.92004	3.33414	3.30709	3.07853	3.15995	4.0662	4.71369	3.84047	3.94656	4.14173	2.15426	1.41794	1.69438	2.38509	1.91292	5.08252	5.09546	2.69566	4.55222	4.35647	5.60902	5.24897	4.87427	5.22364	5.23897	5.30405	6.55013	5.70198	6.01078	5.89174	5.51211	5.37438	4.8731	4.6259	5.09637	4.31889	4.76156	4.55947	3.75725	4.34929	6.45744	6.02763	7.27688	6.90299	6.66624	7.50677	7.68519	5.90185	6.51263
AAEL022730	0	0	0	0	0	0	0	0	0	0	0	0.104054	0	0	0.0260135	0	0	0	0	0	0	0	0	0	0	0	0	0	0	0	0	0	0	0	0	0	0	0	0	0	0	0	0	0	0	0	0	0	0
AAEL019780	31.7987	37.6057	32.9789	34.8277	34.3028	32.5974	37.573	36.462	35.7142	35.5866	25.8863	25.7859	24.9283	28.479	26.2699	40.1641	45.079	39.042	43.6103	41.9739	60.2129	53.2088	66.8504	62.6146	60.7217	41.3604	51.9578	53.3998	47.2732	48.4978	25.8046	28.2673	24.3641	33.6394	28.0189	31.3433	34.3129	25.2291	32.2647	30.7875	55.483	50.1232	55.7856	63.7145	56.2766	66.1703	95.4775	72.6345	84.7433
AAEL005276	32.2667	31.0689	26.1212	27.1301	29.1467	38.972	30.5047	25.7799	26.3785	30.4088	18.2693	15.4883	15.638	16.8103	16.5515	27.8601	27.0574	12.3145	28.7163	23.9871	45.2853	36.5931	37.3588	45.2494	41.1216	57.2213	55.2963	48.6034	55.603	54.181	86.1745	66.7935	70.1609	75.5922	74.6803	102.263	71.6314	79.3641	84.9217	84.5452	118.735	91.6608	105.607	98.6667	103.667	93.398	78.1584	68.5461	57.2435
AAEL005269	200.875	220.862	188.833	216.937	206.877	218.034	217.464	204.642	213.502	213.411	212.146	221.599	218.304	218.335	217.596	237.59	250.845	234.683	247.673	242.698	258.488	283.687	299.981	268.426	277.646	214.706	266.499	249.504	224.591	238.825	111.347	174.662	103.576	96.4466	121.508	86.223	132.263	97.7211	75.1604	97.8418	117.39	114.057	125.035	146.452	125.733	298.762	250.402	293.399	378.908
AAEL005258	10.4077	17.7519	10.0992	9.83244	12.0228	16.5552	14.7508	12.302	14.1964	14.4511	10.2789	8.82282	8.70565	9.97592	9.44582	10.4706	11.4963	11.0341	9.99308	10.7485	12.9288	16.0864	11.2383	14.1966	13.6125	34.4546	32.559	31.1793	34.1465	33.0848	36.5813	35.3257	33.9833	35.7472	35.4094	34.1196	37.0432	34.9985	31.3939	34.3888	48.743	48.6682	49.5313	53.6005	50.1357	59.2963	54.9182	52.5296	47.6671
AAEL005262	47.3606	47.1836	43.6103	50.9464	47.2752	51.2595	41.4265	47.9508	45.2344	46.4678	36.544	34.9111	35.7574	35.0015	35.5535	28.8696	22.0005	23.2909	22.0312	24.0481	27.9287	27.2075	28.3248	32.5175	28.9946	35.4875	32.6674	33.6041	31.87	33.4073	46.1216	41.0913	45.8175	40.4849	43.3788	53.1079	43.9642	55.683	55.4401	52.0488	89.9241	72.2619	97.5241	94.2086	88.4797	123.48	92.2226	111.051	80.141
AAEL005270	551.123	857.998	498.371	526.212	608.426	723.087	693.481	567.54	640.114	656.055	524.743	554.519	446.628	461.545	496.859	455.858	556.404	501.462	532.635	511.59	488.399	803.517	527.723	543.18	590.705	469.376	732.495	517.791	477.03	549.173	464.877	829.289	561.796	532.225	597.047	466.912	981.528	717.018	549.419	678.719	1082.63	1037.2	1134.53	1486.48	1185.21	2356.27	2242.86	2070.29	2380.45
AAEL005259	34.4925	40.0615	35.8349	38.7764	37.2913	39.712	37.4187	27.486	33.3153	34.483	16.2048	16.9796	17.1666	16.5728	16.731	12.8975	18.3103	16.2574	18.6711	16.534	17.3257	22.6105	19.065	19.4718	19.6183	14.9036	22.7236	14.4925	20.2933	18.1033	17.3473	33.7964	21.628	23.8311	24.1507	26.921	36.7174	31.1256	30.3594	31.2809	54.0906	53.2127	67.8672	71.8035	61.7435	134.554	102.095	115.353	115.579
AAEL026671	4.32709	4.08793	3.74079	4.30896	4.11619	4.39623	3.5285	3.42052	3.60922	3.73862	1.85129	1.73484	1.65197	1.7891	1.7568	2.11242	2.21701	1.1206	2.16857	1.90465	2.39703	2.27179	2.0611	2.02573	2.18891	2.33988	3.04815	2.64913	2.03775	2.51873	2.70119	3.68456	2.16315	2.24475	2.69841	3.12842	3.21607	3.07016	3.98415	3.3497	5.16121	3.95707	4.14951	6.3983	4.91652	9.76808	8.00224	8.04095	8.74532
AAEL005273	2.37584	2.11701	2.35194	3.24239	2.52179	2.72547	2.36423	1.93827	2.6936	2.43039	3.13752	3.54438	2.11878	3.53062	3.08283	3.81025	3.26099	2.98751	4.49883	3.63939	3.25143	2.57653	2.58491	3.21467	2.90688	2.7035	3.97143	2.48833	2.53801	2.92532	3.68705	2.17802	2.38334	2.97461	2.80575	2.77722	2.89092	2.32758	2.96373	2.73986	6.253	2.8535	3.30833	5.05135	4.36654	7.00527	5.5387	6.70896	7.76902
AAEL005277	36.1279	39.6264	36.1696	35.6868	36.9027	44.3561	42.4362	40.1984	37.01	41.0002	36.0094	41.2534	42.4111	31.1463	37.705	27.0165	32.6494	22.6516	21.6742	25.9979	24.1186	32.3159	23.362	26.9219	26.6796	39.1291	45.1956	35.1939	34.8007	38.5798	34.2334	35.8944	25.9986	35.7945	32.9802	37.117	40.7984	33.3135	35.715	36.736	41.7115	41.9457	48.7057	45.7514	44.5286	94.1391	71.1185	100.457	98.5233
AAEL005263	17.023	16.4179	14.8885	16.2503	16.1449	15.2799	14.5554	17.304	15.3116	15.6127	19.347	26.3506	23.3584	22.4818	22.8845	22.9628	28.3946	29.0274	25.7237	26.5271	21.4136	25.982	19.8432	15.5874	20.7066	10.29	18.845	12.2141	9.02135	12.5926	6.20841	11.1839	8.55014	8.37804	8.58013	10.6997	11.2128	9.75762	11.0012	10.6678	23.2445	14.9299	18.3865	20.4383	19.2498	62.2546	36.773	53.9459	62.1455
AAEL005256	0.088782	0.198429	0.257241	0.260333	0.201196	0.052712	0.052371	0.114241	0.225517	0.11121	0.014088	0.096477	0.020504	0.109927	0.060249	0.401407	0.403363	0.290031	0.59406	0.422215	0.217994	0.354741	0.256874	0.600827	0.357609	0.85417	0.545398	0.859002	0.913536	0.793026	1.22172	0.766724	0.441241	1.20537	0.908763	1.0315	0.524041	0.736482	1.49319	0.946305	1.24792	0.912314	1.23895	1.74318	1.28559	1.52488	2.41703	0.737427	1.06103
AAEL020475	0	0	0	0	0	0	0	0	0	0	0	0	0	0	0	0	0	0	0	0	0	0	0	0	0	0	0	0	0	0	0	0	0	0	0	0	0	0	0	0	0	0	0	0	0	0	0	0	0
AAEL025545	0	0	0	0	0	0.027322	0	0	0	0.0068305	0	0	0	0	0	0	0	0	0	0	0	0	0	0	0	0	0	0	0.014256	0.003564	0	0	0	0	0	0	0	0	0.049102	0.0122755	0.009586	0	0	0.0142	0.0059465	0	0	0	0
AAEL005255	35.8946	31.5102	32.6856	34.2832	33.5934	32.6862	27.2383	31.9031	33.034	31.2154	25.5379	23.4525	23.2491	28.0272	25.0667	24.1725	24.4823	17.0909	22.6548	22.1001	28.4332	20.2554	25.8468	28.7182	25.8134	13.6549	17.0517	12.3941	9.63257	13.1833	13.1932	11.4924	10.4543	9.90933	11.2623	11.5688	12.7294	11.7227	12.0811	12.0255	30.7213	19.8511	33.0371	37.67	30.3199	103.195	51.2329	74.8305	62.0379
AAEL025492	0	0	0	0	0	0.029177	0	0	0	0.00729425	0	0	0	0.042018	0.0105045	0	0	0	0	0	0	0	0	0	0	0	0	0	0	0	0	0	0	0	0	0	0.511417	0	0	0.127854	0	0	0	0	0	0	0.412818	0.0768	0
AAEL029010	4.81532	10.7138	5.51965	7.96269	7.25286	7.02576	7.17867	8.61699	6.69165	7.37827	2.24719	3.16064	3.21464	3.54574	3.04205	2.81753	1.61676	1.76512	1.71118	1.97765	0.786952	1.94168	1.22078	1.93239	1.47045	4.69003	5.35868	3.79993	6.6247	5.11833	17.8834	14.128	19.6209	16.4284	17.0152	26.3687	17.7225	22.8193	26.5562	23.3667	69.2655	42.2102	80.4508	101.749	73.4189	58.374	55.3271	49.6518	31.2944
AAEL022351	0.755541	0.76369	0.087376	0.683624	0.572558	0	0.232073	0	0.1783	0.102593	0.311099	0	0	0.300517	0.152904	0	0.202449	0	0.350439	0.138222	0.155727	0.188599	0.409264	0	0.188397	0.284253	0.14951	0.721064	0.197305	0.338033	0.284077	0.319023	0.282835	0.189978	0.268978	0.569998	0.253667	0.654222	0.563214	0.510275	1.66944	0.237548	1.67969	1.51997	1.27666	1.43538	1.02794	0.835559	1.70572
AAEL025226	3.95006	4.78028	3.45949	3.25962	3.86236	4.4739	3.41115	3.72898	3.65115	3.8163	3.08921	3.67317	3.87366	3.5836	3.55491	5.13538	5.10868	1.91372	3.71438	3.96804	5.29553	7.45027	7.04683	6.05574	6.46209	7.89995	9.12319	6.17765	9.93178	8.28314	15.6298	9.90521	12.4589	14.214	13.052	20.9244	8.96249	13.7631	16.4727	15.0307	14.3233	10.9731	15.2663	15.9368	14.1249	12.9699	15.7422	10.357	9.67705
AAEL022836	0	0	0	0	0	0	0	0	0	0	0	0	0	0	0	0	0.069016	0	0	0.017254	0	0.203667	0.11144	0	0.0787768	0	0	0.093006	0.117279	0.0525712	0	0	0	0	0	0	0	0.147366	0.07712	0.0561215	0	0	0	0	0	0	0	0	0
AAEL004897	0.014334	0.011838	0	0	0.006543	0	0	0	0	0	0.016247	0	0	0.015006	0.00781325	0	0	0.045476	0.026101	0.0178943	0.094315	0.028103	0.031003	0	0.0383553	0	0.023381	0	0.014501	0.0094705	0	0.023642	0.012154	0.072903	0.0271747	0.022816	0	0.012166	0.011963	0.0117363	0.05775	0.018212	0.016666	0.038981	0.0329023	0	0.061331	0	0.024343
AAEL004899	0	0	0	0	0	0.145674	0	0	0	0.0364185	0	0	0	0	0	0	0	0	0	0	0	0	0.610494	0	0.152623	0	0	0	0	0	0	0	0	0	0	0	0	0	0	0	0	0	0	0	0	0	0	0	0
AAEL004914	37.707	42.4174	35.7787	37.3276	38.3077	36.4254	38.5979	41.3543	38.5104	38.722	51.1647	54.5284	49.2433	57.0666	53.0007	59.2645	70.2836	65.561	66.0132	65.2806	63.3224	90.0112	72.2403	66.7651	73.0847	41.4514	60.2481	51.2143	44.412	49.3315	19.8045	34.0953	21.2106	23.1209	24.5578	24.626	30.2893	23.5555	20.6912	24.7905	35.8458	34.3375	40.3808	42.8606	38.3562	78.8778	68.6828	80.7418	78.3092
AAEL004900	5.92766	12.1929	6.81112	6.26124	7.79824	11.4281	10.9433	8.45128	9.27445	10.0243	9.18428	10.2025	8.10571	9.98998	9.37061	7.53005	8.70442	7.37846	9.40239	8.25383	9.4718	15.088	8.71935	11.9373	11.3041	16.0069	22.8566	15.7718	15.8659	17.6253	12.6989	22.303	16.2785	17.146	17.1066	15.7202	22.8119	18.4936	14.9537	17.9949	21.0942	28.5351	22.7426	30.5637	25.7339	25.3948	35.8763	26.1165	32.9435
AAEL004898	0	0	0	0	0	0.029868	0	0	0	0.007467	0	0	0	0	0	0	0	0	0	0	0	0	0	0	0	0	0	0.029807	0.028209	0.014504	0	0	0	0	0	0	0	0	0	0	0.026269	0	0	0	0.00656725	0	0	0	0.031534
AAEL026370	0	0.103647	0.240004	0	0.0859127	0.181257	0	0.670842	0	0.213025	0	0	0	0	0	0	0	0	0	0	0	0	0	0.074055	0.0185137	0.361283	0.283181	0	0	0.161116	0.329216	0.309866	0.443363	0.368379	0.362706	0.248702	0.505658	0	0.548578	0.325734	0.033894	0.318923	0.452411	0	0.201307	0	0	0.266469	0.043113
AAEL020456	0	0	0	0	0	0	0	0	0	0	0	0	0	0	0	0	0	0	0	0	0	0	0	0	0	0	0	0	0	0	0	0	0	0	0	0	0	0	0	0	0	0	0	0	0	0	0	0	0
AAEL024071	0.059695	0	0	0	0.0149237	0.043427	0	0	0	0.0108568	0	0	0	0	0	0	0	0	0	0	0	0	0	0	0	0	0	0.0379	0	0.009475	0	0	0	0	0	0.066546	0	0	0	0.0166365	0	0	0	0	0	0.04839	0	0	0.085995
AAEL004913	18.6072	21.3898	14.3779	17.529	17.976	20.5917	16.1025	18.368	15.6129	17.6688	47.5562	41.5015	53.4866	43.7295	46.5685	29.0521	23.0561	21.2444	22.6493	24.0005	21.6257	23.3404	24.2169	23.7788	23.2404	21.8093	23.9118	18.3576	16.5381	20.1542	21.7874	21.7158	19.336	17.3289	20.042	24.109	21.1954	22.9725	21.6356	22.4781	36.5748	30.9874	32.5586	33.3625	33.3709	43.6241	37.9851	36.7111	30.7892
AAEL004896	4.51096	4.76047	3.90213	3.76585	4.23485	4.03895	4.15903	4.2878	3.91702	4.1007	6.59623	7.1203	7.55442	8.09545	7.3416	5.16002	7.48632	7.6468	6.65626	6.73735	3.95275	4.98478	4.47824	3.08077	4.12413	2.07364	3.83129	2.03135	1.95022	2.47162	1.70982	2.1412	1.64483	1.41541	1.72782	1.94275	2.7541	1.84306	2.0122	2.13803	3.72149	3.731	4.26907	4.99305	4.17865	12.4862	11.0747	13.7797	14.4597
AAEL023213	0.370158	0.812455	0.11331	0.324356	0.40507	1.0073	0.471863	0.150282	0.278624	0.477018	0	0.530396	0.353696	0.23154	0.278908	0.187756	0.19367	0.170101	0.200268	0.187949	0.179426	0.180839	0.410032	0.385485	0.288945	0.305763	1.00652	0.086234	0.367382	0.441474	0.171738	0.506505	0.334036	0.289869	0.325537	0.569176	0.443804	0.232921	0.171916	0.354454	0.33059	0.981419	0.946273	0.493896	0.688044	0.87274	0.964251	0.868993	0.320709
AAEL004905	11.0437	10.3278	10.137	11.7502	10.8147	10.6789	10.2528	10.8712	11.6012	10.851	2.67183	2.7322	2.24832	3.33279	2.74629	5.22499	6.19782	2.71217	5.38641	4.88035	7.2655	5.86864	5.91302	6.88975	6.48423	7.82066	7.74892	6.65096	7.63331	7.46346	24.2554	19.1518	19.963	23.7195	21.7724	29.2985	17.1662	23.4795	28.4947	24.6097	24.5744	28.9418	23.5001	20.8789	24.4738	14.714	24.4256	16.5825	22.269
AAEL023162	0.13357	0.232753	0.211871	0	0.144548	0.160824	0	0.148878	0.139385	0.112272	0.171651	0.103128	0.32272	0.174143	0.192911	0	0.04042	0	0	0.010105	0.08358	0	0.040639	0	0.0310547	0.175631	0.044643	0.060254	0.108247	0.0971937	0.27525	0.087703	0.094953	0.141271	0.149794	0.253506	0.130283	0.300671	0	0.171115	0.358023	0.095173	0.218898	0.268709	0.235201	0.152666	0.320475	0.502765	0.383488
AAEL004910	8.29267	11.0411	8.22303	8.14286	8.92493	9.75267	7.83751	5.98041	8.15115	7.93044	4.09533	4.62695	4.20915	3.86004	4.19787	4.8871	4.48951	3.30072	4.72937	4.35168	5.22472	6.05134	4.90458	5.92321	5.52596	4.74248	5.01655	5.30767	4.6673	4.9335	3.17282	4.94627	4.31334	3.22699	3.91485	3.78007	5.29716	4.47507	4.31773	4.46751	8.92434	5.58442	9.57899	9.62386	8.4279	17.8071	13.701	17.7658	16.5056
AAEL027466	1.26483	0.956546	1.02994	1.71289	1.24105	1.65236	1.50404	0.337653	1.03631	1.13259	0.336103	0.158975	0.368434	0.24779	0.277826	0.283221	0.413189	0.209412	0.487849	0.348418	0.137479	0.741536	0.26738	0.186913	0.333327	0.117538	0.534493	0	0.346338	0.249592	0	0.480254	0.706925	0.327359	0.378634	0.494546	1.01804	0.4151	0.497843	0.606383	0.641777	0.875408	0.992784	1.23769	0.936915	2.41859	0.801193	2.45413	6.80128
AAEL004902	43.8177	54.5483	38.1537	41.1272	44.4117	52.221	41.6138	42.8378	38.2818	43.7386	47.2967	39.5948	42.4606	46.9132	44.0663	45.7171	41.9314	32.9889	43.2208	40.9646	50.4697	42.9567	46.4365	48.0496	46.9781	62.8527	60.9731	60.7689	61.6135	61.552	96.9517	73.4324	86.0237	79.121	83.8822	116.856	80.7049	92.4519	96.2123	96.5564	168.832	134.222	162.448	142.818	152.08	153.119	119.89	124.997	91.6326
AAEL004911	5.79884	6.37634	5.55762	5.83625	5.89226	6.60112	5.13807	5.29005	5.50878	5.6345	5.42078	4.47724	4.95866	6.00109	5.21445	4.15468	5.62314	4.42044	4.39229	4.64764	5.10688	5.30378	4.36631	4.01593	4.69822	4.75147	4.96927	4.66399	3.83642	4.55529	5.47824	5.06021	4.47411	4.35648	4.84226	4.64833	4.9227	4.87875	5.58332	5.00828	7.75717	7.88759	8.8815	9.69947	8.55643	17.7434	13.0622	16.989	15.5811
AAEL004916	3.7638	3.40501	3.01136	2.42971	3.15247	3.70185	2.8184	2.90306	2.8246	3.06198	3.58511	3.07282	2.66697	3.8758	3.30018	5.99708	4.34525	3.92011	5.59134	4.96345	5.70093	4.85243	5.91597	6.3706	5.70998	6.95818	6.19392	7.27536	5.75547	6.54573	7.61024	6.16972	5.77172	6.18403	6.43393	6.59479	4.89991	4.57993	5.13794	5.30315	7.95286	7.18937	7.50091	8.00944	7.66315	11.1999	9.69695	8.38584	8.19742
AAEL018724	0	0	0	0	0	0.118966	0	0	0.075179	0.0485363	0	0	0	0.49489	0.123722	0	0	0.131324	0	0.032831	0.525719	0	0	0.178808	0.176132	0	0.192773	0.443509	0.432448	0.267182	0.308981	0.425111	0.127929	0.188527	0.262637	0	0.679863	0	0.231612	0.227869	0	0	0	0	0	0.288279	0	0.226704	0
AAEL027655	0.113307	0.112969	0.109839	0.22012	0.139059	0.193704	0.257392	0.156428	0.186974	0.198624	0.062603	0	0.046036	0.097372	0.0515027	0.094724	0.155436	0.045684	0.063033	0.0897193	0.296789	0.232701	0.076944	0.295011	0.225361	0.350108	0.430186	0.184597	0.374247	0.334784	0.570058	0.418643	0.203104	0.336763	0.382142	0.333261	0.35442	0.213159	0.32945	0.307573	0.23541	0.105995	0	0.194469	0.133968	0.057583	0.14178	0.033682	0.20563
AAEL027862	0.065012	0	0	0	0.016253	0	0	0.065101	0	0.0162752	0	0	0	0.049356	0.012339	0.030857	0	0	0	0.00771425	0	0	0	0	0	0	0.048843	0.015323	0	0.0160415	0.203767	0.039144	0.053662	0.076224	0.0931992	0	0.028055	0.04957	0.050859	0.032121	0	0	0	0	0	0	0	0.018649	0.099189
AAEL000269	647.135	503.349	674.772	679.711	626.242	572.74	536.729	541.329	625.54	569.085	215.032	204.497	241.861	199.144	215.134	155.531	159.199	157.713	155.136	156.895	137.869	172.671	149.15	137.082	149.193	137.824	153.805	137.1	109.309	134.51	172.116	165.158	172.164	154.38	165.954	205.19	212.727	215.386	198.068	207.843	313.998	287.415	345.124	335.28	320.454	537.039	456.842	622.317	542.01
AAEL000282	2.09681	1.44477	1.2349	1.2223	1.4997	1.91677	0.938617	1.0407	1.33541	1.30787	1.08499	0.921894	0.739963	1.19038	0.984306	0.798687	1.07629	0.586102	0.915263	0.844086	1.50494	0.933104	1.45026	0.866532	1.18871	1.8516	1.54705	1.51415	1.52472	1.60938	3.67669	2.52948	3.02544	3.10618	3.08445	4.18248	2.4145	3.16601	3.85167	3.40367	7.70483	5.03997	7.76514	5.18389	6.42346	6.51381	4.15538	4.30174	3.75721
AAEL000257	5.50726	5.89324	4.32053	4.47545	5.04912	5.42738	4.96411	3.97657	5.41345	4.94537	6.99221	6.93278	6.88568	8.62815	7.35971	8.57961	8.72166	9.94049	7.69717	8.73473	6.90217	6.38283	7.53671	7.28489	7.02665	4.12669	6.98124	5.12778	4.50885	5.18614	3.1486	4.09045	2.95942	3.36099	3.38987	3.45702	4.55639	3.68591	3.03996	3.68482	7.10233	6.81202	7.65138	8.03354	7.39982	14.2999	12.1303	13.8781	13.8863
AAEL018011	0	0	0.059128	0	0.014782	0	0	0	0	0	0	0	0	0	0	0	0	0	0	0	0	0	0.034952	0	0.008738	0	0	0	0	0	0	0.026654	0.08057	0	0.026806	0	0.028464	0.026104	0	0.013642	0	0	0	0	0	0	0	0.037843	0
AAEL026994	4.51871	2.80598	2.42337	3.1657	3.22844	4.02507	2.31679	2.44339	2.72426	2.87738	1.0031	0.790039	0.403285	1.02175	0.804544	0.693491	1.19362	0.349278	0.898256	0.783662	1.21583	1.53988	1.03768	1.25364	1.26176	1.71072	2.39536	1.43256	3.08639	2.15626	4.60288	3.06828	2.42848	2.53306	3.15817	3.40766	2.01038	3.04147	3.33351	2.94825	4.52559	3.25602	3.08946	4.56903	3.86003	5.99521	4.04701	3.74509	5.31862
AAEL023802	1.0029	0.157545	0.160577	0.134901	0.36398	0.119424	0.144586	0.505001	0.375455	0.286116	0.040915	0.111009	0.115069	0.027162	0.0735387	0.187921	0.06209	0.530353	0.136081	0.229111	0.653034	0.108328	0.201716	0.350149	0.328307	0.117817	0.085291	0.798782	0.146304	0.287048	0.144845	0.117693	3.21729	0.092748	0.893143	0.37683	0.271245	4.8759	0.885694	1.60242	6.6221	7.19643	0.173049	1.61072	3.90057	0.248893	9.4355	0.199488	0.15234
AAEL000281	0.887016	3.6629	1.60059	1.90191	2.0131	2.85926	2.49654	2.55895	1.76001	2.41869	1.10614	0.687631	0.663009	0.880369	0.834288	1.2048	0.462453	0.065447	0.336501	0.5173	0.051509	1.04557	0.063382	0.764263	0.481182	1.58782	2.24363	1.72379	2.59496	2.03755	3.44174	3.22572	0.943855	3.6542	2.81638	3.82558	4.10051	0.98263	1.26281	2.54288	1.24243	1.22453	6.52578	5.20146	3.54855	10.7794	2.45366	8.68438	5.68993
AAEL028778	0	0	0	0	0	0	0	0	0	0	0	0	0	0	0	0	0	0	0	0	0	0	0	0	0	0	0	0	0	0	0.609497	0	0	0	0.152374	0	0	0	0	0	0	0	0	0	0	0	0	0	0
AAEL016028	0	0	0.998443	0	0.249611	0	0	0	0.009076	0.002269	0	0	0	0	0	0	0	0	0	0	0	0	0	0	0	0	0	0	0	0	0	0	0	0	0	0	0	0	0	0	0	0	0	0	0	0	0	0	0
AAEL028893	0	0	0	0	0	0	0	0	0	0	0	0	0	0	0	0	0	0	0	0	0	0	0	0	0	0	0	0	0	0	0	0	0	0	0	0	0	0	0	0	0	0	0	0	0	0	0	0	0
AAEL016033	0	0.096246	0	0	0.0240615	0	0	0	0	0	0	0	0	0	0	0	0	0	0	0	0	0	0	0	0	0	0	0	0	0	0	0	0	0	0	0	0	0	0.162187	0.0405467	0	0	0	0	0	0	0	0	0
AAEL000288	2.39163	2.11729	2.09447	1.44832	2.01293	1.68078	1.07314	1.54177	1.2657	1.39035	1.73117	0.919708	1.47383	1.40414	1.38221	1.299	1.05627	0.620338	0.807309	0.945729	1.14093	0.899802	1.31555	1.08587	1.11054	1.3835	1.18997	1.00004	1.56546	1.28474	2.91197	2.19807	2.61719	3.00385	2.68277	3.73892	1.88835	3.51089	3.70816	3.21158	6.02895	4.50554	7.01082	8.04841	6.39843	5.25931	4.68485	4.22154	3.28092
AAEL000284	11.8545	11.6513	9.43672	9.97078	10.7283	11.4553	9.99525	9.01918	11.496	10.4914	11.4036	11.1018	10.8116	12.0689	11.3465	11.8259	10.2921	11.1979	10.9496	11.0664	8.92264	9.91597	10.2628	7.89014	9.24788	6.87825	7.57868	9.21844	5.74906	7.35611	7.12913	5.78009	6.20519	4.41139	5.88145	5.18516	6.16835	4.72928	5.40121	5.371	10.4631	8.63232	8.76114	10.9553	9.70296	27.4147	22.8657	27.635	36.2052
AAEL000293	140.236	154.98	130.124	148.179	143.38	153.217	160.152	134.153	153.836	150.34	197.704	264.48	198	269.943	232.532	291.85	391.454	231.051	300.7	303.764	331.737	383.292	387.047	362.253	366.082	154.755	221.677	172.119	133.688	170.56	66.3567	102.798	58.6067	58.7856	71.6367	68.0955	80.7419	63.1491	58.4758	67.6156	77.3005	74.8623	72.7234	87.6285	78.1287	138.625	130.632	118.404	195.801
AAEL000271	76.4266	109.98	69.629	85.5971	85.4082	88.808	85.6086	90.2868	91.7231	89.1066	82.1485	83.1059	63.1632	77.2569	76.4186	63.6654	55.2691	39.4693	47.3474	51.4378	60.8273	60.6954	32.9291	55.5506	52.5006	153.274	140.532	129.947	154.453	144.551	218.552	205.02	229.829	247.296	225.174	297.234	286.992	261.669	293.845	284.935	255.268	292.064	291.508	213.579	263.105	229.538	268.106	246.078	176.527
AAEL012756	6.13299	5.06644	4.99232	5.47916	5.41773	5.59126	4.97385	5.01569	5.95032	5.38278	2.60963	2.55306	2.27222	2.35625	2.44779	2.81643	2.79597	1.00066	2.23672	2.21245	3.57585	3.7202	2.89805	3.61159	3.45142	5.30595	6.16464	4.05891	4.85258	5.09552	8.13466	6.49474	5.37374	6.06492	6.51701	7.89053	5.24725	6.97474	7.44622	6.88969	9.19032	8.2297	7.38908	8.627	8.35902	9.81638	11.2907	8.6888	10.1368
AAEL012751	9.89222	8.80892	8.93984	9.47868	9.27991	9.98233	9.20813	7.97664	9.07841	9.06138	5.22095	4.82179	4.58408	4.94515	4.89299	6.84032	4.90269	3.48439	4.95176	5.04479	5.60611	5.09731	6.31701	6.19205	5.80312	6.26278	7.05685	6.3933	6.93112	6.66101	8.46381	7.09506	6.43527	7.98712	7.49531	7.60771	6.47904	7.86707	7.88838	7.46055	11.2759	8.51761	10.0948	10.8258	10.1785	15.2731	11.8946	13.8837	14.5767
AAEL012755	0	0	0	0	0	0	0	0	0	0	0	0	0	0.036779	0.00919475	0	0	0	0	0	0	0	0	0.045502	0.0113755	0	0	0	0.043661	0.0109152	0	0	0	0	0	0	0	0	0	0	0	0	0.050348	0	0.012587	0	0	0	0
AAEL028005	0.735102	2.05379	1.10697	0.570872	1.11669	1.53192	1.05442	1.21017	0.923222	1.17993	2.10588	1.15089	0.867547	1.08116	1.30137	1.32063	0.669688	0.619345	1.08738	0.924261	1.86972	2.53449	2.62449	2.21643	2.31128	3.52718	3.67419	3.96688	4.14387	3.82803	5.07612	6.23621	6.28013	5.67964	5.81802	6.0819	6.73137	4.90171	5.1308	5.71145	5.62595	12.6896	5.62844	6.64566	7.6474	4.84831	7.78271	4.01035	5.1681
AAEL023114	17.3341	19.8063	21.2874	16.9281	18.839	19.1677	16.5753	16.5681	17.1631	17.3686	4.27783	4.58633	4.78344	2.58112	4.05718	4.21921	4.53515	3.06127	3.65543	3.86776	9.22765	5.62426	7.88328	11.1403	8.46886	16.1586	13.8959	17.4699	14.6346	15.5398	21.9038	18.1298	23.4534	23.5409	21.757	32.0919	21.0203	27.5369	29.2384	27.4719	30.185	31.3552	29.3423	21.3846	28.0668	9.03075	14.0607	15.6321	12.9755
AAEL012510	24.624	38.7486	20.3191	22.85	26.6354	34.3763	26.2039	28.8212	23.4839	28.2213	44.2054	37.4788	35.8789	35.4219	38.2462	29.9365	26.4646	29.9031	21.6528	26.9892	24.7271	28.4456	23.4403	27.0242	25.9093	36.9936	37.868	34.3347	32.1147	35.3278	53.5937	46.1152	43.9383	47.5797	47.8067	50.229	50.7706	48.1383	47.7137	49.2129	59.9868	64.354	63.6094	58.5935	61.6359	78.7898	71.4306	65.8103	62.6696
AAEL012503	23.9971	24.5788	22.5104	22.5969	23.4208	25.8138	21.0473	20.3597	23.2301	22.6127	16.4323	16.2569	18.8509	18.194	17.4335	15.5695	13.9773	12.3196	12.4326	13.5748	16.6747	13.3615	15.1363	16.6178	15.4476	15.2507	16.6836	15.2856	13.2093	15.1073	18.464	14.5989	17.5983	15.7376	16.5997	20.7682	15.9968	16.4652	20.0944	18.3312	31.2804	28.1761	34.9088	34.1802	32.1364	42.1719	39.686	40.2191	41.9853
AAEL012514	10.3539	11.3486	7.74741	9.33866	9.69714	10.4175	10.4871	9.36368	8.89589	9.79105	12.4349	12.3541	12.0084	13.1002	12.4744	12.3683	12.8201	14.5829	11.611	12.8456	12.4556	13.2098	10.38	10.2945	11.585	8.78322	11.4818	8.10622	7.75877	9.03251	9.11063	10.5439	9	8.22233	9.21921	10.0171	9.83548	7.68642	9.23613	9.19379	14.696	15.2162	16.2998	17.8775	16.0224	21.9333	26.208	21.7226	20.7245
AAEL012515	14.2749	21.593	16.5352	14.9972	16.8501	19.4305	17.1159	18.2384	16.0506	17.7089	22.44	22.2703	19.0212	22.106	21.4594	21.3468	21.4249	21.1459	21.1713	21.2722	24.0748	27.552	23.4885	26.5786	25.4235	32.2024	37.1783	33.7545	31.2383	33.5934	32.4326	35.8958	31.3788	30.9236	32.6577	34.0427	38.7877	30.8829	32.1387	33.963	42.6585	40.5407	46.6593	48.8413	44.6749	48.983	46.0818	48.0178	43.0545
AAEL012511	9.90675	12.3113	10.6168	30.2913	15.7816	9.78332	8.12087	30.202	10.8335	14.7349	22.3645	22.0576	19.2821	26.4834	22.5469	35.0487	35.2579	38.298	32.1245	35.1823	42.4075	33.2027	47.082	47.8822	42.6436	18.5982	26.4278	26.6602	20.7358	23.1055	9.65642	40.8989	7.42311	7.52946	16.377	24.1809	7.92842	24.1825	18.2996	18.6479	9.27957	24.2665	6.73882	30.4262	17.6778	50.8364	10.8105	16.2522	15.0068
AAEL024853	54.0467	60.8404	44.6701	49.3779	52.2338	61.4695	54.5156	57.2354	52.8144	56.5087	74.2816	74.7991	74.1861	81.5999	76.2167	102.991	98.3976	101.903	98.509	100.45	99.0672	103.128	126.618	98.2611	106.769	48.9641	62.8577	51.6719	38.2128	50.4266	30.3812	36.5491	30.9875	26.1781	31.024	27.4335	33.5224	27.2592	24.7752	28.2476	40.3478	38.1246	47.8037	54.5359	45.203	129.554	102.931	123.814	145.028
AAEL012508	2.55178	2.87099	1.87919	2.42847	2.43261	3.31334	1.95858	2.87528	1.54151	2.42218	2.59325	3.52481	3.34652	2.84677	3.07783	2.33237	2.16562	2.12964	2.5646	2.29806	2.04615	3.50201	2.2467	1.55508	2.33748	3.39973	4.99655	4.74786	3.23902	4.09579	2.29122	3.00945	1.73199	1.76877	2.20036	1.87652	2.79448	1.75006	1.20322	1.90607	1.81229	2.71774	1.97076	2.90663	2.35185	3.7702	5.22595	3.75158	5.45029
AAEL012509	14.2782	16.604	13.4525	17.4011	15.434	7.27132	10.9793	6.53593	10.8261	8.90317	4.92309	5.53573	7.09015	8.08354	6.40813	7.71872	8.43523	7.82901	11.4276	8.85264	6.69226	10.9369	11.8462	13.3159	10.6978	19.1968	18.4997	15.4656	23.8797	19.2605	10.8901	16.3379	10.2087	13.1918	12.6571	5.35672	4.75779	4.95372	11.3253	6.59838	21.1313	18.6566	29.5929	31.5446	25.2313	16.3373	8.45195	19.7124	17.2802
AAEL018241	119.932	88.2825	66.4299	72.3531	86.7493	119.128	68.0248	60.9139	69.9737	79.5102	32.1158	26.1393	28.8902	28.8768	29.0055	21.4177	12.0248	3.9449	6.70262	11.0225	14.026	29.9269	7.57204	11.6326	15.7894	32.185	47.9987	18.3087	20.0025	29.6237	48.9042	45.8819	36.8125	27.2075	39.7015	27.7856	38.2635	21.3811	14.4554	25.4714	33.6966	41.8538	31.3297	25.3579	33.0595	62.2414	54.8268	40.2695	52.2441
AAEL012513	26.9349	25.3871	24.3023	24.4901	25.2786	26.0326	22.9745	25.6044	22.5443	24.289	36.9827	33.4634	29.224	39.2885	34.7396	18.5906	18.7099	17.0019	17.2092	17.8779	24.8729	25.0744	19.3964	25.1401	23.6209	32.8471	28.7482	29.8402	40.235	32.9176	68.6087	47.3744	56.7618	57.9022	57.6618	96.2643	67.184	82.2978	88.5256	83.5679	132.523	110.131	131.632	124.579	124.716	170.89	110.086	98.0642	79.3721
AAEL020224	0	0	0	0	0	0	0	0	0	0	0	0	0	0	0	0	0	0	0	0	0	0	0	0	0	0	0	0.050007	0	0.0125017	0	0	0	0.002067	0.00051675	0	0	0	0	0	0	0	0	0	0	0	0	0	0
AAEL004657	30.0993	38.0286	26.7081	26.9158	30.4379	33.3835	29.172	30.9628	29.4647	30.7458	27.9911	22.6374	23.9129	28.0388	25.645	31.712	26.1549	22.712	24.4058	26.2461	27.8795	28.2779	28.236	32.4612	29.2136	56.2327	50.4087	59.7051	55.961	55.5769	91.7988	85.2933	106.076	102.479	96.4117	121.853	105.176	113.454	108.947	112.357	150.766	142.351	152.075	160.438	151.407	135.099	130.179	130.763	105.235
AAEL004661	47.9545	46.1704	36.0063	40.1999	42.5828	55.9188	39.8624	36.8005	41.5945	43.544	31.6889	31.858	24.7983	34.4466	30.698	38.8614	37.2504	27.1435	36.3689	34.9061	49.6384	45.3013	44.2206	57.4094	49.1424	97.5209	89.7182	95.0567	107.216	97.3779	135.136	123.538	130.581	126.053	128.827	120.934	114.04	121.66	127.949	121.146	102.955	108.738	96.7333	96.3263	101.188	88.2297	93.5001	87.3593	77.9506
AAEL004662	7.28015	8.89542	7.57597	7.76476	7.87907	9.21899	5.20848	6.54049	6.78758	6.93888	4.87587	4.98968	5.13817	2.39908	4.3507	5.11297	4.29701	4.1773	4.98874	4.64401	4.50323	5.35895	3.74337	4.36285	4.4921	5.23046	8.13367	9.07489	6.24266	7.17042	14.4701	14.5671	18.1982	14.045	15.3201	25.1577	26.1757	22.3592	24.2894	24.4955	37.0489	35.0924	37.6079	48.428	39.5443	39.6313	51.4973	40.1427	41.5794
AAEL004684	6.60618	6.46724	7.44713	8.38429	7.22621	7.53501	6.84543	6.19062	9.80964	7.59518	2.88352	2.93408	3.27596	3.9476	3.26029	1.51745	1.79439	1.20483	2.33253	1.7123	2.81664	3.30017	1.99375	3.34297	2.86338	4.82513	4.29753	5.62564	6.33223	5.27013	7.43428	5.13039	5.71244	7.92692	6.55101	8.29081	5.93477	8.54869	9.06417	7.95961	2.33662	4.92244	2.34649	1.52677	2.78308	1.01842	2.85482	2.23621	3.86013
AAEL004682	31.6393	35.1749	30.9728	31.4852	32.3181	33.7123	33.2687	34.6225	32.2246	33.457	37.8298	33.037	36.1322	37.6072	36.1515	50.9609	57.4155	57.0785	62.3164	56.9428	62.955	67.9711	72.9441	91.2511	73.7803	73.8348	74.7197	89.3411	83.3259	80.3054	72.4916	70.7192	74.1278	89.3073	76.6615	107.866	68.6356	106.199	117.94	100.16	113.003	90.6126	110.584	98.2846	103.121	75.3632	85.5961	72.5466	68.5436
AAEL018326	26.5602	28.9258	23.4638	27.5069	26.6142	31.0509	34.7085	61.5026	37.5354	41.1994	246.865	234.688	207.16	236.031	231.186	210.573	245.534	185.864	253.447	223.855	144.383	182.797	166.671	153.436	161.822	144.609	154.691	144.33	148.313	147.986	109.019	145.365	110.761	113.002	119.537	74.8832	79.1954	81.6636	79.934	78.9191	31.1049	54.6852	25.5909	23.0958	33.6192	13.7063	38.3676	24.9483	18.0566
AAEL007220	0.032608	0	0	0	0.008152	0	0	0	0	0	0	0.07218	0	0.115192	0.046843	0.062117	0	0	0.145473	0.0518975	0	0.03286	0	0.048348	0.020302	0	0.025975	0	0	0.00649375	0.112509	0	0.027096	0	0.0349013	0.034291	0	0.027124	0	0.0153537	0.045157	0.12167	0	0	0.0417068	0.041433	0	0	0
AAEL007208	3.94656	2.85756	2.88105	2.78068	3.11646	3.72053	3.91567	2.54941	2.92561	3.2778	4.00474	2.67364	3.36123	4.41584	3.61386	3.73019	3.41869	1.28701	2.97172	2.8519	3.57578	2.84407	2.44704	2.8532	2.93002	1.91831	2.0259	1.32457	1.26884	1.63441	2.19233	1.92187	1.79306	1.94901	1.96407	2.05674	1.79416	1.34419	1.84475	1.75996	3.066	2.33037	1.51035	1.88586	2.19815	1.34234	2.41669	1.15525	1.93484
AAEL007218	0.497993	1.30085	1.17925	0.460155	0.859564	0.572382	0.069301	0.232068	0.162268	0.259005	0.490712	1.15564	0.573728	0.491823	0.677976	0.544187	0.791746	0.387496	1.17399	0.724353	0.180499	0.11982	0.428638	0.322067	0.262756	0.583384	0.252106	0.233526	0.308203	0.344305	0.312824	0.725934	0.534457	0.588753	0.540492	0.258724	0.557331	0.187878	0.248576	0.313127	1.51194	0.939961	1.50693	1.91768	1.46913	1.39851	0.990266	0.948601	1.02215
AAEL007206	6.02549	4.20859	3.45271	4.09869	4.44637	4.5976	3.31993	2.78551	3.34509	3.51203	2.73173	3.26142	2.88489	3.26316	3.0353	3.57071	4.81103	3.07514	4.86667	4.08089	8.37158	6.52485	7.41873	11.9695	8.57116	16.6986	15.0212	20.1901	20.0122	17.9805	20.094	22.2382	21.0984	25.1298	22.1401	33.7631	18.5078	24.7683	31.1115	27.0376	43.8589	32.3674	42.0268	39.0222	39.3188	18.9623	16.1496	20.3525	12.2775
AAEL002493	4.12498	5.86451	4.07484	5.3355	4.84996	5.75955	6.29864	6.06815	4.49636	5.65567	9.92429	8.30421	9.15165	10.3706	9.4377	11.8816	11.5305	12.5376	14.5597	12.6273	10.0379	12.8211	12.5281	10.6621	11.5123	6.72489	8.28781	7.92302	3.89823	6.70849	3.02407	4.18164	2.6781	2.8605	3.18608	3.68825	4.34229	2.67308	1.68853	3.09804	3.5792	4.65295	5.3478	4.60689	4.54671	14.015	10.3923	10.4895	15.6718
AAEL002463	14.9836	12.5719	12.3886	13.9785	13.4806	14.8959	13.5454	14.4706	14.2116	14.2809	12.3579	10.0961	11.2589	11.0749	11.1969	9.90877	9.80912	7.79539	8.1273	8.91014	10.6581	9.30472	8.66401	9.22996	9.46419	8.78772	9.76566	7.39299	6.62244	8.1422	10.1233	9.06626	7.55002	9.13719	8.96919	11.6236	8.51423	11.3216	11.3304	10.6975	17.4284	13.2861	16.0949	18.9364	16.4364	25.333	18.2545	22.059	21.7853
AAEL010877	0.6972	0.736709	0.542764	0.552688	0.63234	0.499958	0.187864	0.371161	0.220623	0.319902	0.542819	0.449526	0.311483	0.458531	0.44059	0.600667	0.418637	0.111035	0.291293	0.355408	0.606812	0.838986	0.47568	0.415526	0.584251	0.336944	0.917353	0.665857	0.715559	0.658928	0.641265	0.799509	0.811108	0.762911	0.753698	0.948068	1.25389	0.844887	0.722679	0.942382	1.69451	1.59494	2.10078	2.38831	1.94464	3.10528	2.9205	3.39253	2.45581
AAEL002483	12.0434	11.7683	11.9197	13.4613	12.2982	12.1593	12.6746	11.7933	14.0984	12.6814	12.7367	14.832	13.68	15.8424	14.2728	17.5619	17.7497	17.4143	19.9945	18.1801	20.1208	19.4705	22.7362	21.0823	20.8525	8.67619	12.9206	12.0427	9.74031	10.845	5.28363	7.60533	4.9284	5.5538	5.84279	4.91275	6.42849	5.40651	5.17168	5.47985	7.51274	7.25754	8.50782	8.98467	8.06569	20.8594	15.3569	19.8643	24.1465
AAEL002486	6.57115	8.79667	7.00517	5.85722	7.05755	8.71648	7.48906	7.91553	6.89263	7.75342	13.4485	12.9615	11.109	12.8852	12.6011	14.8788	14.8193	16.1201	15.4321	15.3126	15.1457	11.0756	13.7717	12.2833	13.0691	6.69963	9.51728	7.24508	4.66424	7.03156	5.84304	6.6982	4.74087	3.44006	5.18054	5.40303	6.55015	4.42088	4.71999	5.27351	10.0465	8.80082	8.25964	8.5516	8.91465	22.4454	14.7332	19.597	20.3969
AAEL020103	0	0	0	0	0	0	0	0	0	0	0	0	0	0	0	0	0	0	0	0	0	0	0	0	0	0	0	0	0	0	0	0.009878	0	0	0.0024695	0	0	0	0	0	0	0	0	0.089317	0.0223292	0	0	0	0
AAEL002487	20.1226	16.8036	19.005	20.3474	19.0696	23.061	16.8112	20.944	19.2855	20.0254	26.4197	25.2375	27.3657	30.9558	27.4946	47.0976	40.276	27.1379	33.6786	37.0475	45.1848	27.1466	39.0869	33.6566	36.2687	36.0826	37.965	36.6158	32.7216	35.8463	46.1279	27.9645	33.7818	38.8408	36.6787	70.08	34.1677	49.431	49.3496	50.7571	67.811	58.9813	63.8216	62.042	63.164	37.3729	42.3474	47.1357	28.7648
AAEL026103	0.059646	0.018408	0.059177	0.029189	0.041605	0.068099	0	0.088609	0	0.039177	0	0	0	0	0	0	0	0	0.037723	0.00943075	0	0	0	0	0	0	0	0	0	0	0	0	0	0	0	0	0	0.059383	0	0.0148457	0	0.051849	0	0.102045	0.0384735	0.158021	0	0	0.058706
AAEL028041	0	0	0	0	0	0.033365	0	0	0	0.00834125	0	0	0	0	0	0	0	0	0	0	0	0	0	0.1109	0.027725	0	0	0	0	0	0.114224	0.116646	0.16174	0.073038	0.116412	0	0	0.120055	0.266002	0.0965142	0.228043	0	0	0	0.0570107	0	0.141775	0.110408	0.163779
AAEL027733	0.022103	0	0	0	0.00552575	0	0	0	0	0	0	0	0	0.120014	0.0300035	0	0	0	0	0	0	0	0	0	0	0	0	0.024373	0	0.00609325	0.02605	0	0	0	0.0065125	0.024467	0	0	0	0.00611675	0	0	0	0	0	0	0	0	0
AAEL002465	6.21105	7.18739	5.85182	6.7113	6.49039	8.12446	7.23494	8.48886	7.55206	7.85008	5.80819	7.4004	6.79341	8.1021	7.02602	8.18762	9.12053	5.69987	8.56409	7.89303	8.65887	10.1477	10.9969	9.8688	9.91806	6.73425	11.3336	8.28779	7.23039	8.3965	4.74758	8.08295	4.12189	5.27018	5.55565	5.15755	6.99513	4.71925	5.67741	5.63733	7.62195	8.6003	7.71017	9.13794	8.26759	12.3037	13.5643	13.8262	16.6612
AAEL024036	0	0	0	0	0	0	0	0	0	0	0	0	0	0	0	0	0	0	0	0	0	0	0	0	0	0.014732	0	0	0	0.003683	0	0	0	0	0	0	0	0	0	0	0	0	0	0.033319	0.00832975	0	0.021902	0	0
AAEL024570	3.26399	3.32974	2.31212	3.07892	2.99619	3.62941	2.87014	2.79436	2.98552	3.06986	2.76465	2.31453	2.45587	2.26745	2.45063	2.9951	2.588	1.55464	2.10665	2.3111	3.08522	2.62366	2.82626	2.39545	2.73265	2.82923	2.92831	2.77729	2.43195	2.7417	5.00575	4.04529	3.80955	3.5285	4.09727	5.69992	3.895	4.96364	4.48088	4.75986	9.23427	7.4104	8.99514	7.19815	8.20949	11.0907	8.47461	7.92755	6.83874
AAEL002462	1.6213	1.64197	1.80536	0.788174	1.4642	0.986561	1.3864	0.50092	0.709839	0.895931	0.716145	0.88986	0.646142	0.304054	0.63905	0.689483	0.940789	0.494404	0.810826	0.733876	0.722796	0.771504	0.754368	0.704665	0.738333	0.672843	0.557317	0.626991	0.683512	0.635166	0.926309	0.858777	0.820327	0.735315	0.835182	0.632125	0.463828	0.601461	0.848138	0.636388	0.959234	1.52799	1.35816	2.05488	1.47507	2.67859	2.60129	2.85445	2.04496
AAEL019645	2.47609	1.78934	2.6409	2.02594	2.23307	1.83433	1.64491	0.722656	2.02736	1.55732	2.31814	1.63553	1.82319	1.61426	1.84778	2.02487	1.41661	1.39265	1.30363	1.53444	2.02394	1.99589	1.69202	2.05986	1.94293	2.30133	1.65244	2.39029	2.0298	2.09347	2.07149	1.98268	2.81366	2.35067	2.30462	3.15074	2.36177	2.89264	3.12466	2.88245	4.2829	3.52211	4.72765	4.51966	4.26308	5.63065	4.64062	5.97863	4.91115
AAEL019644	4.22227	3.33517	4.02592	3.60836	3.79793	3.64967	3.50406	1.12718	2.02233	2.57581	2.78501	3.31433	3.45992	2.50365	3.01573	2.44011	2.77726	2.42635	2.77976	2.60587	3.51456	2.91942	2.79815	3.15514	3.09682	2.68675	4.0442	3.55399	2.83765	3.28065	4.73209	3.697	2.85649	3.86174	3.78683	5.5308	4.36006	3.52949	5.14545	4.64145	7.99264	6.74861	9.01999	7.28397	7.7613	10.1711	9.73293	9.71096	7.23143
AAEL023280	1.7474	2.287	2.17477	2.07866	2.07196	1.17857	1.50409	0.610075	0.728682	1.00535	1.74036	1.66166	1.47085	1.60583	1.61968	1.02649	1.02807	0.769018	0.913379	0.934239	1.4098	1.0627	0.832858	0.809383	1.02869	1.08333	1.30596	1.10232	1.07356	1.14129	1.28083	1.37387	1.34257	1.05935	1.26415	2.20295	1.81625	1.68182	2.27705	1.99452	3.09987	3.04953	4.4077	2.77094	3.33201	4.64675	4.18368	4.85026	3.80982
AAEL022941	17.9124	18.4699	18.6417	19.6511	18.6688	17.2932	16.025	15.7631	16.6211	16.4256	9.21563	9.32473	9.80499	11.1617	9.87676	12.393	12.8636	10.4326	13.3696	12.2647	12.3203	12.5728	13.1858	13.3925	12.8678	10.6837	13.2924	12.417	11.5155	11.9771	9.21867	11.1671	10.2236	8.582	9.79783	7.42205	9.44162	7.42761	7.81243	8.02593	13.3315	12.8624	14.5528	15.2662	14.0032	23.5225	25.8063	28.9428	27.8222
AAEL002467	417.82	1170.14	307.434	178.642	518.51	1125.62	1022.43	3098.22	1223.27	1617.39	13659.5	11721	13357.4	13361.3	13024.8	13184.5	12441.1	11976.3	11707.1	12327.3	9208.77	11447.1	10877.7	10299	10458.1	6911.73	9015.32	7402.95	6121.13	7362.78	6225.29	8958.43	7570.86	6570.62	7331.3	2996.62	7724.16	3367.77	1185.07	3818.41	894.515	3201.99	1295.87	2326.51	1929.72	562.275	2369.38	1772.63	1066.76
AAEL002481	0.147368	0	0	0	0.036842	0	0.05776	0	0	0.01444	0	0	0	0.050396	0.012599	0	0	0	0	0	0	0	0	0	0	0	0.078522	0	0.0974	0.0439805	0	0.158802	0.040819	0.076793	0.0691035	0.051486	0	0	0	0.0128715	0	0	0	0.191895	0.0479738	0	0	0	0
AAEL021027	0	0	0	0	0	0	0	0.52812	0	0.13203	1.32619	1.54117	1.12628	1.58138	1.39376	1.56126	0.535434	1.05956	0.396403	0.888164	2.10561	0.413344	0	1.03307	0.888006	4.49786	5.62167	3.59931	3.57335	4.32304	6.97552	10.9855	7.35059	10.7218	9.00835	2.65294	11.6591	4.93762	1.00525	5.06372	0.906895	3.83485	1.52903	1.55012	1.95522	0.962552	2.30629	1.49022	2.45527
AAEL015606	0	0	0	0.06283	0.0157075	0	0.158639	0.045587	0	0.0510565	0	0	0	0.036425	0.00910625	0.845992	0	0.222507	0.563878	0.408094	0.302069	0.46011	0.745274	0.722251	0.557426	1.08218	2.00548	1.67593	1.04283	1.4516	2.57222	4.19413	3.78971	3.08693	3.41075	2.50479	3.56028	1.66485	1.09159	2.20538	4.28236	2.35805	1.9068	2.45988	2.75177	0.284291	0.173951	0.23493	0.524403
AAEL021789	0	0.042371	0	0	0.0105927	0	0	0	0	0	0.086269	0.138943	0.153675	0.159393	0.13457	0.064108	0.132268	0.093511	0.060529	0.087604	0.116013	0.053368	0.04739	0	0.0541927	0.029665	0.117832	0.04338	0.072671	0.065887	0.043722	0.029866	0.117355	0.022906	0.0534623	0.023868	0.065253	0.056218	0.024668	0.0425017	0	0.07974	0.034251	0.068602	0.0456482	0	0.10073	0.024076	0
AAEL004798	13972.5	16865.9	11596.6	12846.8	13820.5	15009.9	15283.5	13221.4	15778.2	14823.2	10473.7	12411	10140.9	11768.5	11198.5	10338.1	10628	10111.7	9716.18	10198.5	9844.42	11216.1	9300.76	9068.01	9857.33	7894.27	11155.3	8204.36	7864.44	8779.59	11251.7	11724.9	9748.66	9632.93	10589.5	8451.34	12820.1	9027.03	5911.19	9052.42	6205.83	11951.8	6161.54	4979.17	7324.58	14480	13672.6	10123.7	11783.7
AAEL008620	1.84743	1.82863	0.883696	1.91763	1.61935	0.028073	0.23657	0.30804	1.30227	0.468739	0.253517	0.483544	0.217322	0.824681	0.444766	0.341325	0.210201	0	0.441968	0.248373	0	0.624692	0.663423	0.840123	0.532059	1.21958	0.551685	1.63983	1.30584	1.17924	1.16258	1.00468	0.620493	1.71225	1.125	0.647312	1.04106	0.214483	0.317718	0.555144	1.99563	1.27273	1.3459	2.32241	1.73417	0	0.227292	0.197856	0.404687
AAEL028838	0.024856	0.003353	0.150813	0	0.0447555	0.061889	0	0	0	0.0154722	0	0	0.074906	0	0.0187265	0	0	0.123079	0	0.0307697	0	0	0	0	0	0	0.082039	0	0.020079	0.0255295	0.367947	0.233617	0.179385	0.151829	0.233194	0.165544	0.295565	0	0	0.115277	0.182051	0	0	0.206434	0.0971212	0.022163	0.164063	0.194891	0.282267
AAEL028792	0	0.034517	0	0	0.00862925	0	0	0	0.132862	0.0332155	0	0	0.04917	0	0.0122925	0	0	0.062982	0.056425	0.0298517	0	0	0.024938	0	0.0062345	0	0	0.252666	0	0.0631665	0	0.180666	0.031774	0	0.05311	0.053357	0.103253	0	0.098961	0.0638927	0.122199	0.139172	0	0	0.0653428	0	0	0.073679	0.657529
AAEL011500	51.2382	76.4711	43.3573	44.887	53.9884	67.6733	61.1979	45.0196	57.3573	57.812	50.2465	44.963	43.0834	49.5573	46.9625	60.3566	57.8391	44.8374	64.2778	56.8277	68.8451	94.6517	77.9218	82.2317	80.9126	79.975	106.909	89.1325	106.359	95.5937	98.8634	112.227	92.4896	89.903	98.3708	89.4203	108.897	88.9532	80.533	91.9509	87.3737	114.309	88.4542	93.6818	95.9545	104.463	127.137	109.056	93.9567
AAEL011505	5.40502	5.73027	4.43827	5.18884	5.1906	6.91706	5.04244	4.89257	5.34361	5.54892	5.383	6.21803	5.71923	5.65541	5.74392	8.74563	9.47042	5.26697	7.13148	7.65362	7.68779	8.94488	8.24201	7.10715	7.99546	5.31023	7.7775	6.67043	4.63155	6.09743	2.76718	4.58294	3.11072	3.17884	3.40992	2.50697	4.10809	2.73554	1.96979	2.8301	3.25718	4.63548	3.55	5.56962	4.25307	14.9061	14.2241	14.5202	20.7367
AAEL011502	6.38874	6.47806	5.57858	5.24358	5.92224	6.8672	5.76647	6.60734	5.98489	6.30647	5.99491	8.31971	7.65761	8.11457	7.5217	6.89283	7.04266	6.11538	6.79113	6.7105	6.59794	6.57185	5.3827	5.1761	5.93215	4.03171	5.96315	4.46589	4.20703	4.66695	4.83327	5.43351	4.19996	4.13945	4.65155	5.45994	6.15709	5.72822	5.29266	5.65948	8.64041	7.71002	9.51899	10.626	9.12385	15.0048	13.6032	16.0292	16.1164
AAEL011506	0.166023	0.107649	0.157048	0	0.10768	0.104276	0	0.01147	0	0.0289365	0.051642	0.094809	0.051749	0.039308	0.059377	0.054863	0.013629	0.033224	0.078839	0.0451387	0.04171	0.038697	0.078127	0.037736	0.0490675	0.137037	0.150995	0.17109	0.31518	0.193576	0.138806	0.19545	0.078191	0.232243	0.161172	0.072752	0.092334	0.133099	0.32684	0.156256	0.500658	0.212473	0.333591	0.341558	0.34707	0.32569	0.10933	0.288299	0.282728
AAEL007729	13.7841	13.448	10.3307	12.2628	12.4564	17.3102	12.7781	13.1738	13.7792	14.2603	6.03186	7.85203	10.1007	8.18718	8.04294	3.60754	4.12064	4.0139	4.21554	3.9894	4.3396	7.21069	3.62716	3.91916	4.77415	9.24667	10.5155	7.9735	7.07862	8.70356	7.57192	8.76526	7.42735	6.03357	7.44952	6.15445	8.84966	6.20547	4.8069	6.50412	7.42033	8.95577	8.17547	9.62857	8.54504	9.38549	16.287	12.127	12.9732
AAEL012539	2.17701	2.03832	2.12701	2.08273	2.10627	2.38095	2.01862	2.1926	2.1586	2.18769	1.90401	1.55379	2.03208	1.67697	1.79171	1.12702	0.814492	0.477728	0.734954	0.788549	1.61478	1.45707	1.30052	1.18968	1.39051	1.68425	2.02663	1.49343	1.62961	1.70848	2.39985	1.86574	1.97319	2.03051	2.06732	2.38939	2.09312	2.16752	2.3866	2.25916	4.26788	2.9005	3.86243	4.37856	3.85234	5.94506	6.70576	6.01199	5.05856
AAEL012538	0.401096	0.26397	0.375681	0	0.260187	0	0	0	0.068917	0.0172292	0	0	0	0.102787	0.0256967	0	0	0.052237	0.089544	0.0354452	0	0.2739	0.47436	0.148428	0.224172	0.327605	0.221916	0.498148	0.373104	0.355193	0.572108	0.353765	0.229331	0.254682	0.352471	0.131218	0.107837	0	0.408473	0.161882	0.340186	0.560652	1.13605	0.366367	0.600813	0.201344	0	0.633159	0
AAEL024482	0.645366	0.299876	0.303795	0.407305	0.414085	0.046381	0.462395	0.217238	0.120021	0.211509	0	0.145078	0.105604	0.264479	0.12879	0	0	0	0	0	0	0.256264	0	0.291535	0.13695	0.067158	0.307319	0.392731	0	0.191802	0	0.10594	0.054462	0.187161	0.0868908	0	0.097672	0	0	0.024418	1.02381	0.539704	0.597939	0.62638	0.696959	0.175325	0.160557	0.742025	0.7591
AAEL027976	0	0	0	0	0	0	0	0	0	0	0	0	0	0	0	0	0	0	0	0	0	0	0	0	0	0	0	0	0	0	0	0	0	0	0	0	0	0.078642	0	0.0196605	0	0	0	0	0	0	0	0	0
AAEL013565	1.85879	1.9872	1.816	1.39133	1.76333	2.79256	1.78715	1.96434	2.14995	2.1735	2.40088	1.9765	1.30458	2.2602	1.98554	1.65788	1.81616	0.877528	1.16823	1.37995	1.21975	2.37215	0.862192	1.08278	1.38422	1.41581	2.06625	1.45532	1.3119	1.56232	2.21889	1.97087	1.68238	2.17716	2.01233	1.53659	1.4832	1.27747	1.18674	1.371	2.59576	1.96613	2.05856	2.11643	2.18422	3.64795	3.88395	3.52567	4.15588
AAEL016816	0	0	0	0	0	0	0	0	0	0	0	0	0	0	0	0	0	0	0	0	0	0	0	0	0	0	0	0	0	0	0	0	0	0	0	0	0	0	0	0	0	0	0	0	0	1.29039	0	0	0
AAEL022144	0.362563	0.168302	0.162984	0	0.173462	0.203008	0	0.097667	0	0.0751687	0	0	0.451665	0.029741	0.120352	0	0	0	0.099782	0.0249455	0	0.058427	0.357206	0.082427	0.124515	0.63061	0.269675	0.204059	0.057289	0.290408	0	0.588421	0.284023	0.322418	0.298716	0.528268	0.410671	0.192908	0.095155	0.30675	0.214109	0.454018	0.132568	0.306273	0.276742	0.736185	0.258971	0.205469	0.302641
AAEL012536	11.7046	9.12124	10.1022	11.3713	10.5748	9.38419	8.88342	11.6475	14.5866	11.1254	3.51649	3.90086	5.26631	2.56234	3.8115	1.6654	2.10461	1.23905	1.94248	1.73789	1.431	2.68985	1.26015	1.35799	1.68475	2.31687	2.62957	1.18754	3.73255	2.46663	6.49928	3.93006	4.20982	4.9354	4.89364	6.09155	6.12514	4.37503	7.61464	6.05159	15.9803	8.93644	14.1087	19.0062	14.5079	17.318	13.9988	15.3588	18.7877
AAEL019731	12.9395	11.3638	6.54519	10.9231	10.4429	13.8442	9.11758	11.1355	10.2907	11.097	12.6525	9.90262	4.73613	11.4769	9.69204	15.2381	10.6824	5.73537	8.94317	10.1498	14.2596	7.70528	13.2308	15.5591	12.6887	7.21458	16.9028	12.707	13.5289	12.5883	28.4151	17.8338	18.337	20.3961	21.2455	27.0619	8.1654	23.1956	22.1975	20.1551	35.0514	23.6929	30.6041	32.1037	30.363	36.0825	15.9638	25.912	22.716
AAEL013563	0	0	0	0	0	0	0	0	0	0	0	0	0	0	0	0	0	0	0	0	0	0	0	0	0	0	0	0	0	0	0	0	0	0	0	0	0	0	0	0	0	0	0	0	0	0	0	0.00091	0
AAEL017104	0	0	0	0	0	0	0	0	0	0	0	0	0	0	0	0	0	0	0	0	0	0	0	0	0	0	0	0	0.033415	0.00835375	0.089994	0	0	0	0.0224985	0	0	0	0	0	0	0	0	0.01469	0.0036725	0	0	0.010076	0
AAEL018913	0	0	0	0	0	0	0	0	0	0	0	0	0	0	0	0.094726	0.483842	0	0.654452	0.308255	0	0	0	0	0	0	0	0	0	0	0	0	0	0	0	0	0	0	0	0	0	0	0	1.05843	0.264607	0	0.433021	0.48527	0
AAEL006718	20.2989	21.6101	17.5061	20.3342	19.9373	19.7316	21.2191	20.2864	21.0825	20.5799	15.6805	18.5372	18.0931	21.6579	18.4921	21.076	21.3325	19.9789	24.6551	21.7606	27.009	24.3936	27.624	34.9007	28.4818	26.4046	28.5169	29.2505	30.4307	28.6507	12.5653	17.9037	11.0455	11.8146	13.3323	6.48589	9.87619	8.26794	7.91544	8.13636	11.3736	11.6834	16.2494	19.1974	14.6259	38.163	22.6506	35.0641	31.663
AAEL006731	8.01984	7.14927	6.44287	6.13288	6.93622	7.28761	6.07677	6.97269	6.35894	6.674	4.71344	4.18088	4.67538	4.5395	4.5273	5.00712	7.17131	7.7429	7.10703	6.75709	5.7695	7.80325	7.63992	5.8132	6.75647	6.12232	4.70385	3.88974	1.90864	4.15614	2.72228	4.79935	2.73958	2.93432	3.29888	4.31978	5.5658	4.00287	5.41258	4.82526	8.96361	8.12745	14.0857	12.6861	10.9657	24.1763	17.6635	22.0291	17.8539
AAEL006734	14.2654	17.2981	13.213	15.9557	15.1831	16.0461	16.6961	16.1042	13.6398	15.6216	15.1947	18.5502	15.6658	18.9074	17.0795	18.6842	19.9557	22.2565	23.7331	21.1574	22.4268	20.8979	23.1002	24.9952	22.855	12.3659	15.6546	14.4405	8.86718	12.8321	6.23815	10.5839	6.60247	6.21129	7.40895	5.57321	8.19311	5.31471	5.63549	6.17913	10.8245	9.87812	13.0083	12.2251	11.484	31.5966	27.3057	28.0669	33.3007
AAEL006733	5.75502	5.98494	5.67318	5.3616	5.69368	6.21007	5.92423	4.36057	5.18536	5.42006	5.43725	5.65544	4.91007	5.26639	5.31729	6.05163	6.75538	6.41223	6.24925	6.36712	7.3612	7.34468	6.66216	7.6445	7.25314	8.7538	8.70195	7.91236	8.32379	8.42297	8.62226	8.06002	6.77047	6.50445	7.4893	8.00468	8.2963	7.59078	7.43712	7.83222	9.95605	9.15885	10.3816	10.6494	10.0365	14.2666	12.3579	17.3791	13.0874
AAEL026335	0	0	0	0	0	0	0	0	0	0	0	0	0	0	0	0	0	0	0	0	0	0	0	0	0	0	0	0	0	0	0	0	0	0	0	0	0	0	0	0	0	0	0	0	0	0	0.150976	0	0
AAEL006727	46.3724	45.8455	39.8672	45.5442	44.4073	44.8176	42.732	44.8124	44.5095	44.2179	66.1795	67.9747	73.2942	60.8747	67.0808	58.5411	54.7048	78.7999	48.1418	60.0469	48.2694	55.0596	56.8663	38.6382	49.7084	20.0102	31.0593	24.219	18.806	23.5236	11.5717	14.2256	10.2996	10.4629	11.64	10.7008	15.2579	10.7801	10.8843	11.9058	19.9959	16.112	24.1689	26.33	21.6517	65.8371	55.073	78.7545	80.9292
AAEL006740	3.58847	5.85918	2.89403	3.68412	4.00645	4.8873	6.23948	3.56472	4.16093	4.71311	2.183	3.86481	3.82349	3.35321	3.30613	1.81717	3.70068	2.49739	2.89646	2.72792	4.08607	5.09873	3.50419	4.17025	4.21481	3.18015	5.71879	4.17388	2.86782	3.98516	6.00035	7.30426	6.05659	6.59376	6.48874	7.18022	7.49148	7.90132	7.25052	7.45588	10.524	11.8889	10.1635	12.2653	11.2104	11.1669	18.3804	14.4574	13.1918
AAEL006747	3.17099	2.83505	3.6743	3.51763	3.29949	3.38863	3.02761	4.21076	3.42849	3.51387	3.28811	1.80174	3.09817	2.73675	2.7312	2.41726	2.57838	2.09625	1.92485	2.25419	2.35978	2.06843	2.10306	1.69018	2.05536	1.62327	1.89998	2.47864	2.06963	2.01788	2.93587	2.52075	2.00214	1.87283	2.3329	3.85574	2.55892	2.60557	3.25246	3.06817	5.58932	3.95824	5.80285	5.35545	5.17646	8.00261	6.27477	9.15053	6.48961
AAEL006754	10.433	22.4869	7.77006	9.22065	12.4776	16.0377	12.3113	8.65147	9.95705	11.7394	5.67548	7.26198	4.51549	6.17894	5.90797	7.20246	7.78537	3.59125	4.42005	5.74978	6.28566	16.3927	5.90129	7.57253	9.03806	12.7852	25.0709	11.0759	10.8311	14.9408	11.9261	19.7947	12.2487	11.3517	13.8303	11.9883	24.9372	13.8496	11.4132	15.5471	20.3585	36.3716	22.3231	27.6117	26.6662	54.9083	71.5898	45.9481	61.7489
AAEL006735	8.51965	8.60485	5.43949	7.87226	7.60906	5.6998	7.19157	4.62599	5.81893	5.83407	3.88393	3.90004	4.45859	5.85275	4.52382	6.08423	5.05616	4.56802	4.65303	5.09036	4.57498	4.98167	6.20713	4.72276	5.12163	4.62908	7.00469	5.24011	6.08053	5.7386	9.48885	9.00884	8.17965	7.7476	8.60623	10.0304	10.9399	8.98868	11.4427	10.3504	21.0066	17.441	22.6939	20.2574	20.3497	31.3074	24.6525	22.2266	26.0743
AAEL006752	12.1334	13.0996	10.9968	12.1422	12.093	11.6029	11.5593	10.987	11.8017	11.4877	5.65343	7.30233	6.10537	4.34454	5.85142	8.01335	9.84926	5.4084	8.60176	7.96819	7.75648	9.929	10.4984	8.39026	9.14353	8.89354	12.1491	7.80124	11.7515	10.1488	16.0264	13.3816	15.4165	14.9131	14.9344	15.7924	12.5147	14.0778	16.1432	14.632	18.1212	17.449	19.9604	16.1353	17.9165	18.3432	17.8515	16.8129	16.8099
AAEL019478	1.15776	0.684622	0.670098	0.785723	0.82455	0.948854	0.903558	0.815568	0.861933	0.882478	0.940808	0.905335	0.602536	0.855798	0.826119	1.11585	0.752525	0.380446	1.03124	0.820016	1.43081	1.29977	0.921122	0.71763	1.09233	0.792594	0.984021	0.451722	0.734761	0.740774	1.03038	0.581546	0.559514	0.628311	0.699938	0.740753	0.545142	0.724823	0.47442	0.621284	1.41589	0.975456	0.862228	0.905806	1.03985	1.69966	1.5009	1.19528	1.34827
AAEL027871	0	0.020435	0	0	0.00510875	0.005105	0.019086	0	0.006605	0.007699	0	0	0.040281	0	0.0100702	0.006894	0.009569	0.059654	0	0.0190292	0.034447	0.025073	0.019114	0.013844	0.0231195	0.04082	0.021142	0	0.023244	0.0213015	0.025736	0.035975	0.032947	0	0.0236645	0.024819	0.035737	0.012454	0.021537	0.0236367	0.014958	0	0.043602	0	0.01464	0.057036	0.058761	0.054131	0.029295
AAEL020468	0	0.070044	0.072408	0.064116	0.051642	0.028682	0.041619	0.045052	0.043925	0.0398195	0.03081	0	0.027398	0.017043	0.0188127	0.020912	0.032073	0.018858	0.040219	0.0280155	0.063524	0.011748	0	0	0.018818	0.063035	0.044018	0.205783	0.062375	0.0938028	0.036407	0.056336	0.118083	0.046747	0.0643932	0.10135	0.039685	0.093189	0	0.058556	0.025719	0.05137	0.05555	0.035879	0.0421295	0.027206	0.116818	0.021449	0.035741
AAEL024478	0.313809	0.304312	0.090726	0.323002	0.257962	0.281705	0.243962	0.47683	0.239826	0.310581	0.226195	0.278266	0.218493	0.425988	0.287235	0.459427	0.216762	0.090647	0.144638	0.227869	0.55585	0.375764	0.302897	0.297821	0.383083	0.120171	0.438564	0.15169	0.086416	0.19921	0.165475	0.237835	0.329119	0.34544	0.269467	0.363074	0.095837	0.352553	0.248363	0.264957	0.321783	0.672337	0.445603	0.487205	0.481732	0.761797	0.554732	0.444057	0.24491
AAEL019410	20.174	25.1614	13.2818	17.7941	19.1028	20.6399	14.8491	16.7584	14.45	16.6744	30.999	32.0613	37.3446	35.3954	33.9501	33.5263	32.5839	40.7375	29.4095	34.0643	28.8788	34.1201	39.59	26.2961	32.2213	22.5899	27.9265	17.7732	21.7995	22.5223	16.9257	12.7813	10.764	20.4009	15.218	9.54093	12.699	10.1476	7.24973	9.90931	14.8691	13.5094	20.9337	22.9602	18.0681	52.2052	58.5747	56.5497	71.4398
AAEL019442	3.46351	7.53007	6.54456	6.45713	5.99882	5.8832	7.07605	7.12051	11.1295	7.80233	7.57692	6.72653	3.75278	8.33851	6.59868	14.3434	17.1354	10.4727	13.819	13.9426	8.43942	15.4042	7.07436	17.3803	12.0746	6.823	11.0349	15.9458	8.14391	10.4869	8.03667	19.1305	15.9478	6.67712	12.448	21.0606	20.2574	21.7662	23.7198	21.701	30.4202	27.0657	27.7159	31.795	29.2492	17.7249	19.2103	19.8701	18.1496
AAEL006755	5.05725	6.17762	4.18949	7.07933	5.62592	6.27736	5.16082	7.56359	5.97122	6.24325	3.91722	5.18137	4.87813	4.27089	4.5619	3.6487	3.90958	5.32471	3.61434	4.12433	2.9269	4.7819	4.37966	5.41593	4.3761	5.06945	4.98921	5.95795	5.24538	5.3155	5.60766	5.49629	6.37197	7.30701	6.19573	9.22409	6.61507	6.62689	8.35225	7.70457	12.5295	9.15796	14.7044	11.097	11.8722	18.5322	13.5147	14.7869	13.1603
AAEL006723	0.592846	2.23621	0.423025	0.441649	0.923433	1.19606	1.34339	0.66911	0.584536	0.948276	1.13623	1.06386	2.02155	1.32854	1.38754	0.747841	0.613549	0.872113	0.723796	0.739325	0.823787	1.64004	0.78151	0.504293	0.937407	0.506585	1.64311	0.408068	0.381413	0.734795	0.4112	2.10834	0.490569	0.556394	0.891626	2.79972	2.11337	0.848778	0.661537	1.60585	2.18928	5.26883	2.69635	2.05819	3.05316	6.8544	13.5459	2.42526	3.97011
AAEL006751	42.6138	44.6983	40.684	42.367	42.5908	42.9351	45.2557	36.8957	41.6074	41.6735	34.1683	32.6192	31.3274	34.9679	33.2707	31.1343	29.464	27.2153	28.348	29.0404	26.3313	29.8229	28.1994	25.9834	27.5843	24.1059	28.8426	23.3158	21.2287	24.3732	31.9855	29.4462	27.0501	28.0824	29.141	35.0952	32.8219	33.7032	34.5571	34.0443	62.062	47.8004	59.7482	63.4635	58.2685	96.7876	88.1415	92.448	90.8467
AAEL006741	130.202	146.808	121.095	138.934	134.26	141.95	129.453	128.03	123.611	130.761	86.9452	102.378	94.5605	96.4666	95.0875	80.777	81.4808	73.1821	73.1131	77.1383	66.9438	84.6347	76.9954	69.8082	74.5955	57.5781	87.8094	62.0902	60.6597	67.0343	84.5881	85.2857	73.5931	76.4081	79.9688	104.082	104.012	94.5424	97.7594	100.099	144.161	128.278	161.131	162.204	148.944	255.742	265.73	256.801	258.3
AAEL006744	23.5933	35.2163	25.2415	24.2475	27.0746	30.8237	27.1854	25.4667	26.5492	27.5062	27.4303	32.5917	32.3066	29.4608	30.4473	21.2703	23.3426	22.1237	18.1706	21.2268	16.4659	26.417	14.6669	12.2207	17.4426	15.3493	32.2754	14.3159	13.4608	18.8503	20.192	23.4431	17.7753	16.5663	19.4942	23.3724	29.5807	20.9202	23.4773	24.3376	38.1352	44.114	35.899	44.4932	40.6603	63.3935	91.9114	62.3932	79.2889
AAEL006725	16.1932	16.9375	14.3368	15.1289	15.6491	17.3622	16.2747	15.7702	14.7006	16.0269	19.1151	21.7909	20.9147	22.2395	21.0151	20.4087	21.7401	20.5736	20.5453	20.8169	17.0181	21.5172	18.7122	16.2729	18.3801	13.308	19.5568	12.8744	12.1939	14.4833	10.8279	14.2241	10.1416	10.865	11.5146	10.987	13.8621	9.35932	10.4016	11.1525	16.512	18.5441	18.306	20.1173	18.3699	33.8547	37.8501	33.797	41.4173
AAEL006724	5.137	4.92782	4.11208	4.05833	4.55881	5.62252	5.32592	4.42425	4.07911	4.86295	5.69857	4.61886	7.08631	8.54185	6.4864	6.00889	5.2291	5.75656	6.14063	5.7838	6.30998	5.75794	5.5734	4.99598	5.65932	3.6076	4.48235	3.40254	2.7633	3.56395	2.96835	4.50471	3.43293	2.76668	3.41817	3.81486	4.27193	2.91429	3.68098	3.67051	5.33025	4.68617	5.73141	5.18508	5.23323	9.34847	7.95761	9.60774	10.7291
AAEL006750	0.844023	0.926472	0.610708	0.750253	0.782864	1.18509	1.27818	0.598607	0.557534	0.904851	1.20188	1.92355	0.795403	2.25419	1.54375	1.26513	0.874964	0.891288	0.559337	0.897679	0.662791	0.844245	1.07475	0.956239	0.884505	1.57583	0.939279	1.2721	0.941528	1.18219	1.0395	0.856384	0.644157	1.16711	0.926786	0.755958	0.557345	0.803385	0.659992	0.69417	0.962246	1.59848	1.73348	1.60807	1.47557	2.64555	3.20567	2.87518	3.04224
AAEL006728	12.5629	14.1412	11.3908	10.7553	12.2125	15.0403	10.6096	13.717	12.363	12.9325	14.4697	11.4444	12.8386	13.5069	13.0649	14.9058	13.2589	11.3442	12.3226	12.9579	16.8781	14.8992	15.1608	16.7643	15.9256	14.4643	17.2695	16.5191	11.9725	15.0564	16.9935	15.5986	15.783	16.235	16.1525	22.705	19.7551	18.2221	17.4224	19.5261	29.7584	24.052	31.2508	26.6418	27.9257	37.2462	34.5227	33.365	35.4484
AAEL020676	0	0.087058	0	0	0.0217645	0	0	0	0	0	0	0	0	0	0	0.23873	0	0	0	0.0596825	0	0	0	0	0	0	0	0	0	0	0	0	0	0	0	0	0	0	0	0	0	0	0	0	0	0	0	0	0
AAEL006721	51.099	56.7412	47.9359	50.2087	51.4962	57.7104	52.7852	54.8913	48.8673	53.5635	32.4869	44.8499	51.5166	39.6381	42.1229	35.1206	33.7547	24.5524	24.8644	29.573	30.063	42.249	38.4024	29.2467	34.9903	22.5147	36.2838	23.2476	20.9639	25.7525	15.8451	24.096	15.8482	14.2404	17.5074	13.2073	22.5212	13.5384	12.7607	15.5069	25.2056	34.0159	31.9957	39.6312	32.7121	74.5935	70.2077	69.5167	96.4414
AAEL006748	27.8169	31.4354	21.95	21.3608	25.6408	27.7322	23.3608	20.7589	25.9556	24.4519	35.9318	31.5706	32.2805	38.2098	34.4982	40.1503	39.3896	39.146	32.2628	37.7372	31.3893	35.509	36.223	32.52	33.9103	21.3299	22.3571	23.311	18.0449	21.2607	16.8698	19.01	14.8565	14.8262	16.3906	18.3446	22.8117	15.5232	16.3622	18.2604	28.1333	24.1517	30.2641	32.296	28.7113	65.049	55.273	63.5058	72.4466
AAEL006717	9.05865	10.301	9.33234	9.07139	9.44084	9.53905	9.69115	10.0763	10.2372	9.88593	9.64342	10.6191	9.59383	11.4651	10.3304	15.7703	15.4494	12.2014	16.3683	14.9474	18.0113	18.2969	16.805	19.9474	18.2651	17.9769	19.4135	17.6196	15.4813	17.6228	12.1176	13.9355	10.9501	13.1257	12.5322	10.9357	12.4696	11.5423	13.397	12.0862	14.9276	15.7952	16.9902	18.7079	16.6052	24.74	23.0809	23.1182	25.0438
AAEL027339	0.185762	0.593407	1.68807	0.493721	0.740241	1.26553	0.797655	0.526329	1.32685	0.97909	0.466236	0.591952	0.189793	0.489431	0.434353	0.113959	0.311616	0.203334	0.173104	0.200503	0.63018	0.320193	0.120275	0.099843	0.292623	0.202851	0.191981	0.298982	0	0.173453	0.436209	0.396525	0.282674	0	0.278852	0.147465	0.967647	0.691345	0.592414	0.599718	1.26841	2.63098	2.1105	1.44806	1.86449	1.20875	0.941038	1.12481	0.985442
AAEL003087	2.52885	4.21005	3.08154	3.01836	3.2097	3.79173	3.3081	3.58977	2.74296	3.35814	3.09951	2.83913	2.7509	3.1779	2.96686	3.4901	2.52783	3.65481	3.92329	3.39901	2.39245	4.32139	2.82476	3.20093	3.18488	3.57204	3.25332	3.03041	2.68807	3.13596	2.66656	2.94238	2.61519	2.68007	2.72605	3.29098	3.29356	2.59463	2.54437	2.93088	4.86312	4.66939	5.86581	6.98423	5.59564	13.08	10.9536	10.2272	12.252
AAEL003070	3.50648	4.62526	3.10955	2.95985	3.55028	3.51939	3.52173	2.77478	2.62742	3.11083	7.59285	9.8008	8.24743	9.63757	8.81966	8.58101	10.204	9.89611	9.14948	9.45764	4.55234	5.09986	3.99532	1.7168	3.84108	1.45958	3.31359	1.32467	0.812389	1.72756	0.276919	1.56357	0.27044	0.361722	0.618163	0.51044	1.54866	0.551235	0.6262	0.809133	1.70234	2.14242	1.76989	2.34553	1.99005	10.2822	9.55198	12.3119	13.2071
AAEL014768	41.6653	38.6505	40.489	43.9593	41.191	39.1041	37.4192	36.2762	34.5943	36.8484	5.25277	5.33364	5.87802	4.45909	5.23088	4.6506	3.44788	2.65149	3.3122	3.51554	3.74135	6.4748	2.98691	1.87434	3.76935	9.5032	5.93311	6.26817	12.4129	8.52935	28.1522	20.8391	23.366	22.4347	23.698	40.4778	27.4949	32.9583	38.1852	34.7791	129.51	87.5846	140.233	127.731	121.265	185.763	125.574	160.172	131.603
AAEL001682	7.94402	12.8087	9.92867	9.36687	10.0121	11.1227	9.7623	9.52051	10.0093	10.1037	14.5049	18.0495	15.5854	14.7535	15.7233	14.9945	18.4363	18.6878	17.5092	17.407	13.9616	14.3664	18.4622	15.3446	15.5337	8.60283	13.8719	12.0114	9.62249	11.0272	8.33219	9.36789	6.96479	6.69121	7.83902	7.37736	10.2013	6.13443	6.47073	7.54595	11.3096	12.243	12.1309	13.6593	12.3357	32.8089	27.0859	30.3966	37.876
AAEL001680	0.040537	0.049047	0.055013	0	0.0361493	0.0284	0	0	0	0.0071	0	0	0.032276	0	0.008069	0.057851	0.042873	0	0	0.025181	0	0	0.042746	0	0.0106865	0	0	0	0	0	0	0	0	0	0	0	0	0	0	0	0.037299	0	0.023172	0	0.0151177	0.081327	0	0	0.034499
AAEL001705	20.6408	25.6062	21.4175	25.2918	23.2391	23.0571	25.1754	23.5271	21.2701	23.2574	31.421	31.4954	31.7038	38.5969	33.3043	46.6418	56.5252	48.8219	60.6152	53.151	56.2513	48.2539	56.4036	56.7927	54.4254	37.7033	32.9587	35.4386	39.4271	36.3819	37.0102	36.1104	35.4882	38.9834	36.898	36.7194	34.0408	35.4483	36.0416	35.5625	41.602	35.4008	38.1948	36.0213	37.8047	31.9476	34.2874	36.073	30.491
AAEL001683	0.086553	0.070049	0	0.077608	0.0585525	0	0	0	0.077928	0.019482	0	0	0	0	0	0	0	0	0.181481	0.0453703	0	0	0	0	0	0	0	0	0.168756	0.042189	0	0	0	0	0	0	0	0	0	0	0	0	0	0	0	0.115765	0	0	0
AAEL020884	0.024798	0.010563	0	0	0.00884025	0	0	0	0	0	0	0	0	0	0	0	0	0	0	0	0	0	0	0.009289	0.00232225	0	0.015369	0.044937	0.051757	0.0280157	0.100318	0	0	0.010202	0.02763	0	0.022529	0	0	0.00563225	0	0.013001	0	0.144652	0.0394132	0.017457	0	0.029952	0.011531
AAEL024572	0	0.008309	0	0	0.00207725	0	0	0	0	0	0	0	0	0	0	0	0	0	0	0	0	0	0	0	0	0	0	0.027915	0	0.00697875	0	0	0	0	0	0	0.023628	0	0	0.005907	0	0	0	0.04111	0.0102775	0.018309	0	0.031414	0.012259
AAEL022409	0.176142	0	0	0.53848	0.178655	0	0	0	0	0	0	0.240581	0.160331	0	0.100228	0	0	0	0.420335	0.105084	0	0	0	0	0	0	0	0.177665	0.176394	0.0885148	0	0.101786	0	0	0.0254465	0	0.073199	0	0	0.0182998	0.082268	0	0	0	0.020567	0	0	0.30334	0.198191
AAEL022350	0.455587	0.385999	0.554416	0.779553	0.543889	0.878012	0.924661	1.6048	0.265313	0.918197	0.443263	0.436102	0.179469	0	0.264709	0.360155	0	0.261549	0.642246	0.315987	0.595997	0	0.720694	0.459127	0.443954	0.701948	0.279119	0.321974	0.378604	0.420411	0.469372	1.71612	1.06021	0.51845	0.94104	1.18057	0.518609	0.97073	0.651839	0.830438	0.841209	0.730986	1.23461	0.46111	0.816979	1.26687	1.0027	1.27279	0.688032
AAEL019836	0.310196	0.154223	0	0.20862	0.16826	0.433639	0.247215	0.187818	0.115896	0.246142	0.210193	0	0.300846	0.196477	0.176879	0.356319	0.332189	0.236772	0.197513	0.280698	0.161721	0.265136	0.155114	0.426104	0.252019	0.582675	0.615764	0.631829	0.64404	0.618577	0.593552	0.306608	0.189497	0.536399	0.406514	0.449465	0.441434	0.400236	0.479734	0.442717	0.609279	0.376482	0.273017	0.556685	0.453866	0.506937	0.228474	0.320423	0.270397
AAEL001687	0.595011	0.885927	0.521809	0.926236	0.732246	1.35108	1.22838	1.27286	0.611894	1.11605	0.348008	0.978607	0.105935	0.305517	0.434517	0.186468	0.770784	0.670549	0.448159	0.51899	0.711171	1.341	0.83423	1.16758	1.01349	6.47647	4.02601	5.36344	9.04386	6.22744	27.424	16.8835	28.0352	25.9373	24.57	81.0323	38.3391	60.9133	96.9864	69.3178	126.208	87.0584	114.204	98.3541	106.456	36.7846	48.4419	30.8189	26.4949
AAEL001697	0.034877	0	0	0	0.00871925	0	0	0	0	0	0	0	0	0	0	0	0	0	0	0	0	0	0	0.026205	0.00655125	0.158686	0.064885	0	0.067816	0.0728468	0.715321	0.271645	0.146473	0.251063	0.346125	0.278628	0.340266	0.13045	0.528019	0.319341	1.33309	0.761125	0.970175	0.787468	0.962966	0.47575	0.716267	0.730623	0.339416
AAEL001691	0.349367	0.252362	0.507332	0.185254	0.323579	0.249308	0	0.136339	0.351706	0.184338	0.231631	0.139033	0.168224	0.117708	0.164149	0.254109	0.397693	0.087329	0.129147	0.217069	0.359454	0.126591	0.21819	0.378208	0.270611	0.969541	0.765178	0.813414	0.542582	0.772679	2.55321	1.70416	2.54466	2.10522	2.22681	7.00756	2.28248	5.12556	8.90193	5.82938	11.7638	10.2062	10.4673	10.5398	10.7443	4.70437	3.73146	4.93835	3.31567
AAEL001699	8.74303	8.68451	9.32691	10.4191	9.29339	9.0962	11.6617	11.1825	9.42696	10.3419	12.5897	13.2586	10.1505	21.0558	14.2637	62.4768	59.311	47.6222	54.5942	56.001	83.562	70.8977	103.476	105.549	90.871	65.0801	63.1584	92.8303	66.0963	71.7913	90.0679	60.2218	84.9828	82.7615	79.5085	98.0411	55.3216	97.9641	102.386	88.4281	95.8413	70.3107	83.392	77.309	81.7132	30.0515	32.7205	38.3156	23.4601
AAEL001698	33.2771	48.8388	27.2271	29.4622	34.7013	45.0606	33.5921	38.2874	34.1946	37.7837	48.465	43.4936	38.7787	43.2385	43.4939	50.5699	36.825	34.6312	35.392	39.3545	38.7562	46.8719	38.7134	41.1068	41.3621	75.1113	69.2053	72.1615	75.3303	72.9521	77.1804	86.9702	84.0989	78.0735	81.5807	77.9597	82.8075	75.3996	64.541	75.1769	95.8614	94.5095	87.9972	97.2985	93.9166	115.927	102.359	97.0264	94.5315
AAEL017161	12.2066	16.3207	10.1368	9.83959	12.1259	13.7897	14.1253	10.3221	15.1842	13.3553	22.0278	19.2752	17.5424	17.5095	19.0887	21.5511	22.2044	23.0227	26.9771	23.4388	16.498	27.0641	22.5122	21.7374	21.9529	19.0444	25.2116	24.8336	20.6892	22.4447	9.61704	19.2098	10.9494	10.6672	12.6109	10.4016	12.991	8.83523	9.83046	10.5146	12.9839	14.9805	15.2848	12.4956	13.9362	27.7185	23.4729	25.2218	36.9615
AAEL024325	0.205562	0.077637	0.226004	0	0.127301	0.169483	0.241706	0	0.112474	0.130916	0	0.183567	0	0.064325	0.061973	0.075557	0	0	0	0.0188892	0	0	0	0	0	0	0.119498	0.314038	0	0.108384	0	0.083066	0	0	0.0207665	0	0	0	0.20973	0.0524325	0.094889	0	0.349768	0.100451	0.136277	0	0	0	0.178323
AAEL001696	0.096575	0.065118	0	0.090418	0.0630277	0.020247	0.122228	1.07379	0.318046	0.383577	0.087708	0.039213	0.018225	0.081257	0.0566007	0.040218	0.047612	0.144005	0.044525	0.06909	0.194583	0.043247	12.1688	0.066467	3.11827	0.125136	0.980481	0.261204	0.065139	0.35799	8.75348	6.76757	0.020733	0.089843	3.90791	2.84702	0.086569	4.18981	2.17892	2.32558	0.653743	1.49547	0.145635	0.968759	0.815901	0.148503	0.307961	0.168344	0.07594
AAEL001690	537.559	245.651	317.302	310.9	352.853	739.047	402.751	1399.95	873.233	853.746	9294.9	12440.5	8301.16	14450	11121.6	21201	24130.6	19594.6	26184.4	22777.6	30461	27830.4	33617.2	42808.7	33679.3	52240.6	44820.4	58130.2	54963.7	52538.7	61153.6	47021.8	52582.5	53692.4	53612.6	27598.2	34146.6	29582.7	25206.4	29133.5	2223.39	7022.34	883.835	3186.23	3328.95	74.7842	926.419	368.136	1293.39
AAEL001674	9.65915	4.34545	4.2865	3.86269	5.53845	10.4555	4.92549	12.5414	10.3462	9.56716	114.841	143.139	57.0951	136.96	113.009	824.612	910.004	467.878	835.783	759.569	2598.7	2076.48	2154.27	4514.26	2835.93	8840.29	7583.32	8878.97	9697.8	8750.1	10168.9	8138.02	6789.84	7247.92	8086.18	3073.96	4647.66	3588.9	3469.37	3694.97	197.482	584.966	30.4967	113.747	231.673	6.13682	16.3259	43.551	25.1326
AAEL001673	160.854	261.87	192.347	187.245	200.579	176.146	230.082	191.394	180.957	194.645	213.996	256.673	251.05	232.729	238.612	251.514	256.496	223.665	242.663	243.584	236.867	303.822	270.332	244.428	263.862	194.112	219.831	224.685	201.463	210.023	120.335	196.429	126.114	175.336	154.554	99.492	159.342	80.2551	112.312	112.85	138.209	157.683	195.574	229.965	180.358	184.321	292.277	215.594	217.092
AAEL021050	0	0	0	0	0	0	0	0	0.361297	0.0903242	0	0	0.239061	0	0.0597652	0	0	0.198542	0	0.0496355	0	0	0	0	0	0	0	0	0	0	0	0.327556	0	0	0.081889	0.171611	0	0.105056	0.198269	0.118734	0.260607	0	0	0.162943	0.105887	0	0	0	0.299736
AAEL001688	2.07607	3.00775	2.24885	1.80921	2.28547	2.35739	2.34228	1.79799	1.73492	2.05814	2.94169	2.1486	3.92372	2.06282	2.76921	1.55057	1.53591	0.648585	1.08554	1.20515	1.4443	1.24084	1.30007	1.50296	1.37204	2.24249	2.3836	2.27275	2.1224	2.25531	2.49764	3.55894	3.08031	3.53985	3.16918	3.01216	3.5349	3.08331	3.28806	3.22961	5.35791	3.79047	4.81672	4.14964	4.52868	7.42668	6.76495	6.72665	5.58062
AAEL017356	2.37335	2.76024	2.61938	2.88154	2.65863	3.79477	4.9823	13.6522	6.20245	7.15793	28.5089	28.1265	41.1998	25.2827	30.7795	20.3607	19.6224	28.1061	16.0681	21.0393	16.4158	15.9818	1.09386	18.7986	13.0725	10.1393	8.48372	11.5259	9.05134	9.80006	4.72034	6.03083	4.78651	5.33134	5.21726	6.26729	4.61033	4.99168	6.96188	5.7078	9.36048	8.55754	10.2367	12.4025	10.1393	8.38802	9.92063	7.71399	6.47314
AAEL017931	2.34722	0.342794	1.46489	0	1.03873	0.261229	0.243828	0.992147	0.71638	0.553396	0.200933	0.416694	0	0	0.154407	0.340127	0	0	0	0.0850318	0	0	0	0	0	1.32763	0.627686	0	0.367425	0.580685	0.46724	0.943743	0.30552	0	0.429126	0.228895	0.635923	0	0	0.216204	0.336725	1.08957	1.71834	4.20483	1.83737	1.54808	0	1.74997	0.884494
AAEL017826	0.729462	0.296374	1.45387	0.331634	0.702835	0.545354	0	0.325548	0.328565	0.299867	0.432905	0	0	0	0.108226	0	0.769396	0	2.65067	0.855016	2.23751	0	0	0.552778	0.697572	1.17844	0.989722	0	0.367425	0.633896	0	0	0.318963	0	0.0797407	0.816599	0.654963	0.366996	0.632387	0.617736	1.29666	0	3.37111	6.36614	2.75848	3.60366	1.89505	2.57349	0.844441
AAEL008769	667.443	913.804	569.912	814.119	741.319	674.565	1188.85	1776.62	1256.51	1224.13	10797.9	9151.59	10680.6	10111.3	10185.4	11260.8	9943.66	12381.8	10120.8	10926.8	11846.9	11658.1	13483	11672.5	12165.1	8838.26	8949.17	9607.33	8354.58	8937.33	3866.95	4893.56	3473.64	4295.95	4132.52	1675.29	2537.65	1608.69	1510.27	1832.98	236.787	913.468	207.868	200.162	389.571	7.90731	509.456	214.448	161.213
AAEL001703	42079	49413	44776.4	48039.4	46077	42528.9	48953.8	41057.3	44806.4	44336.6	13188.3	17096	16343.3	13264.7	14973.1	7421.06	6351.47	7214.33	5194.67	6545.38	5063.78	6513.88	3131.48	4872.1	4895.31	7569.38	7572.32	7250.7	6901.7	7323.53	12531.7	10573.4	13477.3	11941.6	12131	18834.5	17565.9	20432.2	19267.7	19025.1	29175.5	29372.9	31716.9	24572.5	28709.5	22583.7	25478.4	24862.1	18351.6
AAEL001693	141.916	117.496	128.397	151.74	134.887	139.175	238.027	349.427	220.285	236.728	9357.11	8712.06	9673.89	9708.36	9362.86	10208.5	10570.9	12194.5	10721.7	10923.9	10691.8	9352.52	11918.9	9766.58	10432.5	7634.84	6932.25	8366.91	8098.99	7758.25	3663.31	3809.85	3803.42	4153.94	3857.63	1124.43	1266.64	1371.95	1120.92	1220.99	210.992	387.211	174.088	186.817	239.777	26.0536	165.332	68.6565	93.6075
AAEL020351	0.028668	0	0	0	0.007167	0	0	0	0	0	0	0	0	0	0	0	0	0	0	0	0	0	0	0	0	0.014687	0	0	0.013595	0.0070705	0	0	0	0	0	0	0	0	0	0	0.013233	0	0.016387	0	0.007405	0.008133	0	0	0
AAEL023419	0.106093	0.035764	0.026411	0.013919	0.0455467	0.023196	0	0	0	0.005799	0	0	0	0	0	0	0	0	0	0	0	0.017211	0	0.014733	0.007986	0	0	0	0	0	0	0.0202	0.073768	0.06875	0.0406795	0.045673	0.065138	0	0	0.0277028	0	0.045283	0	0.015749	0.015258	0.062773	0.059363	0.094256	0.131763
AAEL026735	0.078523	0.011377	0	0	0.022475	0	0	0	0	0	0	0	0	0	0	0	0	0	0	0	0	0	0	0	0	0	0	0	0	0	0	0	0	0	0	0	0	0	0	0	0	0.078008	0	0	0.019502	0	0.049584	0.123454	0
AAEL027666	5.46546	6.08656	5.2554	5.1654	5.4932	5.92005	5.34393	6.33601	5.80023	5.85005	6.54379	7.67256	7.47409	7.04166	7.18303	5.3385	5.22583	5.01177	4.79176	5.09196	4.58285	5.27504	4.57449	3.83065	4.56576	4.94913	4.47208	4.23682	3.32369	4.24543	2.93661	4.1219	3.62017	3.58998	3.56717	4.76406	3.5709	4.41804	4.54768	4.32517	8.22817	7.03421	8.66939	8.5129	8.11117	15.9689	13.1517	13.6037	15.7028
AAEL023441	55.1629	60.389	57.8297	73.4191	61.7002	62.9852	65.008	53.7812	65.8552	61.9074	31.7296	32.1121	35.7945	35.55	33.7965	11.4704	12.0075	10.4375	11.3196	11.3087	9.0295	12.5581	7.95179	6.78468	9.08101	10.647	10.9019	8.89439	6.64528	9.27213	6.41538	15.1966	7.44566	6.99868	9.01409	7.3954	13.7731	7.09567	6.44832	8.67812	16.0926	12.6676	20.6168	20.5345	17.4779	38.4302	29.0586	44.8169	36.3858
AAEL028223	0	0	0	0	0	0.017519	0	0	0	0.00437975	0	0	0.017948	0	0.004487	0	0	0	0.020001	0.00500025	0	0	0	0	0	0	0	0.058048	0	0.014512	0	0	0	0	0	0	0	0	0	0	0	0	0	0	0	0	0	0	0
AAEL013413	0.026591	0	0	0.114866	0.0353642	0.037888	0	0	0.093221	0.0327773	0	0	0.101793	0.076348	0.0445352	0	0.028407	0	0	0.00710175	0	0	0.141284	0	0.035321	0	0	0	0	0	0.09945	0.051779	0.022244	0	0.0433682	0	0.023027	0	0	0.00575675	0.024714	0	0.150909	0.070391	0.0615035	0.122749	0.064594	0	0.087819
AAEL020389	0	0	0	0.115403	0.0288507	0.04512	0	0	0	0.01128	0	0	0.034636	0	0.008659	0	0	0	0	0	0.0452	0	0	0.05949	0.0261725	0	0	0.084635	0	0.0211588	0	0.05521	0.118766	0.038399	0.0530938	0	0	0	0	0	0.232126	0	0	0	0.0580315	0	0	0.052257	0
AAEL024974	0	0	0	0.029713	0.00742825	0.028356	0	0.043004	0	0.01784	0	0	0	0	0	0	0	0.040116	0	0.010029	0.013813	0	0	0.033714	0.0118817	0	0	0	0	0	0	0.066715	0.021167	0.040628	0.0321275	0	0	0	0	0	0.027964	0.058296	0.023696	0.071401	0.0453392	0	0	0.124534	0
AAEL026720	0.0913	0	0	0	0.022825	0	0.029358	0	0	0.0073395	0	0	0	0	0	0	0	0	0	0	0	0	0	0	0	0	0	0	0	0	0	0.040022	0	0	0.0100055	0	0	0	0	0	0.009451	0	0	0	0.00236275	0	0.015291	0	0.113141
AAEL020779	0	0	0	0	0	0	0	0	0.083073	0.0207682	0	0	0	0	0	0	0	0	0	0	0	0	0	0	0	0	0	0	0	0	0.062044	0	0	0.035333	0.0243443	0	0	0	0	0	0	0	0	0	0	0	0	0.105213	0.054958
AAEL001605	33.6049	36.5857	29.5627	29.8861	32.4099	38.7871	31.3757	30.7809	30.0055	32.7373	23.1866	21.9343	24.2594	25.0438	23.606	22.281	17.5669	14.9993	19.0078	18.4638	16.1645	18.8411	13.0104	13.2118	15.3069	21.2387	27.2845	20.6485	20.376	22.3869	33.5658	34.2176	28.7698	30.1187	31.668	37.7922	33.9936	34.4642	30.0029	34.0633	50.9777	50.6391	53.993	50.8124	51.6055	95.783	79.857	94.2774	86.9517
AAEL010509	5.74959	6.96022	6.89079	6.40719	6.50195	7.77279	6.3145	6.8499	6.19011	6.78182	5.42322	5.47049	7.46223	7.51201	6.46699	4.30777	3.71594	2.74455	3.95906	3.68183	5.10247	3.44552	3.98905	4.02405	4.14027	5.24559	4.52416	4.62854	3.67809	4.5191	4.92016	5.17842	4.49341	4.06885	4.66521	4.23252	4.62721	4.7157	4.52197	4.52435	8.21199	6.0082	8.49106	9.17483	7.97152	15.8663	10.9874	14.9387	11.7461
AAEL010507	0	0.129898	0.122327	0.077699	0.082481	0.112546	0.051627	0	0	0.0410433	0	0	0.069172	0.079684	0.037214	0.075009	0.131582	0	0.071968	0.0696398	0	0.163609	0.105372	0.05675	0.0814327	0.035568	0.055541	0.030663	0.082414	0.0510465	0.074995	0.094626	0	0.095192	0.0662033	0.07576	0.114902	0.146086	0.045317	0.0955162	0.222056	0.036446	0.092025	0.332097	0.170656	0.15545	0.261541	0.098857	0.268499
AAEL027886	3.4019	2.39745	2.80887	2.49851	2.77668	3.3395	1.98179	2.99166	1.86958	2.54564	2.5448	1.86238	2.08931	2.25499	2.18787	3.4501	2.23	1.99828	1.86333	2.38543	4.07746	2.25568	3.82733	2.96255	3.28076	3.60069	3.23289	5.23128	2.60203	3.66672	3.91183	3.67815	3.24489	3.12661	3.49037	3.35587	2.14027	2.38541	2.28695	2.54212	3.56581	3.73304	3.30226	3.10928	3.4276	5.77188	4.51827	5.86322	5.39695
AAEL010506	7.25884	3.99816	6.69167	5.76267	5.92783	7.27239	5.2277	4.18911	4.46635	5.28889	6.34117	5.98732	5.44713	5.59903	5.84366	6.27206	5.37438	1.43824	4.43634	4.38026	5.87977	5.59351	4.1719	5.05066	5.17396	6.33247	5.51016	5.50297	4.73747	5.52077	7.4437	6.408	4.8999	4.38945	5.78526	9.12472	4.68275	3.47577	3.94298	5.30655	8.06309	6.75518	6.18813	6.05651	6.76572	9.36296	7.87845	5.45761	8.81389
AAEL010505	21.272	24.402	18.5614	19.5653	20.9502	20.6865	22.154	18.5072	19.8813	20.3073	25.9033	23.5141	21.5474	28.4174	24.8456	30.0284	35.0692	40.5386	35.1981	35.2086	36.1231	35.6437	46.2352	40.3011	39.5758	36.316	40.4782	43.066	39.6571	39.8793	21.0121	26.6167	19.9284	24.1278	22.9213	18.1806	23.597	20.2102	19.4887	20.3691	24.2396	24.1188	24.4145	34.7638	26.8842	53.4265	45.1145	48.7581	60.8864
AAEL010504	4.73513	5.93134	4.90013	4.38629	4.98822	7.12647	4.97588	4.98624	4.5605	5.41227	13.8088	11.8286	13.7406	14.3123	13.4226	14.8206	13.4547	21.9525	13.5767	15.9511	10.7782	9.78957	13.7488	12.3331	11.6624	9.74787	8.79176	9.37128	7.462	8.84323	4.80551	6.12762	5.90017	4.85894	5.42306	4.77465	5.38317	5.85895	4.73333	5.18752	8.81523	9.2126	10.1723	13.2347	10.3587	15.8338	12.3444	14.1944	12.7401
AAEL010508	22.4467	22.3413	18.1136	21.5666	21.1171	24.6299	19.7301	18.4556	19.921	20.6841	18.315	15.1449	12.2432	15.2626	15.2414	27.3937	21.7924	11.8287	18.5533	19.892	27.6166	25.6046	23.8921	24.9196	25.5082	29.1354	29.5058	21.3105	26.1353	26.5218	41.0618	33.1485	32.2161	34.7894	35.304	41.8872	33.4131	40.9818	45.0879	40.3425	93.1813	67.483	76.9575	97.3972	83.7547	92.6998	81.179	68.0734	67.7202
AAEL019273	0.217945	1.14534	1.80803	0	0.79283	1.36547	0	0	0	0.341367	0.519683	0.504943	0.194312	0	0.304735	0.548477	0.468719	0	1.05657	0.518441	0.26286	0	0	0.515958	0.194705	0.723557	0.839606	0	0.33563	0.474698	0.308981	0.829036	0.787197	0.927873	0.713272	0	1.53617	1.0563	1.16369	0.93904	0.445346	0.593402	0	0.47515	0.378474	0.660743	2.2851	1.33376	1.16732
AAEL024153	0.972592	0.526577	0.552315	0.841469	0.723238	0.901568	0.667318	0.556395	0.524152	0.662358	11.6214	5.49725	5.05696	8.33523	7.62771	2.75732	2.21423	0.843235	1.61882	1.8584	3.8034	2.13915	1.29916	1.62054	2.21556	4.6936	3.24429	2.32564	4.74313	3.75167	10.0735	5.10265	4.6541	7.52181	6.83802	6.88007	3.05833	3.83358	3.48925	4.31531	3.075	3.00478	1.36967	1.38288	2.20808	1.05443	1.39379	0.503193	0.803307
AAEL019746	12.0569	18.4999	10.0257	10.5456	12.782	16.235	11.715	11.1299	10.899	12.4948	50.1528	42.0491	42.5728	49.5787	46.0883	69.0712	55.5076	45.0802	59.5284	57.2969	65.4907	49.0235	59.9003	60.0257	58.6101	39.9551	47.1535	41.803	36.5025	41.3535	44.6757	35.445	32.0617	34.7289	36.7278	42.3272	41.0973	37.764	34.3713	38.89	64.5571	77.8087	66.242	72.5817	70.2974	70.2093	83.531	69.783	47.5078
AAEL027828	0	0	0.021206	0	0.0053015	0.005303	0	0.008629	0	0.003483	0	0	0	0.010319	0.00257975	0	0	0	0	0	0.016442	0	0	0.007407	0.00596225	0.01993	0	0	0	0.0049825	0	0.013575	0	0	0.00339375	0.026443	0.017329	0.008366	0.024225	0.0190908	0	0	0.011499	0.018415	0.0074785	0.01009	0.027688	0	0
AAEL024363	0.359459	0	0	0.81579	0.293812	0	0	0.354701	0.432299	0.19675	5.4321	4.10808	3.62165	4.17961	4.33536	6.2331	3.27602	2.69206	5.24777	4.36224	7.48581	3.36388	5.41507	5.20681	5.3679	3.34352	2.2566	2.65922	2.20335	2.61567	1.75282	1.29906	1.50555	1.20616	1.4409	1.92253	0	1.75083	0.928123	1.15037	3.49524	4.30833	4.65582	3.68469	4.03602	6.00525	0	5.14829	0
AAEL028946	0	0	0	0	0	0	0	0	0	0	0	0	0	0	0	0	0	0	0	0	0	0	0	0	0	0	0	0	0	0	0	0	0	0	0	0	0	0	0	0	0	0	0.44042	0	0.110105	0	0	0.276755	0
AAEL021667	66.8871	60.5982	55.5195	62.8449	61.4625	66.1982	58.7759	54.7923	61.1191	60.2214	23.1435	28.358	25.0657	26.4955	25.7657	15.0639	17.0228	9.34763	14.1598	13.8986	13.921	20.6125	12.5	16.0156	15.7623	20.8158	26.6715	16.6093	20.0495	21.0365	42.7126	34.34	39.062	35.4589	37.8934	58.5749	47.2796	51.1904	56.015	53.265	125.809	88.5995	123.036	130.866	117.078	147.718	138.193	125.169	109.337
AAEL011343	60.2057	80.2273	50.5056	51.7319	60.6676	76.4446	54.2473	69.3135	56.5507	64.139	112.675	84.4548	87.7313	84.1198	92.2452	65.1518	43.3505	36.0582	39.7033	46.066	46.0426	48.8894	41.7083	60.6264	49.3167	111.879	120.654	109.946	98.2992	110.195	184.115	159.751	176.841	143.92	166.157	166.751	148.474	155.727	115.2	146.538	112.851	132.714	121.655	88.2092	113.857	142.748	120	124.711	120.707
AAEL011347	40.293	60.6312	41.128	44.297	46.5873	52.3845	55.4537	74.8587	58.9447	60.4104	25.7154	25.0935	27.3143	26.4563	26.1449	20.7306	19.9516	15.9783	17.6603	18.5802	22.3897	41.3779	18.4087	33.924	29.0251	33.3332	50.9993	35.4668	35.9363	38.9339	25.7758	40.239	26.5223	26.7003	29.8094	21.5238	40.6804	28.2367	26.3903	29.2078	36.177	50.3307	44.9467	54.6585	46.5282	120.675	109.14	111.832	114.16
AAEL011349	0.220251	0.756383	0.216426	0.323633	0.379173	0.355231	0.394391	0.258297	0.30123	0.327287	0.340116	0.289762	0.44125	0.378155	0.362321	0.451441	0.532413	0.536526	0.474767	0.498787	0.24595	0.730707	0.511933	0.375878	0.466117	0.473561	0.518814	0.314523	0.312035	0.404733	0.166077	0.43611	0.091595	0.271372	0.241288	0.560506	0.637318	0.716395	0.98512	0.724835	2.31299	1.596	1.73066	2.66118	2.07521	1.25292	2.14785	1.30547	1.37113
AAEL026965	0.441267	0.253509	0	0.487096	0.295468	0.130293	0	0.410791	0.505738	0.261705	0	0	0	1.33545	0.333862	0.274344	0	0	0.153451	0.106949	0	0	0	0.123755	0.0309387	0	0	0	0	0	0	0	0	0	0	0.193619	0.457649	0	0.410954	0.265555	0.339392	0.803908	0	0	0.285825	0.557731	1.2471	0	0.353566
AAEL011340	30.966	31.9845	26.6281	29.9719	29.8876	33.852	27.1983	28.9066	30.9355	30.2231	41.1048	42.1525	45.9938	41.9798	42.8077	45.9039	46.4718	49.5772	42.7015	46.1636	35.9018	35.575	36.9898	30.8417	34.8271	20.1317	21.1996	18.3907	11.2564	17.7446	13.2856	15.922	13.2092	12.1723	13.6472	19.4529	19.5254	17.2651	15.6637	17.9768	35.5622	30.6641	32.8569	38.2118	34.3237	64.4093	55.2181	57.8379	61.596
AAEL011350	1.22605	1.21143	1.33549	1.18917	1.24053	1.35697	0.928108	1.14419	0.751411	1.04517	0.398362	0.576315	0.49488	0.257269	0.431706	0.302599	0.30833	0.376154	0.528415	0.378875	0.151209	0.321201	0.261296	0.290202	0.255977	0.365045	0.293307	0.190548	0.260306	0.277301	0.568598	0.415684	0.413246	0.677214	0.518685	1.08962	1.13376	0.935063	1.13131	1.07244	2.5178	1.24726	3.54996	3.91036	2.80635	5.73889	4.30707	5.33751	4.22133
AAEL011338	0.327575	0.317689	0.2394	0.163456	0.26203	0.285591	0.225831	0.270216	0.124482	0.22653	0.65578	0.676079	0.995017	1.0483	0.843794	0.960305	0.643149	1.14598	1.1034	0.963209	1.04276	0.819941	0.975419	1.4555	1.0734	0.61409	0.779244	0.823977	0.693668	0.727745	0.308691	0.524937	0.465761	0.49657	0.44899	0.575286	0.380664	0.250097	0.292424	0.374618	0.665218	0.473499	0.808328	0.756287	0.675833	0.466271	0.582645	0.44587	0.467988
AAEL026041	0.986961	0.405002	0.483688	0.627946	0.625899	0.657606	0.454029	0.558484	0.761433	0.607888	1.29589	0.586436	0.389406	0.812204	0.770984	0.683535	0.46949	0.935898	0.150685	0.559902	0.215435	0.429135	0.452256	0.834077	0.482726	0.668656	0.636822	1.46211	0.519453	0.821759	1.30493	1.14506	1.33928	0.612999	1.10057	1.48728	1.23204	1.88602	1.36864	1.4935	1.85158	1.52335	1.12658	1.5637	1.5163	2.07601	0.743386	1.20429	1.48356
AAEL011348	0	0	0	0	0	0	0	0	0	0	0	0.183279	0.180905	0.200288	0.141118	0.145456	0.048239	0.122511	0.053597	0.0924507	0.06624	0	0.096783	0	0.0407558	0.030795	0.048659	0	0	0.0198635	0	0	0	0	0	0	0.039058	0	0	0.0097645	0.196631	0	0.069602	0	0.0665582	0	0	0	0
AAEL009968	23.0162	17.8631	27.4697	26.7309	23.77	20.785	24.9348	26.4802	28.4984	25.1746	91.3981	106.549	96.1659	118.359	103.118	143.992	149.57	131.239	174.773	149.894	166.312	150.468	189.483	193.855	175.03	90.8028	100.498	115.397	129.067	108.941	80.8903	73.8608	74.5105	98.46	81.9304	75.3184	79.1295	77.7082	83.0897	78.8114	54.4518	75.2108	57.7017	78.7456	66.5275	16.0702	54.2839	46.4289	25.6631
AAEL009974	0.068014	0	0.031919	0.13355	0.0583707	0.244296	0	0.044984	0.031608	0.080222	0.038092	0	0.027904	0.034947	0.0252358	0	0.071689	0	0.030598	0.0255718	0	0.048611	0	0.073744	0.0305888	0.120645	0.055	0.071728	0	0.0618433	0	0.188555	0	0.174053	0.090652	0.087151	0.057616	0.042502	0.098211	0.07137	0.282826	0.127529	0.203802	0.045468	0.164906	0.479296	0.167455	0.172349	0.036838
AAEL009961	6.1996	7.28673	7.82276	6.99841	7.07688	7.33477	5.24927	6.00247	8.80441	6.84773	5.7585	4.45359	5.85993	7.40241	5.86861	7.14274	7.17859	8.31956	7.44762	7.52213	11.051	9.48035	9.8851	11.6467	10.5158	7.80835	9.09064	11.1539	5.56162	8.40362	2.88853	5.34571	3.52755	2.62503	3.59671	2.57031	4.08725	3.13955	2.34359	3.03518	2.61971	4.68468	4.35541	5.71346	4.34331	13.0628	9.25467	12.4004	17.1157
AAEL009964	174.83	185.965	171.033	173.916	176.436	178.934	187.091	178.882	190.068	183.743	202.405	206.112	198.775	205.478	203.192	206.053	216.349	239.033	227.667	222.276	249.98	254.777	295.4	251.641	262.949	250.514	281.971	290.645	272.278	273.852	166.75	237.528	165.419	150.537	180.059	100.428	156.09	122.11	74.3944	113.255	82.5878	100.769	101.16	118.407	100.731	232.835	207.595	259.882	321.313
AAEL009957	2.04802	2.13807	1.63183	2.15229	1.99255	2.51285	1.70267	3.15857	2.09349	2.3669	10.6654	7.68845	9.74087	9.01999	9.27868	6.55736	7.3123	5.43499	5.87675	6.29535	3.81744	3.52457	4.05364	3.24574	3.66035	3.81055	4.47293	4.47793	3.58676	4.08704	3.74113	2.80711	2.68512	3.13448	3.09196	3.01109	2.71435	2.7136	1.88246	2.58037	4.54956	3.45172	3.39162	4.29192	3.9212	5.24037	4.24625	3.71919	3.97106
AAEL009965	0	0	0.05717	0	0.0142925	0.115308	0.251931	0.910014	0.476429	0.43842	2.73419	3.5037	1.89939	2.67416	2.70286	6.22133	3.47193	5.81521	3.10132	4.65245	6.67601	5.7893	6.72364	6.72088	6.47746	16.7159	19.3596	21.8458	13.1545	17.7689	13.7695	10.2306	5.17246	4.87364	8.51157	1.84072	9.25038	4.14777	3.56478	4.70091	0.438187	3.30809	0.279474	0.408279	1.10851	0.245633	0.654336	0.28097	0.473289
AAEL015294	0	0	0	0	0	0	0	0	0	0	0	0	0	0	0	0	0	0	0	0	0	0	0.463334	0	0.115834	0	0	0	0	0	0	0	0	0	0	0	0	0	0	0	0	0	0	0	0	0	0	0	0
AAEL009971	4.23804	4.13787	3.24797	3.52703	3.78773	3.65452	3.15722	3.69462	4.14478	3.66278	3.25413	2.32269	2.97277	3.47384	3.00586	2.55756	2.006	2.29417	1.54042	2.09954	2.69072	2.30735	2.46955	2.08015	2.38694	1.53034	1.95018	1.87693	1.38988	1.68683	2.38175	2.10128	1.9457	2.07273	2.12537	2.87403	2.75774	2.448	3.03954	2.77982	4.76179	4.54491	6.1409	6.248	5.4239	8.54102	7.651	6.90535	7.36175
AAEL025123	3.61334	2.22142	2.11997	2.34863	2.57584	3.17537	2.42465	1.80866	2.25153	2.41505	3.85245	3.06942	2.70253	4.00112	3.40638	4.2253	3.33432	1.21777	2.26613	2.76088	4.16804	3.15967	2.07447	3.00699	3.10229	2.72116	2.88743	1.6821	2.23646	2.38179	3.68091	2.29832	2.12919	2.37427	2.62067	2.34143	1.80959	1.8509	1.56075	1.89066	3.53123	3.51024	2.73289	3.0996	3.21849	4.6446	4.43645	2.21977	3.3952
AAEL009959	15.6498	14.7987	14.8799	14.8825	15.0527	16.212	13.0843	11.4241	13.331	13.5128	13.9814	18.4013	16.9287	17.3749	16.6716	15.457	16.3718	9.90876	12.621	13.5896	11.5633	14.057	11.5261	9.21841	11.5912	9.76247	14.8664	8.99205	8.47197	10.5232	10.6103	11.5768	9.2974	9.71526	10.2999	10.3586	12.1036	10.9308	10.7624	11.0388	15.6712	17.4334	17.344	19.6336	17.5205	33.0865	36.3725	33.2739	38.5063
AAEL009969	0	0	0	0	0	0	0	0	0	0	0.320492	0	0	0	0.080123	0	0	0	0	0	0	0	0	0	0	0	0	0	0	0	0	0	0	0	0	0	0	0	0	0	0.254483	0.353647	0	0	0.152032	0	0	0	0
AAEL009958	6.20486	8.35511	6.40061	6.13189	6.77312	8.5002	5.59105	5.87323	6.21649	6.54524	4.7447	3.73384	4.191	4.16721	4.20919	3.64416	5.43603	3.07353	3.59942	3.93828	3.99638	5.62666	4.73431	4.4477	4.70126	5.74087	8.04885	5.67038	5.59564	6.26393	8.03563	8.0509	6.78519	7.34219	7.55348	8.26821	7.59217	6.85472	7.75357	7.61717	13.1748	11.3515	13.4971	14.0012	13.0062	20.1917	20.4169	18.7478	17.4455
AAEL021169	0.176045	0.041141	0.086538	0	0.075931	0	0.138165	0.189773	0.37002	0.174489	0	0	0.057409	0.261099	0.079627	0	0	0	0	0	0.197706	0	0	0.090779	0.0721212	0.095265	0	0.376191	0.151646	0.155776	0.148417	0	0.31348	0.193361	0.163815	0.063485	0.212615	0	0.050749	0.0817123	0.397957	0.305966	0.499635	0.399534	0.400773	0.431828	0.454501	0.283852	0.381766
AAEL019862	0.824051	0.620084	0.865358	0.923715	0.808302	0.883206	1.2475	6.86523	2.81716	2.95327	5.84249	4.72363	3.73766	5.7772	5.02025	8.17923	7.46811	5.43061	6.71514	6.94827	9.44658	5.57923	9.82584	8.4819	8.33339	5.46434	5.70624	9.09543	12.68	8.2365	15.6082	5.99716	12.3001	8.34313	10.5621	10.7921	6.56085	15.6752	10.9982	11.0066	4.33676	4.35609	3.14601	6.63736	4.61906	0.888977	2.16038	2.55052	2.11831
AAEL012698	12.6437	15.3929	11.996	15.7377	13.9426	13.7933	15.6656	13.5286	14.1906	14.2945	3.86186	8.74877	8.66224	5.06369	6.58414	2.71669	3.79588	2.66984	1.8822	2.76615	1.50754	7.1182	3.47708	3.01745	3.78007	4.68734	9.01608	4.20343	5.38588	5.82318	4.48986	6.1906	5.90106	4.22196	5.20087	8.07642	8.23062	7.29449	9.95849	8.39001	23.1658	18.344	25.9919	28.5212	24.0057	29.6576	31.9283	29.2181	28.4646
AAEL012701	30.779	36.8152	24.9953	24.7793	29.3422	38.3179	29.704	31.028	27.9637	31.7534	31.5063	28.0468	27.4816	29.5898	29.1561	31.1592	24.7923	14.3034	24.5657	23.7051	25.8835	33.0971	22.862	31.6142	28.3642	64.7045	55.0353	60.7508	76.5142	64.2512	99.546	79.3069	77.6245	86.2379	85.6788	80.1059	77.9262	77.1326	80.87	79.0086	109.662	108.246	99.993	104.623	105.631	134.876	134.08	102.101	105.911
AAEL012700	6.48166	5.75305	7.57044	3.96761	5.94319	11.0408	10.6232	17.1064	11.5103	12.5702	30.114	37.2712	43.9768	38.2245	37.3967	20.5286	17.5967	9.83611	14.5171	15.6196	9.29547	16.5727	9.44665	7.10824	10.6058	2.72919	7.23313	3.60546	4.2384	4.45154	7.74151	5.11194	6.14957	7.39909	6.60053	5.03479	7.01489	5.7375	6.89294	6.17003	10.0895	12.5327	14.6195	11.0396	12.0703	14.9789	18.3633	8.76838	10.694
AAEL012702	183.475	189.465	161.265	163.795	174.5	294.943	270.706	492.864	338.839	349.338	710.888	858.148	980.467	833.899	845.85	423.04	458.401	331.522	352.906	391.467	262.33	342.71	291.438	213.533	277.502	98.9277	209.161	97.9776	131.418	134.371	205.295	192.436	183.361	148.46	182.388	196.633	180.623	212.571	215.553	201.345	305.781	262.225	298.413	318.495	296.228	297.385	380.582	213.951	271.541
AAEL017377	0	0	0	0	0	0	0	0	0	0	0	0	0	0	0	0	0	0	0	0	0	0	0	0	0	0	0	0	0	0	0.040359	0	0	0	0.0100897	0	0	0	0	0	0	0	0	0	0	0	0	0	0
AAEL025139	0	0	0	0	0	0	0	0	0	0	0	0	0	0	0	0	0	0.014176	0	0.003544	0	0	0	0	0	0	0	0	0	0	0	0	0	0	0	0	0	0	0	0	0	0	0	0	0	0	0	0	0
AAEL013278	2.80447	2.99903	1.98157	2.67847	2.61588	3.09493	2.4926	2.61356	3.63225	2.95834	2.19881	2.5859	2.48878	2.32063	2.39853	1.49741	1.55634	1.19927	1.64087	1.47347	2.01731	2.18687	2.23733	1.95749	2.09975	2.36743	2.80709	2.0208	2.2033	2.34966	2.95744	2.56988	2.08133	2.19042	2.44977	2.81026	2.30395	2.93463	3.04826	2.77427	3.85145	3.04808	2.69676	4.64816	3.56111	6.57351	4.93793	5.33429	5.71422
AAEL013281	0.065356	0.406043	0.175521	0.202017	0.212234	0.302839	0.30659	0.430219	0.622657	0.415576	0.151126	0.329215	0.287805	0.268085	0.259058	0.204321	0	0.137836	0.071903	0.103515	0.055495	0.152568	0.166596	0.234506	0.152291	0.172253	0.187231	0.244212	0.061413	0.166277	0.164537	0.286055	0.338978	0.471319	0.315222	0.098014	0.33187	0.173112	0.218909	0.205476	0.612194	0.445809	0.475205	0.316932	0.462535	0.90592	0.822793	0.730102	0.641926
AAEL013279	161.956	192.655	144.183	144.267	160.765	178.231	143.115	140.371	146.289	152.001	262.108	232.031	221.134	291.328	251.65	356.064	321.315	357.132	379.073	353.396	402.378	352.825	431.296	431.884	404.595	396.218	423.813	421.162	460.865	425.514	260.127	413.117	284.527	269.464	306.809	254.027	302.281	275.361	207.666	259.834	285.543	305.105	259.633	278.04	282.08	270.49	288.797	262.876	282.63
AAEL013277	0.06095	0.022665	0.0218	0.050398	0.0389532	0.056203	0.103763	0.08473	0.007362	0.0630145	0.179066	0.137311	0.080102	0.202667	0.149786	0.160388	0.219726	0.080063	0.13611	0.149072	0.21223	0.196116	0.125413	0.378873	0.228158	0.423445	0.616568	0.539204	0.767052	0.586567	1.55691	0.964299	0.806939	1.12175	1.11248	1.4455	0.951606	1.24827	1.42632	1.26792	0.320329	0.438549	0.171179	0.379406	0.327366	0.049053	0.200627	0.093579	0.132494
AAEL013284	612.788	850.29	496.872	416.853	594.201	1107.23	904.002	551.853	375.331	734.604	2704.72	1743.98	1092.12	3128.58	2167.35	5905.52	7414.6	4455.68	8811.42	6646.81	13948.5	10999.2	11033	17250.7	13307.9	31995.9	26999.3	29680	41855.6	32632.7	68481.5	51736.8	69773	72352.1	65585.9	112676	78294.4	99209.5	114348	101132	64169.3	84342.3	57173	45708.5	62848.3	4266.42	28331.4	21367.5	30621.7
AAEL022140	3157.72	3929.9	3208.31	3590.51	3471.61	3281.92	2935.57	3724.45	3593.39	3383.83	2858.62	2857.57	3113.76	2872.99	2925.74	2550.88	2693.15	3207.3	3130.76	2895.52	2729.97	2686.43	2968.02	2311.38	2673.95	2531.24	2548.11	2574.95	2742.73	2599.25	2557.36	3083.02	3057.51	2478.81	2794.18	3124.92	3105.94	3056.68	2722.54	3002.52	3760.73	3257.9	3963.61	3234.9	3554.28	4194	3827.89	4771.93	4052.16
AAEL022250	0	0	0	0	0	0	0	0.018107	0	0.00452675	0	0	0	0	0	0	0	0	0.022057	0.00551425	0	0	0	0	0	0	0.011208	0.034081	0.027646	0.0182337	0	0	0	0	0	0	0	0	0	0	0	0	0.006836	0	0.001709	0	0.078003	0	0
AAEL027944	0.041824	0.019088	0	0	0.015228	0	0	0	0	0	0	0	0	0	0	0	0	0	0	0	0	0	0	0	0	0	0	0	0	0	0	0	0	0	0	0	0	0	0	0	0	0	0	0	0	0	0	0	0
AAEL015014	12.5087	13.9381	10.6704	12.6901	12.4518	12.3064	12.8086	11.4319	11.6923	12.0598	8.23898	5.53543	5.74376	7.69977	6.80448	12.042	16.2873	9.84281	17.0119	13.796	16.225	17.8518	19.1089	24.4354	19.4053	30.2643	27.3626	33.578	31.1004	30.5763	29.8568	29.1433	28.1333	31.3426	29.619	37.163	26.3316	32.226	40.1385	33.9648	39.4953	31.3163	32.3308	31.2276	33.5925	22.8999	27.4948	24.3917	17.2657
AAEL022385	0	0.040946	0	0	0.0102365	0	0	0.029099	0	0.00727475	0.063747	0.028448	0	0	0.0230487	0.041908	0	0.11187	0	0.0384445	0.041093	0.130012	0.109863	0	0.070242	0.068114	0.016411	0.051222	0	0.0339368	0.021289	0	0.185384	0.016165	0.0557095	0	0	0.130773	0	0.0326933	0.089601	0	0	0.096123	0.046431	0	0.217977	0.038011	0.037716
AAEL013741	0.442146	0.723905	0.634627	0.651865	0.613136	0.565677	0.837118	0.944661	0.969221	0.829169	0.239188	0.354026	0.24169	0.29012	0.281256	0.286389	0.345319	0.051126	0.247152	0.232496	0.345264	0.553839	0.265949	0.152867	0.32948	0.37225	0.466507	0.22951	0.229495	0.324441	0.605305	0.804258	0.732444	0.73762	0.719907	0.834836	0.933663	0.589619	1.27746	0.908894	2.0581	2.03436	2.95496	2.31295	2.34009	2.77622	2.41325	2.47115	3.02797
AAEL013744	43.0218	50.5161	38.9707	48.8361	45.3362	50.2021	39.7796	51.6342	42.0327	45.9122	48.6937	43.0132	45.1181	49.2273	46.5131	52.5257	52.9264	57.4826	57.3925	55.0818	73.1701	58.1865	75.3319	63.1454	67.4585	68.8535	66.2372	69.3992	75.4819	69.9929	42.1674	61.7496	38.1991	34.2255	44.0854	28.8969	42.4355	28.3223	17.4866	29.2853	35.8738	32.3874	33.6494	37.5575	34.867	79.7221	68.203	83.3789	90.7647
AAEL019681	24.1781	25.4503	20.3343	25.8241	23.9467	27.7762	24.6296	27.138	27.1848	26.6822	13.2985	13.9578	15.3534	16.2752	14.7212	32.0575	25.9741	13.9168	25.9758	24.481	35.252	29.9384	29.6339	26.3275	30.288	17.7958	18.8343	21.1759	14.2261	18.008	8.32823	9.91461	9.01481	10.8191	9.51919	11.8733	11.1155	11.5358	12.8917	11.8541	24.9189	20.2337	20.8335	20.2458	21.558	39.7029	29.1731	29.391	27.9604
AAEL024010	0.109516	0	0.026662	0	0.0340445	0	0.015634	0.049321	0	0.0162387	0.044775	0.060569	0.02034	0.164274	0.0724895	0	0.150614	0	0.087841	0.0596138	0	0.028673	0	0.112919	0.035398	0.029155	0	0.044611	0	0.0184415	0.16257	0.022996	0.084126	0.044037	0.0784322	0	0.073509	0.046626	0.163444	0.0708948	0	0.07074	0	0	0.017685	0.038057	0	0	0.063284
AAEL011510	22.5302	6.72233	20.2907	15.0273	16.1426	18.3202	16.8317	11.7364	12.746	14.9086	27.5457	14.6318	19.9544	24.2238	21.5889	59.4174	47.9236	41.7961	47.0641	49.0503	121.3	69.5702	106.856	126.219	105.986	108.446	80.6647	122.319	171.321	120.688	375.237	124.458	312.757	345.444	289.474	493.861	265	407.39	354.205	380.114	249.274	189.478	273.84	164.068	219.165	25.4807	22.7988	45.7203	8.27648
AAEL015092	0.029962	0.396843	0.135552	0.288496	0.212713	0.108081	0.224063	0.105099	0	0.109311	0.033059	0	0.048196	0.237718	0.0797432	0	0.093052	0.137547	0.052486	0.0707712	0.081525	0.120672	0.031754	0	0.0584877	0	0.023707	0	0	0.00592675	0	0	0	0.058549	0.0146372	0	0.08818	0	0.024505	0.0281712	0	0	0	0	0	0	0	0.20559	0
AAEL027545	0.055291	0.088087	0	0.252727	0.0990262	0	0.071528	0.026494	0.027431	0.0313633	0	0	0	0	0	0.095694	0	0	0	0.0239235	0.032982	0	0	0	0.0082455	0.092717	0.02435	0	0	0.0292667	0	0	0	0.04731	0.0118275	0.062155	0.017843	0	0	0.0199995	0.055766	0.113047	0.027928	0	0.0491852	0.061124	0	0.084833	0.220459
AAEL002753	1.98513	2.76811	1.48397	1.76722	2.00111	1.96426	1.63643	1.84461	1.97907	1.85609	1.35103	1.51947	1.57768	1.66495	1.52828	1.50632	1.35822	1.5471	1.60725	1.50472	2.59582	1.48557	1.72202	1.40879	1.80305	2.06257	1.77271	1.53413	1.02664	1.59901	1.78851	1.53525	1.55756	1.63086	1.62804	1.39966	1.63647	1.83676	1.49215	1.59126	3.12443	2.74202	2.96144	3.16607	2.99849	4.66183	3.97643	5.94527	4.70741
AAEL002737	241.762	264.769	238.048	216.348	240.232	265.721	236.763	243.544	241.979	247.002	258.216	263.751	249.944	254.148	256.515	290.846	294.132	307.731	308.931	300.41	407.389	380.068	392.312	334.137	378.476	385.111	401.768	396.574	417.619	400.268	294.355	381.544	303.72	296.906	319.131	202.825	281.177	192.08	135.732	202.953	156.925	187.834	198.419	210.298	188.369	382.7	353.795	395.792	424.688
AAEL027584	0.17264	0.336366	0.081977	0.087556	0.169635	0.131505	0.107815	0.073597	0.092961	0.10147	0.080383	0.043609	0.126713	0.066924	0.0794072	0.07396	0.021067	0.012301	0.022037	0.0323413	0.036414	0.071248	0.030811	0.074836	0.0533272	0.166691	0.135785	0.072261	0.174023	0.13719	0.060175	0.040628	0.111227	0.144271	0.0890752	0.019462	0.188651	0.101103	0.099284	0.102125	0.050977	0.181248	0.133742	0.112598	0.119641	0.040505	0.04921	0.028919	0.114395
AAEL002748	32.2026	55.2222	25.0582	29.5612	35.5111	53.4899	39.6243	37.5518	33.6031	41.0673	63.5955	80.9645	76.8827	69.3054	72.687	65.9555	76.6509	60.9685	67.6788	67.8134	67.8965	78.31	65.9245	66.066	69.5493	36.8885	69.6042	38.4921	41.0653	46.5125	21.0831	43.6799	26.292	25.5525	29.1519	17.1376	43.5873	17.9329	13.4922	23.0375	24.2893	40.0898	25.0594	39.2388	32.1693	69.7413	77.1771	51.1308	73.7341
AAEL020645	0	0.025034	0	0	0.0062585	0	0	0.081946	0	0.0204865	0	0	0	0	0	0	0	0	0	0	0	0	0	0	0	0	0.048757	0	0	0.0121893	0	0	0	0	0	0.039277	0	0	0	0.00981925	0	0	0	0	0	0	0.066112	0	0
AAEL024202	0	0	0	0	0	0	0	0.042103	0.046854	0.0222392	0	0	0	0.051449	0.0128623	0	0	0	0	0	0	0	0	0	0	0	0.04967	0	0	0.0124175	0	0	0	0.108663	0.0271657	0	0	0	0	0	0	0	0	0	0	0	0	0	0
AAEL022428	0.372692	0.307069	0.292248	0.453153	0.356291	0.517182	0.537104	0.300289	0.37598	0.432639	0.159936	0.10631	0.18402	0.108005	0.139568	0.247848	0.409043	0.129024	0.107189	0.223276	0.125515	0.640933	0.165728	0.234494	0.291668	0.029527	0.534673	0.907574	0.085705	0.38937	0.542532	0.360825	0.262759	0.566295	0.433103	0.325763	0.522805	0.152845	0.214002	0.303854	0.981145	0.50711	0.532705	0.890748	0.727927	1.70671	0.998518	0.574011	0.887293
AAEL028166	0	0	0	0	0	0	0	0	0	0	0	0	0	0	0	0	0	0	0	0	0	0	0	0	0	0	0	0	0	0	0	0	0	0	0	0	0	0	0	0	0	0	0	0	0	0	0	0	0
AAEL022370	1.72437	1.89277	1.21507	1.76964	1.65046	2.06492	0.959358	1.40604	1.32692	1.43931	1.02503	1.30557	0.824681	0.8952	1.01262	1.5571	1.33837	0.821595	1.06564	1.19568	1.17102	1.11742	1.36839	1.64679	1.32591	1.49528	1.83671	2.53978	2.93406	2.20146	3.29095	2.76031	2.67125	3.46283	3.04633	2.94891	3.24932	3.43736	3.38842	3.256	5.37932	3.59033	5.78068	4.3248	4.76878	6.45438	4.73187	7.40217	5.47868
AAEL002739	2.54352	2.65733	2.31237	2.79977	2.57825	2.37418	2.58525	1.07984	1.92917	1.99211	1.60458	1.32269	1.70162	1.46033	1.52231	1.78743	1.17614	1.23253	2.11245	1.57714	1.32049	1.44139	1.13128	1.39547	1.32216	1.30167	1.88605	2.40007	1.65778	1.81139	1.66996	1.58839	2.41727	2.75122	2.10671	2.38646	2.31415	2.53659	3.81903	2.76406	5.06342	3.26823	5.3086	4.96399	4.65106	7.24755	5.92304	8.82044	7.28285
AAEL002751	1.6408	0.866551	0.92667	0.682231	1.02906	1.01611	0.63264	0.504368	0.895363	0.76212	0.830587	0.399499	0.666356	0.889398	0.69646	0.935602	0.764568	0.151752	0.489116	0.58526	0.769315	1.1092	1.60633	1.30965	1.19862	0.834076	0.887483	0.507285	0.801809	0.757663	1.20101	1.08441	1.32022	1.3016	1.22681	1.42926	1.51704	1.64683	1.49345	1.52165	2.02869	1.54703	2.70305	2.36408	2.16071	3.82084	1.77605	2.4638	2.58099
AAEL018286	1.72204	1.80218	2.06357	1.16622	1.6885	2.04552	1.88096	0.959203	1.1205	1.50155	1.19615	1.18523	1.41958	1.78305	1.396	1.35046	0.997818	1.167	1.3137	1.20725	1.36079	1.28103	1.26145	1.55309	1.36409	1.3628	2.01283	1.6265	1.46313	1.61632	1.77587	2.32948	1.51944	2.03741	1.91555	2.58286	2.01894	3.46942	2.36788	2.60977	4.19751	3.23487	4.5291	4.29541	4.06422	4.90412	4.94284	5.9947	4.28424
AAEL023679	5.52192	9.03764	4.36413	5.03956	5.99081	7.88755	6.6772	5.15967	5.13221	6.21416	2.9552	3.12136	2.22346	2.57004	2.71752	1.93079	1.81604	1.85348	1.4271	1.75685	1.51289	2.75111	1.02702	1.5505	1.71038	2.92432	4.36224	2.84899	4.66221	3.69944	9.64369	9.10215	7.53023	9.21426	8.87258	11.9495	10.5172	10.1976	11.6422	11.0766	18.3901	12.0101	15.4456	13.1581	14.751	16.2057	16.5421	12.7944	11.8885
AAEL002752	0.966125	1.11347	0.741329	0.900532	0.930365	1.31259	0.847964	0.772138	1.04232	0.993753	2.77929	2.39587	2.16009	2.56837	2.47591	2.00012	1.93185	1.80176	2.32523	2.01474	2.4615	2.05218	2.06962	2.21256	2.19896	1.60844	1.57525	1.23487	1.253	1.41789	0.978957	1.17145	0.81751	0.822116	0.947508	0.841233	1.28855	0.796869	1.08671	1.00334	1.33068	1.35655	1.89151	1.55576	1.53363	2.43313	2.56967	3.42167	3.49767
AAEL013904	47.1389	45.3167	49.9011	52.6232	48.745	47.7417	54.6033	49.5324	58.0012	52.4697	26.8654	34.904	31.2572	33.6056	31.6581	70.6499	93.2032	72.35	108.638	86.2103	143.874	138.966	227.702	201.109	177.913	143.344	169.21	215.213	141.544	167.328	34.7015	52.5558	38.4617	38.7451	41.116	33.8337	32.4044	33.3023	40.1501	34.9226	71.5944	46.9439	76.1758	68.2703	65.7461	113.369	81.0763	110.291	103.713
AAEL013902	2.28714	1.44364	1.42475	2.61811	1.94341	2.515	1.86787	1.79428	1.54988	1.93176	3.64031	4.51224	3.72405	3.97746	3.96351	4.99617	4.42454	5.07611	3.29134	4.44704	2.02314	3.69472	2.91869	1.33956	2.49403	0.85658	1.45104	1.51122	0.344931	1.04094	0.451786	1.30274	0.241734	0.390108	0.596593	0.397729	0.413971	0.044611	0.395097	0.312852	0.874186	0.930945	1.20308	1.48038	1.12215	9.40145	5.75798	9.35305	10.874
AAEL023147	0.653746	0.840825	0.801711	0.611738	0.727005	0.717117	0.82333	0.631347	0.702725	0.71863	0.223756	0.577648	0.304928	0.200739	0.326768	0.440207	0.455457	0.535696	0.846552	0.569478	0.499082	0.553909	0.820646	0.646828	0.630116	0.89562	0.649695	0.66163	0.992553	0.799875	0.456155	0.654033	0.836279	0.640476	0.646736	1.39926	1.00084	1.17504	1.26886	1.211	2.37787	1.84626	1.91069	2.6101	2.18623	3.16724	2.21372	2.62363	2.24882
AAEL013903	1.39855	1.83227	1.50953	1.39756	1.53448	1.43265	1.84367	0.532584	0.820902	1.15745	1.08385	1.79542	1.29984	1.29763	1.36918	1.16454	0.849814	1.22889	1.19862	1.11047	1.34621	1.16366	1.30787	0.891743	1.17737	1.08771	1.19508	0.932091	0.894567	1.02736	1.50215	1.49948	1.25327	1.63233	1.47181	1.37635	1.19342	1.63624	1.1113	1.32933	2.33011	2.35999	1.93751	2.13459	2.19055	3.31786	2.98746	3.76668	3.89324
AAEL025459	0.594793	0.578231	0.331208	0.713093	0.554331	0.826401	0.645326	0.39275	0.606763	0.61781	0.173423	0.764286	0.310987	0.618341	0.466759	0.372383	0.541886	0.447978	0.353027	0.428818	1.26463	0.518142	0.458036	0.452406	0.673304	0.496176	0.763067	1.01592	0.765021	0.760046	0.574983	0.803416	0.32434	0.675539	0.594569	0.492557	0.689252	0.925993	0.846645	0.738612	1.13544	0.871354	1.29188	2.29712	1.39895	2.06526	2.02219	2.22556	2.66108
AAEL009182	1.54932	1.34827	1.58517	1.2266	1.42734	1.37335	1.3739	1.60888	0.991053	1.33679	1.18092	0.972774	1.08522	1.19752	1.10911	0.701002	0.846114	0.669848	0.653132	0.717524	0.881893	0.839197	0.832269	0.862702	0.854015	1.32732	1.3043	0.898956	0.680806	1.05285	0.774323	1.19386	1.18357	0.788841	0.985151	1.71409	1.25852	1.33252	1.4881	1.44831	2.79314	1.90691	2.41196	2.77219	2.47105	3.48307	4.49521	3.57586	3.26395
AAEL009184	0.168118	0.055272	0.063887	0	0.0718193	0	0	0	0	0	0	0.037793	0	0	0.00944825	0	0	0	0	0	0	0	0	0	0	0	0	0.035771	0.135414	0.0427963	0	0	0	0	0	0	0	0	0	0	0	0.170072	0	0	0.042518	0	0	0	0
AAEL009189	0.514524	0.426878	0.426453	0.589215	0.489267	0.552643	0.351666	0.44169	0.59267	0.484667	0.138168	0.261574	0.18627	0.247253	0.208316	0.273031	0.205003	0.140992	0.183282	0.200577	0.187981	0.299151	0.160707	0.371731	0.254893	0.335054	0.61145	0.31792	0.434006	0.424608	0.473484	0.286593	0.20981	0.422545	0.348108	0.325605	0.185473	0.382046	0.423178	0.329076	0.672404	0.307236	0.540627	1.0558	0.644015	1.13895	0.823455	0.642362	1.15856
AAEL021139	0	0.039695	0.100981	0	0.035169	0	0.16058	0.084648	0.138554	0.0959455	0	0	0	0.067624	0.016906	0	0	0	0	0	0	0	0	0	0	0	0	0	0	0	0	0	0	0	0	0	0	0	0	0	0	0	0	0.184627	0.0461567	0.24601	0	0.085331	0
AAEL025808	0.413845	0.03606	0.117177	0.144575	0.177914	0.311282	0.039118	0.200515	0.040659	0.147894	0	0.121555	0.111993	0	0.058387	0.147255	0.046346	0.126894	0.174399	0.123723	0.07138	0.065254	0.115649	0.112195	0.0911195	0.446633	0.203107	0.217427	0.306922	0.293522	0.456242	0.247858	0.374371	0.474917	0.388347	0.516855	0.321799	0.309249	0.358309	0.376553	0.741017	0.367447	0.700899	0.809837	0.6548	0.530976	0.547647	0.367331	0.321255
AAEL009183	20.9885	29.0594	16.9281	22.261	22.3093	30.0765	19.0261	26.471	21.2237	24.1993	23.8953	20.2615	17.3977	17.5426	19.7743	22.8004	18.9216	17.7902	21.6016	20.2785	22.8541	19.7916	21.0695	16.7414	20.1142	31.0311	23.4246	25.9735	31.3796	27.9522	44.0003	46.8217	41.6017	35.6642	42.022	49.712	44.5816	42.0222	35.1508	42.8667	56.5104	50.9428	54.6131	52.6628	53.6822	68.1818	63.2652	78.5717	60.2633
AAEL023587	0.069441	0.337202	0	0	0.101661	0	0	0	0	0	0	0	0	0	0	0	0	0.145064	0.230073	0.0937842	0	0	0.230328	0	0.057582	0	0	0	0.334123	0.0835308	0	0.448973	0.431618	0	0.220148	0	0	0.281105	0	0.0702762	0.247035	0.086464	0	0	0.0833747	0.743028	0	0.76194	0.178872
AAEL027505	20.132	27.1088	19.1314	19.6784	21.5127	23.8958	24.6557	18.4278	20.3851	21.8411	19.85	18.8891	15.2763	16.5563	17.6429	17.5716	16.9285	12.8995	17.1526	16.1381	16.6113	20.5923	15.7914	18.8356	17.9577	22.2277	25.3542	26.4409	27.5117	25.3836	36.7888	31.6247	31.8701	39.2881	34.8929	30.3409	38.6624	34.8704	34.4714	34.5863	38.8885	43.5359	44.5909	56.9452	45.9901	52.4481	63.0677	54.1136	55.7755
AAEL009192	0.362389	0.218984	0.026589	0.133458	0.185355	0.098439	0.110994	0.131941	0.149651	0.122756	0.094207	0.083747	0	0.134882	0.078209	0	0	0	0	0	0	0.084704	0.020048	0.040436	0.036297	0.095109	0.05196	0	0.265437	0.103126	0.024234	0.202421	0	0.139141	0.091449	0	0	0	0.124032	0.031008	0.1722	0.111648	0.27639	0.688654	0.312223	0.163956	0.080402	0.139427	0.2982
AAEL009185	287.48	360.403	269.639	270.719	297.06	345.102	354.859	330.088	317.393	336.86	373.341	422.415	332.034	400.042	381.958	629.432	724.676	551.373	657.503	640.746	940.56	977.443	935.011	981.103	958.53	1117.88	1279.57	1292.27	1125.4	1203.78	557.797	830.489	465.422	506.47	590.045	199.325	485.217	280.186	188.071	288.2	146.009	258.747	136.836	184.246	181.459	194.991	328.363	218.554	220.588
AAEL025890	0.018711	0.191624	0.299017	0.050858	0.140052	0.092053	0.135623	0.098052	0.220499	0.136557	0.357452	0.080424	0.058645	0.093614	0.147534	0.21372	0.140484	0.079716	0.149567	0.145872	0.101401	0	0.101594	0.054821	0.064454	0.04723	0.164195	0.144323	0.038117	0.0984663	0.071581	0.115736	0.108517	0.085949	0.0954457	0.040701	0.112158	0.073768	0.03155	0.0645442	0.122932	0.073536	0.260504	0.204761	0.165433	0.327398	0.318187	0.27602	0.236027
AAEL009180	0.284862	0.237218	0.224545	0.149473	0.224024	0.354577	0.031459	0.368321	0.155309	0.227416	0.067371	0.043857	0.047994	0.062224	0.0553615	0.08608	0.042908	0.013396	0.081201	0.0558962	0.043993	0.020373	0.103826	0.035525	0.0509293	0	0.141385	0.111811	0.078873	0.0830172	0.251512	0.18262	0.231184	0.238212	0.225882	0.36794	0.189845	0.118581	0.14249	0.204714	0.180214	0.266146	0.291452	0.208829	0.23666	0.440767	0.19191	0.355784	0.17575
AAEL009191	0.319378	0.375993	0.201024	0.150889	0.261821	0.233944	0.340719	0.266155	0.043415	0.221058	0.270954	0	0.23118	0.031674	0.133452	0	0.325383	0.143155	0.223664	0.17305	0.468646	0.325771	0.238753	0.235598	0.317192	0.208164	0.587666	0.452458	0.283834	0.38303	0.078292	0.249857	0.316611	0.253017	0.224444	0.109146	0.183976	0.326048	0.083368	0.175634	0.489025	0.513689	0.357898	0.321765	0.420594	0.353421	0.665579	0.628473	0.383098
AAEL019892	0.10192	0.062624	0.090386	0.096383	0.0878282	0.012665	0.043148	0.061403	0.022287	0.0348757	0.126022	0.013674	0.009821	0.050533	0.0500125	0.102129	0	0.012862	0.058965	0.043489	0.02608	0.039958	0	0.009159	0.0187992	0.034909	0.097797	0.096749	0.029747	0.0648005	0.13433	0.058917	0.074527	0.057351	0.0812812	0	0.010628	0.020486	0.031027	0.0155353	0.250261	0.130023	0.141944	0.259685	0.195478	0.171181	0.205481	0.091514	0.129992
AAEL010647	0.063886	0.051355	0	0	0.0288102	0.068273	0	0	0	0.0170683	0.071922	0	0	0	0.0179805	0.047876	0	0	0	0.011969	0	0	0	0	0	0	0	0	0	0	0	0	0	0	0	0.119046	0	0	0	0.0297615	0	0	0.145828	0	0.036457	0.064953	0	0.074173	0
AAEL021805	0.929966	0.775237	0.663559	1.23604	0.9012	1.24197	1.20338	0.772487	0.670619	0.972114	1.69056	1.04082	1.43965	1.45062	1.40541	2.57271	2.15925	1.33126	1.93735	2.00014	2.76491	1.63335	2.42491	2.28157	2.27619	2.82929	3.03415	2.319	3.08919	2.81791	3.42968	2.11552	2.48194	2.95022	2.74434	2.16413	2.19416	2.43255	2.63629	2.35678	1.94232	2.81365	2.01323	1.47952	2.06218	1.80767	2.22821	1.7568	1.87533
AAEL027221	0.078516	0	0	0	0.019629	0.072508	0	0	0	0.018127	0	0	0	0	0	0	0	0	0	0	0.036036	0	0	0	0.009009	0.025807	0	0	0	0.00645175	0	0	0	0	0	0	0	0.03666	0	0.009165	0	0	0	0	0	0	0	0	0
AAEL022509	0.650178	0.595893	0.217222	0.720564	0.545964	0.585436	0.525126	0.445071	0.327583	0.470804	0.691167	0.689331	0.712748	1.02337	0.779153	1.57095	1.19845	0.746378	1.34677	1.21564	1.71528	0.973737	1.23257	1.15018	1.26794	2.10237	1.8594	1.49483	1.80357	1.81504	2.31693	1.83958	1.64387	1.48479	1.82129	1.44324	1.17664	1.19565	1.66366	1.36979	1.03652	1.27629	0.760389	0.769421	0.960654	1.21126	0.975966	0.705833	1.0511
AAEL008514	6.4693	6.3204	5.59364	6.96393	6.33682	6.90767	7.28214	7.54533	6.19565	6.9827	4.08316	4.46663	4.51297	4.81499	4.46944	7.21324	6.81593	4.54104	7.2011	6.44283	12.2459	8.12573	10.5163	21.0484	12.9841	35.9185	28.8557	37.4664	37.3852	34.9064	62.6538	34.0756	46.6807	52.6807	49.0227	70.2553	39.4814	68.7858	68.876	61.8496	38.905	43.8729	38.761	24.3953	36.4835	14.9051	14.4023	21.7296	15.5598
AAEL023642	0	0.018052	0	0	0.004513	0	0	0	0	0	0	0	0	0	0	0	0	0	0	0	0	0	0	0.036875	0.00921875	0	0	0	0	0	0	0	0	0.025665	0.00641625	0	0	0	0	0	0	0	0	0	0	0	0	0	0
AAEL012674	13.545	13.0747	10.8153	12.8141	12.5623	14.231	13.5394	15.8855	13.8201	14.369	20.3566	21.6416	19.2818	27.3042	22.146	46.1133	45.6517	38.6051	59.1307	47.3752	95.7903	44.1088	72.9806	81.8052	73.6712	110.574	79.4891	88.9218	97.8133	94.1997	47.6909	39.3786	33.3863	37.6007	39.5141	57.7006	38.3285	46.4687	60.0531	50.6377	66.8856	47.4377	65.0755	69.1077	62.1266	30.2546	39.7764	38.7847	29.0536
AAEL008507	8.79419	7.87338	7.78012	7.47404	7.98044	7.36653	6.72901	6.75739	7.73947	7.1481	5.88052	5.89646	5.62171	6.08717	5.87146	5.26959	5.24091	4.49394	4.95614	4.99014	4.63113	5.78678	4.63451	4.96078	5.0033	3.70117	6.0806	4.44822	4.30665	4.63416	5.29024	4.97909	4.1372	4.36599	4.69313	5.14046	6.48728	6.15564	6.29949	6.02072	9.71993	8.97919	10.953	11.9847	10.4092	18.665	17.4823	18.2228	16.145
AAEL020636	2.36686	3.25757	1.94001	2.50597	2.5176	2.18455	2.10897	0.556551	1.42268	1.56819	0.991201	0.686923	0.994386	0.692435	0.841236	0.893761	1.22693	0.864449	0.915769	0.975226	1.25007	1.72943	1.15658	0.820982	1.23926	1.33196	1.98777	1.18215	1.71178	1.55341	1.82708	2.22707	1.66956	1.58777	1.82787	3.48293	3.04783	2.4161	3.123	3.01746	5.29524	3.84577	4.49647	5.30656	4.73601	4.48502	6.51248	5.42672	5.26743
AAEL024921	0.933061	0.954879	0.839957	0.737698	0.866399	0.759998	0.612733	0.650428	0.673377	0.674134	0.717863	0.493494	0.736498	0.477769	0.606406	0.945403	0.451133	0.432623	0.431372	0.565133	0.910858	0.340935	0.406847	0.363379	0.505505	0.633721	0.614204	1.02032	0.712845	0.745273	0.756149	0.874779	0.66448	0.670593	0.7415	0.966566	0.405863	0.596321	0.556671	0.631355	1.6206	0.983299	1.79386	1.90366	1.57536	2.17973	1.53269	1.92828	1.12478
AAEL008509	2.3338	2.11931	1.76208	1.80211	2.00432	2.85913	1.76135	3.91586	2.46628	2.75066	7.25435	8.29048	9.62257	6.28515	7.86314	4.12986	3.82303	3.43773	3.32378	3.6786	3.36977	3.49653	3.51577	3.3656	3.43692	3.3919	3.32417	3.74365	3.3418	3.45038	2.40525	3.295	2.27545	2.26296	2.55966	2.28587	2.87163	2.26295	2.60596	2.5066	2.5259	2.99768	3.19905	3.62649	3.08728	6.18873	6.09467	4.7134	6.5175
AAEL008517	53.806	71.4665	55.1242	55.9242	59.0802	64.0201	62.4881	59.9851	57.457	60.9876	91.2261	103.503	94.7837	99.7222	97.3087	114.455	127.688	123.359	118.405	120.977	106.071	142.173	134.305	108.698	122.811	42.6084	81.916	57.9182	42.0404	56.1208	20.1823	42.2524	20.2568	21.1764	25.967	16.7916	34.3765	20.0489	15.4869	21.676	29.1451	38.4651	36.9855	48.8691	38.3662	151.758	126.465	150.99	214.58
AAEL020434	5.74258	5.11301	4.38074	4.69493	4.98282	5.51738	4.47847	4.89391	4.38831	4.81951	4.20667	4.49052	4.02692	4.18206	4.22654	4.79585	5.18086	3.47474	4.54566	4.49928	4.48923	4.81832	4.31458	4.28868	4.4777	4.4781	5.3117	4.654	4.29253	4.68408	5.75065	6.05645	5.3335	6.09977	5.81009	5.65401	6.19204	5.47917	6.9245	6.06243	9.83726	8.38648	9.15018	10.3312	9.42627	15.1523	14.1196	15.4806	13.839
AAEL008510	3.4215	1.73394	2.13988	2.55942	2.46369	2.55799	1.60469	1.57548	2.1918	1.98249	8.64035	5.81915	6.70296	5.65998	6.70561	9.27645	4.78995	1.28457	5.15455	5.12638	6.2581	5.02319	4.45941	4.71724	5.11449	8.70979	5.14529	6.48779	7.12817	6.86776	14.2411	7.05353	7.88768	10.4912	9.91839	13.152	5.20504	8.62024	8.7247	8.9255	11.3118	8.97899	8.1496	6.26371	8.67602	3.96447	4.49846	3.36218	3.19
AAEL004291	17.1027	22.285	15.9863	16.6942	18.0171	17.9966	18.1312	15.6771	16.7907	17.1489	24.0996	17.987	18.4562	21.1743	20.4293	23.4356	23.6586	21.6273	25.5513	23.5682	24.5619	23.2749	25.4304	23.4187	24.1715	19.0935	19.507	18.7311	16.1941	18.3814	14.2721	19.0452	15.6318	14.8324	15.9454	18.3621	18.3804	17.4058	15.7132	17.4654	19.7499	24.3048	27.7031	30.8094	25.6418	46.0403	41.2256	47.9577	52.5096
AAEL025518	0.263328	0.402559	0.307528	0.370241	0.335914	0.275008	0.247702	0.284608	0.268588	0.268977	0.172282	0.192739	0.15274	0.229795	0.186889	0.088745	0.21337	0.094955	0.140065	0.134284	0.034057	0	0.239313	0.100124	0.0933735	0.246287	0.169217	0.121232	0.151753	0.172122	0.239659	0.251884	0.348428	0.27027	0.27756	0.272407	0.240666	0.198458	0.24016	0.237923	0.557448	0.455329	0.624771	0.992075	0.657406	0.468319	0.431828	0.342732	0.371154
AAEL024204	8.94509	7.32187	7.69403	9.25675	8.30444	7.78722	7.58748	6.71651	7.91811	7.50233	4.60749	3.5726	4.26564	6.13565	4.64534	6.8975	5.63159	3.58597	5.25277	5.34196	5.88694	4.75992	5.11078	6.97749	5.68378	8.21635	7.58164	7.65467	8.03878	7.87286	9.36803	8.6285	8.94482	9.39712	9.08462	9.78321	8.49396	9.58217	11.5381	9.84935	15.0869	11.6692	14.428	16.0903	14.3186	15.2902	14.0611	15.8577	12.7999
AAEL013853	1.20338	2.33597	1.3646	2.77218	1.91903	0.386251	1.66397	0.649406	0.949784	0.912352	0.457701	1.30103	0.807426	1.77415	1.08508	0.483264	0.844527	0.3006	0.609431	0.559455	0.329632	0.736554	0.373135	0.496172	0.483873	0.364837	0.363819	0.265548	0.605495	0.399925	0.326669	0.406422	0.67604	0.708074	0.529301	0.573491	1.21306	0.614435	1.0452	0.861548	1.54975	1.40093	3.11725	4.92796	2.74897	4.68337	2.8619	2.1477	3.46905
AAEL018267	20.4449	19.9373	17.231	20.9909	19.651	20.0992	19.264	18.7344	18.3321	19.1074	50.6901	89.6293	76.7371	73.7773	72.7085	62.4534	79.7693	52.0855	50.3639	61.168	38.3576	58.1854	47.5165	37.6526	45.428	33.6896	53.8976	34.1826	43.9174	41.4218	30.6566	38.1902	24.2845	26.0989	29.8076	19.0889	30.2573	18.6813	18.907	21.7336	21.3117	37.236	22.299	27.2656	27.0281	30.2614	41.5729	27.9417	33.749
AAEL014450	11.0121	11.0209	11.2759	10.0023	10.8278	10.8755	8.51169	9.3786	8.84811	9.40348	7.39531	6.26984	8.20781	6.79236	7.16633	7.51991	6.18091	5.41542	5.16813	6.07109	7.18308	5.68026	7.31407	6.1211	6.57463	7.5764	6.74165	7.56776	6.48567	7.09287	10.3848	8.50488	10.3075	9.20101	9.59954	11.104	8.50699	9.84421	10.843	10.0745	21.0786	14.5902	25.4789	23.2933	21.1102	25.7173	19.886	30.0691	23.7968
AAEL026039	1.33117	0.978119	1.86572	1.51122	1.42156	1.13771	1.06387	1.58322	1.19917	1.24599	0.374316	0.1746	0.327266	0.080833	0.239254	0.098749	0.189291	0.08065	0.057085	0.106444	0.267826	0.052373	0.146384	0.167373	0.158489	0.278931	0.318474	0.237287	0.382615	0.304327	0.84498	0.767392	1.0828	0.914927	0.902524	0.994194	0.847574	1.40722	1.67622	1.2313	4.44247	2.62287	8.43363	5.83876	5.33443	5.03854	3.29917	4.07993	4.08604
AAEL021196	0.856542	0.76088	1.51752	1.20064	1.08389	1.14427	0.91217	1.19695	0.824502	1.01947	0.150547	0.20325	0.27485	0.105944	0.183648	0.091891	0.131743	0.161085	0.112275	0.124248	0.116278	0.13671	0.083743	0.147457	0.121047	0.158819	0.177869	0.222783	0.492985	0.263114	1.12458	0.721651	0.773434	0.998069	0.904435	0.95751	0.449712	0.894081	1.02509	0.831598	3.55735	1.95282	5.53952	4.24449	3.82355	5.07526	2.13432	2.653	2.868
AAEL007738	5.93476	7.79517	5.7598	6.21256	6.42557	9.35182	8.41949	7.33198	6.05419	7.78937	8.39701	9.6061	7.54209	10.4096	8.9887	11.5705	11.0342	9.45331	11.0914	10.7873	11.2184	9.737	11.2804	10.0844	10.58	11.5735	12.0565	10.1899	8.1168	10.4842	6.91374	8.87141	7.40378	7.19373	7.59566	6.12956	9.61473	6.44174	7.15194	7.33449	8.72523	9.30912	10.8806	10.3744	9.82232	17.1416	17.5416	16.248	16.7214
AAEL007731	29.525	36.1472	28.1955	26.8109	30.1696	33.876	28.1885	32.843	30.5711	31.3697	15.8553	14.5549	14.9054	13.3753	14.6727	11.1696	10.1201	7.87339	11.1435	10.0766	12.8752	15.171	12.2	17.4114	14.4144	32.4919	25.4936	28.6005	35.9465	30.6331	71.1767	51.9672	61.7355	62.0137	61.7233	84.5166	63.3791	80.4669	80.3535	77.179	130.839	118.416	135.082	124.631	127.242	161.808	118.589	120.582	91.7222
AAEL022560	0	0	0.113026	0.118772	0.0579495	0	0	0.48892	0.215969	0.176222	0	0.244223	0.133261	0	0.094371	0	0	0	0.31002	0.077505	0	0.216786	0.190582	0.56385	0.242804	0.315472	0	0.231368	0	0.13671	0	0.149409	0	0.495781	0.161298	0	0.164453	1.48352	0.07687	0.43121	0.39909	1.59176	0.933019	1.06892	0.998199	0.784361	0.367183	0.304281	0.900848
AAEL007736	0.039987	0.036294	0.050776	0	0.0317643	0.015868	0.013095	0.055346	0.020531	0.02621	0.024907	0	0	0	0.00622675	0.053428	0.047429	0	0	0.0252143	0.024437	0.03186	0.023447	0.033246	0.0282475	0.095119	0.080526	0.066709	0	0.0605885	0.171773	0.036243	0.046581	0.017527	0.068031	0.092747	0.065798	0	0.082555	0.060275	0.175958	0.169471	0.073998	0.059858	0.119821	0	0.027373	0.051457	0.012722
AAEL023134	0	0	0.077465	0	0.0193662	0.371571	0	0.231727	0	0.150825	0.336085	0	0.284964	0.149506	0.192639	0.294387	0.25366	0	0	0.137012	0.343933	0.707943	0	0	0.262969	0.516432	0.336491	0.585766	0.190369	0.407264	0.212682	0.459766	0	0.217003	0.222363	0.78586	0.316887	0.464686	0	0.391858	0.615209	0.86175	0.087228	0	0.391047	0.274593	0.451931	0	0.183276
AAEL026451	0.450731	0.602154	0.665935	0.632179	0.58775	0.995031	0.588079	0.752298	0.285226	0.655158	0.247761	0.235169	0.337522	0.44044	0.315223	0.311574	0.258279	0.425058	0.402328	0.34931	0.296138	0.357718	0.538324	0.272807	0.366247	0.479204	0.542769	1.31972	0.239404	0.645275	0.592573	0.470508	0.28228	0.707884	0.513311	0.568126	0.593371	0.46155	0.517819	0.535216	1.36064	1.1538	1.0999	1.35221	1.24164	1.68726	1.17898	1.94247	1.93316
AAEL009031	0.849185	1.67199	1.62029	1.40424	1.38643	0.968053	0.997163	1.09178	1.03393	1.02273	0.54821	0.412234	0.567631	0.536001	0.516019	0.469041	0	0.468934	0.788121	0.431524	0.600704	0.829018	0.565119	0.707151	0.675498	0.449928	0.994531	1.32481	0.887323	0.914149	0.956365	0.966396	0.855953	1.39556	1.04357	0.748673	0.820186	1.01413	1.07834	0.915331	2.37053	1.57291	2.21133	2.96128	2.27901	2.35818	2.75283	2.46108	2.62432
AAEL011168	15.2742	22.3059	13.5085	15.7143	16.7007	19.5113	14.0471	17.3898	14.9197	16.467	13.9219	13.6093	13.4512	14.0834	13.7664	15.009	9.57952	6.78557	8.49851	9.96815	11.5462	15.1335	10.9083	11.2332	12.2053	16.4382	17.6037	14.7946	14.4254	15.8155	17.65	16.7348	14.7774	13.9746	15.7842	17.2654	19.2355	17.1336	15.7081	17.3356	24.6964	26.0856	25.3149	26.0552	25.538	32.46	32.287	29.647	33.3287
AAEL009036	14.5776	8.28023	7.15031	4.34544	8.58839	4.08145	3.57934	6.76131	4.85001	4.81803	2.38825	4.58845	3.13617	1.56492	2.91944	5.55451	0.959113	4.61578	1.04831	3.04443	2.64195	3.3317	2.03231	1.90535	2.47783	1.23379	4.44944	4.54921	2.90622	3.28467	1.35318	0.495531	0.667618	0.409814	0.731535	0.457314	0.23789	0.287924	0.171145	0.288568	0.20974	0.319653	0.12012	0.046748	0.174065	0.303542	0.471737	0.059075	0.099223
AAEL009027	3.40609	4.43583	3.6563	4.54915	4.01184	4.18802	4.06425	3.91571	3.96128	4.03232	4.67417	4.10953	4.40438	4.87946	4.51689	5.36076	5.76662	4.73938	5.78524	5.413	4.85853	5.29443	4.22279	4.90895	4.82117	3.92013	4.09714	3.78914	3.78968	3.89902	2.57856	3.91543	3.08026	2.61981	3.04851	3.88344	3.42108	3.30158	3.60787	3.55349	4.53662	5.01712	4.96073	5.59662	5.02777	10.6366	8.1662	10.9745	10.5572
AAEL009026	40.2901	42.48	38.9077	41.0604	40.6846	45.688	37.7257	38.9895	37.7722	40.0439	36.1378	30.2744	34.7777	34.3589	33.8872	30.7982	28.4547	27.5704	27.9977	28.7053	32.2683	25.7808	30.5743	29.9042	29.6319	30.738	27.8957	31.9647	29.099	29.9243	41.3229	31.5833	35.6321	34.7458	35.821	48.9312	34.7016	41.6109	45.939	42.7957	67.7273	57.1527	75.4308	68.2478	67.1397	82.7444	66.929	74.565	62.0291
AAEL009035	0	0	0	0	0	0	0	0	0	0	0	0	0	0	0	0	0	0	0	0	0	0	0	0	0	0	0	0	0	0	0	0	0	0	0	0	0	0	0	0	0	0	0	0	0	0	0	0	0
AAEL009038	0.925413	1.57524	0.547004	0.118358	0.791504	1.22562	0.784892	0.259942	0.517394	0.696962	0.696127	0.543863	0.188333	0.3021	0.432606	0.5803	0.316556	0.447101	0.257061	0.400255	0.628263	0.907981	0.42935	0.11652	0.520528	1.03582	1.48901	0.40732	0.800257	0.933101	1.79956	4.40144	3.71925	3.99388	3.47853	3.82942	5.17877	3.16083	3.68038	3.96235	3.37729	5.30377	5.1556	5.31128	4.78699	3.31868	6.0611	2.81621	2.60444
AAEL001041	26.914	34.9089	31.8945	28.1397	30.4643	35.1992	25.928	33.0306	36.0744	32.5581	42.6803	40.1672	39.1201	38.2281	40.0489	29.7612	29.4084	26.9367	28.7328	28.7098	23.4219	24.2804	22.3561	17.9575	22.004	24.208	25.1895	21.7658	18.6182	22.4454	37.8167	28.4031	31.3116	29.7577	31.8223	36.7713	36.9828	34.04	34.6869	35.6203	57.8436	51.4206	62.0663	69.1268	60.1143	83.8941	75.1859	66.8415	65.4368
AAEL023583	0	0	0.032707	0	0.00817675	0.006175	0	0.01533	0	0.00537625	0	0	0	0	0	0	0	0	0	0	0	0.035233	0	0	0.00880825	0	0	0	0	0	0	0	0	0	0	0	0.015063	0	0	0.00376575	0.017455	0	0	0.057461	0.018729	0.05789	0.043466	0.010013	0.039476
AAEL013997	11.2765	11.4244	9.5464	9.9773	10.5562	11.4608	8.49455	10.6094	10.2836	10.2121	6.95161	5.59229	7.69846	6.23764	6.62	6.5646	5.65994	4.40638	4.80288	5.35845	7.02421	7.1373	6.50059	6.59174	6.81346	7.12198	7.3647	6.61072	5.78301	6.7201	8.67632	8.3101	7.03119	7.32335	7.83524	9.09188	7.70359	8.61067	6.86449	8.06766	13.2697	13.0916	13.5652	14.0645	13.4978	22.2587	19.0358	20.9775	22.6215
AAEL013991	0.213715	0.030083	0.064373	0.11012	0.104573	0.096527	0.128387	0.13053	0.197669	0.138278	0.151788	0.062076	0.059691	0.024004	0.0743898	0.166273	0	0.051997	0.106386	0.081164	0.297672	0	0	0.18336	0.120258	0.202592	0.019695	0	0.098707	0.0802485	0.158689	0.020116	0.06205	0.037031	0.0694715	0.052264	0	0.03078	0	0.020761	0.136806	0.061985	0.071141	0.294141	0.141018	0.348677	0.239328	0	0.168716
AAEL013995	8.71027	10.185	7.98215	8.77127	8.91218	10.1376	8.02295	9.14792	8.7862	9.02366	5.80235	4.77566	4.86044	5.73431	5.29319	5.18642	5.36742	4.73206	5.35831	5.16106	5.38294	5.27908	5.64236	5.92215	5.55663	9.0197	8.41008	8.61988	9.19249	8.81054	16.6414	13.579	15.7857	16.937	15.7357	25.2586	16.3312	21.1631	22.3473	21.2751	33.7767	27.3166	31.6241	32.2553	31.2432	30.7159	25.6151	28.3072	22.301
AAEL013992	21.9187	25.4876	21.8044	19.1288	22.0849	23.7385	24.9074	25.498	22.8835	24.2569	36.1781	42.2183	38.8906	38.908	39.0487	54.9635	58.5393	53.5849	61.0763	57.041	60.666	69.7527	66.8566	71.9267	67.3005	45.2655	45.9023	50.5322	36.1979	44.4744	21.1243	31.7207	22.0619	23.8894	24.6991	24.5047	25.7343	20.7265	19.328	22.5734	27.0314	23.9555	28.9303	34.6857	28.6507	45.3669	35.9764	46.3192	58.2064
AAEL013999	7.85403	8.94518	6.23792	7.10083	7.53449	10.3532	6.33553	7.05132	6.90199	7.6605	8.75507	8.3308	8.02041	8.21631	8.33065	8.62978	8.237	8.31034	8.02601	8.30078	6.52775	7.29983	7.36113	7.35796	7.13667	9.63015	9.35364	9.9112	9.37722	9.56805	10.9265	11.96	9.3753	10.0634	10.5813	11.2497	11.8567	11.2748	9.05604	10.8593	16.5225	15.5948	16.9816	16.4042	16.3758	28.816	23.7581	28.5649	22.0197
AAEL013998	2.83037	3.60206	2.91287	3.06996	3.10381	3.06509	3.36481	2.7172	3.2832	3.10757	5.56501	3.27783	4.67692	5.47683	4.74915	5.71443	7.14262	5.93771	7.61675	6.60288	5.71587	5.46195	6.84379	5.97014	5.99794	3.09745	4.35257	3.01548	1.86528	3.0827	2.15115	2.94126	2.51865	2.61611	2.55679	2.36146	3.7291	2.455	1.85374	2.59983	3.45774	3.47329	3.89441	4.237	3.76561	9.14183	6.65928	8.85258	7.63223
AAEL026356	0.162787	0	0	0.099439	0.0655565	0	0.392038	0.261059	0.15298	0.201519	0	0.121902	0.630461	0	0.188091	0.428171	0	0.435218	0.299818	0.290802	0.242514	0	0.347416	0.269181	0.214778	0	0	0	0	0	0	0.299334	0.220277	0.592723	0.278083	0.586593	0.473369	0.366776	0.453139	0.469969	0.286786	0.139467	0	0	0.106563	0.299627	0	0.398673	0.063551
AAEL013994	6.42682	6.70666	4.15789	7.0107	6.07552	6.96062	4.34689	5.87613	6.85621	6.00996	8.14957	6.43118	5.84855	6.19976	6.65726	8.94961	9.95366	8.08057	9.46415	9.112	8.28815	9.38114	10.0275	11.0938	9.69767	11.8926	11.878	9.3648	9.09845	10.5585	11.6352	10.7812	10.5323	10.2444	10.7983	14.9916	10.5148	13.7789	14.6806	13.4915	18.8803	15.5842	15.754	17.5841	16.9506	17.1514	17.5251	14.24	16.2772
AAEL013993	0.618617	0.70097	1.25891	0.443501	0.755499	1.18398	0.793671	0.782855	0.604029	0.841134	0.677523	0.410734	0.71906	0.941436	0.687188	0.896603	0.632152	0.1518	0.075694	0.439062	0.299034	0.318796	0.384435	0.671591	0.418464	0.920423	0.652001	0.703866	0.520289	0.699145	0.773111	0.940595	0.499406	0.892149	0.776315	0.896156	0.755126	1.44284	0.839153	0.983318	2.27064	0.65383	1.49484	1.85482	1.56853	2.3004	1.36277	2.50478	2.63181
AAEL013996	3.17345	3.61703	2.73105	1.70925	2.8077	2.86878	2.78658	1.4648	1.84325	2.24085	1.08908	0.848054	1.17679	1.85762	1.24289	2.659	1.42677	1.21143	1.11353	1.60268	1.35036	2.3354	1.92311	1.71449	1.83084	6.76801	6.50635	6.26257	6.05004	6.39674	7.59689	7.71478	5.89636	5.24916	6.6143	4.78837	5.71379	4.04353	3.74246	4.57204	5.88849	6.12115	4.08834	5.74234	5.46008	4.62235	4.21199	3.9221	4.10637
AAEL026130	0.474665	0.651324	0.510241	0.650214	0.571611	0.852509	0.542968	0.599547	0.639007	0.658508	0.363632	0.156295	0.308587	0.448276	0.319198	0.16482	0.333807	0.328452	0.477942	0.326255	0.63814	0.478023	0.444424	0.596269	0.539214	0.780557	0.607075	0.79977	0.182345	0.592437	1.30227	1.019	0.688485	0.723629	0.933346	1.09945	0.738694	1.43661	1.27274	1.13687	1.88472	0.99467	2.1885	1.96376	1.75791	1.74147	1.46534	2.16432	1.306
[truncated: 15,736 more rows]
[truncated: 6 more columns]

## Sheet: average_TPM
GeneID	0_avg	1_avg	4_avg	6_avg	8_avg	12_avg	18_avg	24_avg	36_avg	48_avg	72_avg
[truncated: 16,822 more rows]
